# Supplementary material for: A cellular platform for production of C4 monomers
Source: Royal Society of Chemistry journal article supplement (doi:10.1039/d3sc02773b), 2023-01-01
Supplement: d3sc02773b1.pdf [file d3sc02773b1.pdf]

Supplementary Information for

**A Cellular Platform for Production of C<sub>4</sub> Monomers**

Matthew A. Davis<sup>§</sup>, Vivian Yaci Yu<sup>§</sup>, Beverly Fu, Miao Wen, Edward J. Koleski, Joshua Silverman,  
Charles A. Berdan, Daniel K. Nomura, and Michelle C. Y. Chang\*

**Materials and Methods**

|                                                                         |     |
|-------------------------------------------------------------------------|-----|
| <i>Commercial materials</i>                                             | S2  |
| <i>Bacterial strains</i>                                                | S3  |
| <i>Gene and plasmid construction</i>                                    | S3  |
| <i>Expression and purification of AdhE2 constructs</i>                  | S9  |
| <i>AdhE2 biochemical assays</i>                                         | S9  |
| <i>ALDH domain phylogenetic analysis</i>                                | S10 |
| <i>Production of C<sub>4</sub> compounds in shake flasks</i>            | S11 |
| <i>Quantification of n-butanol titers</i>                               | S11 |
| <i>Quantification of 1,3-butanediol and 4-hydroxy-2-butanone titers</i> | S12 |
| <i>Anaerobic growth competition and enrichment validation</i>           | S12 |
| <i>Adaptive evolution</i>                                               | S12 |
| <i>Genome sequencing</i>                                                | S13 |
| <i>Cell lysate enzyme assays</i>                                        | S13 |
| <i>RNA sequencing and analysis</i>                                      | S14 |
| <i>Generation of chromosomal point mutations</i>                        | S15 |

**Tables and Figures**

|                                                                                                                             |      |
|-----------------------------------------------------------------------------------------------------------------------------|------|
| <b>Table S1.</b> <i>Strains, plasmids, oligonucleotides, and sequences</i>                                                  | S17  |
| <b>Figure S1</b> <i>Fermentation pathways of E. coli and gene knockouts</i>                                                 | S138 |
| <b>Figure S2</b> <i>Dependence of the n-butanol:ethanol ratio on oxygen</i>                                                 | S139 |
| <b>Figure S3.</b> <i>Biochemical characterization of AdhE2 constructs</i>                                                   | S140 |
| <b>Figure S4.</b> <i>Phylogenetic analysis of ALDH domains</i>                                                              | S142 |
| <b>Figure S5.</b> <i>Design and screening of AdhE2 mutants</i>                                                              | S143 |
| <b>Figure S6.</b> <i>Screening of monofunctional ALDHs for C<sub>4</sub> selectivity</i>                                    | S144 |
| <b>Figure S7.</b> <i>Screening ALDHs for production of BDO</i>                                                              | S145 |
| <b>Figure S8.</b> <i>Identification and screening of ADHs for BDO production</i>                                            | S149 |
| <b>Figure S9.</b> <i>Screening of ALDH-ADH pairs for BDO vs. HB production</i>                                              | S152 |
| <b>Figure S10.</b> <i>Screening of sADHs to increase BDO selectivity</i>                                                    | S154 |
| <b>Figure S11.</b> <i>Development and validation of a genetic selection for n-butanol production</i>                        | S156 |
| <b>Figure S12.</b> <i>Selection of n-butanol strains using EMS mutagenesis under anaerobic conditions</i>                   | S157 |
| <b>Figure S13.</b> <i>Characterization of adaptive evolution of n-butanol strains under anaerobic conditions</i>            | S158 |
| <b>Figure S14</b> <i>Characterization of adaptive evolution of BDO and HB strains under anaerobic conditions</i>            | S161 |
| <b>Figure S15.</b> <i>Production titers of C<sub>4</sub> monomers of parent and evolved strains with an organic overlay</i> | S163 |
| <b>Table S2.</b> <i>Genome sequencing of evolved n-butanol, BDO, and HB strains</i>                                         | S165 |
| <b>Figure S16.</b> <i>Cell lysate enzyme activities of n-butanol pathway enzymes for parent and evolved strains</i>         | S169 |
| <b>Figure S17.</b> <i>RNA-Seq data for the WT and the BDO evolved strain</i>                                                | S170 |
| <b>Figure S18.</b> <i>COG analysis of differentially expressed genes</i>                                                    | S171 |
| <b>Figure S19.</b> <i>Acetyl-CoA pool analysis between parent, mutant, and the evolved strain</i>                           | S172 |
| <b>Figure S20.</b> <i>GO enrichment of differentially expressed genes</i>                                                   | S173 |

**Literature Cited**

S174

## Materials and Methods

**Commercial materials.** Terrific Broth (TB), LB Broth Miller (LB), LB Agar Miller, glycerol, and dimethylsulfoxide (DMSO) were purchased from EMD Biosciences (Darmstadt, Germany). Carbenicillin (Cb), kanamycin (Km), chloramphenicol (Cm), isopropyl- $\beta$ -D-thiogalactopyranoside (IPTG), phenylmethanesulfonyl fluoride (PMSF), tris (hydroxymethyl) aminomethane hydrochloride (Tris-HCl), sodium chloride, dithiothreitol (DTT), 4-(2-hydroxyethyl)-1-piperazineethanesulfonic acid (HEPES), and magnesium chloride hexahydrate were purchased from Fisher Scientific (Pittsburgh, PA). Tris-(2-carboxyethyl)phosphine hydrochloride (TCEP) was purchased from Biosynth, Inc. (Itasca, IL). Imidazole was purchased from Acros Organics (Morris Plains, NJ). Sodium hydroxide was purchased from Avantor Performance Materials (Center Valley, PA). Coenzyme A sodium salt hydrate (CoA), acetyl-CoA, butyryl-CoA, acetoacetyl-CoA,  $\beta$ -nicotinamide adenine dinucleotide reduced dipotassium salt (NADH),  $\beta$ -nicotinamide adenine dinucleotide hydrate (NAD<sup>+</sup>), formic acid, trichloroacetic acid (TCA),  $\beta$ -mercaptoethanol (BME), lysozyme from chicken egg white, and bovine serum albumin (BSA) were purchased from Sigma-Aldrich (St. Louis, MO). Sodium phosphate dibasic heptahydrate, and N,N,N',N'-tetramethyl-ethane-1,2-diamine (TEMED) were purchased from Sigma-Aldrich (St. Louis, MO). Acrylamide/Bis-acrylamide (30%, 37.5:1), electrophoresis grade sodium dodecyl sulfate (SDS), Bio-Rad protein assay dye reagent concentrate, and ammonium persulfate were purchased from Bio-Rad Laboratories (Hercules, CA). Restriction enzymes, T4 DNA ligase, Phusion DNA polymerase, Q5 DNA polymerase, T5 exonuclease, and Taq DNA ligase were purchased from New England Biolabs (Ipswich, MA). Deoxynucleotides (dNTPs) and Platinum Taq High-Fidelity polymerase (Pt Taq HF) were purchased from Invitrogen (Carlsbad, CA). PageRuler™ Plus prestained protein ladder was purchased from Fermentas (Glen Burnie, Maryland). Oligonucleotides were purchased from Integrated DNA Technologies (Coralville, IA), resuspended at a stock concentration of 100  $\mu$ M in 10 mM Tris-HCl, pH 8.5, and stored at either 4 °C for immediate use or -20 °C for longer term use. Amicon Ultra 10,000 centrifugal concentrators were purchased from EMD Millipore (Billerica, MA). cOmplete EDTA-free protease inhibitor was purchased from Roche Applied Science (Penzberg, Germany). TEV protease was purchased from the QB3 MacroLab at UC Berkeley. Amicon Ultra spin concentrators and MultiScreen<sub>HTS</sub> 0.22 $\mu$ m filter plates were purchased from Merck Millipore (Cork, Ireland). D-(+)-glucose was purchased from MP Biochemicals (Santa Ana, CA). 2,4-Pentandiol, 1,3-butanediol, and 4-hydroxy-2-butanone were purchased from Sigma-Aldrich (St. Louis, MO). DNA purification kits, Ni-NTA agarose, genomic DNA isolation, and RNeasy RNA isolation kit were purchased from Qiagen (Valencia, CA). Genome library prep Kapa Biosystem

Hyper Plus Kit was purchased from Kapa Biosystem (Wilmington, MA). Illumina TruSeq RNA Sample Prep Kit was purchased from Illumina (Hayward, CA).

**Bacterial strains.** *E. coli* DH10B was used for DNA construction and BL21(DE3) Star-T1<sup>R</sup> was used for heterologous production of proteins for purification. *E. coli* DH1 (ATCC 39936), DH1Δ5, BW25113Δ5-T1R, DH1Δ5\_2406\_pcnB(R149L), DH1Δ5\_2406\_rpoC(M466L), and DH1Δ5\_2406\_pcnB(R149L)\_rpoC(M466L) were used for production and evolution experiments. Genotypes are listed in *Table S1A*.

DH1Δ5 and BW25113Δ5-T1R were constructed with the lamda-red recombinase system [1]. The pKD3 template plasmid was used for gene disruption with subsequence recycling of the Cm<sup>R</sup> marker using the pCP20 plasmid. The following primers were used.

| Name       | Sequence                                                                   | Note                |
|------------|----------------------------------------------------------------------------|---------------------|
| adhE F1    | GCTTTGCAAAAATTTGATTTGGATCACGTAATCAGTACCC                                   | ΔadhE verification  |
| adhE R1    | CATGAGCAGAAAGCGTCAGGCAGTGTTGTATCCAC                                        | ΔadhE verification  |
| adhE KF1   | TAGTAGCTTAAATGTGATTCAACATCACTGGAGAAAGTCTTGTGTAG<br>GCTGGAGCTGCTTC          | ΔadhE               |
| adhE KR1   | ATCTGAATCAGCTCCCCTGGAATGCAGGGGAGCGGCAAGACATAT<br>GAATATCCTCCTTAG           | ΔadhE               |
| fabB KO F2 | ATTGTGCATTCGAAACTTACTCTATGTGCGACTTACAGAGGTATTGA<br>ATGGTGTAGGCTGGAGCTGCTTC | ΔfabB               |
| fabB KO R2 | GTAACGTCGGATGCGACGCTGGCGCGTCTACTCCGACCTACTGCG<br>AATTACATATGAATATCCTCCTTAG | ΔfabB               |
| frdBC KF1  | ATGGCTGAGATGAAAAACCTGAAAATTGAGGTGGTGCCTATAACG<br>TGTTAGGCTGGAGCTGCTTC      | ΔfrdBC [2]          |
| frdBC KR1  | TTACCAGTACAGGGCAACAAACAGGATTACGATGGTGGCAACCACC<br>ATATGAATATCCTCCTTAG      | ΔfrdBC [2]          |
| poxB KF1   | CAGATGAACTAACTTGTACCCTTATCACATTCAGGAGATGGAGAA<br>CCGTGTAGGCTGGAGCTGCTTC    | ΔpoxB from promoter |
| poxB KR1   | CATGGCATGTCCTTATTATGACGGGAAATGCCACCCTTATTCCGG<br>GGATCCGTCGACC             | ΔpoxB from promoter |
| poxB F1    | AGTGGTTTCCGGTGAATATACGGTGAGCAGCAC                                          | ΔpoxB verification  |
| poxB R1    | GTTCGCAGTGACTGAGCAGAGCGACCAGGT                                             | ΔpoxB verification  |
| poxB KF2   | AAACAAACGGTTGCAGCTTATATCGCCAAAACACTCGAATGTGTAG<br>GCTGGAGCTGCTTC           | ΔpoxB               |
| poxB KR2   | CCTTAGCCAGTTTGTTCGCCAGTTCGATCACTTCATCACATATGA<br>ATATCCTCCTTAG             | ΔpoxB               |

|          |                                                                            |                                 |
|----------|----------------------------------------------------------------------------|---------------------------------|
| ackA KF1 | GGCTCCCTGACGTTTTTTTAGCCACGTATCAATTATAGGTA<br>TCTCCG<br>TGTAGGCTGGAGCTGCTTC | $\Delta$ ackA-ptA from promoter |
| pta KR1  | CCGCAGCGCAAAGCTGCGGATGATGACGAGAATTCCGGGGATCCG<br>TCGACC                    | $\Delta$ ackA-ptA from promoter |
| ackA F1  | ATACCCACTATCAGGTATCCTTTAGCAGCCTGAAGGCC                                     | $\Delta$ ackA-ptA verification  |
| pta R1   | TCACCAACGTATCGGGCATTGCCCATCTTC                                             | $\Delta$ ackA-ptA verification  |
| ackA KF2 | ATGTCGAGTAAGTTAGTACTGGTTCTGAACTGCGGTAGTTCTTCAGT<br>GTAGGCTGGAGCTGCTTC      | $\Delta$ ackA [3]               |
| ackA KR2 | TCAGGCAGTCAGGCGGCTCGCGTCTTGCGCGATAACCAGTTCTTC<br>CATATGAATATCCTCCTTAG      | $\Delta$ ackA [3]               |
| pta KR2  | TGTGCAGACTGAATCGCAGTCAGCGCGATGGTGTAGACGACATATG<br>AATATCCTCCTTAG           | $\Delta$ ackA-ptA from promoter |
| ackA F2  | TTCAAAACATTTTGTCTTCCATACCCACTATCAGGTATCCTTTAGCA<br>GCCTGAAGGCCT            | $\Delta$ ackA-ptA verification  |
| pta R2   | TTGTTGGTTTGGATTTCAGTGATTGCGGACATAGCGCAAATATCCCT<br>TGCACAAAACAA            | $\Delta$ ackA-ptA verification  |

**Gene and plasmid construction.** Plasmid construction was carried out using standard molecular biology techniques using the Gibson protocol [4] and Golden Gate Assembly [5]. PCR amplifications were carried out with Q5 DNA polymerase or Phusion DNA polymerase, following manufacturer instructions. Primer sequences are listed in *Table S1B*. Constructs were verified by sequencing (Quintara Biosciences; Berkeley, CA). Synthetic genes were assembled using gBlock sequences (*Table S1D*). gBlocks were resuspended at 10 ng/ $\mu$ L in 10 mM Tris-HCl, pH 8.5 and used directly for assembly of vectors.

#### *Constructs for AdhE2 biochemical characterization*

*pCWori-strep.adhe2*. The synthetic gene for AdhE2 was amplified from pCWori-ter.adhE2 using the adhE2 F6 and adhE2 R1 and inserted into the NdeI-HindIII of pCWori.

*pCWori-strep.adhe2(C244A)*. The synthetic gene for AdhE2 was amplified by SOE-PCR with primers adhE2 F6/adhE2 R9 (5'-end), adhE2 F9/adhE2 R1 (3'-end) and inserted into the NdeI-HindIII site of pCWori.

*pCWori-strep.adhe2(H721A/H735A)*. The pCWori-strep.adhE2(H735A) cloning intermediate was made by SOE-PCR with adhE2 F6/adhE2 R9 (5'-end), adhE2 F9/adhE2 R1 (3'-end) and inserted into the NdeI-HindIII sites of pCWori. pCWori-strep.adhE2(H735A, H721A) was made by SOE-PCR amplified from pCWori-strep.adhE2(H735A) with adhE2 F6/adhE2 R11 (5'-end), adhE2 F11/adhE2 R1 (3'-end) and inserted into the NdeI-HindIII sites of pCWori.

*pCWori-strep.aldh* The sequence coding residues M1-N448 of the synthetic *adhE2* gene were amplified using primers adhE2 F6 and adhE2 AADH R1 from pCWori-ter.adhE2 and inserted into the NdeI-HindII site of pCWori.

### *Constructs for the front end of the pathway*

*pBT33-Bu1*. Contains the *phaA.phaB* operon driven by the  $P_{BAD}$  promoter and the *crt* gene driven by the  $P_{Trc}$  promoter in the pBAD33 backbone [6].

*pT5T33-phaA.phaB-crt*. Contains the *phaA.phaB* operon driven by the  $P_{T5}$  promoter and the *crt* gene driven by the  $P_{Trc}$  promoter in the pBAD33 backbone [6].

*pT533-phaA.phaB*. The oligos *trc.crt* delete GO1 and *trc.crt* delete GO2 were inserted into the XbaI restriction site of pT5T33-*phaA.phaB-crt* to remove the *crt* gene and generate pT533-*phaA.phaB*.

*pT533-phaA*. The *phaA* gene was amplified from pT533-*phaA.phaB* using primers *phaA* GF1 and *phaA* GR1 and inserted into pT533-*phaA.phaB* cut with NdeI and XbaI using Gibson assembly.

*pBT33-Bu2*. Contains the *phaA.hbd* operon driven by the  $P_{BAD}$  promoter and the *crt* gene driven by the  $P_{Trc}$  promoter in the pBAD33 backbone [6]

*pT5T33-phaA.hbd-crt*. Contains the *phaA.hbd* operon driven by the  $P_{T5}$  promoter and the *crt* gene driven by the  $P_{Trc}$  promoter in the pBAD33 backbone [6]

*pTT33-phaA.hbd-crt*. Contains the *phaA.hbd* operon driven by the  $P_{Trc}$  promoter and the *crt* gene driven by the  $P_{Trc}$  promoter in the pBAD33 backbone [6].

*pT533-phaA.hbd*. The oligos *trc.crt* delete GO1 and *trc.crt* delete GO2 were inserted into the XbaI restriction site of pT5T33-*phaA.HBD-crt* to remove the *crt* gene and generate pT533-*phaA.HBD*.

*pBT-0.03HBD*. This plasmid was made with the parent plasmid pBT33-Bu2 with the 30K RBS (CGACTACGGGTAATTCGGAACGACAGTCGCCCAA) in front of the *hbd* gene.

*pBT-0.3crt*. This plasmid was made with the parent plasmid pBT33-Bu2 with the 300K RBS (GAGTCGAGAGGCTGCACACAAGACAGACCGAGTC) in front of the *crt* gene.

### *PDHc overexpression*

*pBBR1-aceEF.lpd*. Contains the *aceEF-lpd* operon driven by the  $P_{Lac}$  promoter [6].

### *AdhE2 screening*

*pCDF3-ter.adhE2*. The pCDF3 cloning intermediate was constructed by QuickChange mutagenesis of pCDFDuet to modify the origin using CloDF13-cop3 QCF1/QCR1 primers. The Sp resistance marker and CloDF13cop3 origin were amplified using *aadA* CloDF F1/R1

primers and inserted into the Bsu36I and HindIII cut sites of pCWori-ter.adhE2 to replace the origin and resistance markers of pCWori.

*pCDF3-ter.adhE2.1-96*. AdhE2 variant containing plasmids (*Table S1.D1*) were constructed by Calysta Inc. (Menlo Park) using pCDF3-ter.adhE2 as the parent plasmid.

*pCDF3-ter.adhE29-45*. AdhE2 homologs containing plasmids (*Table S1.D2*) were constructed by Calysta Inc. (Menlo Park) using pCDF3-ter.adhE2 as the parent plasmid.

#### *ALDH screening*

*pCDF3-ter.aldh1-15,46*. Monofunctional ALDH containing plasmids were constructed by Calysta Inc. (Menlo Park) using pCDF3-ter.adhE2 as the parent plasmid. The *aldhX* gene (*Table S1.D3*) was inserted upstream of the ADH domain of AdhE2, separated by a stop codon, leaving some residual expression of the ADH domain.

*pCDF3-aldh1-15,46*. (*Table S1.B1*) The oligos ter delete GO5 and ter delete GO6 were inserted into the BamHI-EcoRI restriction sites of pCDF3-ter.aldh1-15,46 to remove the *ter* gene and generate pCDF3-aldh1-15,46.

*pCWori-ter.adhE2*. Contains the *ter.adhE2* operon driven by a double  $P_{Tac}$ . It also contains the *lacIq* gene [6].

*pCWori-ter-aldh46.adh*. The *aldh46* gene was amplified from pCDF3-ter.aldh46 using the *aldh46* GF3 and *aldh46*.ADH GR1 primers. The ADH domain of *adhE2* was amplified from pCWori-ter.adhE2 using primers *aldh46*.ADH GF1 and ADH GR1. The two amplicons were inserted into the EcoRI and HindIII cut pCWori-ter.adhE2 using Gibson assembly.

*pCWori.trc-ter-adhE2*. The *rrnB* terminator and  $P_{trc}$  promoter from pBT33-Bu2 was amplified with primers pCWoriTrc F1/R1 and inserted between the *ter* and *adhE2* genes at the EcoRI site of pCWori-ter.adhE2 using Gibson assembly.

*pCWori.trc-ter-aldh46.adh*. The *aldh46* gene was amplified from pCDF3-ter.aldh46 using primers *aldh* GF1 and *aldh46*.ADH GR1 primers. The sequence encoding the ADH domain of AdhE2 was amplified from pCWori-ter.adhE2 using primers *aldh46*.ADH GF1 and ADH GR1. The two amplicons were inserted into EcoRI and HindII digested pCWori.trc-ter-adhE2 using Gibson assembly.

#### *ADH screening:*

*pCWori.trc-ter-aldh46.adhX*. The cloning intermediate pCWori.trc-ter-aldh46 was constructed by Gibson assembly with the *aldh46.x* G1 gBlock and HindIII digested pCWori.trc-ter-

aldh46.adh. gBlocks containing *adh/dhaT* genes (Table S1.E1) were inserted into SpeI/XbaI digested pCWori.trc-ter-aldh46 using Gibson assembly.

#### *ALDH.ADH screening*

*ALDH.ADH (X.Y) combinations 3.12, 6.8, 7.2, 7.8, 7.12, 9.8, 9.12.* These plasmids were made by Gibson assembly using the pCWori.trc-ter-aldh46.adhY plasmid digested with EcoRI and XbaI to remove the *aldh46* gene and generate the backbone. Inserts were obtained by PCR amplification using primers aldhX GF2 and aldhX.adhY GR1 from pCDF3-aldhX. For the plasmid containing *aldh7.adh2*, the extra oligos aldh7.adh2 GO1 and aldh7.adh2 GO2 were also included to reinsert the 5' end of *adh2* removed by EcoRI digestion.

*ALDH.ADH (X.Y) combinations 3.2, 3.8, 6.2, 6.12, 9.2, 14.2, 14.12, 14.8.* These plasmids were constructed by Golden Gate assembly. *aldhX* was amplified with primers aldhX GGF1 and aldhX.(adhY) GGR1 from pCDF3-aldhX. *adhY* was amplified with (aldhX).adhY GGF1 and adhY GGR1 from pCWori.trc-ter-aldh46.adhY and inserted into pCWori.trc-ter-RFP digested with BsaI.

*ALDH.ADH combinations 3.15, 3.17, 3.18, 3.19, 3.21, 3.22, 7.15, 7.18, 7.19, 7.20, 7.21, 7.22, 46.19, 46.20, 46.21.* The appropriate *aldh* gene was amplified with primers aldh3 GGF1 or aldh round 1 library GGF1 and aldh3/7/46.(adh) GGR1 from pCDF3-aldh3/7/46 (see Table S1.B3). The *adh* gene was amplified with adh15-22 GGF1 and adh15-22 GGR1 from the appropriate gBlock (Table S1.E1). The *aldh* and *adh* genes were inserted into pCWori.trc-ter-RFP digested with BsaI via Golden Gate assembly.

*pCWori.trc-ter-RFP.* Prior to inserting the BsaI-RFP-BsaI Golden Gate cassette, two BsaI cut sites on the backbone of pCWori.trc-ter-aldh46.adh2 were removed. The first BsaI cut site in the *rrnB* terminator was removed by amplifying the regions of the *rrnB* terminator flanking the cut site with primers rrnB-1 GF1/GR1 and rnnB-2 GF1/GR1 and inserting into pCWori.trc-ter-aldh46.adh2 digested with XhoI and SfiI using Gibson assembly. The second BsaI site was removed by inserting oligos BsaI delete GO1 and BsaI delete GO2 into the BsaI cut site using Gibson assembly. The gene for RFP was amplified from pET28a(gg)-RFP with RFP BsaI GF2 and RFP BsaI GR2 and inserted into the BsaI removed pCWori.trc-ter-aldh46.adh2 cut with EcoRI and SpeI using Gibson assembly.

#### *sADH screening*

*pCWori.trc-sadhX-aldh7.adh2.* The *sadhX* gene was amplified from the corresponding gBlock (Table S1.E2) using primers sadhX GF1 and sadhX GR1 and inserted into pCWori.trc-ter-aldh7.adh2 cut with NdeI and XhoI.

*Constructs for chromosomal mutations.* The pCRISPR-Gibson1 plasmids were constructed to clone constructs with specific guide sequence to target the *E. coli* chromosome for introduction of point mutants. The parent plasmid, pCRISPR-Gibson1 (#2786), was generated from pCRISPR (Addgene 42875) to introduce cut sites between sgRNA promoter and the sgRNA to facilitate the use of Gibson assembly to introduce guide sequences for the target DNA. All guide sequences were generated using the Benchling CRISPR tool (see *Table SI.C* for guide sequences).

pCRISPR-PcnB2409 (#2784) was constructed by insertion of the annealed oligonucleotides, P1155 and P1156, and inserted into the XbaI-HindIII site of pCRISPR-Gibson1 using the Gibson protocol.

pCRISPR-RpoC2406 (#2794) was constructed by insertion of the annealed oligonucleotides, P1232 and P1233, and inserted into the XbaI-HindIII site of pCRISPR-Gibson1 using the Gibson protocol.

**Expression and purification of AdhE2 constructs.** TB (1 L) containing carbenicillin (50 µg/mL) in a 2.8 L Fernbach baffled shake flask was inoculated to  $OD_{600} = 0.05$  with an overnight TB culture of freshly transformed *E. coli* containing the appropriate overexpression plasmid. The cultures were grown at 37 °C at 200 rpm to  $OD_{600} = 0.6$  to 0.8 at which point cultures were cooled on ice for 20 min, followed by induction of protein expression with 1 mM IPTG and overnight growth at 16 °C. Cell pellets were harvested by centrifugation at  $9,800 \times g$  for 7 min and resuspended at 20 mL/L of culture with Buffer W (100 mM Tris-HCl, 150 mM sodium chloride, 1 mM EDTA, pH 8.0) supplemented with 2 mg/mL lysozyme and 2 µL/50 mL final volume Benzonase and frozen at -80 °C.

Frozen cell suspensions were thawed and frozen twice before finally thawing and adding 0.5 mM PMSF as a 50 mM stock solution in ethanol dropwise. The cell suspension was lysed with a Misonix 3000 probe sonicator at full power with a 15 second on, 60 second off cycle for a total sonication time of 2.5 min on ice. The lysate was centrifuged at  $15,300 \times g$  for 20 min at 4 °C to separate the soluble and insoluble fractions. DNA was precipitated in the soluble fraction by addition of 0.5% polyethylenimine as a 15% v/v stock solution added dropwise. The precipitated DNA was removed by centrifugation at  $15,300 \times g$  for 20 min at 4 °C. The lysate was loaded onto a Strep-tactin Superflow High Capacity column (IBA, 1 mL resin/L expression culture) by gravity flow. The column was washed with 20 column volumes Buffer W. The protein was then eluted with 2.5 mM desthiobiotin in Buffer W. Fractions containing ALDH protein by A280 were pooled and concentrated in an Amicon Ultra 10,000 MWCO concentrator. Concentrated protein was supplemented with glycerol to 10% v/v and stored at -80 °C.



**AdhE2 biochemical assays.** AdhE2 activity was measured using three different assays as described below.

*NADH oxidation assay.* Reactions were measured by monitoring the oxidation of NADH at 340 nm at 25 °C. The assay mixture (400  $\mu$ L in a 1 cm cuvette) contained 100  $\mu$ M NADH in 100 mM Tris, 1 mM DTT, pH 7.5. The reaction was initiated by the addition of substrate. Addition of either butyryl-CoA or acetyl-CoA monitored the additive reduction of the acyl-CoA substrate in the ALDH active and the aldehyde intermediate in the ADH active site. Addition of either butyraldehyde or acetaldehyde monitors solely the activity of the ADH domain.

*CPM free CoA release assay.* The activity of the ALDH domain was monitored by release of free CoA using the 7-diethylamino-3-(4'-maleimidylphenyl)-4-methylcoumarin (CPM) fluorescence-based thiol quantification assay [7] with butyryl-CoA or acetyl-CoA as a substrate. Assay conditions were the same as above except a final assay volume of 200  $\mu$ L was used and the reaction was initiated by substrate addition. The reaction of CPM with released free CoA was monitored by fluorescence with excitation at 405 nm and emission at 530 nm.  $k_{cat}$  and  $K_M$  were determined by fitting to initial rate data with Origin (OriginLab, Northampton, MA) using the equation:

$$v_0 = \frac{k_{cat}[S]}{K_M + [S]}$$

where  $v_0$  is the initial rate and  $[S]$  is the substrate concentration.

**ALDH domain phylogenetic analysis.** A literature search for ALDH domains of characterized substrate specificity was performed since our biochemical characterization suggested that this domain controls the overall selectivity of acyl-CoA reduction. The set of identified homologs consisted of three  $C_2$ -specific bifunctional AdhE2 homologs, four  $C_4$ -specific monofunctional ALDHs, and one atypical  $C_2$ -specific ALDH (*Figure S5A*). The sequences were all of bacterial origin except for an AdhE2 homolog identified from the protozoan parasite *Giardia intestinalis*. These sequences were then placed in a phylogenetic tree such that the branching pattern was biased by their characterized substrate preference. Next, the entire ALDH gene family was assembled into a second phylogenetic tree with the branching pattern again biased by the characterized substrate specificity from the first tree. The full family tree comprised of more than 1,200 sequences, of which approximately 33% were derived from bifunctional ALDH domains.

**Production of C<sub>4</sub> compounds in shake flasks.** Overnight cultures of freshly transformed *E. coli* strains were grown for 12–16 h in TB at 37 °C and used to inoculate TB (50 ml) with glucose replacing the standard glycerol supplement (1.5% (w/v) glucose for aerobic cultures and 2.5% (w/v) glucose for anaerobic cultures) and appropriate antibiotics to an optical density at 600 nm OD<sub>600</sub> of 0.05 in a 250 mL-baffled flask (Kimble Glass; Chicago, IL) or a 250 mL-baffled anaerobic flask with GL45 threaded top (Chemglass). The cultures were grown at 37 °C in a rotary shaker (200 rpm) and induced with IPTG (1.0 mM) at OD<sub>600</sub> = 0.35–0.45. The growth temperature was then reduced to 30 °C, and the culture flasks were sealed with Parafilm M (Pechiney Plastic Packaging) to prevent product evaporation for aerobic cultures. Anaerobic cultures were sealed and the headspace was sparged with argon for 3 min immediately follow induction. Aerobic cultures were unsealed for 10 to 30 min every 24 h then resealed with Parafilm M, and additional glucose (1% (w/v)) was added 1 day post-induction. Samples were quantified after 3 d of cell culture, unless otherwise noted. For cultures grown with an oleyl alcohol layer, cultures (40 mL) were grown at 37 °C for 3 h before induction with IPTG (1 mM). Oleyl alcohol (10 mL) was then added. Cultures were sealed and the headspace was sparged with argon for 3 min. At this time, the growth temperature was reduced to 30 °C. Cultures were grown for 5 d before harvesting. Both the aqueous and organic layers were reserved for quantification.

**Quantification of *n*-butanol titers.** Samples (2 mL) were removed from cell culture and cleared of biomass by centrifugation at  $20,817 \times g$  for 2 min using an Eppendorf 5417R centrifuge. The supernatant or cleared medium sample was then mixed in a 9:1 ratio with an aqueous solution containing the hexanol internal standard ( $10 \text{ g L}^{-1}$ ). These samples were then analyzed on a Trace GC Ultra (Thermo Scientific) using an HP-5MS column ( $0.25 \text{ mm} \times 30 \text{ m}$ ,  $0.25 \text{ }\mu\text{m}$  film thickness, J & W Scientific). The oven program was as follows: 75 °C for 3 min, ramp to 300 °C at  $45 \text{ }^\circ\text{C min}^{-1}$ , 300 °C for 1 min. Alcohols were quantified by flame ionization detection (FID) (flow:  $350 \text{ mL min}^{-1}$  air,  $35 \text{ mL min}^{-1}$  H<sub>2</sub> and  $30 \text{ mL min}^{-1}$  helium). Samples containing *n*-butanol levels below  $500 \text{ mg L}^{-1}$  were requantified after extraction of the cleared medium sample or standard ( $500 \text{ }\mu\text{L}$ ) with toluene ( $500 \text{ }\mu\text{L}$ ) containing the isobutanol internal standard ( $100 \text{ mg L}^{-1}$ ) using a Digital Vortex Mixer (Fisher) for 5 min set at 2,000. The organic layer was then quantified using the same GC parameters with a DSQII single-quadrupole mass spectrometer (Thermo Scientific) using single-ion monitoring ( $m/z$  41 and 56) concurrent with full scan mode ( $m/z$  35–80). Samples were quantified relative to a standard curve of 2, 4, 8, 16, 31, 63, 125, 250,  $500 \text{ mg L}^{-1}$  *n*-butanol for MS detection or 125, 250, 500, 1,000, 2,000, 4,000,  $8,000 \text{ mg L}^{-1}$  *n*-butanol/ethanol for FID detection. Standard curves were prepared freshly during each run and normalized for injection volume using the internal isobutanol standard (100 or

1,000 mg L<sup>-1</sup> for MS and FID, respectively). Standard curve was normalized for injection volume using the internal standard.

**Quantification of 1,3-butanediol (BDO) and 4-hydroxy-2-butanone (HB) titers.** Samples (2 mL) were removed from cell culture and cleared of biomass by centrifugation at  $20,817 \times g$  for 2 min using an Eppendorf 5417R centrifuge. The cleared medium samples, or standards prepared in TB medium, diluted 1:1000 into water, and filtered through a 0.22  $\mu\text{m}$  filter (EMD Millipore MSGVN2210). Supernatants were diluted 1- to 1,000-fold with water containing 2,4-pentanediol (10  $\mu\text{M}$ ) added as internal standard and analyzed on an Agilent 1290 HPLC using a Rezex ROA-Organic Acid H<sup>+</sup> (8%) column (150  $\times$  4.6 mm, Phenomenex) with isocratic elution (0.5% *v/v* formic acid, 0.6 mL min<sup>-1</sup>, 55 °C). Samples were detected with an Agilent 6460C triple quadrupole MS with Jet Stream ESI source, operating in positive MRM mode (*m/z* 91 $\rightarrow$ 73 transition; fragmentor, 50 V; collision energy, 0 V; cell accelerator voltage, 7 V; delta EMV, +400). Samples were quantified relative to a standard curve of 0.3125, 0.625, 1.25, 2.5, 5, 10 g L<sup>-1</sup> 1,3-butanediol and 4-hydroxy-2-butanone.

**Anaerobic growth competition and enrichment validation.** DH1 $\Delta$ 5 transformed with *n*-butanol production plasmids capable of a range of titers were mixed at various ratios and cultured anaerobically as described above. Flasks were sampled with a syringe to collect culture media supernatants for quantification of metabolites and to measure growth. Pelleted cells were used as template for qPCR of *n*-butanol plasmids to determine the relative abundance of different subpopulations and compared to a standard curve of purified plasmids. The qPCR reactions were performed using Bio-Rad Sybr-Green mastermix according to the manufacturer protocol, and OD-normalized boiled cell pellet was used as template.

**Adaptive evolution.** Host strains were transformed with appropriate synthetic pathways and plated on LB agar plate with appropriate antibiotics over night at 37 °C. Colonies were picked and grown in 5 ml TB media with 2.5% (*w/v*) glucose replaced with the standard glycerol carbon source overnight at 37 °C at 200 rpm. Overnight cultures were then inoculated to fresh 30 mL TB media with 2.5% glucose with initial OD<sub>600</sub> of 0.05 and grown at 37 °C at 200 rpm. Once cultures reached OD<sub>600</sub> ~0.3–0.4, cultures were induced with 1 mM IPTG and sparged with argon for 3 min. Growth temperature was then lowered to 30 °C. Cultures were then serially transferred to fresh media every 24–72 h to an initial OD<sub>600</sub> of 0.05 to approximate continuous growth with limited time spent in stationary phase. The growth time of 2472 h was chosen such that the cultures would be in late-log or early-stationary phase. Growth media was TB with 2.5% glucose, 1 mM IPTG, and appropriate antibiotics. Culture OD<sub>600</sub> was monitored daily and

cultures were transferred when the majority of cultures were in late log-phase growth, usually OD<sub>600</sub> 1.5–2.0. Culture supernatant samples (2 mL) were collected for metabolite quantification. All cultures were transferred simultaneously, the headspace was sparged with argon for 3 min, and growth was continued at 30 °C in a rotary shaker (200 rpm). Selections were continued (from three weeks or three months) until no improved strains were isolated from the culture. Final cultures were stored as 15% glycerol stocks at –80 °C in addition to being streaked on LB agar plates. Individual colonies were picked and cultured for metabolite production in TB to confirm butanediol, hydroxybutanone, and butanol production relative to wild type strains.

**Genome sequencing.** Cells were grown on 10 mL LB media with 2.5% (w/v) glucose with appropriate antibiotics overnight at 37 °C. Cells were then spun down at 8000 × g in a Beckman centrifuge. Cell pellets were then processed using the Qiagen Genomic DNA Isolation Kit according to manufacturer specifications. Genomic libraries were then prepared for sequencing using the Kapa Biosystem Hyper Plus Kit with no modifications to the standard protocol. For each library, 1 µg of genomic DNA was used with 3 µl of adapter (40 µM) per ligation. A double-sided selection to obtain 600 bp fragments was then performed using 0.55 vol of right and 0.6 vol of left Ampure XP beads (Beckman Coulter). No PCR amplification was carried out after the size selection. Libraries were sequenced at the UC Davis DNA Core Facility with PE300 sequencing using an Illumina MiSeq. Sequencing results were mapped against the *E. coli* genome (DH1- Accession ID: NC\_017625, BW25113 - Accession ID: NZ\_CP009273) and compared against reads obtained from our DH1Δ5 or BW25113Δ5 parent strain using Breseq v. 0.25d [8].

**Cell lysate enzyme assays.** Biomass was harvested at the end of production and stored at –80 °C. Frozen cell pellets (from 2 mL culture) were thawed and resuspended in 500 µL of 100 mM Tris-HCl pH 7.5 containing DTT (5 mM) and PMSF (0.5 mM).

*PhaA*. Thiolysis activity was measured by monitoring the enolate form of acetoacetyl CoA as previously described [9]. Assays were performed at 30 °C in a 96 well plate in a total volume of 100 µL containing 100 mM Tris-HCl, pH 7.5, 10 mM MgCl<sub>2</sub>, 1 mM DTT, 10 µM CoA, and 20 µM acetoacetyl CoA.

*Hbd*, *Ter*, *Aldh*, and *Adh* activities were assayed as described [6]. Briefly, all assays were performed at 30 °C in a 96 well plate in a total volume of 100 µL. The mixture for the Hbd assays contained 100 mM Tris-HCl, pH 7.5, 100 µM acetoacetyl CoA, 100 µM NADH. The Hbd activity was monitored by the oxidation of NADH at 340 nm. The mixture for the Ter

assays contained 100 mM Tris-HCl, pH 7.5, 100  $\mu$ M NADH, and 50  $\mu$ M crotonyl CoA. The Ter activity was monitored by the oxidation of NADH at 340 nm. The mixture to assay the aldehyde domain of AdhE2 assays contained 100 mM Tris-HCl, pH 7.5, 0.5 mM DTT, 400  $\mu$ M NAD<sup>+</sup>, 400  $\mu$ M CoA, and 10 mM butyraldehyde. The activity of the aldehyde domain was monitored by the reduction of NAD<sup>+</sup> at 340 nm. The mixture to assay the alcohol domain of AdhE2 contained 100 mM Tris-HCl, pH 7.5, 0.5 mM DTT, 400  $\mu$ M NADH, and 10 mM butyraldehyde. The activity of the alcohol domain was monitored by the oxidation of NADH at 340 nm.

**RNA sequencing and analysis.** Cells with synthetic pathways were harvested after 24 h post induction with IPTG for RNA isolation. RNA was isolated using the RNeasy RNA isolation kit (Qiagen). In house rRNA removal method was used to remove rRNA before sequencing. 5  $\mu$ g of total RNA was treated with 4.5  $\mu$ L of TURBO DNase (ThermoFischer) in a 50  $\mu$ L reaction including 5  $\mu$ L of 10 $\times$  buffer to remove genomic DNA. The reaction was incubated at 37  $^{\circ}$ C for 30 min. The reaction was diluted with 100  $\mu$ L of Buffer RLT and 200  $\mu$ L of 70% ethanol and transferred to an RNeasy column (Qiagen) for RNA cleanup following the manufacture instructions. 1  $\mu$ g of DNase treated RNA was combined with 1  $\mu$ L of 0.5  $\mu$ M DNA probes (see *Table S1E*) with Hybridization buffer (200 mM NaCl, 100 mM Tris-HCl pH 7.5) up to 20  $\mu$ L. Hybridization of oligos occurred by holding at 95  $^{\circ}$ C for 2 min, followed by a gradient to 45  $^{\circ}$ C at  $-0.1$   $^{\circ}$ C/s. 5U of RNase H (Epicentre) in 2.5  $\mu$ L of 10 $\times$  Digestion buffer (0.5 M Tris-HCl pH 7.5, 1 M NaCl, 200 mM MgCl<sub>2</sub>) were added, and the resulting mixture was incubated at 45  $^{\circ}$ C for 30 min. Following cleanup with the Qiagen RNeasy Kit, the sample was treated with 3 U of TURBO DNase. Finally, the Qiagen RNeasy Kit was used to clean up samples one last time before RNA-Seq library prep. RNA-Seq libraries were prepared using the Illumina TruSeq RNA Sample Prep Kit. Samples were sequenced with Illumina HiSeq4000 at UC Davis DNA core. Reads were mapped using the Kallisto [10] and Sleuth [11]. Functional enrichment analysis of differentially expressed genes is based on clusters of orthologous groups (COG) categories provided by the IMG-ER annotations [12]. GO enrichment analysis of differentially expressed genes was performed via PantherDB [13,14].

**Generation of chromosomal point mutations.** Point mutations were made using the CRISPR Cas9 system [15,16]. Briefly, cells were transformed with the pKD46-Cas9-RecA-Cure, which allows for the expression of the Cas9 protein for double stranded DNA breaks and the RecA protein to assist homologous recombination. A single transformant was picked and inoculated in liquid culture to make electro-competent cells. Then cells that carried the pKD46-Cas9-RecA-Cure plasmid were transformed with both the pCRISPR plasmid containing the specific guide

RNA and the double stranded DNA repair fragment that carried the desired sequence. The repair fragment also carries a silent mutation to remove the PAM site and a phosphatooate modification at both the 5'- and 3'-ends. Transformations were recovered and plated on plates with appropriate selection markers. Colonies were validated by Sanger sequencing.

DH1Δ5 \_2406\_pcnB(R149L) - CGC → CTC mutation at position 446 that corresponds to the *pcnB*(R149L) mutation was made in the strain DH1Δ5 using the CRISPR Cas9 system. DH1Δ5 was transformed with pKD46-Cas9-RecA-Cure and plated on appropriate antibiotic resistant LB agar plate and incubated at 30 °C overnight. A single colony was picked and inoculated in 10 mL LB liquid media with appropriate antibiotics overnight at 30 °C. The overnight culture was then diluted in fresh LB media with 0.2% w/v of arabinose to an OD<sub>600</sub> ~ 0.01 to induce RecA expression. Once cultures reached an OD<sub>600</sub> of 0.4, cells were harvested to make electro-competent cells. DH1\_ pKD46-Cas9-RecA-Cure electro-competent cells were then transformed with pCRISPR\_gibson\_1guide\_2409pcnB (#2784) plasmid and repair fragments (P1227\_2406\_pcnB RF\_R and P1226\_2406\_pcnB RF\_F). Cells were recovered at 30 °C for 1.5 h and plated on appropriate antibiotic selection LB agar plate. Plate was incubated at 30 °C overnight. Colonies were picked and validated by Sanger sequencing (Quintara Biosciences). Once sequences were confirmed, a single colony was inoculated in 10 mL LB media with 0.05 mM IPTG to induce the guide to target and cure the pCRISPR\_gibson\_1guide\_2409pcnB (#2784) plasmid. Once the pCRISPR\_gibson\_1guide\_2409pcnB (#2784) plasmid was cured, cells were grown at 37 °C to cure the pKD46-Cas9-RecA-Cure plasmid, which contains a temperature sensitive origin of replication.

DH1Δ5 \_2406\_rpoC(M466L) – ATG → CTG mutation at position 1396 that corresponds to the *rpoC*(M466L) mutation was made in the strain DH1Δ5 using the CRISPR Cas9 system as described above. The pCRISPR\_gibson\_1guide\_2406\_rpoC (#2794) plasmid and repair fragments (P1231\_2406\_rpoC\_RF\_R and P1230\_2406\_rpoC\_RF\_F) were used.

DH1Δ5 \_2406\_pcnB(R149L)\_rpoC(M466L) – the double mutant was made using the CRISPR Cas9 system as described above in a sequential manner. Once the *pcnB*(R149L) mutation was confirmed and the pCRISPR\_gibson\_1guide\_2409pcnB (#2784) plasmid was cured, cells were grown up to make electro-competent cells. Cells were then transformed with the pCRISPR\_gibson\_1guide\_2406\_rpoC (#2794) construct and repair fragments (P1231\_2406\_rpoC\_RF\_R and P1230\_2406\_rpoC\_RF\_F). Once the desired mutations were confirmed with sequencing, cells were growing in IPTG-containing media to cure the

pCRISPR\_gibson\_1guide\_2406\_rpoC (#2794) plasmid. Finally, cells were grown at 37 °C to cure the pKD46-Cas9-RecA-Cure plasmid, which contains a temperature sensitive origin of replication.

**Metabolomics.** Five replicates of cultures were grown as described previously for production in shake flasks and harvested 24 h after induction. Cultures were centrifuged at  $20,817 \times g$  for 1 min at 4 °C with an Eppendorf 5417R Centrifuge (Hamburg, Germany). The supernatants were decanted immediately and cell pellets were flash frozen with liquid nitrogen and stored at -80 °C until extraction. Pellets were extracted with 90% v/v methanol with 0.1% v/v formic acid containing D<sub>3</sub><sup>15</sup>N-serine (0.01 mg/mL; Cambridge Isotope Laboratories, Inc., DNLM6863) to a final concentration of 1 mg biomass/μL of extraction buffer. The mass of the biomass was calculated using the standard value for *E. coli* of 23.8 mg/OD<sub>600</sub>. Samples were vortexed for 15 s, incubated at -80 °C for 30 min, and then thawed at -20 °C for 30 min. The vortex-freeze-thaw cycle was repeated for a total of five times. At the end of this procedure, the lysed cells were centrifuged at  $20,817 \times g$  at 4 °C for 5 min and the supernatant collected for LC-MS/MS analysis. Metabolomic analyses were performed as previously reported [15]. Briefly, supernatant was collected and frozen at -80 °C until analysis. 20 μL of supernatant was analyzed by single-reaction monitoring (SRM)-based targeted LC-MS/MS. Metabolite separation was performed using normal-phase chromatography using a Luna-5 mm NH<sub>2</sub> column (50 mm × 4.60 mm, Phenomenex). Mobile phases were run as follows: Buffer A, acetonitrile; Buffer B, 95:5 water/acetonitrile with 0.1% formic acid or 0.2% ammonium hydroxide with 50 mM ammonium acetate for positive and negative ionization modes, respectively. Flow rate began at 0.2 mL/min for 2 min, followed by a gradient starting at 0 %B and increasing linearly to 100 %B over the course of 13 min with a flow rate of 0.7 mL/min, followed by an isocratic gradient of 100 %B for 10 min before equilibrating for 5 min at 0 %B with a flow rate of 0.7 mL/min. MS analysis was performed using an electrospray ionization (ESI) source on an Agilent 6430 QQQ LC-MS/MS. Drying gas temperature 350 °C, drying gas flow rate was 10 L/min, the nebulizer pressure was 35 psi, capillary voltage was 3.0 kV, and fragmentor voltage was 100 V. Representative metabolites were quantified by SRM of the transitions from precursor to product ions at associated collision energies. Data was analyzed using Agilent Qualitative Analysis software by calculating area under the curve.

## Tables and Figures

**Table S1.** Strains, oligonucleotides, and sequences. (A) *E. coli* strains. (B) Plasmids and gene sequences (C). Oligos for sequencing and cloning (D) aldehyde dehydrogenases sequences. (E) gBlock sequences. (F) Sequence for DNA probes for rRNA depletion. (G) Open reading frame for *pcnB* and *rpoC*

### A. *E. coli* strains

#### A1. Parent and constructed strains

| Organism       | Name                                   | Description                                                                                                                                                                                    | Source     |
|----------------|----------------------------------------|------------------------------------------------------------------------------------------------------------------------------------------------------------------------------------------------|------------|
| <i>E. coli</i> | DH10B                                  | F- endA1 recA1 galE15 galK16 nupG rpsL ΔlacX74 Φ80lacZΔM15 araD139 Δ(ara,leu)7697 mcrA Δ(mrr-hsdRMS-mcrBC) λ-                                                                                  | Invitrogen |
| <i>E. coli</i> | BL21 (DE3) Star T1 <sup>R</sup>        | RNaseE mutation to increase mRNA stability, Δ <i>fhuA</i>                                                                                                                                      | Invitrogen |
| <i>E. coli</i> | DH1Δ5                                  | DH1 Δ <i>ackA-pta</i> Δ <i>adhE</i> Δ <i>ldhA</i> Δ <i>poxB</i> Δ <i>frdBC</i>                                                                                                                 | This study |
| <i>E. coli</i> | BW25113Δ5-T1 <sup>R</sup>              | BW25113 Δ <i>ackA-pta</i> Δ <i>adhE</i> Δ <i>ldhA</i> Δ <i>poxB</i> Δ <i>frdBC</i> Δ <i>fhuA</i> , P1 transduced <i>fhuA</i> :Km <sup>R</sup> from 1637 parent to 1435 then recycled Km marker | This study |
| <i>E. coli</i> | DH1Δ5_2406_pcnB(R149L)                 | DH1 Δ <i>ackA-pta</i> Δ <i>adhE</i> Δ <i>ldhA</i> Δ <i>poxB</i> Δ <i>frdBC</i> <i>pcnB</i> (R19L)                                                                                              | This study |
| <i>E. coli</i> | DH1Δ5_2406_rpoC(M466L)                 | DH1 Δ <i>ackA-pta</i> Δ <i>adhE</i> Δ <i>ldhA</i> Δ <i>poxB</i> Δ <i>frdBC</i> <i>rpoC</i> (M466L)                                                                                             | This study |
| <i>E. coli</i> | DH1Δ5_2406_pcnB(R149L)_<br>rpoC(M466L) | DH1 Δ <i>ackA-pta</i> Δ <i>adhE</i> Δ <i>ldhA</i> Δ <i>poxB</i> Δ <i>frdBC</i> <i>pcnB</i> (R19L) <i>rpoC</i> (M466L)                                                                          | This study |

A2. Strains isolated from evolutions. All strains contained the pBBR1-AceEF.Lpd plasmid (#339) for overexpression of the pyruvate dehydrogenase complex. Parent strains for *n*-butanol production contained the pT5T33-Bu2 plasmid (#499) and one of the following three plasmids: pCWori.trc-ter-aldh46.adh2 (#1866), pCWori.trc-ter-aldh46.adh8 (#1867), or pCWori.trc-aldh21.adh2 (#2456). The parent strain for HB production contained the pT533-phaA (#2080) and pCWori.trc-aldh7.adh2 (#2076) plasmids. The parent strain for BDO production contained the pT533-phaA.phaB (#1319) plasmid and one of the following three plasmids: pCWori.trc-aldh7.adh2 (#2076), pCWori.trc-aldh3.adh22 (#2468), or pCWori.trc-sadh1-aldh7.adh2 (#2430).



An identifier number was used during isolation of individual clones from an evolution experiment consisting of plasmid combination (A, B, C, D), flask number-dilution number-clone.

| Product           | Parent       | Plasmids      | Media              | Identifier | No.  |
|-------------------|--------------|---------------|--------------------|------------|------|
| <i>n</i> -Butanol | DH1Δ5        | 339-499-1866  | LB/2.5% Glc        | A1-D45-2   | 2616 |
|                   | DH1Δ5        | 339-499-1866  | LB/2.5% Glc        | A3-D26-2   | 2619 |
|                   | DH1Δ5        | 339-499-1866  | LB/2.5% Glc        | A3-D26-3   | 2620 |
|                   | DH1Δ5        | 339-499-1866  | LB/2.5% Glc        | A3-D35-1   | 2621 |
|                   | DH1Δ5        | 339-499-1866  | LB/2.5% Glc        | A3-D35-2   | 2622 |
|                   | DH1Δ5        | 339-499-2456  | LB/2.5% Glc        | C1-D41-1   | 2625 |
|                   | DH1Δ5        | 339-499-2456  | LB/2.5% Glc        | C1-D41-3   | 2626 |
|                   | DH1Δ5        | 339-499-2456  | LB/2.5% Glc        | C3-D35-1   | 2628 |
|                   | DH1Δ5        | 339-499-2456  | LB/2.5% Glc        | C3-D41-1   | 2629 |
|                   | DH1Δ5        | 339-499-2456  | LB/2.5% Glc        | C3-D41-6   | 2630 |
|                   | DH1Δ5        | 339-499-2456  | M9/10% LB/2.5% Glc | D15-12-1   | 2685 |
|                   | DH1Δ5        | 339-499-2456  | M9/10% LB/2.5% Glc | D15-12-2   | 2686 |
|                   | DH1Δ5        | 339-499-2456  | M9/10% LB/2.5% Glc | D15-12-3   | 2687 |
|                   | BW25113Δ5    | 339-499-2456  | M9/10% LB/2.5% Glc | C1-D4-3    | 2726 |
|                   | BW25113Δ5    | 339-499-2456  | M9/10% LB/2.5% Glc | D4-C3-3    | 2727 |
|                   | BW25113Δ5    | 339-499-1866  | M9/10% LB/2.5% Glc | D17-A3-1   | 2728 |
|                   | BW25113Δ5    | 339-499-1867  | M9/10% LB/2.5% Glc | D17-B3-1   | 2729 |
|                   | BW25113Δ5    | 339-499-2456  | M9/10% LB/2.5% Glc | D17-C1-3   | 2730 |
|                   | BW25113Δ5    | 339-499-2456  | M9/10% LB/2.5% Glc | D17-C3-2   | 2731 |
|                   | BW25113Δ5    | 339-499-2456  | M9/2.5% Glc        | C1-D9-1    | 2748 |
| DH1Δ5             | 339-499-2456 | M9/2.5% Glc   | C1-D11-2           | 2750       |      |
| HB                | DH1Δ5        | 339-2080-2076 | TB/2.5% Glc        | A3-D17-4   | 2403 |
|                   | DH1Δ5        | 339-2080-2076 | TB/2.5% Glc        | A3-D26-2   | 2404 |
| BDO               | DH1Δ5        | 339-1319-2076 | TB/2.5% Glc        | B1-D17-2   | 2405 |
|                   | DH1Δ5        | 339-1319-2076 | TB/2.5% Glc        | B1-D26-3   | 2406 |
|                   | DH1Δ5        | 339-1319-2076 | TB/2.5% Glc        | B3-D26-4   | 2407 |
|                   | DH1Δ5        | 339-1319-2430 | TB/2.5% Glc        | C1-D17-4   | 2408 |
|                   | DH1Δ5        | 339-1319-2430 | TB/2.5% Glc        | C3-D17-3   | 2409 |
|                   | DH1Δ5        | 339-1319-2430 | TB/2.5% Glc        | C2-D26-1   | 2410 |
|                   | DH1Δ5        | 339-1319-2430 | TB/2.5% Glc        | C3-D26-2   | 2411 |
|                   | DH1Δ5        | 339-1319-2468 | TB/2.5% Glc        | D3-D17-2   | 2412 |

## B. Plasmids

*B1. Monofunctional ALDHs (BDO).* All constructs were constructed using pCDF3-ter.adhE2 as the parent using Gibson assembly. pCDF3-ter.adhE2 contains the *ter* gene driven by two  $P_{tac}$  promoters, the Sp resistant marker, and the CloDF13cop3 origin. This backbone plasmid was digested with EcoRI and HindIII for *aldhX* insertion. The *aldhX* gene was inserted upstream of the ADH domain of AdhE2, separated by a stop codon, leaving some residual expression of the ADH domain. The pCDF3-ter.aldhX plasmids were used to screen for *n*-butanol production. A second set of plasmids, pCDF3-aldhX, was generated without the *ter* gene to screen for BDO

and HB production and are listed below. The oligos *ter* delete GO5 and *ter* delete GO6 were inserted into the BamHI-EcoRI restriction sites of pCDF3-*ter*.aldhX to remove the *ter* gene and generate pCDF3-aldhX.

| Name        | Marker | Origin      | Promoter            | Description                                                                                                                                                                                                 | Number |
|-------------|--------|-------------|---------------------|-------------------------------------------------------------------------------------------------------------------------------------------------------------------------------------------------------------|--------|
| pCDF3-aldh1 | Sp     | CloDF13cop3 | double<br>$P_{Tac}$ | Codon-optimized coenzyme A acylating aldehyde dehydrogenase <i>Clostridium beijerinckii</i> , from Calysta Biosystems, contains unannotated C-terminal adhE2 fragment after ald1, GI:4884855                | 1647   |
| pCDF3-aldh2 | Sp     | CloDF13cop3 | double<br>$P_{Tac}$ | Codon-optimized ethanolamine utilization protein EutE <i>Escherichia coli</i> CFT073, from Calysta Biosystems, contains unannotated C-terminal adhE2 fragment after ald2, GI:26250354                       | 1648   |
| pCDF3-aldh3 | Sp     | CloDF13cop3 | double<br>$P_{Tac}$ | Codon-optimized butyraldehyde dehydrogenase from <i>Clostridium saccharoperbutylacetonicum</i> N1-4(HMT), from Calysta Biosystems, contains unannotated C-terminal adhE2 fragment after ald3, GI:31075383   | 1649   |
| pCDF3-aldh4 | Sp     | CloDF13cop3 | double<br>$P_{Tac}$ | Codon-optimized ethanolamine utilization protein eutE <i>Vibrio shilonii</i> AK1, from Calysta Biosystems, contains unannotated C-terminal adhE2 fragment after ald4, GI:149190407                          | 1650   |
| pCDF3-aldh5 | Sp     | CloDF13cop3 | double<br>$P_{Tac}$ | Codon-optimized hypothetical protein RUMGNA_01022 from <i>Ruminococcus gnavus</i> ATCC 29149, from Calysta Biosystems, contains unannotated C-terminal adhE2 fragment after ald5, GI:154503198              | 1651   |
| pCDF3-aldh6 | Sp     | CloDF13cop3 | double<br>$P_{Tac}$ | Codon-optimized hypothetical protein CLOBOL_07248 from <i>Clostridium bolteae</i> ATCC BAA-613, from Calysta Biosystems, contains unannotated C-terminal adhE2 fragment after ald6, GI:160942363            | 1652   |
| pCDF3-aldh7 | Sp     | CloDF13cop3 | double<br>$P_{Tac}$ | Codon-optimized ethanolamine utilization protein EutE from <i>Clostridium botulinum</i> B str. Eklund 17B, from Calysta Biosystems, contains unannotated C-terminal adhE2 fragment after ald7, GI:187934965 | 1653   |
| pCDF3-aldh8 | Sp     | CloDF13cop3 | double<br>$P_{Tac}$ | Codon-optimized coenzyme A acylating aldehyde dehydrogenase from <i>Clostridium saccharobutylicum</i> ,                                                                                                     | 1654   |

|              |    |             |                     |                                                                                                                                                                                                                            |      |
|--------------|----|-------------|---------------------|----------------------------------------------------------------------------------------------------------------------------------------------------------------------------------------------------------------------------|------|
|              |    |             |                     | from Calysta Biosystems, contains unannotated C-terminal adhE2 fragment after aldH8, GI:189310620                                                                                                                          |      |
| pCDF3-aldh9  | Sp | CloDF13cop3 | double<br>$P_{Tac}$ | Codon-optimized ethanolamine utilization protein EutE from <i>Clostridium botulinum</i> E1 str. 'BoNT E Beluga', from Calysta Biosystems, contains unannotated C-terminal adhE2 fragment after aldH9, GI:251780016         | 1655 |
| pCDF3-aldh10 | Sp | CloDF13cop3 | double<br>$P_{Tac}$ | Codon-optimized aldehyde dehydrogenase from <i>Clostridium carboxidivorans</i> P7, from Calysta Biosystems, contains unannotated C-terminal adhE2 fragment after aldH10, GI:255526882                                      | 1656 |
| pCDF3-aldh11 | Sp | CloDF13cop3 | double<br>$P_{Tac}$ | Codon-optimized aldehyde dehydrogenase from <i>Clostridium saccharolyticum</i> WM1, from Calysta Biosystems, contains unannotated C-terminal adhE2 fragment after aldH11, GI:302386203                                     | 1657 |
| pCDF3-aldh12 | Sp | CloDF13cop3 | double<br>$P_{Tac}$ | Codon-optimized aldehyde dehydrogenase from <i>Geobacillus</i> sp. Y4.1MC1, from Calysta Biosystems, contains unannotated C-terminal adhE2 fragment after aldH12, GI:312110932                                             | 1658 |
| pCDF3-aldh13 | Sp | CloDF13cop3 | double<br>$P_{Tac}$ | Codon-optimized acetaldehyde dehydrogenase (acetylating) from <i>Clostridium</i> sp. DL-VIII, from Calysta Biosystems, contains unannotated C-terminal adhE2 fragment after aldH13, GI:359413662                           | 1659 |
| pCDF3-aldh14 | Sp | CloDF13cop3 | double<br>$P_{Tac}$ | Codon-optimized hypothetical protein HMPREF9942_01197 from <i>Fusobacterium nucleatum</i> subsp. <i>animalis</i> F0419, from Calysta Biosystems, contains unannotated C-terminal adhE2 fragment after aldH14, GI:371960349 | 1660 |
| pCDF3-aldh15 | Sp | CloDF13cop3 | double<br>$P_{Tac}$ | Codon-optimized hypothetical protein HMPREF0402_00608 from <i>Fusobacterium</i> sp. 12_1B, from Calysta Biosystems, contains unannotated C-terminal adhE2 fragment after aldH15, GI:373496187                              | 1661 |
| pCDF3-aldh46 | Sp | CloDF13cop3 | double<br>$P_{Tac}$ | Codon-optimized aldehyde dehydrogenase from <i>Clostridium beijerinckii</i> NCIMB 8052, from Calysta Biosystems, contains unannotated C-terminal adhE2 fragment after aldH46, GI:150018649                                 | 1662 |

B2. Primary ADH screening (*n*-butanol). pCWori.trc-ter-aldh46 was constructed as a parent plasmid for the construction of the pCWori.trc-ter-aldh46.ADH series of constructs. pCWori.trc-ter-aldh46 was constructed by Gibson assembly with the aldh46.x G1 gBlock and HindIII digested pCWori-ter-trc.aldh46.adh. pCWori.trc-ter-aldh46 contains the *ter* gene driven by two  $P_{Tac}$  promoters, the *aldh46* gene driven by the  $P_{Trc}$  promoter, the Cb resistance marker, and the ColE1 origin. pCWori.trc-ter-aldh46 was then digested with SpeI and XbaI for the insertion of corresponding ADHs. All ADHs were synthesized on gBlocks along with the appropriate overhang sequences for Gibson assembly.

| Name                       | Marker | Origin | Promoter                     | Description                                                                                                                                                                                                                                                   | Number |
|----------------------------|--------|--------|------------------------------|---------------------------------------------------------------------------------------------------------------------------------------------------------------------------------------------------------------------------------------------------------------|--------|
| pCWori.trc-ter-aldh46.adh2 | Cb     | ColE1  | double $P_{Tac}$ , $P_{Trc}$ | Codon-optimized Ter from <i>Treponema denticola</i> under double tac promoter, codon-optimized ALDH from <i>Clostridium beijerinckii</i> NCIMB 8052 in operon with ADH from <i>Campylobacter fetus</i> subsp. <i>fetus</i> (strain 82-40) under Trc promoter  | 1866   |
| pCWori.trc-ter-aldh46.adh3 | Cb     | ColE1  | double $P_{Tac}$ , $P_{Trc}$ | Codon-optimized Ter from <i>Treponema denticola</i> under double tac promoter, codon-optimized ALDH from <i>Clostridium beijerinckii</i> NCIMB 8052 in operon with codon-optimized ADH from <i>Olsenella</i> sp. oral taxon 809 str. F0356 under Trc promoter | 1911   |
| pCWori.trc-ter-aldh46.adh4 | Cb     | ColE1  | double $P_{Tac}$ , $P_{Trc}$ | Codon-optimized Ter from <i>Treponema denticola</i> under double tac promoter, codon-optimized ALDH from <i>Clostridium beijerinckii</i> NCIMB 8052 in operon with codon-optimized ADH from <i>Anaerofustis stercorihominis</i> DSM 17244 under Trc promoter  | 1912   |
| pCWori.trc-ter-aldh46.adh5 | Cb     | ColE1  | double $P_{Tac}$ , $P_{Trc}$ | Codon-optimized Ter from <i>Treponema denticola</i> under double tac promoter, codon-optimized ALDH from <i>Clostridium beijerinckii</i> NCIMB 8052 in operon with codon-optimized ADH from <i>Bacillus subtilis</i> (strain 168) under Trc promoter          | 1917   |

|                             |    |       |                              |                                                                                                                                                                                                                                                                               |      |
|-----------------------------|----|-------|------------------------------|-------------------------------------------------------------------------------------------------------------------------------------------------------------------------------------------------------------------------------------------------------------------------------|------|
| pCWori.trc-ter-aldh46.adh6  | Cb | ColE1 | double $P_{Tac}$ , $P_{Trc}$ | Codon-optimized Ter from <i>Treponema denticola</i> under double tac promoter, codon-optimized ALDH from <i>Clostridium beijerinckii</i> NCIMB 8052 in operon with codon-optimized ADH from <i>Faecalibacterium prausnitzii</i> M21/2 under Trc promoter                      | 1918 |
| pCWori.trc-ter-aldh46.adh7  | Cb | ColE1 | double $P_{Tac}$ , $P_{Trc}$ | Codon-optimized Ter from <i>Treponema denticola</i> under double tac promoter, codon-optimized ALDH from <i>Clostridium beijerinckii</i> NCIMB 8052 in operon with codon-optimized ADH from <i>Erysipelotrichaceae bacterium 3_1_53</i> under Trc promoter                    | 1919 |
| pCWori.trc-ter-aldh46.adh8  | Cb | ColE1 | double $P_{Tac}$ , $P_{Trc}$ | Codon-optimized Ter from <i>Treponema denticola</i> under double tac promoter, codon-optimized ALDH from <i>Clostridium beijerinckii</i> NCIMB 8052 in operon with codon-optimized ADH from <i>Olsenella uli</i> (strain ATCC 49627) under Trc promoter                       | 1913 |
| pCWori.trc-ter-aldh46.adh9  | Cb | ColE1 | double $P_{Tac}$ , $P_{Trc}$ | Codon-optimized Ter from <i>Treponema denticola</i> under double tac promoter, codon-optimized ALDH from <i>Clostridium beijerinckii</i> NCIMB 8052 in operon with codon-optimized ADH from <i>Streptococcus gallolyticus</i> (strain ATCC 43143 / F-1867) under Trc promoter | 1914 |
| pCWori.trc-ter-aldh46.adh10 | Cb | ColE1 | double $P_{Tac}$ , $P_{Trc}$ | Codon-optimized Ter from <i>Treponema denticola</i> under double tac promoter, codon-optimized ALDH from <i>Clostridium beijerinckii</i> NCIMB 8052 in operon with codon-optimized ADH from <i>Desulfurispirillum indicum</i> (strain ATCC BAA-1389 / S5) under Trc promoter  | 1920 |
| pCWori.trc-ter-aldh46.adh12 | Cb | ColE1 | double $P_{Tac}$ , $P_{Trc}$ | Codon-optimized Ter from <i>Treponema denticola</i> under double tac promoter, codon-optimized ALDH from <i>Clostridium beijerinckii</i> NCIMB 8052 in operon with codon-optimized ADH from <i>Clostridium spiroforme</i> DSM                                                 | 1921 |

|                             |    |       |                              |                                                                                                                                                                                                                                                                                                                |      |
|-----------------------------|----|-------|------------------------------|----------------------------------------------------------------------------------------------------------------------------------------------------------------------------------------------------------------------------------------------------------------------------------------------------------------|------|
|                             |    |       |                              | 1552 under Trc promoter                                                                                                                                                                                                                                                                                        |      |
| pCWori.trc-ter-aldh46.adh13 | Cb | ColE1 | double $P_{Tac}$ , $P_{Trc}$ | Codon-optimized Ter from <i>Treponema denticola</i> under double tac promoter, codon-optimized ALDH from <i>Clostridium beijerinckii</i> NCIMB 8052 in operon with codon-optimized ADH from <i>Tetragenococcus halophilus</i> (strain DSM 20338) under Trc promoter                                            | 1915 |
| pCWori.trc-ter-aldh46.adh14 | Cb | ColE1 | double $P_{Tac}$ , $P_{Trc}$ | Codon-optimized Ter from <i>Treponema denticola</i> under double tac promoter, codon-optimized ALDH from <i>Clostridium beijerinckii</i> NCIMB 8052 in operon with codon-optimized ADH from <i>Succinatimonas hippei</i> YIT 12066 under Trc promoter                                                          | 1906 |
| pCWori.trc-ter-aldh46.dhaT2 | Cb | ColE1 | double $P_{Tac}$ , $P_{Trc}$ | Codon-optimized Ter from <i>Treponema denticola</i> under double tac promoter, codon-optimized ALDH from <i>Clostridium beijerinckii</i> NCIMB 8052 in operon with codon-optimized dhaT from <i>Halanaerobium hydrogeniformans</i> ( <i>Halanaerobium</i> sp. (strain <i>sapolanicus</i> )) under Trc promoter | 1907 |
| pCWori.trc-ter-aldh46.dhaT3 | Cb | ColE1 | double $P_{Tac}$ , $P_{Trc}$ | Codon-optimized Ter from <i>Treponema denticola</i> under double tac promoter, codon-optimized ALDH from <i>Clostridium beijerinckii</i> NCIMB 8052 in operon with codon-optimized dhaT from <i>Citrobacter freundii</i> under Trc promoter                                                                    | 1908 |
| pCWori.trc-ter-aldh46.dhaT4 | Cb | ColE1 | double $P_{Tac}$ , $P_{Trc}$ | Codon-optimized Ter from <i>Treponema denticola</i> under double tac promoter, codon-optimized ALDH from <i>Clostridium beijerinckii</i> NCIMB 8052 in operon with codon-optimized dhaT from <i>Clostridium novyi</i> (strain NT)i under Trc promoter                                                          | 1909 |
| pCWori.trc-ter-aldh46.dhaT5 | Cb | ColE1 | double $P_{Tac}$ , $P_{Trc}$ | Codon-optimized Ter from <i>Treponema denticola</i> under double tac promoter, codon-optimized ALDH from <i>Clostridium beijerinckii</i>                                                                                                                                                                       | 1910 |

|                             |    |       |                              |                                                                                                                                                                                                                                                                                            |      |
|-----------------------------|----|-------|------------------------------|--------------------------------------------------------------------------------------------------------------------------------------------------------------------------------------------------------------------------------------------------------------------------------------------|------|
|                             |    |       |                              | NCIMB 8052 in operon with codon-optimized dhaT from <i>Pelobacter carbinolicus</i> (strain DSM 2380 / Gra Bd 1) under Trc promoter                                                                                                                                                         |      |
| pCWori.trc-ter-aldh46.dhaT6 | Cb | ColE1 | double $P_{Tac}$ , $P_{Trc}$ | Codon-optimized Ter from <i>Treponema denticola</i> under double tac promoter, codon-optimized ALDH from <i>Clostridium beijerinckii</i> NCIMB 8052 in operon with codon-optimized dhaT from <i>Pelotomaculum thermopropionicum</i> (strain DSM 13744 / JCM 10971 / SI) under Trc promoter | 1922 |
| pCWori.trc-ter-aldh46.dhaT7 | Cb | ColE1 | double $P_{Tac}$ , $P_{Trc}$ | Codon-optimized Ter from <i>Treponema denticola</i> under double tac promoter, codon-optimized ALDH from <i>Clostridium beijerinckii</i> NCIMB 8052 in operon with codon-optimized dhaT from <i>Clostridium perfringens</i> D str. JGS1721 under Trc promoter                              | 1923 |
| pCWori.trc-ter-aldh46.dhaT8 | Cb | ColE1 | double $P_{Tac}$ , $P_{Trc}$ | Codon-optimized Ter from <i>Treponema denticola</i> under double tac promoter, codon-optimized ALDH from <i>Clostridium beijerinckii</i> NCIMB 8052 in operon with codon-optimized dhaT from <i>Ilyobacter polytropus</i> (strain DSM 2926 / CuHBu1) under Trc promoter                    | 1924 |

*B3. ALDH.ADH pairs.* The pCWori.trc-ter-aldhX.adhY series of plasmids was constructed using Gibson Assembly or Golden gate assembly. For constructs made by Gibson assembly, the pCWori.trc-ter-aldh46.adhY series of plasmids were used as the parent plasmids. The parent plasmid was digested with EcoRI and XbaI to remove *aldh46* to insert the corresponding *aldhX* gene. The *aldhX* gene was amplified with specific primers to generate appropriate overhang for the Gibson reaction. The pCDF3-aldh series of plasmid were used as PCR template for the ALDHs amplification. For constructs made by Golden Gate assembly, *aldhX* was amplified with the primers indicated in the primer table below using pCDF3-aldhX as a template. *adhY* was amplified with the primers indicated in the primer table below using pCWori.trc-ter-aldh46.adhY as a template for *adh2/8/12*. *adh15-22* were amplified using the gBlocks listed in *Table S1.E1* as

a template. The two PCR products were then inserted into the Golden Gate entry vector, pCWori.trc-ter-RFP, digested with BsaI.

*Primer Table S1.B3*

| <b>Combination</b> | <b><i>aldh</i> primers</b>                                         | <b><i>adh</i> primers</b>         | <b>Assembly Method</b> |
|--------------------|--------------------------------------------------------------------|-----------------------------------|------------------------|
| aldh3.adh2         | aldh3 GGF1<br>aldh3.(adh2) GGR1                                    | (aldh3).adh2 GGF1<br>adh2 GGR1    | Golden Gate            |
| aldh3.adh8         | aldh3 GGF1<br>aldh3.(adh8) GGR1                                    | (aldh3).adh8 GGF1<br>adh8 GGR1    | Golden Gate            |
| aldh3.adh12        | aldh3 GF1<br>aldh3.adh12 GR1                                       | from backbone                     | Gibson                 |
| aldh6.adh2         | aldh6 GGF1<br>aldh6.(adh2) GGR1                                    | (aldh6).adh2 GGF1<br>adh2 GGR1    | Golden Gate            |
| aldh6.adh8         | aldh6 GF1<br>aldh6.adh8 GR1                                        | from backbone                     | Gibson                 |
| aldh6.adh12        | aldh6 GGF1<br>aldh6.(adh12) GGR1                                   | (aldh14).adh12 GGF1<br>adh12 GGR1 | Golden Gate            |
| aldh7.adh2         | aldh7 GF1<br>aldh7.adh2 GR1<br>aldh7.adh2 GO1<br>aldh7.adh2 GO2    | from backbone                     | Gibson                 |
| aldh7.adh8         | aldh7 GF1<br>aldh7.adh8 GR1<br>aldh7.adh8 GO1<br>aldh7.adh8 GO2    | from backbone                     | Gibson                 |
| aldh7.adh12        | aldh7 GF1<br>aldh7.adh12 GR1<br>aldh7.adh12 GO1<br>aldh7.adh12 GO2 | from backbone                     | Gibson                 |
| aldh9.adh2         | aldh9 GGF1<br>aldh9.(adh2) GGR1                                    | (aldh9).adh2 GGF1<br>adh2 GGR1    | Golden Gate            |
| aldh9.adh8         | aldh9 GF1<br>aldh9.adh8 GR1                                        | from backbone                     | Gibson                 |
| aldh9.adh12        | aldh9 GF1<br>aldh9.adh12 GR1                                       | from backbone                     | Gibson                 |
| aldh14.adh2        | aldh14 GGF1<br>aldh14.(adh2) GGR1                                  | (aldh14).adh2 GGF1<br>adh2 GGR1   | Golden Gate            |
| aldh14.adh8        | aldh14 GGF1<br>aldh14.(adh8) GGR1                                  | (aldh14).adh8 GGF1<br>adh8 GGR1   | Golden Gate            |



|              |                                                |                                   |             |
|--------------|------------------------------------------------|-----------------------------------|-------------|
| aldh14.adh12 | aldh14 GGF1<br>aldh14.(adh12) GGR1             | (aldh14).adh12 GGF1<br>adh12 GGR1 | Golden Gate |
| aldh3.adh15  | aldh3 GGF1<br>aldh3.(adh) GGR1                 | adh15 GGF1<br>adh15 GGR1          | Golden Gate |
| aldh3.adh17  | aldh3 GGF1<br>aldh3.(adh) GGR1                 | adh17 GGF1<br>adh17 GGR1          | Golden Gate |
| aldh3.adh18  | aldh3 GGF1<br>aldh3.(adh) GGR1                 | adh18 GGF1<br>adh18 GGR1          | Golden Gate |
| aldh3.adh19  | aldh3 GGF1<br>aldh3.(adh) GGR1                 | adh19 GGF1<br>adh19 GGR1          | Golden Gate |
| aldh3.adh21  | aldh3 GGF1<br>aldh3.(adh) GGR1                 | adh21 GGF1<br>adh21 GGR1          | Golden Gate |
| aldh3.adh22  | aldh3 GGF1<br>aldh3.(adh) GGR1                 | adh22 GGF1<br>adh22 GGR1          | Golden Gate |
| aldh7.adh15  | aldh round 1 library GGF1<br>aldh7.(adh) GGR1  | adh15 GGF1<br>adh15 GGR1          | Golden Gate |
| aldh7.adh18  | aldh round 1 library GGF1<br>aldh7.(adh) GGR1  | adh18 GGF1<br>adh18 GGR1          | Golden Gate |
| aldh7.adh19  | aldh round 1 library GGF1<br>aldh7.(adh) GGR1  | adh19 GGF1<br>adh19 GGR1          | Golden Gate |
| aldh7.adh20  | aldh round 1 library GGF1<br>aldh7.(adh) GGR1  | adh20 GGF1<br>adh20 GGR1          | Golden Gate |
| aldh7.adh21  | aldh round 1 library GGF1<br>aldh7.(adh) GGR1  | adh21 GGF1<br>adh21 GGR1          | Golden Gate |
| aldh7.adh22  | aldh round 1 library GGF1<br>aldh7.(adh) GGR1  | adh22 GGF1<br>adh22 GGR1          | Golden Gate |
| aldh46.adh19 | aldh round 1 library GGF1<br>aldh46.(adh) GGR1 | adh19 GGF1<br>adh19 GGR1          | Golden Gate |
| aldh46.adh20 | aldh round 1 library GGF1<br>aldh46.(adh) GGR1 | adh20 GGF1<br>adh20 GGR1          | Golden Gate |
| aldh46.adh21 | aldh round 1 library GGF1<br>aldh46.(adh) GGR1 | adh21 GGF1<br>adh21 GGR1          | Golden Gate |

Plasmid Table S1.B3

| Name                       | Marker | Origin | Promoter        | Description                                                                                                                                                                                                                                                                                      | No.  |
|----------------------------|--------|--------|-----------------|--------------------------------------------------------------------------------------------------------------------------------------------------------------------------------------------------------------------------------------------------------------------------------------------------|------|
| pCWori.trc-ter-aldh3.adh2  | Cb     | ColE1  | double tac, trc | Codon-optimized Ter from <i>Treponema denticola</i> under double tac promoter, codon-optimized butyraldehyde dehydrogenase from <i>Clostridium saccharoperbutylacetonicum</i> N1-4(HMT) in operon with ADH from <i>Campylobacter fetus</i> subsp. fetus (strain 82-40) under Trc promoter        | 2096 |
| pCWori.trc-ter-aldh6.adh2  | Cb     | ColE1  | double tac, trc | Codon-optimized Ter from <i>Treponema denticola</i> under double tac promoter, codon-optimized hypothetical protein CLOBOL_07248 from <i>Clostridium bolteae</i> ATCC BAA-613 in operon with ADH from <i>Campylobacter fetus</i> subsp. fetus (strain 82-40) under Trc promoter                  | 2099 |
| pCWori.trc-ter-aldh7.adh2  | Cb     | ColE1  | double tac, trc | Codon-optimized Ter from <i>Treponema denticola</i> under double tac promoter, codon-optimized ethanolamine utilization protein EutE from <i>Clostridium botulinum</i> B str. Eklund 17B in operon with ADH from <i>Campylobacter fetus</i> subsp. fetus (strain 82-40) under Trc promoter       | 2076 |
| pCWori.trc-ter-aldh9.adh2  | Cb     | ColE1  | double tac, trc | Codon-optimized Ter from <i>Treponema denticola</i> under double tac promoter, codon-optimized ethanolamine utilization protein EutE from <i>Clostridium botulinum</i> E1 str. 'BoNT E Beluga' in operon with ADH from <i>Campylobacter fetus</i> subsp. fetus (strain 82-40) under Trc promoter | 2103 |
| pCWori.trc-ter-aldh14.adh2 | Cb     | ColE1  | double tac, trc | Codon-optimized Ter from <i>Treponema denticola</i> under double tac promoter, codon-optimized hypothetical protein HMPREF9942_01197 from <i>Fusobacterium nucleatum</i> subsp. animalis F0419 in operon with ADH from <i>Campylobacter fetus</i> subsp. fetus (strain 82-40) under Trc promoter | 2106 |
| pCWori.trc-ter-aldh3.adh8  | Cb     | ColE1  | double tac, trc | Codon-optimized Ter from <i>Treponema denticola</i> under double tac promoter, codon-optimized butyraldehyde dehydrogenase from <i>Clostridium saccharoperbutylacetonicum</i> N1-4(HMT) in operon with ADH from <i>Olsenella uli</i> (strain ATCC 49627) under Trc promoter                      | 2097 |

|                            |    |       |                    |                                                                                                                                                                                                                                                                                   |      |
|----------------------------|----|-------|--------------------|-----------------------------------------------------------------------------------------------------------------------------------------------------------------------------------------------------------------------------------------------------------------------------------|------|
| pCWori.trc-ter-aldh6.adh8  | Cb | ColE1 | double tac,<br>trc | Codon-optimized Ter from <i>Treponema denticola</i> under double tac promoter, codon-optimized hypothetical protein CLOBOL_07248 from <i>Clostridium botteae</i> ATCC BAA-613 in operon with ADH from <i>Olsenella uli</i> (strain ATCC 49627 under Trc promoter                  | 2100 |
| pCWori.trc-ter-aldh7.adh8  | Cb | ColE1 | double tac,<br>trc | Codon-optimized Ter from <i>Treponema denticola</i> under double tac promoter, codon-optimized ethanolamine utilization protein EutE from <i>Clostridium botulinum</i> B str. Eklund 17B in operon with ADH from <i>Olsenella uli</i> (strain ATCC 49627 under Trc promoter       | 2101 |
| pCWori.trc-ter-aldh9.adh8  | Cb | ColE1 | double tac,<br>trc | Codon-optimized Ter from <i>Treponema denticola</i> under double tac promoter, codon-optimized ethanolamine utilization protein EutE from <i>Clostridium botulinum</i> E1 str. 'BoNT E Beluga' in operon with ADH from <i>Olsenella uli</i> (strain ATCC 49627 under Trc promoter | 2104 |
| pCWori.trc-ter-aldh14.adh8 | Cb | ColE1 | double tac,<br>trc | Codon-optimized Ter from <i>Treponema denticola</i> under double tac promoter, codon-optimized hypothetical protein HMPREF9942_01197 from <i>Fusobacterium nucleatum</i> subsp. animalis F0419 in operon with ADH from <i>Olsenella uli</i> (strain ATCC 49627 under Trc promoter | 2107 |
| pCWori.trc-ter-aldh3.adh12 | Cb | ColE1 | double tac,<br>trc | Codon-optimized Ter from <i>Treponema denticola</i> under double tac promoter, codon-optimized butyraldehyde dehydrogenase from <i>Clostridium saccharoperbutylacetonicum</i> N1-4(HMT) in operon with ADH from <i>Clostridium spiroforme</i> DSM 1552 under Trc promoter         | 2098 |
| pCWori.trc-ter-aldh7.adh12 | Cb | ColE1 | double tac,<br>trc | Codon-optimized Ter from <i>Treponema denticola</i> under double tac promoter, codon-optimized ethanolamine utilization protein EutE from <i>Clostridium botulinum</i> B str. Eklund 17B in operon with ADH from <i>Clostridium spiroforme</i> DSM 1552 under Trc promoter        | 2102 |
| pCWori.trc-ter-aldh9.adh12 | Cb | ColE1 | double tac,<br>trc | Codon-optimized Ter from <i>Treponema denticola</i> under double tac promoter, codon-optimized ethanolamine utilization protein EutE from <i>Clostridium botulinum</i> E1 str. 'BoNT E Beluga' in operon with ADH from <i>Clostridium spiroforme</i> DSM 1552 under Trc promoter  | 2105 |

|                            |    |       |                 |                                                                                                                                                                                                                                                                                 |      |
|----------------------------|----|-------|-----------------|---------------------------------------------------------------------------------------------------------------------------------------------------------------------------------------------------------------------------------------------------------------------------------|------|
| pCWori.trc-ter-aldh3.adh15 | Cb | ColE1 | double tac, trc | Codon-optimized Ter from <i>Treponema denticola</i> under double tac promoter, codon-optimized butyraldehyde dehydrogenase from <i>Clostridium saccharoperbutylacetonicum</i> N1-4(HMT) in operon with ADH from <i>Desulfuromonas acetoxidans</i> DSM 684 under Trc promoter    | 2463 |
| pCWori.trc-ter-aldh3.adh17 | Cb | ColE1 | double tac, trc | Codon-optimized Ter from <i>Treponema denticola</i> under double tac promoter, codon-optimized butyraldehyde dehydrogenase from <i>Clostridium saccharoperbutylacetonicum</i> N1-4(HMT) in operon with ADH from <i>Dickeya dadantii</i> (strain Ech586) under Trc promoter      | 2464 |
| pCWori.trc-ter-aldh3.adh18 | Cb | ColE1 | double tac, trc | Codon-optimized Ter from <i>Treponema denticola</i> under double tac promoter, codon-optimized butyraldehyde dehydrogenase from <i>Clostridium saccharoperbutylacetonicum</i> N1-4(HMT) in operon with ADH from <i>Haemophilus parainfluenzae</i> ATCC 33392 under Trc promoter | 2465 |
| pCWori.trc-ter-aldh3.adh19 | Cb | ColE1 | double tac, trc | Codon-optimized Ter from <i>Treponema denticola</i> under double tac promoter, codon-optimized butyraldehyde dehydrogenase from <i>Clostridium saccharoperbutylacetonicum</i> N1-4(HMT) in operon with ADH from <i>Enterococcus saccharolyticus</i> 30_1 under Trc promoter     | 2466 |
| pCWori.trc-ter-aldh3.adh21 | Cb | ColE1 | double tac, trc | Codon-optimized Ter from <i>Treponema denticola</i> under double tac promoter, codon-optimized butyraldehyde dehydrogenase from <i>Clostridium saccharoperbutylacetonicum</i> N1-4(HMT) in operon with ADH from <i>Erysipelotrichaceae</i> bacterium 3_1_53 under Trc promoter  | 2467 |
| pCWori.trc-ter-aldh3.adh22 | Cb | ColE1 | double tac, trc | Codon-optimized Ter from <i>Treponema denticola</i> under double tac promoter, codon-optimized butyraldehyde dehydrogenase from <i>Clostridium saccharoperbutylacetonicum</i> N1-4(HMT) in operon with ADH from <i>Clostridium</i> sp. SS2/1 under Trc promoter                 |      |
| pCWori.trc-ter-aldh7.adh15 | Cb | ColE1 | double tac, trc | Codon-optimized Ter from <i>Treponema denticola</i> under double tac promoter, codon-optimized ethanolamine utilization protein EutE from <i>Clostridium botulinum</i> B str. Eklund 17B in operon with ADH from <i>Desulfuromonas acetoxidans</i> DSM 684 under Trc promoter   | 2479 |

|                             |    |       |                    |                                                                                                                                                                                                                                                                                                |      |
|-----------------------------|----|-------|--------------------|------------------------------------------------------------------------------------------------------------------------------------------------------------------------------------------------------------------------------------------------------------------------------------------------|------|
| pCWori.trc-ter-aldh7.adh18  | Cb | ColE1 | double tac,<br>trc | Codon-optimized Ter from <i>Treponema denticola</i> under double tac promoter, codon-optimized ethanolamine utilization protein EutE from <i>Clostridium botulinum</i> B str. Eklund 17B in operon with ADH from <i>Haemophilus parainfluenzae</i> ATCC 33392 under Trc promoter               | 2482 |
| pCWori.trc-ter-aldh7.adh19  | Cb | ColE1 | double tac,<br>trc | Codon-optimized Ter from <i>Treponema denticola</i> under double tac promoter, codon-optimized ethanolamine utilization protein EutE from <i>Clostridium botulinum</i> B str. Eklund 17B in operon with ADH from <i>Enterococcus saccharolyticus</i> 30_1 under Trc promoter                   | 2483 |
| pCWori.trc-ter-aldh7.adh20  | Cb | ColE1 | double tac,<br>trc | Codon-optimized Ter from <i>Treponema denticola</i> under double tac promoter, codon-optimized ethanolamine utilization protein EutE from <i>Clostridium botulinum</i> B str. Eklund 17B in operon with ADH from <i>Clostridium botulinum</i> (strain Alaska E43 / Type E3) under Trc promoter | 2484 |
| pCWori.trc-ter-aldh7.adh21  | Cb | ColE1 | double tac,<br>trc | Codon-optimized Ter from <i>Treponema denticola</i> under double tac promoter, codon-optimized ethanolamine utilization protein EutE from <i>Clostridium botulinum</i> B str. Eklund 17B in operon with ADH from <i>Erysipelotrichaceae</i> bacterium 3_1_53 under Trc promoter                | 2485 |
| pCWori.trc-ter-aldh7.adh22  | Cb | ColE1 | double tac,<br>trc | Codon-optimized Ter from <i>Treponema denticola</i> under double tac promoter, codon-optimized ethanolamine utilization protein EutE from <i>Clostridium botulinum</i> B str. Eklund 17B in operon with ADH from ADH from <i>Clostridium</i> sp. SS2/1 under Trc promoter                      | 2486 |
| pCWori.trc-ter-aldh46.adh19 | Cb | ColE1 | double tac,<br>trc | Codon-optimized Ter from <i>Treponema denticola</i> under double tac promoter, codon-optimized codon-optimized ALDH from <i>Clostridium beijerinckii</i> NCIMB 8052 in operon with ADH from <i>Enterococcus saccharolyticus</i> 30_1 under Trc promoter                                        | 2491 |
| pCWori.trc-ter-aldh46.adh20 | Cb | ColE1 | double tac,<br>trc | Codon-optimized Ter from <i>Treponema denticola</i> under double tac promoter, codon-optimized codon-optimized ALDH from <i>Clostridium beijerinckii</i> NCIMB 8052 in operon with ADH from <i>Clostridium botulinum</i> (strain Alaska E43 / Type E3) under Trc promoter                      | 2492 |

|                             |    |       |                 |                                                                                                                                                                                                                                                            |      |
|-----------------------------|----|-------|-----------------|------------------------------------------------------------------------------------------------------------------------------------------------------------------------------------------------------------------------------------------------------------|------|
| pCWori.trc-ter-aldh46.adh21 | Cb | ColE1 | double tac, trc | Codon-optimized Ter from <i>Treponema denticola</i> under double tac promoter, codon-optimized codon-optimized ALDH from <i>Clostridium beijerinckii</i> NCIMB 8052 in operon with ADH from <i>Erysipelotrichaceae</i> bacterium 3_1_53 under Trc promoter | 2493 |
|-----------------------------|----|-------|-----------------|------------------------------------------------------------------------------------------------------------------------------------------------------------------------------------------------------------------------------------------------------------|------|

*B4. Secondary ADHs (BDO).* The pCWori.trc-sADH-aldh7.adh2 series of plasmids (SADH1-16) were constructed by replacing the *ter* gene in the NdeI and XhoI site of the pCWori.trc-ter-aldh7.adh2 parent plasmid with the corresponding gBlock sequences (*Table S1.E2*).

| Name                        | Marker | Origin | Promoter                     | Description                                                                    | No.  |
|-----------------------------|--------|--------|------------------------------|--------------------------------------------------------------------------------|------|
| pCWori.trc-sadh1-aldh7.adh2 | Cb     | ColE1  | $P_{Trc}$ , double $P_{Tac}$ | SADH1 is from <i>Pichia kudriavzevii</i> . Accession # KGK36767.1              | 2430 |
| pCWori.trc-sadh2-aldh7.adh2 | Cb     | ColE1  | $P_{Trc}$ , double $P_{Tac}$ | SADH2 is from <i>Pyrococcus furiosus</i> DSM 3638. Accession # WP_011011186.1  | 2431 |
| pCWori.trc-sadh3-aldh7.adh2 | Cb     | ColE1  | $P_{Trc}$ , double $P_{Tac}$ | SADH3 is from <i>Cupriavidus necator</i> . Accession # WP_011614641.1          | 2432 |
| pCWori.trc-sadh4-aldh7.adh2 | Cb     | ColE1  | $P_{Trc}$ , double $P_{Tac}$ | SADH4 is from <i>Thermoanaerobacter brockii</i> . Accession # P14941.1         | 2433 |
| pCWori.trc-sadh5-aldh7.adh2 | Cb     | ColE1  | $P_{Trc}$ , double $P_{Tac}$ | SADH5 is from <i>Clostridium beijerinckii</i> . Accession # AAA23199.2         | 2434 |
| pCWori.trc-sadh6-aldh7.adh2 | Cb     | ColE1  | $P_{Trc}$ , double $P_{Tac}$ | SADH6 is from <i>Kluyveromyces lactis</i> NRRL Y-1140. Accession # XP_455102.1 | 2435 |
| pCWori.trc-sadh7-aldh7.adh2 | Cb     | ColE1  | $P_{Trc}$ , double $P_{Tac}$ | SADH7 is from <i>Phytomonas</i> sp. ADU-2003 . Accession # AAP39869.1          | 2436 |
| pCWori.trc-sadh8-aldh7.adh2 | Cb     | ColE1  | $P_{Trc}$ , double $P_{Tac}$ | SADH8 is from <i>Ralstonia eutropha</i> H16 . Accession # Q0KDL6.1             | 2437 |
| pCWori.trc-sadh9-aldh7.adh2 | Cb     | ColE1  | $P_{Trc}$ , double $P_{Tac}$ | SADH9 is from <i>Trichomonas vaginalis</i> G3. Accession # XP_001580601.1      | 2438 |

|                                |    |       |                                 |                                                                         |      |
|--------------------------------|----|-------|---------------------------------|-------------------------------------------------------------------------|------|
| pCWori.trc-sadh10-aldh7.adh2   | Cb | ColE1 | $P_{Trc}$ ,<br>double $P_{Tac}$ | SADH10 is from <i>Pseudomonas fluorescens</i> . Accession # AJP52792.1  | 2439 |
| pCWori.trc-sadh11-aldh7.adh2   | Cb | ColE1 | $P_{Trc}$ ,<br>double $P_{Tac}$ | SADH11 is from <i>Lactococcus lactis</i> . Accession # WP_011835462.1   | 2440 |
| pCWori.trc-sadh12-aldh7.adh2   | Cb | ColE1 | $P_{Trc}$ ,<br>double $P_{Tac}$ | SADH12 is from <i>Saccharomyces cerevisiae</i> . Accession # AAC04974.1 | 2441 |
| pCWori.trc-sadh13-aldh7.adh2   | Cb | ColE1 | $P_{Trc}$ ,<br>double $P_{Tac}$ | SADH13 is from <i>Escherichia coli</i> . Accession # WP_000374004.1     | 2442 |
| pCWori.trc-sadh14-aldh7.adh2   | Cb | ColE1 | $P_{Trc}$ ,<br>double $P_{Tac}$ | SADH14 is from <i>Zygoascus ofunaensis</i> . Accession # BAD32689.1     | 2443 |
| pCWori.trc-sadh15-2-aldh7.adh2 | Cb | ColE1 | $P_{Trc}$ ,<br>double $P_{Tac}$ | SADH15 is from <i>Candida parapsilosis</i> . Accession # BAA24528.1     | 2444 |
| pCWori.trc-sadh16-aldh7.adh2   | Cb | ColE1 | $P_{Trc}$ ,<br>double $P_{Tac}$ | SADH16 is from <i>Cyberlindnera jadinii</i> . Accession # BAN45671.1    | 2445 |

**C. Oligonucleotide sequences.** For primers used to introduce guide sequences for genome mutation, the guide sequence is in red.

| Name               | Sequence                                                                                                   |
|--------------------|------------------------------------------------------------------------------------------------------------|
| adhE2 F6           | gatatacatatggcaagctggagccacccgcagttcgaaaaggggtgcaggtatgaaagtcacgaacca<br>gaaggaactgaagcagaaaactgaacgaactgc |
| adhE2 R1           | atcaagcttggtaccttaaaaagatttgatataaatgtcttcagctcagagatcagcgggtaacgcggg                                      |
| adhE2 R9           | cgcgatacccgcggcagctggtgcatagcaccag                                                                         |
| adhE2 F9           | cacgtgccggcgggtatcgcgtgtgctgctgatcgaagaagtaattaagtacaacgc                                                  |
| adhE2 R11          | gtgagccatagacgcgcacacgcccaggaacgcggtgg                                                                     |
| adhE2 F11          | cctgggcgtgtgcgctctatggctcaciaactgggtgctatgcaccacgtgcc                                                      |
| adhE2 AADH R1      | atcaagcttggtaccttagtttcacggcgttctgcaacagatttgatgttcagcagatgc                                               |
| trc.crt delete GO1 | caagcttgcattgcctgcaggctgactctagattagccatgtgcaggccaccgttcaggg                                               |
| trc.crt delete GO2 | gaacggtggcctgcacatgggctaacttagagtcgacctgcaggcatgcaagcttggctg                                               |
| phaA GF1           | taacaattcacacagagctcaaggagatatacatatgactgatgtgtgattgtaagcg                                                 |
| phaA GR1           | aaaacagccaagcttgcattgcctgcaggctgactctagattattgcttgcagacagccag                                              |
| Clo DF13-cop3 QCF1 | gatttgggtgctgtgctctgcgaaaaccagttaccacggtaagcagttcc                                                         |
| Clo DF13-cop3 QCR1 | ggaactgcttaaccgtgtaactggttttcgcagagcacagcaaccaaact                                                         |
| aadA CloDF F1      | gatacaaagctttattgcccactaccttggatctcg                                                                       |
| aadA CloDF R1      | gatacacctgagggatcaaaggatcttcttgagatcctttttctg                                                              |
| ter delete GO5     | agcggataacaattcacacaggaaacaggatccgaattcaaaaaaggaggtaaaaaatg                                                |
| ter delete GO6     | catttttacctcctttttgaattcggatcctgttctgtgtaaattgtatccgct                                                     |
| aldh46 GF3         | tgagggtattaactacgagc                                                                                       |
| aldh46.ADH GR1     | acttgaaccacagcattaggacctcctctggaagctctagattagccggccagaacac                                                 |
| aldh46.ADH GF1     | gttctggccggctaactagagcttaccagaggaggtcctaattgctggttcaaaagtc                                                 |
| ADH GR1            | catgttgacagcttatcatcgataagcttttaaaaagatttgatataaatgtcttcag                                                 |
| aldh GF1           | ttgtgagcggataacaattcacacaggaaacaggaattcaaaaaaggaggtaaaaaatg                                                |
| aldh3 GF2          | cggataacaattcacacaggaaacaggaattcaaaaaaggaggtaaaaaatgattaagg                                                |
| aldh3.adh12 GR1    | cggttggagtaggtaaaagtcgcccagcatttcttcccccttaggaactagggttctagattaaccgccca<br>gaacacaac                       |
| aldh6 GF2          | gcgataacaattcacacaggaaacaggaattcaaaaaaggaggtaaaaaatgaaagag                                                 |
| aldh6.adh8 GR1     | ggtcggtagctggaacatgaagtcgtacatttggctccccttgcgctaggattcttagattaacgaatgcta<br>aaggcgtcc                      |
| aldh7 GF2          | gagcggataacaattcacacaggaaacaggaattcaaaaaaggaggtaaaaaatggaac                                                |
| aldh7.adh2 GR1     | ttcgatacgggtggattgtagtaggaaaagtgaccatcttatacctcttgtgtgaaagctctagattaac<br>cgccagaacgcaac                   |



|                           |                                                                                             |
|---------------------------|---------------------------------------------------------------------------------------------|
| aldh7.adh2 GO1            | tttctactgcaatccaaccggtatcgaattcggcaaaggtaaagaaaactccatcgg                                   |
| aldh7.adh2 GO2            | accgatggagttttcttaccttgccgaattcgatacgggttgattgcagtaggaaaa                                   |
| aldh7.adh8 GR1            | ggtcggtagctggaacatgaagtcgtacattaaaagtcctccccctgtgggtttctagattaaccggccag<br>aacgcaac         |
| aldh7.adh12 GR1           | cgggttgagtaggtaaagtcgcccagcataagtatatctccttaagttccttggtctagattaaccggccag<br>aacgcaac        |
| aldh9 GF2                 | gcgataacaattcacacaggaacaggaattcaaaaaaggaggtaaaaaatgaatgac                                   |
| aldh9.adh8 GR1            | tcggtacgtggaacatgaagtcgtacatttagtcccccttaagattagcgtctagattacttaatagaaa<br>agttgtcaaccataacg |
| aldh9.adh12 GR1           | ggttgagtaggtaaagtcgcccagcatagtttagtacctccttggttaggtatctagattacttaatagaaa<br>gtgtcaaccataacg |
| aldh round 1 library GGF1 | gctcagcggctcgaattcaaaaaaggaggtaaaaaatg                                                      |
| aldh3 GGF1                | gatacaggctcgtattcaaaaaaggaggtaaaaaatgattaaggac                                              |
| aldh6 GGF1                | gatacaggctctattcaaaaaaggaggtaaaaaatgaaagg                                                   |
| aldh9 GGF1                | gatacaggctcaattcaaaaaaggaggtaaaaaatgaatgactttaac                                            |
| aldh14 GGF1               | gatacaggctccattcaaaaaaggaggtaaaaaatggaattg                                                  |
| adh2 GGR1                 | gatacaggctccactagtttagtaagccagggtcagaattcttc                                                |
| adh8 GGR1                 | gatacaggctcaactagttacagagcagcacggtagattc                                                    |
| adh12 GGR1                | gatacaggctcgactagttattcatggattgttcaggatg                                                    |
| (aldh14).adh12 GGF1       | gatacaggctcaagacaccaggaggcaagcatgctggcgactttacct                                            |
| aldh14.(adh12) GGR1       | gatacaggctccgcttagatctagattatattaatgctaaaaccgcca                                            |
| (aldh14).adh8 GGF1        | gatacaggctcacgagaaggaggataatcctatgtacgacttcatgttccacg                                       |
| aldh14.(adh8) GGR1        | gatacaggctctctcgcgctagcttagattatattaatgctaaaaccgcca                                         |
| (aldh14).adh2 GGF1        | gatacaggctcaccgaatctaggaggaatcacatggtcaacttttctactgcaa                                      |
| aldh14.(adh2) GGR1        | gatacaggctcctcgggttcttagattatattaatgctaaaaccgcca                                            |
| (aldh9).adh2 GGF1         | gatacaggctccaagggaggctccgccaatggtcaacttttctactgcaa                                          |
| aldh9.(adh2) GGR1         | gatacaggctcacctttgtatgatctagattacttaatagaaaagttgtcaaccataacg                                |
| (aldh6).adh12 GGF1        | gatacaggctctaaggaggacacgacacccatgctggcgactttacct                                            |
| aldh6.(adh12) GGR1        | gatacaggctcccccttatgtcggcttagattaacgaatgctaaaggcgctcc                                       |
| (aldh6).adh2 GGF1         | gatacaggctcaaaaggggtaaccaatggtcaacttttctactgcaa                                             |
| aldh6.(adh2) GGR1         | gatacaggctctcttagattagatctagattaacgaatgctaaaggcgctcc                                        |
| (aldh3).adh8 GGF1         | gatacaggctcacacaagggggcaataaatgtacgacttcatgttccacg                                          |
| aldh3.(adh8) GGR1         | gatacaggctcagtgctatgagtctagattaaccgcccagaacacaa                                             |
| (aldh3).adh2 GGF1         | gatacaggctcctccagaggaggaacagatggtcaacttttctactgcaa                                          |
| aldh3.(adh2) GGR1         | gatacaggctcgtggattgtttgtctagattaaccgcccagaacacaa                                            |
| adh15 GGF1                | gatacaggctcgtctagaagagatc                                                                   |
| adh15 GGR1                | tgatcggctctactagtttagctacg                                                                  |
| adh16 GGF1                | gatacaggctcgtctagaagagtaataag                                                               |
| adh16 GGR1                | tgatcggctctactagtttaacgttag                                                                 |
| adh17 GGF1                | gatacaggctcgtctagatagccag                                                                   |
| adh17 GGR1                | tgatcggctctactagtttacagtgc                                                                  |
| adh18 GGF1                | gatacaggctcgtctagacacgac                                                                    |
| adh18 GGR1                | tgatcggctctactagtttatttgc                                                                   |

|                   |                                                                 |
|-------------------|-----------------------------------------------------------------|
| adh20 GGF1        | gatacagggtctcgcttagacataaagc                                    |
| adh20 GGR1        | tgtatcgggtctctactagtttacagagc                                   |
| adh22 GGF1        | gatacagggtctcgcttagataaaatcc                                    |
| adh22 GGR1        | tgtatcgggtctctactagtttacaggg                                    |
| aldh3.(adh) GGR1  | gatacagggtctcttagattaacccgccagaacacaa                           |
| aldh6.(adh) GGR1  | gatacagggtctcttagattaacgaatgctaaaggcgctcc                       |
| aldh7.(adh) GGR1  | gatacagggtctcttagattaacccgccagaacgc                             |
| aldh46.(adh) GGR1 | gatacagggtctcttagattagccggccagaacacaa                           |
| rrnB-1 GF1        | ggtattaactacgaggcagaagtg                                        |
| rrnB-1 GR1        | gttcctactctcgcatgggctgacccccactaccatcg                          |
| rrnB-2 GF1        | cgatggtagtggtgggctagcccatgagagtagggaac                          |
| rrnB-2 GR1        | cagctccgatggctgcc                                               |
| Bsal delete GO1   | gctgataaatctggagccggtgagcgtggctcccgggtatcattgcagcactggggcca     |
| Bsal delte GO2    | tggcccagtgctgcaatgataccgaggccacgctcaccggctccagatttatcagc        |
| RFP Bsal GR2      | gatctgctcatgtttgacagcttatcatcgatactaggagacctataaacgcagaaaggc    |
| RFP Bsal GF2      | gataacaatttcacacaggaaacaggaattcagagacctccctatcagtgatagagattg    |
| sadh1 GF1         | caggaaacaggatccatcgatgcttaggaggtcatatgttcatgaaaggctgacgtatc     |
| sadh1 GR1         | aaaatcttctctcatccgcaaaaacagccctcgagttacggcgctcagaataatttcatc    |
| sadh2 GF1         | ggaaacaggatccatcgatgcttaggaggtcatatgtctaagaactacaaaaagcaccag    |
| sadh2 GR1         | atcttctctcatccgcaaaaacagccctcgagttagtagtattccggtttctggtaaatagag |
| sadh3 GF1         | cacaggaaacaggatccatcgatgcttaggaggtcatatgaaaatctctctgacttccgc    |
| sadh3 GR1         | gctgaaaatcttctctcatccgcaaaaacagccctcgagttaagcggctcgactgcgac     |
| sadh4 GF1         | cacacaggaaacaggatccatcgatgcttaggaggtcatatgaaagggttcgctatgctg    |
| sadh4 GR1         | gctgaaaatcttctctcatccgcaaaaacagccctcgagttacgcccaggatgactaccgg   |
| sadh5 GF1         | cacacaggaaacaggatccatcgatgcttaggaggtcatatgaaagggttcgctatgctg    |
| sadh5 GR1         | cttctctcatccgcaaaaacagccctcgagttacagaattacaacagctttgatcagatc    |
| sadh6 GF1         | acaatttcacacaggaaacaggatccatcgatgcttaggaggtcatatgacgagcactggc   |
| sadh6 GR1         | gctgaaaatcttctctcatccgcaaaaacagccctcgagttagttggtcgcgctccagttc   |
| sadh7 GF1         | acacaggaaacaggatccatcgatgcttaggaggtcatatgaaagcagccggttcaaag     |
| sadh7 GR1         | gaaaatcttctctcatccgcaaaaacagccctcgagttacggcttgatggctactttcag    |
| sadh8 GF1         | ttcacacaggaaacaggatccatcgatgcttaggaggtcatatgaccgcatgatgaagg     |
| sadh8 GR1         | aggctgaaaatcttctctcatccgcaaaaacagccctcgagttagtgcggttgatggcg     |
| sadh9 GF1         | ttcacacaggaaacaggatccatcgatgcttaggaggtcatatgacctcgaactgccg      |
| sadh9 GR1         | aatcttctctcatccgcaaaaacagccctcgagttacagtttgcggttgatcaatcag      |
| sadh10 GF1        | ttcacacaggaaacaggatccatcgatgcttaggaggtcatatgatggcgaccatgaaag    |
| sadh10 GR1        | ctgaaaatcttctctcatccgcaaaaacagccctcgagttacggggtgattgcaactttc    |
| sadh11 GF1        | ttcacacaggaaacaggatccatcgatgcttaggaggtcatatgtctaaagtggtgccc     |
| sadh11 GR1        | gctgaaaatcttctctcatccgcaaaaacagccctcgagttaatgaaattgatgccacc     |
| sadh12 GF1        | cacacaggaaacaggatccatcgatgcttaggaggtcatatgctgctgctggcctatttc    |
| sadh12 GR1        | ctgaaaatcttctctcatccgcaaaaacagccctcgagttatttcattccaccgtggtg     |
| sadh13 GF1        | ttcacacaggaaacaggatccatcgatgcttaggaggtcatatggaccgcatcatccag     |
| sadh13 GR1        | aggctgaaaatcttctctcatccgcaaaaacagccctcgagttattccattctcgcagg     |

|               |                                                              |
|---------------|--------------------------------------------------------------|
| sadh14 GF1    | acacaggaaacaggatccatcgatgcttaggaggtcatatgatgaaagcgctgtgttacc |
| sadh14 GR1    | ctgaaaatcttctcatccgcaaaacagccctcgagtattcgtcacaggtgatcacc     |
| sadh15 GF1    | ttcacacaggaaacaggatccatcgatgcttaggaggtcatatgagcattccgtccagc  |
| sadh15 GR1    | tctctcatccgcaaaacagccctcgagttacgggttaaagacaacacgaccctcatacg  |
| sadh16 GF1    | ttcacacaggaaacaggatccatcgatgcttaggaggtcatatgctgcgactaatctgc  |
| sadh16 GR1    | aatcttctcatccgcaaaacagccctcgagtatttgtagtatccacgacgtaacg      |
| <hr/>         |                                                              |
| .03 HBD QF1   | cgactacgggtaattcggaac                                        |
| .03 HBD QR1-1 | atcaacaaattcatcctaatgtcg                                     |
| .03 HBD QR1-2 | gtttttgtaatagaagtcaggc                                       |
| .03 HBD QR1   | cgactgctgtccgaattacc                                         |
| .03 HBD QF1-1 | ggttgccgatcctggtgacg                                         |
| .03 HBD QF1-2 | gccaccaatcggtgcttctg                                         |
| pTT QF1       | aatgagctgttgacaattaatcatc                                    |
| pTT QR1       | ccaccgaactaccaacagc                                          |
| pTT QF2       | cgtataatgtgtggaattgtgagc                                     |
| pTT QR2       | actactgcccagttccgg                                           |
| pTT QF3       | agctggcacgacaggtttcc                                         |
| pTT QR3       | cacagctccgatggctgcc                                          |
| .3 crt QF1    | ggctgcacacaagacagacc                                         |
| .3 crt QR1-1  | gatttcgccaataacgtagtcc                                       |
| .3 crt QR1-2  | gcacttcgctgtctgtctcg                                         |
| .3 crt QR1    | gtcttgtgtgcagcctctcg                                         |
| .3 crt QF1-1  | tcgctcaaggcgcactcccg                                         |
| .3 crt QF1-2  | gtaaatacactgcataattcgtgtcg                                   |
| CmR QF1       | ggggcgaagaagttgtcc                                           |
| CmR QR1       | atattcgcaagatgtggcg                                          |
| CmR QF2       | ttgccatacgaattccg                                            |
| CmR QR2       | gaggcatttcagtcagttgc                                         |

## D. Gene sequences of dehydrogenases

### D1. *AdhE2* variants in the *pCDF3-TdTer.AdhE2.1-96* plasmids

#### AdhE2.1 (76930)

```

1  ATGAAAGTGA CGAACCAAAA AGAACTGAAA CAAAAACTGA ATGAACTGCG TGAGGCCCCAG
61  AAAAAGTTTCG CTACGTATAC CCAGGAGCAA GTTGACAAGA TCTTCAAACA GTGTGCCATT
121 GCGGCTGCCA AAGAGCGTAT TAACTTGGCC AACTGGCGG TGGAAGAAAC CGGCATCGGT
181 CTGGTCGAGG ACAAGATTAT CAAGAATCAC TTTGCCGCGG AGTATATCTA CAACAAATAC
241 AAAAACGAAA AGACTTGCGG CATCATTGAT CATGATGACA GCTTGGGTAT CACGAAAGTC
301 GCAGAACCAA TCGGTATTGT CGGGCAATT GTCCCGACCA CTAATCCGAC CAGCACCGCG
361 ATCTTCAAGA GCTTGATCAG CCTGAAAACC CGCAACGCGA TTTTCTTCAG CCCGCACCCG
421 CGTGCGAAGA AGAGCACCAT CGCAGCGGCG AAGCTGATTT TGGATGCCGC GGTTAAGGCC
481 GGTGCACCGA AAAACATTAT TGGCTGGATT GACGAGCCGA GCATTGAGCT GTCTCAGGAC

```

541 CTGATGAGCG AAGCGGACAT TATTCTGGCC ACCGGTGGTC CGTCTATGGT TAAGGCAGCG  
601 TACTCCAGCG GTAAGCCTGC TATCGGCGTT GGTGCGGGCA ATACGCCGGC TATCATCGAT  
661 GAAAGCGCGG ATATTGATAT GGCAGTTAGC TCCATCATTC TGTCCAAAAC CTACGACAAT  
721 GGTGTTATCT GTGCAAGCGA GCAAAGCATC CTGGTGATGA ATAGCATTTA CGAGAAGGTC  
781 AAAGAAGAGT TTGTTAAGCG TGGTTCCTAT ATTCTGAACC AGAACGAGAT TGCAAAAATC  
841 AAAGAAACGA TGTTAAGAA TGCGCGGATT AATGCAGATA TTGTTGGTAA GTCCGCATAC  
901 ATTATCGCGA AGATGGCGGG TATCGAAGTG CCGCAAACCA CCAAATCTTT GATCGGCGAA  
961 GTGCAGAGCG TGGAGAAGAG CGAACTGTTT AGCCATGAGA AACTGAGCCC GGTTCCTGGCT  
1021 ATGTACAAAG TGAAGGACTT TGACGAAGCC CTGAAGAAAG CTCAGCGTCT GATTGAGCTG  
1081 GGCGGCAGCG GTCACACGAG CAGCCTGTAT ATCGATAGCC AAAACAATAA GGACAAGGTG  
1141 AAAGAGTTTC GTCTGGCGAT GAAAACCTCT CGCACGTTTA TCAACATGCC GAGCAGCCAA  
1201 GGTGCGAGCG GCGATCTGTA TAACTTCGCA ATCGCGCCTT CTTTTACGCT GGGTTGCGGT  
1261 ACCTGGGGCG GTAATTCGGT GAGCCAGAAT GTCGAGCCGA AGCACCTGCT GAACATCAAA  
1321 TCGGTGCGCG AGCGCCGTGA GAAGAGACCG TGTTCAAAG TCCCACAGAA AATTTACTTC  
1381 AAATACGGCT GCCTGCGTTT CGCGCTGAAA GAACTGAAAG ACATGAACAA AAAGCGTGCG  
1441 TTCATTGTTA CCGACAAAGA CCTGTTCAAA CTGGGTTACG TGAACAAAAT CACCAAAGTT  
1501 CTGGATGAAA TTGACATCAA GTACTCCATC TTCACTGATA TCAAATCCGA CCCAACGATT  
1561 GATAGCGTGA AAAAGGCGC TAAAGAAATG CTGAACTTTG AACCGGACAC CATCATCAGC  
1621 ATCGGTGGTG GCTCTCCTAT GGATGCTGCG AAGGTCATGC ACCTGCTGTA CGAATACCCG  
1681 GAAGCGGAAA TCGAAAACCT GGCTATCAAC TTCATGGACA TCCGAAAACG TATCTGCAAC  
1741 TTCCCGAAGC TGGGCACTAA AGCTATTTCC GTTGCCATCC CGACTACCGC GGGCACTGGT  
1801 TCCGAAGCCA CGCCGTTCGC CGTGATCACC AACGATGAAA CCGGTATGAA ATACCCGCTG  
1861 ACCTCTTACG AACTGACCCC GAACATGGCA ATTATCGACA CCGAGCTGAT GCTGAACATG  
1921 CCGCGCAAGC TGACCGCTGC TACCGGCATC GACGCTCTGG TACATGCTAT TGAGGCGTAC  
1981 GTTTCCGTGA TGGCTACCGA TTACACCGAC GAACTGGCCC TCGGTGCGAT CAAAATGATT  
2041 TTCAAGTACC TGCTCGCGC TTACAAAAAC GGCACGAATG ACATCGAGGC GCGTGAGAAA  
2101 ATGGCCCATG CAAGCAACAT CGCGGGCATG GCCTTCGCCA ACGCGTTTCT GGGCGTGTGC  
2161 CACTCTATGG CTCACAAACT GGGTGCTATG CACCACGTGC CGCACGGTAT CGCGTGTGCT  
2221 GTCCTGATCG AAGAAGTAAT TAAGTACAAC GCTACTGATT GCCCGACTAA ACAGACCGCC  
2281 TTCCACAGT ACAAACTCTC TAACGTAAA CGTAAGTACG CTGAGATCGC CGAATCTCTG  
2341 AACCTGAAGG GTACGAGCGA CACTGAGAAA GTTACTGCGC TGATCGAAGC TATCTCTAAA  
2401 CTGAAAATTG ACCGTCCCAT CCCGCAGAAC ATCAGCGCCG CAGGCATCAA CAAAAAGGAC  
2461 TTTTACAACA CGCTGGACAA AATGAGCGAA CTGGCTTTTG ACGACCAGTG CACCACTGCA  
2521 AACCCGCGTT ACCCGCTGAT CTCTGAGCTG AAAGACATTT ATATCAAATC TTTTAA

**AdhE2.2 (76931)**

1 ATGAAAGTGA CGAACCAAAA AGAACTGAAA CAAAAAGACA ATGAACTGCG TGAGGCCAG  
61 AAAAAGTTCG CTAGCTATAC CCAGGAGCAA GTTGACAAGA TCTTCAAACA GTGTGCCATT  
121 CCGGTGCGCA AAGAGCGTAT TAACTTGCCG AACTGCGCGG TGAAGAAAAC CGGCATCGGT  
181 CTGGTTCGAG ACAAGATTAT CAAGAATCAC TTTGCCGCGG AGTATATCTA CAACAAATAC  
241 AAAACCGGTA AGACTTGCGG CATCATTTGAT CATGATGACA GCTTGGGTAT CACGAAAGTC  
301 GCAGAACCAA TCGGTATTGT CGCGGCAATT GTCCCGACCA CTAATCCGAC CAGCACCAGC  
361 ATCTTCAAGA GCTTGATCAG CCTGAAAACC CGCAACGCGA TTTTCTTCAG CCCGCACCCG  
421 CGTGCGAAGA AGAGCACCAT CGCAGCGGCG AAGCTGATTT TGGATGCCGC GGTAAAGGCC  
481 GGTGCACCGA AAAACATTAT TGGCTGGATT GACGAGCCGA GCATTGAGCT GTCTCAGGAC  
541 CTGATGAGCG AAGCGGACAT TATTCTGGCC ACCGGTGGTC CGTCTATGGT TAAGGCAGCG  
601 TACTCCAGCG GTAAGCCTGC TATCGGCGTT GGTGCGGGCA ATACGCCGGC TATCATCGAT  
661 GAAAGCGCGG ATATTGATAT GGCAGTTAGC TCCATCATTC TGTCCAAAAC CTACGACAAT  
721 GGTGTTATCT GTGCAAGCGA GCAAAGCATC CTGGTGATGA ATAGCATTTA CGAGAAGGTC  
781 AAAGAAGAGT TTGTTAAGCG TGGTTCCTAT ATTCTGAACC AGAACGAGAT TGCAAAAATC  
841 AAAGAAACGA TGTTAAGAA TGCGCGGATT AATGCAGATA TTGTTGGTAA GTCCGCATAC  
901 ATTATCGCGA AGATGGCGGG TATCGAAGTG CCGCAAACCA CCAAATCTTT GATCGGCGAA  
961 GTGCAGAGCG TGGAGAAGAG CGAACTGTTT AGCCATGAGA AACTGAGCCC GGTTCCTGGCT  
1021 ATGTACAAAG TGAAGGACTT TGACGAAGCC CTGAAGAAAG CTCAGCGTCT GATTGAGCTG  
1081 GGCGGCAGCG GTCACACGAG CAGCCTGTAT ATCGATAGCC AAAACAATAA GGACAAGGTG  
1141 AAAGAGTTTC GTCTGGCGAT GAAAACCTCT CGCACGTTTA TCAACATGCC GAGCAGCCAA  
1201 GGTGCGAGCG GCGATCTGTA TAACTTCGCA ATCGCGCCTT CTTTTACGCT GGGTTGCGGT  
1261 ACCTGGGGCG GTAATTCGGT GAGCCAGAAT GTCGAGCCGA AGCACCTGCT GAACATCAAA  
1321 TCGGTGCGCG AGCGCCGTGA GAAGAGACCG TGTTCAAAG TCCCACAGAA AATTTACTTC  
1381 AAATACGGCT GCCTGCGTTT CGCGCTGAAA GAACTGAAAG ACATGAACAA AAAGCGTGCG  
1441 TTCATTGTTA CCGACAAAGA CCTGTTCAAA CTGGGTTACG TGAACAAAAT CACCAAAGTT  
1501 CTGGATGAAA TTGACATCAA GTACTCCATC TTCACTGATA TCAAATCCGA CCCAACGATT

|      |            |            |            |            |            |             |
|------|------------|------------|------------|------------|------------|-------------|
| 1561 | GATAGCGTGA | AAAAGGGCGC | TAAAGAAATG | CTGAACTTTG | AACCGGACAC | CATCATCAGC  |
| 1621 | ATCGGTGGTG | GCTCTCCTAT | GGATGCTGCG | AAGGTCATGC | ACCTGCTGTA | CGAATACCCG  |
| 1681 | GAAGCGGAAA | TCGAAAACCT | GGCTATCAAC | TTCATGGACA | TCCGCAAACG | TATCTGCAAC  |
| 1741 | TTCCCGAAGC | TGGGCACTAA | AGCTATTTCC | GTTGCCATCC | CGACTACCGC | GGGCACTGGT  |
| 1801 | TCCGAAGCCA | CGCCGTTTCG | CGTGATCACC | AACGATGAAA | CCGGTATGAA | ATACCCGCTG  |
| 1861 | ACCTCTTACG | AACTGACCCC | GAACATGGCA | ATTATCGACA | CCGAGCTGAT | GCTGAACATG  |
| 1921 | CCGCGCAAGC | TGACCGCTGC | TACCGGCATC | GACGCTCTGG | TACATGCTAT | TGAGGCGTAC  |
| 1981 | GTTTCCGTGA | TGGTACCGA  | TTACACCGAC | GAAGTGGCCC | TGCGTGCGAT | CAAAAATGATT |
| 2041 | TTCAAGTACC | TGCCTCGCGC | TTACAAAAAC | GGCACGAATG | ACATCGAGGC | GCGTGAGAAA  |
| 2101 | ATGGCCCATG | CAAGCAACAT | CGCGGGCATG | GCCTTCGCCA | ACGCGTTTCT | GGGCGTGTGC  |
| 2161 | CACTCTATGG | CTCACAAACT | GGGTGCTATG | CACCACGTGC | CGCACGGTAT | CGCGTGTGCT  |
| 2221 | GTCCTGATCG | AAGAAGTAAT | TAAGTACAAC | GCTACTGATT | GCCCCACTAA | ACAGACCGCC  |
| 2281 | TTCCACAGT  | ACAAATCTCC | TAACGCTAAA | CGTAAGTACG | CTGAGATCGC | CGAATACCTG  |
| 2341 | AACCTGAAGG | GTACGAGCGA | CACTGAGAAA | GTTACTGCGC | TGATCGAAGC | TATCTCTAAA  |
| 2401 | CTGAAAATTG | ACCTGTCCAT | CCCGCAGAAC | ATCAGCGCCG | CAGGCATCAA | CAAAAAGGAC  |
| 2461 | TTTTACAACA | CGCTGGACAA | AATGAGCGAA | CTGGCTTTTG | ACGACCAGTG | CACCACTGCA  |
| 2521 | AACCCGCGTT | ACCCGCTGAT | CTCTGAGCTG | AAAGACATTT | ATATCAAATC | TTTTTAA     |

### AdhE2.3 (76932)

|      |            |             |             |            |            |             |
|------|------------|-------------|-------------|------------|------------|-------------|
| 1    | ATGAAAGTGA | CGAACCAAAA  | AGAAGTAAA   | CAAAAAGTGA | ATGAACTGCG | TGAGGCCAG   |
| 61   | AAAAAGTTTC | CTACGTATAC  | CCAGGAGCAA  | GTTGACAAGA | TCTTCAAACA | GTGTGCCATT  |
| 121  | GCGGCTGCCA | AAGAGCGTAT  | TAACCTGGCC  | AAACTGGCGG | TGGAAGAAAC | CGGCATCGGT  |
| 181  | CTGGTCGAGG | ACAAGATTAT  | CAAGAATCAC  | TTTGCCCGCG | AGTATATCTA | CAACAAATAC  |
| 241  | AAAAACGAAA | AGACTTGCGG  | CATCATTGAT  | CATGATGACA | GCTTGGGTAT | CACGAAAGTC  |
| 301  | GCAGAACCAA | TCGGTATTGT  | CGCGGCAATT  | GTCCCGACCA | CTAATCCGAC | CAGCACCGCG  |
| 361  | ATCTTCAAGA | GCTTGATCAG  | CCTGAAAAAC  | CGCAACGCGA | TTTTCTTCAG | CCCGCACCCG  |
| 421  | CGTGCGAAGA | AGAGCACCAT  | CGCAGCGGCG  | AAGCTGATTT | TGGATGCCGC | GGTTAAGGCC  |
| 481  | GGTGCACCGA | AAAACATTAT  | TGGCTGGATT  | GACGAGCCGA | GCATTGAGCT | GTCTCAGGAC  |
| 541  | CTGATGAGCG | AAGCGGACAT  | TATCTGGGCC  | ACCGGTGGTC | CGTCTATGGT | TAAGGCAGCG  |
| 601  | TACTCCAGCG | GTAAGCCTGC  | TATCGGCGTT  | GGTGCGGGCA | ATACGCCGGC | TATCATCGAT  |
| 661  | GAAAGCGCGG | ATATTGATAT  | GGCAGTTAGC  | TCCATCATT  | TGGGTAAAAC | CTACGACAAT  |
| 721  | GGTGTATCT  | GTGCAAGCGA  | GCAAAGCATC  | CTGGTGATGA | ATAGCATTTA | CGAGAAGTTC  |
| 781  | AAAGAAGAGT | TTGTTAAGCG  | TGGTTCCCTAT | ATTCTGAACC | AGAACGAGAT | TGCAAAAATC  |
| 841  | AAAGAAACGA | TGTTAAGAA   | TGGCGCGATT  | AATGCAGATA | TTGTTGGTAA | GTCCGCATAC  |
| 901  | ATTATCGCGA | AGATGGCGGG  | TATCGAAGTG  | CCGCAATACA | CCAAAATCTT | GATCGGCGAA  |
| 961  | GTGCAGAGCG | TGGAGAAGAG  | CGAACTGTTC  | AGCCATGAGA | AACTGAGCCC | GGTTCTGGCT  |
| 1021 | ATGTACAAAG | TGAAGGACTT  | TGACGAAGCC  | CTGAAGAAAG | CTCAGCGTCT | GATTGAGCTG  |
| 1081 | GGCGGCAGCG | GTACACAGAG  | CAGCCTGTAT  | ATCGATAGCC | AAAACAATAA | GGACAAGGTG  |
| 1141 | AAATCCGTTC | GTCCTGGCGAT | GAAAACCTCT  | CGCACGTTTA | TCAACATGCC | GAGCAGCCAA  |
| 1201 | GGTGCAGAGC | GCGATCTGTA  | TAACCTCGCA  | ATCGCGCCTT | CTTTTACGCT | GGGTTGCGGT  |
| 1261 | ACCTGGGAGG | GTAATTTCGGT | GAGCCAGAAT  | GTCGAGCCGA | AGCACCTGCT | GAACATCAAA  |
| 1321 | TCGGTCGCGG | AGCGCCGTGA  | GAAGAGACCG  | TGTTTCAAAG | TCCCACAGAA | AATTTACTTC  |
| 1381 | AAATACGGCT | GCCTGCGTTT  | CGCGCTGAAA  | GAAGTGAAG  | ACATGAACAA | AAAGCGTGCG  |
| 1441 | TTCATTGTTA | CCGACAAAAG  | CCTGTTCAAA  | CTGGGTTACG | TGAACAAAAT | CACCAAAGTT  |
| 1501 | CTGGATGAAA | TTGACATCAA  | GTACTCCATC  | TTCACTGATA | TCAAATCCGA | CCCAACGATT  |
| 1561 | GATAGCGTGA | AAAAGGGCGC  | TAAAGAAATG  | CTGAACTTTG | AACCGGACAC | CATCATCAGC  |
| 1621 | ATCGGTGGTG | GCTCTCCTAT  | GGATGCTGCG  | AAGGTCATGC | ACCTGCTGTA | CGAATACCCG  |
| 1681 | GAAGCGGAAA | TCGAAAACCT  | GGCTATCAAC  | TTCATGGACA | TCCGCAAACG | TATCTGCAAC  |
| 1741 | TTCCCGAAGC | TGGGCACTAA  | AGCTATTTCC  | GTTGCCATCC | CGACTACCGC | GGGCACTGGT  |
| 1801 | TCCGAAGCCA | CGCCGTTTCG  | CGTGATCACC  | AACGATGAAA | CCGGTATGAA | ATACCCGCTG  |
| 1861 | ACCTCTTACG | AACTGACCCC  | GAACATGGCA  | ATTATCGACA | CCGAGCTGAT | GCTGAACATG  |
| 1921 | CCGCGCAAGC | TGACCGCTGC  | TACCGGCATC  | GACGCTCTGG | TACATGCTAT | TGAGGCGTAC  |
| 1981 | GTTTCCGTGA | TGGTACCGA   | TTACACCGAC  | GAAGTGGCCC | TGCGTGCGAT | CAAAAATGATT |
| 2041 | TTCAAGTACC | TGCCTCGCGC  | TTACAAAAAC  | GGCACGAATG | ACATCGAGGC | GCGTGAGAAA  |
| 2101 | ATGGCCCATG | CAAGCAACAT  | CGCGGGCATG  | GCCTTCGCCA | ACGCGTTTCT | GGGCGTGTGC  |
| 2161 | CACTCTATGG | CTCACAAACT  | GGGTGCTATG  | CACCACGTGC | CGCACGGTAT | CGCGTGTGCT  |
| 2221 | GTCCTGATCG | AAGAAGTAAT  | TAAGTACAAC  | GCTACTGATT | GCCCCACTAA | ACAGACCGCC  |
| 2281 | TTCCACAGT  | ACAAATCTCC  | TAACGCTAAA  | CGTAAGTACG | CTGAGATCGC | CGAATACCTG  |
| 2341 | AACCTGAAGG | GTACGAGCGA  | CACTGAGAAA  | GTTACTGCGC | TGATCGAAGC | TATCTCTAAA  |
| 2401 | CTGAAAATTG | ACCTGTCCAT  | CCCGCAGAAC  | ATCAGCGCCG | CAGGCATCAA | CAAAAAGGAC  |
| 2461 | TTTTACAACA | CGCTGGACAA  | AATGAGCGAA  | CTGGCTTTTG | ACGACCAGTG | CACCACTGCA  |
| 2521 | AACCCGCGTT | ACCCGCTGAT  | CTCTGAGCTG  | AAAGACATTT | ATATCAAATC | TTTTTAA     |

## AdhE2.4 (76933)

1 ATGAAAAGTGA CGAACCAAAA AGAACTGAAA CAAAAACTGA ATGAACTGCG TGAGGCCAG  
61 AAAAAAGTTCG CTACGTATAC CCAGGAGCAA GTTGACAAGA TCTTCAAACA GTGTGCCATT  
121 GCGGCTGCCA AAGAGCGTAT TAACTTGGCC AACTTGGCGG TGAAGAAAC CGGCATCGGT  
181 CTGGTCGAGG ACAAGATTAT CAAGAATCAC TTTGCCGCGG AGTATATCTA CAACAAATAC  
241 AAAAAACGAAA AGACTTGC GG CATCATTGAT CATGATGACA GCTTGGGTAT CACGAAAGTC  
301 GCAGAACCAA TCGGTATTGT CGCGGCAATT GTCCCGACCA CTAATCCGAC CAGCACC GCG  
361 ATCTTCAAGA GCTTGATCAG CCTGGCGACC CGCAACGCGA TTTTCTTCAG CCCGCACCCG  
421 CGTGCGAAGA AGAGCACCAT CGCAGCGGCG AAGCTGATTT TGGATGCCGC GGTAAAGGCC  
481 GGTGCACCGA AAAACATTAT TGGCTGGATT GACGAGCCGA GCATTGAGCT GTCTCAGGAC  
541 CTGATGAGCG AAGCGGACAT TATTCTGGCC ACCGGTGGTC CGTCTATGGT TAAGGCAGCG  
601 TACTCCAGCG GTAAGCCTGC TATCGGCGCG GGTGCGGGCA ATACGCCGGC TATCATCGAT  
661 GAAAGCGCGG ATATTGATAT GGCAGTTAGC TCCATCATTG TGTCCAAAAC CTACGACAAT  
721 GGTGTTATCT GTGCAAGCGA GCAAAGCATC CTGGTGATGA ATAGCATTTA CGAGAAGGTC  
781 AAAGAAAGAGT TTGTTAAGCG TGTTTCTTAT ATTCTGAACC AGAACGCGAT TGCAAAAATC  
841 AAAGAAACGA TGTTAAGAA TGCGCGGATT AATGCAGATA TTGTTGGTAA GTCCGCATAC  
901 ATTATCGCGA AGATGGCGGG TATCGAAGTG CCGCAAACCA CCAAATCTT GATCGGCGAA  
961 GTGCAGAGCG TGGAGAAGAG CGAACTGTTC AGCCATGAGA AACTGAGCCC GGTCTGGCT  
1021 ATGTACAAA TGAAGGACTT TGACGAAGCC CTGAAGAAAG CTCAGCGTCT GATTGAGCTG  
1081 GCGGCGAGCG GTCACACGAG CAGCCTGTAT ATCGATAGCC AAAACAATAA GGACAAGGTG  
1141 AAAGAGTTTCG GTCTGGCGAT GAAAACCTCT CGCACGTTTA TCAACATGCC GAGCAGCCAA  
1201 GGTGCGAGCG GCGATCTGTA TAACTTCGCA ATCGCGCCTT CTTTTACGCT GGGTTGCGGT  
1261 ACCTGGGGCG GTAATTCGGT GAGCCAGAAT GTCGAGCCGA AGCACCTGCT GAACATCAA  
1321 TCGGTCGCGG AGCGCCGTGA GAAGAGACCG TGTTCAAAG TCCCACAGAA AATTTACTTC  
1381 AAATACGGCT GCCTGCGTTT CGCGCTGAAA GAACTGAAAG ACATGAACAA AAAGCGTGCG  
1441 TTCATTGTTA CCGACAAAAG CCTGTTCAAA CTGGGTTACG TGAACAAAAT CCCAAAGTT  
1501 CTGGATGAAA TTGACATCAA GTACTCCATC TTTACTGATA TCAAATCCGA CCAACGATT  
1561 GATAGCGTGA AAAAGGGCGC TAAAGAAATG CTGAACTTTG AACCGGACAC CATCATCAGC  
1621 ATCGGTGGTG GCTCTCCTAT GGATGCTGCG AAGGTCATGC ACCTGCTGTA CGAATACCCG  
1681 GAAGCGGAAA TCGAAAACCT GGCTATCAAC TTCATGGACA TCCGAAACG TATCTGCAAC  
1741 TTCCGAAGC TGGGCACTAA AGCTATTTCC GTTGCCATCC CGACTACCGC GGGCACTGGT  
1801 TCCGAAGCCA CGCCGTTGCG CGTGATCACC AACGATGAAA CCGGTATGAA ATACCCGCTG  
1861 ACCTCTTACC AACTGACCCC GAACATGGCA ATTATCGACA CCGAGCTGAT GCTGAACATG  
1921 CCGCGCAAGC TGACCGCTGC TACCGGCATC GACGCTCTGG TACATGCTAT TGAGGCGTAC  
1981 GTTCCCGTGA TGGTACCGA TTACACCGAC GAACTGGCCC TGCGTGCAT CAAAATGATT  
2041 TTCAAGTACC TGCCCTCGCG TTACAAAAC GGCACGAATG ACATCGAGGC GCGTGAGAAA  
2101 ATGGCCATG CAAGCAACAT CGGGGCGATG GCCTTCGCCA ACGCGTTCC TGGCGTGTGC  
2161 CACTCTATGG CTCACAAACT GGGTGTATG CACCACGTGC CGCACGGTAT CGCGTGTGCT  
2221 GTCTGATCG AAGAAGTAAT TAAGTACAAC GCTACTGATT GCCCGACTAA ACAGACCCG  
2281 TTCCCACAGT ACAAATCTCC TAACGCTAAA CGTAAGTACG CTGAGATCGC CGAATACCTG  
2341 AACCTGAAAG GTACGAGCGA CACTGAGAAA GTTACTGCGC TGATCGAAGC TATCTCTAAA  
2401 CTGAAAATTG ACCTGTCCAT CCCGAGAAC ATCAGCGCCG CAGGCATCAA CAAAAGGAC  
2461 TTTTACAACA CGCTGGACAA AATGAGCGAA CTGGCTTTTG ACGACCAGTG CACCACTGCA  
2521 AACCCGCGTT ACCCGCTGAT CTCTGAGCTG AAAGACATTT ATATCAAATC TTTTAA

## AdhE2.5 (76934)

1 ATGAAAAGTGA CGAACCAAAA AGAACTGAAA CAAAAACTGA ATGAACTGCG TGAGGCCAG  
61 AAAAAAGTTCG CTTGCTATAC CCAGGACCAA GTTGACAAGA TCTTCAAACA GTGTGCCATT  
121 GCGGCTGCCA AAGAGCGTAT TAACTTGGCC GAGCTGGCGG TGAAGAAAC CGGCATCGGT  
181 CTGGTCGAGG ACAAGATTAT CAAGAATCAC TTTGCCGCGG AGTATATCTA CAACAAATAC  
241 AAAAAACGAAA AGACTTGC GG CATCATTGAT CATGATGACA GCTTGGGTAT CACGAAAGTC  
301 GCAGAACCAA TCGGTATTGT CGCGGCAATT GTCCCGACCA CTAATCCGAC CAGCACC GCG  
361 ATCTTCAAGA GCTTGATCAG CCTGAAAAC CGCAACGCGA TTTTCTTCAG CCCGCACCCG  
421 CGTGCGAAGA AGAGCACCAT CGCAGCGGCG AAGCTGATTT TGGATGCCGC GGTAAAGGCC  
481 GGTGCACCGA AAAACATTAT TGGCTGGATT GACGAGCCGA GCATTGAGCT GTCTCAGGAC  
541 CTGATGAGCG AAGCGGACAT TATTCTGGCC ACCGGTGGTC CGTCTATGGT TAAGGCAGCG  
601 TACTCCAGCG GTAAGCCTGC TATCGGCGTT GGTGCGGGCA ATACGCCGGC TATCATCGAT  
661 GAAAGCGCGG ATATTGATAT GGCAGTTAGC TCCATCATTG TGTCCAAAAC CTACGACAAT  
721 GGTGTTATCT GTGCAAGCGA GCAAAGCATC CTGGTGATGA ATAGCATTTA CGAGAAGGTC  
781 AAAGAAAGAGT TTGTTAAGCG TGTTTCTTAT ATTCTGAACC AGAACGAGAT TGCAAAAATC

841 AAAGAAACGA TGTTAAGAA TGGCGCGATT AATGCAGATA TTGTTGGTAA GTCCGCATAC  
901 ATTATCGCGA AGATGGCGGG TATCGAAGTG CCGCAAACCA CCAAATCTT GATCGGCGAA  
961 GTGCAGAGCG TGGAGAAGAG CGAACTGTTC AGCCATGAGA AACTGAGCCC GGTCTGGCT  
1021 ATGTACAAAG TGAAGACTT TGACGAAGCC CTGAAGAAAG CTCAGCGTCT GATTGAGCTG  
1081 GGCGGCAGCG GTCACACGAG CAGCCTGTAT ATCGATAGCC AAAACAATAA GGACAAGGTG  
1141 AAAGAGTTCG GTCTGGCGAT GAAAACCTCT CGCACGTTTA TCAACATGCC GAGCAGCCAA  
1201 GGTGCGAGCG GCGATCTGTA TAACTTCGCA ATCGCGCCTT CTTTTACGCT GGGTTGCGGT  
1261 ACCTGGGGCG GTAATTCGGT GAGCCAGAAT GTCGAGCCGA AGCACCTGCT GAACATCAAA  
1321 TCGGTGCGGG AGCGCCGTGA GAAGAGACCG TGGTTCAAAG TCCCACAGAA AATTTACTTC  
1381 AAATACGGCT GCCTGCGTTT CGCGCTGAAA GAACTGAAAG ACATGAACAA AAAGCGTGCG  
1441 TTCATTGTTA CCGACAAAGA CCTGTTCAAA CTGGGTTACG TGAACAAAAT CACCAAAGTT  
1501 CTGGATGAAA TTGACATCAA GTACTCCATC TTCACTGATA TCAAATCCGA CCCAACGATT  
1561 GATAGCGTGA AAAAGGGCGC TAAAGAAATG CTGAACTTTG AACCGGACAC CATCATCAGC  
1621 ATCGGTGGTG GCTCTCCTAT GGATGCTGCG AAGGTCATGC ACCTGCTGTA CGAATACCCG  
1681 GAAGCGGAAA TCGAAAACCT GGCTATCAAC TTCATGGACA TCCGCAAACG TATCTGCAAC  
1741 TTCCCAGAAC TGGGCACTAA AGCTATTTCC GTTGCCATCC CGACTACCGC GGGCACTGGT  
1801 TCCGAAGCCA CGCCGTTGCG CGTGATCACC AACGATGAAA CCGGTATGAA ATACCCGCTG  
1861 ACCCTTACG AACTGACCCC GAACATGGCA ATTATCGACA CCGAGCTGAT GCTGAACATG  
1921 CCGCGCAAGC TGACCGCTGC TACCGGCATC GACGCTCTGG TACATGCTAT TGAGGCGTAC  
1981 GTTCCCGTGA TGGTACCAGA TTACACCGAC GAACTGGCCC TGCGTGCGAT CAAAATGATT  
2041 TTCAAGTACC TGCCTCGCGC TTACAAAAAC GGCACGAATG ACATCGAGGC GCGTGAGAAA  
2101 ATGGCCCATG CAAGCAACAT CGCGGGCATG GCCTTCGCCA ACGCGTTCC TGGCGTGTGC  
2161 CACTCTATGG CTCACAAACT GGGTGCTATG CACCACGTGC CGCACGGTAT CGCGTGTGCT  
2221 TCCTGATCG AAGAAGTAAT TAAGTACAAC GCTACTGATT GCCCGACTAA ACAGACCCGC  
2281 TTCCCACAGT ACAAATCTCC TAACGCTAAA CGTAAGTACG CTGAGATCGC CGAATACCTG  
2341 AACCTGAAGG GTACGAGCGA CACTGAGAAA GTTACTGCGC TGATCGAAGC TATCTCTAAA  
2401 CTGAAAATTG ACCTGTCCAT CCCGCGAAGC ATCAGCGCCG CAGGCATCAA CAAAAGGAC  
2461 TTTTACAACA CGCTGGACAA AATGAGCGAA CTGGCTTTTG ACGACCAGTG CACCACTGCA  
2521 AACCCGCGTT ACCCGCTGAT CTCTGAGCTG AAAGACATTT ATATCAAATC TTTTTTAA

**AdhE2.7 (76936)**

1 ATGAAAGTGA CGAACCAAAA AGAACTGAAA CAAAACTGA ATGAACTGCG TGAGGCCAG  
61 AAAAAGTTCG CTACGTATAC CCAGGAGCAA GTTGACAAGT TCTTCAAACA GTGTGCCATT  
121 GCGGCTGCCA AAGAGCGTAT TAACTTGGCC AAACTGGCGG TGAAGAAAC CGGCATCGGT  
181 CTGGTCGAGG ACAAGATTAT CAAGAATCAC TTTGCCGCGG AGTATATCTA CAACAAATAC  
241 AAAAACGAAA AGACTTGCGG CATCATTGAT CATGATGACA GCTTGGGTAT CACGAAAGTC  
301 GCAGAACCAA TCGGTATTGT CGCGGCAATT GTCCCGACCA CTAATCCGAC CAGCACCCG  
361 ATCTTCAAGA GCTTGATCAG CCTGAAAACC CGCAACGCGA TTTTCTTCAG CCCGACCCG  
421 CGTGCGAAGA AGAGCACCAT CGCAGCGCGC AAGCTGATTT TGGATGCCCG GGTAAAGGCC  
481 GGTGCACCGA AAAACATTAT TGGCTGGATT GACGAGCCGA GCATTGAGCT GTCTCAGGAC  
541 CTGATGAGCG AAGCGGACAT TATTCTGGCC ACCGGTGGTC CGTCTATGGT TAAGGCAGCG  
601 TACTCCAGCG GTAAGCCTGC TATCGGCGTT GGTGCGGGCA ATACGCCGGC TATCATCGAT  
661 GAAAGCGCGG ATATTGATAT GGCAGTTAGC TCCATCATTC TGTCCAAAAC CTACGACAAT  
721 GGTGTTATCT GTGCAAGCGA GCAAAGCATC CTGGTGATGA ATAGCATTTA CGAGAAGGTC  
781 AAAGAAGAGT TTGTTAAGCG TGGTTCCTAT ATTCTGAACC AGAACGAGAT TGCAAAATC  
841 AAAGAAACGA TGTTAAGAA TGGCGCGATT AATGCAGATA TTGTTGGTAA GTCCGCATAC  
901 ATTATCGCGA AGATGGCGGG TATCGAAGTG CCGCAAACCA CCAAATCTT GATCGGCGAA  
961 GTGCAGAGCG TGGAGAAGAG CGAACTGTTC AGCCATGAGA AACTGAGCCC GGTCTGGCT  
1021 ATGTACAAAG TGAAGACTT TGACGAAGCC CTGAAGAAAG CTCAGCGTCT GATTGAGCTG  
1081 GGCGGCAGCG GTCACACGAG CAGCCTGTAT ATCGATAGCC AAAACAATAA GGACAAGGTG  
1141 AAAGAGTTCG GTCTGGAGAT GAAAACCTCT CGCTTCTTTA TCAACATGCC GAGCAGCCAA  
1201 GGTGCGAGCG GCGATCTGTA TAACTTCGCA ATCGCGCCTT CTTTTACGCT GGGTTGCGGT  
1261 ACCTGGGGCG GTAATTCGGT GAGCCAGAAT GTCGAGCCGA AGCACCTGCT GAACATCAAA  
1321 TCGGTGCGGG AGCGCCGTGA GAAGAGACCG TGGTTCAAAG TCCCACAGAA AATTTACTTC  
1381 AAATACGGCT GCCTGCGTTT CGCGCTGAAA GAACTGAAAG ACATGAACAA AAAGCGTGCG  
1441 TTCATTGTTA CCGACAAAGA CCTGTTCAAA CTGGGTTACG TGAACAAAAT CACCAAAGTT  
1501 CTGGATGAAA TTGACATCAA GTACTCCATC TTCACTGATA TCAAATCCGA CCCAACGATT  
1561 GATAGCGTGA AAAAGGGCGC TAAAGAAATG CTGAACTTTG AACCGGACAC CATCATCAGC  
1621 ATCGGTGGTG GCTCTCCTAT GGATGCTGCG AAGGTCATGC ACCTGCTGTA CGAATACCCG  
1681 GAAGCGGAAA TCGAAAACCT GGCTATCAAC TTCATGGACA TCCGCAAACG TATCTGCAAC  
1741 TTCCCAGAAC TGGGCACTAA AGCTATTTCC GTTGCCATCC CGACTACCGC GGGCACTGGT  
1801 TCCGAAGCCA CGCCGTTGCG CGTGATCACC AACGATGAAA CCGGTATGAA ATACCCGCTG  
1861 ACCTCTTACG AACTGACCCC GAACATGGCA ATTATCGACA CCGAGCTGAT GCTGAACATG

|      |            |            |            |            |            |            |
|------|------------|------------|------------|------------|------------|------------|
| 1921 | CCGCGCAAGC | TGACCGCTGC | TACCGGCATC | GACGCTCTGG | TACATGCTAT | TGAGGCGTAC |
| 1981 | GTTTCCGTGA | TGGCTACCGA | TTACACCGAC | GAAGTGGCCC | TGCGTGCGAT | CAAAATGATT |
| 2041 | TTCAAGTACC | TGCCCTCGCG | TTACAAAAAC | GGCACGAATG | ACATCGAGGC | GCGTGAGAAA |
| 2101 | ATGGCCCATG | CAAGCAACAT | CGCGGGCATG | GCCTTCGCCA | ACGCGTTCCT | GGGCGTGTGC |
| 2161 | CACTCTATGG | CTCACAAACT | GGGTGCTATG | CACCACGTGC | CGCACGGTAT | CGCGTGTGCT |
| 2221 | GTCCTGATCG | AAGAAGTAAT | TAAGTACAAC | GCTACTGATT | GCCCCACTAA | ACAGACCGCC |
| 2281 | TTCCACAGT  | ACAAATCTCC | TAACGCTAAA | CGTAAGTACG | CTGAGATCGC | CGAATACCTG |
| 2341 | AACCTGAAGG | GTACGAGCGA | CACTGAGAAA | GTTACTGCGC | TGATCGAAGC | TATCTCTAAA |
| 2401 | CTGAAAATTG | ACCTGTCCAT | CCCGCAGAAC | ATCAGCGCCG | CAGGCATCAA | CAAAAAGGAC |
| 2461 | TTTTACAACA | CGCTGGACAA | AATGAGCGAA | CTGGCTTTTG | ACGACCAGTG | CACCACTGCA |
| 2521 | AACCCGCGTT | ACCCGCTGAT | CTCTGAGCTG | AAAGACATTT | ATATCAAATC | TTTTTAA    |

**AdhE2.8 (76937)**

|      |             |             |             |             |            |             |
|------|-------------|-------------|-------------|-------------|------------|-------------|
| 1    | ATGAAAGTGA  | CGAACCAAAA  | AGAAGTAAAA  | CAAAAAGTGA  | ATGAAAGTGG | TGAGGCCCGAG |
| 61   | AAAAAGTTTCG | CTACGTATAC  | CCAGGAGCAA  | GTTGACAAGA  | TCTTCAAACA | GTGTGCCATT  |
| 121  | GCGGCTGCCA  | AAGAGCGTAT  | TAAGTGGGCC  | AAAGTGGCGG  | TGGAAGAAAC | CGGCATCGGT  |
| 181  | CTGGTCGAGG  | ACAAGATTAT  | CAAGAATCAC  | TTTGCCGCGG  | AGTATATCTA | CAACAAATAC  |
| 241  | AAAAACGAAA  | AGACTTGGCG  | CATCATTGAT  | CATGATGACA  | GCTTGGGTAT | CACGAAAGTC  |
| 301  | GCAGAACCAA  | TCGGTATTGT  | CGCGGCAATT  | GTCCCGACCA  | CTAATCCGAC | CAGCACCGCG  |
| 361  | ATCTTCAAGA  | GCTTGATCAG  | CCTGAAAACC  | CGCAACGCGA  | TTTTCTTCAG | CCCGCACCCG  |
| 421  | CGTGCGAAGA  | AGAGCACCAT  | CGCAGCGCGC  | AAGCTGATTT  | TGGATGCCGC | GGTAAAGGCC  |
| 481  | GGTGACCGA   | AAAACATTAT  | TGGCTGGATT  | GACGAGCCGA  | GCATTGAGCT | GTCTCAGGAC  |
| 541  | CTGATGAGCG  | AAGCGGACAT  | TATTCTGGCC  | ACCGGTGGTC  | CGTCTATGGT | TAAGGCAGCG  |
| 601  | TACTCCAGCG  | GTAAGCCTGC  | TATCGGCGTT  | GGTGGGGGCA  | ATACGCCGGC | TATCATCGAT  |
| 661  | GAAAGCGCGG  | ATATTGATAT  | GGCAGTTAGC  | TCCATCATTC  | TGTCCAAAAC | CTACGACAAT  |
| 721  | GGTGTATCT   | GTGCAAGCGA  | GCAAAGCATC  | CTGGTGATGA  | ATAGCATTTA | CGAGAAGGTC  |
| 781  | AAAGCGGAGT  | TTGTTAAGCG  | TGGTTCCTAT  | ATTCTGAACC  | AGGAGGAGAT | TGCAAAAATC  |
| 841  | AAAGAAACGA  | TGTTAAGAA   | TGGCGCGATT  | AATGCAGATA  | TGTTGGTAA  | GTCCGATAC   |
| 901  | ATTATCGCGA  | AGATGGCGGG  | TATCGAAGTG  | CCGCAAAACCA | CCAAAATCTT | GATCGGCGAA  |
| 961  | GTGCAGAGCG  | TGGAGAAGAG  | CGAACTGTTC  | AGCCATGAGA  | AACTGAGCCC | GGTCTGGCT   |
| 1021 | ATGTACAAAG  | TGAAGGACTT  | TGACGAAGCC  | CTGAAGCTGG  | CTCAGCGTCT | GATTGAGCTG  |
| 1081 | GGCGGAGCG   | GTCACACGAG  | CAGCCTGTAT  | ATCGATAGCC  | AAAACAATAA | GGACAAGGTG  |
| 1141 | AAAGAGTTTCG | GTCTGGCGAT  | GAAAACCTCT  | CGCACGTTTA  | TCAACATGCC | GAGCAGCCAA  |
| 1201 | GGTGGAGCG   | GCGATCTGTA  | TAAGTTCGTA  | ATCGCGCCTT  | CTTTTACGCT | GGGTGGCGGT  |
| 1261 | ACCTGGGGCG  | GTAATTTCGGT | GAGCCAGAAT  | GTCGAGCCGA  | AGCACCTGCT | GAACATCAAA  |
| 1321 | TCGGTCGCGG  | AGCGCCGTGA  | GAAGAGACCG  | TGGTTCAAAG  | TCCCACAGAA | AATTTACTTC  |
| 1381 | AAATACGGCT  | GCCTGCGTTT  | CGCGCTGAAA  | GAAGTGAAG   | ACATGAACAA | AAAGCGTGCG  |
| 1441 | TTCATTGTTA  | CCGACAAAGA  | CCTGTTCAAA  | CTGGGTTACG  | TGAACAAAAT | CACCAAAGTT  |
| 1501 | CTGGATGAAA  | TTGACATCAA  | GTAAGTCCATC | TTCATGATA   | TCAAATCCGA | CCCAACGATT  |
| 1561 | GATAGCGTGA  | AAAAGGGCGC  | TAAAGAAATG  | CTGAAGTTTG  | AACCGGACAC | CATCATCAGC  |
| 1621 | ATCGGTGGTG  | GCTCTCCTAT  | GGATGCTGCG  | AAGGTGATGC  | ACCTGCTGTA | CGAATACCCG  |
| 1681 | GAAGCGGAAA  | TCGAAAACCT  | GGCTATCAAC  | TTCATGGACA  | TCCGCAAACG | TATCTGCAAC  |
| 1741 | TTCCCGAAGC  | TGGGCACTAA  | AGCTATTTCC  | GTTGCCATCC  | CGACTACCGC | GGGCACTGGT  |
| 1801 | TCCGAAGCCA  | CGCCGTTTCG  | CGTGATCACC  | AACGATGAAA  | CCGGTATGAA | ATACCCGCTG  |
| 1861 | ACCTCTTACG  | AACTGACCCC  | GAACATGGCA  | ATTATCGACA  | CCGAGCTGAT | GCTGAACATG  |
| 1921 | CCGCGCAAGC  | TGACCGCTGC  | TACCGGCATC  | GACGCTCTGG  | TACATGCTAT | TGAGGCGTAC  |
| 1981 | GTTTCCGTGA  | TGGCTACCGA  | TTACACCGAC  | GAAGTGGCCC  | TGCGTGCGAT | CAAAATGATT  |
| 2041 | TTCAAGTACC  | TGCCCTCGCG  | TTACAAAAAC  | GGCACGAATG  | ACATCGAGGC | GCGTGAGAAA  |
| 2101 | ATGGCCCATG  | CAAGCAACAT  | CGCGGGCATG  | GCCTTCGCCA  | ACGCGTTCCT | GGGCGTGTGC  |
| 2161 | CACTCTATGG  | CTCACAAACT  | GGGTGCTATG  | CACCACGTGC  | CGCACGGTAT | CGCGTGTGCT  |
| 2221 | GTCCTGATCG  | AAGAAGTAAT  | TAAGTACAAC  | GCTACTGATT  | GCCCCACTAA | ACAGACCGCC  |
| 2281 | TTCCACAGT   | ACAAATCTCC  | TAACGCTAAA  | CGTAAGTACG  | CTGAGATCGC | CGAATACCTG  |
| 2341 | AACCTGAAGG  | GTACGAGCGA  | CACTGAGAAA  | GTTACTGCGC  | TGATCGAAGC | TATCTCTAAA  |
| 2401 | CTGAAAATTG  | ACCTGTCCAT  | CCCGCAGAAC  | ATCAGCGCCG  | CAGGCATCAA | CAAAAAGGAC  |
| 2461 | TTTTACAACA  | CGCTGGACAA  | AATGAGCGAA  | CTGGCTTTTG  | ACGACCAGTG | CACCACTGCA  |
| 2521 | AACCCGCGTT  | ACCCGCTGAT  | CTCTGAGCTG  | AAAGACATTT  | ATATCAAATC | TTTTTAA     |

**AdhE2.9 (76938)**

|    |             |            |            |            |            |             |
|----|-------------|------------|------------|------------|------------|-------------|
| 1  | ATGAAAGTGA  | CGAACCAAAA | AGAAGTAAAA | CAAAAAGTGA | ATGAAAGTGG | TGAGGCCCGAG |
| 61 | AAAAAGTTTCG | CTACGTATAC | CCAGGAGCAA | GTTGACAAGA | TCTTCAAACA | GTGTGCCATT  |



|      |            |            |            |            |             |            |
|------|------------|------------|------------|------------|-------------|------------|
| 121  | GCGGCTGCCA | AAGAGCGTAT | TAACCTGGCC | AACTGGCGG  | TGGAAGAAAC  | CGGCATCGGT |
| 181  | CTGGTCGAGG | ACAAGATTAT | CAAGAATCAC | TTTGCCCGG  | AGTATATCTA  | CAACAAATAC |
| 241  | AAAAACGAAA | AGACTTGCGG | CATCATTGAT | CATGATGACA | GCTTGGGTAT  | CACGAAAGTC |
| 301  | GCAGAACCAA | TCGGTATTGT | CGCGGCAATT | GTCCCGACCA | CTAATCCGAC  | CAGCACCAGG |
| 361  | ATCTTCAAGA | GCTTGATCAG | CCTGAAAACC | CGCAACGCGA | TTTTCTTCAG  | CCCGCACCCG |
| 421  | CGTGCGAAGA | AGAGCACCAT | CGCAGCGGCG | AAGCTGATTT | TGGATGCCGC  | GGTAAAGGCC |
| 481  | GGTGCACCGA | AAAACATTAT | TGGCTGGATT | GACGAGCCGA | GCATTGAGCT  | GTCTCAGGAC |
| 541  | CTGATGAGCG | AAGCGGACAT | TATCTGGGCC | ACCGGTGGTC | CGTCTATGGT  | TAAGGCAGCG |
| 601  | TACTCCAGCG | GTAAGCCTGC | TATCGGCGTT | GGTGCGGGCA | ATACGCCGGC  | TATCATCGAT |
| 661  | GAAAGCGCGG | ATATTGATAT | GGCAGTTAGC | TCCATCATTC | TGTCCAAAAC  | CTACGACAAT |
| 721  | GGTGTATCT  | GTGCAAGCGA | GCAAAGCATC | CTGGTGATGA | ATAGCATTTA  | CGAGAAGGTC |
| 781  | AAAGAAGAGT | TTGTTAAGCG | TGGTTCCTAT | ATTCTGAACC | AGAACGAGAT  | TGCAAAAATC |
| 841  | AAAGAAACGA | TGTTAAGAA  | TGGCGCGATT | AATGCAGATA | TTGTTGGTAA  | GTCCGCATAC |
| 901  | ATTATCGCGA | AGATGGCGGG | TATCGAAGTG | CCGCAATACA | CCAAAATCTT  | GATCGGCGAA |
| 961  | GTGCAGCAGC | TGGAGAAGAG | CGAACTGTTC | AGCCATGAGA | AACTGAGCCC  | GGTCTGGCT  |
| 1021 | ATGTACAAAG | TGAAGGACTT | TGACGAAGCC | CTGAAGAAAG | CTCAGCGTCT  | GATTGAGCTG |
| 1081 | GGCGGCAGCG | GTCACACGAG | CAGCCTGTAT | ATCGATAGCC | AAAACAATAA  | GGACAAGGTG |
| 1141 | AAAGATTTCG | GTCTGGCGAT | GAAAACCTCT | CGCACGTTTA | TCAAACATGCC | GAGCAGCCAA |
| 1201 | GGTGCAGCG  | GCGATCTGTA | TAACCTCGCA | ATCGCGCCTT | CTTTTACGCT  | GGGTTGCCCG |
| 1261 | ACCTGGGGCG | GTAATTCGGT | GAGCCAGAAT | GTCGAGCCGA | AGCACCTGCT  | GAACATCAAA |
| 1321 | TCGGTCGCGG | AGCGCCGTGA | GAAGAGACCG | TGGTTCAAAG | TCCCACAGAA  | AATTTACTTC |
| 1381 | AAATACGGCT | GCCTGCGTTT | CGCGCTGAAA | GAAGTGAAG  | ACATGAACAA  | AAAGCGTGCG |
| 1441 | TTCATTGTTA | CCGACAAAGA | CCTGTTCAAA | CTGGGTTACG | TGAACAAAAT  | CACCAAAGTT |
| 1501 | CTGGATGAAA | TTGACATCAA | GTAATCCATC | TTCATGATA  | TCAAATCCGA  | CCCAACGATT |
| 1561 | GATAGCGTGA | AAAAGGGCGC | TAAAGAAATG | CTGAACTTTG | AACCGACAC   | CATCATCAGC |
| 1621 | ATCGGTGGTG | GCTCTCCTAT | GGATGCTGCG | AAGGTCATGC | ACCTGCTGTA  | CGAATACCCG |
| 1681 | GAAGCGGAAA | TCGAAAACCT | GGCTATCAAC | TTCATGGACA | TCCGAAAACG  | TATCTGCAAC |
| 1741 | TTCCGAAGC  | TGGGCACTAA | AGCTATTTCC | GTTGCCATCC | CGACTACCGC  | GGGCACTGGT |
| 1801 | TCCGAAGCCA | CGCCGTTGCG | CGTGATCACC | AACGATGAAA | CCGGTATGAA  | ATACCCGCTG |
| 1861 | ACCTCTTACG | AACTGACCCC | GAACATGGCA | ATTATCGACA | CCGAGCTGAT  | GCTGAACATC |
| 1921 | CCCGCAAGC  | TGACCGCTGC | TACCGGCATC | GACGCTCTGG | TACATGCTAT  | TGAGGCGTAC |
| 1981 | GTTTCCGTGA | TGGCTACCGA | TTACACCGAC | GAAGTGGCCC | TGCGTGCGAT  | CAAAATGATT |
| 2041 | TTCAAGTACC | TGCCCTCGCG | TTACAAAAC  | GGCACGAATG | ACATCGAGGC  | GCGTGAGAAA |
| 2101 | ATGGCCATG  | CAAGCAACAT | CGCGGGCATG | GCCTTCGCCA | ACGCGTTCCCT | GGGCGTGTGC |
| 2161 | CACTCTATGG | CTCACAACCT | GGGTGCTATG | CACCACGTGC | CGCACGGTAT  | CGCGTGTGCT |
| 2221 | GTCCTGATCG | AAGAAGTAAT | TAAGTACAAC | GCTACTGATT | GCCCCACTAA  | ACAGACCCGC |
| 2281 | TTCCACAGT  | ACAAATCTCC | TAACGCTAAA | CGTAAGTACG | CTGAGATCGC  | CGAATCCCTG |
| 2341 | AACCTGAAGG | GTACGAGCGA | CACTGAGAAA | GTTACTGCGG | TGATCGAAGC  | TATCTCTAAA |
| 2401 | CTGAAAATG  | ACCTGTCCAT | CCCGCAGAAC | ATCAGCGCCG | CAGGCATCAA  | CAAAAAGGAC |
| 2461 | TTTTACAACA | CGCTGGACAA | AATGAGCGAA | CTGGCTTTTG | ACGACCAGTG  | CACCACTGCA |
| 2521 | AACCCGCGTT | ACCCGCTGAT | CTCTGAGCTG | AAAGACATTT | ATATCAAATC  | TTTTTAA    |

**AdhE2.10 (76939)**

|      |            |            |            |            |            |             |
|------|------------|------------|------------|------------|------------|-------------|
| 1    | ATGAAAGTGA | CGAACCAAAA | AGAAGTAAA  | CAAAAAGTGA | ATGAACTGCG | TGAGGCCCGAG |
| 61   | AAAAAGTTCC | TGACGTATAC | CCAGGAGCAA | GTTGACAAGA | TCTTCAAACA | GTGTGCCATT  |
| 121  | GCGGCTGCCA | AAGAGCGTAT | TAACCTGGCC | AACTGGCGG  | TGGAAGAAAC | CGGCATCGGT  |
| 181  | CTGGTCGAGG | ACAAGATTAT | CAAGAATCAC | TTTGCCCGG  | AGTATATCTA | CAACAAATAC  |
| 241  | AAAAACGAAA | AGACTTGCGG | CATCATTGAT | CATGATGACA | GCTTGGGTAT | CACGAAAGTC  |
| 301  | GCAGAACCAA | TCGGTATTGT | CGCGGCAATT | GTCCCGACCA | CTAATCCGAC | CAGCACCAGG  |
| 361  | ATCTTCAAGA | GCTTGATCAG | CCTGAAAACC | CGCAACGCGA | TTTTCTTCAG | CCCGCACCCG  |
| 421  | CGTGCGAAGA | AGAGCACCAT | CGCAGCGGCG | AAGCTGATTT | TGGATGCCGC | GGTAAAGGCC  |
| 481  | GGTGCACCGA | AAAACATTAT | TGGCTGGATT | GACGAGCCGA | GCATTGAGCT | GTCTCAGGAC  |
| 541  | CTGATGAGCG | AAGCGGACAT | TATCTGGGCC | ACCGGTGGTC | CGTCTATGGT | TAAGGCAGCG  |
| 601  | TACTCCAGCG | GTAAGCCTGC | TATCGGCGTT | GGTGCGGGCA | ATACGCCGGC | TATCATCGAT  |
| 661  | GAAAGCGCGG | ATATTGATAT | GGCAGTTAGC | TCCATCATTC | TGTCCAAAAC | CTACGACAAT  |
| 721  | GGTGTATCT  | GTGCAAGCGA | GCAAAGCATC | CTGGTGATGA | ATAGCATTTA | CGAGAAGGTC  |
| 781  | AAAGAAGAGT | TTGTTAAGCG | TGGTTCCTAT | ATTCTGAACC | AGAACGAGAT | TGCAAAAATC  |
| 841  | AAAGAAACGA | TGTTAAGAA  | TGGCGCGATT | AATGCAGATA | TTGTTGGTAA | GTCCGCATAC  |
| 901  | ATTATCGCGA | AGATGGCGGG | TATCGAAGTG | CCGCAACCCA | CCAAAATCTT | GATCGGCGAA  |
| 961  | GTGCAGAGCG | TGGAGAAGAG | CGAACTGTTC | AGCCATGAGC | TGCTGAGCCC | GGTCTGGCT   |
| 1021 | ATGTACAAAG | TGAAGGACTT | TGACGAAGCC | CTGAAGAAAG | CTCAGCGTCT | GATTAACCTG  |
| 1081 | GGCGGCAGCG | GTCACACGAG | CAGCCTGTAT | ATCGATAGCC | AAAACAATAA | GGACAAGGTG  |

|      |            |            |            |            |            |            |
|------|------------|------------|------------|------------|------------|------------|
| 1141 | AAAGAGTTCG | GTCTGGCGAT | GAAAACCTCT | CGCACGTTTA | TCAACATGCC | GAGCAGCCAA |
| 1201 | GGTGCAGCG  | GCGATCTGTA | TAACCTCGCA | ATCGCGCCTT | CTTTTACGCT | GGGTTGCGGT |
| 1261 | ACCTGGGGCG | GTAATTCGGT | GAGCCAGAAT | GTCGAGCCGA | AGCACCTGCT | GAACATCAAA |
| 1321 | TCGGTCCGGG | AGCGCCGTGA | GAAGAGACCG | TGGTTCAAAG | TCCCACAGAA | AATTTACTTC |
| 1381 | AAATAACGGT | GCCTGCGTTT | CGCGCTGAAA | GAAGTCAAAG | ACATGAACAA | AAAGCGTGCG |
| 1441 | TTCATTGTTA | CCGACAAAGA | CCTGTTCAAA | CTGGGTTACG | TGAACAAAAT | CACCAAAGTT |
| 1501 | CTGGATGAAA | TTGACATCAA | GTACTCCATC | TTCATGATA  | TCAAATCCGA | CCCAACGATT |
| 1561 | GATAGCGTGA | AAAAGGGCGC | TAAAGAAATG | CTGAACCTTG | AACCGGACAC | CATCATCAGC |
| 1621 | ATCGGTGGTG | GCTCTCCTAT | GGATGCTGCG | AAGGTCATGC | ACCTGCTGTA | CGAATACCCG |
| 1681 | GAAGCGGAAA | TCGAAAACCT | GGCTATCAAC | TTCATGGACA | TCCGCAAACG | TATCTGCAAC |
| 1741 | TTCCCGAAGC | TGGGCACTAA | AGCTATTTCC | GTTGCCATCC | CGACTACCCG | GGGCGTGGT  |
| 1801 | TCCGAAGCCA | CGCCGTTCCG | CGTGATCACC | AACGATGAAA | CCGGTATGAA | ATACCCGCTG |
| 1861 | ACCTCTTACG | AACTGACCCC | GAACATGGCA | ATTATCGACA | CCGAGCTGAT | GCTGAACATG |
| 1921 | CCGCGCAAGC | TGACCGCTGC | TACCGGCATC | GACGCTCTGG | TACATGCTAT | TGAGGCGTAC |
| 1981 | GTTTCCGTGA | TGGTACCGA  | TTACACCGAC | GAAGTGGCCC | TGCGTGCGAT | CAAAATGATT |
| 2041 | TTCAAGTACC | TGCCTCGCGC | TTACAAAAAC | GGCACGAATG | ACATCGAGGC | GCGTGAGAAA |
| 2101 | ATGGCCCATG | CAAGCAACAT | CGCGGGCATG | GCCTTCGCCA | ACGCGTTCCT | GGGCGTGTGC |
| 2161 | CACCTATGAG | CTCACAAACT | GGGTGCTATG | CACCACGTGC | CGCACGGTAT | CGCGTGTGCT |
| 2221 | GTCCTGATCG | AAGAAGTAAT | TAAGTACAAC | GCTACTGATT | GCCCCACTAA | ACAGACCGCC |
| 2281 | TTCCACAGT  | ACAAATCTCC | TAACGCTAAA | CGTAAGTACG | CTGAGATCGC | CGAATACCTG |
| 2341 | AACCTGAAGG | GTACGAGCGA | CACTGAGAAA | GTTACTGCGC | TGATCGAAGC | TATCTCTAAA |
| 2401 | CTGAAAATTG | ACCTGTCCAT | CCCGCAGAAC | ATCAGCGCCG | CAGGCATCAA | CAAAAAGGAC |
| 2461 | TTTTACAACA | CGCTGGACAA | AATGAGCGAA | CTGGCTTTTG | ACGACCAGTG | CACCACTGCA |
| 2521 | AACCCGCGTT | ACCCGCTGAT | CTCTGAGCTG | AAAGACATTT | ATATCAAATC | TTTTTAA    |

**AdhE2.11 (76940)**

|      |             |            |            |            |            |             |
|------|-------------|------------|------------|------------|------------|-------------|
| 1    | ATGAAAAGTGA | CGAACCAAAA | AGAAGTAAAA | CAAAAAGTGA | ATGAACTGCG | TGAGGCCCGAG |
| 61   | AAAAAGTTCG  | CTACGTATAC | CCAGGACCAA | GTTGACAAGA | TCTTCAAACA | GTGTGCCATT  |
| 121  | GCGGCTGCCA  | AAGAGCGTAT | TAACCTGGCC | AAACTGGCGG | TGGAAGAAAC | CGGCATCGGT  |
| 181  | CTGGTCGAGG  | ACAAGATTAT | CAAGAATCAC | TTTGCCGCGG | AGTATATCTA | CAACAAATAC  |
| 241  | AAAAACGAAA  | AGACTTGCAG | CATCATTGAT | CATGATGACA | GCTTGGGTAT | CACGAAAGTC  |
| 301  | GCAGAACCAA  | TCGGTATTGT | CGCGGCAATT | GTCCCGACCA | CTAATCCGAC | CAGCACCGCG  |
| 361  | ATCTTCAAGA  | GCTTGATCAG | CCTGAAAAC  | CGCAACGCGA | TTTTCTTCAG | CCCGCACCCG  |
| 421  | CGTGCGAAGA  | AGAGCACCAT | CGCAGCGGCG | ACCCTGATTT | TGGATGCCCG | GGTTAAGGCC  |
| 481  | GGTGACCGA   | AAAACATTAT | TGGCTGGATT | GACGAGCCGA | GCATTGAGCT | GTCTCAGGAC  |
| 541  | CTGATGAGCG  | AAGCGGACAT | TATTCTGGCC | ACCGGTGGTC | CGTCTATGGT | TAAGGCAGCG  |
| 601  | TACTCCAGCG  | GTAAGCCTGC | TATCGGCGTT | GGTGGGGGCA | ATACGCCGGC | TATCATCGAT  |
| 661  | GAAAGCGCGG  | ATATTGATAT | GGCAGTTAGC | TCCATCATTC | TGTCCAAAAC | CTACGACAAT  |
| 721  | GGTGTATCT   | GTGCAAGCGA | GCAAAGCATC | CTGGTGATGA | ATAGCATTTA | CGAGAAGGTC  |
| 781  | AAAGAAGAGT  | TTGTTAAGCG | TGGTTCCTAT | ATTCTGAACC | AGCAGGAGAT | TGCAAAAATC  |
| 841  | AAAGAACAAG  | TGTTTAAGAA | TGGCGCGATT | AATGCAGATA | TTGTTGGTAA | GTCCGATAC   |
| 901  | ATTATCGCGA  | AGATGGCGGG | TATCGAAGTG | CCGCAAACCA | CCAAAATCTT | GATCGGCGAA  |
| 961  | GTGCAGAGCG  | TGGAGAAGAG | CGAACTGTTC | AGCCATGAGA | AACTGAGCCC | GGTCTGGGCT  |
| 1021 | ATGTACAAAG  | TGAAGGACTT | TGACGAAGCC | CTGAAGAAAG | CTCAGCGTCT | GATTGAGCTG  |
| 1081 | GGCGCAGCG   | GTCACACGAG | CAGCCTGTAT | ATCGATAGCC | AAAACAATAA | GGACAAGGTG  |
| 1141 | AAAGAGTTCG  | GTCTGGCGAT | GAAAACCTCT | CGCACGTTTA | TCAACATGCC | GAGCAGCCAA  |
| 1201 | GGTGCAGGCG  | GCGATCTGTA | TAACCTCGCA | ATCGCGCCTT | CTTTTACGCT | GGGTTGCGGT  |
| 1261 | ACCTGGGGCG  | GTAATTCGGT | GAGCCAGAAT | GTCGAGCCGA | AGCACCTGCT | GAACATCAAA  |
| 1321 | TCGGTCCGGG  | AGCGCCGTGA | GAAGAGACCG | TGGTTCAAAG | TCCCACAGAA | AATTTACTTC  |
| 1381 | AAATAACGGT  | GCCTGCGTTT | CGCGCTGAAA | GAAGTCAAAG | ACATGAACAA | AAAGCGTGCG  |
| 1441 | TTCATTGTTA  | CCGACAAAGA | CCTGTTCAAA | CTGGGTTACG | TGAACAAAAT | CACCAAAGTT  |
| 1501 | CTGGATGAAA  | TTGACATCAA | GTACTCCATC | TTCATGATA  | TCAAATCCGA | CCCAACGATT  |
| 1561 | GATAGCGTGA  | AAAAGGGCGC | TAAAGAAATG | CTGAACCTTG | AACCGGACAC | CATCATCAGC  |
| 1621 | ATCGGTGGTG  | GCTCTCCTAT | GGATGCTGCG | AAGGTCATGC | ACCTGCTGTA | CGAATACCCG  |
| 1681 | GAAGCGGAAA  | TCGAAAACCT | GGCTATCAAC | TTCATGGACA | TCCGCAAACG | TATCTGCAAC  |
| 1741 | TTCCCGAAGC  | TGGGCACTAA | AGCTATTTCC | GTTGCCATCC | CGACTACCCG | GGGCACTGGT  |
| 1801 | TCCGAAGCCA  | CGCCGTTCCG | CGTGATCACC | AACGATGAAA | CCGGTATGAA | ATACCCGCTG  |
| 1861 | ACCTCTTACG  | AACTGACCCC | GAACATGGCA | ATTATCGACA | CCGAGCTGAT | GCTGAACATG  |
| 1921 | CCGCGCAAGC  | TGACCGCTGC | TACCGGCATC | GACGCTCTGG | TACATGCTAT | TGAGGCGTAC  |
| 1981 | GTTTCCGTGA  | TGGTACCGA  | TTACACCGAC | GAAGTGGCCC | TGCGTGCGAT | CAAAATGATT  |
| 2041 | TTCAAGTACC  | TGCCTCGCGC | TTACAAAAAC | GGCACGAATG | ACATCGAGGC | GCGTGAGAAA  |

|      |            |            |            |            |            |            |
|------|------------|------------|------------|------------|------------|------------|
| 2101 | ATGGCCCATG | CAAGCAACAT | CGCGGGCATG | GCCTTCGCCA | ACGCGTTCCT | GGGCGTGTGC |
| 2161 | CACTCTATGG | CTCACAAACT | GGTGCTATG  | CACCACGTGC | CGCACGGTAT | CGCGTGTGCT |
| 2221 | GTCTTGATCG | AAGAAGTAAT | TAAGTACAAC | GCTACTGATT | GCCCCACTAA | ACAGACCCGC |
| 2281 | TTCCACAGT  | ACAAATCTCC | TAACGCTAAA | CGTAAGTACG | CTGAGATCGC | CGAATACCTG |
| 2341 | AACCTGAAGG | GTACGAGCGA | CACTGAGAAA | GTTACTGCGC | TGATCGAAGC | TATCTCTAAA |
| 2401 | CTGAAAATTG | ACCTGTCCAT | CCCGCAGAAC | ATCAGCGCCG | CAGGCATCAA | CAAAAAGGAC |
| 2461 | TTTTACAACA | CGCTGGACAA | AATGAGCGAA | CTGGCTTTTG | ACGACCAGTG | CACCACTGCA |
| 2521 | AACCCGCGTT | ACCCGCTGAT | CTCTGAGCTG | AAAGACATTT | ATATCAAATC | TTTTTAA    |

**AdhE2.12 (76941)**

|      |            |            |             |            |            |            |
|------|------------|------------|-------------|------------|------------|------------|
| 1    | ATGAAAGTGA | CGAACCAAAA | AGAAGTAAA   | CAAAAAGTGA | ATGAACTGCG | TGAGGCCAG  |
| 61   | AAAAAGTTCG | CTAGCTATAC | CCAGGAGCAA  | GTTGACAAGA | TCTTCAAACA | GTGTGCCATT |
| 121  | GCGGCTGCCA | AAGAGCGTAT | TAAGTGGCC   | AACTGGCGG  | TGGAAGAAAC | CGGCATCGGT |
| 181  | CTGGTCGAGG | ACAAGATTAT | CAAGAATCAC  | TTTGCCGCGG | AGTATATCTA | CAACAAATAC |
| 241  | AAAAACGAAA | AGACTTGCGG | CATCATTGAT  | CATGATGACA | GCTTGGGTAT | CACGAAAGTC |
| 301  | GCAGAACCAA | TCGGTATTGT | CGCGAGCATT  | GTCCCGACCA | CTAATCCGAC | CAGCACCGCG |
| 361  | ATCTTCAAGA | GCTTGATCAG | CCTGAAAACC  | CGCAACGCGA | TTTTCTTCAG | CCCGCACCCG |
| 421  | CGTGCGAAGA | AGAGCACCAT | CGCAGCGGCG  | AAGCTGATTT | TGGATGCCGC | GGTAAAGGCC |
| 481  | GGTGACCCGA | AAAACATTAT | TGGCTGGATT  | GACGAGCCGA | GCATTGAGCT | GTCTCAGGAC |
| 541  | CTGATGAGCG | AAGCGGACAT | TATCTGGCC   | ACCGGTGGTC | CGTCTATGGT | TAAGGCAGCG |
| 601  | TACTCCAGCG | GTAAGCCTGC | TATCGCGGTT  | GGTGCGGGCA | ATACGCCCGG | TATCATCGAT |
| 661  | GAAAGCGCGG | ATATTGATAT | GGCAGTTAGC  | TCCATCATTC | TGGGTAAAAC | CTACGACAAT |
| 721  | GGTGTATCT  | GTGCAAGCGA | GCAAAGCATC  | CTGGTGATGA | ATAGCATTTA | CGAGAAGGTC |
| 781  | AAAGAAGAGT | TTGTTAAGCG | TGGTTCCTAT  | ATTCTGAACC | AGAACGAGAT | TGCAAAAATC |
| 841  | AAAGAAACGA | TGTTAAGAA  | TGGCGCGATT  | AATGCAGATA | TGTTGGTAA  | GTCCGCATAC |
| 901  | ATTATCGCGA | AGATGGCGGG | TATCGAAGTG  | CCGCAAACCA | CCAAAATCTT | GATCGGCGAA |
| 961  | GTGCAGAGCG | TGGAGAAGAG | CGAACTGTTT  | AGCCATGAGA | AACTGAGCCC | GGTCTGGCT  |
| 1021 | ATGTACAAAG | TGAAGGACTT | TGACGAAGCC  | CTGAAGAAAG | CTCAGCGTCT | GATTGAGCTG |
| 1081 | GCGGCAGCG  | GTACACGAG  | CAGCCTGTAT  | ATCGATAGCC | AAAACAATAA | GGACAAGGTG |
| 1141 | AAAGAGTTCG | GTCTGGCGAT | GAAAACCTCT  | CGCACGTTTA | TCAACATGCC | GAGCAGCCAA |
| 1201 | GGTGCAGCG  | GCGATCTGTA | TAAGTTCGCA  | ATCGCGCCTT | CTTTTACGCT | GGGTTGCGGT |
| 1261 | ACCTGGGGCG | GTAATTCGGT | GAGCCAGAAT  | GTGAGCCGA  | AGCACCTGCT | GAACATCAAA |
| 1321 | TCGGTCGCGG | AGCGCCGTGA | GAAGAGACCG  | TGGTTCAAAG | TCCCACAGAA | AATTTACTTC |
| 1381 | AAATACGGCT | GCCTGCGTTT | CGCGTGA AAA | GAAGTAAAG  | ACATGAACAA | AAAGCGTGC  |
| 1441 | TTCATTGTTA | CCGACAAAGA | CCTGTTCAAA  | CTGGGTTACG | TGAACAAAAT | CACCAAAGTT |
| 1501 | CTGGATGAAA | TTGACATCAA | GTAATCCATC  | TTCATGATA  | TCAAATCCGA | CCCAACGATT |
| 1561 | GATAGCGTGA | AAAAGGGCG  | TAAAGAAATG  | CTGAACTTTG | AACCGGACAC | CATCATCAGC |
| 1621 | ATCGGTGGTG | GCTCTCCTAT | GGATGCTGCG  | AAGGTCATGC | ACCTGCTGTA | CGAATACCCG |
| 1681 | GAAGCGGAAA | TCGAAAACCT | GGTATCAAC   | TTCATGGACA | TCCGCAAACG | TATCTGCAAC |
| 1741 | TCCCAGAGC  | TGGGCACTAA | AGCTATTTCC  | GTTGCCATCC | CGACTACCGC | GGGCATCGGT |
| 1801 | TTCCGAGCCA | CGCGTTCGC  | CGTATCACC   | AACGATGAAA | CCGGTATGAA | ATACCCGCTG |
| 1861 | ACCTTTACG  | AACTGACCCC | GAACATGGCA  | ATTATCGACA | CCGAGCTGAT | GCTGAACATG |
| 1921 | CCGCGCAAGC | TGACCGCTGC | TACCGGCATC  | GACGCTCTGG | TACATGCTAT | TGAGGCGTAC |
| 1981 | GTTTCCGTGA | TGGTACCGA  | TTACACCGAC  | GAAGTGGCCC | TGCGTGCAT  | CAAAATGATT |
| 2041 | TTCAAGTACC | TGCCTCGCGC | TTACAAAAAC  | GGCACGAATG | ACATCGAGGC | GCGTGAGAAA |
| 2101 | ATGGCCCATG | CAAGCAACAT | CGCGGGCATG  | GCCTTCGCCA | ACGCGTTCCT | GGGCGTGTGC |
| 2161 | CACTCTATGG | CTCACAAACT | GGTGCTATG   | CACCACGTGC | CGCACGGTAT | CGCGTGTGCT |
| 2221 | GTCCTGATCG | AAGAAGTAAT | TAAGTACAAC  | GCTACTGATT | GCCCCACTAA | ACAGACCCGC |
| 2281 | TTCCACAGT  | ACAAATCTCC | TAACGCTAAA  | CGTAAGTACG | CTGAGATCGC | CGAATACCTG |
| 2341 | AACCTGAAGG | GTACGAGCGA | CACTGAGAAA  | GTTACTGCGC | TGATCGAAGC | TATCTCTAAA |
| 2401 | CTGAAAATTG | ACCTGTCCAT | CCCGCAGAAC  | ATCAGCGCCG | CAGGCATCAA | CAAAAAGGAC |
| 2461 | TTTTACAACA | CGCTGGACAA | AATGAGCGAA  | CTGGCTTTTG | ACGACCAGTG | CACCACTGCA |
| 2521 | AACCCGCGTT | ACCCGCTGAT | CTCTGAGCTG  | AAAGACATTT | ATATCAAATC | TTTTTAA    |

**AdhE2.13 (76942)**

|     |            |            |            |            |            |            |
|-----|------------|------------|------------|------------|------------|------------|
| 1   | ATGAAAGTGA | CGAACCAAAA | AGAAGTAAA  | CAAAAAGTGA | ATGAACTGCG | TGAGGCCAG  |
| 61  | AAAAAGTTCG | CTAGCTATAC | CCAGGAGCAA | GTTGACAAGA | TCTTCAAACA | GTGTGCCATT |
| 121 | GCGGCTGCCA | AAGAGCGTAT | TAAGTGGCC  | AACTGGCGG  | TGGAAGAAAC | CGGCATCGGT |
| 181 | CTGGTCGAGG | ACAAGATTAT | CAAGAATCAC | TTTGCCGCGG | AGTATATCTA | CAACAAATAC |
| 241 | AAAAACGAAA | AGACTTGCGG | CATCATTGAT | CATGATGACA | GCTTGGGTAT | CACGAAAGTC |

301 GCAGAACCAA TCGGTATTGT CGCGCAATT GTCCCGACCA CTAATCCGAC CAGCACC GCG  
361 ATCTTCAAGA GCTTGATCAG CCTGAAAACC CGCAACGCGA TTTTCTTCAG CCCGCACCCG  
421 CGTGCGAAGA AGAGCACCAT CGCAGCGGCG AAGCTGATTT TGGATGCCGC GGTAAAGGCC  
481 GGTGCACCGA AAAACATTAT TGGCTGGATT GACGAGCCGA GCATTGAGCT GTCTCAGGAC  
541 CTGATGAGCG AAGCGGACAT TATTCTGGCC ACCGGTGGTC CGTCTATGGT TAAGGCAGCG  
601 TACTCCAGCG GTAAGCCTGC TATCGGCGTT GGTGCGGGCA ATACGCCGGC TATCATCGAT  
661 GAAAGCGCGG ATATTGATAT GGCAGTTAGC TCCATCATTG TGTCCAAAAC CTACGACAAT  
721 GGTGTTATCT GTGCAAGCGA GCAAAGCATC CTGGTGATGA ATAGCATTTA CGAGAAGGTC  
781 AAAGAAGAGT TTGTTAAGCG TGGTTCCTAT ATTCTGAACC AGAACGAGAT TGCAAAAATC  
841 AAAGAAACGA TGTTAAGAA TGGCGCGATT AATCGTGATA TTGTTGGTAA GTCCGCATAC  
901 ATTATCGCGA AGATGGCGGG TATCGAAGTT CCGCAAACCA CAAAATCTT GATTCGGCAA  
961 GTGCAGAGCG TGGAGAAGAG CGAACTGTTC AGCAAAGAGA AACTGAGCCC GGTCTGGCT  
1021 ATGTACAAAG TGAAGGACTT TGACGAAGCC CTGAAGAAAG CTCAGCGTCT GATTGAGCTG  
1081 GCGGCGAGCG GTCACACGAG CAGCCTGTAT ATCGATAGCC AAAACAATAA GGACAAGGTG  
1141 AAAGAGTTCG GTCTGGCGAT GAAAACCTCT CGCACGTTTA TCAACATGCC GAGCAGCCAA  
1201 GGTGCGAGCG GCGATCTGTA TAACTTCGCA ATCGCGCCTT CTTTTACGCT GGGTTGCGGT  
1261 ACCTGGGGCG GTAATTTCGGT GAGCCAGAAT GTCGAGCCGA AGCACCTGCT GAACATCAA  
1321 TCCGTCGCGG AGCGCCGTGA GAAGAGACCG TGGTTCAAAG TCCCACAGAA AATTACTTTC  
1381 AAATACGGCT GCCTGCGTTT CGCGCTGAAA GAACTGAAAG ACATGAACAA AAAGCGTGCG  
1441 TTCATTGTTA CCGACAAAGA CCTGTTCAAA CTGGGTTACG TGAACAAAAT CACCAAAGTT  
1501 CTGGATGAAA TTGACATCAA GTACTCCATC TTCACTGATA TCAAATCCGA CCCAACGATT  
1561 GATAGCGTGA AAAAGGGCGC TAAAGAAATG CTGAACTTTG AACC GGACAC CATCATCAGC  
1621 ATCGGTGGTG GCTCTCCTAT GGATGCTGCG AAGGTCATGC ACCTGCTGTA CGAATACCCG  
1681 GAACGGGAAA TCGAAAACCT GGCTATCAAC TTCATGGACA TCCGCAAACG TATCTGCAAC  
1741 TTCCCGAAGC TGGGCACTAA AGCTATTTCC GTTGCCATCC CGACTACCCG GGGCACTGGT  
1801 TCCGAAGCCA CGCCGTTCGC CGTGATCACC AACGATGAAA CCGGTATGAA ATACCCGCTG  
1861 ACCTCTTACG AACTGACCCC GAACATGGCA ATTATCGACA CCGAGCTGAT GCTGAACATG  
1921 CCGCGCAAGC TGACCGCTGC TACCGGCATC GACGCTCTGG TACATGCTAT TGAGGCGTAC  
1981 GTTTCCGTGA TGGTACCGA TTACACCGAC GAACTGGCCC TCGGTGCGAT CAAAATGATT  
2041 TTCAAGTACG TGCCTCGCGC TTACAAAAAC GGCACGAATG ACATCGAGGC GCGTGAGAAA  
2101 ATGGCCCATG CAAGCAACAT CGCGGCGATG GCCTTCGCCA ACGCGTTCCT GGGCTGTGTC  
2161 CACTCTATGG CTCACAAACT GGGTGTATAG CACCACGTGC CGCAGCGTAT CGCGTGTGCT  
2221 GTCTGATCG AAGAAGTAAT TAAGTACAAC GCTACTGATT GCCCGACTAA ACAGACCGCC  
2281 TTCCACAGT ACAAATCTCC TAACGCTAAA CGTAAGTACG CTGAGATCGC CGAATACCTG  
2341 AACCTGAAGG GTACGAGCGA CACTGAGAAA GTTACTGCGC TGATCGAAGC TATCTCTAAA  
2401 CTGAAAATTG ACCTGTCCAT CCCGAGAAC ATCAGCGCCG CAGGCATCAA CAAAAGGAC  
2461 TTTTACAACA CGCTGGACAA AATGAGCGAA CTGGCTTTTG ACGACCAGTG CACCCTGCA  
2521 AACCCGCGTT ACCCGCTGAT CTCTGAGCTG AAAGACATTT ATATCAAATC TTTTTAA

**AdhE2.14 (76943)**

1 ATGAAAGTGA CGAACCAAAA AGAACTGAAA CAAAAGACA ATGAACTGCG TGAGGCCCAG  
61 AAAAAGTTCG CTACGTATAC CCAGGAGCAA GTTGACAAGA TCTTCAAACA GTGTGCCATT  
121 GCGGTGCCA AAGAGCGTAT TAACTTGGCC AACTGGCGG TGAAGAAAC CGGCATCGGT  
181 CTGGTCGAGG ACAAGATTAT CAAGAATCAC TTTGCCGCGG AGTATATCTA CAACAAATAC  
241 AAAAACGAAA AACTTTCGCG CATCATTGAT CATGATGACA GCTTGGGTAT CAGCAAAGTC  
301 GCAGAACCAA TCGGTATTGT CGCGCAATT GTCCCGACCA CTAATCCGAC CAGCACC GCG  
361 ATCTTCAAGA GCTTGATCAG CCTGAAAACC CGCAACGCGA TTTTCTTCAG CCCGCACCCG  
421 CGTGCGAAGA AGAGCACCAT CGCAGCGGCG AAGCTGATTT TGGATGCCGC GGTAAAGGCC  
481 GGTGCACCGA AAAACATTAT TGGCTGGATT GACGAGCCGA GCATTGAGCT GTCTCAGGAC  
541 CTGATGAGCG AAGCGGACAT TATTCTGGCC ACCGGTGGTC CGTCTATGGT TAAGGCAGCG  
601 TACTCCAGCG GTAAGCCTGC TATCGGCGTT GGTGCGGGCA ATACGCCGGC TATCATCGAT  
661 GAAAGCGCGG ATATTGATAT GGCAGTTAGC TCCATCATTG TGTCCAAAAC CTACGACAAT  
721 GGTGTTATCT GTGCAAGCGA GCAAAGCATC CTGGTGATGA ATAGCATTTA CGAGAAGGTC  
781 AAAGAAGAGT TTGTTAAGCG TGGTTCCTAT ATTCTGAACC AGAACGAGAT TGCAAAAATC  
841 AAAGAAACGA TGTTAAGAA TGGCGCGATT AATGCAGATA TTGTTGGTAA GTCCGCATAC  
901 ATTATCGCGA AGATGGCGGG TATCGAAGTG CCGCAAACCA CAAAATCTT GATCGGCGAA  
961 GTGCAGAGCG TGGAGAAGAG CGAACTGTTC AGCCATGAGA AACTGAGCCC GGTCTGGCT  
1021 ATGTACAAAG TGAAGGACTT TGACGAAGCC CTGAAGAAAG CTCAGCGTCT GATTGAGCTG  
1081 GCGGCGAGCG GTCACACGAG CAGCCTGTAT AGCGATAGCC AAAACAATAA GGACAAGGTG  
1141 AAAGAGTTCG GTCTGGAGAT GAAAACCTCT CGCACGTTTA TCAACATGCC GAGCAGCCAA  
1201 GGTGCGAGCG GCGATCTGTA TAACTTCGCA ATCGCGCCTT CTTTTACGCT GGGTTGCGGT  
1261 ACCTGGGGCG GTAATTTCGGT GAGCCAGAAT GTCGAGCCGA AGCACCTGCT GAACATCAA

|      |            |            |            |            |            |            |
|------|------------|------------|------------|------------|------------|------------|
| 1321 | TCGGTCGCGG | AGCGCCGTGA | GAAGAGACCG | TGGTTCAAAG | TCCCACAGAA | AATTTACTTC |
| 1381 | AAATACGGCT | GCCTGCGTTT | CGCGCTGAAA | GAAGTCAAAG | ACATGAACAA | AAAGCGTGCG |
| 1441 | TTCATTGTTA | CCGACAAAGA | CCTGTTCAAA | CTGGGTTACG | TGAACAAAAT | CACCAAAGTT |
| 1501 | CTGGATGAAA | TTGACATCAA | GTAATCCATC | TTCATGATA  | TCAAATCCGA | CCCAACGATT |
| 1561 | GATAGCGTGA | AAAAGGGCGC | TAAAGAAATG | CTGAACTTTG | AACCGGACAC | CATCATCAGC |
| 1621 | ATCGGTGGTG | GCTCTCCTAT | GGATGCTGCG | AAGGTCATGC | ACCTGCTGTA | CGAATACCCG |
| 1681 | GAAGCGGAAA | TCGAAAACCT | GGCTATCAAC | TTCATGGACA | TCCGCAAACG | TATCTGCAAC |
| 1741 | TTCCCGAAGC | TGGGCACTAA | AGCTATTTCC | GTTGCCATCC | CGACTACCGC | GGGCACTGGT |
| 1801 | TCCGAAGCCA | CGCCGTTTCG | CGTGATCACC | AACGATGAAA | CCGGTATGAA | ATACCCGCTG |
| 1861 | ACCTCTTACG | AACTGACCCC | GAACATGGCA | ATTATCGACA | CCGAGCTGAT | GCTGAACATG |
| 1921 | CCGCGCAAGC | TACCGCTGCG | TACCGGCATC | GACGCTCTGG | TACATGCTAT | TGAGGCGTAC |
| 1981 | GTTTCCGTGA | TGGCTACCGA | TTACACCGAC | GAAGTGGCCC | TGCGTGCGAT | CAAAATGATT |
| 2041 | TTCAAGTACC | TGCCCTCGCG | TTACAAAAAC | GGCACGAATG | ACATCGAGGC | GCGTGAGAAA |
| 2101 | ATGGCCCATG | CAAGCAACAT | CGCGGGCATG | GCCTTCGCCA | ACGCGTTTCT | GGGCGTGTGC |
| 2161 | CACTCTATGG | CTCACAAACT | GGTGCTATG  | CACCACGTGC | CGCACGGTAT | CGCGTGTGCT |
| 2221 | GTCCTGATCG | AAGAAGTAAT | TAAGTACAAC | GCTACTGATT | GCCCCACTAA | ACAGACCCGC |
| 2281 | TTCCACAGT  | ACAAATCTCC | TAACGCTAAA | CGTAAGTACG | CTGAGATCGC | CGAATACCTG |
| 2341 | AACCTGAAGG | GTACGAGCGA | CACTGAGAAA | GTTACTGCGC | TGATCGAAGC | TATCTCTAAA |
| 2401 | CTGAAAATTG | ACCTGTCCAT | CCCGCAGAAC | ATCAGCGCCG | CAGGCATCAA | CAAAAAGGAC |
| 2461 | TTTTACAACA | CGCTGGACAA | AATGAGCGAA | CTGGCTTTTG | ACGACCAGTG | CACCACTGCA |
| 2521 | AACCCGCGTT | ACCCGCTGAT | CTCTGAGCTG | AAAGACATTT | ATATCAAATC | TTTTTAA    |

**AdhE2.15 (76944)**

|      |            |            |            |            |            |            |
|------|------------|------------|------------|------------|------------|------------|
| 1    | ATGAAAGTGA | CGAACCAAAA | AGAAGTAAA  | CAAAAAGTGA | ATGAAAGTGC | TGAGGCCAG  |
| 61   | AAAAAGTTCG | CTACGTATAC | CCAGGAGCAA | GTTGACAAGT | TCTTCAAACA | GTGTGCCATT |
| 121  | GCGGTGCGCA | AATACCGTAT | TAAGTGGGCC | AAAGTGGCGG | TGGAAGAAAC | CGGCATCGGT |
| 181  | CTGGTCGAGG | ACAAGATTAT | CAAGAATCAC | TTTGCCGCGG | AGTATATCTA | CAACAAAGAG |
| 241  | AAAAACGAAA | AGACTTGCGG | CATCATTGAT | CATGATGACA | GCTTGGGTAT | CAGCAAAGTC |
| 301  | GCAGAACAAA | TCGGTATTGT | CGCGGCATAT | GTCCCGACCA | CTAATCCGAC | CAGCACCGCG |
| 361  | ATCTTCAAGA | GCTTGATCAG | CCTGAAAACC | CGCAACGCGA | TTTTCTTCAG | CCCGCACCCG |
| 421  | CGTGCGAAGA | AGAGCACCAT | CGCAGCGGCG | AAGCTGATTT | TGGATGCCCG | GGTTAAGGCC |
| 481  | GGTGCACCGA | AAAACATTAT | TGGCTGGATT | GACGAGCCGA | GCATTGAGCT | GTCTCAGGAC |
| 541  | CTGATGAGCG | AAGCGGACAT | TATCTGGGCC | ACCGGTGGTC | CGTCTATGGT | TAAGGCAGCG |
| 601  | TACTCCAGCG | GTAAGCCTGC | TATCGGCGTT | GGTGCGGGCA | ATACGCCGGC | TATCATCGAT |
| 661  | GAAAGCGCGG | ATATTGATAT | GGCAGTTAGC | TCCATCATT  | TGTCCAAAAC | CTACGACAAT |
| 721  | GGTGTATCT  | GTGCAAGCGA | GCAAAGCATC | CTGGTGATGA | ATAGCATTTA | CGAGAAGGTC |
| 781  | AAAGAAGAGT | TTGTTAAGCG | TGGTTCTTAT | ATTCTGAACC | AGAACGAGAT | TGCAAAAATC |
| 841  | AAAGAAACGA | TGTTTAAGAA | TGGCGCGATT | AATGCAGATA | TTGTTGGTAA | GTCCGCATAC |
| 901  | ATTATCGCGA | AGATGGCGGG | TATCGAAGTG | CCGCAAACCA | CCAAAATCTT | GATCGGCGAA |
| 961  | GTGCAGAGCG | TGGAGAAGAG | CGAACTGTTC | AGCCATGAGA | AACTGAGCCC | GGTTCTGGCT |
| 1021 | ATGTACAAAG | TGAAGGACTT | TGACGAAGCC | CTGAAGAAAG | CTCAGCGTCT | GATTGAGCTG |
| 1081 | GGCGGCAGCG | GTACACGAG  | CAGCCTGTAT | ATCGATAGCC | AAAACAATAA | GGACAAGGTG |
| 1141 | AAAGAGTTCG | GTCTGGCGAT | GAAAAGCTCT | CGCACGTTTA | TCAACATGCC | GAGCAGCCAA |
| 1201 | GGTGCAGAGC | GCGATCTGTA | TAAGTTCGCA | ATCGCGCCTT | CTTTTACGCT | GGGTTGCGGT |
| 1261 | ACCTGGGGCG | GTAATTCGGT | GAGCCAGAAT | GTCGAGCCGA | AGCACCTGCT | GAACATCAAA |
| 1321 | TCGGTCGCGG | AGCGCCGTGA | GAAGAGACCG | TGGTTCAAAG | TCCCACAGAA | AATTTACTTC |
| 1381 | AAATACGGCT | GCCTGCGTTT | CGCGCTGAAA | GAAGTCAAAG | ACATGAACAA | AAAGCGTGCG |
| 1441 | TTCATTGTTA | CCGACAAAGA | CCTGTTCAAA | CTGGGTTACG | TGAACAAAAT | CACCAAAGTT |
| 1501 | CTGGATGAAA | TTGACATCAA | GTAATCCATC | TTCATGATA  | TCAAATCCGA | CCCAACGATT |
| 1561 | GATAGCGTGA | AAAAGGGCGC | TAAAGAAATG | CTGAACTTTG | AACCGGACAC | CATCATCAGC |
| 1621 | ATCGGTGGTG | GCTCTCCTAT | GGATGCTGCG | AAGGTCATGC | ACCTGCTGTA | CGAATACCCG |
| 1681 | GAAGCGGAAA | TCGAAAACCT | GGCTATCAAC | TTCATGGACA | TCCGCAAACG | TATCTGCAAC |
| 1741 | TTCCCGAAGC | TGGGCACTAA | AGCTATTTCC | GTTGCCATCC | CGACTACCGC | GGGCACTGGT |
| 1801 | TCCGAAGCCA | CGCCGTTTCG | CGTGATCACC | AACGATGAAA | CCGGTATGAA | ATACCCGCTG |
| 1861 | ACCTCTTACG | AACTGACCCC | GAACATGGCA | ATTATCGACA | CCGAGCTGAT | GCTGAACATG |
| 1921 | CCGCGCAAGC | TACCGCTGCG | TACCGGCATC | GACGCTCTGG | TACATGCTAT | TGAGGCGTAC |
| 1981 | GTTTCCGTGA | TGGCTACCGA | TTACACCGAC | GAAGTGGCCC | TGCGTGCGAT | CAAAATGATT |
| 2041 | TTCAAGTACC | TGCCCTCGCG | TTACAAAAAC | GGCACGAATG | ACATCGAGGC | GCGTGAGAAA |
| 2101 | ATGGCCCATG | CAAGCAACAT | CGCGGGCATG | GCCTTCGCCA | ACGCGTTTCT | GGGCGTGTGC |
| 2161 | CACTCTATGG | CTCACAAACT | GGTGCTATG  | CACCACGTGC | CGCACGGTAT | CGCGTGTGCT |
| 2221 | GTCCTGATCG | AAGAAGTAAT | TAAGTACAAC | GCTACTGATT | GCCCCACTAA | ACAGACCCGC |
| 2281 | TTCCACAGT  | ACAAATCTCC | TAACGCTAAA | CGTAAGTACG | CTGAGATCGC | CGAATACCTG |

|      |            |            |            |            |            |            |
|------|------------|------------|------------|------------|------------|------------|
| 2341 | AACCTGAAGG | GTACGAGCGA | CACTGAGAAA | GTTACTGCGC | TGATCGAAGC | TATCTCTAAA |
| 2401 | CTGAAAATTG | ACCTGTCCAT | CCCGCAGAAC | ATCAGCGCCG | CAGGCATCAA | CAAAAAGGAC |
| 2461 | TTTTACAACA | CGCTGGACAA | AATGAGCGAA | CTGGCTTTTG | ACGACCAGTG | CACCACTGCA |
| 2521 | AACCCGCGTT | ACCCGCTGAT | CTCTGAGCTG | AAAGACATTT | ATATCAAATC | TTTTTAA    |

**AdhE2.16 (76945)**

|      |             |            |            |            |             |             |
|------|-------------|------------|------------|------------|-------------|-------------|
| 1    | ATGAAAAGTGA | CGAACCAAAA | AGAACTGAAA | CAAAAAGTGA | ATGAACTGCG  | TGAGGCCCGAG |
| 61   | AAAAAGTTTC  | CTACGTATAC | CCAGGAGCAA | GTTGAGAAGA | TCTTCAAACA  | GTGTGCCATT  |
| 121  | GCGGCTGCCA  | AAGAGCGTAT | TAACCTGGCC | AAACTGGCGG | TGGAAGAAAC  | CGGCATCGGT  |
| 181  | CTGGTCGAGG  | ACAAGATTAT | CAAGAATCAC | TTTGCCGCGG | AGTATATCTA  | CAACAAATAC  |
| 241  | AAAAACGAAA  | AGACTTGCGG | CATCATTGAT | CATGATGACA | GCTTGGGTAT  | CACGAAAGTC  |
| 301  | GCAGAACCAA  | TCGGTATTGT | CGCGGCAATT | GTCCCGACCA | CTAATCCGAC  | CAGCACC CGG |
| 361  | ATCTTCAAGA  | GCTTGATCAG | CCTGAAAACC | CGCAACGCGA | TTTTCTTCAG  | CCCGCACCCG  |
| 421  | CGTGCGAAGA  | AGAGCACCAT | CGCAGCGGCT | AAGCTGATTT | TGGATGCCGC  | GGTTAAGGCC  |
| 481  | GGTGACCCGA  | AAAACATTAT | TGGCTGGATT | GACGAGCCGA | GCATTGAGCT  | GTCTCAGGAC  |
| 541  | CTGATGAGCG  | AACCGGACAT | TATTCTGGCC | ACCGGTGGTC | CGTCTATGGT  | TAAGGCAGCG  |
| 601  | TACTCCAGCG  | GTAAGCCTGC | TATCGGCGTT | GGTGCGGGCA | ATACGCCGGC  | TATCATCGAT  |
| 661  | GAAAGCGCGG  | ATATTGATAT | GGCAGTTAGC | TCCATCATTC | TGTCCAAAAC  | CTACGACAAT  |
| 721  | GGTGTATCT   | GTGCAAGCGA | GCAAAGCATC | CTGGTGATGA | ATAGCATTTA  | CGAGAAGGTC  |
| 781  | AAAGAAGAGT  | TTGTTAAGCG | TGGTTCCTAT | ATTCTGAACC | AGAACGAGAT  | TGCAAAAATC  |
| 841  | AAAGAAACGA  | TGTTTAAGAA | TGGCGCGATT | AATGCAGATA | TTGTTGGTAA  | GTCCGCATAC  |
| 901  | ATTATCGCGA  | AGATGGCGGG | TATCGAAGTG | CGCAAAACCA | CCAAAATCTT  | GATCGGCGAA  |
| 961  | GTGCAGAGCG  | TGGAGAAGAG | CGAACTGTTC | AGCAAAGAGA | AACTGAGCCC  | GGTTCTGGCT  |
| 1021 | ATGTACAAAG  | TGAAGGACTT | TGACGAAGCC | CTGAAGAAAG | CTCAGCGTCT  | GATTGAGCTG  |
| 1081 | GGCGGCAGCG  | GTCACACGAG | CAGCCTGTAT | ATCGATAGCC | AAAACAATAA  | GGACAAGGTG  |
| 1141 | AAAGAGTTTC  | GTCTGGCGAT | GAAAACCTCT | CGCACGTTTA | TCAACATGCC  | GAGCAGCCAA  |
| 1201 | GGTGCAGAGC  | GCGATCTGTA | TAACCTCGCA | ATCGCGCCTT | CTTTTACGCT  | GGGTTGCGGT  |
| 1261 | ACCTGGGGCG  | GTAATTCGGT | GAGCCAGAAT | GTCGAGCCGA | AGCACCTGCT  | GAACATCAA   |
| 1321 | TCGGTCGCGG  | AGCGCCGTGA | GAAGAGACCG | TGGTTCAAAG | TCCCACAGAA  | AATTTACTTC  |
| 1381 | AAATACGGCT  | GCCTGCGTTT | CGCGCTGAAA | GAAGTGAAG  | ACATGAACAA  | AAAGCGTGCG  |
| 1441 | TTCATTGTTA  | CCGACAAAGA | CCTGTTCAAA | CTGGGTTACG | TGAACAAAAT  | CACCAAAGTT  |
| 1501 | CTGGATGAAA  | TTGACATCAA | GTACTCCATC | TCTACTGATA | TCAAATCCGA  | CCCAACGATT  |
| 1561 | GATAGCGTGA  | AAAAGGGCGC | TAAAGAAATG | CTGAACTTTG | AACCGGACAC  | CATCATCAGC  |
| 1621 | ATCGGTGGTG  | GCTCTCCTAT | GGATGCTGAC | AAGGTCATGC | ACCTGCTGTA  | CGAATACCCG  |
| 1681 | GAAGCGGAAA  | TCGAAAACCT | GGTATCAAC  | TTCATGGACA | TCCGAAAACG  | TATCTGCAAC  |
| 1741 | TTCCCGAAGC  | TGGGCACTAA | AGCTATTTCC | GTTGCCATCC | CGACTACCGC  | GGGCACTGGT  |
| 1801 | TCCGAAGCCA  | CGCCGTTCGC | CGTGATCACC | AACGATGAAA | CCGGTATGAA  | ATACCCGCTG  |
| 1861 | ACCTCTTACG  | AACTGACCCC | GAACATGGCA | ATTATCGACA | CCGAGCTGAT  | GCTGAACATG  |
| 1921 | CCGCGCAAGC  | TGACCGCTGC | TACCGGCATC | GACGCTCTGG | TACATGCTAT  | TGAGGCGTAC  |
| 1981 | GTTTCCGTGA  | TGGTACCGA  | TTACACCGAC | GAAGTGGCCC | TGCGTGCGAT  | CAAAAATGATT |
| 2041 | TTCAAGTATC  | TGCTTCGCGC | TTACAAAAC  | GGCAGCAATG | ACATCGAGGC  | GCGTGAGAAA  |
| 2101 | ATGGCCCATG  | CAAGCAACAT | CGCGGGCATG | GCCTTCGCCA | ACGCGTTCCCT | GGGCGTGTGC  |
| 2161 | CACTCTATGG  | CTCACAAACT | GGGTGCTATG | CACCACGTGC | CGCACGGTAT  | CGCGTGTGCT  |
| 2221 | GTCCTGATCG  | AAGAAGTAAT | TAAGTACAAC | GCTACTGATT | GCCCAGACTAA | ACAGACCGCC  |
| 2281 | TTCCACAGT   | ACAAATCTCC | TAACGCTAAA | CGTAAGTACG | CTGAGATCGC  | CGAATACCTG  |
| 2341 | AACCTGAAGG  | GTACGAGCGA | CACTGAGAAA | GTTACTGCGC | TGATCGAAGC  | TATCTCTAAA  |
| 2401 | CTGAAAATTG  | ACCTGTCCAT | CCCGCAGAAC | ATCAGCGCCG | CAGGCATCAA  | CAAAAAGGAC  |
| 2461 | TTTTACAACA  | CGCTGGACAA | AATGAGCGAA | CTGGCTTTTG | ACGACCAGTG  | CACCACTGCA  |
| 2521 | AACCCGCGTT  | ACCCGCTGAT | CTCTGAGCTG | AAAGACATTT | ATATCAAATC  | TTTTTAA     |

**AdhE2.17 (76946)**

|     |             |            |            |            |            |             |
|-----|-------------|------------|------------|------------|------------|-------------|
| 1   | ATGAAAAGTGA | CGAACCAAAA | AGAACTGAAA | CAAAAAGTGA | ATGAACTGCG | TGAGGCCCGAG |
| 61  | AAAAAGTTTC  | CTACGTATAC | CCAGGAGCAA | GTTGACAAGA | TCTTCAAACA | GTGTGCCATT  |
| 121 | GCGGCTGCCA  | AACTGCGTAT | TAACCTGGCC | AAACTGGCGG | TGGAAGAAAC | CGGCATCGGT  |
| 181 | CTGGTCGAGG  | ACAAGATTAT | CAAGAATCAC | TTTGCCGCGG | AGTATATCTA | CAACAAATAC  |
| 241 | AAAAACGAAA  | AGACTTGCGG | CATCATTGAT | CATGATGACA | GCTTGGGTAT | CACGAAAGTC  |
| 301 | GCAGAACCAA  | TCGGTATTGT | CGCGGCAATT | GTCCCGACCA | CTAATCCGAC | CAGCACC CGG |
| 361 | ATCTTCAAGA  | GCTTGATCAG | CCTGAAAACC | CGCAACGCGA | TTTTCTTCAG | CCCGCACCCG  |
| 421 | CGTGCGAAGA  | AGAGCACCAT | CGCAGCGGCT | AAGCTGATTT | TGGATGCCGC | GGTTAAGGCC  |
| 481 | GGTGACCCGA  | AAAACATTAT | TGGCTGGATT | GACGAGCCGA | GCATTGAGCT | GTCTCAGGAC  |
| 541 | CTGATGAGCG  | AAGCGGACAT | TATTCTGGCC | ACCGGTGGTC | CGTCTATGGT | TAAGGCAGCG  |
| 601 | TACTCCAGCG  | GTAAGCCTGC | TATCGGCGTT | GGTGCGGGCA | ATACGCCGGC | TATCATCGAT  |

|      |            |             |            |            |             |            |
|------|------------|-------------|------------|------------|-------------|------------|
| 661  | GAAAGCGCGG | ATATTGATAT  | GGCAGTTAGC | TCCATCATTC | TGTCCAAAAC  | CTACGACAAT |
| 721  | GGTGTATCT  | GTGCAAGCGA  | GCAAAGCATC | CTGGTGATGA | ATAGCATTTA  | CGAGAAGGTC |
| 781  | AAAGAAGAGT | TTGTTAAGCG  | TGGTTCCTAT | ATTCTGAACC | AGAACGAGAT  | TGCAAAAATC |
| 841  | AAAGAAACGA | TGTTTAAGAA  | TGGCGCGATT | AATGCAGATA | TTGTTGGTAA  | GTCCGCATAC |
| 901  | ATTATCGCGA | AGATGGCGGG  | TATCGAAGTG | CCGCAAACCA | CCAAAATCTT  | GATCGGCGAA |
| 961  | GTGCAGAGCG | TGGAGAAGAG  | CGAACTGTTC | AGCGAGGAGC | TGCTGAGCCC  | GGTCTGGCT  |
| 1021 | ATGTACAAAG | TGAAGGACTT  | TGACGAAGCC | CTGAAGAAAG | CTCAGCGTCT  | GATTGAGCTG |
| 1081 | GGCGGCAGCG | GTCACACGAG  | CAGCCTGTAT | ATCGATAGCC | AAAACAATAA  | GGACAAGGTG |
| 1141 | AAAGAGTTCG | GTCTGGCGAT  | GAAAACCTCT | CGCACGTTTA | TCAACATGCC  | GAGCAGCCAA |
| 1201 | GGTGCAGGCG | GCGATCTGTA  | TAACCTCGCA | ATCGCGCCTT | CTTTTACGCT  | GGGTTGCGGT |
| 1261 | ACCTGGGGCG | GTAATTTCGGT | GAGCCAGAAT | GTCGAGCCGA | AGCACCTGCT  | GAACATCAAA |
| 1321 | TCGGTTCGCG | AGCCCGTGA   | GAAGAGACCG | TGGTTCAAAG | TCCCACAGAA  | AATTTACTTC |
| 1381 | AAATACGGCT | GCCTGCGTTC  | CGCGCTGAAA | GAAGTAAAAG | ACATGAACAA  | AAAGCGTGCG |
| 1441 | TTCATTGTTA | CCGACAAAGA  | CCTGTTCAAA | CTGGGTTACG | TGAACAAAAT  | CACCAAAGTT |
| 1501 | CTGGATGAAA | TTGACATCAA  | GTACTCCATC | TTCACTGATA | TCAAATCCGA  | CCCAACGATT |
| 1561 | GATAGCGTGA | AAAAGGGCGC  | TAAAGAAATG | CTGAACTTTG | AACCGGACAC  | CATCATCAGC |
| 1621 | ATCGGTGGTG | GCTCTCCTAT  | GGATGCTGCG | AAGGTCATGC | ACCTGCTGTA  | CGAATACCCG |
| 1681 | GAAGCGGAAA | TCGAAAACCT  | GGCTATCAAC | TTCATGGACA | TCCGCAAACG  | TATCTGCAAC |
| 1741 | TTCCCGAAGC | TGGGCACTAA  | AGCTATTTCC | GTTGCCATCC | CGACTACCGC  | GGGCACTGGT |
| 1801 | TCCGAAGCCA | CGCCGTTCGC  | CGTGATCACC | AACGATGAAA | CCGGTATGAA  | ATACCCGCTG |
| 1861 | ACCTCTTACG | AACTGACCCC  | GAACATGGCA | ATTATCGACA | CCGAGCTGAT  | GCTGAACATG |
| 1921 | CCGCGCAAGC | TGACCGCTGC  | TACCGGCATC | GACGCTCTGG | TACATGCTAT  | TGAGGCGTAC |
| 1981 | GTTTCCGTGA | TGGTACCGA   | TTACACCGAC | GAAGTGGCCC | TGCGTGCGAT  | CAAAATGATT |
| 2041 | TTCAAGTACC | TGCTTCGCGC  | TTACAAAAC  | GGCACAATG  | ACATCGAGGC  | GCGTGAGAAA |
| 2101 | ATGGCCCATG | CAAGCAACAT  | CGCGGGCATG | GCCTTCGCCA | ACGCGTTCCCT | GGGCGTGTGC |
| 2161 | CACTCTATGG | CTCACAAACT  | GGGTGCTATG | CACCACGTGC | CGCACGGTAT  | CGCGTGTGCT |
| 2221 | GTCCTGATCG | AAGAAGTAAT  | TAAGTACAAC | GCTACTGATT | GCCCAGCTAA  | ACAGACCGCC |
| 2281 | TTCCACAGT  | ACAAATCTCC  | TAACGCTAAA | CGTAAGTACG | CTGAGATCGC  | CGAATACCTG |
| 2341 | AACCTGAAGG | GTACGAGCGA  | CACTGAGAAA | GTTACTGCGC | TGATCGAAGC  | TATCTCTAAA |
| 2401 | CTGAAAATTG | ACCTGTCCAT  | CCCGCAGAAC | ATCAGCGCCG | CAGGCATCAA  | CAAAAAGGAC |
| 2461 | TTTTACAACA | CGCTGGACAA  | AATGAGCGAA | CTGGCTTTTG | ACGACCAGTG  | CACCACTGCA |
| 2521 | AACCCGCGTT | ACCCGCTGAT  | CTCTGAGCTG | AAAGACATTT | ATATCAAATC  | TTTTTAA    |

**AdhE2.18 (76947)**

|      |            |             |            |            |            |            |
|------|------------|-------------|------------|------------|------------|------------|
| 1    | ATGAAAGTGA | CGAACCAAAA  | AGAAGTAAA  | CAAAAAGTGA | ATGAACTGCG | TGAGGCCCG  |
| 61   | AAAAAGTTCG | CTACGTATAC  | CCAGGAGCAA | GTTGACAAGA | TCTTCAAACA | GTGTGCCATT |
| 121  | GCGGTGCGCA | AAGAGCGTAT  | TAACCTGGCC | AAACTGGCGG | TGGAAGAAAC | CGGCATCGGT |
| 181  | CTGGTCGAGG | ACAAGATTAT  | CAAGAATCAC | TTTGCCGCGG | AGTATATCTA | CAACAAATAC |
| 241  | AAAAACACA  | AGACTTGC    | CATCATTTAT | CATGATGACA | GCTTGGGTAT | CACGAAAGTC |
| 301  | GCAGAACCAA | TCGGTATTGT  | CGCGGCAATT | GTCCCGACCA | CTAATCCGAC | CAGCACC    |
| 361  | ATCTTCAAGA | GCTTGATCAG  | CCTGGCGACC | CGCAACGCGA | TTTTCTTCAG | CCCGCACCCG |
| 421  | CGTGCGAAGA | AGAGCACCAT  | CGCAGCGGCG | AAGCTGATTT | TGGATGCCCG | GGTTAAGGCC |
| 481  | GGTGACCGA  | AAAACATTAT  | TGGCTGGATT | GACGAGCCGA | GCATTGAGCT | GTCTCAGGAC |
| 541  | CTGATGAGCG | AAGCGGACAT  | TATTCTGGCC | ACCGGTGGTC | CGTCTATGGT | TAAGGCAGCG |
| 601  | TACTCCAGCG | GTAAGCCTGC  | TATCGGCGTT | GGTGGCGGCA | ATACGCCGGC | TATCATCGAT |
| 661  | GAAAGCGCGG | ATATTGATAT  | GGCAGTTAGC | TCCATCATTC | TGTCCAAAAC | CTACGACAAT |
| 721  | GGTGTATCT  | GTGCAAGCGA  | GCAAAGCATC | CTGGTGATGA | ATAGCATTTA | CGAGAAGGTC |
| 781  | AAAGAAGAGT | TTGTTAAGCG  | TGGTTCCTAT | ATTCTGAACC | AGAACGAGAT | TGCAAAAATC |
| 841  | AAAGAAACGA | TGTTTAAGAA  | TGGCGCGATT | AATGCAGATA | TTGTTGGTAA | GTCCGCATAC |
| 901  | ATTATCGCGA | AGATGGCGGG  | TATCGAAGTG | CCGCAAACCA | CCAAAATCTT | GATCGGCGAA |
| 961  | GTGCAGAGCG | TGGAGAAGAG  | CGAACTGTTC | AGCCATGAGA | AACTGAGCCC | GGTCTGGCT  |
| 1021 | ATGTACAAAG | TGAAGGACTT  | TGACGAAGCC | CTGGACAAAG | CTCAGCGTCT | GATTGAGCTG |
| 1081 | GGCGGCAGCG | GTCACACGAG  | CAGCCTGTAT | ATCGATAGCC | AAAACAATAA | GGACAAGGTG |
| 1141 | AAAGAGTTCG | GTCTGGCGAT  | GAAAACCTCT | CGCACGTTTA | TCAACATGCC | GAGCAGCCAA |
| 1201 | GGTGCAGGCG | GCGATCTGTA  | TAACCTCGCA | ATCGCGCCTT | CTTTTACGCT | GGGTTGCGGT |
| 1261 | ACCTGGGGCG | GTAATTTCGGT | GAGCCAGAAT | GTCGAGCCGA | AGCACCTGCT | GAACATCAAA |
| 1321 | TCGGTTCGCG | AGCCCGTGA   | GAAGAGACCG | TGGTTCAAAG | TCCCACAGAA | AATTTACTTC |
| 1381 | AAATACGGCT | GCCTGCGTTC  | CGCGCTGAAA | GAAGTAAAAG | ACATGAACAA | AAAGCGTGCG |
| 1441 | TTCATTGTTA | CCGACAAAGA  | CCTGTTCAAA | CTGGGTTACG | TGAACAAAAT | CACCAAAGTT |
| 1501 | CTGGATGAAA | TTGACATCAA  | GTACTCCATC | TTCACTGATA | TCAAATCCGA | CCCAACGATT |
| 1561 | GATAGCGTGA | AAAAGGGCGC  | TAAAGAAATG | CTGAACTTTG | AACCGGACAC | CATCATCAGC |
| 1621 | ATCGGTGGTG | GCTCTCCTAT  | GGATGCTGCG | AAGGTCATGC | ACCTGCTGTA | CGAATACCCG |

|      |            |            |            |            |             |             |
|------|------------|------------|------------|------------|-------------|-------------|
| 1681 | GAAGCGGAAA | TCGAAAACCT | GGCTATCAAC | TTCATGGACA | TCCGCAAACG  | TATCTGCAAC  |
| 1741 | TTCCCGAAGC | TGGGCACTAA | AGCTATTTCC | GTTGCCATCC | CGACTACCGC  | GGGCACTGGT  |
| 1801 | TCCGAAGCCA | CGCCGTTCGC | CGTGATCACC | AACGATGAAA | CCGGTATGAA  | ATACCCCGTG  |
| 1861 | ACCTCTTACG | AACTGACCCC | GAACATGGCA | ATTATCGACA | CCGAGCTGAT  | GCTGAACATG  |
| 1921 | CCGCGCAAGC | TGACCGCTGC | TACCGGCATC | GACGCTCTGG | TACATGCTAT  | TGAGGCGTAC  |
| 1981 | GTTTCCGTGA | TGGTACCGA  | TTACACCGAC | GAAGTGGCCC | TGCGTGCGAT  | CAAAAATGATT |
| 2041 | TTCAAGTACC | TGCCCTCGCG | TTACAAAAAC | GGCACGAATG | ACATCGAGGC  | GCGTGAGAAA  |
| 2101 | ATGGCCCATG | CAAGCAACAT | CGCGGGCATG | GCCTTCGCCA | ACGCGTTCCCT | GGGCGTGTGC  |
| 2161 | CACTCTATGG | CTCACAACCT | GGGTGCTATG | CACCACGTGC | CGCACGGTAT  | CGCGTGTGCT  |
| 2221 | GTCTGATCG  | AAGAAGTAAT | TAAGTACAAC | GCTACTGATT | GCCCCACTAA  | ACAGACCCGC  |
| 2281 | TTCCCACAGT | ACAAATCTCC | TAACGCTAAA | CGTAAGTACG | CTGAGATCGC  | CGAATACCTG  |
| 2341 | AACCTGAAGG | GTACGAGCGA | CACTGAGAAA | GTTACTGCGC | TGATCGAAGC  | TATCTCTAAA  |
| 2401 | CTGAAAATTG | ACCTGTCCAT | CCCGCAGAAC | ATCAGCGCCG | CAGGCATCAA  | CAAAAAGGAC  |
| 2461 | TTTTACAACA | CGCTGGACAA | AATGAGCGAA | CTGGCTTTTG | ACGACCAGTG  | CACCACTGCA  |
| 2521 | AACCCGCGTT | ACCCGCTGAT | CTCTGAGCTG | AAAGACATTT | ATATCAAATC  | TTTTTTAA    |

**AdhE2.19 (76948)**

|      |            |            |            |            |             |             |
|------|------------|------------|------------|------------|-------------|-------------|
| 1    | ATGAAAGTGA | CGAACCAAAA | AGAAGTAAAA | CAAAAAGTGA | ATGAACTGCG  | TGAGGCCAG   |
| 61   | AAAAAGTTCG | CTACGTATAC | CCAGGAGCAA | GTTGACAAGA | TCTTCAAACA  | GTGTGCCATT  |
| 121  | GCGGTGCCA  | AAGAGCGTAT | TAACCTGGCC | AAACTGGCCG | TGGAAGAAAAC | CGGCATCGGT  |
| 181  | CTGGTCCGAG | ACAAGATTAT | CAAGAATCAC | TTTGCCGCGG | AGTATATCTA  | CAACAAGAG   |
| 241  | AAAAACGAAA | AGACTTGGCG | CATCATTGAT | CATGATGACA | GCTTGGGTAT  | CACGAAAGTC  |
| 301  | GCAGAACCAA | TCGGTATTGT | CGCGGCAATT | GTCCCGACCA | CTAATCCGAC  | CAGCACCGCG  |
| 361  | ATCTTCAAGA | GCTTGATCAG | CCTGAAAACC | CGCAACGCGA | TTTTCTTCAG  | CCCGCACCCG  |
| 421  | CGTGCGAAGA | AGAGCACCAT | CGCAGCGGCG | AAGCTGATTT | TGGATGCCCG  | GGTTAAGGCC  |
| 481  | GGTGACCCGA | AAAACATTAT | TGGCTGGATT | GACGAGCCGA | GCATTGAGCT  | GTCTCAGGAC  |
| 541  | CTGATGAGCG | AAGCGGACAT | TATTCTGGCC | ACCGGTGGTC | CGTCTATGGT  | TAAGGCAGCG  |
| 601  | TACTCCAGCG | GTAAGCCTGC | TATCGCGGTT | GGTGCGGGCA | ATACGCCCGC  | TATCATCGAT  |
| 661  | GAAAGCGCGG | ATATTGATAT | GGCAGTTAGC | TCCATCATTC | TGTCCAAAAC  | CTACGACAAT  |
| 721  | GGTGTATCT  | GTGCAAGCGA | GCAAAGCATC | CTGGTGATGA | ATAGCATTTA  | CGAGAAGGTC  |
| 781  | AAAGAAGAGT | TTGTTAAGCG | TGGTTCCTAT | ATCTGAACC  | AGAACGAGAT  | TGCAAAAATC  |
| 841  | AAAGAAACGA | TGTTTAAGAA | TGGCGCGATT | AATGCAGATA | TTGTTGGTAA  | GTCCGCATAC  |
| 901  | ATTATCCGCA | AGATGGCGGG | TATCGAAGTG | CCGCAAACCA | CCAAAATCTT  | GATCGGCGAA  |
| 961  | TTGCAGAGCG | TGGAGAAGAG | CGAACTGTTC | AGCCATGAGA | AACTGAGCCC  | GGTCTGGCT   |
| 1021 | ATGTACAAAG | TGAAGGACTT | TGACGAAGCC | CTGAAGAAAG | CTCAGCGTCT  | GATTGAGCTG  |
| 1081 | GGCGGCAGCG | GTCACACGAG | CAGCCTGTAT | ATCGATAGCC | AAAACAATAA  | GGACAAGGTG  |
| 1141 | AAAGAGTTCG | GTCTGGCGAT | GAAAACCTCT | CGCACGTTTA | TCAACATGCC  | GAGCAGCCAA  |
| 1201 | GGTGCAGAGC | GCGATCTGTA | TAACCTCGCA | ATCGCGCCTT | CTTTTACGCT  | GGGTTGCGGT  |
| 1261 | ACCTGGGGCG | GTAATTCGGT | GAGCCAGAAT | GTCGAGCCGA | AGCACCTGCT  | GAACATCGTT  |
| 1321 | TCGGTCCGCG | GTCGCCGTGA | GAAGAGACCT | TGGTTCAAAG | TCCCACAGAA  | AATTTACTTC  |
| 1381 | AAATACGGCT | GCCTGCGTTT | CGCGCTGAAA | GAAGTGAAG  | ACATGAACAA  | AAAGCTGCGG  |
| 1441 | TTCATTGTTA | CCGACAAAAG | CCTGTTCAAA | CTGGGTTACG | TGAACAAAAT  | CACCAAAGTT  |
| 1501 | CTGGATGAAA | TTGACATCAA | GTACTCCATC | TTCACTGATA | TCAAATCCGA  | CCCAACGATT  |
| 1561 | GATAGCGTGA | AAAAGGGCGC | TAAAGAAATG | CTGAACCTTG | AACCGGACAC  | CATCATCAGC  |
| 1621 | ATCGGTGGTG | GCTCTCCTAT | GGATGCTGCG | AAGGTCATGC | ACCTGCTGTA  | CGAATACCCG  |
| 1681 | GAAGCGGAAA | TCGAAAACCT | GGCTATCAAC | TTCATGGACA | TCCGCAAACG  | TATCTGCAAC  |
| 1741 | TTCCCGAAGC | TGGGCACTAA | AGCTATTTCC | GTTGCCATCC | CGACTACCGC  | GGGCACTGGT  |
| 1801 | TCCGAAGCCA | CGCCGTTCGC | CGTGATCACC | AACGATGAAA | CCGGTATGAA  | ATACCCCGTG  |
| 1861 | ACCTCTTACG | AACTGACCCC | GAACATGGCA | ATTATCGACA | CCGAGCTGAT  | GCTGAACATG  |
| 1921 | CCGCGCAAGC | TGACCGCTGC | TACCGGCATC | GACGCTCTGG | TACATGCTAT  | TGAGGCGTAC  |
| 1981 | GTTTCCGTGA | TGGTACCGA  | TTACACCGAC | GAAGTGGCCC | TGCGTGCGAT  | CAAAAATGATT |
| 2041 | TTCAAGTACC | TGCCCTCGCG | TTACAAAAAC | GGCACGAATG | ACATCGAGGC  | GCGTGAGAAA  |
| 2101 | ATGGCCCATG | CAAGCAACAT | CGCGGGCATG | GCCTTCGCCA | ACGCGTTCCCT | GGGCGTGTGC  |
| 2161 | CACTCTATGG | CTCACAACCT | GGGTGCTATG | CACCACGTGC | CGCACGGTAT  | CGCGTGTGCT  |
| 2221 | GCTCTGATCG | AAGAAGTAAT | TAAGTACAAC | GCTACTGATT | GCCCCACTAA  | ACAGACCCGC  |
| 2281 | TTCCCACAGT | ACAAATCTCC | TAACGCTAAA | CGTAAGTACG | CTGAGATCGC  | CGAATACCTG  |
| 2341 | AACCTGAAGG | GTACGAGCGA | CACTGAGAAA | GTTACTGCGC | TGATCGAAGC  | TATCTCTAAA  |
| 2401 | CTGAAAATTG | ACCTGTCCAT | CCCGCAGAAC | ATCAGCGCCG | CAGGCATCAA  | CAAAAAGGAC  |
| 2461 | TTTTACAACA | CGCTGGACAA | AATGAGCGAA | CTGGCTTTTG | ACGACCAGTG  | CACCACTGCA  |
| 2521 | AACCCGCGTT | ACCCGCTGAT | CTCTGAGCTG | AAAGACATTT | ATATCAAATC  | TTTTTTAA    |



**AdhE2.20 (76949)**

```

1 ATGAAAGTGA CGAACCAAAA AGAACTGAAA CAAAAACTGA ATGAACTGCG TGAGGCCAG
61 AAAAAAGTTCG CTACGTATAC CCAGGAGCAA GTTGACAAGA TCTTCAAACA GTGTGCCATT
121 GCGGCTGCCA AAGAGCGTAT TAACTTGGCC AAACTGGCGG TGAAGAAAAC CGGCATCGGT
181 CTGGTCGAGG ACAAGATTAT CAAGAATCAC TTTGCCGCGG AGTATATCTA CAACAAATAC
241 AAAAAACGAAA AGACTTGCGG CATCATTGAT CATGATGACA GCTTGGGTAT CACGAAAGTC
301 GCAGAACCAA TCGGTATTGT CGCGGCAATT GTCCCGACCA CTAATCCGAC CAGCACCCGG
361 ATCTTCAAGA GCTTGATCAG CCTGAAAACC CGCAACGCGA TTTTCTTCAG CCCGCACCCG
421 CGTGCGAAGA AGAGCACCAT CGCAGCGCGC AAGCTGATTT TGGATGCCGC GGTAAAGGCC
481 GGTGCACCGA AAAACATTAT TGGCTGGATT GACGAGCCGA GCATTGAGCT GTCTCAGGAC
541 CTGATGAGCG AAGCGGACAT TATTCTGGCC ACCGGTGGTC CGTCTATGGT TAAGGCAGCG
601 TACTCCAGCG GTAAGCCTGC TATCGGCGCG GGTGCGGGCA ATACGCCGGC TATCATCGAT
661 GAAAGCGCGG ATATTGATAT GGCAGTTAGC TCCATCATT C TGCCAAAAC CTACGACAAT
721 GGTGTTATCT GTGCAAGCGA GCAAAGCATC CTGGTGATGA ATAGCATTTA CGAGAAGGTC
781 AAAGAAAGAGT TTGTTAAGCG TGGTTCCTAT ATTCTGAACC AGAACGAGAT TGCAAAAATC
841 AAAGAAACGA TGTTAAGAA TGCGCGGATT AATGCAGATA TTGTTGGTAA GTCCGCATAC
901 ATTATCGCGA AGATGGCGGG TATCGAAGTG CCGCAAACCA CCAAATCTT GATCGGCGAA
961 GTGCAGGACG TGGAGAAGAG CGAACTGTTC AGCGTTGAGA AACTGAGCCC GGTTCCTGGCT
1021 ATGTACAAAG TGAAGGACTT TGACGAAGCC CTGAAGAAAAG CTCAGCGTCT GATTGAGCTG
1081 GGCGCAGCG GTACACGAG CAGCCTGTAT ATCGATAGCC AAAACAATAA GGACAAGGTG
1141 AAAGAGTTCG GTCTGGCGAT GAAAACCTCT CGCACGTTTA TCAACATGCC GAGCAGCCAA
1201 GGTGCGAGCG GCGATCTGTA TAACCTCGCA ATCGCGCCTT CTTTTACGCT GGGTTGCGGT
1261 ACCTGGGGCG GTAATTCGGT GAGCCAGAAT GTCGAGCCGA AGCACTGCT GAACATCAAA
1321 TCGGTCGCGG AGCGCCGTGA GAAGAGACCG TGGTTCAAAG TCCCACAGAA AATTTACTTC
1381 AAATACGGCT GCCTGCGTTT CGCGTGAAA GAACTGAAAG ACATGAACAA AAAGCGTGCG
1441 TTCATGTGTA CCGACAAAGA CCTGTTCAAA CTGGGTTACG TGAACAAAAT CACCAAAGTT
1501 CTGGATGAAA TTGACATCAA GTACTCCATC TTCACTGATA TCAAATCCGA CCCAACGATT
1561 GATAGCGTGA AAAAGGGCGC TAAAGAAATG CTGAACTTTG AACCGGACAC CATCATCAGC
1621 ATCGGTGGTG GCTCTCCTAT GGATGCTGCG AAGGTCATGC ACCTGCTGTA CGAATACCCG
1681 GAAGCGGAAA TCGAAAACCT GGCTATCAAC TTCATGGACA TCCGCAAACG TATCTGCAAC
1741 TTCCCGAAGC TGGGCACTAA AGCTATTTCC GTTGCCATCC CGACTACCGC GGGCACTGGT
1801 TCCGAAGCCA CGCGTTCGCG CGTGATCACC AACGATGAAA CCGGTATGAA ATACCCGCTG
1861 ACCTCTTACG AACTGACCCC GAACATGGCA ATTATCGACA CCGAGCTGAT GCTGAACATG
1921 CCGCGCAAGC TGACCGCTGC TACCGGCATC GACGCTCTGG TACATGCTAT TGAGGCGTAT
1981 GTTTCGCTGA TGGTACCGA TTACACCGAC GAACTGGCCC TGCGTGCGAT CAAAATGATT
2041 TTCAAGTACC TGCCTCGCGC TTACAAAAAC GGCACGAATG ACATCGAGGC GCGTGAGAAA
2101 ATGGCCCATG CAAGCAACAT CGCGGGCATG GCCTTCGCCA ACGCGTTTCT GGGCGTGTGC
2161 CACTCTATGG CTCACAAACT GGGTGTATG CACCACGTGC CGCACGGTAT CGCGTGTGCT
2221 GTCCTGATCG AAGAAGTAAT TAAGTACAAC GCTACTGATT GCCCGACTAA ACAGACCGCC
2281 TTCCCACAGT ACAAATCTCC TAACGCTAAA CGTAAGTACG CTGAGATCGC CGAATACCTG
2341 AACCTGAAGG GTACGAGCGA CACTGAGAAA GTTACTGCGC TGATCGAAGC TATCTCTAAG
2401 CTGAAAATG ACCTGTCCAT CCGCAGAAC ATCAGCGCCG CAGGCATCAA CAAAATAAGAC
2461 TTTTACAACA CGCTGGACAA AATGAGCGAA CTGGCTTTTG ACGACCAGTG CACCCTGCA
2521 AACCCGCGTT ACCCGCTGAT CTCTGAGCTG AAAGACATTT ATATCAAATC TTTTAA

```

**AdhE2.21 (76950)**

```

1 ATGAAAGTGA CGAACCAAAA AGAACTGAAA CAAAAACTGA ATGAACTGCG TGAGGCCAG
61 AAAAAAGTTCG CTACGTATAC CCAGGACCAA GTTGACAAGA TCTTCAAACA GTGTGCCATT
121 GCGGCTGCCA AAGAGCGTAT TAACTTGGCC AAACTGGCGG TGAAGAAAAC CGGCATCGGT
181 CTGGTCGAGG ACAAGATTAT CAAGAATCAC TTTGCCGCGG AGTATATCTA CAACAAATAC
241 AAAAAACGAAA AGACTTGCGG CATCATTGAT CATGATGACA GCTTGGGTAT CACGAAAGTC
301 GCAGAACCAA TCGGTATTGT CGCGGCAATT GTCCCGACCA CTAATCCGAC CAGCACCCGG
361 ATCTTCAAGA GCTTGATCAG CCTGAAAACC CGCAACGCGA TTTTCTTCAG CCCGCACCCG
421 CGTGCGAAGA AGAGCACCAT CGCAGCGCGC AAGCTGATTT TGGATGCCGC GGTAAAGGCC
481 GGTGCACCGA AAAACATTAT TGGCTGGATT GACGAGCCGA GCATTGAGCT GTCTCAGGAC
541 CTGATGAAAG AAGCGGACAT TATTCTGGCC ACCGGTGGTC CGTCTATGGT TAAGGCAGCG
601 TACTCCAGCG GTAAGCCTGC TATCGGCGTT GGTGCGGGCA ATACGCCGGC TATCATCGAT
661 GAAAGCGCGG ATATTGATAT GGCAGTTAGC TCCATCATT TGCCAAAAC CTACGACAAT
721 GGTGTTATCT GTGCAAGCGA GCAAAGCATC CTGGTGATGA ATAGCATTTA CGAGAAGGTC
781 AAAAAAGAGT TTGTTAAGCG TGGTTCCTAT ATTCTGAACC AGAACGAGAT TGCAAAAATC
841 AAAGAAACGA TGTTAAGAA TGCGCGGATT AATGCAGATA TTGTTGGTAA GTCCGCATAC

```

901 ATTATCGCGA AGATGGCGGG TATCGAAGTG CCGCAAACCA CAAAATCTT GATCGGCGAA  
 961 GTGCAGAGCG TGGAGAAGAG CGAACTGTTC AGCCATGAGA AACTGAGCCC GGTTCCTGGCT  
 1021 ATGTACAAAG TGAAGGACTT TGACGAAGCC CTGAAGAAAG CTCAGCGTCT GATTGAGCTG  
 1081 GGCGGCAGCG GTCACACGAG CAGCCTGTAT ATCGATAGCC AAAACAATAA GGACAAGGTG  
 1141 AAAGAGTTCG GTCTGGCGAT GAAAACCTCT CGCACGTTTA TCAACATGCC GAGCAGCCAA  
 1201 GGTGCGAGCG GCGATCTGTA TAACTTCGCA ATCGCGCCTT CTTTTACGCT GGGTTGCGGT  
 1261 ACCTGGGGCG GTAATTCGGT GAGCCAGAAT GTCGAGCCGA AGCACCTGCT GAACATCAAA  
 1321 TCGGTCGCGG AGCGCCGTGA GAAGAGACCG TGGTTCAAAG TCCCACAGAA AATTTACTTC  
 1381 AAATACGGCT GCCTGCGTTT CGCGCTGAAA GAACTGAAAG ACATGAACAA AAAGCGTGCG  
 1441 TTCATTGTTA CCGACAAAGA CCTGTTCAAA CTGGGTTACG TGAACAAAAT CACCAAAGTT  
 1501 CTGGATGAAA TTGACATCAA GTACTCCATC TTCACTGATA TCAAATCCGA CCCAACGATT  
 1561 GATAGCGTGA AAAAGGGCGC TAAAGAAATG CTGAACTTTG AACCGGACAC CATCATCAGC  
 1621 ATCGGTGGTG GCTCTCCTAT GGATGCTGCG AAGGTCATGC ACCTGCTGTA CGAATACCCG  
 1681 GAAGCGGAAA TCGAAAACCT GGCTATCAAC TTCATGGACA TCCGCAAACG TATCTGCAAC  
 1741 TTCCCGAAGC TGGGCACTAA AGCTATTTCC GTTGCCATCC CGACTACCGC GGGCACTGGT  
 1801 TCCGAAGCCA CGCCGTTTCG CGTGATCACC AACGATGAAA CCGGTATGAA ATACCCGCTG  
 1861 ACCTCTTACG AACTGACCCC GAACATGGCA ATTATCGACA CCGAGCTGAT GCTGAACATG  
 1921 CCGCGCAAGC TGACCGCTGC TACCGGCATC GACGCTCTGG TACATGCTAT TGAGGCGTAC  
 1981 GTTTCGCGTA TGGTACCGA TTACACCGAC GAACTGGCCC TCGTTCGAT CAAAATGATT  
 2041 TTCAAGTACC TGCTCGCGC TTACAAAAAC GGCACGAATG ACATCGAGGC GCGTGAGAAA  
 2101 ATGGCCATG CAAGCAACAT CGCGGGCATG GCCTTCGCCA ACGCGTTCC TGGCGTGTGC  
 2161 CACTCTATGG CTCACAAACT GGGTGTATG CACCACGTGC CGCACGGTAT CGCGTGTGCT  
 2221 GTCCTGATCG AAGAAGTAAT TAAGTACAAC GCTACTGATT GCCCGACTAA ACAGACCCGC  
 2281 TTCCACAGT ACAAATCTCC TAACGCTAAA CGTAAGTACG CTGAGATCGC CGAATACCTG  
 2341 AACCTGAAGG GTACGAGCGA CACTGAGAAA GTTACTGCGC TGATCGAAGC TATCTCTAAA  
 2401 CTGAAAATTG ACCTGTCCAT CCCGCGAAGC ATCAGCGCCG CAGGCATCAA CAAAAAGGAC  
 2461 TTTTACAACA CGCTGGACAA AATGAGCGAA CTGGCTTTTG ACGACCAGTG CACCACTGCA  
 2521 AACCCGCGTT ACCCGCTGAT CTCTGAGCTG AAAGACATTT ATATCAAATC TTTTTAA

**AdhE2.22 (76951)**

1 ATGAAAGTGA CGAACCAAAA AGAACTGAAA CAAAACTGA ATGAACTGCG TGAGGCCAG  
 61 AAAAAGTTCG CTACGTATAC CCAGGAGCAA GTTGACAAGT TCTTCAAACA GTGTGCCATT  
 121 GCGGTGCGCA AAGAGCGTAT TAACTTGGCC CGTCTGGCGG TGAAGAAAC CGGCATCGGT  
 181 CTGGTCGAGG ACAAGATTAT CAAGAATCAC TTTGCCGCGG AGTATATCTA CAACAAATAC  
 241 AAAAACGAAA AGACTTGCGG CATCATTGAT CATGATGACA GCTTGGGTAT CACGAAAGTC  
 301 CAGAACCAA TCGGTATTGT CGCGGCAATT GTCCGACCA CTAATCCGAC CAGCACCGCG  
 361 ATCTTCAAGA GCTTGATCAG CCTGAAAACC CGCAACGCGA TTTTCTTCAG CCCGCACCCG  
 421 CGTGCGAAGA AGAGCACCAT CGCAGCGGCG AAGCTGATTT TGGATGCCGC GGTTAAGGCC  
 481 GGTGCACCGA AAAACATTAT TGGCTGGATT GACGAGCCGA GCATTGAGCT GTCTCAGGAC  
 541 CTGATGAGCG AAGCGGACAT TATTCTGGCC ACCGGTGGTC CGTCTATGGT TAAGGCAGCG  
 601 TACTCCAGCG GTAAGCCTGC TATCGGCGTT GGTGCGGGCA ATACGCCGGC TATCATCGAT  
 661 GAAAGCGCGG ATATTGATAT GGCAGTTAGC TCCATCATT TGTCCAAAAC CTACGACAAT  
 721 GGTGTTATCT GTGCAAGCGA GCAAAGCATC CTGGTGATGA ATAGCATTTA CGAAGAGTTC  
 781 AAAGAAGAGT TTGTTAAGCG TGGTTCCTAT ATTCTGAACC AGAACGAGAT TGCAAAAATC  
 841 AAAGAAACGA TGTTAAGAA TGGCGCGATT AATGCAGATA TTGTTGGTAA GTCCGCATAC  
 901 ATTATCGCGA AGATGGCGGG TATCGAAGTG CCGCAAACCA CAAAATCTT GATCGGCGAA  
 961 GTGCAGAGCG TGGAGGCGAG CGAACTGTTC AGCCATGAGA AACTGAGCCC GGTTCCTGGCT  
 1021 ATGTACAAAG TGAAGGACTT TGACGAAGCC CTGAAGAAAG CTCAGCGTCT GATTGAGCTG  
 1081 GGCGGCAGCG GTCACACGAG CAGCCTGTAT ATCGATAGCC AAAACAATAA GGACAAGGTG  
 1141 AAAGAGTTCG GTCTGGCGAT GAAAACCTCT CGCACGTTTA TCAACATGCC GAGCAGCCAA  
 1201 GGTGCGAGCG GCGATCTGTA TAACTTCGCA ATCGCGCCTT CTTTTACGCT GGGTTGCGGT  
 1261 ACCTGGGGCG GTAATTCGGT GAGCCAGAAT GTCGAGCCGA AGCACCTGCT GAACATCAAA  
 1321 TCGGTCGCGG AGCGCCGTGA GAAGAGACCG TGGTTCAAAG TCCCACAGAA AATTTACTTC  
 1381 AAATACGGCT GCCTGCGTTT CGCGCTGAAA GAACTGAAAG ACATGAACAA AAAGCGTGCG  
 1441 TTCATTGTTA CCGACAAAGA CCTGTTCAAA CTGGGTTACG TGAACAAAAT CACCAAAGTT  
 1501 CTGGATGAAA TTGACATCAA GTACTCCATC TTCACTGATA TCAAATCCGA CCCAACGATT  
 1561 GATAGCGTGA AAAAGGGCGC TAAAGAAATG CTGAACTTTG AACCGGACAC CATCATCAGC  
 1621 ATCGGTGGTG GCTCTCCTAT GGATGCTGCG AAGGTCATGC ACCTGCTGTA CGAATACCCG  
 1681 GAAGCGGAAA TCGAAAACCT GGCTATCAAC TTCATGGACA TCCGCAAACG TATCTGCAAC  
 1741 TTCCCGAAGC TGGGCACTAA AGCTATTTCC GTTGCCATCC CGACTACCGC GGGCACTGGT  
 1801 TCCGAAGCCA CGCCGTTTCG CGTGATCACC AACGATGAAA CCGGTATGAA ATACCCGCTG  
 1861 ACCTCTTACG AACTGACCCC GAACATGGCA ATTATCGACA CCGAGCTGAT GCTGAACATG

|      |            |            |            |            |             |            |
|------|------------|------------|------------|------------|-------------|------------|
| 1921 | CCGCGCAAGC | TGACCGCTGC | TACCGGCATC | GACGCTCTGG | TACATGCTAT  | TGAGGCGTAC |
| 1981 | GTTTCCGTGA | TGGCTACCGA | TTACACCGAC | GAAGTGGCCC | TGCGTGCGAT  | CAAAATGATT |
| 2041 | TTCAAGTACC | TGCCTCGCGC | TTACAAAAAC | GGCACGAATG | ACATCGAGGC  | GCGTGAGAAA |
| 2101 | ATGGCCCATG | CAAGCAACAT | CGCGGGCATG | GCCTTCGCCA | ACGCGTTCCCT | GGGCGTGTGC |
| 2161 | CACTCTATGG | CTCACAAACT | GGGTGCTATG | CACCACGTGC | CGCACGGTAT  | CGCGTGTGCT |
| 2221 | GTCCTGATCG | AAGAAGTAAT | TAAGTACAAC | GCTACTGATT | GCCCCACTAA  | ACAGACCGCC |
| 2281 | TTCCACAGT  | ACAAATCTCC | TAACGCTAAA | CGTAAGTACG | CTGAGATCGC  | CGAATACCTG |
| 2341 | AACCTGAAGG | GTACGAGCGA | CACTGAGAAA | GTTACTGCGC | TGATCGAAGC  | TATCTCTAAA |
| 2401 | CTGAAAATTG | ACCTGTCCAT | CCCGCAGAAC | ATCAGCGCCG | CAGGCATCAA  | CAAAAAGGAC |
| 2461 | TTTTACAACA | CGCTGGACAA | AATGAGCGAA | CTGGCTTTTG | ACGACCAGTG  | CACCACTGCA |
| 2521 | AACCCGCGTT | ACCCGCTGAT | CTCTGAGCTG | AAAGACATTT | ATATCAAATC  | TTTTTTAA   |

**AdhE2.23 (76952)**

|      |            |            |             |             |             |             |
|------|------------|------------|-------------|-------------|-------------|-------------|
| 1    | ATGAAAGTGA | CGAACCAAAA | AGAAGTAAAA  | CAAAAAGTGA  | ATGAAAGTGG  | TGAGGCCCGAG |
| 61   | AAAAAGTTTC | CTACGTGCAC | CCAGGAGCAA  | GTTGACAAGA  | TCTTCAAACA  | GTGTGCCATT  |
| 121  | GCGGCTGCCA | AAGAGCGTAT | TAAGTGGGCC  | AAAGTGGCGG  | TGGAAGAAAAC | CGGCATCGGT  |
| 181  | CTGGTCGAGG | ACAAGATTAT | CAAGAATCAC  | TTTGCCGCGG  | AGTATATCTA  | CAACAAATAC  |
| 241  | AAAAACGAAA | AGACTTGCCG | CATCATTGAT  | CATGATGACA  | GCTTGGGTAT  | CACGAAAGTC  |
| 301  | GCAGAACCAA | TCGGTATTGT | CGCGGCAATT  | GTCCCGACCA  | CTAATCCGAC  | CAGCACCGCG  |
| 361  | ATCTTCAAGA | GCTTGATCAG | CCTGAAAAAC  | CGCAACGCGA  | TTTTCTTCAG  | CCCGCACCCG  |
| 421  | CGTGCGAAGA | AGAGCACCAT | CGCAGCGGCG  | AAGCTGATTT  | TGGATGCCGC  | GGTTAAGGCC  |
| 481  | GGTGCACCGA | AAAACATTAT | TGGCTGGATT  | GACGAGCCGA  | GCATTGAGCT  | GTCTCAGGAC  |
| 541  | CTGATGAGCG | AAGCGGACAT | TATTCTGGCC  | ACCGGTGGTC  | CGTCTATGGT  | TAAGGCAGCG  |
| 601  | TACTCCAGCG | GTAAGCCTGC | TATCGGCGTT  | GGTGCGGGCA  | ATACGCCGGC  | TATCATCGAT  |
| 661  | GAAAGCGCGG | ATATTGATAT | GGCAGTTAGC  | TCCATCATTC  | TGTCCGCGAC  | CTACGACAAT  |
| 721  | GGTGTATCT  | GTGCAAGCGA | GCAAAGCATC  | CTGGTGATGA  | ATAGCATTTA  | CGAGAAGGTC  |
| 781  | AAAGAAGAGT | TTGTTAAGCG | TGGTTCCTAT  | ATTCTGAACC  | AGAACGAGAT  | TGCAAAAATC  |
| 841  | AAAGAAACGA | GTTTAAGAA  | TGGCGCGATT  | AATCGTGATA  | TTGTTGGTAA  | GTCCGCATAC  |
| 901  | ATTATCGCGA | AGATGGCGGG | TATCGAAGTG  | CCGCAAAACCA | CCAAAATCTT  | GATCGGCGAA  |
| 961  | GTGCAGAGCG | TGGAGAAGAG | CGAACTGTTC  | AGCCATGAGA  | AACTGAGCCC  | GGTCTGGCT   |
| 1021 | ATGTACAAAG | TGAAGGACTT | TGACGAAGCC  | CTGAAGAAAG  | CTCAGCGTCT  | GATTGAGCTG  |
| 1081 | GGCGGCAGCG | GTCACACGAG | CAGCCTGTAT  | ATCGATAGCC  | AAAACAATAA  | GGACAAGGTG  |
| 1141 | AAAGAGTTTC | GTCTGGCGAT | GAAAACCTCT  | CGCACGTTTA  | TCAACATGCC  | GAGCAGCCAA  |
| 1201 | GGTGCAGGCG | GCGATCTGTA | TAAGTTCGCA  | ATCGCGCCTT  | CTTTTACGCT  | GGGTGCGGT   |
| 1261 | ACCTGGGGCG | GTAATTCGGT | GAGCCAGAAT  | GTCGAGCCGA  | AGCACCTGCT  | GAACATCAA   |
| 1321 | TCGGTCGCGG | AGCGCCGTGA | GAAGAGACCG  | TGGTTCAAAG  | TCCCACAGAA  | AATTTACTTC  |
| 1381 | AAATACGGCT | GCCTGCGTTT | CGCGCTGAAA  | GAAGTGAAG   | ACATGAACAA  | AAAGCGTGCG  |
| 1441 | TTCATTGTTA | CCGACAAAGA | CCTGTTCAAA  | CTGGGTTACG  | TGAACAAAAT  | CACCAAAGTT  |
| 1501 | CTGGATGAAA | TTGACATCAA | GTAAGTCCATC | TTCATGATA   | TCAAATCCGA  | CCCAACGATT  |
| 1561 | GATAGCGTGA | AAAAGGGCGC | TAAAGAAATG  | CTGAAGTTTG  | AACCGGACAC  | CATCATCAGC  |
| 1621 | ATCGGTGGTG | GCTCTCCTAT | GGATGCTGCG  | AAGGTGATGC  | ACCTGCTGTA  | CGAATACCCG  |
| 1681 | GAAGCGGAAA | TCGAAAACCT | GGCTATCAAC  | TTCATGGACA  | TCCGAAAACG  | TATCTGCAAC  |
| 1741 | TTCCCGAAGC | TGGGCACTAA | AGCTATTTCC  | GTTGCCATCC  | CGACTACCGC  | GGGCACTGGT  |
| 1801 | TCCGAAGCCA | CGCCGTTGCG | CGTGATCACC  | AACGATGAAA  | CCGGTATGAA  | ATACCCGCTG  |
| 1861 | ACCTCTTACG | AACTGACCCC | GAACATGGCA  | ATTATCGACA  | CCGAGCTGAT  | GCTGAACATG  |
| 1921 | CCGCGCAAGC | TGACCGCTGC | TACCGGCATC  | GACGCTCTGG  | TACATGCTAT  | TGAGGCGTAC  |
| 1981 | GTTTCCGTGA | TGGCTACCGA | TTACACCGAC  | GAAGTGGCCC  | TGCGTGCGAT  | CAAAATGATT  |
| 2041 | TTCAAGTACC | TGCCTCGCGC | TTACAAAAAC  | GGCACGAATG  | ACATCGAGGC  | GCGTGAGAAA  |
| 2101 | ATGGCCCATG | CAAGCAACAT | CGCGGGCATG  | GCCTTCGCCA  | ACGCGTTCCCT | GGGCGTGTGC  |
| 2161 | CACTCTATGG | CTCACAAACT | GGGTGCTATG  | CACCACGTGC  | CGCACGGTAT  | CGCGTGTGCT  |
| 2221 | GTCCTGATCG | AAGAAGTAAT | TAAGTACAAC  | GCTACTGATT  | GCCCCACTAA  | ACAGACCGCC  |
| 2281 | TTCCACAGT  | ACAAATCTCC | TAACGCTAAA  | CGTAAGTACG  | CTGAGATCGC  | CGAATACCTG  |
| 2341 | AACCTGAAGG | GTACGAGCGA | CACTGAGAAA  | GTTACTGCGC  | TGATCGAAGC  | TATCTCTAAA  |
| 2401 | CTGAAAATTG | ACCTGTCCAT | CCCGCAGAAC  | ATCAGCGCCG  | CAGGCATCAA  | CAAAAAGGAC  |
| 2461 | TTTTACAACA | CGCTGGACAA | AATGAGCGAA  | CTGGCTTTTG  | ACGACCAGTG  | CACCACTGCA  |
| 2521 | AACCCGCGTT | ACCCGCTGAT | CTCTGAGCTG  | AAAGACATTT  | ATATCAAATC  | TTTTTTAA    |

**AdhE2.24 (76953)**

|     |            |            |            |            |             |             |
|-----|------------|------------|------------|------------|-------------|-------------|
| 1   | ATGAAAGTGA | CGAACCAAAA | AGAAGTAAAA | CAAAAAGTGA | ATGAAAGTGG  | TGAGGCCCGAG |
| 61  | AAAAAGTTCA | ACACGTATAC | CCAGGAGCAA | GTTGACAAGA | TCTTCAAACA  | GTGTGCCATT  |
| 121 | GCGGCTGCCA | AAGAGCGTAT | TAAGTGGGCC | AAAGTGGCGG | TGGAAGAAAAC | CGGCATCGGT  |
| 181 | CTGGTCGAGG | ACAAGATTAT | CAAGAATCAC | TTTGCCGCGG | AGTATATCTA  | CAACAAATAC  |

241 AAAAACGAAA AGACTTGCGG CATCATTGAT CATGATGACA GCTTGGGTAT CACGAAAGTC  
 301 GCAGAACCAA TCGGTATTGT CGCGGCAATT GTCCCGACCA CTAATCCGAC CAGCACCGCG  
 361 ATCTTCAAGA GCTTGATCAG CCTGAAAACC CGCAACGCGA TTTTCTTCAG CCCGCACCCG  
 421 CGTGCGAAGA AGAGCACCAT CGCAGCGGCG AAGCTGATTT TGGATGCCGC GGTTAAGGCC  
 481 GGTGCACCGA AAAACATTAT TGGCTGGATT GACGAGCCGA GCATTGAGCT GTCTCAGGAC  
 541 CTGATGAGCG AAGCGGACAT TATTCTGGCC ACCGGTGGTC CGTCTATGGT TAAGGCAGCG  
 601 TACTCCAGCG GTAAGCCTGC TATCGGCGTT GGTGCGGGCA ATACGCCGGC TATCATCGAT  
 661 GAAAGCGCGG ATATTGATAT GGCAGTTAGC TCCATCATTC TGTCCGCGAC CTACGACAAT  
 721 GGTGTTATCT GTGCAAGCGA GCAAAGCATC CTGGTGATGA ATAGCATTTA CGAGAAGGTC  
 781 AAAGAAGAGT TTGTTAAGCG TGGTTCCTAT ATTCTGAACC AGAACGAGAT TGCAAAAATC  
 841 AAAGAAACGA TGTTAAGAA TGGCGCGATT AATGCAGATA TTGTTGGTAA GTCCGCATAC  
 901 ATTATCGCGA AGATGGCGGG TATCGAAGTG CCGCAAACCA CCAAAATCTT GATCGGCGAA  
 961 GTGCAGAGCG TGGAGAAGAG CGAACTGTTC AGCCATGAGA AACTGAGCCC GGTTCCTGGCT  
 1021 ATGTACAAAG TGAAGGACTT TGACGAAGCC CTGAAGAAAG CTGAGCGTCT GATTGAGCTG  
 1081 GGCGGCAGCG GTCACACGAG CAGCCTGTAT ATCGATAGCC AAAACAATAA GGACAAGGTG  
 1141 AAAGAGTTCG GTCTGGCGAT GAAAACCTCT CGCACGTTTA TCAACATGCC GAGCAGCCAA  
 1201 GGTGCGAGCG GCGATCTGTA TAACTTCGCA ATCGCGCCTT CTTTTACGCT GGGTTGCGGT  
 1261 AACTGGGGCG GTAATTCGGT GAGCCAGAAT GTCGAGCCGA AGCACCTGCT GAACATCAAA  
 1321 TCGGTGCGCG AGCGCCGTGA GAAGAGACCG TGGTTCAAAG TCCCACAGAA AATTTACTTC  
 1381 AAATACGGCT GCCTGCGTTT CGCGCTGAAA GAACTGAAAG ACATGAACAA AAAGCGTGCG  
 1441 TTCATTGTTA CCGACAAAGA CCTGTTCAAA CTGGGTTACG TGAACAAAAT CACCAAAGTT  
 1501 CTGGATGAAA TTGACATCAA GTACTCCATC TTCACTGATA TCAAATCCGA CCCAACGATT  
 1561 GATAGCGTGA AAAAGGGCGC TAAAGAAATG CTGAACTTTG AACCGGACAC CATCATCAGC  
 1621 ATCGGTGGTG GCTCTCCTAT GGATGCTGCG AAGGTCATGC ACCTGCTGTA CGAATACCCG  
 1681 GAAGCGGAAA TCGAAAACCT GGCTATCAAC TTCATGGACA TCCGAAAACG TATCTGCAAC  
 1741 TTCCCGAAGC TGGGCACTAA AGCTATTTCC GTTGCCATCC CGACTACCGC GGGCACTGGT  
 1801 TCCGAAGCCA CGCCGTTGCG CGTGATCACC AACGATGAAA CCGGTATGAA ATACCCGCTG  
 1861 ACCTCTTACG AACTGACCCC GAACATGGCA ATTATCGACA CCGAGCTGAT GCTGAACATG  
 1921 CCGCGCAAGC TGACCGCTGC TACCGGCATC GACGCTCTGG TACATGCTAT TGAGGCGTAC  
 1981 GTTTCGGTGA TGGTACCGA TTACACCGAC GAACTGGCCC TGGTGGCGAT CAAAATGATT  
 2041 TTCAAGTACC TGCTTCGCGC TTACAAAAAC GGCACGAATG ACATCGAGGC GCGTGAGAAA  
 2101 ATGGCCATG CAAGCAACAT CGCGGGCATG GCCTTCGCCA ACGCGTTCC TGGCGTGTGC  
 2161 CACTCTATGG CTCACAAACT GGGTGCTATG CACCACGTGC CGCACGGTAT CGCGTGTGCT  
 2221 GTCCTGATCG AAGAAGTAAT TAAGTACAAC GCTACTGATT GCCCGACTAA ACAGACCGCC  
 2281 TTCCACAGT ACAATCTCC TAACGCTAAA CGTAAGTACG CTGAGATCGC CGAATACCTG  
 2341 AACCTGAAGG GTACGAGCGA CACTGAGAAA GTTACTGCGC TGATCGAAGC TATCTCTAAA  
 2401 CTGAAAATTG ACCTGTCCAT CCCGAGAAC ATCAGCGCCG CAGGCATCAA CAAAAGGAC  
 2461 TTTTACAACA CGCTGGACAA AATGAGCGAA CTGGCTTTTG ACGACCAGTG CACCATGCA  
 2521 AACCCGCGTT ACCCGCTGAT CTCTGAGCTG AAAGACATTT ATATCAAATC TTTTTAA

**AdhE2.25 (76954)**

1 ATGAAAGTGA CGAACCAAAA AGAACTGAAA CAAAAACTGA ATGAACTGCG TGAGGCCCG  
 61 AAAAAGTTCG CTACGTATAC CCAGGAGCAA GTTGACAAGA TCTTCAAACA GTGTGCCATT  
 121 GCGGCTGCCA AACTGCGTAT TAACTTGGCC AAACTGGCGG TGAAGAAAC CGGCATCGGT  
 181 CTGGTCGAGG ACAAGATTAT CAAGAATCAC TTTGCCGCGG AGTATATCTA CAACAAATAC  
 241 AAAAACGAAA AGACTTGCGG CATCATTGAT CATGATGACA GCTTGGGTAT CACGAAAGTC  
 301 GCAGAACCAA TCGGTATTGT CGCGGCAATT GTCCCGACCA CTAATCCGAC CAGCACCGCG  
 361 ATCTTCAAGA GCTTGATCAG CCTGAAAACC CGCAACGCGA TTTTCTTCAG CCCGCACCCG  
 421 CGTGCGAAGA AGAGCACCAT CGCAGCGGCG ACCCTGATTT TGGATGCCGC GGTTAAGGCC  
 481 GGTGCACCGA AAAACATTAT TGGCTGGATT GACGAGCCGA GCATTGAGCT GTCTCAGGAC  
 541 CTGATGAGCG AAGCGGACAT TATTCTGGCC ACCGGTGGTC CGTCTATGGT TAAGGCAGCG  
 601 TACTCCAGCG GTAAGCCTGC TATCGGCGTT GGTGCGGGCA ATACGCCGGC TATCATCGAT  
 661 GAAAGCGCGG ATATTGATAT GGCAGTTAGC TCCATCATTC TGTCCAAAAC CTACGACAAT  
 721 GGTGTTATCT GTGCAAGCGA GCAAAGCATC CTGGTGATGA ATAGCATTTA CGAGAAGGTC  
 781 AAAGAAGAGT TTGTTAAGCG TGGTTCCTAT ATTCTGAACC AGAACGAGAT TGCAAAAATC  
 841 AAAGAAACGA TGTTAAGAA TGGCGCGATT AATGCAGATA TTGTTGGTAA GTCCGCATAC  
 901 ATTATCGCGA AGATGGCGGG TATCGAAGTG CCGCAAACCA CCAAAATCTT GATCGGCGAA  
 961 GTGCAGAGCG TGGAGAAGAG CGAACTGTTC AGCCATGAGA AACTGAGCCC GGTTCCTGGCT  
 1021 ATGTACAAAG TGAAGGACTT TGACGAAGCC CTGAAGCTGG CTCAGCGTCT GATTGAGCTG  
 1081 GGCGGCAGCG GTCACACGAG CAGCCTGTAT ATCGATAGCC AAAACAATAA GGACAAGGTG  
 1141 AAAGAGTTCG GTCTGGCGAT GAAAACCTCT CGCACGTTTA TCAACATGCC GAGCAGCCAA  
 1201 GGTGCGAGCG GCGATCTGTA TAACTTCGCA ATCGCGCCTT CTTTTACGCT GGGTTGCGGT

1261 ACCTGGGGCG GTAATTCGGT GAGCCAGAAT GTCGAGCCGA AGCACCTGCT GAACATCAAA  
1321 TCGGTTCGCG AGCGCCGTGA GAAGAGACCG TGGTTCAAAG TCCCACAGAA AATTTACTTC  
1381 AAATACGGCT GCCTGCGTTT CGCGCTGAAA GAACTGAAAG ACATGAACAA AAAGCGTGCG  
1441 TTCATTGTTA CCGACAAAGA CCTGTTCAA CTGGGTTACG TGAACAAAAT CACCAAAGTT  
1501 CTGGATGAAA TTGACATCAA GTACTCCATC TTCACTGATA TCAAATCCGA CCAAACGATT  
1561 GATAGCGTGA AAAAGGGCGC TAAAGAAATG CTGAACTTTG AACCGGACAC CATCATCAGC  
1621 ATCGGTGGTG GCTCTCCTAT GGATGCTGCG AAGGTCATGC ACCTGCTGTA CGAATACCCG  
1681 GAAGCGGAAA TCGAAAACCT GGCTATCAAC TTCATGGACA TCCGCAAACG TATCTGCAAC  
1741 TTCCCGAAGC TGGGCACTAA AGCTATTTCC GTTGCCATCC CGACTACCGC GGGCACTGGT  
1801 TCCGAAGCCA CGCCGTTTCG CGTGATCACC AACGATGAAA CCGGTATGAA ATACCCGCTG  
1861 ACCTCTTACG AACTGACCCC GAACATGGCA ATTATCGACA CCGAGCTGAT GCTGAACATG  
1921 CCGCGCAAGC TGACCGCTGC TACCGGCATC GACGCTCTGG TACATGCTAT TGAGGCGTAC  
1981 GTTTCCGTGA TGGTACCGA TTACACCGAC GAACTGGCCC TCGGTGCGAT CAAAATGATT  
2041 TTCAAGTACC TGCTCGCGC TTACAAAAAC GGCACGAATG ACATCGAGGC GCGTGAGAAA  
2101 ATGGCCCATG CAAGCAACAT CGCGGGCATG GCCTTCGCCA ACGCGTTCCT GGGCGTGTGC  
2161 CACTCTATGG CTCACAAACT GGGTGTATG CACCACGTGC CGCACGGTAT CGCGTGTGCT  
2221 TCCTGATCG AAGAAGTAAT TAAGTACAAC GCTACTGATT GCCCGACTAA ACAGACCGCC  
2281 TTCCACAGT ACAATCTCC TAACGCTAAA CGTAAGTACG CTGAGATCGC CGAATACCTG  
2341 AACCTGAAGG GTACGAGCGA CACTGAGAAA GTTACTGCGC TGATCGAAGC TATCTCTAAA  
2401 CTGAAAATTG ACCTGTCCAT CCCGCGAAGC ATCAGCGCCG CAGGCATCAA CAAAAGGAC  
2461 TTTTACAACA CGCTGGACAA AATGAGCGAA CTGGCTTTTG ACGACCAGTG CACCACTGCA  
2521 AACCCGCGTT ACCCGCTGAT CTCTGAGCTG AAAGACATTT ATATCAAATC TTTTTTAA

**AdhE2.26 (76955)**

1 ATGAAAGTGA CGAACCAAAA AGAACTGAAA CAAAACTGA ATGAACTGCG TGAGGCCAG  
61 AAAAAGTTCC TGACGATGAC CCAGGAGCAA GTTGACAAGA TCTTCAAACA GTGTGCCATT  
121 GCGGTGCGA AAGAGCGTAT TAACTTGGCC AAAGTGGCGG TGAAGAAAAC CGGCATCGGT  
181 CTGGTCGAGG ACAAGATTAT CAAGAATCAC TTTGCGCGG AGTATATCTA CAACAAATAC  
241 AAAAACGAAA AGACTTGCAG CATCATGAT CATGATGACA GCTTGGGTAT CACGAAAGTC  
301 GCAGAACCAA TCGGTATTGT CGCGGCAATT GTCCCGACCA CTAATCCGAC CAGCACCGCG  
361 ATCTTCAAGA GCTTGATCAG CCTGAAAACC CGCAACGCGA TTTTCTTCAG CCCGACCCG  
421 CGTGCGAAGA AGAGCACCAT CGCAGCGGCG AAGCTGATTT TGATGCGCG GGTAAAGGCC  
481 GGTGCACCGA AAAACATTAT TGGCTGGATT GACGAGCCGA GCATTGAGCT GTCTCAGGAC  
541 CTGATGAGCG AAGCGGACAT TATTCTGGCC ACCGGTGGTC CGTCTATGGT TAAGGCAGCG  
601 TACTCCAGCG GTAAGCCTGC TATCGCGGTT GGTGCGGGCA ATACGCCGCG TATCATCGAT  
661 GAAAGCGCGG ATATTGATAT GGCAGTTAGC TCCATCATTC TGTCCAAAAC CTACGACAAT  
721 GGTGTTATCT GTGCAAGCGA GCAAAGCATC CTGGTGATGA ATAGCATTTA CGAGAAGGTC  
781 AAAGAAGAGT TTGTTAAGCG TGGTTCCTAT ATTCTGAACC AGAACGAGAT TGCAAAAATC  
841 AAAGAAACGA TGTTAAGAA TGCGCGGATT AATGCAGATA TTGTTGGTAA GTCCGCATAC  
901 ATTATCGCGA AGATGGCGGG TATCGAAGTG CCGCAAACCA CAAAATCTT GATCGGCGAA  
961 GTGCAGAGCG TGGAGAAGAG CGAACTGTTG AGCATGAGA AACTGAGCCC GGTTCCTGGT  
1021 ATGTACAAAG TGAAGGACTT TGACGAAGCC CTGAAGAAAG CTCAGGCTCT GATTCACCTG  
1081 GCGGCGAGCG GTCACACGAG CAGCCTGTAT ATCGATAGCC AAAACAATAA GGACAAGGTG  
1141 AAAGAGTTCC GTCTGGCGAT GAAAACCTCT CGCACGTTTA TCAACATGCC GAGCAGCCAA  
1201 GGTGCGAGCG GCGATCTGTA TAACTTCGCA ATCGCGCCTT CTTTTACGCT GGGTTGCGGT  
1261 ACCTGGGGCG GTAATTCGGT GAGCCAGAAT GTCGAGCCGA AGCACCTGCT GAACATCAAA  
1321 TCGGTTCGCG AGCGCCGTGA GAAGAGACCG TGGTTCAAAG TCCCACAGAA AATTTACTTC  
1381 AAATACGGCT GCCTGCGTTT CGCGCTGAAA GAACTGAAAG ACATGAACAA AAAGCGTGCG  
1441 TTCATTGTTA CCGACAAAGA CCTGTTCAA CTGGGTTACG TGAACAAAAT CACCAAAGTT  
1501 CTGGATGAAA TTGACATCAA GTACTCCATC TTCACTGATA TCAAATCCGA CCAAACGATT  
1561 GATAGCGTGA AAAAGGGCGC TAAAGAAATG CTGAACTTTG AACCGGACAC CATCATCAGC  
1621 ATCGGTGGTG GCTCTCCTAT GGATGCTGCG AAGGTCATGC ACCTGCTGTA CGAATACCCG  
1681 GAAGCGGAAA TCGAAAACCT GGCTATCAAC TTCATGGACA TCCGCAAACG TATCTGCAAC  
1741 TTCCCGAAGC TGGGCACTAA AGCTATTTCC GTTGCCATCC CGACTACCGC GGGCACTGGT  
1801 TCCGAAGCCA CGCCGTTTCG CGTGATCACC AACGATGAAA CCGGTATGAA ATACCCGCTG  
1861 ACCTCTTACG AACTGACCCC GAACATGGCA ATTATCGACA CCGAGCTGAT GCTGAACATG  
1921 CCGCGCAAGC TGACCGCTGC TACCGGCATC GACGCTCTGG TACATGCTAT TGAGGCGTAC  
1981 GTTTCCGTGA TGGTACCGA TTACACCGAC GAACTGGCCC TCGGTGCGAT CAAAATGATT  
2041 TTCAAGTACC TGCTCGCGC TTACAAAAAC GGCACGAATG ACATCGAGGC GCGTGAGAAA  
2101 ATGGCCCATG CAAGCAACAT CGCGGGCATG GCCTTCGCCA ACGCGTTCCT GGGCGTGTGC  
2161 CACTCTATGG CTCACAAACT GGGTGTATG CACCACGTGC CGCACGGTAT CGCGTGTGCT  
2221 GTCTGATCG AAGAAGTAAT TAAGTACAAC GCTACTGATT GCCCGACTAA ACAGACCGCC

2281 TTCCACAGT ACAAATCTCC TAACGCTAAA CGTAAGTACG CTGAGATCGC CGAATACCTG  
2341 AACCTGAAGG GTACGAGCGA CACTGAGAAA GTTACTGCGC TGATCGAAGC TATCTCTAAA  
2401 CTGAAAATTG ACCTGTCCAT CCCGAGAAC ATCAGCGCCG CAGGCATCAA CAAAAAGGAC  
2461 TTTTACAACA CGCTGGACAA AATGAGCGAA CTGGCTTTTG ACGACCAGTG CACCATTGCA  
2521 AACCCGCGTT ACCCGCTGAT CTCTGAGCTG AAAGACATTT ATATCAAATC TTTTAA

**AdhE2.27 (76956)**

1 ATGAAAGTGA CGAACCAAAA AGAACTGAAA CAAAAACTGA ATGAACTGCG TGAGGCCAG  
61 AAAAAAGTTCG CTTGCTATAC CCAGGAGCAA GTTGAGAAGA TCTTCAAACA GTGTGCCATT  
121 GCGGCTGCCA AAGAGCGTAT TAACTTGGCC AAAGTGGCGG TGAAGAAAAC CGGCATCGGT  
181 CTGGTCGAGG ACAAGATTAT CAAGAATCAC TTTGCCGCGG AGTATATCTA CAACAAATAC  
241 AAAAAAGAAA AGACTTGCGG CATCATTGAT CATGATGACA GCTTGGGTAT CACGAAAGTC  
301 GCAGAACCAA TCGGTATTGT CGCGGCAATT GTCCCGACCA CTAATCCGAC CAGCACCCGG  
361 ATCTTCAAGA GCTTGATCAG CCTGAAAACC CGCAACGCGA TTTTCTTCAG CCCGCACCCG  
421 CGTGCGAAGA AGAGCACCAT CGCAGCGCGG AAGCTGATTT TGGATGCCGC GGTAAAGGCC  
481 GGTGCACCGA AAAACATTAT TGGCTGGATT GACGAGCCGA GCATTGAGCT GTCTCAGGAC  
541 CTGATGAGCG AAGCGGACAT TATTCTGGCC ACCGGTGGTC CGTCTATGGT TAAGGCAGCG  
601 TACTCCAGCG GTAAGCCTGC TATCGGCGTT GGTGCGGGCA ATACGCCGGC TATCATCGAT  
661 GAAAGCGCGG ATATTGATAT GGCAAGTATG TCCATCATTC TGTCAAAAAC CTACGACAAT  
721 GGTGTTATCT GTGCAAGCGA GCAAAGCATC CTGGTGATGA ATAGCATTTA CGAGAAGGTC  
781 AAAGAAGAGT TTGTTAAGCG TGTTTCTAT ATTCTGAACC AGAACGAGAT TGCAAAAATC  
841 AAAGAAACGA TGTTTAAGAA TGGCGCGATT AATGCAGATA TTGTTGGTAA GTCCGCATAC  
901 ATTATCGCGA AGATGGCGGG TATCGAAGTG CCGCAAACCA CCAAAATCTT GATCGGCGAA  
961 GTGCAGAGCG TGGAGAAGAG CGAACTGTTC AGCCATGAGA AACTGAGCCC GGTTCCTGGCT  
1021 ATGTACAAAG TGAAGACTT TGACGAAGCC CTGAAGAAAG CTCAGCGTCT GATTGAGCTG  
1081 GGCGCAGCC ACCACACGAG CAGCCTGTAT ATCGATAGCC AAAACAATAA GGACAAGGTG  
1141 AAAGAGTTCG GTCTGGCGAT GAAAACCTCT CGCACGTTTA TCAACATGCC GAGCAGCCAA  
1201 GGTGCGAGCG GCGATCTGTA TAACTTCGCA ATCGCGCCTT CTTTTACGCT GGGTTGCGGT  
1261 ACCTGGGGCG GTAATTGCGT GAGCCAGAAT GTCGAGCCGA AGCAGCTGCT GAACATCAAA  
1321 TCGGTGCGCG AGCGCCGTGA GAAGAGACCG TGGTTCAAAG TCCCACAGAA AATTTACTTC  
1381 AAATACGGCT GCCTGCGTTT CGCGCTGAAA GAACTGAAAG ACATGAACAA AAAGCGTGCG  
1441 TTCATGTGTA CCGACAAGA CCTGTTCAA CTGGGTTACG TGAACAAAAT CACCAAAGTT  
1501 CTGGATGAAA TTGACATCAA GTACTCCATC TTCACTGATA TCAAATCCGA CCCAACGATT  
1561 GATAGCGTGA AAAAGGGCGC TAAAGAAATG CTGAACTTTG AACCGGACAC CATCATCAGC  
1621 ATCGGTGGTG GCTCTCTAT GGATGCTGCG AAGGTCTGTC ACCTGCTGTA CGAATACCCG  
1681 GAAGCGGAAA TCGAAAACCT GGCTATCAAC TTCATGGACA TCCGCAAACG TATCTGCAAC  
1741 TTCCCGAAGC TGGGCACTAA AGCTATTTCC GTTGCCATCC CGACTACCGC GGGCACTGGT  
1801 TCCGAAGCCA CGCCGTTGCG CGTGATCACC AACGATGAAA CCGGTATGAA ATACCCGCTG  
1861 ACCTCTTACG AACTGACCCC GAACATGGCA ATTATCGACA CCGAGCTGAT GCTGAACATG  
1921 CCGCGCAAGC TGACCGCTGC TACCGGCATC GACGCTCTGG TACATGCTAT TGAGGCGTAC  
1981 GTTTCGCTGA TGGCTACCGA TTACACCGAC GAACTGGCCC TGCGTGCGAT CAAAATGATT  
2041 TTCAAGTACC TGCCCTGCGC TTACAAAAAC GGCACGAATG ACATCGAGGC GCGTGAGAAA  
2101 ATGGCCCATG CAAGCAACAT CGCGGGCATG GCCTTCGCCA ACGCGTTCCCT GGGCGTGTGC  
2161 CACTCTATGG CTCACAAACT GGGTGCTATG CACCACGTGC CGCACGGTAT CGCGTGTGCT  
2221 GTCCTGATCG AAGAAGTAAT TAAGTACAAC GCTACTGATT GCCCGACTAA ACAGACCGCC  
2281 TTCCACAGT ACAAATCTCC TAACGCTAAA CGTAAGTACG CTGAGATCGC CGAATACCTG  
2341 AACCTGAAGG GTACGAGCGA CACTGAGAAA GTTACTGCGC TGATCGAAGC TATCTCTAAA  
2401 CTGAAAATTG ACCTGTCCAT CCCGAGAAC ATCAGCGCCG CAGGCATCAA CAAAAAGGAC  
2461 TTTTACAACA CGCTGGACAA AATGAGCGAA CTGGCTTTTG ACGACCAGTG CACCATTGCA  
2521 AACCCGCGTT ACCCGCTGAT CTCTGAGCTG AAAGACATTT ATATCAAATC TTTTAA

**AdhE2.28 (76957)**

1 ATGAAAGTGA CGAACCAAAA AGAACTGAAA CAAAAACTGA ATGAACTGCG TGAGGCCAG  
61 AAAAAAGTTCG CTACGTGCAC CCAGGAGCAA GTTGACAAGA TCTTCAAACA GTGTGCCATT  
121 GCGGCTGCCA AAGAGCGTAT TAACTTGGCC AAAGTGGCGG TGAAGAAAAC CGGCATCGGT  
181 CTGGTCGAGG ACAAGATTAT CAAGAATCAC TTTGCCGCGG AGTATATCTA CAACAAATAC  
241 AAAAAAGAAA AGACTTGCGG CATCATTGAT CATGATGACA GCTTGGGTAT CACGAAAGTC  
301 GCAGAACCAA TCGGTATTGT CGCGGCAATT GTCCCGACCA CTAATCCGAC CAGCACCCGG  
361 ATCTTCAAGA GCTTGATCAG CCTGAAAACC CGCAACGCGA TTTTCTTCAG CCCGCACCCG  
421 CGTGCGAAGA AGAGCACCAT CGCAGCGCGG AAGCTGATTT TGGATGCCGC GGTAAAGGCC  
481 GGTGCACCGA AAAACATTAT TGGCTGGATT GACGAGCCGA GCATTGAGCT GTCTCAGGAC  
541 CTGATGAGCG AAGCGGACAT TATTCTGGCC ACCGGTGGTC CGTCTATGGT TAAGGCAGCG

|      |            |            |            |             |             |            |
|------|------------|------------|------------|-------------|-------------|------------|
| 601  | TACTCCAGCG | GTAAGCCTGC | TATCGGCGTT | GGTGCGGGCA  | ATACGCCGGC  | TATCATCGAT |
| 661  | GAAAGCGCGG | ATATTGATAT | GGCAGTTAGC | TCCATCATTC  | TGTCCAAAAC  | CTACGACAAT |
| 721  | GGTGTATCT  | GTGCAAGCGA | GCAAAGCATC | CTGGTGATGA  | ATAGCATTTA  | CGAGAAGGTG |
| 781  | AAAGAAGAGT | TTGTTAAGCG | TGGTTCCTAT | ATTCTGAACC  | AGAACGAGAT  | TGCAAAAATC |
| 841  | AAAGAAACGA | TGTTTAAGAA | TGGCGCGATT | AATGCAGATA  | TTGTTGGTAA  | GTCCGCATAC |
| 901  | ATTATCGCGA | AGATGGCGGG | TATCGAAGTG | CCGCAAATTCA | CCAAAATCTT  | GATCGGCGAA |
| 961  | GTGCAGAGCG | TGGAGAAGAG | CGAACTGTTC | AGCCATGAGA  | AACTGAGCCC  | GGTTCTGGCT |
| 1021 | ATGTACAAAG | TGAAGGACTT | TGACGAAGCC | CTGAAGAAAG  | CTCAGCGTCT  | GATTGAGCTG |
| 1081 | GGCGGCAGCG | GTACACAGAG | CAGCCTGTAT | ATCGATAGCC  | AAAACAATAA  | GGACAAGGTG |
| 1141 | AAAGAGTTCG | GTCTGGCGAT | GAAAACCTCT | CGCACGTTTA  | TCAACATGCC  | GAGCAGCCAA |
| 1201 | GGTCGAGGCG | CGGATCTGTA | TAACCTCGCA | ATCGCGCCTT  | CTTTTACGCT  | GGCGTGCGGT |
| 1261 | ACCTGGGGCG | GTAATTCGGT | GAGCCAGAAT | GTCGAGCCGA  | AGCACCTGCT  | GAACATCAAA |
| 1321 | TCGGTTCGCG | AGCGCCGTGA | GAAGAGACCG | TGGTTCAAAG  | TCCCACAGAA  | AATTTACTTC |
| 1381 | AAATACGGCT | GCCTGCGTTT | CGCGCTGAAA | GAAGTAAAAG  | ACATGAACAA  | AAAGCGTGCG |
| 1441 | TTCATTGTTA | CCGACAAAGA | CCTGTTCAAA | CTGGGTTACG  | TGAACAAAAT  | CACCAAAGTT |
| 1501 | CTGGATGAAA | TTGACATCAA | GTACTCCATC | TTCACTGATA  | TCAAATCCGA  | CCCAACGATT |
| 1561 | GATAGCGTGA | AAAAGGGCGC | TAAAGAAATG | CTGAACCTTG  | AACCGGACAC  | CATCATCAGC |
| 1621 | ATCGGTGGTG | GCTCTCCTAT | GGATGCTGCG | AAGGTCTATG  | ACCTGCTGTA  | CGAATACCCG |
| 1681 | GAAGCGGAAA | TCGAAAACCT | GGCTATCAAC | TTCATGGACA  | TCCGCAAACG  | TATCTGCAAC |
| 1741 | TTCCCGAAGC | TGGGCACTAA | AGCTATTTCC | GTTGCCATCC  | CGACTACCGC  | GGGCACTGGT |
| 1801 | TCCGAAGCCA | CGCCGTTCCG | CGTGATCACC | AACGATGAAA  | CCGGTATGAA  | ATACCCGCTG |
| 1861 | ACCTCTTACG | AACTGACCCC | GAACATGGCA | ATTATCGACA  | CCGAGCTGAT  | GCTGAACATG |
| 1921 | CCGCGCAAGC | TGACCGCTGC | TACCGGCATC | GACGCTCTGG  | TACATGCTAT  | TGAGGCGTAC |
| 1981 | CTTCCCGTGA | TGGCTACCGA | TTACACCGAC | GAAGTGGCCC  | TGCGTGCATG  | CAAAATGATT |
| 2041 | TTCAAGTACC | TGCTCGCGC  | TTACAAAAC  | GGCACGAATG  | ACATCGAGGC  | GCGTGAGAAA |
| 2101 | ATGGCCCATG | CAAGCAACAT | CGCGGGCATG | GCCTTCGCCA  | ACGCGTTCCCT | GGGCGTGTGC |
| 2161 | CACTCTATGG | CTCACAAACT | GGGTGCTATG | CACCACGTGC  | CGCACGGTAT  | CGCGTGTGCT |
| 2221 | GTCCCTGATC | AAGAAGTAAT | TAAGTACAAC | GCTACTGATT  | GCCCAGCTAA  | ACAGACCCGC |
| 2281 | TTCCCACAGT | ACAAATCTCC | TAACGCTAAA | CGTAAGTACG  | CTGAGATCGC  | CGAATACCTG |
| 2341 | AACCTGAAGG | GTACGAGCGA | CACTGAGAAA | GTTACTGCGC  | TGATCGAAGC  | TATCTCTAAA |
| 2401 | CTGAAAATTT | ACCTGTCCAT | CCCGCAGAAC | ATCAGCCCGC  | CAGGCATCAA  | CAAAAAGGAC |
| 2461 | TTTTACAACA | CGCTGGACAA | AATGAGCGAA | CTGGCTTTTG  | ACGACCAGTG  | CACCAATGCA |
| 2521 | AACCCGCGTT | ACCCGCTGAT | CTCTGAGCTG | AAAGACATTT  | ATATCAAATC  | TTTTTAA    |

**AdhE2.29 (76958)**

|      |             |             |             |             |            |             |
|------|-------------|-------------|-------------|-------------|------------|-------------|
| 1    | ATGAAAGTGA  | CGAACC AAAA | AGAAGT GAAA | CAAAA ACTGA | ATGAACTGCG | TGAGGCCCAG  |
| 61   | AAAAAGTTCG  | CTACGTATAC  | CCAGGAGCAA  | GTTGACAAGA  | TCTTCAAACA | GTGTGCCATT  |
| 121  | GCGGCTGCCA  | AAGAGCGTAT  | TAAC TTGGCC | AAACTGGCGG  | TGGAAGAAAC | CGGCATCGGT  |
| 181  | CTGGTCGAGG  | ACAAGATTAT  | CAAGAATCAC  | TTTGCCGCGG  | AGTATATCTA | CAACAAATAC  |
| 241  | AAAAACCACA  | AGACTTGCGG  | CATCATTGAT  | CATGATGACA  | GCTTGGGTAT | CACGAAAGTC  |
| 301  | GCAGAACCAA  | TCGGTATTGT  | CGCGGCAATT  | GTCCCGACCA  | CTAATCCGAC | CAGCACC GCG |
| 361  | ATCTTCAAAG  | GCTTGATCAG  | CCTGAAAACC  | CGCAACGCGA  | TTTTCTTCAG | CCCGCACCCG  |
| 421  | CGTGC GAAGA | AGAGCACCAT  | CGCAGCGGCG  | AAGCTGATTT  | TGGATGCCGC | GGTTAAGGCC  |
| 481  | GGTGCACCGA  | AAAACATTAT  | TGGCTGGATT  | GACGAGCCGA  | GCATTGAGCT | GTCTCAGGAC  |
| 541  | CTGATGAGCG  | AACCGGACAT  | TATTCTGGCC  | ACCGGTGGTC  | CGTCTATGGT | TAAGGCAGCG  |
| 601  | TACTCCAGCG  | GTAAGCCTGC  | TATCGGCGTT  | GGTGCGGGCA  | ATACGCCGGC | TATCATCGAT  |
| 661  | GAAAGCGCGG  | ATATTGATAT  | GGCAGTTAGC  | TCCATCATTC  | TGTCCAAAAC | CTACGACAAT  |
| 721  | GGTGTATCT   | GTGCAAGCGA  | GCAAAGCATC  | CTGGTGATGA  | ATAGCATTTA | CGAGAAGGTG  |
| 781  | AAAGAAGAGT  | TTGTTAAGCG  | TGGTTCCTAT  | ATTCTGAACC  | AGAACGAGAT | TGCAAAAATC  |
| 841  | AAAGAAACGA  | TGTTTAAGAA  | TGGCGCGATT  | AATGCAGATA  | TTGTTGGTAA | GTCCGCATAC  |
| 901  | ATTATCGCGA  | AGATGGCGGG  | TATCGAAGTG  | CCGCAAACCA  | CCAAAATCTT | GATCGGCGAA  |
| 961  | GTGCAGAGCG  | TGGAGAAGAG  | CGAACTGTTC  | AGCCATGAGA  | AACTGAGCCC | GGTTCTGGCT  |
| 1021 | ATGTACAAAG  | TGAAGGACTT  | TGACGAAGCC  | CTGAAGAAAG  | CTCAGCGTCT | GATTAACCTG  |
| 1081 | GGCGGCAGCG  | GTACACAGAG  | CAGCCTGTAT  | ATCGATAGCC  | AAAACAATAA | GGACAAGGTG  |
| 1141 | AAAGAGTTCG  | GTCTGGCGAT  | GAAAACCTCT  | CGCACGTTTA  | TCAACATGCC | GAGCAGCCAA  |
| 1201 | GGTGCAGGCG  | GCGATCTGTA  | TAAC TTGCGA | ATCGCGCCTT  | CTTTTACGCT | GGGTTGCGGT  |
| 1261 | ACCTGGGGCG  | GTAATTCGGT  | GAGCCAGAAT  | GTCGAGCCGA  | AGCACCTGCT | GAACATCAAA  |
| 1321 | TCGGTTCGCG  | AGCGCCGTGA  | GAAGAGACCG  | TGGTTCAAAG  | TCCCACAGAA | AATTTACTTC  |
| 1381 | AAATACGGCT  | GCCTGCGTTT  | CGCGCTGAAA  | GAAGTAAAAG  | ACATGAACAA | AAAGCGTGCG  |
| 1441 | TTCATTGTTA  | CCGACAAAGA  | CCTGTTCAAA  | CTGGGTTACG  | TGAACAAAAT | CACCAAAGTT  |
| 1501 | CTGGATGAAA  | TTGACATCAA  | GTACTCCATC  | TTCACTGATA  | TCAAATCCGA | CCCAACGATT  |
| 1561 | GATAGCGTGA  | AAAAGGGCGC  | TAAAGAAATG  | CTGAACCTTG  | AACCGGACAC | CATCATCAGC  |

|      |             |            |            |            |            |            |
|------|-------------|------------|------------|------------|------------|------------|
| 1621 | ATCGGTGGTG  | GCTCTCCTAT | GGATGCTGCG | AAGGTCATGC | ACCTGCTGTA | CGAATACCCG |
| 1681 | GAAGCGGAAA  | TCGAAAACCT | GGCTATCAAC | TTCATGGACA | TCCGCAAACG | TATCTGCAAC |
| 1741 | TTCCCGAAGC  | TGGGCACTAA | AGCTATTTCC | GTTGCCATCC | CGACTACCGC | GGGCACTGGT |
| 1801 | TCCGAAGCCA  | CGCCGTTCCG | CGTGATCACC | AACGATGAAA | CCGGTATGAA | ATACCCCGTG |
| 1861 | ACCTCTTACG  | AACAGACCCC | GAACATGGCA | ATTATCGACA | CCGAGCTGAT | GCTGAACATG |
| 1921 | CCGCGCAAGC  | TGACCGCTGC | TACCGGCATC | GACGCTCTGG | TACATGCTAT | TGAGGCGTAC |
| 1981 | GTTTCCGTGA  | TGGCTACCGA | TTACACCGAC | GAAGTGGCCC | TGCGTGCGAT | CAAAATGATT |
| 2041 | TTCAAGTACC  | TGCCTCGCGC | TTACAAAAAC | GGCACGAATG | ACATCGAGGC | GCGTGAGAAA |
| 2101 | ATGGCCCATG  | CAAGCAACAT | CGCGGGCATG | GCCTTCGCCA | ACGCGTTCCT | GGGCGTGTGC |
| 2161 | CACTCTATGG  | CTCACAAACT | GGGTGCTATG | CACCACGTGC | CGCACGGTAT | CGCGTGTGCT |
| 2221 | GCTCTATCG   | ACAAGTAAT  | TAAGTACAAC | GCTACTGATT | GCCCGACTAA | ACAGACCCGC |
| 2281 | TTCCACAGT   | ACAAATCTCC | TAACGCTAAA | CGTAAGTACG | CTGAGATCGC | CGAATACCTG |
| 2341 | AACCTGAAGG  | GTACGAGCGA | CACTGAGAAA | GTTACTGCGC | TGATCGAAGC | TATCTCTAAA |
| 2401 | CTGAAAATTG  | ACCTGTCCAT | CCCGCAGAAC | ATCAGCGCCG | CAGGCATCAA | CAAAAAGGAC |
| 2461 | TTTTTACAACA | CGCTGGACAA | AATGAGCGAA | CTGGCTTTTG | ACGACCAGTG | CACCACTGCA |
| 2521 | AACCCGCGTT  | ACCCGCTGAT | CTCTGAGCTG | AAAGACATTT | ATATCAAATC | TTTTTTAA   |

**AdhE2.30 (76959)**

|      |             |            |            |            |             |            |
|------|-------------|------------|------------|------------|-------------|------------|
| 1    | ATGAAAGTGA  | CGAACCAAAA | AGAAGTAAAA | CAAAAAGTGA | ATGAACTGCG  | TGAGGCCAG  |
| 61   | AAAAAGTTCG  | CTTGCTATAC | CCAGGAGCAA | GTTGACAAGA | TCTTCAAACA  | GTGTGCCATT |
| 121  | GCGGTCGCCA  | AAGAGCGTAT | TAAGTGGCCG | AAAGTGGCCG | TGGAAGAAAAC | CGGCACTGGT |
| 181  | CTGGTCGAGG  | ACAAGATTAT | CAAGAATCAC | TTTGCCGCGG | AGTATATCTA  | CAACAAGAGG |
| 241  | AAAAACGAAA  | AGACTTGCGG | CATCATTGAT | CATGATGACA | GCTTGGGTAT  | CACGAAAGTC |
| 301  | GCAGAACCAA  | TCGGTATTGT | CGCGGCAATT | GTCCCGACCA | CTAATCCGAC  | CAGCACCGCG |
| 361  | ATCTTCAAGA  | GCTTGATCAG | CCTGAAAACC | CGCAACGCGA | TTTTCTTCAG  | CCCGCACCCG |
| 421  | CGTGCGAAGA  | AGAGCACCAT | CGCAGCGGCG | AAGCTGATTT | TGGATGCCCG  | GGTTAAGGCC |
| 481  | GGTGACCCGA  | AAAACATTAT | TGGCTGGATT | GACGAGCCGA | GCATTGAGCT  | GTCTCAGGAC |
| 541  | ATGATGAGCG  | AAGCGGACAT | TATTCTGGCC | ACCGGTGGTC | CGTCTATGGT  | TAAGGCAGCG |
| 601  | TACTCCAGCG  | GTAAGCCTGC | TATCGGCGTT | GGTGCGGGCA | ATACGCCGGC  | TATCATCGAT |
| 661  | GAAAGCGCGG  | ATATTGATAT | GGCAGTTAGC | TCCATCATTC | TGTCCAAAAC  | CTACGACAAT |
| 721  | GGTGTATCT   | GTGCAAGCGA | GCAAAGCATC | CTGGTGATGA | ATAGCATTTA  | CGAGAAGGTC |
| 781  | AAAGAGAGT   | TTGTTAAGCG | TGGTTCCTAT | ATTCTGAACC | AGAACGAGAT  | TGCAAAAATC |
| 841  | AAAGAAACGA  | TGTTTAAGAA | TGGCGCGATT | AATGCAGATA | TTGTTGGTAA  | GTCCGCATAC |
| 901  | ATTATCGCGA  | AGATGGCGGG | TATCGAAGTG | CCGCAAACCA | CCAAAATCTT  | GATCGGCGAA |
| 961  | GTGCAGAGCG  | TGGAGAAGAG | CGAAGTGTTC | AGCCATGAGA | AACTGAGCCC  | GGTTCCTGGT |
| 1021 | ATGTACAAAG  | TGAAGGACTT | TGACGAAGCC | CTGAAGAAAG | CTCAGCGTCT  | GATTGAGCTG |
| 1081 | GGCGGCAGCG  | GTCACACGAG | CAGCCTGTAT | ATCGATAGCC | AAAACAATAA  | GGACAAGGTG |
| 1141 | AAAGAGTTCG  | GTCTGGCGAT | GAAAACCTCT | CGCACGTTTA | TCAACATGCC  | GAGCAGCCAA |
| 1201 | GGTGCAGAGC  | GCGATCTGTA | TAAGTTCGCA | ATCGCGCCTT | CTTTTACGCT  | GGGTTGCGGT |
| 1261 | ACCTGGGGCG  | GTAATTCGGT | GAGCCAGAAT | GTCGAGCCGA | AGCACCTGCT  | GAACATCAAA |
| 1321 | TCGGTTCGCG  | AGCGCCGTGA | GAAGAGACCG | TGGTTCAAAG | TCCCACAGAA  | AAATTTACTC |
| 1381 | AAATACGGCT  | GCCTGCGTTT | CGCGCTGAAA | GAAGTGAAG  | ACATGAACAA  | AAAGCGTGGC |
| 1441 | TTCAATTGTTA | CCGACAAAAG | CCTGTTCAAA | CTGGGTTACG | TGAACAAAAT  | CACCAAAGTT |
| 1501 | CTGGATGAAA  | TTGACATCAA | GTACTCCATC | TTCATGATA  | TCAAATCCGA  | CCCAACGATT |
| 1561 | GATAGCGTGA  | AAAAGGGCGC | TAAAGAAATG | CTGAAGTTTG | AACCGGACAC  | CATCATCAGC |
| 1621 | ATCGGTGGTG  | GCTCTCCTAT | GGATGCTGCG | AAGGTCATGC | ACCTGCTGTA  | CGAATACCCG |
| 1681 | GAAGCGGAAA  | TCGAAAACCT | GGCTATCAAC | TTCATGGACA | TCCGCAAACG  | TATCTGCAAC |
| 1741 | TTCCCGAAGC  | TGGGCACTAA | AGCTATTTCC | GTTGCCATCC | CGACTACCGC  | GGGCACTGGT |
| 1801 | TCCGAAGCCA  | CGCCGTTCCG | CGTGATCACC | AACGATGAAA | CCGGTATGAA  | ATACCCCGTG |
| 1861 | ACCTCTTACG  | AACAGACCCC | GAACATGGCA | ATTATCGACA | CCGAGCTGAT  | GCTGAACATG |
| 1921 | CCGCGCAAGC  | TGACCGCTGC | TACCGGCATC | GACGCTCTGG | TACATGCTAT  | TGAGGCGTAC |
| 1981 | GTTTCCGTGA  | TGGCTACCGA | TTACACCGAC | GAAGTGGCCC | TGCGTGCGAT  | CAAAATGATT |
| 2041 | TTCAAGTACC  | TGCCTCGCGC | TTACAAAAAC | GGCACGAATG | ACATCGAGGC  | GCGTGAGAAA |
| 2101 | ATGGCCCATG  | CAAGCAACAT | CGCGGGCATG | GCCTTCGCCA | ACGCGTTCCT  | GGGCGTGTGC |
| 2161 | CACCTATGG   | CTCACAAACT | GGGTGCTATG | CACCACGTGC | CGCACGGTAT  | CGCGTGTGCT |
| 2221 | GTCCTGATCG  | AAGAAGTAAT | TAAGTACAAC | GCTACTGATT | GCCCGACTAA  | ACAGACCCGC |
| 2281 | TTCCACAGT   | ACAAATCTCC | TAACGCTAAA | CGTAAGTACG | CTGAGATCGC  | CGAATACCTG |
| 2341 | AACCTGAAGG  | GTACGAGCGA | CACTGAGAAA | GTTACTGCGC | TGATCGAAGC  | TATCTCTAAA |
| 2401 | CTGAAAATTG  | ACCTGTCCAT | CCCGCAGAAC | ATCAGCGCCG | CAGGCATCAA  | CAAAAAGGAC |
| 2461 | TTTTTACAACA | CGCTGGACAA | AATGAGCGAA | CTGGCTTTTG | ACGACCAGTG  | CACCACTGCA |
| 2521 | AACCCGCGTT  | ACCCGCTGAT | CTCTGAGCTG | AAAGACATTT | ATATCAAATC  | TTTTTTAA   |



**AdhE2.31 (76960)**

```

1 ATGAAAGTGA CGAACCAAAA AGAACTGAAA CAAAAACTGA ATGAACTGCG TGAGGCCAG
61 AAAAAGTTCC TGACGTATAC CCAGGAGCAA GTTGACAAGA TCTTCAAACA GTGTGCCATT
121 GCGGCTGCCA AAGAGCGTAT TAACTTGGCC CGTCTGGCGG TGAAGAAAAC CGGCATCGGT
181 CTGGTCGAGG ACAAGATTAT CAAGAATCAC TTTGCCGCGG AGTATATCTA CAACAAATAC
241 AAAAACGAAA AGACTTGCGG CATCATTGAT CATGATGACA GCTTGGGTAT CACGAAAGTC
301 GCAGAACCAA TCGGTATTGT CGCGGCAATT GTCCCGACCA CTAATCCGAC CAGCACCCGG
361 ATCTTCAAGA GCTTGATCAG CCTGAAAACC CGCAACGCGA TTTTCTTCAG CCCGCACCCG
421 CGTGCGAAGA AGAGCACCAT CGCAGCGCGC AAGCTGATTT TGGATGCCGC GGTTAAGGCC
481 GGTGCACCGA AAAACATTAT TGGCTGGATT GACGAGCCGA GCATTGAGCT GTCTCAGGAC
541 CTGATGAGCG AAGCGGACAT TATTCTGGCC ACCGGTGGTC CGTCTATGGT TAAGGCAGCG
601 TACTCCAGCG GTAAGCCTGC TATCGGCGTT GGTGCGGGCA ATACGCCGGC TATCATCGAT
661 GAAAGCGCGG ATATTGATAT GGCAGTTAGC TCCATCATTC TGTCAAAAC CTACGACAAT
721 GGTGTTATCT GTGCAAGCGA GCAAAGCATC CTGGTGATGA ATAGCATTTA CGAGAAGGTC
781 AAAGAAAGAGT TTGTTAAGCG TGGTTCCTAT ATTCTGAACC AGGAGGAGAT TGCAAAAATC
841 AAAGAAACGA TGTTAAGAA TGGCGCGATT AATGCAGATA TTGTTGGTAA GTCCGCATAC
901 ATTATCGCGA AGATGGCGGG TATCGAAGTG CCGCAAACCA CCAAATCTT GATCGGCGAA
961 GTGCAGAGCG TGGAGAAGAG CGAACTGTTC AGCCATGAGA AACTGAGCCC GGTTCCTGGCT
1021 ATGTACAAAG TGAAGGACTT TGACGAAGCC CTGAAGAAAAG CTCAGCGTCT GATTGAGCTG
1081 GGCGCAGCG GTACACAGAG CAGCCTGTAT ATCGATAGCC AAAACAATAA GGACAAGGTG
1141 AAAGAGTTCC GTCTGGCGAT GAAAACCTCT CGCACGTTTA TCAACATGCC GAGCAGCCAA
1201 GGTGCGAGCG GCGATCTGTA TAACTTCGCA ATCGCGCCTT CTTTTACGCT GGGTTGCGGT
1261 ACCTGGGGCG GTAATTCGGT GAGCCAGAAT GTCGAGCCGA AGCACTGCT GAACATCAAA
1321 TCGGTCGCGG AGCGCCGTGA GAAGAGACCG TGGTTCAAAG TCCCACAGAA AATTTACTTC
1381 AAATACGGCT GCCTGCGTTT CGCGTGAAA GAACTGAAAG ACATGAACAA AAAGCGTGCG
1441 TTCATGTGTA CCGACAAAGA CCTGTTCAAA CTGGGTTACG TGAACAAAAT CACCAAAGTT
1501 CTGGATGAAA TTGACATCAA GTACTCCATC TTCACTGATA TCAAATCCGA CCCAACGATT
1561 GATAGCGTGA AAAAGGGCGC TAAAGAAATG CTGAACTTG AACCGGACAC CATCATCAGC
1621 ATCGGTGGTG GCTCTCCTAT GGATGCTGCG AAGGTCATGC ACCTGCTGTA CGAATACCCG
1681 GAAGCGGAAA TCGAAAACCT GGCTATCAAC TTCATGGACA TCCGCAAACG TATCTGCAAC
1741 TTCCCGAAGC TGGGCACTAA AGCTATTTCC GTTGCCATCC CGACTACCGC GGGCACTGGT
1801 TCCGAAGCCA CGCGTTCGCG CGTGATCACC AACGATGAAA CCGGTATGAA ATACCCGCTG
1861 ACCTTTACG AACTGACCCC GAACATGGCA ATTATCGACA CCGAGCTGAT GCTGAACATG
1921 CCGCGCAAGC TGACCGCTGC TACCGGCATC GACGCTCTGG TACATGCTAT TGAGGCGTAT
1981 GTTCCGTGTA TGGCTACCGA TTACACCGAC GAACTGGCCC TCGGTGCGAT CAAAATGATT
2041 TTCAAGTACC TGCCTCGCGC TTACAAAAAC GGCACGAATG ACATCGAGGC GCGTGAGAAA
2101 ATGGCCCATG CAAGCAACAT CGCGGGCATG GCCTTCGCCA ACGCGTTTCT GGGCGTGTGC
2161 CACTCTATGG CTCACAAACT GGGTGCTATG CACCACGTGC CGCACGGTAT CGCGTGTGCT
2221 GTCCTGATCG AAGAAGTAAT TAAGTACAAC GCTACTGATT GCCCGACTAA ACAGACCGCC
2281 TTCCCACAGT ACAAATCTCC TAACGCTAAA CGTAAGTACG CTGAGATCGC CGAATACCTG
2341 AACCTGAAGG GTACGAGCGA CACTGAGAAA GTTACTGCGC TGATCGAAGC TATCTCTAAT
2401 CTGAAAATG ACCTGTCCAT CCGCAGAAC ATCAGCGCCG CAGGCATCAA CAAAAAGGAC
2461 TTTTACAACA CGCTGGACAA AATGAGCGAA CTGGCTTTTG ACGACCAGTG CACCCTGCA
2521 AACCCGCGTT ACCCGCTGAT CTCTGAGCTG AAAGACATTT ATATCAAATC TTTTAA

```

**AdhE2.32 (76961)**

```

1 ATGAAAGTGA CGAACCAAAA AGAACTGAAA CAAAAACTGA ATGAACTGCG TGAGGCCAG
61 AAAAAGTTCC CTACGATGAC CCAGGAGCAA GTTGACAAGA TCTTCAAACA GTGTGCCATT
121 GCGGCTGCCA AAGAGCGTAT TAACTTGGCC AACTGGCGG TGAAGAAAAC CGGCATCGGT
181 CTGGTCGAGG ACAAGATTAT CAAGAATCAC TTTGCCGCGG AGTATATCTA CAACAAATAC
241 AAAAACGAAA AGACTTGCGG CATCATTGAT CATGATGACA GCTTGGGTAT CACGAAAGTC
301 GCAGAACCAA TCGGTATTGT CGCGGCAATT GTCCCGACCA CTAATCCGAC CAGCACCCGG
361 ATCTTCAAGA GCTTGATCAG CCTGAAAACC CGCAACGCGA TTTTCTTCAG CCCGCACCCG
421 CGTGCGAAGA AGAGCACCAT CGCAGCGCGC AAGCTGATTT TGGATGCCGC GGTTAAGGCC
481 GGTGCACCGA AAAACATTAT TGGCTGGATT GACGAGCCGA GCATTGAGCT GTCTCAGGAC
541 ATGATGAGCG AAGCGGACAT TATTCTGGCC ACCGGTGGTC CGTCTATGGT TAAGGCAGCG
601 TACTCCAGCG GTAAGCCTGC TATCGGCGTT GGTGCGGGCA ATACGCCGGC TATCATCGAT
661 GAAAGCGCGG ATATTGATAT GGCAGTTAGC TCCATCATTC TGTCAAAAC CTACGACAAT
721 GGTGTTATCT GTGCAAGCGA GCAAAGCATC CTGGTGATGA ATAGCATTTA CGAGAAGGTC
781 AAAGAAAGAGT TTGTTAAGCG TGGTTCCTAT ATTCTGAACC AGAACGAGAT TGCAAAAATC
841 AAAGAAACGA TGTTAAGAA TGGCGCGATT AATGCAGATA TTGTTGGTAA GTCCGCATAC
901 ATTATCGCGA AGATGGCGGG TATCGAAGTG CCGCAAACCA CCAAATCTT GATCGGCGAA

```

961 GTGCAGAGCG TGGAGAAGAG CGAACTGTTC AGCCATGAGA AACTGAGCCC GGTTCCTGGCT  
 1021 ATGTACAAAG TGAAGGACTT TGACGAAGCC CTGAAGAAAG CTCAGCGTCT GATTGAGCTG  
 1081 GGCGGCAGCG GTACACAGAG CAGCCTGTAT AGCGATAGCC AAAACAATAA GGACAAGGTG  
 1141 AAAGAGTTCC GTCTGGCGAT GAAAACCTCT CGCACGTTTA TCAACATGCC GAGCAGCCAA  
 1201 GGTGCGAGCG GCGATCTGTA TAACTTCGCA ATCGCGCCTT CTTTTACGCT GGGTTGCGGT  
 1261 ACCTGGGGCG GTAATTCGGT GAGCCAGAAT GTCGAGCCGA AGCACCTGCT GAACATCAAA  
 1321 TCGGTGCGGG AGCGCCGTGA GAAGAGACCG TGGTTCAAAG TCCCACAGAA AATTTACTTC  
 1381 AAATACGGCT GCCTGCGTTT CGCGCTGAAA GAACTGAAAG ACATGAACAA AAAGCGTGCG  
 1441 TTCATTGTTA CCGACAAAGA CCTGTTCAAA CTGGGTTACG TGAACAAAAT CACCAAAGTT  
 1501 CTGGATGAAA TTGACATCAA GTACTCCATC TTCACTGATA TCAAATCCGA CCCAACGATT  
 1561 GATAGCTGTA AAAAGGGCGC TAAAGAAATG CTGAACTTTG AACCGGACAC CATCATCAGC  
 1621 ATCGGTGGTG GCTCTCCTAT GGATGCTGCG AAGGTCATGC ACCTGCTGTA CGAATACCCG  
 1681 GAAGCGGAAA TCGAAAACCT GGCTATCAAC TTCATGGACA TCCGCAAACG TATCTGCAAC  
 1741 TTCCCGAAGC TGGGCACTAA AGCTATTTCC GTTGCCATCC CGACTACCGC GGGCACTGGT  
 1801 TCCGAAGCCA CGCCGTTCGC CGTGATCACC AACGATGAAA CCGGTATGAA ATACCCGCTG  
 1861 ACCTCTTACG AACTGACCCC GAACATGGCA ATTATCGACA CCGAGCTGAT GCTGAACATG  
 1921 CCGCGCAAGC TGACCGCTGC TACCGGCATC GACGCTCTGG TACATGCTAT TGAGGCGTAC  
 1981 GTTTCCTGTA TGGCTACCGA TTACACCGAC GAACTGGCCC TGCGTGCGAT CAAAATGATT  
 2041 TTCAAGTACC TGCCTCGCGC TTACAAAAAC GGCACGAATG ACATCGAGGC GCGTGAGAAA  
 2101 ATGGCCCATG CAAGCAACAT CGCGGGCATG GCCTTCGCCA ACGCGTTTCT GGGCGTGTGC  
 2161 CACTCTATGG CTCACAAACT GGGTGTATG CACCACGTGC CGCACGGTAT CGCGTGTGCT  
 2221 GTCCTGATCG AAGAAGTAAT TAAGTACAAC GCTACTGATT GCCCGACTAA ACAGACCGCC  
 2281 TTCCCACAGT ACAAATCTCC TAACGCTAAA CGTAAGTACG CTGAGATCGC CGAATACCTG  
 2341 AACCTGAAGC GTACGAGCGA CACTGAGAAA GTTACTGCGC TGATCGAAGC TATCTCTAAA  
 2401 CTGAAAATTG ACCTGTCCAT CCGCAGAAC ATCAGCGCCG CAGGCATCAA CAAAAGGAC  
 2461 TTTTACAACA CGCTGGACAA AATGAGCGAA CTGGCTTTTG ACGACCAGTG CACCCTGCA  
 2521 AACCCGCGTT ACCCGCTGAT CTCTGAGCTG AAAGACATTT ATATCAAATC TTTTAA

**AdhE2.33 (76962)**

1 ATGAAAGTGA CGAACCAAAA AGAACTGAAA CAAAAACTGA ATGAACTGCG TGAGGCCCGAG  
 61 AAAAAGTTCC CTACGTATAC CCAGGAGCAA GTTGACAAGA TCTTCAAACA GTGTGCCATT  
 121 GCGGTGCCA AAGAGCGTAT TAACTTGGCC AACTGGCGG TGAAGAAAC CGGCATCGGT  
 181 CTGGTCGAGG ACAAGATTAT CAAGAATCAC TTTGCCGCGG AGTATATCTA CAACAAATAC  
 241 AAAAACGAAA AGACTTGCGG CATCATTGAT CATGATGACA GCTTGGGTAT CACGAAAAGT  
 301 GCAGAACCAA TCGGTATTGT CGCGAGCATT GTCCCGACCA CTAATCCGAC CAGCAACCGC  
 361 ATCTTCAAGA GCTTGATCAG CCTGAAAACC CGCAACGCGA TTTTCTTCAG CCCGCACCCG  
 421 CGTGCGAAGA AGAGCACCAT CGCAGCGGCG AAGCTGATTT TGGATGCCCG GGTAAAGGCC  
 481 GGTGCACCGA AAAACATTAT TGGCTGGATT GACGAGCCGA GCATTGAGCT GTCTCAGGAC  
 541 CTGATGAGCG AAGCGGACAT TATCTTGCC ACCGGTGGTC CGTCTATGGT TAAGGCAGCG  
 601 TACTCCAGCG GTAAGCCTGC TATCGGCGTT GGTGCGGGCA ATACGCCGGC TATCATCGAT  
 661 GAAAGCGCG ATATTGATAT GGCAGTTAGC TCCATCATT TGTCCAAAAC CTACGACAAT  
 721 GGTGTTATCT GTGCAAGCGA GCAAAGCATC CTGGTGATGA ATAGCATTTA CGAGAAGGTC  
 781 AAAGAAGAGT TTGTAAAGCG TGGTTCTTAT ATTCTGAACC AGAACGAGAT TGCAAAAATC  
 841 AAAGAAACGA TGTTAAAGAA TGGCGCGATT AATGCAGATA TTGTTGGTAA GTCCGCATAC  
 901 ATTATCGCGA AGATGGCGGG TATCGAAGTG CCGCAATTCA CCAAATCTT GATCGGCGAA  
 961 GTGCAGAGCG TGGAGAAGAG CGAACTGTTC AGCCATGAGA AACTGAGCCC GGTTCCTGGCT  
 1021 ATGTACAAAG TGAAGGACTT TGACGAAGCC CTGAAGAAAG CTCAGCGTCT GATTGAGCTG  
 1081 GGCGGCAGCG GTACACAGAG CAGCCTGTAT AGCGATAGCC AAAACAATAA GGACAAGGTG  
 1141 AAAGAGTTCC GTCTGGCGAT GAAAACCTCT CGCACGTTTA TCAACATGCC GAGCAGCCAA  
 1201 GGTGCGAGCG GCGATCTGTA TAACTTCGCA ATCGCGCCTT CTTTTACGCT GGGTTGCGGT  
 1261 ACCTGGGGCG GTAATTCGGT GAGCCAGAAT GTCGAGCCGA AGCACCTGCT GAACATCAAA  
 1321 TCGGTGCGGG AGCGCCGTGA GAAGAGACCG TGGTTCAAAG TCCCACAGAA AATTTACTTC  
 1381 AAATACGGCT GCCTGCGTTT CGCGCTGAAA GAACTGAAAG ACATGAACAA AAAGCGTGCG  
 1441 TTCATTGTTA CCGACAAAGA CCTGTTCAAA CTGGGTTACG TGAACAAAAT CACCAAAGTT  
 1501 CTGGATGAAA TTGACATCAA GTACTCCATC TTCACTGATA TCAAATCCGA CCCAACGATT  
 1561 GATAGCTGTA AAAAGGGCGC TAAAGAAATG CTGAACTTTG AACCGGACAC CATCATCAGC  
 1621 ATCGGTGGTG GCTCTCCTAT GGATGCTGCG AAGGTCATGC ACCTGCTGTA CGAATACCCG  
 1681 GAAGCGGAAA TCGAAAACCT GGCTATCAAC TTCATGGACA TCCGCAAACG TATCTGCAAC  
 1741 TTCCCGAAGC TGGGCACTAA AGCTATTTCC GTTGCCATCC CGACTACCGC GGGCACTGGT  
 1801 TCCGAAGCCA CGCCGTTCGC CGTGATCACC AACGATGAAA CCGGTATGAA ATACCCGCTG  
 1861 ACCTCTTACG AACTGACCCC GAACATGGCA ATTATCGACA CCGAGCTGAT GCTGAACATG  
 1921 CCGCGCAAGC TGACCGCTGC TACCGGCATC GACGCTCTGG TACATGCTAT TGAGGCGTAC

|      |             |            |            |            |            |            |
|------|-------------|------------|------------|------------|------------|------------|
| 1981 | TTTTCCGTGA  | TGGCTACCGA | TTACACCGAC | GAACTGGCCC | TGCGTGCAT  | CAAAATGATT |
| 2041 | TTCAAGTACC  | TGCCTCGCGC | TTACAAAAAC | GGCACGAATG | ACATCGAGGC | GCGTGAGAAA |
| 2101 | ATGGCCCATG  | CAAGCAACAT | CGCGGGCATG | GCCTTCGCCA | ACGCGTTCCT | GGGCGTGTGC |
| 2161 | CACTCTATGG  | CTCACAAACT | GGGTGCTATG | CACCACGTGC | CGCACGGTAT | CGCGTGTGCT |
| 2221 | GTCCTGATCG  | AAGAAGTAAT | TAAGTACAAC | GCTACTGATT | GCCCCACTAA | ACAGACCGCC |
| 2281 | TTCCACAGT   | ACAAATCTCC | TAACGCTAAA | CGTAAGTACG | CTGAGATCGC | CGAATACCTG |
| 2341 | AACCTGAAGG  | GTACGAGCGA | CACTGAGAAA | GTTACTGCGC | TGATCGAAGC | TATCTCTAAA |
| 2401 | CTGAAAATTG  | ACCTGTCCAT | CCCGCAGAAC | ATCAGCGCCG | CAGGCATCAA | CAAAAAGGAC |
| 2461 | TTTTTACAACA | CGCTGGACAA | AATGAGCGAA | CTGGCTTTTG | ACGACCAGTG | CACCACTGCA |
| 2521 | AACCCGCGTT  | ACCCGCTGAT | CTCTGAGCTG | AAAGACATTT | ATATCAAATC | TTTTTAA    |

**AdhE2.34 (76963)**

|      |             |            |             |             |            |             |
|------|-------------|------------|-------------|-------------|------------|-------------|
| 1    | ATGAAAGTGA  | CGAACCAAAA | AGAACTGAAA  | CAAAAACCTGA | ATGAACTGCG | TGAGGCCAG   |
| 61   | AAAAAGTTCG  | CTACGTATAC | CCAGGAGCAA  | GTTGACAAGA  | TCTTCAAACA | GTGTGCCATT  |
| 121  | GCGGTCGCCA  | AAGAGCGTAT | TAACCTGGCC  | AAACTGGCGG  | TGGAAGAAAC | CGGCATCGGT  |
| 181  | CTGGTCGAGG  | ACAAGATTAT | CAAGAATCAC  | TTTGCCGCGG  | AGTATATCTA | CAACAAATAC  |
| 241  | AAAAACGAAA  | AGACTTGCGG | CATCATTGAT  | CATGATGACA  | GCTTGGGTAT | CACGAAAGTC  |
| 301  | GCAGAACCAA  | TCGGTATTGT | CGCGCAATT   | GTCCCGACCA  | CTAATCCGAC | CAGCACCAGG  |
| 361  | ATCTTCAAGA  | GCCTGATCAG | CCTGAAAACC  | CGCAACGCGA  | TTTTCTTCAG | CCCGCACCCG  |
| 421  | CGTGCGAAGA  | AGAGCACCAT | CGCAGCGGCG  | AAGCTGATTT  | TGGATGCCGC | GGTTAAGGCC  |
| 481  | GGTGCCACGA  | AAAACATTAT | TGGCTGGATT  | GACGAGCCGA  | GCATTGAGCT | GTCTCAGGAC  |
| 541  | CTGATGAGCG  | AAGCGGACAT | TATCTGGCC   | ACCGTGAGTC  | CGTCTATGGT | TAAGGCAGCG  |
| 601  | TACTCCAGCG  | GTAAGCCTGC | TATCGGCGTT  | GGTGCGGGCA  | ATACGCCGGC | TATCATCGAT  |
| 661  | GAAAGCGCGG  | ATATTGATAT | GGCAGTTAGC  | TCCATCATTC  | TGTCCAAAAC | CTACGACAAT  |
| 721  | GGTGTATCT   | GTGCAAGCGA | GCAAAGCATC  | CTGGTGATGA  | ATAGCATTTA | CGAGAAGGTC  |
| 781  | AAAGAAAGAGT | TTGTTAAGCG | TGGTTCCCTAT | ATTCTGAACC  | AGAACGAGAT | TGCAAAAATC  |
| 841  | AAAGAAACGA  | TGTTAAGAA  | TGGCGCGATT  | AATGCAGATA  | TTGTTGGTAA | GTCCGCATAC  |
| 901  | ATTATCGCGA  | AGATGGCGGG | TATCGAAGTG  | CCGCAAACCA  | CCAAAATCTT | GATCGGGCGAA |
| 961  | TTGCGAGCG   | TGGAGAAGAG | CGAACTGTTT  | AGCGAGGAGA  | AACTGAGCCC | GGTCTGGCT   |
| 1021 | ATGTACAAAG  | TGAAGGACTT | TGACGAAGCC  | CTGAAGAAAG  | CTCAGCGTCT | GATTGAGCTG  |
| 1081 | GGCGGCAGCG  | GTCACACGAG | CAGCCTGTAT  | ATCGATAGCC  | AAAACAATAA | GGACAAGGTG  |
| 1141 | AAAGAGTTCG  | GTCTGGCGAT | GAAAACCTCT  | ATCACGTTTA  | TCAACATGCC | GAGCAGCCAA  |
| 1201 | GGTGCAGCG   | GCGATCTGTA | TAACCTCGCA  | ATCGCGCCTT  | CTTTTACGCT | GGGTTGCGGT  |
| 1261 | ACCTGGGGCG  | GTAATTCGGT | GAGCCAGAAT  | GTCGAGCCGA  | AGCACCTGCT | GAACATCGTT  |
| 1321 | TCGGTCGCGG  | AGCCCGTGA  | GAAGAGACCG  | TGGTTCAAAG  | TCCCACAGAA | AAATTTACTTC |
| 1381 | AAATACGGCT  | GCCTGCGTTT | CGCGCTGAAA  | GAACGTAAAG  | ACATGAACAA | AAAGCGTGCG  |
| 1441 | TTCATTGTTA  | CCGACAAAAG | CCTGTTCAAA  | CTGGGTTACG  | TGAACAAAAT | CACCAAAGTT  |
| 1501 | CTGGATGAAA  | TTGACATCAA | GTACTCCATC  | TTCATGATA   | TCAAATCCGA | CCCAACGATT  |
| 1561 | GATAGCGTGA  | AAAAGGGCGC | TAAAGAAATG  | CTGAACTTTG  | AACCGGACAC | CATCATCAGC  |
| 1621 | ATCGGTGGTG  | GCTCTCCTAT | GGATGCTGCG  | AAGGTCATGC  | ACCTGCTGTA | CGAATACCCG  |
| 1681 | GAAAGCGAAA  | TCGAAAACCT | GGTATCAACT  | TTCATGGACA  | TCCGAAAACG | TATCTGCAAC  |
| 1741 | TTCCGGAAG   | TGGGCACTAA | AGCTATTTCC  | GTGCGCATCC  | CGACTACCCG | GGGCACTGGT  |
| 1801 | TCCGAAGCCA  | CGCCGTTGCG | CGTGATCACC  | AACGATGAAA  | CCGGTATGAA | ATACCCGCTG  |
| 1861 | ACCTCTTACG  | AACTGACCCC | GAACATGGCA  | ATTATCGACA  | CCGAGCTGAT | GCTGAACATG  |
| 1921 | CCGCGCAAGC  | TGACCGCTGC | TACCGGCATC  | GACGCTCTGG  | TACATGCTAT | TGAGGCGTAC  |
| 1981 | TTTTCCGTGA  | TGGCTACCGA | TTACACCGAC  | GAACTGGCCC  | TGCGTGCAT  | CAAAATGATT  |
| 2041 | TTCAAGTACC  | TGCCTCGCGC | TTACAAAAAC  | GGCACGAATG  | ACATCGAGGC | GCGTGAGAAA  |
| 2101 | ATGGCCCATG  | CAAGCAACAT | CGCGGGCATG  | GCCTTCGCCA  | ACGCGTTCCT | GGGCGTGTGC  |
| 2161 | CACTCTATGG  | CTCACAAACT | GGGTGCTATG  | CACCACGTGC  | CGCACGGTAT | CGCGTGTGCT  |
| 2221 | GTCCTGATCG  | AAGAAGTAAT | TAAGTACAAC  | GCTACTGATT  | GCCCCACTAA | ACAGACCGCC  |
| 2281 | TTCCACAGT   | ACAAATCTCC | TAACGCTAAA  | CGTAAGTACG  | CTGAGATCGC | CGAATACCTG  |
| 2341 | AACCTGAAGG  | GTACGAGCGA | CACTGAGAAA  | GTTACTGCGC  | TGATCGAAGC | TATCTCTAAA  |
| 2401 | CTGAAAATTG  | ACCTGTCCAT | CCCGCAGAAC  | ATCAGCGCCG  | CAGGCATCAA | CAAAAAGGAC  |
| 2461 | TTTTTACAACA | CGCTGGACAA | AATGAGCGAA  | CTGGCTTTTG  | ACGACCAGTG | CACCACTGCA  |
| 2521 | AACCCGCGTT  | ACCCGCTGAT | CTCTGAGCTG  | AAAGACATTT  | ATATCAAATC | TTTTTAA     |

**AdhE2.35 (76964)**

|     |            |            |            |             |            |            |
|-----|------------|------------|------------|-------------|------------|------------|
| 1   | ATGAAAGTGA | CGAACCAAAA | AGAACTGAAA | CAAAAACCTGA | ATGAACTGCG | TGAGGCCAG  |
| 61  | AAAAAGTTCG | CTACGTATAC | CCAGGAGCAA | GTTGACAAGA  | TCTTCAAACA | GTGTGCCATT |
| 121 | GCGGTCGCCA | AAGAGCGTAT | TAACCTGGCC | AAACTGGCGG  | TGGAAGAAAC | CGGCATCGGT |
| 181 | CTGGTCGAGG | ACAAGATTAT | CAAGAATCAC | TTTGCCGCGG  | AGTATATCTA | CAACAAATAC |
| 241 | AAAAACGAAA | AGACTTGCGG | CATCATTGAT | CATGATGACA  | GCTTGGGTAT | CACGAAAGTC |

301 GCAGAACCAA TCGGTATTGT CGCGCAATT GTCCCGACCA CTAATCCGAC CAGCACC GCG  
361 ATCTTCAAGA GCTTGATCAG CCTGAAAACC CGCAACGCGA TTTTCTTCAG CCCGCACCCG  
421 CGTGCGAAGA AGAGCACCAT CGCAGCGGCG AAGCTGATTT TGGATGCCGC GGTAAAGGCC  
481 GGTGCACCGA AAAACATTAT TGGCTGGATT GACGAGCCGA GCATTGAGCT GTCTCAGGAC  
541 CTGATGAAAG AAGCGGACAT TATTCTGGCC ACCGGTGGTC CGTCTATGGT TAAGGCAGCG  
601 TACTCCAGCG GTAAGAAAGC TATCGGCGTT GGTGCGGGCA ATACGCCGGC TATCATCGAT  
661 GAAAGCGCGG ATATTGATAT GGCAGTTAGC TCCATCATTC TGTCCAAAAC CTACGACAAT  
721 GGTGTATCT GTGCAAGCGA GCAAAGCATC CTGGTGATGA ATAGCATTTA CGAGAAGGTC  
781 AAAGAAGAGT TTGTTAAGCG TGGTTCCTAT ATTCTGAACC AGAACGAGAT TGCAAAAATC  
841 AAAGAAACGA TGTTAAGAA TGGCGCGATT AATGCAGATA TTGTTGGTAA GTCCGCATAC  
901 ATTATCGCGA AGATGGCGGG TATCGAAGTT CCGCAAACCA CCAAATCTT GATCCGCGAA  
961 GTGCAGAGCG TGGAGAAGAG CGAACTGTTC AGCCATGAGA AACTGAGCCC GGTCTGGCT  
1021 ATGTACAAAG TGAAGGACTT TGACGAAGCC CTGAAGAAAG CTCAGCGTCT GATTGAGCTG  
1081 GGCGGCAGCC ACCACACGAG CAGCCTGTAT ATCGATAGCC AAAACAATAA GGACAAGGTG  
1141 AAAGAGTTCG GTCTGGCGAT GAAAACCTCT CGCACGTTTA TCAACATGCC GAGCAGCCAA  
1201 GGTGCGAGCG GCGATCTGTA TAACTTCGCA ATCGCGCCTT CTTTTACGCT GGGTTGCGGT  
1261 ACCTGGGGCG GTAATTCGGT GAGCCAGAAT GTCGAGCCGA AGCACCTGCT GAACATCAA  
1321 TCGGTGCGCG AGCGCCGTGA GAAGAGACCG TGGTTCAAAG TCCCACAGAA AATTACTTTC  
1381 AAATACGGCT GCCTGCGTTT CGCGCTGAAA GAACTGAAAG ACATGAACAA AAAGCGTGCG  
1441 TTCATTGTTA CCGACAAAGA CCTGTTCAAA CTGGGTTACG TGAACAAAAT CACCAAAGTT  
1501 CTGGATGAAA TTGACATCAA GTACTCCATC TTCACTGATA TCAAATCCGA CCCAACGATT  
1561 GATAGCGTGA AAAAGGGCGC TAAAGAAATG CTGAACTTTG AACC GGACAC CATCATCAGC  
1621 ATCGGTGGTG GCTCTCCTAT GGATGCTGCG AAGGTCATGC ACCTGCTGTA CGAATACCCG  
1681 GAACGGGAAA TCGAAAACCT GGCTATCAAC TTCATGGACA TCCGAAAACG TATCTGCAAC  
1741 TTCCCGAAGC TGGGCACTAA AGCTATTTCC GTTGCCATCC CGACTACCCG GGGCACTGGT  
1801 TCCGAAGCCA CGCCGTTCGC CGTGATCACC AACGATGAAA CCGGTATGAA ATACCCGCTG  
1861 ACCTCTTACG AACTGACCCC GAACATGGCA ATTATCGACA CCGAGCTGAT GCTGAACATG  
1921 CCGCGCAAGC TGACCGCTGC TACCGGCATC GACGCTCTGG TACATGCTAT TGAGGCGTAC  
1981 GTTTCGGTGA TGGTACCGA TTACACCGAC GAACTGGCCC TGGTGGCGAT CAAAATGATT  
2041 TTCAAGTACG TGCCTCGCGC TTACAAAAAC GGCACGAATG ACATCGAGGC GCGTGAGAAA  
2101 ATGCGCCATG CAAGCAACAT CGCGGGCATG GCCTTCGCCA ACGCGTTCCT GGGCTGTGTC  
2161 CACTCTATGG CTCACAAACT GGGTGTATAG CACCACGTGC CGCACGGTAT CGCGTGTGCT  
2221 GTCTGATCG AAGAAGTAAT TAAGTACAAC GCTACTGATT GCCCGACTAA ACAGACCGCC  
2281 TTCCACAGT ACAAATCTCC TAACGCTAAA CGTAAGTACG CTGAGATCGC CGAATACCTG  
2341 AACCTGAAGG GTACGAGCGA CACTGAGAAA GTTACTGCGC TGATCGAAGC TATCTCTAAA  
2401 CTGAAAATTG ACCTGTCCAT CCCGAGAAC ATCAGCGCCG CAGGCATCAA CAAAAGGAC  
2461 TTTTACAACA CGCTGGACAA AATGAGCGAA CTGGCTTTTG ACGACCAGTG CACCCTGCA  
2521 AACCCGCGTT ACCCGCTGAT CTCTGAGCTG AAAGACATTT ATATCAAATC TTTTTAA

**AdhE2.36 (76965)**

1 ATGAAAAGTGA CGAACCAAAA AGAACTGAAA CAAAAACTGA ATGAACTGCG TGAGGCCCGAG  
61 AAAAAAGTTCG CTACGTATAC CCAGGAGCAA GTTGACAAGA TCTTCAAACA GTGTGCCATT  
121 CCGGCTGCCA AATACCGTAT TAACTTGGCC AAAGTGGCGG TGGAAAGAAC CGGCATCGGT  
181 CTGGTGCAGG ACAAGATTAT CAAGAATCAC TTTGCCGCGG AGTATATCTA CAACAAATAC  
241 AAAAACCACA AGACTTGGCG CATCATTGAT CATGATGACA GCTTGGGTAT CACGAAAGTC  
301 GCAGAACCAA TCGGTATTGT CGCGCAATT GTCCCGACCA CTAATCCGAC CAGCACC GCG  
361 ATCTTCAAGA GCTTGATCAG CCTGAAAACC CGCAACGCGA TTTTCTTCAG CCCGCACCCG  
421 CGTGCGAAGA AGAGCACCAT CGCAGCGGCG AAGCTGATTT TGGATGCCGC GGTAAAGGCC  
481 GGTGCACCGA AAAACATTAT TGGCTGGATT GACGAGCCGA GCATTGAGCT GTCTCAGGAC  
541 CTGATGAAAG AAGCGGACAT TATTCTGGCC ACCGGTGGTC CGTCTATGGT TAAGGCAGCG  
601 TACTCCAGCG GTAAGCCTGC TATCGGCGTT GGTGCGGGCA ATACGCCGGC TATCATCGAT  
661 GAAAGCGCGG ATATTGATAT GGCAGTTAGC TCCATCATTC TGTCCAAAAC CTACGACAAT  
721 GGTGTATCT GTGCAAGCGA GCAAAGCATC CTGGTGATGA ATAGCATTTA CGAGAAGGTC  
781 AAAGAAGAGT TTGTTAAGCG TGGTTCCTAT ATTCTGAACC AGAACGAGAT TGCAAAAATC  
841 AAAGAAACGA TGTTAAGAA TGGCGCGATT AATGCAGATA TTGTTGGTAA GTCCGCATAC  
901 ATTATCGCGA AGATGGCGGG TATCGAAGTG CCGCAAACCA CCAAATCTT GATCCGCGAA  
961 GTGCAGAGCG TGGAGAAGAG CGAACTGTTC AGCCATGAGA AACTGAGCCC GGTCTGGCT  
1021 ATGTACAAAG TGAAGGACTT TGACGAAGCC CTGAAGAAAG CTCAGCGTCT GATTGAGCTG  
1081 GGCGGCAGCG GTCACACGAG CAGCCTGTAT ATCGATAGCC AAAACAATAA GGACAAGGTG  
1141 AAAGAGTTCG GTCTGGCGAT GAAAACCTCT CGCACGTTTA TCAACATGCC GAGCAGCCAA  
1201 GGTGCGAGCG GCGATCTGTA TAACTTCGCA ATCGCGCCTT CTTTTACGCT GGGTTGCGGT  
1261 ACCTGGGGCG GTAATTCGGT GAGCCAGAAT GTCGAGCCGA AGCACCTGCT GAACATCAA

|      |            |            |            |            |             |            |
|------|------------|------------|------------|------------|-------------|------------|
| 1321 | TCGGTCGCGG | AGCGCCGTGA | GAAGAGACCG | TGGTTCAAAG | TCCCACAGAA  | AATTTACTTC |
| 1381 | AAATACGGCT | GCCTGCGTTT | CGCGCTGAAA | GAAGTAAAAG | ACATGAACAA  | AAAGCGTGCG |
| 1441 | TTCATTGTTA | CCGACAAAAG | CCTGTTCAAA | CTGGGTTACG | TGAACAAAAT  | CACCAAAGTT |
| 1501 | CTGGATGAAA | TTGACATCAA | GTACTCCATC | TTCACTGATA | TCAAATCCGA  | CCCAACGATT |
| 1561 | GATAGCGTGA | AAAAGGGCGC | TAAAGAAATG | CTGAACTTTG | AACCGGACAC  | CATCATCAGC |
| 1621 | ATCGGTGGTG | GCTCTCCTAT | GGATGCTGCG | AAGGTCATGC | ACCTGCTGTA  | CGAATACCCG |
| 1681 | GAAGCGGAAA | TCGAAAACCT | GGCTATCAAC | TTCATGGACA | TCCGCAAACG  | TATCTGCAAC |
| 1741 | TTCCCGAAGC | TGGGCACTAA | AGCTATTTCC | GTTGCCATCC | CGACTACCGC  | GGGCACTGGT |
| 1801 | TCCGAAGCCA | CGCCGTTTCG | CGTGATCACC | AACGATGAAA | CCGGTATGAA  | ATACCCGCTG |
| 1861 | ACCTCTTACG | AACTGACCCC | GAACATGGCA | ATTATCGACA | CCGAGCTGAT  | GCTGAACATG |
| 1921 | CCGCGCAAGC | TACCGCTGCG | TACCGGCATC | GACGCTCTGG | TACATGCTAT  | TGAGGCGTAC |
| 1981 | GTTTCCGTGA | TGGCTACCGA | TTACACCGAC | GAAGTGGCCC | TGCGTGCGAT  | CAAAATGATT |
| 2041 | TTCAAGTACC | TGCCTCGCGC | TTACAAAAAC | GGCACGAATG | ACATCGAGGC  | GCGTGAGAAA |
| 2101 | ATGGCCCATG | CAAGCAACAT | CGCGGGCATG | GCCTTCGCCA | ACGCGTTCCCT | GGGCGTGTGC |
| 2161 | CACTCTATGG | CTCACAAACT | GGTGCTATAG | CACCACGTGC | CGCACGGTAT  | CGCGTGTGCT |
| 2221 | GTCCTGATCG | AAGAAGTAAT | TAAGTACAAC | GCTACTGATT | GCCCCACTAA  | ACAGACCCGC |
| 2281 | TTCCACAGT  | ACAAATCTCC | TAACGCTAAA | CGTAAGTACG | CTGAGATCGC  | CGAATACCTG |
| 2341 | AACCTGAAGG | GTACGAGCGA | CACTGAGAAA | GTTACTGCGC | TGATCGAAGC  | TATCTCTAAA |
| 2401 | CTGAAAATTG | ACCTGTCCAT | CCCGCAGAAC | ATCAGCGCCG | CAGGCATCAA  | CAAAAAGGAC |
| 2461 | TTTTACAACA | CGCTGGACAA | AATGAGCGAA | CTGGCTTTTG | ACGACCAGTG  | CACCACTGCA |
| 2521 | AACCCGCGTT | ACCCGCTGAT | CTCTGAGCTG | AAAGACATTT | ATATCAAATC  | TTTTTAA    |

**AdhE2.37 (76966)**

|      |            |            |            |            |             |             |
|------|------------|------------|------------|------------|-------------|-------------|
| 1    | ATGAAAGTGA | CGAACCAAAA | AGAAGTAAA  | CAAAAAGTGA | ATGAACTGCG  | TGAGGCCAG   |
| 61   | AAAAAGTTCG | CTACGTATAC | CCAGGCGCAA | GTTGACAAGA | TCTTCAAACA  | GTGTGCCATT  |
| 121  | GCGGCTGCCA | AAGAGCGTAT | TAAGTGGGCC | AAAGTGGCGG | TGGAAGAAAC  | CGGCATCGGT  |
| 181  | CTGGTCGAGG | ACAAGATTAT | CAAGAATCAC | TTTGCCGCGG | AGTATATCTA  | CAACAAATAC  |
| 241  | AAAAACGAAA | AGACTTGCGG | CATCATTGAT | CATGATGACA | GCTTGGGTAT  | CACGAAAGTC  |
| 301  | GAGAACCAAA | TCGGTATTGT | CGCGGCAATT | GTCCCGACCA | CTAATCCGAC  | CAGCACCGCG  |
| 361  | ATCTTCAAGA | GCTTGATCAG | CCTGAAAACC | CGCAACGCGA | TTTTCTTCAG  | CCCGCACCCG  |
| 421  | CGTGCGAAGA | AGAGCACCAT | CGCAGCGGCG | AAGCTGATTT | TGGATGCCCG  | GGTTAAGGCC  |
| 481  | GGTGACCGA  | AAAACATTAT | TGGCTGGATT | GACGAGCCGA | GCATTGAGCT  | GTCTCAGGAC  |
| 541  | CTGATGAGCG | AAGCGGACAT | TATTCTGGCC | ACCGGTGGTC | CGTCTATGGT  | TAAGGCAGCG  |
| 601  | TACTCCAGCG | GTAAGCCTGC | TATCGGCGTT | GGTGCGGGCA | ATACGCCGGC  | TATCATCGAT  |
| 661  | GAAAGCGCGG | ATATTGATAT | GGCAGTTAGC | TCCATCATTG | TGTCCAAAAC  | CTACGCAAT   |
| 721  | GGTGTATCT  | GTGCAAGCGA | GCAAAGCATC | CTGGTGATGA | ATAGCATTTA  | CGAGAAGGTC  |
| 781  | AAAGAAGAGT | TTGTTAAGCG | TGGTTCCTAT | ATTCTGAACC | AGAACGAGAT  | TGCAAAAATC  |
| 841  | AAAGAAACGA | TGTTAAGAA  | TGGCGCGATT | AATGCAGATA | TTGTTGGTAA  | GTCCGCATAC  |
| 901  | ATTATCGCGA | AGATGGCGGG | TATCGAAGTG | CCGCAAACCA | CCAAAATCTT  | GATCGGCGAA  |
| 961  | GTGCAGGACG | TGGAGAAGAG | CGAACTGTTC | AGCCATGAGA | AACTGAGCCC  | GGTTCCTGGCT |
| 1021 | ATGTACAAAG | TGAAGGACTT | TGACGAAGCC | CTGAAGAAAG | CTCAGCGTCT  | GATTGAGCTG  |
| 1081 | GCGCGGACCG | GTCACACGAG | CAGCCTGTAT | ATCGATAGCC | AAAACAATAA  | GGACAAGGTG  |
| 1141 | AAAGAGTTCG | GTCTGGCGAT | GAAAACCTCT | CGCACGTTTA | TCAACATGCC  | GAGCAGCCAA  |
| 1201 | GGTGCAGCG  | GCGATCTGTA | TAAGTTCGCA | ATCGCGCCTT | CTTTTACGCT  | GGGTTGCCCG  |
| 1261 | ACCTGGGGCG | GTAATTCGGT | GAGCCAGAAT | GTCGAGCCGA | AGCACCTGCT  | GAACATCAAA  |
| 1321 | TCGGTCGCGG | AGCGCCGTGA | GAAGAGACCG | TGGTTCAAAG | TCCCACAGAA  | AATTTACTTC  |
| 1381 | AAATACGGCT | GCCTGCGTTT | CGCGCTGAAA | GAAGTAAAAG | ACATGAACAA  | AAAGCGTGCG  |
| 1441 | TTCATTGTTA | CCGACAAAAG | CCTGTTCAAA | CTGGGTTACG | TGAACAAAAT  | CACCAAAGTT  |
| 1501 | CTGGATGAAA | TTGACATCAA | GTACTCCATC | TTCACTGATA | TCAAATCCGA  | CCCAACGATT  |
| 1561 | GATAGCGTGA | AAAAGGGCGC | TAAAGAAATG | CTGAACTTTG | AACCGGACAC  | CATCATCAGC  |
| 1621 | ATCGGTGGTG | GCTCTCCTAT | GGATGCTGCG | AAGGTCATGC | ACCTGCTGTA  | CGAATACCCG  |
| 1681 | GAAGCGGAAA | TCGAAAACCT | GGCTATCAAC | TTCATGGACA | TCCGCAAACG  | TATCTGCAAC  |
| 1741 | TTCCCGAAGC | TGGGCACTAA | AGCTATTTCC | GTTGCCATCC | CGACTACCGC  | GGGCACTGGT  |
| 1801 | TCCGAAGCCA | CGCCGTTTCG | CGTGATCACC | AACGATGAAA | CCGGTATGAA  | ATACCCGCTG  |
| 1861 | ACCTCTTACG | AACTGACCCC | GAACATGGCA | ATTATCGACA | CCGAGCTGAT  | GCTGAACATG  |
| 1921 | CCGCGCAAGC | TGACCGCTGC | TACCGGCATC | GACGCTCTGG | TACATGCTAT  | TGAGGCGTAC  |
| 1981 | GTTTCCGTGA | TGGCTACCGA | TTACACCGAC | GAAGTGGCCC | TGCGTGCGAT  | CAAAATGATT  |
| 2041 | TTCAAGTACC | TGCCTCGCGC | TTACAAAAAC | GGCACGAATG | ACATCGAGGC  | GCGTGAGAAA  |
| 2101 | ATGGCCCATG | CAAGCAACAT | CGCGGGCATG | GCCTTCGCCA | ACGCGTTCCCT | GGGCGTGTGC  |
| 2161 | CACTCTATGG | CTCACAAACT | GGTGCTATAG | CACCACGTGC | CGCACGGTAT  | CGCGTGTGCT  |
| 2221 | GTCCTGATCG | AAGAAGTAAT | TAAGTACAAC | GCTACTGATT | GCCCCACTAA  | ACAGACCCGC  |
| 2281 | TTCCACAGT  | ACAAATCTCC | TAACGCTAAA | CGTAAGTACG | CTGAGATCGC  | CGAATACCTG  |

|      |            |            |            |            |            |            |
|------|------------|------------|------------|------------|------------|------------|
| 2341 | AACCTGAAGG | GTACGAGCGA | CACTGAGAAA | GTTACTGCGC | TGATCGAAGC | TATCTCTAAA |
| 2401 | CTGAAAATTG | ACCTGTCCAT | CCCGCAGAAC | ATCAGCGCCG | CAGGCATCAA | CAAAAAGGAC |
| 2461 | TTTTACAACA | CGCTGGACAA | AATGAGCGAA | CTGGCTTTTG | ACGACCAGTG | CACCACTGCA |
| 2521 | AACCCGCGTT | ACCCGCTGAT | CTCTGAGCTG | AAAGACATTT | ATATCAAATC | TTTTTAA    |

**AdhE2.38 (76967)**

|      |             |            |            |             |             |             |
|------|-------------|------------|------------|-------------|-------------|-------------|
| 1    | ATGAAAAGTGA | CGAACCAAAA | AGAAGTAAAA | CAAAAAGTGA  | ATGAACTGCG  | TGAGGCCCGAG |
| 61   | AAAAAGTTTC  | CTACGATGAC | CCAGGAGCAA | GTTGACAAGA  | TCTTCAAACA  | GTGTGCCATT  |
| 121  | GCGGCTGCCA  | AAGAGCGTAT | TAAGTGGGCC | AAACTGGCGG  | TGGAAGAAAC  | CGGCATCGGT  |
| 181  | CTGGTCGAGG  | ACAAGATTAT | CAAGAATCAC | TTTGCCGCGG  | AGTATATCTA  | CAACAAATAC  |
| 241  | AAAAACGAAA  | AGACTTGCGG | CATCATTGAT | CATGATGACA  | GCTTGGGTAT  | CACGAAAGTC  |
| 301  | GCAGAACCAA  | TCGGTATTGT | CGCGGCAATT | GTCCCGACCA  | CTAATCCGAC  | CAGCACCAGG  |
| 361  | ATCTTCAAGA  | GCTTGATCAG | CCTGAAAACC | CGCAACGCGA  | TTTTCTTCAG  | CCCGCACCCG  |
| 421  | CGTGCGAAGA  | AGAGCACCAT | CGCAGCGGCG | AAGCTGATTT  | TGGATGCCGC  | GGTTAAGGCC  |
| 481  | GGTGACCCGA  | AAAACATTAT | TGGCTGGATT | GACGAGCCGA  | GCATTGAGCT  | GTCTCAGGAC  |
| 541  | CTGATGAGCG  | AAGCGGACAT | TATTCTGGCC | ACCGGTGGTC  | CGTCTATGGT  | TAAGGCAGCG  |
| 601  | TACTCCAGCG  | GTAAGCCTGC | TATCGGCGTT | GGTGCGGGCA  | ATACGCCGGC  | TATCATCGAT  |
| 661  | GAAAGCGCGG  | ATATTGATAT | GGCAGTTAGC | TCCATCATTC  | TGTCCAAAAC  | CTACGACAAT  |
| 721  | GGTGTATCT   | GTGCAAGCGA | GCAAAGCATC | CTGGTGATGA  | ATAGCATTTA  | CGAGAAGGTC  |
| 781  | AAAGAAGAGT  | TTGTTAAGCG | TGGTTCCTAT | ATTCTGAACC  | AGCAGGAGAT  | TGCAAAAATC  |
| 841  | AAAGAAACGA  | TGTTAAGAA  | TGGCGCGATT | AATGCAGATA  | TTGTTGGTAA  | GTCCGCATAC  |
| 901  | ATTATCGCGA  | AGATGGCGGG | TATCGAAGTG | CGCAAACCA   | CCAAAATCTT  | GATCGGCGAA  |
| 961  | GTGCAGAGCG  | TGGAGAAGAG | CGAACTGTTC | AGCCATGAGA  | AACTGAGCCC  | GGTTCTGGCT  |
| 1021 | ATGTACAAAG  | TGAAGGACTT | TGACGAAGCC | CTGAAGAAAG  | CTCAGCGTCT  | GATTGAGCTG  |
| 1081 | GGCGGCAGCG  | GTCACACGAG | CAGCCTGTAT | ATCGATAGCC  | AAAACAATAA  | GGACAAGGTG  |
| 1141 | AAAGAGTTTC  | GTCTGGCGAT | GAAAACCTCT | CGCACGTTTA  | TCAACATGCC  | GAGCAGCCAA  |
| 1201 | GGTGCAGAGCG | GCGATCTGTA | TAAGTTCGCA | ATCGCGCCTT  | CTTTTACGCT  | GGGTTGCGGT  |
| 1261 | ACCTGGGAGG  | GTAATTCGGT | GAGCCAGAAT | GTCGAGCCGA  | AGCACCTGCT  | GAACATCAA   |
| 1321 | TCGGTCGCGG  | AGCGCCGTGA | GAAGAGACCG | TGGTTCAAAG  | TCCCACAGAA  | AATTTACTTC  |
| 1381 | AAATACGGCT  | GCCTGCGTTT | CGCGCTGAAA | GAAGTGAAG   | ACATGAACAA  | AAAGCGTGCG  |
| 1441 | TTCATTGTTA  | CCGACAAAGA | CCTGTTCAAA | CTGGGTTACG  | TGAACAAAAT  | CACCAAAGTT  |
| 1501 | CTGGATGAAA  | TTGACATCAA | GTACTCCATC | TTCACTGATA  | TCAAATCCGA  | CCCAACGATT  |
| 1561 | GATAGCGTGA  | AAAAGGGCGC | TAAAGAAATG | CTGAACTTTG  | AACCGGACAC  | CATCATCAGC  |
| 1621 | ATCGGTGGTG  | GCTCTCCTAT | GGATGCTGAC | AAGGTGATGC  | ACCTGCTGTA  | CGAATACCCG  |
| 1681 | GAAGCGGAAA  | TCGAAAACCT | GGTATCAAC  | TTCAATGGACA | TCCGAAAACG  | TATCTGCAAC  |
| 1741 | TTCCCGAAGC  | TGGGCACTAA | AGCTATTTCC | GTTGCCATCC  | CGACTACCGC  | GGGCACTGGT  |
| 1801 | TCCGAAGCCA  | CGCCGTTGCG | CGTGATCACC | AACGATGAAA  | CCGGTATGAA  | ATACCCGCTG  |
| 1861 | ACCTCTTACG  | AACTGACCCC | GAACATGGCA | ATTATCGACA  | CCGAGCTGAT  | GCTGAACATG  |
| 1921 | CCGCGCAAGC  | TGACCGCTGC | TACCGGCATC | GACGCTCTGG  | TACATGCTAT  | TGAGGCGTAC  |
| 1981 | GTTTCCGTTA  | TGGTACCGA  | TTACACCGAC | GAAGTGGCCC  | TGCGTGCGAT  | CAAAAATGAT  |
| 2041 | TTCAAGTACC  | TGCTTCGCGC | TTACAAAAC  | GGCAGCAATG  | ACATCGAGGC  | GCGTGAGAAA  |
| 2101 | ATGGCCCATC  | CAAGCAACAT | CGCGGGCATG | GCCTTCGCCA  | ACGCGTTCC   | GGGCGTGTGC  |
| 2161 | CACTCTATGG  | CTCACAAACT | GGGTGCTATG | CACCACGTGC  | CGCACGGTAT  | CGCGTGTGCT  |
| 2221 | GTCCTGATCG  | AAGAAGTAAT | TAAGTACAAC | GCTACTGATT  | GCCCAGACTAA | ACAGACCGCC  |
| 2281 | TTCCACAGT   | ACAAATCTCC | TAACGCTAAA | CGTAAGTACG  | CTGAGATCGC  | CGAATACCTG  |
| 2341 | AACCTGAAGG  | GTACGAGCGA | CACTGAGAAA | GTTACTGCGC  | TGATCGAAGC  | TATCTCTAAA  |
| 2401 | CTGAAAATTG  | ACCTGTCCAT | CCCGCAGAAC | ATCAGCGCCG  | CAGGCATCAA  | CAAAAAGGAC  |
| 2461 | TTTTACAACA  | CGCTGGACAA | AATGAGCGAA | CTGGCTTTTG  | ACGACCAGTG  | CACCACTGCA  |
| 2521 | AACCCGCGTT  | ACCCGCTGAT | CTCTGAGCTG | AAAGACATTT  | ATATCAAATC  | TTTTTAA     |

**AdhE2.39 (76968)**

|     |             |            |            |            |            |             |
|-----|-------------|------------|------------|------------|------------|-------------|
| 1   | ATGAAAAGTGA | CGAACCAAAA | AGAAGTAAAA | CAAAAAGTGA | ATGAACTGCG | TGAGGCCCGAG |
| 61  | AAAAAGTTTC  | CTACGTATAC | CCAGGAGCAA | GTTGACAAGA | TCTTCAAACA | GTGTGCCATT  |
| 121 | GCGGCTGCCA  | AAGAGCGTAT | TAAGTGGGCC | AAACTGGCGG | TGGAAGAAAC | CGGCATCGGT  |
| 181 | CTGGTCGAGG  | ACAAGATTAT | CAAGAATCAC | TTTGCCGCGG | AGTATATCTA | CAACAAATAC  |
| 241 | AAAAACGAAA  | AGACTTGCGG | CATCATTGAT | CATGATGACA | GCTTGGGTAT | CACGAAAGTC  |
| 301 | GCAGAACCAA  | TCGGTATTGT | CGCGGCAATT | GTCCCGACCA | CTAATCCGAC | CAGCACCAGG  |
| 361 | ATCTTCAAGA  | GCTTGATCAG | CCTGAAAACC | CGCAACGCGA | TTTTCTTCAG | CCCGCACCCG  |
| 421 | CGTGCGAAGA  | AGAGCACCAT | CGCAGCGGCG | ACCCTGATTT | TGGATGCCGC | GGTTAAGGCC  |
| 481 | GGTGACCCGA  | AAAACATTAT | TGGCTGGATT | GACGAGCCGA | GCATTGAGCT | GTCTCAGGAC  |
| 541 | CTGATGAGCG  | AAGCGGACAT | TATTCTGGCC | ACCGGTGGTC | CGTCTATGGT | TAAGGCAGCG  |
| 601 | TACTCCAGCG  | GTAAGCCTGC | TATCGGCGTT | GGTGCGGGCA | ATACGCCGGC | TATCATCGAT  |

|      |             |            |             |            |             |             |
|------|-------------|------------|-------------|------------|-------------|-------------|
| 661  | GAAAGCGCGG  | ATATTGATAT | GGCAGTTAGC  | TCCATCATTC | TGTCCAAAAC  | CTACGACAAT  |
| 721  | GGTGTATCT   | GTGCAAGCGA | GCAAAGCATC  | CTGGTGATGA | ATAGCATTTA  | CGAGAAGGTC  |
| 781  | AAAGAAGAGT  | TTGTTAAGCG | TGGTTCCTAT  | ATTCTGAACC | AGAACGAGAT  | TGCAAAAATC  |
| 841  | AAAGAAACGA  | TGTTTAAGAA | TGGCGCGATT  | AATGCAGATA | TTGTTGGTAA  | GTCCGCATAC  |
| 901  | ATTATCGCGA  | AGATGGCGGG | TATCGAAGTG  | CCGCAAACCA | CCAAAATCTT  | GATCGGCGAA  |
| 961  | GTGCAGAGCG  | TGGAGAAGAG | CGAACTGTTC  | AGCCATGAGA | AACTGAGCCC  | GGTTCTGGCT  |
| 1021 | ATGTACAAAG  | TGAAGGACTT | TGACGAAGCC  | CTGAAGAAAG | CTGAGCGTCT  | GATTGAGCTG  |
| 1081 | GGCGGCAGCG  | GTCACACGAG | CAGCCTGTAT  | ATCGATAGCC | AAAACAATAA  | GGACAAGGTG  |
| 1141 | AAAGAGTTCG  | GTCTGGCGAT | GAAAACCTCT  | ATCACGTTTA | TCAACATGCC  | GAGCAGCCAA  |
| 1201 | GGTGCAGGCG  | GCGATCTGTA | TAAC TTCGCA | ATCGCGCCTT | CTTTTACGCT  | GGGTTCGCGT  |
| 1261 | ACCTGGGGCG  | GTAATTCGGT | GAGCCAGAAT  | GTCGAGCCGA | AGCACCTGCT  | GAACATCAAA  |
| 1321 | TCGGTTCGCG  | AGCCCGTGA  | GAAGAGACCG  | TGGTTCAAAG | TCCCACAGAA  | AATTTACTTC  |
| 1381 | AAATACGGCT  | GCCTGCGTTT | CGCGCTGAAA  | GAAGTAAAAG | ACATGAACAA  | AAAGCGTGCG  |
| 1441 | TTCATTGTTA  | CCGACAAAGA | CCTGTTCAAA  | CTGGGTTACG | TGAACAAAAT  | CACCAAAGTT  |
| 1501 | CTGGATGAAA  | TTGACATCAA | GTAATCCATC  | TTCATGATA  | TCAAATCCGA  | CCCAACGATT  |
| 1561 | GATAGCGTGA  | AAAAGGGCGC | TAAAGAAATG  | CTGAACTTTG | AACCGGACAC  | CATCATCAGC  |
| 1621 | ATCGGTGGTG  | GCTCTCCTAT | GGATGCTGCG  | AAGGTCATGC | ACCTGCTGTA  | CGAATACCCG  |
| 1681 | GAAGCGGAAA  | TCGAAAACCT | GGCTATCAAC  | TTCATGGACA | TCCGCAAACG  | TATCTGCAAC  |
| 1741 | TTCCCGAAGC  | TGGGCACTAA | AGCTATTTCC  | GTTGCCATCC | CGACTACCGC  | GGGCACTGGT  |
| 1801 | TCCGAAGCCA  | CGCCGTTGCG | CGTGATCACC  | AACGATGAAA | CCGGTATGAA  | ATACCCGCTG  |
| 1861 | ACCTCTTACG  | AACTGACCCC | GAACATGGCA  | ATTATCGACA | CCGAGCTGAT  | GCTGAACATG  |
| 1921 | CCGCGCAAGC  | TGACCGCTGC | TACCGGCATC  | GACGCTCTGG | TACATGCTAT  | TGAGGCGTAC  |
| 1981 | GTTTCCCGTGA | TGGTACCGA  | TTACACCGAC  | GAAGTGGCCC | TGCGTGCGAT  | CAAAAATGATT |
| 2041 | TTCAAGTACC  | TGCTTCGCGC | TTACAAAAC   | GGCACAATG  | ACATCGAGGC  | GCGTGAGAAA  |
| 2101 | ATGGCCCATG  | CAAGCAACAT | CGCGGGCATG  | GCCTTCGCCA | ACGCGTTCCCT | GGGCGTGTGC  |
| 2161 | CACTCTATGG  | CTCACAAAAC | GGGTGCTATG  | CACCACGTGC | CGCACGGTAT  | CGCGTGTGCT  |
| 2221 | GTCCTGATCG  | AAGAAGTAAT | TAAGTACAAC  | GCTACTGATT | GCCCAGCTAA  | ACAGACCGCC  |
| 2281 | TTCCACAGT   | ACAAATCTCC | TAACGCTAAA  | CGTAAGTACG | CTGAGATCGC  | CGAATACCTG  |
| 2341 | AACCTGAAGG  | GTACGAGCGA | CACTGAGAAA  | GTTACTGCGC | TGATCGAAGC  | TATCTCTAAA  |
| 2401 | CTGAAAATTG  | ACCTGTCCAT | CCCGCAGAAC  | ATCAGCGCCG | CAGGCATCAA  | CAAAAAGGAC  |
| 2461 | TTTTACAACA  | CGCTGGACAA | AATGAGCGAA  | CTGGCTTTTG | ACGACCAGTG  | CACCACTGCA  |
| 2521 | AACCCGCGTT  | ACCCGCTGAT | CTCTGAGCTG  | AAAGACATTT | ATATCAAATC  | TTTTTTAA    |

**AdhE2.40 (76969)**

|      |            |            |             |            |            |             |
|------|------------|------------|-------------|------------|------------|-------------|
| 1    | ATGAAAGTGA | CGAACCAAAA | AGAAGTAAA   | CAAAAAGTGA | ATGAAAGTGC | TGAGGCCCGAG |
| 61   | AAAAAGTTCG | CTACGTATAC | CCAGGCGCAA  | GTTGAGAAGA | TCTTCAAACA | GTGTGCCATT  |
| 121  | GCGGCTGCCA | AAGAGCGTAT | TAAC TTGGCC | AAACTGGCGG | TGGAAGAAAC | CGGCATCGGT  |
| 181  | CTGGTCGAGG | ACAAGATTAT | CAAGAATCAC  | TTTGCCGCGG | AGTATATCTA | CAACAAATAC  |
| 241  | AAAAACGAAA | AGACTTGCGG | CATCATTGAT  | CATGATGACA | GCTTGGGTAT | CACGAAAGTC  |
| 301  | GCAGAACCAA | TCGGTATTGT | CGCGGCAATT  | GTCCCGACCA | CTAATCCGAC | CAGCACCCCG  |
| 361  | ATCTTCAAGA | GCTTGATCAG | CCTGAAAACC  | CGCAACGCGA | TTTTCTTCAG | CCCGCACCCG  |
| 421  | CGTGCGAAGA | AGAGCACCAT | CGCAGCGCGC  | AAGCTGATTT | TGGATGCCCG | GGTTAAGGCC  |
| 481  | GGTGCACCGA | AAAACATTAT | TGGCTGGATT  | GACGAGCCGA | GCATTGAGCT | GTCTCAGGAC  |
| 541  | CTGATGAGCG | AAGCGGACAT | TATTCTGGCC  | ACCGGTGGTC | CGTCTATGGT | TAAGGCAGCG  |
| 601  | TACTCCAGCG | GTAAGCCTGC | TATCGGCGTT  | GGTGCGGGCA | ATACGCCGGC | TATCATCGAT  |
| 661  | GAAAGCGCGG | ATATTGATAT | GGCAGTTAGC  | TCCATCATTC | TGTCCAAAAC | CTACGACAAT  |
| 721  | GGTGTATCT  | GTGCAAGCGA | GCAAAGCATC  | CTGGTGATGA | ATAGCATTTA | CGAGAAGGTC  |
| 781  | AAAGAAGAGT | TTGTTAAGCG | TGGTTCCTAT  | ATTCTGAACC | AGAACGAGAT | TGCAAAAATC  |
| 841  | AAAGAAACGA | TGTTTAAGAA | TGGCGCGATT  | AATGCAGATA | TTGTTGGTAA | GTCCGCATAC  |
| 901  | ATTATCGCGA | AGATGGCGGG | TATCGAAGTG  | CCGCAAACCA | CCAAAATCTT | GATCGGCGAA  |
| 961  | GTGCAGAGCG | TGGAGAAGAG | CGAACTGTTC  | AGCCATGAGA | AACTGAGCCC | GGTTCTGGCT  |
| 1021 | ATGTACAAAG | TGAAGGACTT | TGACGAAGCC  | CTGAAGAAAG | CTCAGCGTCT | GATTGAGCTG  |
| 1081 | GGCGGCAGCG | GTCACACGAG | CAGCCTGTAT  | ATCGATAGCC | AAAACAATAA | GGACAAGGTG  |
| 1141 | AAAGAGTTCG | GTCTGGCGAT | GAAAACCTCT  | CGCACGTTTA | TCAACATGCC | GAGCAGCCAA  |
| 1201 | GGTGCAGGCG | GCGATCTGTA | TAAC TTCGCA | ATCGCGCCTT | CTTTTACGCT | GGCGTCCGGT  |
| 1261 | ACCTGGGGCG | GTAATTCGGT | GAGCCAGAAT  | GTCGAGCCGA | AGCACCTGCT | GAACATCAAA  |
| 1321 | TCGGTTCGCG | AGCCCGTGA  | GAAGAGACCG  | TGGTTCAAAG | TCCCACAGAA | AATTTACTTC  |
| 1381 | AAATACGGCT | GCCTGCGTTT | CGCGCTGAAA  | GAAGTAAAAG | ACATGAACAA | AAAGCGTGCG  |
| 1441 | TTCATTGTTA | CCGACAAAGA | CCTGTTCAAA  | CTGGGTTACG | TGAACAAAAT | CACCAAAGTT  |
| 1501 | CTGGATGAAA | TTGACATCAA | GTAATCCATC  | TTCATGATA  | TCAAATCCGA | CCCAACGATT  |
| 1561 | GATAGCGTGA | AAAAGGGCGC | TAAAGAAATG  | CTGAACTTTG | AACCGGACAC | CATCATCAGC  |
| 1621 | ATCGGTGGTG | GCTCTCCTAT | GGATGCTGCG  | AAGGTCATGC | ACCTGCTGTA | CGAATACCCG  |

1681 GAAGCGGAAA TCGAAAACCT GGCTATCAAC TTCATGGACA TCCGCAAACG TATCTGCAAC  
 1741 TTCCCGAAGC TGGGCACTAA AGCTATTTCC GTTGCCATCC CGACTACCGC GGGCACTGGT  
 1801 TCCGAAGCCA CGCCGTTCGC CGTGATCACC AACGATGAAA CCGGTATGAA ATACCCGCTG  
 1861 ACCTCTTACG AACTGACCCC GAACATGGCA ATTATCGACA CCGAGCTGAT GCTGAACATG  
 1921 CCGCGCAAGC TGACCGCTGC TACCGGCATC GACGCTCTGG TACATGCTAT TGAGGCGTAC  
 1981 GTTTCCTGTA TGGTACCGA TTACACCGAC GAACTGGCCC TCGTGCAT CAAAATGATT  
 2041 TTCAAGTACC TGCCTCGCGC TTACAAAAAC GGCACGAATG ACATCGAGGC GCGTGAGAAA  
 2101 ATGGCCCATG CAAGCAACAT CGCGGGCATG GCCTTCGCCA ACGCGTTCCT GGGCGTGTGC  
 2161 CACTCTATGG CTCACAAACT GGGTGCTATG CACCACGTGC CGCACGGTAT CGCGTGTGCT  
 2221 GTCCCTGATG AAGAAGTAAT TAAGTACAAC GCTACTGATT GCCCGACTAA ACAGACCGCC  
 2281 TTCCACAGT ACAAACTCTC TAACGCTAAA CGTAAGTACG CTGAGATCGC CGAATACCTG  
 2341 AACCTGAAGG GTACGAGCGA CACTGAGAAA GTTACTGCGC TGATCGAAGC TATCTCTAAA  
 2401 CTGAAAATTG ACCTGTCCAT CCCGAGAAC ATCAGCGCCG CAGGCATCAA CAAAAGGAC  
 2461 TTTTACAACA CGCTGGACAA AATGAGCGAA CTGGCTTTTG ACGACCAGTG CACCACTGCA  
 2521 AACCCGCGTT ACCCGCTGAT CTCTGAGCTG AAAGACATTT ATATCAAATC TTTTTTAA

**AdhE2.41 (76970)**

1 ATGAAAGTGA CGAACCAAAA AGAACTGAAA CAAAACTGA ATGAACTGCG TGAGGCCAG  
 61 AAAAAAGTTCG CTACGTATAC CCAGGAGCAA GTTGACAAGA TCTTCAAACA GTGTGCCATT  
 121 GCGGCTGCCA AAGAGCGTAT TAACTTGGCC GAGCTGGCGG TGGAAAGAAC CGGCATCGGT  
 181 CTGGTCGAGG ACAAGATTAT CAAGAATCAC TTTGCCGCGG AGTATATCTA CAACAAATAC  
 241 AAAAAACGAAA AGACTTFCGG CATCATTGAT CATGATGACA GCTTGGGTAT CACGAAAGTC  
 301 GCAGAACCAA TCGGTATTGT CGCGAGCATT GTCCCGACCA CTAATCCGAC CAGCACCGCG  
 361 ATCTTCAAGA GCTTGATCAG CCTGAAAACC CGCAACGCGA TTTTCTTCAG CCCGCACCCG  
 421 CGTGCGAAGA AGAGCACCAT CGCAGCGGCG AAGCTGATTT TGGATGCCCG GGTTAAGGCC  
 481 GGTGCACCGA AAAACATTAT TGCTGGGATT GACGAGCCGA GCATTGAGCT GTCTCAGGAC  
 541 CTGATGAGCG AACCCGACAT TATTCTGGCC ACCGGTGGTC CGTCTATGGT TAAGGCAGCG  
 601 TACTCCAGCG GTAAGCCTGC TATCGGCGTT GGTGCGGGCA ATACGCCGGC TATCATCGAT  
 661 GAAAGCGCGG ATATTGATAT GGCAGTTAGC TCCATCATT TGTCCAAAAC CTACGACAAT  
 721 GGTGTTATCT GTGCAAGCGA GCAAAGCATC CTGGTGATGA ATAGCATTTA CGAGAAGGTC  
 781 AAAGAAGAGT TTGTTAAGCG TGGTTCCTAT ATTCTGAACC AGAACGAGAT TGCAAAAATC  
 841 AAAGAAACGA TGTTAAGAA TGGCGCGATT AATGCAGATA TTGTTGGTAA GTCCGCATAC  
 901 ATTATCGCGA AGATGGCGGG TATCGAAGTG CCGCAAACCA CAAAATCTT GATCGGCGAA  
 961 GTGCAGAGCG TGGAGAAGAG CGAACTGTTC AGCCATGAGA AACTGAGCCC GGTTCCTGGCT  
 1021 ATGTACAAAG TGAAGACTT TGACGAAGCC CTGAAGAAAG CTCAGCGTCT GATTGAGCTG  
 1081 GGCGCGACCG GTCACACGAG CAGCCTGTAT ATCGATAGCC AAAACAATAA GGACAAGGTG  
 1141 AAAGAGTTCG GTCTGGCGAT GAAAACCTCT CGCACGTTTA TCAACATGCC GAGCAGCCAA  
 1201 GGTGCGAGCG GCGATCTGTA TAACTTCGCA ATCGCGCCTT CTTTTACGCT GGGTTGCGGT  
 1261 ACCTGGGGCG GTAATTCGGT GAGCCAGAAT GTCGAGCCGA AGCACCTGCT GAACATCAAA  
 1321 TCGGTCCGCG AGCGCCGTGA GAAGAGACCG TGGTTCAAAG TCCCACAGAA AATTTACTTC  
 1381 AAATACGGCT GCCTGCGTTT CGCGCTGAAA GAACTGAAAG ACATGAACAA AAAGCGTGGC  
 1441 TTCATTGTTA CCGACAAGA CCTGTTCAAA CTGGGTACG TGAACAAAAT CACCAAAGTT  
 1501 CTGGATGAAA TTGACATCAA GTACTCCATC TTCACTGATA TCAAATCCGA CCCAACGATT  
 1561 GATAGCGTGA AAAAGGGCGC TAAAGAAATG CTGAACTTTG AACCGGACAC CATCATCAGC  
 1621 ATCGGTGGTG GCTCTCCTAT GGATGCTGCG AAGGTCATGC ACCTGCTGTA CGAATACCCG  
 1681 GAAGCGGAAA TCGAAAACCT GGCTATCAAC TTCATGGACA TCCGCAAACG TATCTGCAAC  
 1741 TTCCCGAAGC TGGGCACTAA AGCTATTTCC GTTGCCATCC CGACTACCGC GGGCACTGGT  
 1801 TCCGAAGCCA CGCCGTTCGC CGTGATCACC AACGATGAAA CCGGTATGAA ATACCCGCTG  
 1861 ACCTCTTACG AACTGACCCC GAACATGGCA ATTATCGACA CCGAGCTGAT GCTGAACATG  
 1921 CCGCGCAAGC TGACCGCTGC TACCGGCATC GACGCTCTGG TACATGCTAT TGAGGCGTAC  
 1981 GTTTCCTGTA TGGTACCGA TTACACCGAC GAACTGGCCC TCGTGCAT CAAAATGATT  
 2041 TTCAAGTACC TGCCTCGCGC TTACAAAAAC GGCACGAATG ACATCGAGGC GCGTGAGAAA  
 2101 ATGGCCCATG CAAGCAACAT CGCGGGCATG GCCTTCGCCA ACGCGTTCCT GGGCGTGTGC  
 2161 CACTCTATGG CTCACAAACT GGGTGCTATG CACCACGTGC CGCACGGTAT CGCGTGTGCT  
 2221 TCCTGATCG AAGAAGTAAT TAAGTACAAC GCTACTGATT GCCCGACTAA ACAGACCGCC  
 2281 TTCCACAGT ACAAACTCTC TAACGCTAAA CGTAAGTACG CTGAGATCGC CGAATACCTG  
 2341 AACCTGAAGG GTACGAGCGA CACTGAGAAA GTTACTGCGC TGATCGAAGC TATCTCTAAA  
 2401 CTGAAAATTG ACCTGTCCAT CCCGAGAAC ATCAGCGCCG CAGGCATCAA CAAAAGGAC  
 2461 TTTTACAACA CGCTGGACAA AATGAGCGAA CTGGCTTTTG ACGACCAGTG CACCACTGCA  
 2521 AACCCGCGTT ACCCGCTGAT CTCTGAGCTG AAAGACATTT ATATCAAATC TTTTTTAA

**AdhE2.42 (76971)**



1 ATGAAAGTGA CGAACCAAAA AGAACTGAAA CAAAACTGA ATGAACTGCG TGAGGCCAG  
61 AAAAAGTTTCG CTACGTATAC CCAGGAGCAA GTTGACAAGA TCTTCAAACA GTGTGCCATT  
121 GCGGCTGCCA AAGAGCGTAT TAACTTGGCC AACTGGCGG TGAAGAAAAC CGGCATCGGT  
181 CTGGTCGAGG ACAAGATTAT CAAGAATCAC TTTGCCGCGG AGTATATCTA CAACAAATAC  
241 AAAAACGAAA AGACTTGGCG CATCATTGAT CATGATGACA GCTTGGGTAT CACGAAAGTC  
301 GCAGAACCAA TCGGTATTGT CGCGCAATT GTCCCGACCA CTAATCCGAC CAGCACCAGC  
361 ATCTTCAAGA GCTTGATCAG CCTGGCGACC CGCAACGCGA TTTTCTTCAG CCCGCACCCG  
421 CGTGCGAAGA AGAGCACCAT CGCAGCGGCG AAGCTGATTT TGGATGCCGC GGTAAAGGCC  
481 GGTGCACCGA AAAACATTAT TGGCTGGATT GACGAGCCGA GCATTGAGCT GTCTCAGGAC  
541 CTGATGAGCG AAGCGGACAT TATTCTGGCC ACCGGTGGTC CGTCTATGGT TAAGGCAGCG  
601 TACTCCAGCG GTAAGCCTGC TATCGGCGTT GGTGCGGGCA ATACGCCGGC TATCATCGAT  
661 GAAAGCGCGG ATATTGATAT GGCAGTTAGC TCCATCATTC TGTCCAAAAC CTACGACAAT  
721 AACGTTATCT GTGCAAGCGA GCAAAGCATC CTGGTGATGA ATAGCATTTA CGAGAAGGTC  
781 AAAGAAGAGT TTGTTAAGCG TGGTTCCTAT ATTCTGAACC AGAACGAGAT TGCAAAAATC  
841 AAAGAAACGA TGTTTAAGAA TGGCGCGATT AATGCAGATA TTGTTGGTAA GTCCGCATAC  
901 ATTATCGCGA AGATGGCGGG TATCGAAGTG CCGCAAACCA CAAAATCTT GATCGGCGAA  
961 GTGCAGAGCG TGGAGAAGAG CGAACTGTTC AGCCATGAGA AACTGAGCCC GGTTCCTGGCT  
1021 ATGTACAAAG TGAAGGACTT TGACGAAGCC CTGAAGAAAG CTCAGCGTCT GATTGAGCTG  
1081 GCGGCGAGCG GTCACACGAG CAGCCTGTAT ATCGATAGCC AAAACAATAA GGACAAGGTG  
1141 AAAGAGTTTCG GTCTGCGTAT GAAAACCTCT CGCACGTTTA TCAACATGCC GAGCAGCCAA  
1201 GGTGCGAGCG GCGATCTGTA TAACTTCGCA ATCGCGCCTT CTTTTACGCT GGGTTGCGGT  
1261 ACCTGGGGCG GTAATTCGGT GAGCCAGAAT GTCGAGCCGA AGCACCTGCT GAACATCAAA  
1321 TCGGTCGCGG AGCGCCGTGA GAAGAGACCG TGGTTCAAAG TCCCACAGAA AATTTACTTC  
1381 AAATACGGCT GCCTGCGTTT CGCGCTGAAA GAACTGAAAG ACATGAACAA AAAGCGTGC  
1441 TTCATTGTTA CCGACAAAAGA CCTGTTCAAA CTGGGTTACG TGAACAAAAT CACCAAAGTT  
1501 CTGGATGAAA TTGACATCAA GTACTCCATC TTTACTGATA TCAAATCCGA CCCAACGATT  
1561 GATAGCGTGA AAAAGGGCGC TAAAGAAATG CTGAACTTTG AACCGGACAC CATCATCAGC  
1621 ATCGGTGGTG GCTCTCCTAT GGATGCTGCG AAGGTCATGC ACCTGCTGTA CGAATACCCG  
1681 GAAGCGGAAA TCGAAAACCT GGCTATCAAC TTCATGGACA TCCGCAAACG TATCTGCAAC  
1741 TTCCCGAAGC TGGGCACTAA AGCTATTTCC GTTGCCATCC CGACTACCGC GGGCATTGGT  
1801 TCCGAAGCCA CGCCGTTCCG CGTGATCAC AACGATGAAA CCGGTATGAA ATACCCGCTG  
1861 ACCTCTTACG AACTGACCCC GAACATGGCA ATTATCGACA CCGAGCTGAT GCTGAACATG  
1921 CCGCGCAAGC TGACCGCTGC TACCGGCATC GACGCTCTGG TACATGCTAT TGAGGCGTAC  
1981 GTTCCGCTGA TGGCTACCGA TTACACCGAC GAACTGGCCC TCGGTGCGAT CAAAATGATT  
2041 TTCAAGTACC TGCTCGCGC TTACAAAAAC GGCACGAATG ACATCGAGGC GCGTGAGAAA  
2101 ATGGCCCATG CAAGCAACAT CGCGGGCATG GCCTTCGCCA ACGCGTTTCT GGGCGTGTGC  
2161 CACTCTATGC CTCACAACT GGGTGCTATG CACCACGTGC CGCACGGTAT CGCGTGTGCT  
2221 GTCTTATCG AAGAGTAAT TAAGTACAAC GCTACTGATT GCCCGACTAA ACAGCCGCC  
2281 TTCCACAGT ACAATCTCC TAACGCTAAA CGTAAGTACG CTGAGATCGC CGAATACCTG  
2341 AACCTGAAGG GTACGAGCGA CACTGAGAAA GTTACTGCGC TGATCGAAGC TATCTCTAAA  
2401 CTGAAAATTG ACCTGTCCAT CCCGAGAAC ATCAGCGCCG CAGGCATCAA CAAAAGGAC  
2461 TTTTACAACA CGCTGGACAA AATGAGCGAA CTGGCTTTTG ACGACCAGTG CACCACTGCA  
2521 AACCCGCGTT ACCCGCTGAT CTCTGAGCTG AAAGACATTT ATATCAAATC TTTTAA

**AdhE2.43 (76972)**

1 ATGAAAGTGA CGAACCAAAA AGAACTGAAA CAAAACTGA ATGAACTGCG TGAGGCCAG  
61 AAAAAGTTTCG CTACGTATAC CCAGGAGCAA GTTGACAAGA TCTTCAAACA GTGTGCCATT  
121 GCGGCTGCCA AAGAGCGTAT TAACTTGGCC CGTCTGGCGG TGAAGAAAAC CGGCATCGGT  
181 CTGGTCGAGG ACAAGATTAT CAAGAATCAC TTTGCCGCGG AGTATATCTA CAACAAATAC  
241 AAAAACGAAA AGACTTGGCG CATCATTGAT CATGATGACA GCTTGGGTAT CACGAAAGTC  
301 GCAGAACCAA TCGGTATTGT CGCGCAATT GTCCCGACCA CTAATCCGAC CAGCACCAGC  
361 ATCTTCAAGA GCTTGATCAG CCTGAAAACC CGCAACGCGA TTTTCTTCAG CCCGCACCCG  
421 CGTGCGAAGA AGAGCACCAT CGCAGCGGCG AAGCTGATTT TGGATGCCGC GGTAAAGGCC  
481 GGTGCACCGA AAAACATTAT TGGCTGGATT GACGAGCCGA GCATTGAGCT GTCTCAGGAC  
541 CTGATGAGCG AAGCGGACAT TATTCTGGCC ACCGGTGGTC CGTCTATGGT TAAGGCAGCG  
601 TACTCCAGCG GTAAGCCTGC TATCGGCGTT GGTGCGGGCA ATACGCCGGC TATCATCGAT  
661 GAAAGCGCGG ATATTGATAT GGCAGTTAGC TCCATCATTC TGTCCAAAAC CTACGACAAT  
721 GGTGTTATCT GTGCAAGCGA GCAAAGCATC CTGGTGATGA ATAGCATTTA CGAGAAGGTC  
781 AAAAAGAGT TTGTTAAGCG TGGTTCCTAT ATTCTGAACC AGAACGAGAT TGCAAAAATC  
841 AAAGAAACGA TGTTTAAGAA TGGCGCGATT AATGCAGATA TTGTTGGTAA GTCCGCATAC  
901 ATTATCGCGA AGATGGCGGG TATCGAAGTG CCGCAAACCA CAAAATCTT GATCGGCGAA  
961 GTGCAGAGCG TGGAGAAGAG CGAACTGTTC AGCCATGAGA AACTGAGCCC GGTTCCTGGCT

1021 ATGTACAAAG TGAAGGACTT TGACGAAGCC CTGAAGAAAG CTCAGCGTCT GATTGAGCTG  
1081 GGCGGCAGCG GTCACACGAG CAGCCTGTAT ATCGATAGCC AAAACAATAA GGACAAGGTG  
1141 AAAGAGTTTC GTCTGGCGAT GAAAACCTCT CGCTTCTTTA TCAACATGCC GAGCAGCCAA  
1201 GGTGCGAGCG GCGATCTGTA TAACTTCGCA ATCGCGCCTT CTTTTACGCT GGGTTGCGGT  
1261 ACCTGGGGCG GTAATTCGGT GAGCCAGAAT GTCGAGCCGA AGCACCTGCT GAACATCAAA  
1321 TCGGTGCGCG AGCGCCGTGA GAAGAGACCG TGGTTCAAAG TCCCACAGAA AATTTACTTC  
1381 AAATACGGCT GCCTGCGTTT CGCGCTGAAA GAACTGAAAG ACATGAACAA AAAGCGTGCG  
1441 TTCATTGTTA CCGACAAAGA CCTGTTCAAA CTGGGTTACG TGAACAAAAT CACCAAAGTT  
1501 CTGGATGAAA TTGACATCAA GTACTCCATC TTCACTGATA TCAAATCCGA CCCAACGATT  
1561 GATAGCGTGA AAAAGGGCGC TAAAGAAATG CTGAACTTTG AACCGGACAC CATCATCAGC  
1621 ATCGGTGGTG GCTCTCCTAT GGATGCTGCG AAGGTCTATG ACCTGCTGTA CGAATACCCG  
1681 GAAGCGGAAA TCGAAAACCT GGCTATCAAC TTCATGGACA TCCGCAAACG TATCTGCAAC  
1741 TTCCCGAAGC TGGGCACTAA AGCTATTTCC GTTGCCATCC CGACTACCGC GGGCACTGGT  
1801 TCCGAAGCCA CGCCGTTGCG CGTGATCACC AACGATGAAA CCGGTATGAA ATACCCGCTG  
1861 ACCTCTTACG AACTGACCCC GAACATGGCA ATTATCGACA CCGAGCTGAT GCTGAACATG  
1921 CCGCGCAAGC TGACCGCTGC TACCGGCATC GACGCTCTGG TACATGCTAT TGAGGCGTAC  
1981 GTTTCGGTGA TGGCTACCGA TTACACCGAC GAACTGGCCC TCGGTGCGAT CAAAATGATT  
2041 TTCAAGTACC TGCCCTCGCG TTACAAAAAC GGCACGAATG ACATCGAGGC GCGTGAGAAA  
2101 ATGGCCCATG CAAGCAACAT CGCGGGCATG GCCTTCGCCA ACGCGTTCCCT GGGCGTGTGC  
2161 CACTCTATGG CTCACAAACT GGGTGCTATG CACCACGTGC CGCACGGTAT CGCGTGTGCT  
2221 GTCCTGATCG AAGAAGTAAT TAAGTACAAC GCTACTGATT GCCCGACTAA ACAGACCGCC  
2281 TTCCACAGT ACAATCTCC TAACGCTAAA CGTAAGTACG CTGAGATCGC CGAATACCTG  
2341 AACCTGAAGG GTACGAGCGA CACTGAGAAA GTTACTGCGC TGATCGAAGC TATCTCTAAA  
2401 CTGAAAATTG ACCTGTCCAT CCCGAGAAC ATCAGCGCCC CAGGCATCAA CAAAAGGAC  
2461 TTTTACAACA CGCTGGACAA AATGAGCGAA CTGGCTTTTG ACGACCAGTG CACCCTGCA  
2521 AACCCGCGTT ACCCGCTGAT CTCTGAGCTG AAAGACATTT ATATCAAATC TTTTAA

**AdhE2.44 (76973)**

1 ATGAAAGTGA CGAACCAAAA AGAACTGAAA CAAAAACTGA ATGAACTGCG TGAGGCCAG  
61 AAAAAGTTCA ACACGTATAC CCAGGAGCAA GTTGACAAGA TCTTCAAACA GTGTGCCATT  
121 GCGGCTGCCA AAGAGCGTAT TAACTTGGCC AAAGTGGCGG TGGAAGAAAC CGGCATCGGT  
181 CTGGTCGAGG ACAAGATTAT CAAGAATCAC TTTGCCGCGG AGTATATCTA CAACAAATAC  
241 AAAAACGAAA AGACTTGGCG CATCATTTGAT CATGATGACA GCTTGGGTAT CACGAAAGTC  
301 GCAGAACCAA TCGGTATTGT CGCGGCAATT GTCCCGACCA CTAATCCGAC CAGCACCGCG  
361 ATCTTCAAGA GCTTGATCAG CCTGAAAACC CGCAACGCGA TTTTCTTCAG CCCGACCCCG  
421 CGTGCGAAGA AGAGCACCAT CGCAGCGGCG AAGCTGATTT TGGATGCCGC GGTAAAGGCC  
481 GGTGCACCGA AAAACATTAT TGGCTGGATT GACGAGCCGA GCATTGAGCT GTCTCAGGAC  
541 CTGATGAGCG AAGCGGACAT TATTCTGGCC ACCGGTGGTC CGTCTATGGT TAAGGCAGCG  
601 TACTCCAGCG GTAAGCCTGC TATCGGCGTT GTGCGGGCA ATACGCCGCG TATCATCGAT  
661 GAAAGCGCGG ATATTGATAT GGCAGTTAGC TCCATCATTC TGTCAAAAC CTACGACAAT  
721 GGTGTTATCT TTGCAAGCGA GCAAAGCATC CTGGTGATGA ATAGCATTTA CGAGAAGGTC  
781 AAAGAAAGTGT TTGTTAAGCG TGGTTCCTAT ATTCTGAACC AGAACGAGAT TGCAAAAATC  
841 AAAGAAACGA TGTTTAAGAA TGGCGCGATT AATGCAGATA TTGTTGGTAA GTCCGCATAC  
901 ATTATCGCGA AGATGGCGGG TATCGAAGTG CCGCAAACCA CCAAATCTT GATCGGCGAA  
961 GTGCAGCACG TGGAGAAGAG CGAACTGTTC AGCCATGAGA AACTGAGCCC GGTTCCTGGCT  
1021 ATGTACAAAG TGAAGGACTT TGACGAAGCC CTGAAGAAAG CTCAGCGTCT GATTGAGCTG  
1081 GGCGGCAGCG GTCACACGAG CAGCCTGTAT ATCGATAGCC AAAACAATAA GGACAAGGTG  
1141 AAAGAGTTTC GTCTGGCGAT GAAAACCTCT CGCACGTTTA TCAACATGCC GAGCAGCCAA  
1201 GGTGCGAGCG GCGATCTGTA TAACTTCGCA ATCGCGCCTT CTTTTACGCT GGGTTGCGGT  
1261 ACCTGGGGCG GTAATTCGGT GAGCCAGAAT GTCGAGCCGA AGCACCTGCT GAACATCAAA  
1321 TCGGTGCGCG GTCGCCGTGA GAAGAGACCG TGGTTCAAAG TCCCACAGAA AATTTACTTC  
1381 AAATACGGCT GCCTGCGTTT CGCGCTGAAA GAACTGAAAG ACATGAACAA AAAGCGTGCG  
1441 TTCATTGTTA CCGACAAAGA CCTGTTCAAA CTGGGTTACG TGAACAAAAT CACCAAAGTT  
1501 CTGGATGAAA TTGACATCAA GTACTCCATC TTCACTGATA TCAAATCCGA CCCAACGATT  
1561 GATAGCGTGA AAAAGGGCGC TAAAGAAATG CTGAACTTTG AACCGGACAC CATCATCAGC  
1621 ATCGGTGGTG GCTCTCCTAT GGATGCTGCG AAGGTCTATG ACCTGCTGTA CGAATACCCG  
1681 GAAGCGGAAA TCGAAAACCT GGCTATCAAC TTCATGGACA TCCGCAAACG TATCTGCAAC  
1741 TTCCCGAAGC TGGGCACTAA AGCTATTTCC GTTGCCATCC CGACTACCGC GGGCACTGGT  
1801 TCCGAAGCCA CGCCGTTGCG CGTGATCACC AACGATGAAA CCGGTATGAA ATACCCGCTG  
1861 ACCTCTTACG AACTGACCCC GAACATGGCA ATTATCGACA CCGAGCTGAT GCTGAACATG  
1921 CCGCGCAAGC TGACCGCTGC TACCGGCATC GACGCTCTGG TACATGCTAT TGAGGCGTAC  
1981 GTTTCGGTGA TGGCTACCGA TTACACCGAC GAACTGGCCC TCGGTGCGAT CAAAATGATT

|      |             |            |            |            |            |            |
|------|-------------|------------|------------|------------|------------|------------|
| 2041 | TTCAAGTACC  | TGCCTCGCGC | TTACAAAAAC | GGCACGAATG | ACATCGAGGC | GCGTGAGAAA |
| 2101 | ATGGCCCATG  | CAAGCAACAT | CGCGGGCATG | GCCTTCGCCA | ACGCGTTCCT | GGGCGTGTGC |
| 2161 | CACCTATGCG  | CTCACAAACT | GGGTGCTATG | CACCACGTGC | CGCACGGTAT | CGCGTGTGCT |
| 2221 | CTCCTGATGG  | AAGAAGTAAT | TAAGTACAAC | GCTACTGATT | GCCCCACTAA | ACAGACCGCC |
| 2281 | TTCCACACAGT | ACAAATCTCC | TAACGCTAAA | CGTAAGTACG | CTGAGATCGC | CGAATACCTG |
| 2341 | AACCTGAAGG  | GTACGAGCGA | CACTGAGAAA | GTTACTGCGC | TGATCGAAGC | TATCTCTAAA |
| 2401 | CTGAAAATTG  | ACCTGTCCAT | CCCGCAGAAC | ATCAGCGCCG | CAGGCATCAA | CAAAAAGGAC |
| 2461 | TTTTACAACA  | CGCTGGACAA | AATGAGCGAA | CTGGCTTTTG | ACGACCAGTG | CACCACTGCA |
| 2521 | AACCCGCGTT  | ACCCGCTGAT | CTCTGAGCTG | AAAGACATTT | ATATCAAATC | TTTTTAA    |

**AdhE2.45 (76974)**

|      |             |             |             |            |            |            |
|------|-------------|-------------|-------------|------------|------------|------------|
| 1    | ATGAAAGTGA  | CGAACCAAAA  | AGAAGTAAAA  | CAAAAAGACA | ATGAACTGCG | TGAGGCCAG  |
| 61   | AAAAAGTTCG  | CTACGTATAC  | CCAGGAGCAA  | GTTGACAAGA | TCTTCAAACA | GTGTGCCATT |
| 121  | GCGGCTGCCA  | AAGAGCGTAT  | TAAGTGGCCG  | AAACTGGCCG | TGGAAGAAAC | CGGCATCGGT |
| 181  | CTGGTGCAGG  | ACAAGATTAT  | CAAGAATCAC  | TTTGCCGCGG | AGTATATCTA | CAACAAATAC |
| 241  | AAAAACGAAA  | AGACTTGC    | CATCATTGAT  | CATGATGACA | GCTTGGGTAT | CACGAAAGTC |
| 301  | GCAGAACCAA  | TCGGTATTGT  | CGCGGCAATT  | GTCCCGACCA | CTAATCCGAC | CAGCACC    |
| 361  | ATCTTCAAGA  | GCTTGATCAG  | CCTGAAAACC  | CGCAACGCGA | TTTTCTTCAG | CCCGCACCCG |
| 421  | CGTGCGAAGA  | AGAGCACCAT  | CGCAGCGCGG  | AAGCTGATTT | TGGATGCCCG | GGTAAAGGCC |
| 481  | GGTGACCCGA  | AAAACATTAT  | TGGCTGGATT  | GACGAGCCGA | GCATTGAGCT | GTCTCAGGAC |
| 541  | ATGATGAGCG  | AAGCGGACAT  | TATCTGGCCG  | ACCGGTGGTC | CGTCTATGGT | TAAGGCAGCG |
| 601  | TACTCCAGCG  | GTAAGCCTGC  | TATCGCGGTT  | GGTGC      | ATACGCCGCG | TATCATCGAT |
| 661  | GAAAGCGCGG  | ATATTGATAT  | GGCAGTTAGC  | TCCATCATTC | TGTCCAAAAC | CTACGACAAT |
| 721  | GGTGTATCT   | GTGCAAGCGA  | GCAAAGCATC  | CTGGTGATGA | ATAGCATTTA | CGAGAAGGTC |
| 781  | AAAGAAGAGT  | TTGTTAAGCG  | TGGTTCCTAT  | ATCTGAACC  | AGAACGCGAT | TGCAAAAATC |
| 841  | AAAGAAACGA  | TGTTAAGAA   | TGGCGCGATT  | AATGCAGATA | TTGTTGGTAA | GTCCGCATAC |
| 901  | ATTATCGCGA  | AGATGGCGGG  | TATCGAAGTG  | CCGCAAACCA | CCAAAATCTT | GATCGGCGAA |
| 961  | GTGCAGAGCG  | TGGAGAAGAG  | CGAACTGTTT  | AGCCATGAGA | AACTGAGCCC | GGTCTGGCT  |
| 1021 | ATGTACAAAG  | GTAAGCCTGC  | TGACGAAGCC  | CTGAAGAAAG | CTCAGCGTCT | GATTGAGCTG |
| 1081 | GCGGCGAGCG  | GTACACAGAG  | CAGCCTGTAT  | ATCGATAGCC | AAAAACAATA | GGACAAGGTG |
| 1141 | AAAGAGTTCG  | GTCTGGCGAT  | GAAAACCTCT  | CGCACGTTTA | TCAACATGCC | GAGCAGCCAA |
| 1201 | GGTGCAGAGCG | GCGATCTGTA  | TAAGTTCGCA  | ATCGCGCCTT | CTTTTACGCT | GGGTTGCGGT |
| 1261 | ACCTGGGGCG  | GTAATTTCGGT | GAGCCAGAAT  | GTGAGCCGA  | AGCACCTGCT | GAACATCAAA |
| 1321 | TCGGTGC     | AGCGCCGTTG  | GAAGAGACCG  | TGGTTCAAAG | TCCCACAGAA | AATTTACTTC |
| 1381 | AAATACGGCT  | GCCTGCGTTT  | CGCGTGA     | GAAGTGAAG  | ACATGAACAA | AAAGCGTGC  |
| 1441 | TTCATTGTTA  | CCGACAAAGA  | CCTGTTCAAA  | CTGGGTTACG | TGAACAAAAT | CACCAAAGTT |
| 1501 | CTGGATGAAA  | TTGACATCAA  | GTAAGTCCATC | TTCATGATA  | TCAAATCCGA | CCCAACGATT |
| 1561 | GATAGCGTGA  | AAAAGGGCGC  | TAAAGAAATG  | CTGAACTTTG | AACCGGACAC | CATCATCAGC |
| 1621 | ATCGTGGTGT  | GCTCTCCTAT  | GGATGCTGCG  | AAGGTCATGC | ACCTGCTGTA | CGAATACCCG |
| 1681 | GAAGCGGAAA  | TCGAAAACCT  | GGCTATCAAC  | TTCATGGACA | TCCGCAAACG | TATCTGCAAC |
| 1741 | TTCCGAAGC   | TGGGCACTAA  | AGCTATTTCC  | GTTGCCATCC | CGACTACCGC | GGGCACTGGT |
| 1801 | TCCGAAGCCA  | CGCGTTCGCG  | CGTGATCACC  | AACGATGAAA | CCGGTATGAA | ATACCCGCTG |
| 1861 | ACCTCTTACG  | AACTGACCCC  | GAACATGGCA  | ATTATCGACA | CCGAGCTGAT | GCTGAACATG |
| 1921 | CCGCGCAAGC  | TGACCGCTGC  | TACCGGCATC  | GACGCTCTGG | TACATGCTAT | TGAGGCGTAC |
| 1981 | GTTTCCGTGA  | TGGTACC     | TTACACCGAC  | GAAGTGGCCC | TGCGTGC    | CAAAATGATT |
| 2041 | TTCAAGTACC  | TGCCTCGCGC  | TTACAAAAAC  | GGCACGAATG | ACATCGAGGC | GCGTGAGAAA |
| 2101 | ATGGCCCATG  | CAAGCAACAT  | CGCGGGCATG  | GCCTTCGCCA | ACGCGTTCCT | GGGCGTGTGC |
| 2161 | CACCTATGCG  | CTCACAAACT  | GGGTGCTATG  | CACCACGTGC | CGCACGGTAT | CGCGTGTGCT |
| 2221 | GTCCTGATCG  | AAGAAGTAAT  | TAAGTACAAC  | GCTACTGATT | GCCCCACTAA | ACAGACCGCC |
| 2281 | TTCCACACAGT | ACAAATCTCC  | TAACGCTAAA  | CGTAAGTACG | CTGAGATCGC | CGAATACCTG |
| 2341 | AACCTGAAGG  | GTACGAGCGA  | CACTGAGAAA  | GTTACTGCGC | TGATCGAAGC | TATCTCTAAA |
| 2401 | CTGAAAATTG  | ACCTGTCCAT  | CCCGCAGAAC  | ATCAGCGCCG | CAGGCATCAA | CAAAAAGGAC |
| 2461 | TTTTACAACA  | CGCTGGACAA  | AATGAGCGAA  | CTGGCTTTTG | ACGACCAGTG | CACCACTGCA |
| 2521 | AACCCGCGTT  | ACCCGCTGAT  | CTCTGAGCTG  | AAAGACATTT | ATATCAAATC | TTTTTAA    |

**AdhE2.46 (76975)**

|     |            |            |            |            |            |            |
|-----|------------|------------|------------|------------|------------|------------|
| 1   | ATGAAAGTGA | CGAACCAAAA | AGAAGTAAAA | CAAAAAGTGA | ATGAACTGCG | TGAGGCCAG  |
| 61  | AAAAAGTTCG | CTACGTATAC | CCAGGCGCAA | GTTGACAAGA | TCTTCAAACA | GTGTGCCATT |
| 121 | GCGGCTGCCA | AATACCGTAT | TAAGTGGCCG | AAACTGGCCG | TGGAAGAAAC | CGGCATCGGT |
| 181 | CTGGTGCAGG | ACAAGATTAT | CAAGAATCAC | TTTGCCGCGG | AGTATATCTA | CAACAAATAC |
| 241 | AAAAACGAAA | AGACTTGC   | CATCATTGAT | CATGATGACA | GCTTGGGTAT | CACGAAAGTC |
| 301 | GCAGAACCAA | TCGGTATTGT | CGCGGCAATT | GTCCCGACCA | CTAATCCGAC | CAGCACC    |

361 ATCTTCAAGA GCTTGATCAG CCTGAAAACC CGCAACGCGA TTTTCTTCAG CCCGCACCCG  
421 CGTGCGAAGA AGAGCACCAT CGCAGCGGCG AAGCTGATTT TGGATGCCGC GGTTAAGGCC  
481 GGTGCACCGA AAAACATTAT TGGCTGGATT GACGAGCCGA GCATTGAGCT GTCTCAGGAC  
541 CTGATGAGCG AAGCGGACAT TATTCTGGCC ACCGGTGGTC CGTCTATGGT TAAGGCAGCG  
601 TACTCCAGCG GTAAGCCTGC TATCGGCGTT GGTGCGGGCA ATACGCCGGC TATCATCGAT  
661 GAAAGCGCGG ATATTGATAT GGCAGTTAGC TCCATCATTC TGTCCAAAAC CTACGACAAT  
721 GGTGTTATCT GTGCAAGCGA GCAAAGCATC CTGGTGATGA ATAGCATTTA CGAGAAGGTC  
781 AAAGAGAGT TTGTTAAGCG TGGTTCCTAT ATTCTGAACC AGAACGAGAT TGCAAAAATC  
841 AAAGAAACGA TGTTAAGAA TGGCGCGATT AATGCAGATA TTGTTGGTAA GTCCGCATAC  
901 ATTATCGCGA AGATGGCGGG TATCGAAGTG CCGCAAACCA CCAAATCTT GATCGGCGAA  
961 GTGCAGAGCG TGGAGAAGAG CGAACTGTTT AGCCATGAGA AACTGAGCCC GGTTCGGCT  
1021 ATGTACAAAG TGAAGGACTT TGACGAAGCC CTGAAGAAAG CTCAGCGTCT GATTACCTG  
1081 GGCGGCAGCG GTCACACGAG CAGCCTGTAT ATCGATAGCC AAAACAATAA GGACAAGGTG  
1141 AAAGAGTTCG GTCTGGCGAT GAAAACCTCT CGCACGTTTA TCAACATGCC GAGCAGCCAA  
1201 GGTGCGAGCG GCGATCTGTA TAACTTCGCA ATCGCGCCTT CTTTTACGCT GGGTTGCGGT  
1261 ACCTGGGGCG GTAATTCTGGT GAGCCAGAAT GTCGAGCCGA AGCACCTGCT GAACATCAAA  
1321 TCGGTCGCGG AGCGCCGTGA GAAGAGACCG TGGTTCAAAG TCCCACAGAA AATTTACTTC  
1381 AAATACGGCT GCCTGCGTTT CGCGTGAAA GAACTGAAAG ACATGAACAA AAAGCGTGCG  
1441 TTCATTGTTA CCGACAAAAGA CCTGTTCAAA CTGGGTTACG TGAACAAAAT CACCAAAGTT  
1501 CTGGATGAAA TTGACATCAA GTACTCCATC TTCACTGATA TCAAATCCGA CCCAACGATT  
1561 GATAGCGTGA AAAAGGGCGC TAAAGAAATG CTGAACTTTG AACCGGACAC CATCATCAGC  
1621 ATCGTGGTGT GCTCTCCTAT GGATGCTGCG AAGGTCATGC ACCTGCTGTA CGAATACCCG  
1681 GAAGCGGAAA TCGAAAACCT GGCTATCAAC TTCATGGACA TCCGCAAACG TATCTGCAAC  
1741 TTCCCGAAGC TGGGCACTAA AGCTATTTCC GTTGCCATCC CGACTACCGC GGGCATTGGT  
1801 TCCGAAGCCA CGCGTTCGC CGTATCACC AACGATGAAA CCGGTATGAA ATACCCGCTG  
1861 ACCTCTTACG AACTGACCCC GAACATGGCA ATTATCGACA CCGAGCTGAT GCTGAACATG  
1921 CCGCGCAAGC TGACCGCTGC TACCGGCATC GACGCTCTGG TACATGCTAT TGAGGCGTAC  
1981 GTTTCGCTGA TGGTACCGA TTACACCGAC GAACTGGCCC TCGGTGCGAT CAAAATGATT  
2041 TTCAAGTACC TGCCTCGCGC TTACAAAAAC GGCACGAATG ACATCGAGGC GCGTGAGAAA  
2101 ATGGCCCATG CAAGCAACAT CGCGGGCATG GCCTTCGCCA ACGCGTTCCT GGGCGTGTGC  
2161 CACTCTATGG CTCACAAACT GGGTGCTATG CACCACGTGC CGCACGGTAT CGCGTGTGCT  
2221 GTCCTAGTCG AAGAAGTAAT TAAGTACAAC GCTACTGATT GCCCGACTAA ACAGACCGCC  
2281 TTCCACAGT ACAAACTCTC TAACGCTAAA CGTAAGTACG CTGAGATCGC CGAATACCTG  
2341 AACCTGAAGG GTACGAGCGA CACTGAGAAA GTTACTGCGC TGATCGAAGC TATCTCTAAA  
2401 CTGAAAATTG ACCTGTCCAT CCCGAGAAGC ATCAGCGCCG CAGGCATCAA CAAAAGGAC  
2461 TTTTACAACA CGCTGGACAA AATGAGCGAA CTGGCTTTTG ACGACCAGTG CACCACTGCA  
2521 AACC CGGTT ACCCGCTGAT CTCTGAGCTG AAAGACATTT ATATCAAATC TTTTAA

**AdhE2.47 (76976)**

1 ATGAAAGTGA CGAACCAAAA AGAACTGAAA CAAAAACTGA ATGAACTGCG TGAGGCCCGAG  
61 AAAAAGTTCG CTACGTATAC CCAGGAGCAA GTTGACAAGA TCTTCAAACA GTGTGCCATT  
121 CCGGTCGCCA AAGAGCGTAT TAACTTGCC AAAGTGGCGG TGAAGAAAC CGGCATCGGT  
181 CTGGTCGAGG ACAAGATTAT CAAGAATCAC TTTGCCGCGG AGTATATCTA CAACAAATAC  
241 AAAACGGTA AGACTTGCGG CATCATTGAT CATGATGACA GCTTGGGTAT CACGAAAGTC  
301 GCAGAACCAA TCGGTATTGT CGCGCAATT GTCCCGACCA CTAATCCGAC CAGCACCAGC  
361 ATCTTCAAGA GCTTGATCAG CCTGAAAACC CGCAACGCGA TTTTCTTCAG CCCGCACCCG  
421 CGTGCGAAGA AGAGCACCAT CGCAGCGGCG AAGCTGATTT TGGATGCCGC GGTTAAGGCC  
481 GGTGCACCGA AAAACATTAT TGGCTGGATT GACGAGCCGA GCATTGAGCT GTCTCAGGAC  
541 CTGATGAGCG AAGCGGACAT TATTCTGGCC ACCGGTGGTC CGTCTATGGT TAAGGCAGCG  
601 TACTCCAGCG GTAAGCCTGC TATCGGCGTT GGTGCGGGCA ATACGCCGGC TATCATCGAT  
661 GAAAGCGCGG ATATTGATAT GGCAGTTAGC TCCATCATTC TGTCCAAAAC CTACGACAAT  
721 GGTGTTATCT GTGCAAGCGA GCAAAGCATC CTGGTGATGA ATAGCATTTA CGAGAAGGTC  
781 AAAGCGGAGT TTGTTAAGCG TGGTTCCTAT ATTCTGAACC AGAACGAGAT TGCAAAAATC  
841 AAAGAAACGA TGTTAAGAA TGGCGCGATT AATGCAGATA TTGTTGGTAA GTCCGCATAC  
901 ATTATCGCGA AGATGGCGGG TATCGAAGTG CCGCAAACCA CCAAATCTT GATCGGCGAA  
961 GTGCAGAGCG TGGAGAAGAG CGAACTGTTT AGCCATGAGA AACTGAGCCC GGTTCGGCT  
1021 ATGTACAAAG TGAAGGACTT TGACGAAGCC CTGGACAAAG CTCAGCGTCT GATTGAGCTG  
1081 GGCGGCAGCG GTCACACGAG CAGCCTGTAT ATCGATAGCC AAAACAATAA GGACAAGGTG  
1141 AAAGAGTTCG GTCTGGCGAT GAAAACCTCT CGCACGTTTA TCAACATGCC GAGCAGCCAA  
1201 GGTGCGAGCG GCGATCTGTA TAACTTCGCA ATCGCGCCTT CTTTTACGCT GGGTTGCGGT  
1261 ACCTGGGGCG GTAATTCTGGT GAGCCAGAAT GTCGAGCCGA AGCACCTGCT GAACATCAAA  
1321 TCGGTCGCGG AGCGCCGTGA GAAGAGACCG TGGTTCAAAG TCCCACAGAA AATTTACTTC

|      |             |            |            |             |             |            |
|------|-------------|------------|------------|-------------|-------------|------------|
| 1381 | AAATACGGCT  | GCCTGCGTTT | CGCGCTGAAA | GAAGTAAAAG  | ACATGAACAA  | AAAGCGTGCG |
| 1441 | TTCATTGTTA  | CCGACAAAGA | CCTGTTCAAA | CTGGGTTACG  | TGAACAAAAT  | CACCAAAGTT |
| 1501 | CTGGATGAAA  | TTGACATCAA | GTACTCCATC | TTCATGATA   | TCAAATCCGA  | CCCAACGATT |
| 1561 | GATAGCGTGA  | AAAAGGGCGC | TAAAGAAATG | CTGAACTTTG  | AACCGGACAC  | CATCATCAGC |
| 1621 | ATCGGTGGTG  | GCTCTCCTAT | GGATGCTGCG | AAGGTCATGC  | ACCTGCTGTA  | CGAATACCCG |
| 1681 | GAAGCGGAAA  | TCGAAAACCT | GGCTATCAAC | TTCATGGACA  | TCCGCAAACG  | TATCTGCAAC |
| 1741 | TTCCCGAAGC  | TGGGCACTAA | AGCTATTTCC | GTTGCCATCC  | CGACTACCGC  | GGGCACTGGT |
| 1801 | TCCGAAGCCA  | CGCCGTTCGC | CGTGATCACC | AACGATGAAA  | CCGGTATGAA  | ATACCCGCTG |
| 1861 | ACCTTTACG   | AACTGACCCC | GAACATGGCA | ATTATCGACA  | CCGAGCTGAT  | GCTGAACATG |
| 1921 | CCGCGCAAGC  | TGACCGCTGC | TACCGGCATC | GACGCTCTGG  | TACATGCTAT  | TGAGGCGTAT |
| 1981 | TTTTCCGTGA  | TGGCTACCGA | TTACACCGAC | GAAGTGGCCC  | TGCGTGCATG  | CAAAATGATT |
| 2041 | TTCAAGTACC  | TGCCCTCGCG | TTACAAAAAC | GGCACGAATG  | ACATCGAGGC  | GCGTGAGAAA |
| 2101 | ATGGCCCATG  | CAAGCAACAT | CGCGGGCATG | GCCTTCGCCA  | ACGCGTTCCCT | GGGCGTGTGC |
| 2161 | CACTCTATGG  | CTCACAAACT | GGGTGCTATG | CACCACGTGC  | CGCACGGTAT  | CGCGTGTGCT |
| 2221 | GTCCGTGATC  | AAGAAGTAAT | TAAGTACAAC | GCTACTGATT  | GCCCAGACTAA | ACAGACCGCC |
| 2281 | TTCCACAGT   | ACAAATCTCC | TAACGCTAAA | CGTAAGTACG  | CTGAGATCGC  | CGAATACCTG |
| 2341 | AACCTGAAGG  | GTACGAGCGA | CACTGAGAAA | GTTACTGCGC  | TGATCGAAGC  | TATCTCTAAA |
| 2401 | CTGAAAATTG  | ACCTGTCCAT | CCGCAGAAC  | ATCAGCGCCG  | CAGGCATCAA  | CAAAAAGGAC |
| 2461 | TTTTTACAACA | CGCTGGACAA | AATGAGCGAA | CTGGCTTTTTG | ACGACCAGTG  | CACCACTGCA |
| 2521 | AACCCGCGTT  | ACCCGCTGAT | CTCTGAGCTG | AAAGACATTT  | ATATCAAATC  | TTTTTAA    |

**AdhE2.48 (76977)**

|      |            |             |             |            |             |            |
|------|------------|-------------|-------------|------------|-------------|------------|
| 1    | ATGAAAGTGA | CGAACCAAAA  | AGAAGTAAA   | CAAAAAGTGA | ATGAAAGTGG  | TGAGGCCCG  |
| 61   | AAAAAGTTTC | CTACGTATAC  | CCAGGAGCAA  | GTTGACAAGA | TCTTCAAACA  | GTGTGCCATT |
| 121  | GCGGCTGCCA | AACTGCGTAT  | TAAGTTGGCC  | GAGCTGGCGG | TGGAAGAAAC  | CGGCATCGGT |
| 181  | CTGGTTCGAG | ACAAGATTAT  | CAAGAATCAC  | TTTGCCGCGG | AGTATATCTA  | CAACAAATAC |
| 241  | AAAAACGAAA | AGACTTGCGG  | CATCATTGAT  | CATGATGACA | GCTTGGGTAT  | CACGAAAGTC |
| 301  | GCAGAACCAA | TCGGTATTGT  | CGCGGCAATT  | GTCCCGACCA | CTAATCCGAC  | CAGCACCGCG |
| 361  | ATCTTCAAGA | GCTTGATCAG  | CCTGAAAACC  | CGCAACGCGA | TTTTCTTCAG  | CCCGCACCCG |
| 421  | CGTGCGAAGA | AGAGCACCAT  | CGCAGCGGCG  | AAGCTGATTT | TGGATGCCGC  | GGTTAAGGCC |
| 481  | GGTGCACCGA | AAAACATTAT  | TGGCTGGATT  | GACGAGCCGA | GCATTGAGCT  | GTCTCAGGAC |
| 541  | CTGATGAGCG | AAGCGGACAT  | TATCTGGGCC  | ACCGGTGGTC | CGTCTATGGT  | TAAGGCAGCG |
| 601  | TACTCCAGCG | GTAAGCCTGC  | TATCGGCGTT  | GGTGCGGGCA | ATACGCCGGC  | TATCATCGAT |
| 661  | GAAAGCGCGG | ATATTGATAT  | GGCAGTTAGC  | TCCATCATT  | TGTCCAAAAC  | CTACGACAAT |
| 721  | GGTGTATCT  | GTGCAAGCGA  | GCAAAGCATC  | CTGGTGTGTA | ATAGCATTTA  | CGAGAACGTC |
| 781  | AAAGAAAGT  | TTGTTAAGCG  | TGGTTCCCTAT | ATTCTGAACC | AGAACGAGAT  | TGCAAAAATC |
| 841  | AAAGAAACGA | TGTTAAGAA   | TGGCGCGATT  | AATGCAGATA | TTGTTGGTAA  | GTCCGCATAC |
| 901  | ATTATCGCGA | AGATGGCGGG  | TATCGAAGTG  | CCGCAAACCA | CCAAAATCTT  | GATCGGCGAA |
| 961  | GTGCAGAGCG | TGGAGAAGAG  | CGAACTGTTC  | AGCGTTGAGA | AACTGAGCCC  | GGTTCTGGCT |
| 1021 | ATGTACAAAG | TGAAGGACTT  | TGACGAAGCC  | CTGAAGAAAG | CTCAGCGTCT  | GATTGAGCTG |
| 1081 | GGCGGCAGCG | GTACACAGAG  | CAGCCTGTAT  | ATCGATAGCC | AAAACAATAA  | GGACAAGGTG |
| 1141 | AAAGAGTTTC | GTCTGGCGAT  | GAAAAGTCTC  | CGCACGTTTA | TCAACATGCC  | GAGCAGCCAA |
| 1201 | GGTGCAGAGC | GCGATCTGTA  | TAAGTTTCGCA | ATCGCGCCTT | CTTTTACGCT  | GGGTTGCGGT |
| 1261 | ACCTGGGGCG | GTAATTTCGGT | GAGCCAGAAT  | GTCGAGCCGA | AGCACCTGCT  | GAACATCAAA |
| 1321 | TCGGTTCGCG | AGCGCCGTGA  | GAAGAGACCG  | TGTTTCAAAG | TCCCACAGAA  | AATTTACTTC |
| 1381 | AAATACGGCT | GCCTGCGTTT  | CGCGCTGAAA  | GAAGTAAAAG | ACATGAACAA  | AAAGCGTGCG |
| 1441 | TTCATTGTTA | CCGACAAAGA  | CCTGTTCAAA  | CTGGGTTACG | TGAACAAAAT  | CACCAAAGTT |
| 1501 | CTGGATGAAA | TTGACATCAA  | GTACTCCATC  | TTCATGATA  | TCAAATCCGA  | CCCAACGATT |
| 1561 | GATAGCGTGA | AAAAGGGCGC  | TAAAGAAATG  | CTGAACTTTG | AACCGGACAC  | CATCATCAGC |
| 1621 | ATCGGTGGTG | GCTCTCCTAT  | GGATGCTGCG  | AAGGTCATGC | ACCTGCTGTA  | CGAATACCCG |
| 1681 | GAAGCGGAAA | TCGAAAACCT  | GGCTATCAAC  | TTCATGGACA | TCCGCAAACG  | TATCTGCAAC |
| 1741 | TTCCCGAAGC | TGGGCACTAA  | AGCTATTTCC  | GTTGCCATCC | CGACTACCGC  | GGGCACTGGT |
| 1801 | TCCGAAGCCA | CGCCGTTCGC  | CGTGATCACC  | AACGATGAAA | CCGGTATGAA  | ATACCCGCTG |
| 1861 | ACCTCTTACG | AACTGACCCC  | GAACATGGCA  | ATTATCGACA | CCGAGCTGAT  | GCTGAACATG |
| 1921 | CCGCGCAAGC | TGACCGCTGC  | TACCGGCATC  | GACGCTCTGG | TACATGCTAT  | TGAGGCGTAT |
| 1981 | TTTTCCGTGA | TGGCTACCGA  | TTACACCGAC  | GAAGTGGCCC | TGCGTGCATG  | CAAAATGATT |
| 2041 | TTCAAGTACC | TGCCCTCGCG  | TTACAAAAAC  | GGCACGAATG | ACATCGAGGC  | GCGTGAGAAA |
| 2101 | ATGGCCCATG | CAAGCAACAT  | CGCGGGCATG  | GCCTTCGCCA | ACGCGTTCCCT | GGGCGTGTGC |
| 2161 | CACTCTATGG | CTCACAAACT  | GGGTGCTATG  | CACCACGTGC | CGCACGGTAT  | CGCGTGTGCT |
| 2221 | GTCCGTGATC | AAGAAGTAAT  | TAAGTACAAC  | GCTACTGATT | GCCCAGACTAA | ACAGACCGCC |
| 2281 | TTCCACAGT  | ACAAATCTCC  | TAACGCTAAA  | CGTAAGTACG | CTGAGATCGC  | CGAATACCTG |
| 2341 | AACCTGAAGG | GTACGAGCGA  | CACTGAGAAA  | GTTACTGCGC | TGATCGAAGC  | TATCTCTAAA |

2401 CTGAAAATTG ACCTGTCCAT CCCGAGAAC ATCAGCGCCG CAGGCATCAA CAAAAAGGAC  
 2461 TTTTACAACA CGCTGGACAA AATGAGCGAA CTGGCTTTTG ACGACCAGTG CACCACTGCA  
 2521 AACC CGGTT ACCCGCTGAT CTCTGAGCTG AAAGACATTT ATATCAAATC TTTTAA

**AdhE2.49 (76978)**

1 ATGAAAGTGA CGAACCAAAA AGAACTGAAA CAAAAACTGA ATGAACTGCG TGAGGCCAG  
 61 AAAAAAGTTCG CTACGTGCAC CCAGGAGCAA GTTGACAAGA TCTTCAAACA GTGTGCCATT  
 121 GCGGCTGCCA AAGAGCGTAT TAACTTGGCC AAAGTGGCGG TGAAGAAAAC CGGCATCGGT  
 181 CTGGTCGAGG ACAAGATTAT CAAGAATCAC TTTGCCGCGG AGTATATCTA CAACAAATAC  
 241 AAAAAACGGTA AGACTTGGCG CATCATTGAT CATGATGACA GCTTGGGTAT CACGAAAGTC  
 301 GCAGAACCAA TCGGTATTGT CGCGCAATT GTCCGACCA CTAATCCGAC CAGCACCAGC  
 361 ATCTTCAAGA GCTTGATCAG CCTGAAAACC CGCAACGCGA TTTTCTTCAG CCCGCACCCG  
 421 CGTGCGAAGA AGAGCACCAT CGCAGCGGCG AAGCTGATTT TGGATGCCCG GGTAAAGGCC  
 481 GGTGCACCGA AAAACATTAT TGGCTGGATT GACGAGCCGA GCATTGAGCT GTCTCAGGAC  
 541 CTGATGAGCG AAGCGACAT TATTCTGGTT ACCGGTGGTC CGTCTATGGT TAAGCGAGCG  
 601 TACTCCAGCG GTAAGCCTGC TATCGGCGTT GGTGCGGGCA ATACGCCGGC TATCATCGAT  
 661 GAAAGCGCGG ATATTGATAT GGCAGTTAGC TCCATCATTG TGTCCAAAAC CTACGACAAT  
 721 GGTGTTATCT GTGCAAGCGA GCAAAGCATC CTGGTGATGA ATAGCATTTA CGAGAAGGTC  
 781 AAAGAAAGAGT TTGTTAAGCG TGGTTCCCTAT ATTCTGAACC AGAACGAGAT TGCAAAAATC  
 841 AAAGAAACGA TGTTTAAGAA TGGCGCGATT AATGCAGATA TTGTTGGTAA GTCCGCATAC  
 901 ATTATCGCGA AGATGGCGGG TATCGAAGTG CCGCAAACCA CCAAATCTT GATCGGCGAA  
 961 TTGTCAGAGCG TGGAGGCGAG CGAACTGTTC AGCCATGAGA AACTGAGCCC GGTCTGGCT  
 1021 ATGTACAAAG TGAAGGACTT TGACGAAGCC CTGAAGAAAG CTCAGCGTCT GATTGAGCTG  
 1081 GCGGCGAGCG GTCACACGAG CAGCCTGTAT ATCGATAGCC AAAACAATAA GGACAAGGTG  
 1141 AAAGAGTTCG GTCTGGCGAT GAAAACCTCT CGCACGTTTA TCAACATGCC GAGCAGCCAA  
 1201 GGTGCGAGCG GCGATCTGTA TAACTTCGCA ATCGCGCCTT CTTTTACGCT GGGTTGCGGT  
 1261 ACCTGGGGCG GTAATTCTGGT GAGCCAGAAT GTCGAGCCGA AGCACCTGCT GAACATCAA  
 1321 TCGGTGCGCG AGCGCCGTA GAAGAGACCG TGGTTCAAAG TCCCACAGAA AATTTACTTC  
 1381 AAATACGGCT GCCTGCGTTT CGCGCTGAAA GAACTGAAAAG ACATGAACAA AAAGCGTGCG  
 1441 TTCATTGTTA CCGACAAAAG CCTGTTCAAA CTGGGTTACG TGAACAAAAT CACCAAAGTT  
 1501 CTGGATGAAA TTGACATCAA GTACTCCATC TTCACTGATA TCAAATCCGA CCCAACGATT  
 1561 GATAGCGTGA AAAAGGGCGC TAAAGAAATG CTGAACTTTG AACCGGACAC CATCATCAGC  
 1621 ATCGGTGGTG GCTCTCCTAT GGATGCTGCG AAGGTCATGC ACCTGCTGTA CGAATACCCG  
 1681 GAAGCGGAAA TCGAAAACCT GGCTATCAAC TTCATGGACA TCCGCAAACG TATCTGCAAC  
 1741 TTCCGAAGC TGGGCACTAA AGCTATTTCC GTTGCCATCC CGTACCAGC GGGCTGGT  
 1801 TCCGAAGCCA CGCCGTTCCG CGTGATCACC AACGATGAAA CCGGTATGAA ATACCCGCTG  
 1861 ACCTCTTACG AACTGACCCC GAACATGGCA ATTATCGACA CCGAGCTGAT GCTGAACATG  
 1921 CCGCGCAAGC TGACCGCTGC TACCGGCATC GACGCTCTGG TACATGCTAT TGAGGCGTAC  
 1981 GTTTCCTGTA TGGTACCGA TTACACCGAC GAACTGGCCC TGCGTGCGAT CAAAATGATT  
 2041 TTCAAGTAC TGCTCGCGC TTACAAAAAC GGCACGAATG ACATCGAGGC GCGTGAGAAA  
 2101 ATGGCCCATG CAAGCAACAT CGCGGGCATG GCCTTCGCCA ACGCGTTCTT GGGCGTGTGC  
 2161 CACTCTATGG CTCACAAACT GGGTGCTATG CACCACGTGC CGCAGGATAT CGCGTGTGCT  
 2221 GTCCTGATCG AAGAAGTAAT TAAGTACAAC GCTACTGATT GCCCGACTAA ACAGACCGCC  
 2281 TTCCACAGT ACAAATCTCC TAACGCTAAA CGTAAGTACG CTGAGATCGC CGAATACCTG  
 2341 AACCTGAAGG GTACGAGCGA CACTGAGAAA GTTACTGCGC TGATCGAAGC TATCTCTAAA  
 2401 CTGAAAATTG ACCTGTCCAT CCCGAGAAC ATCAGCGCCG CAGGCATCAA CAAAAAGGAC  
 2461 TTTTACAACA CGCTGGACAA AATGAGCGAA CTGGCTTTTG ACGACCAGTG CACCACTGCA  
 2521 AACC CGGTT ACCCGCTGAT CTCTGAGCTG AAAGACATTT ATATCAAATC TTTTAA

**AdhE2.50 (76979)**

1 ATGAAAGTGA CGAACCAAAA AGAACTGAAA CAAAAAGACA ATGAACTGCG TGAGGCCAG  
 61 AAAAAAGTTCG CTACGTATAC CCAGGAGCAA GTTGACAAGA TCTTCAAACA GTGTGCCATT  
 121 GCGGCTGCCA AAGAGCGTAT TAACTTGGCC AAAGTGGCGG TGAAGAAAAC CGGCATCGGT  
 181 CTGGTCGAGG ACAAGATTAT CAAGAATCAC TTTGCCGCGG AGTATATCTA CAACAAATAC  
 241 AAAAAACGAAA AGACTTGGCG CATCATTGAT CATGATGACA GCTTGGGTAT CACGAAAGTC  
 301 GCAGAACCAA TCGGTATTGT CGCGCAATT GTCCGACCA CTAATCCGAC CAGCACCAGC  
 361 ATCTTCAAGA GCTTGATCAG CCTGAAAACC CGCAACGCGA TTTTCTTCAG CCCGCACCCG  
 421 CGTGCGAAGA AGAGCACCAT CGCAGCGGCG AAGCTGATTT TGGATGCCCG GGTAAAGGCC  
 481 GGTGCACCGA AAAACATTAT TGGCTGGATT GACGAGCCGA GCATTGAGCT GTCTCAGGAC  
 541 CTGATGAGCG AAGCGACAT TATTCTGGCC ACCGGTGGTC CGTCTATGGT TAAGCGAGCG  
 601 TACTCCAGCG GTAAGCCTGC TATCGGCGTT GGTGCGGGCA ATACGCCGGC TATCATCGAT  
 661 GAAAGCGCGG ATATTGATAT GGCAGTTAGC TCCATCATTG TGTCCAAAAC CTACGACAAT

721 GGTGTTATCT GTGCAAGCGA GCAAAGCATC CTGGTGATGA ATAGCATTTA CGAGAAGGTC  
781 AAAGAAGAGT TTGTTAAGCG TGGTTCCTAT ATTCTGAACC AGAACGAGAT TGCAAAAATC  
841 AAAGAAACGA TGTTAAGAA TGGCGCGATT AATGCAGATA TTGTTGGTAA GTCCGCATAC  
901 ATTATCGCGA AGATGGCGGG TATCGAAGTG CCGCAAACCA CCAAATCTT GATCGGCGAA  
961 GTGCAGAGCG TGGAGAAGAG CGAACTGTTT AGCCATGAGA AACTGAGCCC GGTCTGGCT  
1021 ATGTACAAAG TGAAGGACTT TGACGAAGCC CTGAAGAAAG CTGAGCGTCT GATTGAGCTG  
1081 GGCGGCAGCG GTCACACGAG CAGCCTGTAT ATCGATAGCC AAAACAATAA GGACAAGGTG  
1141 AAAGAGTTCG GTCTGGCGAT GAAAACCTCT CGCACGTTTA TCAACATGCC GAGCAGCCAA  
1201 GGTGCGAGCG GCGATCTGTA TAACTTCGCA ATCGCGCCTT CTTTTACGCT GGGTTGCGGT  
1261 ACCTGGGGCG GTAATTCGGT GAGCCAGAAT GTCGAGCCGA AGCACCTGCT GAACATCGTT  
1321 TCGTTCGCGG AGCCGCTGA GAAGAGACCG TGGTTCAAAG TCCCACAGAA AATTTACTTC  
1381 AAATACGGCT GCCTGCGTTT CGCGCTGAAA GAACTGAAAG ACATGAACAA AAAGCGTGCG  
1441 TTCATTGTTA CCGACAAAGA CCTGTTCAAA CTGGGTTACG TGAACAAAAT CACCAAAGTT  
1501 CTGGATGAAA TTGACATCAA GTACTCCATC TTCACTGATA TCAAATCCGA CCCAACGATT  
1561 GATAGCGTGA AAAAGGGCGC TAAAGAAATG CTGAACTTTG AACCGGACAC CATCATCAGC  
1621 ATCGGTGGTG GCTCTCCTAT GGATGCTGCG AAGGTCATGC ACCTGCTGTA CGAATACCCG  
1681 GAAGCGGAAA TCGAAAACCT GGCTATCAAC TTCATGGACA TCCGAAACG TATCTGCAAC  
1741 TTCCGGAAGC TGGGCACTAA AGCTATTTCC GTTGCCATCC CGACTACCGG GGGCACTGGT  
1801 TCCGAAGCCA CGCCGTTGCG CGTGATCACC AACGATGAAA CCGGTATGAA ATACCCGCTG  
1861 ACCTCTTACG AACTGACCCC GAACATGGCA ATTATCGACA CCGAGCTGAT GCTGAACATG  
1921 CCGCGCAAGC TGACCGCTGC TACCGGCATC GACGCTCTGG TACATGCTAT TGAGGCGTAC  
1981 GTTTCGCGTA TGGTACCGA TTACACCGAC GAACTGGCCC TGCGTGCGAT CAAAATGATT  
2041 TTCAAGTACC TGCCCTGCGC TTACAAAAAT GGCACGAATG ACATCGAGGC GCGTGAGAAA  
2101 ATGGCCCATG CAAGCAACAT CGCGGGCATG GCCTTCGCCA ACGCGTTCCT GGGCGTGTGC  
2161 CACTCTATGG CTCACAAACT GGTGCTATAG CACCACGTGC CGCACGGTAT CGCGTGTGCT  
2221 GTCCTGATCG AAGAAGTAAT TAAGTACAAC GCTACTGATT GCCCGACTAA ACAGACCGCC  
2281 TTCCACAGT ACAAATCTCC TAACGCTAAA CGTAAGTACG CTGAGATCGC CGAATACCTG  
2341 AACCTGAAGG GTACGAGCGA CACTGAGAAA GTTACTGCGC TGATCGAAGC TATCTCTAAA  
2401 CTGAAAATTG ACCTGTCCAT CCCGAGAAC ATCAGCGCCG CAGGCATCAA CAAAAAGGAC  
2461 TTTTACAACA CGCTGGACAA AATGAGCGAA CTGGCTTTTG ACGACCAGTG CACCACTGCA  
2521 AACCCGCGTT ACCCGCTGAT CTCTGAGCTG AAAGACATTT ATATCAAATC TTTTTAA

**AdhE2.51 (76980)**

1 ATGAAAGTGA CGAACCAAAA AGAACTGAAA CAAAAACTGA ATGAACTGCG TGAGGCCGAG  
61 AAAAAAGTTCG CTACGTATAC CCAGGCGCAA GTTGACAAGT TCTTCAAACA GTGTGCCATT  
121 GCGGCTGCCA AAGAGCGTAT TAACTTGGCC AAAGTGGCGG TGAAGAAAAC CGGCATCGGT  
181 CTGGTCGAGG ACAAGATTAT CAAGAATCAC TTTGCCGCGG AGTATATCTA CAACAAATAC  
241 AAAAAAGAAA AGACTTGCGG CATCATTGAT CATGATGACA GCTTGGGTAT CACGAAAGTC  
301 GCAGAACCAA TCGGTATTGT CGCGGCAATT GTCCCGACCA CTAATCCGAC CAGCACCCGG  
361 ATCTTCAAGA GCTTGATCAG CCTGAAAACC CGCAACGCGA TTTTCTTCAG CCCGACCCG  
421 CGTGCGAAGA AGAGCACCAT CGCAGCGCGC AAGCTGATTT TGGATGCCCG GGTAAAGGCC  
481 GGTGCACCGA AAAACATTAT TGCTGGATT GACGAGCCGA GCATTGAGCT GTCTCAGGAC  
541 CTGATGAGCG AAGCGGACAT TATTCTGGCC ACCGGTGGTC CGTCTATGGT TAAGGCAGCG  
601 TACTCCAGCG GTAAGCCTGC TATCGGCGTT GGTGCGGGCA ATACGCCGGC TATCATCGAT  
661 GAAAGCGCGG ATATTGATAT GGCAGTTAGC TCCATCATTC TGTCCAAAAC CTACGACAAT  
721 GGTGTTATCT GTGCAAGCGA GCAAAGCATC CTGGTGATGA ATAGCATTTA CGAGAAGGTC  
781 AAAGAAGAGT TTGTTAAGCG TGGTTCCTAT ATTCTGAACC AGGAGGAGAT TGCAAAAATC  
841 AAAGAACAGT TGTTAAGAA TGGCGCGATT AATGCAGATA TTGTTGGTAA GTCCGCATAC  
901 ATTATCGCGA AGATGGCGGG TATCGAAGTG CCGCAATTCA CCAAATCTT GATCGGCGAA  
961 GTGCAGAGCG TGGAGAAGAG CGAACTGTTT AGCCATGAGA AACTGAGCCC GGTCTGGCT  
1021 ATGTACAAAG TGAAGGACTT TGACGAAGCC CTGAAGAAAG CTCAGCGTCT GATTGAGCTG  
1081 GGCGGCAGCG GTCACACGAG CAGCCTGTAT ATCGATAGCC AAAACAATAA GGACAAGGTG  
1141 AAAGAGTTTC GTCTGGCGAT GAAAACCTCT CGCACGTTTA TCAACATGCC GAGCAGCCAA  
1201 GGTGCGAGCG CGATCTGTA TAACTTCGTA ATCGCGCCTT CTTTTACGCT GGGTTGCGGT  
1261 ACCTGGGGCG GTAATTCGGT GAGCCAGAAT GTCGAGCCGA AGCACCTGCT GAACATCAA  
1321 TCGGTCGCGG AGCGCCGTGA GAAGAGACCG TGGTTCAAAG TCCCACAGAA AATTTACTTC  
1381 AAATACGGCT GCCTGCGTTT CGCGCTGAAA GAACTGAAAG ACATGAACAA AAAGCGTGCG  
1441 TTCATTGTTA CCGACAAAGA CCTGTTCAAA CTGGGTTACG TGAACAAAAT CACCAAAGTT  
1501 CTGGATGAAA TTGACATCAA GTACTCCATC TTCACTGATA TCAAATCCGA CCCAACGATT  
1561 GATAGCGTGA AAAAGGGCGC TAAAGAAATG CTGAACTTTG AACCGGACAC CATCATCAGC  
1621 ATCGGTGGTG GCTCTCCTAT GGATGCTGCG AAGGTCATGC ACCTGCTGTA CGAATACCCG

1681 GAAGCGGAAA TCGAAAACCT GGCTATCAAC TTCATGGACA TCCGCAAACG TATCTGCAAC  
1741 TTCCCGAAGC TGGGCACTAA AGCTATTTCC GTTGCCATCC CGACTACCGC GGGCACTGGT  
1801 TCCGAAGCCA CGCCGTTCGC CGTGATCACC AACGATGAAA CCGGTATGAA ATACCCGCTG  
1861 ACCTCTTACG AACTGACCCC GAACATGGCA ATTATCGACA CCGAGCTGAT GCTGAACATG  
1921 CCGCGCAAGC TGACCGCTGC TACCGGCATC GACGCTCTGG TACATGCTAT TGAGGCGTAC  
1981 GTTTCCTGTA TGGCTACCGA TTACACCGAC GAACTGGCCC TCGTGCAT CAAAATGATT  
2041 TTCAAGTACC TGCTCGCGC TTACAAAAAC GGCACGAATG ACATCGAGGC GCGTGAGAAA  
2101 ATGGCCCATG CAAGCAACAT CGCGGGCATG GCCTTCGCCA ACGCGTTCCT GGGCGTGTGC  
2161 CACTCTATGG CTCACAAACT GGGTGCTATG CACCACGTGC CGCACGGTAT CGCGTGTGCT  
2221 GTCCTGATCG AAGAAGTAAT TAAGTACAAC GCTACTGATT GCCCGACTAA ACAGACCGCC  
2281 TTCCACAGT ACAAACTCTC TAACGCTAAA CGTAAGTACG CTGAGATCGC CGAATACCTG  
2341 AACCTGAAGG GTACGAGCGA CACTGAGAAA GTTACTGCGC TGATCGAAGC TATCTCTAAA  
2401 CTGAAAATTG ACCTGTCCAT CCCGCGAAGC ATCAGCGCCG CAGGCATCAA CAAAAGGAC  
2461 TTTTACAACA CGCTGGACAA AATGAGCGAA CTGGCTTTTG ACGACCAGTG CACCACTGCA  
2521 AACCCGCGTT ACCCGCTGAT CTCTGAGCTG AAAGACATTT ATATCAAATC TTTTTTAA

**AdhE2.52 (76981)**

1 ATGAAAGTGA CGAACCAAAA AGAACTGAAA CAAAACTGA ATGAACTGCG TGAGGCCCG  
61 AAAAAAGTTCG CTACGTATAC CCAGGAGCAA GTTGAGAAGA TCTTCAAACA GTGTGCCATT  
121 GCGGCTGCCA AAGAGCGTAT TAACTTGGCC AAAGTGGCGG TGGAAAGAAC CGGCATCGGT  
181 CTGGTTCGAG ACAAGATTAT CAAGAATCAC TTTGCCGCGG AGTATATCTA CAACAAATAC  
241 AAAAAACGAAA AGACTTFCGG CATCATTTGAT CATGATGACA GCTTGGGTAT CACGAAAGTC  
301 GCAGAACCAA TCGGTATTGT CGCGGCAATT GTCCCGACCA CTAATCCGAC CAGCACCGCG  
361 ATCTTCAAGA GCTTGATCAG CCTGAAAACC CGCAACGCGA TTTTCTTCAG CCCGCACCCG  
421 CGTGCGAAGA AGAGCACCAT CGCAGCGGCG AAGCTGATTT TGGATGCCCG GGTAAAGGCC  
481 GGTGCACCGA AAAACATTAT TGCTGGATT GACGAGCCGA GCATTGAGCT GTCTCAGGAC  
541 CTGATGAGCG AAGCGGACAT TATTCTGGCC ACCGGTGGTC CGTCTATGGT TAAGGCAGCG  
601 TACTCCAGCG GTAAGCCTGC TATCGGCGTT GGTGCGGGCA ATACGCCGGC TATCATCGAT  
661 GAAAGCGCGG ATATTGATAT GGCAGTTAGC TCCATCATTG TGTCCAAAC TACAGACAAT  
721 GGTGTTATCT GTGCAAGCGA GCAAAGCATC CTGGTGATGA ATAGCATTTA CGAGAAGGTC  
781 AAAGAAGAGT TTGTTAAGCG TGGTTCCTAT ATTCTGAACC AGCAGGAGAT TGCAAAAATC  
841 AAAGAAACGA TGTTAAGAA TGGCGCGATT AATGCAGATA TTGTTGGTAA GTCCGCATAC  
901 ATTATCGCGA AGATGGCGGG TATCGAAGTG CCGCAAACCA CAAAATCTT GATCGGCGAA  
961 GTGCAGGACG TGGAGAAGAG CGAACTGTTT AGCCATGAGA AACTGAGCCC GGTTCCTGGCT  
1021 ATGTACAAAG TGAAGACTT TGACGAAGCC CTGAAGAAAG CTCAGCGTCT GATTGAGCTG  
1081 GGCGCGACCG GTCACACGAG CAGCCTGTAT ATCGATAGCC AAAACAATAA GGACAAGGTG  
1141 AAAGAGTTCG GTCTGGAGAT GAAAACCTCT CGCACGTTTA TCAACATGCC GAGCAGCCAA  
1201 GGTGCGAGCG GCGATCTGTA TAACTTCGCA ATCGCGCCTT CTTTTACGCT GGGTTGCGGT  
1261 ACCTGGGCGG GTAATTCGGT GAGCCAGAAT GTCGAGCCGA AGCACCTGCT GAACATCAAA  
1321 TCGGTTCGCG AGCGCCGTGA GAAGAGACCG TGGTTCAAAG TCCCACAGAA AATTTACTTC  
1381 AAATACGGCT GCCTGCGTTT CGCGCTGAAA GAACTGAAAG ACATGAACAA AAAGCGTGC  
1441 TTCATTGTTA CCGACAAAGA CCTGTTCAAA CTGGGTACG TGAACAAAAT CACCAAAGTT  
1501 CTGGATGAAA TTGACATCAA GTACTCCATC TTCACTGATA TCAAATCCGA CCCAACGATT  
1561 GATAGCGTGA AAAAGGGCGC TAAAGAAATG CTGAACTTTG AACCGGACAC CATCATCAGC  
1621 ATCGGTGGTG GCTCTCCTAT GGATGCTGCG AAGGTCATGC ACCTGCTGTA CGAATACCCG  
1681 GAAGCGGAAA TCGAAAACCT GGCTATCAAC TTCATGGACA TCCGCAAACG TATCTGCAAC  
1741 TTCCCGAAGC TGGGCACTAA AGCTATTTCC GTTGCCATCC CGACTACCGC GGGCACTGGT  
1801 TCCGAAGCCA CGCCGTTCGC CGTGATCACC AACGATGAAA CCGGTATGAA ATACCCGCTG  
1861 ACCTCTTACG AACTGACCCC GAACATGGCA ATTATCGACA CCGAGCTGAT GCTGAACATG  
1921 CCGCGCAAGC TGACCGCTGC TACCGGCATC GACGCTCTGG TACATGCTAT TGAGGCGTAC  
1981 GTTTCCTGTA TGGCTACCGA TTACACCGAC GAACTGGCCC TCGTGCAT CAAAATGATT  
2041 TTCAAGTACC TGCTCGCGC TTACAAAAAC GGCACGAATG ACATCGAGGC GCGTGAGAAA  
2101 ATGGCCCATG CAAGCAACAT CGCGGGCATG GCCTTCGCCA ACGCGTTCCT GGGCGTGTGC  
2161 CACTCTATGG CTCACAAACT GGGTGCTATG CACCACGTGC CGCACGGTAT CGCGTGTGCT  
2221 GTCCTGATCG AAGAAGTAAT TAAGTACAAC GCTACTGATT GCCCGACTAA ACAGACCGCC  
2281 TTCCACAGT ACAAACTCTC TAACGCTAAA CGTAAGTACG CTGAGATCGC CGAATACCTG  
2341 AACCTGAAGG GTACGAGCGA CACTGAGAAA GTTACTGCGC TGATCGAAGC TATCTCTAAA  
2401 CTGAAAATTG ACCTGTCCAT CCCGCGAAGC ATCAGCGCCG CAGGCATCAA CAAAAGGAC  
2461 TTTTACAACA CGCTGGACAA AATGAGCGAA CTGGCTTTTG ACGACCAGTG CACCACTGCA  
2521 AACCCGCGTT ACCCGCTGAT CTCTGAGCTG AAAGACATTT ATATCAAATC TTTTTTAA

**AdhE2.53 (76982)**



1 ATGAAAGTGA CGAACCAAAA AGAACTGAAA CAAAAACTGA ATGAACTGCG TGAGGCCCG  
61 AAAAAGTTCA ACACGTATAC CCAGGAGCAA GTTGACAAGA TCTTCAAACA GTGTGCCATT  
121 GCGGCTGCCA AATACCGTAT TAACTTGGCC AAAGTGGCGG TGAAGAAAAC CGGCATCGGT  
181 CTGGTCGAGG ACAAGATTAT CAAGAATCAC TTTGCCGCGG AGTATATCTA CAACAAATAC  
241 AAAAACGAAA AGACTTGC GG CATCATTGAT CATGATGACA GCTTGGGTAT CACGAAAGTC  
301 GCAGAACCAA TCGGTATTGT CGCGGCAATT GTCCCGACCA CTAATCCGAC CAGCACC GCG  
361 ATCTTCAAGA GCTTGATCAG CCTGAAAACC CGCAACGCGA TTTTCTTCAG CCCGCACCCG  
421 CGTGCGAAGA AGAGCACCAT CGCAGCGGCG AAGCTGATTT TGGATGCCGC GGTAAAGGCC  
481 GGTGCACCGA AAAACATTAT TGGCTGGATT GACGAGCCGA GCATTGAGCT GTCTCAGGAC  
541 CTGATGAGCG AAGCGGACAT TATTCTGGCC ACCGGTGGTC CGTCTATGGT TAAGGCACGG  
601 TACTCCAGCG GTAAGCCTGC TATCGGCGTT GGTGCGGGCA ATACGCCGGC TATCATCGAT  
661 GAAAGCGCGG ATATTGATAT GGCAGTTAGC TCCATCATTC TGTCCAAAAC CTACGACAAT  
721 GGTGTTATCT GTGCAAGCGA GCAAAGCATC CTGGTGATGA ATAGCATTTA CGAGAAGGTC  
781 AAAGAAGAGT TTGTTAAGCG TGGTTCCTAT ATTCTGAACC AGAACGCGAT TGCAAAAATC  
841 AAAGAAACGA TGTTTAAGAA TGGCGCGATT AATGCAGATA TTGTTGGTAA GTCCGCATAC  
901 ATTATCGCGA AGATGGCGGG TATCGAAGTG CCGCAAACCA CAAAATCTT GATCGGCGAA  
961 GTGCAGAGCG TGGAGAAGAG CGAACTGTTC AGCCATGAGA AACTGAGCCC GGTTCCTGGCT  
1021 ATGTACAAAG TGAAGGACTT TGACGAAGCC CTGAAGAAAG CTCAGCGTCT GATTGAGCTG  
1081 GGCGGAGCG GTACACAGAG CAGCCTGTAT ATCGATAGCC AAAACAATAA GGACAAGGTG  
1141 AAAGAGTTCG GTCTGGCGAT GAAAACCTCT CGCACGTTTA TCAACATGCC GAGCAGCCAA  
1201 GGTGCGAGCG GCGATCTGTA TAACTTCGCA ATCGCGCCTT CTTTTACGCT GGGTTGCCCG  
1261 ACCTGGGGCG GTAATTCGGT GAGCCAGAAT GTCGAGCCGA AGCACCTGCT GAACATCAAA  
1321 TCGGTCGCGG AGCGCCGTGA GAAGAGACCG TGGTTCAAAG TCCCACAGAA AATTTACTTC  
1381 AAATACGGCT GCCTGCGTTT CGCGCTGAAA GAACTGAAAG ACATGAACAA AAAGCGTGGC  
1441 TTCATTGTTA CCGACAAAAGA CCTGTTCAAAA CTGGGTTACG TGAACAAAAT CACCAAAGTT  
1501 CTGGATGAAA TTGACATCAA GTACTCCATC TTTACTGATA TCAAATCCGA CCCAACGATT  
1561 GATAGCGTGA AAAAGGGCGC TAAAGAAATG CTGAACTTTG AACCGGACAC CATCATCAGC  
1621 ATCGGTGGTG GCTCTCCTAT GGATGCTGCG AAGGTCATGC ACCTGCTGTA CGAATACCCG  
1681 GAAGCGGAAA TCGAAAACCT GGCTATCAAC TTCATGGACA TCCGCAAACG TATCTGCAAC  
1741 TTCCCGAAGC TGGGCACTAA AGCTATTTCC GTTGCCATCC CGACTACCGC GGGCATTGGT  
1801 TCCGAAGCCA CGCCGTTCCG CGTGATCAC AACGATGAAA CCGGTATGAA ATACCCGCTG  
1861 ACCCTTTACG AACTGACCCC GAACATGGCA ATTATCGACA CCGAGCTGAT GCTGAACATG  
1921 CCGCGCAAGC TGACCGCTGC TACCGGCATC GACGCTCTGG TACATGCTAT TGAGGCGTAC  
1981 GTTTCCTGTA TGGCTACCGA TTACACCGAC GAACTGGCCC TCGGTGCGAT CAAAATGATT  
2041 TTCAAGTACC TGCTCGCGC TTACAAAAAC GGACAGAATG ACATCGAGGC GCGTGAGAAA  
2101 ATGGCCCATG CAAGCAACAT CGCGGGCATG GCCTTCGCCA ACGCGTTTCT GGGCGTGTGC  
2161 CACTCTATGC CTCACAAACT GGGTGCTATG CACCACGTGC CGCACGGTAT CGCGTGTGCT  
2221 GTCTTATCGA AAGAGTAAT TAAGTACAAC GCTACTGATT GCCCGACTAA ACAGCCGCC  
2281 TTCCACAGT ACAATCTCC TAACGCTAAA CGTAAGTACG CTGAGATCGC CGAATACCTG  
2341 AACCTGAAGG GTACGAGCGA CACTGAGAAA GTTACTGCGC TGATCGAAGC TATCTCTAAA  
2401 CTGAAAATTG ACCTGTCCAT CCCGAGAAC ATCAGCGCCG CAGGCATCAA CAAAAGGAC  
2461 TTTTACAACA CGCTGGACAA AATGAGCGAA CTGGCTTTTG ACGACCAGTG CACCACTGCA  
2521 AACCCGCGTT ACCCGCTGAT CTCTGAGCTG AAAGACATTT ATATCAAATC TTTTAA

**AdhE2.54 (76983)**

1 ATGAAAGTGA CGAACCAAAA AGAACTGAAA CAAAAACTGA ATGAACTGCG TGAGGCCCG  
61 AAAAAGTTTCG CTACGTATAC CCAGGAGCAA GTTGACAAGA TCTTCAAACA GTGTGCCATT  
121 GCGGCTGCCA AAGAGCGTAT TAACTTGGCC AAAGTGGCGG TGAAGAAAAC CGGCATCGGT  
181 CTGGTCGAGG ACAAGATTAT CAAGAATCAC TTTGCCGCGG AGTATATCTA CAACAAATAC  
241 AAAAACGAAA AGACTTGC GG CATCATTGAT CATGATGACA GCTTGGGTAT CACGAAAGTC  
301 GCAGAACCAA TCGGTATTGT CGCGGCAATT GTCCCGACCA CTAATCCGAC CAGCACC GCG  
361 ATCTTCAAGA GCTTGATCAG CCTGAAAACC CGCAACGCGA TTTTCTTCAG CCCGCACCCG  
421 CGTGCGAAGA AGAGCACCAT CGCAGCGGCG AAGCTGATTT TGGATGCCGC GGTAAAGGCC  
481 GGTGCACCGA AAAACATTAT TGGCTGGATT GACGAGCCGA GCATTGAGCT GTCTCAGGAC  
541 CTGATGAGCG AAGCGGACAT TATTCTGGCC ACCGGTGGTC CGTCTATGGT TAAGGCACGG  
601 TACTCCAGCG GTAAGCCTGC TATCGGCGCG GGTGCGGGCA ATACGCCGGC TATCATCGAT  
661 GAAAGCGCGG ATATTGATAT GGCAGTTAGC TCCATCATTC TGTCCAAAAC CTACGACAAT  
721 GGTGTTATCT GTGCAAGCGA GCAAAGCATC CTGGTGATGA ATAGCATTTA CGAGAAGGTC  
781 AAAGAAGAGT TTGTTAAGCG TGGTTCCTAT ATTCTGAACC AGCAGGAGAT TGCAAAAATC  
841 AAAGAAACGA TGTTTAAGAA TGGCGCGATT AATGCAGATA TTGTTGGTAA GTCCGCATAC  
901 ATTATCGCGA AGATGGCGGG TATCGAAGTG CCGCAAACCA CAAAATCTT GATCGGCGAA  
961 GTGCAGAGCG TGGAGAAGAG CGAACTGTTC AGCGAGGAGA AACTGAGCCC GGTTCCTGGCT

|      |             |            |            |            |             |            |
|------|-------------|------------|------------|------------|-------------|------------|
| 1021 | ATGTACAAAG  | TGAAGGACTT | TGACGAAGCC | CTGAAGAAAG | CTCAGCGTCT  | GATTGAGCTG |
| 1081 | GGCGGCAGCG  | GTCACACGAG | CAGCCTGTAT | ATCGATAGCC | AAAACAATAA  | GGACAAGGTG |
| 1141 | AAAGAGTTTCG | GTCTGGCGAT | GAAAACCTCT | CGCACGTTTA | TCAACATGCC  | GAGCAGCCAA |
| 1201 | GGTGCAGCG   | GCGATCTGTA | TAACCTCGCA | ATCGCGCCTT | CTTTTACGCT  | GGGTTGCGGT |
| 1261 | ACCTGGGGCG  | GTAATTCGGT | GAGCCAGAAT | GTCGAGCCGA | AGCACCTGCT  | GAACATCAAA |
| 1321 | TCGGTCCGCG  | GTCGCCGTGA | GAAGAGACCG | TGGTTCAAAG | TCCCACAGAA  | AATTTACTTC |
| 1381 | AAATACGGCT  | GCCTGCGTTT | CGCGCTGAAA | GAAGTAAAAG | ACATGAACAA  | AAAGCGTGCG |
| 1441 | TTCATTGTTA  | CCGACAAAGA | CCTGTTCAAA | CTGGGTTACG | TGAACAAAAT  | CACCAAAGTT |
| 1501 | CTGGATGAAA  | TTGACATCAA | GTACTCCATC | TTCACTGATA | TCAAATCCGA  | CCCAACGATT |
| 1561 | GATAGCGTGA  | AAAAGGGCGC | TAAAGAAATG | CTGAACTTTG | AACCGGACAC  | CATCATCAGC |
| 1621 | ATCGGTGGTG  | GCTCTCCTAT | GGATGCTGCG | AAGGTCTATG | ACCTGCTGTA  | CGAATACCCG |
| 1681 | GAAGCGGAAA  | TCGAAAACCT | GGCTATCAAC | TTCATGGACA | TCCGCAAACG  | TATCTGCAAC |
| 1741 | TTCCCGAAGC  | TGGGCACTAA | AGCTATTTCC | GTTGCCATCC | CGACTACCGC  | GGGCACTGGT |
| 1801 | TCCGAAGCCA  | CGCCGTTCCG | CGTGATCACC | AACGATGAAA | CCGGTATGAA  | ATACCCGCTG |
| 1861 | ACCTCTTACG  | AACTGACCCC | GAACATGGCA | ATTATCGACA | CCGAGCTGAT  | GCTGAACATG |
| 1921 | CCGCGCAAGC  | TGACCGCTGC | TACCGGCATC | GACGCTCTGG | TACATGCTAT  | TGAGGCGTAC |
| 1981 | TTTTCCGTGA  | TGGTACCGA  | TTACACCGAC | GAAGTGGCCC | TGCGTGCGAT  | CAAAATGATT |
| 2041 | TTCAAGTACC  | TGCCTCGCGC | TTACAAAAAC | GGCAGCAATG | ACATCGAGGC  | CGGTGAGAAA |
| 2101 | ATGGCCCATG  | CAAGCAACAT | CGCGGGCATG | GCCTTCGCCA | ACGCGTTCCCT | GGGCGTGTGC |
| 2161 | CACTCTATGG  | CTCACAAACT | GGGTGCTATG | CACCACGTGC | CGCACGGTAT  | CGCGTGTGCT |
| 2221 | GTCCTGATCG  | AAGAAGTAAT | TAAGTACAAC | GCTACTGATT | GCCCAGCTAA  | ACAGACCCGC |
| 2281 | TTCCACAGT   | ACAATCTCC  | TAACGCTAAA | CGTAAGTACG | CTGAGATCGC  | CGAATACCTG |
| 2341 | AACCTGAAGG  | GTACGAGCGA | CACTGAGAAA | GTTACTGCGC | TGATCGAAGC  | TATCTCTAAA |
| 2401 | CTGAAAATTG  | ACCTGTCCAT | CCCGCAGAAC | ATCAGCGCCG | CAGGCATCAA  | CAAAAAGGAC |
| 2461 | TTTTACAACA  | CGCTGGACAA | AATGAGCGAA | CTGGCTTTTG | ACGACCAGTG  | CACCACTGCA |
| 2521 | AACCCGCGTT  | ACCCGCTGAT | CTCTGAGCTG | AAAGACATTT | ATATCAAATC  | TTTTTAA    |

**AdhE2.55 (76984)**

|      |             |            |            |            |            |             |
|------|-------------|------------|------------|------------|------------|-------------|
| 1    | ATGAAAGTGA  | CGAACCAAAA | AGAAGTAAA  | CAAAAAGTGA | ATGAAAGTGA | TGAGGCCAG   |
| 61   | AAAAAGTTTCG | CTACGTATAC | CCAGGAGCAA | GTTGACAAGA | TCTTCAAACA | GTGTGCCATT  |
| 121  | GCGGCTGCCA  | AAGAGCGTAT | TAACCTGGCC | AAACTGGCGG | TGGAAGAAAC | CGGCATCGGT  |
| 181  | CTGGTCGAGG  | ACAAGATTAT | CAAGAATCAC | TTTGCCGCGG | AGTATATCTA | CAACAAATAC  |
| 241  | AAAAACGAAA  | AGACTTGCGG | CATCATTGAT | CATGATGACA | GCTTGGGTAT | CACGAAAGTC  |
| 301  | GCAGAACCAA  | TCGGTATTGT | CGCGGCAATT | GTCCCGACCA | CTAATCCGAC | CAGCACCCTG  |
| 361  | ATCTTCAAGA  | GCTTGATCAG | CCTGAAAACC | CGCAACGCGA | TTTTCTTCAG | CCCGCACCCTG |
| 421  | CGTGCGAAGA  | AGAGCACCAT | CGCAGCGCGC | ACCCTGATTT | TGGATGCCGC | GGTTAAGGCC  |
| 481  | GGTGCACCGA  | AAAACATTAT | TGGCTGGATT | GACGAGCCGA | GCATTGAGCT | GTCTCAGGAC  |
| 541  | CTGATGAGCG  | AAGCGGACAT | TATTCTGGCC | ACCGGTGGTC | CGTCTATGGT | TAAGGCAGCG  |
| 601  | TACTCCAGCG  | GTAAGCCTGC | TATCGGCGTT | GGTGCGGGCA | ATACGCCGCG | TATCATCGAT  |
| 661  | GAAAGCGCGG  | ATATTGATAT | GGCAGTTAGC | TCCATCATTC | TGTCCAAAAC | CTACGACAAT  |
| 721  | GGTGTATCT   | GTGCAAGCGA | GCAAAGCATC | CTGGTATGTA | ATAGCATTTA | CGAGAAGGTC  |
| 781  | AAAGCGGAGT  | TTGTTAAGCG | TGGTTCCTAT | ATTCTGAACC | AGAACGAGAT | TGCAAAAATC  |
| 841  | AAAGAAACGA  | TGTTTAAGAA | TGGCGCGATT | AATGCAGATA | TTGTTGGTAA | GTCCGCATAC  |
| 901  | ATTATCGCGA  | AGATGGCGGG | TATCGAAGTG | CCGCAAACCA | CCAAAATCTT | GATCGGCGAA  |
| 961  | GTGCAGAGCG  | TGGAGAAGAG | CGAACTGTTC | AGCAAAGAGA | AACTGAGCCC | GGTTCCTGGCT |
| 1021 | ATGTACAAAG  | TGAAGGACTT | TGACGAAGCC | CTGAAGAAAG | CTCAGCGTCT | GATTAACCTG  |
| 1081 | GGCGGCAGCG  | GTCACACGAG | CAGCCTGTAT | ATCGATAGCC | AAAACAATAA | GGACAAGGTG  |
| 1141 | AAAGAGTTTCG | GTCTGGCGAT | GAAAACCTCT | CGCACGTTTA | TCAACATGCC | GAGCAGCCAA  |
| 1201 | GGTGCAGCG   | GCGATCTGTA | TAACCTCGCA | ATCGCGCCTT | CTTTTACGCT | GGGTTGCGGT  |
| 1261 | ACCTGGGGCG  | GTAATTCGGT | GAGCCAGAAT | GTCGAGCCGA | AGCACCTGCT | GAACATCAAA  |
| 1321 | TCGGTCCGCG  | AGCGCCGTGA | GAAGAGACCG | TGGTTCAAAG | TCCCACAGAA | AATTTACTTC  |
| 1381 | AAATACGGCT  | GCCTGCGTTT | CGCGCTGAAA | GAAGTAAAAG | ACATGAACAA | AAAGCGTGCG  |
| 1441 | TTCATTGTTA  | CCGACAAAGA | CCTGTTCAAA | CTGGGTTACG | TGAACAAAAT | CACCAAAGTT  |
| 1501 | CTGGATGAAA  | TTGACATCAA | GTACTCCATC | TTCACTGATA | TCAAATCCGA | CCCAACGATT  |
| 1561 | GATAGCGTGA  | AAAAGGGCGC | TAAAGAAATG | CTGAACTTTG | AACCGGACAC | CATCATCAGC  |
| 1621 | ATCGGTGGTG  | GCTCTCCTAT | GGATGCTGCG | AAGGTCTATG | ACCTGCTGTA | CGAATACCCG  |
| 1681 | GAAGCGGAAA  | TCGAAAACCT | GGCTATCAAC | TTCATGGACA | TCCGCAAACG | TATCTGCAAC  |
| 1741 | TTCCCGAAGC  | TGGGCACTAA | AGCTATTTCC | GTTGCCATCC | CGACTACCGC | GGGCACTGGT  |
| 1801 | TCCGAAGCCA  | CGCCGTTCCG | CGTGATCACC | AACGATGAAA | CCGGTATGAA | ATACCCGCTG  |
| 1861 | ACCTCTTACG  | AACTGACCCC | GAACATGGCA | ATTATCGACA | CCGAGCTGAT | GCTGAACATG  |
| 1921 | CCGCGCAAGC  | TGACCGCTGC | TACCGGCATC | GACGCTCTGG | TACATGCTAT | TGAGGCGTAC  |
| 1981 | TTTTCCGTGA  | TGGTACCGA  | TTACACCGAC | GAAGTGGCCC | TGCGTGCGAT | CAAAATGATT  |

|      |             |            |            |            |            |            |
|------|-------------|------------|------------|------------|------------|------------|
| 2041 | TTCAAGTACC  | TGCCTCGCGC | TTACAAAAAC | GGCACGAATG | ACATCGAGGC | GCGTGAGAAA |
| 2101 | ATGGCCCATG  | CAAGCAACAT | CGCGGGCATG | GCCTTCGCCA | ACGCGTTCCT | GGGCGTGTGC |
| 2161 | CACCTATGCG  | CTCACAAACT | GGGTGCTATG | CACCACGTGC | CGCACGGTAT | CGCGTGTGCT |
| 2221 | CTCCTGATGG  | AAGAAGTAAT | TAAGTACAAC | GCTACTGATT | GCCCCACTAA | ACAGACCGCC |
| 2281 | TTCCACACAGT | ACAAATCTCC | TAACGCTAAA | CGTAAGTACG | CTGAGATCGC | CGAATACCTG |
| 2341 | AACCTGAAGG  | GTACGAGCGA | CACTGAGAAA | GTTACTGCGC | TGATCGAAGC | TATCTCTAAA |
| 2401 | CTGAAAATTG  | ACCTGTCCAT | CCCGCAGAAC | ATCAGCGCCG | CAGGCATCAA | CAAAAAGGAC |
| 2461 | TTTTACAACA  | CGCTGGACAA | AATGAGCGAA | CTGGCTTTTG | ACGACCAGTG | CACCACTGCA |
| 2521 | AACCCGCGTT  | ACCCGCTGAT | CTCTGAGCTG | AAAGACATTT | ATATCAAATC | TTTTTAA    |

**AdhE2.56 (76985)**

|      |             |            |             |             |            |            |
|------|-------------|------------|-------------|-------------|------------|------------|
| 1    | ATGAAAGTGA  | CGAACCAAAA | AGAAGTAAAA  | CAAAAAGTGA  | ATGAACTGCG | TGAGGCCAG  |
| 61   | AAAAAGTTCG  | CTACGTATAC | CCAGGAGCAA  | GTTGACAAGA  | TCTTCAAACA | GTGTGCCATT |
| 121  | GCGGCTGCCA  | AAGAGCGTAT | TAAGTGGGCC  | AAACTGGCGG  | TGGAAGAAAC | CGGCATCGGT |
| 181  | CTGGTTCGAGG | ACAAGATTAT | CAAGAATCAC  | TTTGCCGCGG  | AGTATATCTA | CAACAAATAC |
| 241  | AAAAACGAAA  | AGACTTGCAG | CATCATTGAT  | CATGATGACA  | GCTTGGGTAT | CACGAAAGTC |
| 301  | GCAGAACCAA  | TCGGTATTGT | CGCGGCAATT  | GTCCCGACCA  | CTAATCCGAC | CAGCACCAGC |
| 361  | ATCTTCAAGA  | GCTTGATCAG | CCTGAAAACC  | CGCAACGCGA  | TTTTCTTCAG | CCCGCACCCG |
| 421  | CGTGCGAAGA  | AGAGCACCAT | CGCAGCGGCG  | AAGCTGATTT  | TGGATGCCCG | GGTAAAGGCC |
| 481  | GGTGACCCGA  | AAAACATTAT | TGGCTGGATT  | GACGAGCCGA  | GCATTGAGCT | GTCTCAGGAC |
| 541  | CTGATGAGCG  | AAGCGGACAT | TATTCTGGCC  | ACCGGTGGTC  | CGTCTATGGT | TAAGGCAGCC |
| 601  | TACTTCAGCG  | GTAAGCCTGC | TATCGCGGTT  | GGTGCAGGCA  | ATACGCCGCG | TATCATCGAT |
| 661  | GAAAGCGCGG  | ATATTGATAT | GGCAGTTAGC  | TCCATCATTC  | TGTCCAAAAC | CTACGACAAT |
| 721  | GGTGTATCT   | GTGCAAGCGA | GCAAAGCATC  | CTGGTGATGA  | ATAGCATTTA | CGAGAAGGTC |
| 781  | AAAGAAGAGT  | TTGTTAAGCG | TGGTTCCTAT  | ATCTGAACC   | AGAACGAGAT | TGCAAAAATC |
| 841  | AAAGAAACGA  | TGTTAAGAA  | TGGCGCGATT  | AATCGTGATA  | TTGTTGGTAA | GTCCGCATAC |
| 901  | ATTATCGCGA  | AGATGGCGGG | TATCGAAGTG  | CCGCAATTCA  | CCAAAATCTT | GATCGGCGAA |
| 961  | GTGCAGGACG  | TGGAGAAGAG | CGAAGTGTTC  | AGCCATGAGA  | AACTGAGCCC | GGTCTGTGGT |
| 1021 | ATGTACAAAAG | GTAAGCCTGC | TGACGAAGCC  | CTGAAGAAAAG | CTCAGCGTCT | GATTGAGCTG |
| 1081 | GCGGCGAGCG  | GTACACAGAG | CAGCCTGTAT  | ATCGATAGCC  | AAAAACAATA | GGACAAGGTG |
| 1141 | AAAGAGTTCG  | GTCTGGCGAT | GAAAACCTCT  | CGCACGTTTA  | TCAACATGCC | GAGCAGCCAA |
| 1201 | GGTGCAGGCG  | GCGATCTGTA | TAAGTTCGCA  | ATCGCGCCTT  | CTTTTACGCT | GGGTTGCGGT |
| 1261 | ACCTGGGGCG  | GTAATTCGGT | GAGCCAGAAT  | GTCGAGCCGA  | AGCACCTGCT | GAACATCAAA |
| 1321 | TCGGTTCGCG  | GTCGCCGTGA | GAAGAGACCG  | TGGTTCAAAG  | TCCCACAGAA | AATTTACTTC |
| 1381 | AAATACGGCT  | GCCTGCGTTT | CGCGTGAATA  | GAAGTGAAG   | ACATGAACAA | AAAGCGTGGC |
| 1441 | TTTATTTGTTA | CCGACAAAAG | CCTGTTCAAA  | CTGGGTTACG  | TGAACAAAAT | CACCAAAGTT |
| 1501 | CTGGATGAAA  | TTGACATCAA | GTAAGTCCATC | TTCATGATA   | TCAAATCCGA | CCCAACGATT |
| 1561 | GATAGCGTGA  | AAAAGGGCGC | TAAAGAAATG  | CTGAAGTTTG  | AACCGGACAC | CATCATCAGC |
| 1621 | ATCGTGGGTG  | GCTCTCCTAT | GGATGCTGCG  | AAGGTCATGC  | ACCTGCTGTA | CGAATACCCG |
| 1681 | GAAGCGGAAA  | TCGAAAACCT | GGCTATCAAC  | TTCATGGACA  | TCCGCAAACG | TATCTGCAAC |
| 1741 | TTCCGAAGC   | TGGGCACTAA | AGCTATTTCC  | GTTGCCATCC  | CGACTACCGC | GGGACTGGT  |
| 1801 | TCCGAAGCCA  | CGCGTTCGCG | CGTGATCACC  | AACGATGAAA  | CCGGTATGAA | ATACCCGCTG |
| 1861 | ACCTCTTACG  | AACTGACCCC | GAACATGGCA  | ATTATCGACA  | CCGAGCTGAT | GCTGAACATG |
| 1921 | CCGCGCAAGC  | TGACCGCTGC | TACCGGCATC  | GACGCTCTGG  | TACATGCTAT | TGAGGCGTAC |
| 1981 | GTTTCCGTGA  | TGGTACCAGA | TTACACCGAC  | GAAGTGGCCC  | TGCGTGCAT  | CAAAATGATT |
| 2041 | TTCAAGTACC  | TGCCTCGCGC | TTACAAAAAC  | GGCACGAATG  | ACATCGAGGC | GCGTGAGAAA |
| 2101 | ATGGCCCATG  | CAAGCAACAT | CGCGGGCATG  | GCCTTCGCCA  | ACGCGTTCCT | GGGCGTGTGC |
| 2161 | CACCTATGCG  | CTCACAAACT | GGGTGCTATG  | CACCACGTGC  | CGCACGGTAT | CGCGTGTGCT |
| 2221 | GTCCTGATCG  | AAGAAGTAAT | TAAGTACAAC  | GCTACTGATT  | GCCCCACTAA | ACAGACCGCC |
| 2281 | TTCCACACAGT | ACAAATCTCC | TAACGCTAAA  | CGTAAGTACG  | CTGAGATCGC | CGAATACCTG |
| 2341 | AACCTGAAGG  | GTACGAGCGA | CACTGAGAAA  | GTTACTGCGC  | TGATCGAAGC | TATCTCTAAA |
| 2401 | CTGAAAATTG  | ACCTGTCCAT | CCCGCAGAAC  | ATCAGCGCCG  | CAGGCATCAA | CAAAAAGGAC |
| 2461 | TTTTACAACA  | CGCTGGACAA | AATGAGCGAA  | CTGGCTTTTG  | ACGACCAGTG | CACCACTGCA |
| 2521 | AACCCGCGTT  | ACCCGCTGAT | CTCTGAGCTG  | AAAGACATTT  | ATATCAAATC | TTTTTAA    |

**AdhE2.57 (76986)**

|     |             |            |            |            |            |            |
|-----|-------------|------------|------------|------------|------------|------------|
| 1   | ATGAAAGTGA  | CGAACCAAAA | AGAAGTAAAA | CAAAAAGTGA | ATGAACTGCG | TGAGGCCAG  |
| 61  | AAAAAGTTCG  | CTACGATGAC | CCAGGAGCAA | GTTGACAAGA | TCTTCAAACA | GTGTGCCATT |
| 121 | GCGGCTGCCA  | AAGAGCGTAT | TAAGTGGGCC | AAACTGGCGG | TGGAAGAAAC | CGGCATCGGT |
| 181 | CTGGTTCGAGG | ACAAGATTAT | CAAGAATCAC | TTTGCCGCGG | AGTATATCTA | CAACAAATAC |
| 241 | AAAAACGAAA  | AGACTTGCAG | CATCATTGAT | CATGATGACA | GCTTGGGTAT | CACGAAAGTC |
| 301 | GCAGAACCAA  | TCGGTATTGT | CGCGGCAATT | GTCCCGACCA | CTAATCCGAC | CAGCACCAGC |

361 ATCTTCAAGA GCTTGATCAG CCTGAAAACC CGCAACGCGA TTTTCTTCAG CCCGCACCCG  
421 CGTGCGAAGA AGAGCACCAT CGCAGCGGCG AAGCTGATTT TGGATGCCGC GGTAAAGGCC  
481 GGTGCACCGA AAAACATTAT TGGCTGGATT GACGAGCCGA GCATTGAGCT GTCTCAGGAC  
541 CTGATGAGCG AAGCGGACAT TATTCTGGCC ACCGGTGGTC CGTCTATGGT TAAGGCAGCG  
601 TACTCCAGCG GTAAGCCTGC TATCGGCGTT GGTGCGGGCA ATACGCCGGC TATCATCGAT  
661 GAAAGCGCGG ATATTGATAT GGCAGTTAGC TCCATCATTC TGTCCAAAAC CTACGACAAT  
721 AACGTTATCT GTGCAAGCGA GCAAAGCATC CTGGTGATGA ATAGCATTTA CGAGAAGGTC  
781 AAAGAGAGT TTGTTAAGCG TGGTTCCTAT ATTCTGAACC AGAACGAGAT TGCAAAAATC  
841 AAAGAAACGA TGTTTAAGAA TGGCGCGATT AATCGTGATA TTGTTGGTAA GTCCGCATAC  
901 ATTATCGCGA AGATGGCGGG TATCGAAGTG CCGCAAACCA CAAAATCTT GATCGGCGAA  
961 GTGCAGAGCG TGGAGAAGAG CGAACTGTTT AGCGTTGAGA AACTGAGCCC GGTTCGGCT  
1021 ATGTACAAAG TGAAGGACTT TGACGAAGCC CTGAAGAAAG CTCAGCGTCT GATTGAGCTG  
1081 GCGGCGAGCG GTCACACGAG CAGCCTGTAT ATCGATAGCC AAAACAATAA GGACAAGGTG  
1141 AAAGAGTTCG GTCTGGCGAT GAAAACCTCT CGCACGTTTA TCAACATGCC GAGCAGCCAA  
1201 GGTGCGAGCG GCGATCTGTA TAACTTCGCA ATCGCGCCTT CTTTTACGCT GGGTTGCGGT  
1261 ACCTGGGGCG GTAATTTCGGT GAGCCAGAAT GTCGAGCCGA AGCACCTGCT GAACATCAAA  
1321 TCGGTCGCGG AGCGCCGTGA GAAGAGACCG TGGTTCAAAG TCCCACAGAA AATTTACTTC  
1381 AAATACGGCT GCCTGCGTTT CGCGTGAAA GAACTGAAAG ACATGAACAA AAAGCGTGCG  
1441 TTCATTGTTA CCGACAAAAGA CCTGTTCAAA CTGGGTTACG TGAACAAAAT CACCAAAGTT  
1501 CTGGATGAAA TTGACATCAA GTACTCCATC TTCACTGATA TCAAATCCGA CCCAACGATT  
1561 GATAGCGTGA AAAAGGGCGC TAAAGAAATG CTGAACTTTG AACCGGACAC CATCATCAGC  
1621 ATCGTGGTGT GCTCTCCTAT GGATGCTGCG AAGGTCATGC ACCTGCTGTA CGAATACCCG  
1681 GAAGCGGAAA TCGAAAACCT GGCTATCAAC TTCATGGACA TCCGCAAACG TATCTGCAAC  
1741 TTCCCGAAGC TGGGCACTAA AGCTATTTCC GTTGCCATCC CGACTACCGC GGGCATTGGT  
1801 TCCGAAGCCA CGCGTTCGCG CCGTATCACC AACGATGAAA CCGGTATGAA ATACCCGCTG  
1861 ACCTCTTACG AACTGACCCC GAACATGGCA ATTATCGACA CCGAGCTGAT GCTGAACATG  
1921 CCGCGCAAGC TGACCGCTGC TACCGGCATC GACGCTCTGG TACATGCTAT TGAGGCGTAC  
1981 GTTTCGCTGA TGGTACCGA TTACACCGAC GAACTGGCCC TCGGTGCGAT CAAAATGATT  
2041 TTCAAGTACC TGCCTCGCGC TTACAAAAAC GGCACGAATG ACATCGAGGC GCGTGAGAAA  
2101 ATGCGCCCATG CAAGCAACAT CGCGGGCATG GCCTTCGCCA ACGCGTTCCT GGGCGTGTGC  
2161 CACTCTATGG CTCACAAACT GGGTGCTATG CACCACGTGC CGCACGGTAT CGCGTGTGCT  
2221 GTCCTAGTCG AAGAAGTAAT TAAGTACAAC GCTACTGATT GCCCGACTAA ACAGACCGCC  
2281 TTCCCACAGT ACAAATCTCC TAACGCTAAA CGTAAGTACG CTGAGATCGC CGAATACCTG  
2341 AACCTGAAGG GTACGAGCGA CACTGAGAAA GTTACTGCGC TGATCGAAGC TATCTCTAAA  
2401 CTGAAAATTG ACCTGTCCAT CCCGAGAAGC ATCAGCGCCG CAGGCATCAA CAAAAGGAC  
2461 TTTTACAACA CGCTGGACAA AATGAGCGAA CTGGCTTTTG ACGACCAGTG CACCCTGCA  
2521 AACC CGGTT ACCCGCTGAT CTCTGAGCTG AAAGACATTT ATATCAAATC TTTTAA

**AdhE2.58 (76987)**

1 ATGAAAGTGA CGAACCAAAA AGAACTGAAA CAAAAACTGA ATGAACTGCG TGAGGCCCGAG  
61 AAAAAGTTCG CTACGTATAC CCAGGAGCAA GTTGACAAGA TCTTCAAACA GTGTGCCATT  
121 CCGGCTGCCA AAGAGCGTAT TAACTTGCC AAAGTGGCGG TGAAGAAAC CGGCATCGGT  
181 CTGGTCGAGG ACAAGATTAT CAAGAATCAC TTTGCCGCGG AGTATATCTA CAACAAATAC  
241 AAAAACGAAA AGACTTGCGG CATCATTGAT CATGATGACA GCTTGGGTAT CACGAAAGTC  
301 GCAGAACCAA TCGGTATTGT CGCGAGCATT GTCCCGACCA CTAATCCGAC CAGCACCAGC  
361 ATCTTCAAGA GCTTGATCAG CCTGAAAACC CGCAACGCGA TTTTCTTCAG CCCGCACCCG  
421 CGTGCGAAGA AGAGCACCAT CGCAGCGGCG AAGCTGATTT TGGATGCCGC GGTAAAGGCC  
481 GGTGCACCGA AAAACATTAT TGGCTGGATT GACGAGCCGA GCATTGAGCT GTCTCAGGAC  
541 ATGATGAGCG AAGCGGACAT TATTCTGGCC ACCGGTGGTC CGTCTATGGT TAAGGCAGCG  
601 TACTCCAGCG GTAAGCCTGC TATCGGCGTT GGTGCGGGCA ATACGCCGGC TATCATCGAT  
661 GAAAGCGCGG ATATTGATAT GGCAGTTAGC TCCATCATTC TGTCCAAAAC CTACGACAAT  
721 GGTGTTATCT GTGCAAGCGA GCAAAGCATC CTGGTGATGA ATAGCATTTA CGAGAAGGTC  
781 AAAAAAGAGT TTGTTAAGCG TGGTTCCTAT ATTCTGAACC AGAACGAGAT TGCAAAAATC  
841 AAAGAAACGA TGTTTAAGAA TGGCGCGATT AATGCAGATA TTGTTGGTAA GTCCGCATAC  
901 ATTATCGCGA AGATGGCGGG TATCGAAGTG CCGCAAACCA CAAAATCTT GATCGGCGAA  
961 GTGCAGAGCG TGGAGAAGAG CGAACTGTTT AGCCATGAGA AACTGAGCCC GGTTCGGCT  
1021 ATGTACAAAG TGAAGGACTT TGACGAAGCC CTGAAGAAAG CTCAGCGTCT GATTGAGCTG  
1081 GCGGCGAGCC ACCACACGAG CAGCCTGTAT ATCGATAGCC AAAACAATAA GGACAAGGTG  
1141 AAAGAGTTCG GTCTGGCGAT GAAAACCTCT CGCACGTTTA TCAACATGCC GAGCAGCCAA  
1201 GGTGCGAGCG GCGATCTGTA TAACTTCGCA ATCGCGCCTT CTTTTACGCT GGGTTGCGGT  
1261 ACCTGGGGCG GTAATTTCGGT GAGCCAGAAT GTCGAGCCGA AGCACCTGCT GAACATCAAA  
1321 TCGGTCGCGG AGCGCCGTGA GAAGAGACCG TGGTTCAAAG TCCCACAGAA AATTTACTTC

|      |             |            |               |              |            |            |
|------|-------------|------------|---------------|--------------|------------|------------|
| 1381 | AAATACGGCT  | GCCTGCGTTT | CGCGCTGAAA    | GAACTGAAAG   | ACATGAACAA | AAAGCGTGCG |
| 1441 | TTCATTGTTA  | CCGACAAAGA | CCTGTTCAAA    | CTGGGTTACG   | TGAACAAAAT | CACCAAAGTT |
| 1501 | CTGGATGAAA  | TTGACATCAA | GTACTIONCAT   | TTCATIONGATA | TCAAATCCGA | CCCAACGATT |
| 1561 | GATAGCGTGA  | AAAAGGGCGC | TAAAGAAATG    | CTGAACITTTG  | AACCGGACAC | CATCATCAGC |
| 1621 | ATCGGTGGTG  | GCTCTCCTAT | GGATGCTGCG    | AAGGTCATGC   | ACCTGCTGTA | CGAATACCCG |
| 1681 | GAAGCGGAAA  | TCGAAAACCT | GGCTATCAAC    | TTCATGGACA   | TCCGCAAACG | TATCTGCAAC |
| 1741 | TTCCCGAAGC  | TGGGCACTAA | AGCTATTTCC    | GTTGCCATCC   | CGACTACCGC | GGGCACTGGT |
| 1801 | TCCGAAGCCA  | CGCCGTTCGC | CGTATCACC     | AACGATGAAA   | CCGGTATGAA | ATACCCCGTG |
| 1861 | ACCTTTACG   | AACTGACCCC | GAACATGGCA    | ATTATCGACA   | CCGAGCTGAT | GCTGAACATG |
| 1921 | CCGCGCAAGC  | TGACCGCTGC | TACCGGCATC    | GACGCTCTGG   | TACATGCTAT | TGAGGCGTAT |
| 1981 | TTTTCCGTGA  | TGGCTACCGA | TTACACCGAC    | GACTIONGGCC  | TGCGTGCATG | CAAAATGATT |
| 2041 | TTCAAGTACC  | TGCCCTCGCG | TTACAAAAAC    | GGCACGAATG   | ACATCGAGGC | GCGTGAGAAA |
| 2101 | ATGGCCCATG  | CAAGCAACAT | CGCGGGCATG    | GCCTTCGCCA   | ACGCGTTCCT | GGGCGTGTGC |
| 2161 | CACTCTATGG  | CTCACAAACT | GGGTGCTATG    | CACCACGTGC   | CGCACGGTAT | CGCGTGTGCT |
| 2221 | GTCCGTATCG  | AAGAAGTAAT | TAAGTACAAC    | GCTACTGATT   | GCCCCACTAA | ACAGACCGCC |
| 2281 | TTCCACAGT   | ACAAATCTCC | TAACGCTAAA    | CGTAAGTACG   | CTGAGATCGC | CGAATACCTG |
| 2341 | AACCTGAAGG  | GTACGAGCGA | CACTIONGAGAAA | GTTACTGCGC   | TGATCGAAGC | TATCTCTAAA |
| 2401 | CTGAAAATTG  | ACCTGTCCAT | CCGCGAGAAC    | ATCAGCGCCG   | CAGGCATCAA | CAAAAAGGAC |
| 2461 | TTTTTACAACA | CGCTGGACAA | AATGAGCGAA    | CTGGCTTTTTG  | ACGACCAGTG | CACCACTGCA |
| 2521 | AACCCGCGTT  | ACCCGCTGAT | CTCTGAGCTG    | AAAGACATTT   | ATATCAAATC | TTTTTAA    |

**AdhE2.59 (76988)**

|      |             |                |               |               |               |             |
|------|-------------|----------------|---------------|---------------|---------------|-------------|
| 1    | ATGAAAGTGA  | CGAACCAAAA     | AGAATIONGAAA  | CAAAAATIONGA  | ATGAAATIONGCG | TGAGGCCCGAG |
| 61   | AAAAAGTTTCG | CTACGTATAC     | CCAGGAGCAA    | GTTGACAAGA    | TCTTCAAACA    | GTGTGCCATT  |
| 121  | GCGGCTGCCA  | AAGAGCGTAT     | TACTIONTTGGCC | AACTIONTGGCGG | TGGAAGAAAC    | CGGCATCGGT  |
| 181  | CTGGTTCGAGG | ACAAGATTAT     | CAAGAATCAC    | TTTGCCCGCGG   | AGTATATCTA    | CAACAAATAC  |
| 241  | AAAAACGAAA  | AGACTIONTGGCGG | CATCATTGAT    | CATGATGACA    | GCTIONTGGGTAT | CACGAAAGTC  |
| 301  | CGAGAACCAA  | TCGGTATTGT     | CGCGGCAAT     | GTCCCGACCA    | CTAATCCGAC    | CAGCACCGCG  |
| 361  | ATCTTCAAGA  | GCTTGATCAG     | CCTGAAAACC    | CGCAACGCGA    | TTTTCTTCAG    | CCCGCACCCG  |
| 421  | CGTGCGAAGA  | AGAGCACCAT     | CGCAGCGGCG    | AAGCTGATTT    | TGGATGCCCG    | GGTTAAGGCC  |
| 481  | GGTGCACCGA  | AAAACATTAT     | TGGCTGGATT    | GACGAGCCGA    | GCATTGAGCT    | GTCTCAGGAC  |
| 541  | CTGATGAGCG  | AAGCGGACAT     | TATCTTGGCC    | ACCGTGGTTC    | CGTCTATGGT    | TAAGGCAGCG  |
| 601  | TACTCCAGCG  | GTAAGCCTGC     | TATCGGCGTT    | GGTGCGGGCA    | ATACGCCGGC    | TATCATCGAT  |
| 661  | GAAAGCGCGG  | ATATTGATAT     | GGCAGTTAGC    | TCCATCATT     | TGTCCGCGAC    | CTACGACAAT  |
| 721  | GGTGTATCT   | GTGCAAGCGA     | GCAAAAGCATC   | CTGGTGTGTA    | ATAGCATTTA    | CGAGAACGTC  |
| 781  | AAAGAAAGT   | TTGTTAAGCG     | TGGTTCCCTAT   | ATTCTGAACC    | AGAACGAGAT    | TGCAAAAATC  |
| 841  | AAAGAAACGA  | TGTTAAGAA      | TGGCGCGATT    | AATGCAGATA    | TTGTTGGTAA    | GTCCGCATAC  |
| 901  | ATTATCGCGA  | AGATGGCGGG     | TATCGAAGTG    | CCGCAAACCA    | CCAAAATCTT    | GATCGGCGAA  |
| 961  | GTGCAGAGCG  | TGGAGGCGAG     | CGACTIONGTTC  | AGCAAAGAGA    | ACTIONGAGCCC  | GGTTCTGGCT  |
| 1021 | ATGTACAAA   | TGAAGGACTT     | TGACGAAGCC    | CTGAAGCTGG    | CTCAGCGTCT    | GATTGAGCTG  |
| 1081 | GGCGGCAGCG  | GTACACAGG      | CAGCCTGTAT    | ATCGATAGCC    | AAAACAATAA    | GGACAAGGTG  |
| 1141 | AAAGAGTTTCG | GTCTGGCGAT     | GAAAACCTCT    | CGCACGTTTA    | TCAACATGCC    | GAGCACGCCAA |
| 1201 | GGTGCAGAGCG | GCGATCTGTA     | TACTIONTTCGCA | ATCGCGCCTT    | CTTTTACGCT    | GGGTTGCGGT  |
| 1261 | ACCTGGGGCG  | GTAATTTCGGT    | GAGCCAGAAT    | GTCGAGCCGA    | AGCACCTGCT    | GAACATCAAA  |
| 1321 | TCGGTTCGCGG | AGCGCCGTGA     | GAAGAGACCG    | TGTTTCAAAG    | TCCCACAGAA    | AATTTACTTC  |
| 1381 | AAATACGGCT  | GCCTGCGTTT     | CGCGCTGAAA    | GACTIONGAAAG  | ACATGAACAA    | AAAGCGTGCG  |
| 1441 | TTCATTGTTA  | CCGACAAAGA     | CCTGTTCAAA    | CTGGGTTACG    | TGAACAAAAT    | CACCAAAGTT  |
| 1501 | CTGGATGAAA  | TTGACATCAA     | GTACTIONCAT   | TTCATIONGATA  | TCAAATCCGA    | CCCAACGATT  |
| 1561 | GATAGCGTGA  | AAAAGGGCGC     | TAAAGAAATG    | CTGAACITTTG   | AACCGGACAC    | CATCATCAGC  |
| 1621 | ATCGGTGGTG  | GCTCTCCTAT     | GGATGCTGCG    | AAGGTCATGC    | ACCTGCTGTA    | CGAATACCCG  |
| 1681 | GAAGCGGAAA  | TCGAAAACCT     | GGCTATCAAC    | TTCATGGACA    | TCCGCAAACG    | TATCTGCAAC  |
| 1741 | TTCCCGAAGC  | TGGGCACTAA     | AGCTATTTCC    | GTTGCCATCC    | CGACTACCGC    | GGGCACTGGT  |
| 1801 | TCCGAAGCCA  | CGCCGTTCGC     | CGTATCACC     | AACGATGAAA    | CCGGTATGAA    | ATACCCCGTG  |
| 1861 | ACCTCTTACG  | AACTGACCCC     | GAACATGGCA    | ATTATCGACA    | CCGAGCTGAT    | GCTGAACATG  |
| 1921 | CCGCGCAAGC  | TGACCGCTGC     | TACCGGCATC    | GACGCTCTGG    | TACATGCTAT    | TGAGGCGTAT  |
| 1981 | TTTTCCGTGA  | TGGCTACCGA     | TTACACCGAC    | GACTIONGGCC   | TGCGTGCATG    | CAAAATGATT  |
| 2041 | TTCAAGTACC  | TGCCCTCGCG     | TTACAAAAAC    | GGCACGAATG    | ACATCGAGGC    | GCGTGAGAAA  |
| 2101 | ATGGCCCATG  | CAAGCAACAT     | CGCGGGCATG    | GCCTTCGCCA    | ACGCGTTCCT    | GGGCGTGTGC  |
| 2161 | CACTCTATGG  | CTCACAAACT     | GGGTGCTATG    | CACCACGTGC    | CGCACGGTAT    | CGCGTGTGCT  |
| 2221 | GTCCGTATCG  | AAGAAGTAAT     | TAAGTACAAC    | GCTACTGATT    | GCCCCACTAA    | ACAGACCGCC  |
| 2281 | TTCCACAGT   | ACAAATCTCC     | TAACGCTAAA    | CGTAAGTACG    | CTGAGATCGC    | CGAATACCTG  |
| 2341 | AACCTGAAGG  | GTACGAGCGA     | CACTIONGAGAAA | GTTACTGCGC    | TGATCGAAGC    | TATCTCTAAA  |

2401 CTGAAAATTG ACCTGTCCAT CCCGAGAAC ATCAGCGCCG CAGGCATCAA CAAAAAGGAC  
2461 TTTTACAACA CGCTGGACAA AATGAGCGAA CTGGCTTTTG ACGACCAGTG CACCACTGCA  
2521 AACC CGGTT ACCCGCTGAT CTCTGAGCTG AAAGACATTT ATATCAAATC TTTTAA

**AdhE2.60 (76989)**

1 ATGAAAGTGA CGAACCAAAA AGAACTGAAA CAAAAACTGA ATGAACTGCG TGAGGCCAG  
61 AAAAAAGTTCG CTACGTATAC CCAGGAGCAA GTTGACAAGA TCTTCAAACA GTGTGCCATT  
121 GCGGCTGCCA AAGAGCGTAT TAACTTGGCC AAAGTGGCGG TGAAGAAAAC CGGCATCGGT  
181 CTGGTCGAGG ACAAGATTAT CAAGAATCAC TTTGCCGCGG AGTATATCTA CAACAAATAC  
241 AAAAAACGAAA AGACTTGC GG CATCATTGAT CATGATGACA GCTTGGGTAT CACGAAAGTC  
301 GCAGAACCAA TCGGTATTGT CGCGCAATT GTCCCGACCA CTAATCCGAC CAGCACCAGC  
361 ATCTTCAAGA GCTTGATCAG CCTGAAAACC CGCAACGCGA TTTTCTTCAG CCCGCACCCG  
421 CGTGCGAAGA AGAGCACCAT CGCAGCGGCG AAGCTGATTT TGGATGCCGC GGTAAAGGCC  
481 GGTGCACCGA AAAACATTAT TGGCTGGATT GACGAGCCGA GCATTGAGCT GTCTCAGGAC  
541 CTGATGAGCG AAGCGGACAT TATTCTGGCC ACCGGTGGTC CGTCTATGGT TAAGGCAGCG  
601 TACTCCAGCG GTAAGCCTGC TATCGCGGTT TATCGCGGCA ATACGCCGGC TATCATCGAT  
661 GAAAGCGCGG ATATTGATAT GGCAGTTAGC TCCATCATTC TGTCCAAAAC CTACGACAAT  
721 GGTGTTATCT GTGCAAGCGA GCAAAGCATC CTGGTGATGA ATAGCATTTA CGAGAAGGTC  
781 AAAGAAGAGT TTGTTAAGCG TGTTTCCCTAT ATTCTGAACC AGAACGAGAT TGCAAAAATC  
841 AAAGAAACGA TGTTTAAGAA TGCGCGGATT AATGCAGATA TTGTTGGTAA GTCCGCATAC  
901 ATTATCGCGA AGATGGCGGG TATCGAAGTG CCGCAAACCA CCAAAATCTT GATCGGCGAA  
961 GTGCAGAGCG TGGAGGCGAG CGAACTGTTC AGCCATGAGA AACTGAGCCC GGTCTGGCT  
1021 ATGTACAAAG TGAAGCACTT TGACGAAGCC CTGAAGAAAAG CTCAGCGTCT GATTAACCTG  
1081 GGCGCAGCC ACCACACGAG CAGCCTGTAT ATCGATAGCC AAAACAATAA GGACAAGGTG  
1141 AAAGAGTTCG GTCTGGCGAT GAAAACCTCT CGCACGTTTA TCAACATGCC GAGCAGCCAA  
1201 GGTGCGAGCG GCGATCTGTA TAACTTCGCA ATCGCGCCTT CTTTTACGCT GGGTTGCGGT  
1261 ACCTGGGGCG GTAATTCGGT GAGCCAGAAT GTCGAGCCGA AGCACCTGCT GAACATCGTT  
1321 TCGGTCGCGG AGCGCCGTGA GAAGAGACCT TGGTTCAAAG TCCCACAGAA AATTTACTTC  
1381 AAATAAGGCT GCCTGCGTTC CGCTGAAAAG GAACTGAAAAG ACATGAACAA AAAGCGTCGC  
1441 TTCATTGTTA CCGACAAAAG CCTGTTCAAA CTGGGTTACG TGAACAAAAT CACCAAAGTT  
1501 CTGGATGAAA TTGACATCAA GTACTCCATC TTCACTGATA TCAAATCCGA CCCAACGATT  
1561 GATAGCGTGA AAAAGGGCGC TAAAGAAATG CTGAACTTTG AACCGGACAC CATCATCAGC  
1621 ATCGTGGTGT GCTCTCCTAT GGATGCTGCG AAGGTCATGC ACCTGCTGTA CGAATACCCG  
1681 GAAGCGGAAA TCGAAAACCT GGCTATCAAC TTCATGGACA TCCGCAAACG TATCTGCAAC  
1741 TTCCCGAAGC TGGGCACTAA AGCTATTTCC GTTGCCATCC CGACTACCGC GGGCCTGGT  
1801 TCCGAAGCCA CGCCGTTCGC CGTGATCACC AACGATGAAA CCGGTATGAA ATACCCGCTG  
1861 ACCTCTTACG AACTGACCCC GAACATGGCA ATTATCGACA CCGAGCTGAT GCTGAACATG  
1921 CCGCGCAAGC TGACCGCTGC TACC GG CATC GACGCTCTGG TACATGCTAT TGAGGCGTAC  
1981 GTTTCCGTGA TGGTACC GA TTACACCGAC GAACTGGCCC TCGGTGCGAT CAAAATGATT  
2041 TTCAAGTACC TGCCTCGCGC TTACAAAAAC GCACGAATG ACATCGAGGC GCGTGAGAAA  
2101 ATGGCCCATG CAAGCAACAT CGCGGGCATG GCCTTCGCCA ACGCGTTCC TGGCGTGTGC  
2161 CACTCTATGG CTCACAAACT GGGTGTATG CACCACGTGC CGCACGATAT CGCGTGTGCT  
2221 GTCTTCAATG AAGAGTAAT TAAGTACAAC GCTACTGATT GCCCGACTAA ACAGCCGCC  
2281 TTCCACAGT ACAAATCTCC TAACGCTAAA CGTAAGTACG CTGAGATCGC CGAATACCTG  
2341 AACCTGAAGG GTACGAGCGA CACTGAGAAA GTTACTGCGC TGATCGAAGC TATCTCTAAA  
2401 CTGAAAATTG ACCTGTCCAT CCCGAGAAC ATCAGCGCCG CAGGCATCAA CAAAAAGGAC  
2461 TTTTACAACA CGCTGGACAA AATGAGCGAA CTGGCTTTTG ACGACCAGTG CACCACTGCA  
2521 AACC CGGTT ACCCGCTGAT CTCTGAGCTG AAAGACATTT ATATCAAATC TTTTAA

**AdhE2.61 (76990)**

1 ATGAAAGTGA CGAACCAAAA AGAACTGAAA CAAAAACTGA ATGAACTGCG TGAGGCCAG  
61 AAAAAAGTTCG CTAGCTATAC CCAGGAGCAA GTTGACAAGA TCTTCAAACA GTGTGCCATT  
121 GCGGCTGCCA AAGAGCGTAT TAACTTGGCC AAAGTGGCGG TGAAGAAAAC CGGCATCGGT  
181 CTGGTCGAGG ACAAGATTAT CAAGAATCAC TTTGCCGCGG AGTATATCTA CAACAAATAC  
241 AAAAAACGAAA AGACTTGC GG CATCATTGAT CATGATGACA GCTTGGGTAT CACGAAAGTC  
301 GCAGAACCAA TCGGTATTGT CGCGCAATT GTCCCGACCA CTAATCCGAC CAGCACCAGC  
361 ATCTTCAAGA GCTTGATCAG CCTGAAAACC CGCAACGCGA TTTTCTTCAG CCCGCACCCG  
421 CGTGCGAAGA AGAGCACCAT CGCAGCGGCG AAGCTGATTT TGGATGCCGC GGTAAAGGCC  
481 GGTGCACCGA AAAACATTAT TGGCTGGATT GACGAGCCGA GCATTGAGCT GTCTCAGGAC  
541 CTGATGAGCG AAGCGGACAT TATTCTGGCC ACCGGTGGTC CGTCTATGGT TAAGGCAGCG  
601 TACTCCAGCG GTAAGAAAAG TATCGCGGTT GGTGCGGGCA ATACGCCGGC TATCATCGAT  
661 GAAAGCGCGG ATATTGATAT GGCAGTTAGC TCCATCATTC TGTCCAAAAC CTACGACAAT

721 GGTGTATCT GTGCAAGCGA GCAAAGCATC CTGGTGATGA ATAGCATTTA CGAGAAGGTC  
781 AAAGAAGAGT TTGTTAAGCG TGGTTCCTAT ATTCTGAACC AGAACGAGAT TGCAAAAATC  
841 AAAGAAACGA TGTTAAGAA TGGCGCGATT AATGCAGATA TTGTTGGTAA GTCCGCATAC  
901 ATTATCGCGA AGATGGCGGG TATCGAAGTG CCGCAATACA CAAAATCTT GATCGGCGAA  
961 GTGCAGAGCG TGGAGAAGAG CGAACTGTTT AGCCATGAGA AACTGAGCCC GGTTCCTGGCT  
1021 ATGTACAAAG TGAAGGACTT TGACGAAGCC CTGAAGAAAG CTCAGCGTCT GATTGAGCTG  
1081 GGCGGCAGCG GTCACACGAG CAGCCTGTAT ATCGATAGCC AAAACAATAA GGACAAGGTG  
1141 AAAGAGTTCG GTCTGGCGAT GAAAACCTCT CGCTTCTTTA TCAACATGCC GAGCAGCCAA  
1201 GGTGCGAGCG GCGATCTGTA TAACTTCGCA ATCGCGCCTT CTTTTACGCT GGGTTGCGGT  
1261 ACCTGGGGCG GTAATTCGGT GAGCCAGAAT GTCGAGCCGA AGCACCTGCT GAACATCAAA  
1321 TCCGTCGCGG AGCCCGTGA GAAGAGACCG TGGTTCAAAG TCCCACAGAA AATTTACTTC  
1381 AAATACGGCT GCCTGCGTTT CGCGCTGAAA GAACTGAAAG ACATGAACAA AAAGCGTGCG  
1441 TTCATTGTTA CCGACAAAGA CCTGTTCAAA CTGGGTTACG TGAACAAAAT CACCAAAGTT  
1501 CTGGATGAAA TTGACATCAA GTACTCCATC TTCACTGATA TCAAATCCGA CCCAACGATT  
1561 GATAGCGTGA AAAAGGGCGC TAAAGAAATG CTGAACTTTG AACCGGACAC CATCATCAGC  
1621 ATCGGTGGTG GCTCTCCTAT GGATGCTGCG AAGGTCATGC ACCTGCTGTA CGAATACCCG  
1681 GAAGCGGAAA TCGAAAACCT GGCTATCAAC TTCATGGACA TCCGAAACG TATCTGCAAC  
1741 TTCCCGAAGC TGGGCACTAA AGCTATTTCC GTTGCCATCC CGACTACCGG GGCACCTGGT  
1801 TCCGAAGCCA CGCCGTTGCG CGTGATCACC AACGATGAAA CCGGTATGAA ATACCCGCTG  
1861 ACCTCTTACG AACTGACCCC GAACATGGCA ATTATCGACA CCGAGCTGAT GCTGAACATG  
1921 CCGCGCAAGC TGACCGCTGC TACCGGCATC GACGCTCTGG TACATGCTAT TGAGGCGTAC  
1981 GTTTCGCTGA TGGTACCGA TTACACCGAC GAACTGGCCC TGCGTGCGAT CAAAATGATT  
2041 TTCAAGTACC TGCCTCGCGC TTACAAAAAC GGCACGAATG ACATCGAGGC GCGTGAGAAA  
2101 ATGGCCCATG CAAGCAACAT CGCGGGCATG GCCTTCGCCA ACGCGTTCCT GGGCGTGTGC  
2161 CACTCTATGG CTCACAAACT GGTGCTATAG CACCACGTGC CGCACGGTAT CGCGTGTGCT  
2221 GTCCTGATCG AAGAAGTAAT TAAGTACAAC GCTACTGATT GCCCGACTAA ACAGACCGCC  
2281 TTCCACAGT ACAAATCTCC TAACGCTAAA CGTAAGTACG CTGAGATCGC CGAATACCTG  
2341 AACCTGAAGG GTACGAGCGA CACTGAGAAA GTTACTGCGC TGATCGAAGC TATCTCTAAA  
2401 CTGAAAATTG ACCTGTCCAT CCCGAGAAC ATCAGCGCCG CAGGCATCAA CAAAAGGAC  
2461 TTTTACAACA CGCTGGACAA AATGAGCGAA CTGGCTTTTG ACGACCAGTG CACCCTGCA  
2521 AACCCGCGTT ACCCGCTGAT CTCTGAGCTG AAAGACATTT ATATCAAATC TTTTTAA

**AdhE2.62 (76991)**

1 ATGAAAGTGA CGAACCAAAA AGAACTGAAA CAAAACTGA ATGAACTGCG TGAGGCCCGAG  
61 AAAAAGTTCG CTACGTATAC CCAGGAGCAA GTTGACAAGA TCTTCAAACA GTGTGCCATT  
121 GCGGCTGCCA AAGAGCGTAT TAACTTGGCC AAAGTGGCGG TGAAGAAAC CGGCATCGGT  
181 CTGGTCGAGG ACAAGATTAT CAAGAATCAC TTTGCCGCGG AGTATATCTA CAACAAATAC  
241 AAAAACGAAA AGACTTGCGG CATCATTGAT CATGATGACA GCTTGGGTAT CACGAAAGTC  
301 GCAGAACCAA TCGGTATTGT CGCGGCAATT GTCCCGACCA CTAATCCGAC CAGCACCAGC  
361 ATCTTCAAGA GCTTGATCAG CCTGAAAACC CGCAACGCGA TTTTCTTCAG CCCGCACCCG  
421 CGTGCGAAGA AGAGCACCAT CGCAGCGGCG AAGCTGATTT TGGATGCCGC GGTAAAGGCC  
481 GGTGCACCGA AAAACATTAT TGGCTGGATT GACGAGCCGA GCATTGAGCT GTCTCAGGAC  
541 CTGATGAGCG AAGCGGACAT TATTCTGGCC ACCGGTGGTC CGTCTATGGT TAAGGCAGCG  
601 TACTCCAGCG GTAAGCCTGC TATCGGCGTT GGTGCGGGCA ATACGCCGGC TATCATCGAT  
661 GAAAGCGCGG ATATTGATAT GGCAGTTAGC TCCATCATTC TGTCCAAAAC CTACGACAAT  
721 GGTGTATCT GTGCAAGCGA GCAAAGCATC CTGGTGATGA ATAGCATTTA CGAGAAGGTC  
781 AAAGAAGAGT TTGTTAAGCG TGGTTCCTAT ATTCTGAACC AGAACGAGAT TGCAAAAATC  
841 AAAGAAACGA TGTTAAGAA TGGCGCGATT AATGCAGATA TTGTTGGTAA GTCCGCATAC  
901 ATTATCGCGA AGATGGCGGG TATCGAAGTG CCGCAATACA CAAAATCTT GATCGGCGAA  
961 GTGCAGAGCG TGGAGAAGAG CGAACTGTTT AGCCATGAGA AACTGAGCCC GGTTCCTGGCT  
1021 ATGTACAAAG TGAAGGACTT TGACGAAGCC CTGAAGCTGG CTCAGCGTCT GATTACCTG  
1081 GGCGGCAGCG GTCACACGAG CAGCCTGTAT ATCGATAGCC AAAACAATAA GGACAAGGTG  
1141 AAAGAGTTCG GTCTGGCGAT GAAAACCTCT CGCACGTTTA TCAACATGCC GAGCAGCCAA  
1201 GGTGCGAGCG GCGATCTGTA TAACTTCGCA ATCGCGCCTT CTTTTACGCT GGGTTGCGGT  
1261 ACCTGGGGCG GTAATTCGGT GAGCCAGAAT GTCGAGCCGA AGCACCTGCT GAACATCAAA  
1321 TCCGTCGCGG AGCCCGTGA GAAGAGACCG TGGTTCAAAG TCCCACAGAA AATTTACTTC  
1381 AAATACGGCT GCCTGCGTTT CGCGCTGAAA GAACTGAAAG ACATGAACAA AAAGCGTGCG  
1441 TTCATTGTTA CCGACAAAGA CCTGTTCAAA CTGGGTTACG TGAACAAAAT CACCAAAGTT  
1501 CTGGATGAAA TTGACATCAA GTACTCCATC TTCACTGATA TCAAATCCGA CCCAACGATT  
1561 GATAGCGTGA AAAAGGGCGC TAAAGAAATG CTGAACTTTG AACCGGACAC CATCATCAGC  
1621 ATCGGTGGTG GCTCTCCTAT GGATGCTGCG AAGGTCATGC ACCTGCTGTA CGAATACCCG  
1681 GAAGCGGAAA TCGAAAACCT GGCTATCAAC TTCATGGACA TCCGAAACG TATCTGCAAC

1741 TTCCCGAAGC TGGGCACTAA AGCTATTTCC GTTGCCATCC CGACTACCGC GGGCACTGGT  
1801 TCCGAAGCCA CGCCGTTTCG CCGTATCACC AACGATGAAA CCGGTATGAA ATACCCGCTG  
1861 ACCTCTTACG AACTGACCCC GAACATGGCA ATTATCGACA CCGAGCTGAT GCTGAACATG  
1921 CCGCGCAAGC TGACCGCTGC TACCGGCATC GACGCTCTGG TACATGCTAT TGAGGCGTAC  
1981 GTTTCCGTGA TGGCTACCGA TTACACCGAC GAACTGGCCC TGCGTGCAT CAAAATGATT  
2041 TTCAAGTACC TGCCTCGCGC TTACAAAAAC GGCACGAATG ACATCGAGGC GCGTGAGAAA  
2101 ATGGCCCATG CAAGCAACAT CGCGGGCATG GCCTTCGCCA ACGCGTTTCT GGGCGTGTGC  
2161 CACTCTATGG CTCACAAACT GGGTGTATG CACCACGTGC CGCACGGTAT CGCGTGTGCT  
2221 GTCCTGATCG AAGAAGTAAT TAAGTACAAC GCTACTGATT GCCCGACTAA ACAGACCGCC  
2281 TTCCACAGT ACAAATCTCC TAACGCTAAA CGTAAGTACG CTGAGATCGC CGAATACCTG  
2341 AACCTGAAGC TACGAGCGA CACTGAGAAA GTTACTGCGC TGATCGAAGC TATCTCTAAA  
2401 CTGAAAATTG ACCTGTCCAT CCCGCAGAAC ATCAGCGCCG CAGGCATCAA CAAAAGGAC  
2461 TTTTACAACA CGCTGGACAA AATGAGCGAA CTGGCTTTTG ACGACCAGTG CACCACTGCA  
2521 AACCCGCGTT ACCCGCTGAT CTCTGAGCTG AAAGACATTT ATATCAAATC TTTTTAA

**AdhE2.63 (76992)**

1 ATGAAAGTGA CGAACCAAAA AGAACTGAAA CAAAACTGA ATGAACTGCG TGAGGCCAG  
61 AAAAAAGTTCG CTACGTGCAC CCAGGAGCAA GTTGACAAGA TCTTCAAACA GTGTGCCATT  
121 GCGGTGCGCA AAGAGCGTAT TAACTTGGCC AAAGTGGCGG TGAAGAAAAC CGGCATCGGT  
181 CTGGTTCGAGG ACAAGATTAT CAAGAATCAC TTTGCCGCGG AGTATATCTA CAACAAAGAG  
241 AAAAAAGTTCG CTACGTGCAC CCAGGAGCAA GTTGACAAGA TCTTCAAACA GTGTGCCATT  
301 GCAGAACCAA TCGGTATTGT CGCGGCAATT GTCCCGACCA CTAATCCGAC CAGCAACGCG  
361 ATCTTCAAGA GCTTGATCAG CCTGAAAACC CGCAACGCGA TTTTCTTCAG CCCGCACCCG  
421 CGTGCGAAGA AGAGCACCAT CGCAGCGGCG AAGCTGATTT TGGATGCCGC GGTTAAGGCC  
481 GGTGCACCGA AAAACATTAT TGGCTGGATT GACGAGCCGA GCATTGAGCT GTCTCAGGAC  
541 CTGATGAGCG AAGCGGACAT TATCTTGGCC ACCGGTGGTC CGTCTATGGT TAAGGCAGCG  
601 TACTCCAGCG GTAAGCCTGC TATCGGCGTT GGTGCGGGCA ATACGCCGGC TATCATCGAT  
661 GAAAGCGCGG ATATTGATAT GGCAGTTAGC TCCATCATT TGTCCAAAAC CTACGACAAT  
721 GGTGTATCT GTGCAAGCGA GCAAAGCATC CTGGTGATGA ATAGCATTTA CGAGAAGGTC  
781 AAAGAAGAGT TTGTTAAGCG TGGTTCCTAT ATTCTGAACC AGAACGAGAT TGCAAAAATC  
841 AAAGAAACGA TGTTAAGAA TGGCGCGATT AATGCAGATA TTGTTGGTAA GTCCGCATAC  
901 ATTATCGCGA AGATGGCGGG TATCGAAGTG CGCAAACCA CCAAATCTT GATCGGCGAA  
961 GTGCAGAGCG TGGAGAAGAG CGAACTGTTT AGCCATGAGA AACTGAGCCC GGTTCCTGGCT  
1021 ATGTACAAA TGAAGGACTT TGACGAAGCT CTGGACAAAG CTCAGCGTCT GATTGAGCTG  
1081 GCGCGCAGCG GTCACACGAG CAGCTGTAT ATCGATAGCC AAAACAATAA GGACAAGCTG  
1141 AAAGAGTTCG GTCTGCGTAT GAAAACCTCT CGCACGTTTA TCAACATGCC GAGCAGCCAA  
1201 GGTGCAGAGCG GCGATCTGTA TAACTTCGCA ATCGCGCCTT CTTTTACGCT GGGTTGCGGT  
1261 ACCTGGGGCG GTAATTCGGT GAGCCAGAAT GTCGAGCCGA AGCACCTGCT GAACATCAA  
1321 TCGTTCGCGG AGCGCCGTGA GAAGAGACCG TGGTTCAAAG TCCCACAGAA AATTTACTTC  
1381 AAATACGGTT GCCTGCGTTT CGCGCTGAAA GAACTGAAAG ACATGAACAA AAAGCGTGCG  
1441 TTCATTGTTA CCGACAAAGA CCTGTTCAA CTGGGTTACG TGAACAAAAT CACCAAAGTT  
1501 CTGGATGAAA TTGACATCAA GTACTCCATC TCACTGATA TCAAATCCGA CCCAACGATT  
1561 GATAGCGTGA AAAAGGGCGC TAAAGAAATG CTGAACTTTG AACCGGACAC CATCATCAGC  
1621 ATCGGTGGTG GCTCTCCTAT GGATGCTGCG AAGGTCATGC ACCTGCTGTA CGAATACCCG  
1681 GAAGCGGAAA TCGAAAACCT GGCTATCAAC TTCATGGACA TCCGCAAACG TATCTGCAAC  
1741 TTCCCGAAGC TGGGCACTAA AGCTATTTCC GTTGCCATCC CGACTACCGC GGGCACTGGT  
1801 TCCGAAGCCA CGCCGTTTCG CCGTATCACC AACGATGAAA CCGGTATGAA ATACCCGCTG  
1861 ACCTCTTACG AACTGACCCC GAACATGGCA ATTATCGACA CCGAGCTGAT GCTGAACATG  
1921 CCGCGCAAGC TGACCGCTGC TACCGGCATC GACGCTCTGG TACATGCTAT TGAGGCGTAC  
1981 GTTTCCGTGA TGGCTACCGA TTACACCGAC GAACTGGCCC TGCGTGCAT CAAAATGATT  
2041 TTCAAGTACC TGCCTCGCGC TTACAAAAAC GGCACGAATG ACATCGAGGC GCGTGAGAAA  
2101 ATGGCCCATG CAAGCAACAT CGCGGGCATG GCCTTCGCCA ACGCGTTTCT GGGCGTGTGC  
2161 CACTCTATGG CTCACAAACT GGGTGTATG CACCACGTGC CGCACGGTAT CGCGTGTGCT  
2221 GTCCTGATCG AAGAAGTAAT TAAGTACAAC GCTACTGATT GCCCGACTAA ACAGACCGCC  
2281 TTCCACAGT ACAAATCTCC TAACGCTAAA CGTAAGTACG CTGAGATCGC CGAATACCTG  
2341 AACCTGAAGG GTACGAGCGA CACTGAGAAA GTTACTGCGC TGATCGAAGC TATCTCTAAA  
2401 CTGAAAATTG ACCTGTCCAT CCCGCAGAAC ATCAGCGCCG CAGGCATCAA CAAAAGGAC  
2461 TTTTACAACA CGCTGGACAA AATGAGCGAA CTGGCTTTTG ACGACCAGTG CACCACTGCA  
2521 AACCCGCGTT ACCCGCTGAT CTCTGAGCTG AAAGACATTT ATATCAAATC TTTTTAA

**AdhE2.64 (76993)**

1 ATGAAAGTGA CGAACCAAAA AGAACTGAAA CAAAACTGA ATGAACTGCG TGAGGCCAG



|      |             |            |             |            |            |             |
|------|-------------|------------|-------------|------------|------------|-------------|
| 61   | AAAAAGTTCG  | CTACGTATAC | CCAGGAGCAA  | GTTGACAAGA | TCTTCAAACA | GTGTGCCATT  |
| 121  | GCGGCTGCCA  | AACTGCGTAT | TAAGCTGGCC  | AACTGGCGG  | TGGAAGAAAC | CGGCATCGGT  |
| 181  | CTGGTCGAGG  | ACAAGATTAT | CAAGAATCAC  | TTTGCCGCGG | AGTATATCTA | CAACAAATAC  |
| 241  | AAAAACGAAA  | AGACTTGCGG | CATCATTGAT  | CATGATGACA | GCTTGGGTAT | CACGAAAGTC  |
| 301  | GCAGAACCAA  | TCGGTATTGT | CGCGGCAATT  | GTCCCGACCA | CTAATCCGAC | CAGCACCGCG  |
| 361  | ATCTTCAAGA  | GCTTGATCAG | CCTGAAAACC  | CGCAACGCGA | TTTTCTTCAG | CCCGCACCCG  |
| 421  | CGTGCGAAGA  | AGAGCACCAT | CGCAGCGGCG  | AAGCTGATTT | TGGATGCCCG | GGTTAAGGCC  |
| 481  | GGTGACCCGA  | AAAACATTAT | TGGCTGGATT  | GACGAGCCGA | GCATTGAGCT | GTCTCAGGAC  |
| 541  | CTGATGAGCG  | AAGCGGACAT | TATTCTGGCC  | ACCGGTGGTC | CGTCTATGGT | TAAGGCAGCG  |
| 601  | TACTCCAGCG  | GTAAGCCTGC | TATCGGCGTT  | GGTGCGGGCA | ATACGCCGGC | TATCATCGAT  |
| 661  | GAAAGCGCGG  | ATATTGATAT | GGCAGTTAGC  | TCCATCATT  | TGTCCAAAAC | CTACGACAAT  |
| 721  | GGTGTATCT   | GTGCAAGCGA | GCAAAGCATC  | CTGGTGATGA | ATAGCATTTA | CGAGAAGGTC  |
| 781  | AAAGAAGAGT  | TTGTTAAGCG | TGGTTCCTAT  | ATTCTGAACC | AGAACGAGAT | TGCAAAAATC  |
| 841  | AAAGAAACGA  | TGTTAAGAA  | TGGCGCGATT  | AATGCAGATA | TTGTTGGTAA | GTCCGCATAC  |
| 901  | ATTATCGCGA  | AGATGGCGGG | TATCGAAGTG  | CCGCAAACCA | CCAAAATCTT | GATCGGCGAA  |
| 961  | GTGCAGAGCG  | TGGAGAAGAG | CGAACTGTT   | AGCCATGAGA | AACTGAGCCC | GGTTCCTGGCT |
| 1021 | ATGTACAAAAG | TGAAGGACTT | TGACGAAGCC  | CTGAAGAAAG | CTGAGCGTCT | GATTGAGCTG  |
| 1081 | GCGGCGACCG  | GTCACACGAG | CAGCCTGTAT  | ATCGATAGCC | AAAACAATAA | GGACAAGGTG  |
| 1141 | AAAGAGTTCG  | GTCTGCGTAT | GAAAACCTCT  | CGCACGTTTA | TCAACATGCC | GAGCAGCCAA  |
| 1201 | GGTGCAGAGCG | GCGATCTGTA | TAAGCTTCGCA | ATCGCGCCTT | CTTTTACGCT | GGCGTGCAGG  |
| 1261 | ACCTGGGGCG  | GTAATTCGGT | GAGCCAGAAT  | GTCGAGCCGA | AGCACCTGCT | GAACATCAAA  |
| 1321 | TCGGTTCGCGG | AGCGCCGTGA | GAAGAGACCG  | TGGTTCAAAG | TCCCACAGAA | AATTTACTTC  |
| 1381 | AAATACGGGT  | GCCTGCGTTC | CGCGCTGAAA  | GAAGTGAAG  | ACATGAACAA | AAAGCGTGCG  |
| 1441 | TTCATTGTTA  | CCGACAAAAG | CCTGTTCAA   | CTGGGTTACG | TGAACAAAAT | CACCAAAGTT  |
| 1501 | CTGGATGAAA  | TTGACATCAA | GTACTCCATC  | TTCATGATA  | TCAAATCCGA | CCCAACGATT  |
| 1561 | GATAGCGTGA  | AAAAGGGCGC | TAAAGAAATG  | CTGAAGTTTG | AACCGGACAC | CATCATCAGC  |
| 1621 | ATCGGTGGTG  | GCTCTCCTAT | GGATGCTGCG  | AAGGTCATGC | ACCTGCTGTA | CGAATACCCG  |
| 1681 | GAAGCGGAAA  | TCGAAAACCT | GGTATCAAC   | TTCATGGACA | TCCGCAAACG | TATCTGCAAC  |
| 1741 | TTCCCGAAGC  | TGGGCACTAA | AGCTATTTCC  | GTTGCCATCC | CGACTACCGC | GGGCACTGGT  |
| 1801 | TCCGAAGCCA  | CGCCGTTCCG | CGTGATCACC  | AACGATGAAA | CCGGTATGAA | ATACCCGCTG  |
| 1861 | ACCTCTTACG  | AACTGACCCC | GAACATGGCA  | ATTATCGACA | CCGAGCTGAT | GCTGAACATG  |
| 1921 | CCCGCAAGC   | TGACCGCTGC | TACCGGCATC  | GACGCTCTGG | TACATGCTAT | TGAGGCGTAC  |
| 1981 | GTTTCCGTGA  | TGGTACCGA  | TTACACCGAC  | GAAGTGGCCC | TGCGTGCGAT | CAAAAATGATT |
| 2041 | TTCAAGTACC  | TGCCTCGCGC | TTACAAAAC   | GGCACGAATG | ACATCGAGGC | GCGTGAGAAA  |
| 2101 | ATGGCCCATG  | CAAGCAACAT | CGCGGGCATG  | GCCTTCGCCA | ACGCGTTCC  | GGGCGTGTGC  |
| 2161 | CACCTATATG  | CTCACAAACT | GGGTGCTATG  | CACCACGTGC | CGCACGGTAT | CGCGTGTGCT  |
| 2221 | GTCTGTATG   | AAGAAGTAAT | TAAGTACAAC  | GCTACTGATT | GCCCAGCTAA | ACAGACCCGC  |
| 2281 | TTCCCATAGT  | ACAAATCTCC | TAACGCTAAA  | CGTAAGTACG | CTGAGATCGC | CGAATACCTG  |
| 2341 | AACCTGAAGG  | GTACGAGCGA | CACTGAGAAA  | GTTACTGCGC | TGATCGAAGC | TATCTCTAAA  |
| 2401 | CTGAAAATTG  | ACCTGTCCAT | CCCGCAGAAC  | ATCAGCGCCG | CAGGCATCAA | CAAAAAGGAC  |
| 2461 | TTTTACAACA  | CGCTGGACAA | AATGAGCGAA  | CTGGCTTTTG | ACGACCAGTG | CACCACTGCA  |
| 2521 | AACCCGCGTT  | ACCCGCTGAT | CTCTGAGCTG  | AAAGACATTT | ATATCAAATC | TTTTTTAA    |

**AdhE2.65 (76994)**

|      |             |            |            |            |            |             |
|------|-------------|------------|------------|------------|------------|-------------|
| 1    | ATGAAAGTGA  | CGAACCAAAA | AGAAGTGAAG | CAAAAAGTGA | ATGAAAGTGC | TGAGGCCCG   |
| 61   | AAAAAGTTCG  | CTACGTATAC | CCAGGAGCAA | GTTGACAAGA | TCTTCAAACA | GTGTGCCATT  |
| 121  | GCGGCTGCCA  | AAGAGCGTAT | TAAGCTGGCC | AACTGGCGG  | TGGAAGAAAC | CGGCATCGGT  |
| 181  | CTGGTCGAGG  | ACAAGATTAT | CAAGAATCAC | TTTGCCGCGG | AGTATATCTA | CAACAAATAC  |
| 241  | AAAAACGAAA  | AGACTTGCGG | CATCATTGAT | CATGATGACA | GCTTGGGTAT | CACGAAAGTC  |
| 301  | GCAGAACCAA  | TCGGTATTGT | CGCGGCAATT | GTCCCGACCA | CTAATCCGAC | CAGCACCGCG  |
| 361  | ATCTTCAAGA  | GCTTGATCAG | CCTGAAAACC | CGCAACGCGA | TTTTCTTCAG | CCCGCACCCG  |
| 421  | CGTGCGAAGA  | AGAGCACCAT | CGCAGCGGCG | AAGCTGATTT | TGGATGCCCG | GGTTAAGGCC  |
| 481  | GGTGACCCGA  | AAAACATTAT | TGGCTGGATT | GACGAGCCGA | GCATTGAGCT | GTCTCAGGAC  |
| 541  | CTGATGAGCG  | AAGCGGACAT | TATTCTGGCC | ACCGGTGGTC | CGTCTATGGT | TAAGGCAGCG  |
| 601  | TACTCCAGCG  | GTAAGCCTGC | TATCGGCGTT | GGTGCGGGCA | ATACGCCGGC | TATCATCGAT  |
| 661  | GAAAGCGCGG  | ATATTGATAT | GGCAGTTAGC | TCCATCATT  | TGGGTAAAAC | CTACGACAAT  |
| 721  | GGTGTATCT   | GTGCAAGCGA | GCAAAGCATC | CTGGTGATGA | ATAGCATTTA | CGAGAAGGTC  |
| 781  | AAAGCGGAGT  | TTGTTAAGCG | TGGTTCCTAT | ATTCTGAACC | AGAACGAGAT | TGCAAAAATC  |
| 841  | AAAGAAACGA  | TGTTAAGAA  | TGGCGCGATT | AATGCAGATA | TTGTTGGTAA | GTCCGCATAC  |
| 901  | ATTATCGCGA  | AGATGGCGGG | TATCGAAGTG | CCGCAAACCA | CCAAAATCTT | GATCGGCGAA  |
| 961  | GTGCAGCACG  | TGGAGAAGAG | CGAACTGTT  | AGCCATGAGA | AACTGAGCCC | GGTTCCTGGCT |
| 1021 | ATGTACAAAAG | TGAAGGACTT | TGACGAAGCC | CTGAAGAAAG | CTCAGCGTCT | GATTGAGCTG  |

1081 GCGGCGAGCG GTCACACGAG CAGCCTGTAT ATCGATAGCC AAAACAATAA GGACAAGGTG  
1141 AAAGAGTTCG GTCTGGCGAT GAAAACCTCT ATCACGTTTA TCAACATGCC GAGCAGCCAA  
1201 GGTGCGAGCG GCGATCTGTA TAACTTCGCA ATCGCGCCTT CTTTTACGCT GGGTTGCGGT  
1261 ACCTGGGGCG GTAATTCGGT GAGCCAGAAT GTCGAGCCGA AGCACCTGCT GAACATCAAA  
1321 TCGGTCGCGG AGCGCCGTGA GAAGAGACCG TGGTTCAAAG TCCCACAGAA AATTTACTTC  
1381 AAATACGGCT GCCTGCGTTT CCGCTGAAA GAACTGAAAG ACATGAACAA AAAGCGTGCG  
1441 TTCATTGTTA CCGACAAAGA CCTGTTCAAA CTGGGTTACG TGAACAAAAT CACCAAAGTT  
1501 CTGGATGAAA TTGACATCAA GTACTCCATC TTCACTGATA TCAAATCCGA CCCAACGATT  
1561 GATAGCGTGA AAAAGGGCGC TAAAGAAATG CTGAACTTTG AACCGGACAC CATCATCAGC  
1621 ATCGGTGGTG GCTCTCCTAT GGATGCTGCG AAGGTCATGC ACCTGCTGTA CGAATACCCG  
1681 GAAGCGGAAA TCGAAAACCT GGCTATCAAC TTCATGGACA TCCGAAAACG TATCTGCAAC  
1741 TTCCCGAAGC TGGGCACTAA AGCTATTTCC GTTGCCATCC CGACTACCGC GGGCACTGGT  
1801 TCCGAAGCCA CGCCGTTGCG CGTGATCACC AACGATGAAA CCGGTATGAA ATACCCGCTG  
1861 ACCTCTTACG AACTGACCCC GAACATGGCA ATTATCGACA CCGAGCTGAT GCTGAACATG  
1921 CCGCGCAAGC TGACCGCTGC TACCGGCATC GACGCTCTGG TACATGCTAT TGAGGCGTAC  
1981 GTTTCGCTGA TGGTACCGA TTACACCGAC GAACTGGCCC TCGGTGCGAT CAAAATGATT  
2041 TTCAAGTACC TGCCTCGCGC TTACAAAAAC GGCACGAATG ACATCGAGGC GCGTGAGAAA  
2101 ATGGCCCATG CAAGCAACAT CGCGGGCATG GCCTTCGCCA ACGCGTTCCT GGGCGTGTGC  
2161 CACTCTATGG CTCACAAACT GGGTGTATG CACCACGTGC CGCACGGTAT CGCGTGTGCT  
2221 GTCCTGATCG AAGAAGTAAT TAAGTACAAC GCTACTGATT GCCCGACTAA ACAGACCGCC  
2281 TTCCACAGT ACAAATCTCC TAACGCTAAA CGTAAGTACG CTGAGATCGC CGAATACCTG  
2341 AACCTGAAGG GTACGAGCGA CACTGAGAAA GTTACTGCGC TGATCGAAGC TATCTCTAAA  
2401 CTGAAAATTG ACCTGTCCAT CCCGAGAAC ATCAGCGCCG CAGGCATCAA CAAAAAGGAC  
2461 TTTTACAACA CGCTGGACAA AATGAGCGAA CTGGCTTTTG ACGACCAGTG CACCCTGCA  
2521 AACCCGCGTT ACCCGCTGAT CTCTGAGCTG AAAGACATTT ATATCAAATC TTTTTAA

**AdhE2.66 (76995 )**

1 ATGAAAGTGA CGAACCAAAA AGAACTGAAA CAAAAACTGA ATGAACTGCG TGAGGCCCGAG  
61 AAAAAGTTCG CTACGTATAC CCAGGAGCAA GTTGACAAGA TCTTCAAACA GTGTGCCATT  
121 GCGGTCGCCA AAGAGCGTAT TAACTTGGCC AAACTGGCGG TGGAAAGAAC CGGCATCGGT  
181 CTGGTCGAGG ACAAGATTAT CAAGAATCAC TTTGCCGCGG AGTATATCTA CAACAAATAC  
241 AAAAACGAAA AGACTTGCGG CATCATTGAT CATGATGACA GCTTGGGTAT CACGAAAGTC  
301 GCAGAACCAA TCGGTATTGT CGCGGCAATT GTCCCGACCA CTAATCCGAC CAGCACCGCG  
361 ATCTTCAAGA GCTTGATCAG CCTGAAAACG CGCAACGCGA TTTTCTTCAG CCCGCACCCG  
421 CTGCGAAGA AGAGCACCAT CGCAGCGGCG AAGCTGATTT TGGATGCCGC GGTAAAGCCG  
481 GGTGCACCGA AAAACATTAT TGGCTGGATT GACGAGCCGA GCATTGAGCT GTCTCAGGAC  
541 CTGATGAGCG AAGCGGACAT TATTCTGGCC ACCGGTGGTC CGTCTATGGT TAAGGCAGCG  
601 TACTCCAGCG GTAAGCCTGC TATCGGCGTT GGTGCGGGCA ATACGCCGGC TATCATCGAT  
661 GAAAGCGCGG ATATTGATAT GGCAGTTAGC TCCATCATTC TGTCGCGGAC CTACGACAAT  
721 GGTGTATCT GTGCAAGCGA GCAAAGCATC CTGGTGATGA ATAGCATTTA CGAGAAGGTC  
781 AAAGAAGAGT TTGTTAAGCG TGGTTCCTAT ATTCTGAACC AGAACGAGAT TGCAAAAATC  
841 AAAGAAACGA GTTTAAGAA TGGCGCGATT AATGCAGATA TTGTTGGTAA TGCCGCATAC  
901 AATTATCGCGA AGATGGCGGG TATCGAAGTG CCGCAAACCA CCAAATCTT GATCGGGCAA  
961 GTGCAGAGCG TGGAGAAGAG CGAACTGTTC AGCCATGAGC TGCTGAGCCC GGTCTGGCT  
1021 ATGTACAAAG TGAAGGACTT TGACGAAGCC CTGAAGAAAG CTCAGCGTCT GATTACCTG  
1081 GCGGCGAGCG GTCACACGAG CAGCCTGTAT ATCGATAGCC AAAACAATAA GGACAAGGTG  
1141 AAAGAGTTCG GTCTGGCGAT GAAAACCTCT ATCACGTTTA TCAACATGCC GAGCAGCCAA  
1201 GGTGCGAGCG GCGATCTGTA TAACTTCGCA ATCGCGCCTT CTTTTACGCT GGGTTGCGGT  
1261 ACCTGGGGCG GTAATTCGGT GAGCCAGAAT GTCGAGCCGA AGCACCTGCT GAACATCAAA  
1321 TCGGTCGCGG AGCGCCGTGA GAAGAGACCG TGGTTCAAAG TCCCACAGAA AATTTACTTC  
1381 AAATACGGCT GCCTGCGTTT CCGCTGAAA GAACTGAAAG ACATGAACAA AAAGCGTGCG  
1441 TTCATTGTTA CCGACAAAGA CCTGTTCAAA CTGGGTTACG TGAACAAAAT CACCAAAGTT  
1501 CTGGATGAAA TTGACATCAA GTACTCCATC TTCACTGATA TCAAATCCGA CCCAACGATT  
1561 GATAGCGTGA AAAAGGGCGC TAAAGAAATG CTGAACTTTG AACCGGACAC CATCATCAGC  
1621 ATCGGTGGTG GCTCTCCTAT GGATGCTGCG AAGGTCATGC ACCTGCTGTA CGAATACCCG  
1681 GAAGCGGAAA TCGAAAACCT GGCTATCAAC TTCATGGACA TCCGAAAACG TATCTGCAAC  
1741 TTCCCGAAGC TGGGCACTAA AGCTATTTCC GTTGCCATCC CGACTACCGC GGGCACTGGT  
1801 TCCGAAGCCA CGCCGTTGCG CGTGATCACC AACGATGAAA CCGGTATGAA ATACCCGCTG  
1861 ACCTCTTACG AACTGACCCC GAACATGGCA ATTATCGACA CCGAGCTGAT GCTGAACATG  
1921 CCGCGCAAGC TGACCGCTGC TACCGGCATC GACGCTCTGG TACATGCTAT TGAGGCGTAC  
1981 GTTTCGCTGA TGGTACCGA TTACACCGAC GAACTGGCCC TCGGTGCGAT CAAAATGATT  
2041 TTCAAGTACC TGCCTCGCGC TTACAAAAAC GGCACGAATG ACATCGAGGC GCGTGAGAAA

|      |             |            |            |            |            |            |
|------|-------------|------------|------------|------------|------------|------------|
| 2101 | ATGGCCATG   | CAAGCAACAT | CGCGGGCATG | GCCTTCGCCA | ACGCGTTCCT | GGGCGTGTGC |
| 2161 | CACTCTATGG  | CTCACAAACT | GGGTGCTATG | CACCACGTGC | CGCACGGTAT | CGCGTGTGCT |
| 2221 | GTCCCTGATCG | AAGAAGTAAT | TAAGTACAAC | GCTACTGATT | GCCCCACTAA | ACAGACCCGC |
| 2281 | TTCCACAGT   | ACAAATCTCC | TAACGCTAAA | CGTAAGTACG | CTGAGATCGC | CGAATACCTG |
| 2341 | AACCTGAAGG  | GTACGAGCGA | CACTGAGAAA | GTTACTGCGC | TGATCGAAGC | TATCTCTAAA |
| 2401 | CTGAAAATTG  | ACCTGTCCAT | CCCGCAGAAC | ATCAGCGCCG | CAGGCATCAA | CAAAAAGGAC |
| 2461 | TTTTACAACA  | CGCTGGACAA | AATGAGCGAA | CTGGCTTTTG | ACGACCAGTG | CACCACTGCA |
| 2521 | AACCCGCGTT  | ACCCGCTGAT | CTCTGAGCTG | AAAGACATTT | ATATCAAATC | TTTTTAA    |

**AdhE2.67 (76996)**

|      |             |             |            |             |            |             |
|------|-------------|-------------|------------|-------------|------------|-------------|
| 1    | ATGAAAGTGA  | CGAACCAAAA  | AGAACTGAAA | CAAAAACCTGA | ATGAACTGCG | TGAGGCCCCAG |
| 61   | AAAAAGTTTCG | CTACGTATAC  | CCAGGAGCAA | GTTGACAAGA  | TCTTCAAACA | GTGTGCCATT  |
| 121  | GCGGCTGCCA  | AAGAGCGTAT  | TAACCTGGCC | AAACTGGCGG  | TGGAAGAAAC | CGGCATCGGT  |
| 181  | CTGGTCGAGG  | ACAAGATTAT  | CAAGAATCAC | TTTGCCGCGG  | AGTATATCTA | CAACAAATAC  |
| 241  | AAAAACGAAA  | AGACTTGCGG  | CATCATTGAT | CATGATGACA  | GCTTGGGTAT | CACGAAAGTC  |
| 301  | GCAGAACCAA  | TCGGTATTGT  | CGCGGCAATT | GTCCCGACCA  | CTAATCCGAC | CAGCACCCGG  |
| 361  | ATCTTCAAGA  | GCTTGATCAG  | CCTGAAAACC | CGCAACGCGA  | TTTTCTTCAG | CCCGCACCCG  |
| 421  | CGTGCGAAGA  | AGAGCACCAT  | CGCAGCGGCG | AAGCTGATTT  | TGGATGCCCG | GGTTAAGGCC  |
| 481  | GGTGCAACCGA | AAAACATTAT  | TGGCTGGATT | GACGAGCCGA  | GCATTGAGCT | GTCTCAGGAC  |
| 541  | CTGATGAGCG  | AAGCGGACAT  | TATTCTGGCC | ACCGGTGGTC  | CGTCTATGGT | TAAGGCAGCG  |
| 601  | TACTCCAGCG  | GTAAAGAAAGC | TATCGGCGTT | GGTGCGGGCA  | ATACGCCGGC | TATCATCGAT  |
| 661  | GAAAGCGCGG  | ATATTGATAT  | GGCAGTTAGC | TCCATCATTC  | TGTCCAAAAC | CTACGACAAT  |
| 721  | GGTGTATCT   | GTGCAAGCGA  | GCAAAGCATC | CTGGTGATGA  | ATAGCATTTA | CGAGAAGGTC  |
| 781  | AAAAAAGAGT  | TTGTTAAGCG  | TGGTTCCTAT | ATTCTGAACC  | AGAACGCGAT | TGCAAAAATC  |
| 841  | AAAGAAACGA  | TGTTAAGAA   | TGGCGCGATT | AATGCAGATA  | TGTTGGTAA  | GTCCGCATAC  |
| 901  | ATTATCGCGA  | AGATGGCGGG  | TATCGAAGTG | CCGCAAACCA  | CCAAAATCTT | GATCGGCGAA  |
| 961  | GTGCAGAGCG  | TGGAGAAGAG  | CGAACTGTTC | AGCCATGAGC  | TGCTGAGCCC | GGTTCCTGGCT |
| 1021 | ATGTACAAAG  | TGAAGGACTT  | TGACGAAGCC | CTGAAGAAAG  | CTCAGCGTCT | GATTGAGCTG  |
| 1081 | GGCGGCAGCG  | GTCACACGAG  | CAGCCTGTAT | ATCGATAGCC  | AAAACAATAA | GGACAAGGTG  |
| 1141 | AAAGAGTTTCG | GTCTGGCGAT  | GAAAACCTCT | CGCACGTTTA  | TCAACATGCC | GAGCAGCCAA  |
| 1201 | GGTGCAGCG   | GCGATCTGTA  | TAACCTCGCA | ATCGCGCCTT  | CTTTTACGCT | GGGTTGCGGT  |
| 1261 | ACCTGGGGCG  | GTAATTCGGT  | GAGCCAGAAT | GTCGAGCCGA  | AGCACCTGCT | GAACATCAAA  |
| 1321 | TCGGTCGCGG  | AGCGCCGTGA  | GAAGAGACCG | TGGTTCAAAG  | TCCCACAGAA | AATTTACTTC  |
| 1381 | AAATACGGTT  | GCCTGCGTTT  | CGCGCTGAAA | GAAGTAAAG   | ACATGAACAA | AAAGCGTGCG  |
| 1441 | TTCAATTGTTA | CCGACAAGA   | CCTGTTCAAA | CTGGGTTACG  | TGAACAAAAT | CACCAAAGTT  |
| 1501 | TTGGATGAAA  | TTGACATCAA  | GTACTCCATC | TTCACGTATA  | TCAAATCCGA | CCCAACGATT  |
| 1561 | GATAGCGTGA  | AAAAGGGCGC  | TAAAGAAATG | CTGAACTTTG  | AACCGGACAC | CATCATCAGC  |
| 1621 | ATCGGTGGTG  | GCTCTCCTAT  | GGATGCTGCG | AAGGTCATGC  | ACCTGCTGTA | CGAATACCCG  |
| 1681 | GAAGCGGAAA  | TCGAAAACCT  | GGTATCAAC  | TTCATGGACA  | TCCGCAAACG | TATCTGCAAC  |
| 1741 | TTCCCGAAGC  | TGGGCACTAA  | AGCTATTTCC | GTTGCCATCC  | CGACTACCGC | GGGCACTGGT  |
| 1801 | TCCGAAGCCA  | CGCCGTTCCG  | CGTGATCACC | AACGATGAAA  | CCGGTATGAA | ATACCCCGTG  |
| 1861 | ACCTCTTACG  | AACTGACCCC  | GAACATGGCA | ATTATCGACA  | CCGAGTGAT  | GCTGAACATG  |
| 1921 | CCGCGCAAGC  | TGACCGCTGC  | TACCGGCATC | GACGCTCTGG  | TACATGCTAT | TGAGGCGTAC  |
| 1981 | GTTTCCGTGA  | TGGTACCAGA  | TTACACCGAC | GAAGTGGCCC  | TGCGTGCGAT | CAAAATGATT  |
| 2041 | TTCAAGTACC  | TGCCTCGCGC  | TTACAAAAAC | GGCACGAATG  | ACATCGAGGC | GCGTGAGAAA  |
| 2101 | ATGGCCATG   | CAAGCAACAT  | CGCGGGCATG | GCCTTCGCCA  | ACGCGTTCCT | GGGCGTGTGC  |
| 2161 | CACTCTATGG  | CTCACAAACT  | GGGTGCTATG | CACCACGTGC  | CGCACGGTAT | CGCGTGTGCT  |
| 2221 | GTCCCTGATCG | AAGAAGTAAT  | TAAGTACAAC | GCTACTGATT  | GCCCCACTAA | ACAGACCCGC  |
| 2281 | TTCCACAGT   | ACAAATCTCC  | TAACGCTAAA | CGTAAGTACG  | CTGAGATCGC | CGAATACCTG  |
| 2341 | AACCTGAAGG  | GTACGAGCGA  | CACTGAGAAA | GTTACTGCGC  | TGATCGAAGC | TATCTCTAAA  |
| 2401 | CTGAAAATTG  | ACCTGTCCAT  | CCCGCAGAAC | ATCAGCGCCG  | CAGGCATCAA | CAAAAAGGAC  |
| 2461 | TTTTACAACA  | CGCTGGACAA  | AATGAGCGAA | CTGGCTTTTG  | ACGACCAGTG | CACCACTGCA  |
| 2521 | AACCCGCGTT  | ACCCGCTGAT  | CTCTGAGCTG | AAAGACATTT  | ATATCAAATC | TTTTTAA     |

**AdhE2.68 (76997)**

|     |             |            |            |             |            |             |
|-----|-------------|------------|------------|-------------|------------|-------------|
| 1   | ATGAAAGTGA  | CGAACCAAAA | AGAACTGAAA | CAAAAACCTGA | ATGAACTGCG | TGAGGCCCCAG |
| 61  | AAAAAGTTTCG | CTACGTATAC | CCAGGAGCAA | GTTGACAAGA  | TCTTCAAACA | GTGTGCCATT  |
| 121 | GCGGCTGCCA  | AAGAGCGTAT | TAACCTGGCC | AAACTGGCGG  | TGGAAGAAAC | CGGCATCGGT  |
| 181 | CTGGTCGAGG  | ACAAGATTAT | CAAGAATCAC | TTTGCCGCGG  | AGTATATCTA | CAACAAATAC  |
| 241 | AAAAACGAAA  | AGACTTGCGG | CATCATTGAT | CATGATGACA  | GCTTGGGTAT | CACGAAAGTC  |
| 301 | GCAGAACCAA  | TCGGTATTGT | CGCGGCAATT | GTCCCGACCA  | CTAATCCGAC | CAGCACCCGG  |
| 361 | ATCTTCAAGA  | GCTTGATCAG | CCTGAAAACC | CGCAACGCGA  | TTTTCTTCAG | CCCGCACCCG  |

421 CGTGCGAAGA AGAGCACCAT CGCAGCGGCG AAGCTGATTT TGGATGCCGC GGTAAAGGCC  
 481 GGTGCACCGA AAAACATTAT TGGCTGGATT GACGAGCCGA GCATTGAGCT GTCTCAGGAC  
 541 CTGATGAAAG AAGCGGACAT TATTCTGGCC ACCGGTGGTC CGTCTATGGT TAAGGCAGCG  
 601 TACTCCAGCG GTAAGCCTGC TATCGGCGTT GGTGCGGGCA ATACGCCGGC TATCATCGAT  
 661 GAAAGCGCGG ATATTGATAT GGCAGTTAGC TCCATCATTC TGTCCAAAAC CTACGACAAT  
 721 GGTGTTATCT GTGCAAGCGA GCAAAGCATC CTGGTGATGA ATAGCATTTA CGAGAAGGTC  
 781 AAAGAAGAGT TTGTTAAGCG TGGTTCCTAT ATTCTGAACC AGAACGAGAT TGCAAAAATC  
 841 AAAGAAACGA TGTTAAGAA TGGCGCGATT AATGCAGATA TTGTTGGTAA GTCCGCATAC  
 901 ATTATCGCGA AGATGGCGGG TATCGAAGTG CCGCAAACCA CAAAATCTT GATCGGCGAA  
 961 GTGCAGAGCG TGGAGAAGAG CGAACTGTTT AGCGAGGAGA AACTGAGCCC GGTTCCTGGC  
 1021 ATGTACAAAG TGAAGACTT TGACGAAGCC CTGAAGAAAG CTCAGCGTCT GATTGAGCTG  
 1081 GGCGGCAGCG GTACACAGAG CAGCCTGTAT ATCGATAGCC AAAACAATAA GGACAAGGTG  
 1141 AAAGAGTTCG GTCTGGGAT GAAAACCTCT CGCACGTTTA TCAACATGCC GAGCAGCCAA  
 1201 GGTGCGAGCG GCGATCTGTA TAACTTCGCA ATCGCGCCTT CTTTTACGCT GGGTTGCGGT  
 1261 ACCTGGGAGG GTAATTCGGT GAGCCAGAAT GTCGAGCCGA AGCACCTGCT GAACATCAAA  
 1321 TCGGTCCGCG AGCGCCGTGA GAAGAGACCG TGGTTCAAAG TCCCACAGAA AATTTACTTC  
 1381 AAATACGGCT GCCTGCGTTT CGCGTGAAA GAACTGAAAG ACATGAACAA AAAGCGTGCG  
 1441 TTCATTGTTA CCGACAAAGA CCTGTTCAA CTGGTTACG TGAACAAAAT CACCAAAGTT  
 1501 CTGGATGAAA TTGACATCAA GTACTCCATC TTCACTGATA TCAAATCCGA CCCAACGATT  
 1561 GATAGCGTGA AAAAGGGCGC TAAAGAAATG CTGAACTTTG AACCGGACAC CATCATCAGC  
 1621 ATCGGTGGTG GCTCTCCTAT GGATGCTGCG AAGGTCATGC ACCTGCTGTA CGAATACCCG  
 1681 GAAGCGGAAA TCGAAAACCT GGCTATCAAC TTCATGGACA TCCGCAAACG TATCTGCAAC  
 1741 TTCCCGAAGC TGGGCACTAA AGCTATTTCC GTTGCCATCC CGACTACCGC GGGCACTGGT  
 1801 TCCGAAGCCA CGCCGTTCCG CGTGATCACC AACGATGAAA CCGGTATGAA ATACCCGCTG  
 1861 ACCTCTTACG AACTGACCCC GAACATGGCA ATTATCGACA CCGAGCTGAT GCTGAACATG  
 1921 CGCGCAAGC TGACCGCTGC TACCGGCATC GACGCTCTGG TACATGCTAT TGAGGCGTAC  
 1981 GTTCCCGTGA TGGCTACCGA TTACACCGAC GAACTGGCCC TCGGTGCGAT CAAAATGATT  
 2041 TTCAAGTACC TGCTCGCGC TTACAAAAAC GGACGAATG ACATCGAGGC GCGTGAGAAA  
 2101 ATGGCCCATG CAAGCAACAT CGCGGGCATG GCCTTCGCCA ACGCGTTTCT GGGCGTGTGC  
 2161 CACTCTATGC CTCACAAACT GGGTGCTATG CACCACGTGC CGCACGGTAT CGCGTGTGCT  
 2221 TCCTGATCG ACAAGTAAT TAAGTACAAC GCTACTGATT GCCCGACTAA ACAGACCCGC  
 2281 TTCCACAGT ACAATCTCC TAACGTAAA CGTAAGTACG CTGAGATCGC CGAATACCTG  
 2341 AACCTGAAGG GTACGAGCGA CACTGAGAAA GTTACTGCGC TGATCGAAGC TATCTCTAAA  
 2401 CTGAAAATTG ACCTGTCCAT CCCGAGAAC ATCAGCGCCG CAGGCATCAA CAAAAGGAC  
 2461 TTTTACAACA CGCTGGACAA AATGAGCGAA CTGGCTTTTG ACGACCAGTG CACCACTGCA  
 2521 AACCCGCGTT ACCCGCTGAT CTCTGAGCTG AAAGACATTT ATATCAAATC TTTTTAA

**AdhE2.69 (76998)**

1 ATGAAAGTGA CGAACCAAAA AGAACTGAAA CAAAACTGA ATGAACTGCG TGAGGCCAG  
 61 AAAAAGTTCG CTACGTATAC CCAGGACCAA GTTGACAAGA TCTTCAAACA GTGTGCCATT  
 121 GCGGCTGCCA AAGAGCGTAT TAACTTGGCC AAAGTGGCGG TGAAGAAAC CGGCATCGGT  
 181 CTGGTCGAGG ACAAGATTAT CAAGAATCAC TTTGCCGCGG AGTATATCTA CAACAAATAC  
 241 AAAAAACGAAA AGACTTGCAG CATCATGATG CATGATGACA GCTTGGGTAT CACGAAAATC  
 301 GCAGAACCAA TCGGTATTGT CGCGGCAATT GTCCCGACCA CTAATCCGAC CAGCACCGCG  
 361 ATCTTCAAGA GCTTGATCAG CCTGAAAACC CGCAACGCGA TTTTCTTCAG CCCGCACCCG  
 421 CGTGCGAAGA AGAGCACCAT CGCAGCGGCG AAGCTGATTT TGGATGCCGC GGTAAAGGCC  
 481 GGTGCACCGA AAAACATTAT TGGCTGGATT GACGAGCCGA GCATTGAGCT GTCTCAGGAC  
 541 CTGATGAGCG AAGCGGACAT TATTCTGGCC ACCGGTGGTC CGTCTATGGT TAAGGCAGCG  
 601 TACTCCAGCG GTAAGCCTGC TATCGGCGTT GGTGCGGGCA ATACGCCGGC TATCATCGAT  
 661 GAAAGCGCGG ATATTGATAT GGCAGTTAGC TCCATCATTC TGTCCAAAAC CTACGACAAT  
 721 GGTGTTATCT GTGCAAGCGA GCAAAGCATC CTGGTGATGA ATAGCATTTA CGAGAAGGTC  
 781 AAAGAAGAGT TTGTTAAGCG TGGTTCCTAT ATTCTGAACC AGAACGAGAT TGCAAAAATC  
 841 AAAGAAACGA TGTTAAGAA TGGCGCGATT AATGCAGATA TTGTTGGTAA GTCCGCATAC  
 901 ATTATCGCGA AGATGGCGGG TATCGAAGTG CCGCAAACCA CAAAATCTT GATCGGCGAA  
 961 GTGCAGCAG TGGAGAAGAG CGAACTGTTT AGCCATGAGA AACTGAGCCC GGTTCCTGGC  
 1021 ATGTACAAAG TGAAGACTT TGACGAAGCC CTGGACAAGG CTCAGCGTCT GATTGAGCTG  
 1081 GGCGGCAGCG GTACACAGAG CAGCCTGTAT AGCGATAGCC AAAACAATAA GGACAAGGTG  
 1141 AAAGAGTTCG GTCTGGGAT GAAAACCTCT CGCACGTTTA TCAACATGCC GAGCAGCCAA  
 1201 GGTGCGAGCG GCGATCTGTA TAACTTCGCA ATCGCGCCTT CTTTTACGCT GGGTTGCGGT  
 1261 ACCTGGGGCG GTAATTCGGT GAGCCAGAAT GTCGAGCCGA AGCACCTGCT GAACATCAAA  
 1321 TCGGTCCGCG AGCGCCGTGA GAAGAGACCG TGGTTCAAAG TCCCACAGAA AATTTACTTC  
 1381 AAATACGGCT GCCTGCGTTT CGCGTGAAA GAACTGAAAG ACATGAACAA AAAGCGTGCG

|      |             |            |            |            |             |            |
|------|-------------|------------|------------|------------|-------------|------------|
| 1441 | TTCATGTGTTA | CCGACAAAGA | CCTGTTCAAA | CTGGGTTACG | TGAACAAAAT  | CACCAAAGTT |
| 1501 | CTGGATGAAA  | TTGACATCAA | GTACTCCATC | TTCACTGATA | TCAAATCCGA  | CCCAACGATT |
| 1561 | GATAGCGTGA  | AAAAGGGCGC | TAAAGAAATG | CTGAACTTTG | AACCGGACAC  | CATCATCAGC |
| 1621 | ATCGGTGGTG  | GCTCTCCTAT | GGATGCTGCG | AAGGTGATGC | ACCTGCTGTA  | CGAATACCCG |
| 1681 | GAAGCGGAAA  | TCGAAAACCT | GGCTATCAAC | TTCATGGACA | TCCGCAAACG  | TATCTGCAAC |
| 1741 | TTCCCGAAGC  | TGGGCACTAA | AGCTATTTCC | GTTGCCATCC | CGACTACCGC  | GGGCACTGGT |
| 1801 | TCCGAAGCCA  | CGCCGTTGCG | CGTGATCACC | AACGATGAAA | CCGGTATGAA  | ATACCCGCTG |
| 1861 | ACCTCTTACG  | AACTGACCCC | GAACATGGCA | ATTATCGACA | CCGAGCTGAT  | GCTGAACATG |
| 1921 | CCGCGCAAGC  | TGACCGCTGC | TACCGGCATC | GACGCTCTGG | TACATGCTAT  | TGAGGCGTAC |
| 1981 | TTTTCCCGTA  | TGGTACCGA  | TTACACCGAC | GAAGTGGCCC | TGCGTGCGAT  | CAAAATGATT |
| 2041 | TTCAAGTACC  | TGCCCTGCGC | TTACAAAAAC | GGCACGAATG | ACATCGAGGC  | GGGTGAGAAA |
| 2101 | ATGGCCCATG  | CAAGCAACAT | CGCGGGCATG | GCCTTCGCCA | ACGCGTTCCCT | GGGCGTGTGC |
| 2161 | CACTCTATGG  | CTCACAAACT | GGGTGCTATG | CACCACGTGC | CGCACGGTAT  | CGCGTGTGCT |
| 2221 | GTCCTGATCG  | AAGAAGTAAT | TAAGTACAAC | GCTACTGATT | GCCCRACTAA  | ACAGACCGCC |
| 2281 | TTCCACAGT   | ACAAATCTCC | TAACGCTAAA | CGTAAGTACG | CTGAGATCGC  | CGAATACCTG |
| 2341 | AACCTGAAGG  | GTACGAGCGA | CACTGAGAAA | GTTACTGCGC | TGATCGAAGC  | TATCTCTAAA |
| 2401 | CTGAAAATTG  | ACCTGTCCAT | CCCGCAGAAC | ATCAGCGCCC | CAGGCATCAA  | CAAAAAGGAC |
| 2461 | TTTTACAACA  | CGCTGGACAA | AATGAGCGAA | CTGGCTTTTG | ACGACCAGTG  | CACCATCGCA |
| 2521 | AACCCGCGTT  | ACCCGCTGAT | CTCTGAGCTG | AAAGACATTT | ATATCAAATC  | TTTTTTAA   |

**AdhE2.70 (76999)**

|      |             |            |             |            |             |             |
|------|-------------|------------|-------------|------------|-------------|-------------|
| 1    | ATGAAAGTGA  | CGAACCAAAA | AGAAGTAAAA  | CAAAAAGTGA | ATGAAAGTGC  | TGAGGCCCGAG |
| 61   | AAAAAGTTCC  | TGACGTATAC | CCAGGAGCAA  | GTTGACAAGA | TCTTCAAACA  | GTGTGCCATT  |
| 121  | GCGGCTGCCA  | AAGAGCGTAT | TAAGTTGGCC  | AAAGTGGCGG | TGGAAGAAAC  | CGGCATCGGT  |
| 181  | CTGGTCGAGG  | ACAAGATTAT | CAAGAATCAC  | TTTGCCGCGG | AGTATATCTA  | CAACAAATAC  |
| 241  | AAAAACGAAA  | AGACTTGCGG | CATCATTGAT  | CATGATGACA | GCTTGGGTAT  | CACGAAAGTC  |
| 301  | GCAGAACCAA  | TCGGTATTGT | CGCGGCAATT  | GTCCCGACCA | CTAATCCGAC  | CAGCACCCGG  |
| 361  | ATCTTCAAGA  | GCTTGATCAG | CCTGGCGACC  | CGCAACGCGA | TTTTCTTCAG  | CCCGCACCCG  |
| 421  | CGTGCAGAGA  | AGAGCACCAT | CGCAGCGCGC  | AAGCTGATTT | TGGATGCCGC  | GGTTAAGGCC  |
| 481  | GGTGCACCGA  | AAAACATTAT | TGGCTGGATT  | GACGAGCCGA | GCATTGAGCT  | GTCTCAGGAC  |
| 541  | CTGATGAGCG  | AAGCGGACAT | TATTCTGGCC  | ACCGGTGGTC | CGTCTATGGT  | TAAGGCAGCG  |
| 601  | TACTCCAGCG  | GTAAGCCTGC | TATCGGCGTT  | GGTGCGGGCA | ATACGCCGGC  | TATCATCGAT  |
| 661  | GAAAGCGCGG  | ATATTGATAT | GGCAGTTAGC  | TCCATCATTC | TGGGTAAAAC  | CTACGACAAT  |
| 721  | GGTGTATCT   | GTGCAAGCGA | GCAAAGCATC  | CTGGTGATGA | ATAGCATTTA  | CGAGAAGGTC  |
| 781  | AAAGAAGAGT  | TTGTTAAGCG | TGGTTCCATC  | ATTCTGAACC | AGAACGAGAT  | TGCAAAAATC  |
| 841  | AAAGAAACGA  | TGTTTAAGAA | TGGCGCGATT  | AATGCAGATA | TTGTTGGTAA  | GTCCGCATAC  |
| 901  | ATTATCGCGA  | AGATGGCGGG | TATCGAAGTG  | CCGCAAACCA | CCAAAATCTT  | GATCGGCGAA  |
| 961  | GTGCAGAGCG  | TGGAGAAGAG | CGAACTGTTT  | AGCCATGAGA | AACTGAGCCC  | GGTCTCTGGT  |
| 1021 | ATGTACAAAG  | TGAAGGACTT | TGACGAAGCC  | CTGAAGAAAG | CTCAGCGTCT  | GATTGAGCTG  |
| 1081 | GGCGGACGCG  | GTACACGAGG | CAGCCTGTAT  | ATCGATAGCC | AAAACAATAA  | GGACAAGGTC  |
| 1141 | AAAGAGTTCC  | GTCTGGCGAT | AAAAACCTCT  | CGCACGTTTA | TCAACATGCC  | GAGCAGCCAA  |
| 1201 | GGTGCAGCGC  | GCGATCTGTA | TAAGTTCTGCA | ATCGGCGCTT | CTTTTACGCT  | GGCGTGGCGT  |
| 1261 | ACCTGGGGCG  | GTAATTCGGT | GAGCCAGAAT  | GTCGAGCCGA | AGCACCTGCT  | GAACATCAAA  |
| 1321 | TCGGTCCGCG  | AGCGCCGTGA | GAAGAGACCG  | TGGTTCAAAG | TCCCACAGAA  | AATTTACTTC  |
| 1381 | AAATACGGCT  | GCCTGCGTTT | CGCGCTGAAA  | GAAGTGAAG  | ACATGAACAA  | AAAGCGTGGC  |
| 1441 | TTCATGTGTTA | CCGACAAAGA | CCTGTTCAAA  | CTGGGTTACG | TGAACAAAAT  | CACCAAAGTT  |
| 1501 | CTGGATGAAA  | TTGACATCAA | GTACTCCATC  | TTCACTGATA | TCAAATCCGA  | CCCAACGATT  |
| 1561 | GATAGCGTGA  | AAAAGGGCGC | TAAAGAAATG  | CTGAACTTTG | AACCGGACAC  | CATCATCAGC  |
| 1621 | ATCGGTGGTG  | GCTCTCCTAT | GGATGCTGCG  | AAGGTGATGC | ACCTGCTGTA  | CGAATACCCG  |
| 1681 | GAAGCGGAAA  | TCGAAAACCT | GGCTATCAAC  | TTCATGGACA | TCCGCAAACG  | TATCTGCAAC  |
| 1741 | TTCCCGAAGC  | TGGGCACTAA | AGCTATTTCC  | GTTGCCATCC | CGACTACCGC  | GGGCACTGGT  |
| 1801 | TCCGAAGCCA  | CGCCGTTGCG | CGTGATCACC  | AACGATGAAA | CCGGTATGAA  | ATACCCGCTG  |
| 1861 | ACCTCTTACG  | AACTGACCCC | GAACATGGCA  | ATTATCGACA | CCGAGCTGAT  | GCTGAACATG  |
| 1921 | CCGCGCAAGC  | TGACCGCTGC | TACCGGCATC  | GACGCTCTGG | TACATGCTAT  | TGAGGCGTAC  |
| 1981 | TTTTCCCGTA  | TGGTACCGA  | TTACACCGAC  | GAAGTGGCCC | TGCGTGCGAT  | CAAAATGATT  |
| 2041 | TTCAAGTACC  | TGCCCTGCGC | TTACAAAAAC  | GGCACGAATG | ACATCGAGGC  | GCGTGAGAAA  |
| 2101 | ATGGCCCATG  | CAAGCAACAT | CGCGGGCATG  | GCCTTCGCCA | ACGCGTTCCCT | GGGCGTGTGC  |
| 2161 | CACTCTATGG  | CTCACAAACT | GGGTGCTATG  | CACCACGTGC | CGCACGGTAT  | CGCGTGTGCT  |
| 2221 | GTCCTGATCG  | AAGAAGTAAT | TAAGTACAAC  | GCTACTGATT | GCCCRACTAA  | ACAGACCGCC  |
| 2281 | TTCCACAGT   | ACAAATCTCC | TAACGCTAAA  | CGTAAGTACG | CTGAGATCGC  | CGAATACCTG  |
| 2341 | AACCTGAAGG  | GTACGAGCGA | CACTGAGAAA  | GTTACTGCGC | TGATCGAAGC  | TATCTCTAAA  |
| 2401 | CTGAAAATTG  | ACCTGTCCAT | CCCGCAGAAC  | ATCAGCGCCC | CAGGCATCAA  | CAAAAAGGAC  |

2461 TTTTACAACA CGCTGGACAA AATGAGCGAA CTGGCTTTTG ACGACCAGTG CACCACTGCA  
 2521 AACCCGCGTT ACCCGCTGAT CTCTGAGCTG AAAGACATTT ATATCAAATC TTTTAA

**AdhE2.71 (77000)**

1 ATGAAAGTGA CGAACCAAAA AGAACTGAAA CAAAACTGA ATGAACTGCG TGAGGCCAG  
 61 AAAAAGTTCG CTACGTATAC CCAGGAGCAA GTTGACAAGA TCTTCAAACA GTGTGCCATT  
 121 GCGGCTGCCA AAGAGCGTAT TAACTTGGCC AAAGTGGCGG TGAAGAAAAC CGGCATCGGT  
 181 CTGGTCGAGG ACAAGATTAT CAAGAATCAC TTTGCCGCGG AGTATATCTA CAACAAATAC  
 241 AAAAACCCACA AGACTTGCAG CATCATTGAT CATGATGACA GCTTGGGTAT CACGAAAGTC  
 301 GCAGAACCAA TCGGTATTGT CGCGGCAATT GTCCCGACCA CTAATCCGAC CAGCACCAGC  
 361 ATCTTCAAGA GCTTGATCAG CCTGAAAACC CGCAACGCGA TTTTCTTCAG CCCGCACCCG  
 421 CGTGCGAAGA AGAGCACCAT CGCAGCGGCG AAGCTGATTT TGGATGCCGC GGTAAAGGCC  
 481 GGTGCACCGA AAAACATTAT TGGCTGGATT GACGAGCCGA GCATTGAGCT GTCTCAGGAC  
 541 CTGATGAGCG AAGCGGACAT TATTCTGGCC ACCGGTGGTC CGTCTATGGT TAAGGCACCG  
 601 TACTCCAGCG GTAAGCCTGC TATCGGCGTT GGTGCGGGCA ATACGCCGCG TATCATCGAT  
 661 GAAAGCGCGG ATATTGATAT GGCAGTTAGC TCCATCATTC TGTCCAAAAC CTACGACAAT  
 721 AACGTTATCT GTGCAAGCGA GCAAAGCATC CTGGTGATGA ATAGCATTTA CGAGAAGGTC  
 781 AAAGAAGAGT TTGTTAAGCG TGGTTCCTAT ATTCTGAACC AGAACGAGAT TGCAAAAATC  
 841 AAAGAAACGA TGTTTAAGAA TGCGCGGATT AATGCAGATA TTGTTGGTAA GTCCGCATAC  
 901 ATTATCGCGA AGATGGCGGG TATCGAAGTG CCGCAAACCA CCAAAATCTT GATCGGCGAA  
 961 GTGCAGAGCG TGGAGAAGAG CGAACTGTTT AGCCATGAGA AACTGAGCCC GGTTCCTGGCT  
 1021 ATGTACAAAAG TGAAGGACTT TGACGAAGCC CTGAAGAAAG CTCAGCGTCT GATTGAGCTG  
 1081 GGCGCAGCG GTACACAGAG CAGCCTGTAT ATCGATAGCC AAAACAATAA GGACAAGGTG  
 1141 AAAGAGTTCG GTCTGGCGAT GAAAACCTCT CGCTTCTTTA TCAACATGCC GAGCAGCCAA  
 1201 GGTGCGAGCG GCGATCTGTA TAACTTCGCA ATCGCGCCTT CTTTTACGCT GGGTTGCCCG  
 1261 ACCTGGGGCG GTAATTTCGGT GAGCCAGAAT GTCGAGCCGA AGCACCTGCT GAACATCAAA  
 1321 TCGGTTCGCGG AGCGCCGTGA GAAGAGACCG TGGTTCAAAG TCCCACAGAA AATTTACTTC  
 1381 AAATACGGCT GCCTGCGTTT CGCGTGAAA GAACTGAAAG ACATGAACAA AAAGCGTGCG  
 1441 TTCATTGTTA CCGACAAAAGA CCTGTTCAAA CTGGGTTACG TGAACAAAAT CACCAAAGTT  
 1501 CTGGATGAAA TTGACATCAA GTACTCCATC TTCACTGATA TCAAATCCGA CCCAACGATT  
 1561 GATAGCGTGA AAAAGGGCGC TAAAGAAATG CTGAACTTTG AACCGGACAC CATCATCAGC  
 1621 ATCGTGGTG GCTCTCCTAT GGATGCTGCG AAGGTCATGC ACCTGCTGTA CGAATACCCG  
 1681 GAAGCGGAAA TCGAAAACCT GGCTATCAAC TTCATGGACA TCCGCAAACG TATCTGCAAC  
 1741 TTCCCGAAGC TGGGCACTAA AGCTATTTCC GTTGCCATCC CGACTACCGC GGGCATTGGT  
 1801 TCCGAAGCCA CGCGTTCGC CGTGATCAC AACGATGAAA CCGGTATGAA ATACCCTGTG  
 1861 ACCTCTTACG AACTGACCCC GAACATGGCA ATTATCGACA CCGAGCTGAT GCTGAACATG  
 1921 CCGCGCAAGC TGACCGCTGC TACCGGCATC GACGCTCTGG TACATGCTAT TGAGGCGTAC  
 1981 GTTCCCGTGA TGGCTACCGA TTACACCGAC GAACTGGCCC TCGGTGCGAT CAAAATGATT  
 2041 TTCAAGTACC TGCTCGCGC TTACAAAAAC GGACAGAATG ACATCGAGGC GCGTGAGAAA  
 2101 ATGGCCCATG CAAGCAACAT CGCGGGCATG GCCTTCGCCA ACGCGTTCCT GGGCGTGTGC  
 2161 CACTCTATGG CTCACAAACT GGGTGCTATG CACCACGTGC CGCACGGTAT CGCGTGTGCT  
 2221 GTCCTGATCG AAGAAGTAAT TAAGTACAAC GCTACTGATT GCCCGACTAA ACAGACTGCC  
 2281 TTCCACAGT ACAAATCTCC TAACGCTAAA CGTAAGTACG CTGAGATCGC CGAATACCTG  
 2341 AACCTGAAGG GTACGAGCGA CACTGAGAAA GTTACTGCGC TGATCGAAGC TATCTCTAAA  
 2401 CTGAAAATTG ACCTGTCCAT CCCGAGAAC ATCAGCGCCG CAGGCATCAA CAAAAGGAC  
 2461 TTTTACAACA CGCTGGACAA AATGAGCGAA CTGGCTTTTG ACGACCAGTG CACCACTGCA  
 2521 AACCCGCGTT ACCCGCTGAT CTCTGAGCTG AAAGACATTT ATATCAAATC TTTTAA

**AdhE2.72 (77001)**

1 ATGAAAGTGA CGAACCAAAA AGAACTGAAA CAAAACTGA ATGAACTGCG TGAGGCCAG  
 61 AAAAAGTTCG CTACGTATAC CCAGGAGCAA GTTGACAAGA TCTTCAAACA GTGTGCCATT  
 121 GCGGCTGCCA AAGAGCGTAT TAACTTGGCC AAAGTGGCGG TGAAGAAAAC CGGCATCGGT  
 181 CTGGTCGAGG ACAAGATTAT CAAGAATCAC TTTGCCGCGG AGTATATCTA CAACAAATAC  
 241 AAAAACCCACA AGACTTGCAG CATCATTGAT CATGATGACA GCTTGGGTAT CACGAAAGTC  
 301 GCAGAACCAA TCGGTATTGT CGCGGCAATT GTCCCGACCA CTAATCCGAC CAGCACCAGC  
 361 ATCTTCAAGA GCTTGATCAG CCTGAAAACC CGCAACGCGA TTTTCTTCAG CCCGCACCCG  
 421 CGTGCGAAGA AGAGCACCAT CGCAGCGGCG AAGCTGATTT TGGATGCCGC GGTAAAGGCC  
 481 GGTGCACCGA AAAACATTAT TGGCTGGATT GACGAGCCGA GCATTGAGCT GTCTCAGGAC  
 541 CTGATGAGCG AACCGGACAT TATTCTGGCC ACCGGTGGTC CGTCTATGGT TAAGGCACCG  
 601 TACTCCAGCG GTAAGCCTGC TATCGGCGCG TATCGGCGCA ATACGCCGCG TATCATCGAT  
 661 GAAAGCGCGG ATATTGATAT GGCAGTTAGC TCCATCATTC TGTCCAAAAC CTACGACAAT  
 721 GGTGTTATCT GTGCAAGCGA GCAAAGCATC CTGGTGATGA ATAGCATTTA CGAGAAGGTC

781 AAAGAAGAGT TTGTTAAGCG TGGTTCCTAT ATTCTGAACC AGGAGGAGAT TGCAAAAATC  
841 AAAGAAACGA TGTTTAAGAA TGCGCGGATT AATGCAGATA TTGTTGGTAA GTCCGCATAC  
901 ATTATCGCGA AGATGGCGGG TATCGAAGTG CCGCAAACCA CCAAAATCTT GATCGGCGAA  
961 GTGCAGAGCG TGGAGAAGAG CGAACTGTTC AGCCATGAGA AACTGAGCCC GGTTCCTGGCT  
1021 ATGTACAAAG TGAAGGACTT TGACGAAGCC CTGAAGAAAG CTCAGCGTCT GATTGAGCTG  
1081 GGCGGCAGCG GTCACACGAG CAGCCTGTAT AGCGATAGCC AAAACAATAA GGACAAGGTG  
1141 AAAGAGTTCG GTCTGGCGAT GAAAACCTCT CGCACGTTTA TCAACATGCC GAGCAGCCAA  
1201 GGTGCGAGCG GCGATCTGTA TAACTTCGCA ATCGCGCCTT CTTTTACGCT GGGTTGCGGT  
1261 ACCTGGGGCG GTAATTCGGT GAGCCAGAAT GTCGAGCCGA AGCACCTGCT GAACATCAAA  
1321 TCGGTTCGCG AGCGCCGTGA GAAGAGACCA TGGTTCAAAG TCCCACAGAA AATTTACTTC  
1381 AAATACGGCT GCCGTGCTTT CGCGTGAAA GAACTGAAAG ACATGAACAA AAAGCGTGGC  
1441 TTCATTGTTA CCGACAAAGA CCTGTTCAAA CTGGGTTACG TGAACAAAAT CACCAAAGTT  
1501 CTGGATGAAA TTGACATCAA GTACTCCATC TTCACTGATA TCAAATCCGA CCCAACGATT  
1561 GATAGCGTGA AAAAGGGCGC TAAAGAAATG CTGAACTTTG AACCGGACAC CATCATCAGC  
1621 ATCGGTGGTG GCTCTCCTAT GGATGCTGCG AAGGTCATGC ACCTGCTGTA CGAATACCCG  
1681 GAAGCGGAAA TCGAAAACCT GGCTATCAAC TTCATGGACA TCCGCAAACG TATCTGCAAC  
1741 TTCCCGAAGC TGGGCACTAA AGCTATTTCC GTTGCCATCC CGACTACCGC GGGCACTGGT  
1801 TCCGAAGCCA CGCGTTCGC CGTGATCACC AACGATGAAA CCGGTATGAA ATACCCGCTG  
1861 ACCTCTTACG AACTGACCCC GAACATGGCA ATTATCGACA CCGAGCTGAT GCTGAACATG  
1921 CCGCGCAAGC TGACCGCTGC TACCGGCATC GACGCTCTGG TACATGCTAT TGAGGCGTAC  
1981 GTTTCGCTGA TGGTACCGA TTACACCGAC GAACTGGCCC TCGGTGCGAT CAAAATGATT  
2041 TTCAAGTACC TGCTCGCGC TTACAAAAAC GGCACGAATG ACATCGAGGC GCGTGAGAAA  
2101 ATGGCCCATG CAAGCAACAT CGCGGGCATG GCCTTCGCCA ACGCGTTCCT GGGCGTGTGC  
2161 CACTCTATGG CTCACAAACT GGGTGCTATG CACCACGTGC CGCACGGTAT CGCGTGTGCT  
2221 GTCCTGATCG AAGAAGTAAT TAAGTACAAC GCTACTGATT GCCCGACTAA ACAGACCGCC  
2281 TTCCACAGT ACAAATCTCC TAACGCTAAA CGTAAGTACG CTGAGATCGC CGAATACCTG  
2341 AACCTGAAGG GTACGAGCGA CACTGAGAAA GTTACTGCGC TGATCGAAGC TATCTCTAAA  
2401 CTGAAAATTG ACCTGTCCAT CCGCAGAAC ATCAGCGCCG CAGGCATCAA CAAAAGGAC  
2461 TTTTACAACA CGCTGGACAA AATGAGCGAA CTGGCTTTTG ACGACCAGTG CACCCTGCA  
2521 AACCCGCGTT ACCCGCTGAT CTCTGAGCTG AAAGACATTT ATATCAAATC TTTTAA

**AdhE2.73 (77002)**

1 ATGAAAGTGA CGAACCAAAA AGAACTGAAA CAAAAACTGA ATGAACTGCG TGAGGCCCGAG  
61 AAAAAAGTCC CTTGCTATAC CCAGGAGCAA GTTGACAAGA TCTTCAAACA GTGTGCCATT  
121 GCGGCTGCCA AAGAGCGTAT TAACCTGGCC CGTCTGGCGG TGAAGAAAAC CGGCATCGGT  
181 CTGGTFCGAG ACAAGATTAT CAAGAATCAC TTTGCCGCGG AGTATATCTA CAACAAATAC  
241 AAAACCGGTA AGACTTGCGG CATCATTGAT CATGATGACA GCTTGGGTAT CACGAAAGTC  
301 GCAGAACCAA TCGGTATTGT CGCGCAATT GTCCGACCA CTAATCCGAC CAGCACCAGC  
361 ATCTTCAAGA GCTTGATCAG CCTGAAAACC CGCAACGCGA TTTTCTTCAG CCCGCACCCG  
421 CGTGCGAAGA AGAGCACCAT CGCAGCGGCG AAGCTGATTT TGGATGCCGC GGTAAAGGCC  
481 GGTGCACCGA AAAACATTAT TGGCTGGATT GACGAGCCGA GCATTGAGCT GTCTCAGGAC  
541 CTGATGAGCG AAGCGACAT TATCTGGCC ACCGGTGGTC CGTCTATGGT TAAGGCAGCG  
601 TACTCCAGCG GTAAGCCTGC TATCGGCGTT GGTGCGGGCA ATACGCCGGC TATCATCGAT  
661 GAAAGCGCGG ATATTGATAT GGCAGTTAGC TCCATCATTC TGTCCAAAAC CTACGACAAT  
721 GGTGTATATCT GTGCAAGCGA GCAAAGCATC CTGGTGATGA ATAGCATTTA CGAGAAGGTC  
781 AAAGAAGAGT TTGTTAAGCG TGGTTCCTAT ATTCTGAACC AGAACGAGAT TGCAAAAATC  
841 AAAGAAACGA TGTTTAAGAA TGCGCGGATT AATGCAGATA TTGTTGGTAA GTCCGCATAC  
901 ATTATCGCGA AGATGGCGGG TATCGAAGTG CCGCAAACCA CCAAAATCTT GATCGGCGAA  
961 GTGCAGAGCG TGGAGAAGAG CGAACTGTTC AGCCATGAGA AACTGAGCCC GGTTCCTGGCT  
1021 ATGTACAAAG TGAAGGACTT TGACGAAGCC CTGAAGAAAG CTCAGCGTCT GATTGAGCTG  
1081 GGCGGCAGCG GTCACACGAG CAGCCTGTAT ATCGATAGCC AAAACAATAA GGACAAGGTG  
1141 AAAGAGTTCG GTCTGGCGAT GAAAACCTCT CGCACGTTTA TCAACATGCC GAGCAGCCAA  
1201 GGTGCGAGCG GCGATCTGTA TAACTTCGCA ATCGCGCCTT CTTTTACGCT GGGTTGCGGT  
1261 ACCTGGGAGG GTAATTCGGT GAGCCAGAAT GTCGAGCCGA AGCACCTGCT GAACATCAAA  
1321 TCGGTTCGCG AGCGCCGTGA GAAGAGACCG TGGTTCAAAG TCCCACAGAA AATTTACTTC  
1381 AAATACGGCT GCCTGCGTTT CGCGCTGAAA GAACTGAAAG ACATGAACAA AAAGCGTGGC  
1441 TTCATTGTTA CCGACAAAGA CCTGTTCAAA CTGGGTTACG TGAACAAAAT CACCAAAGTT  
1501 CTGGATGAAA TTGACATCAA GTACTCCATC TTCACTGATA TCAAATCCGA CCCAACGATT  
1561 GATAGCGTGA AAAAGGGCGC TAAAGAAATG CTGAACTTTG AACCGGACAC CATCATCAGC  
1621 ATCGGTGGTG GCTCTCCTAT GGATGCTGCG AAGGTCATGC ACCTGCTGTA CGAATACCCG  
1681 GAAGCGGAAA TCGAAAACCT GGCTATCAAC TTCATGGACA TCCGCAAACG TATCTGCAAC  
1741 TTCCCGAAGC TGGGCACTAA AGCTATTTCC GTTGCCATCC CGACTACCGC GGGCACTGGT

|      |             |            |            |            |             |            |
|------|-------------|------------|------------|------------|-------------|------------|
| 1801 | TCCGAAGCCA  | CGCCGTTCGC | CGTGATCACC | AACGATGAAA | CCGGTATGAA  | ATACCCGCTG |
| 1861 | ACCTCTTACG  | AACTGACCCC | GAACATGGCA | ATTATCGACA | CCGAGCTGAT  | GCTGAACATG |
| 1921 | CCGCACAAGC  | TGACCGCTGC | TACCGGCATC | GACGCTCTGG | TACATGCTAT  | TGAGGCGTAC |
| 1981 | TTTTCCGTGA  | TGGCTACCGA | TTACACCGAC | GAACCTGGCC | TGCGTGCGAT  | CAAAATGATT |
| 2041 | TTCAAGTACC  | TGCCTCGCGC | TTACAAAAAC | GGCACGAATG | ACATCGAGGC  | GCGTGAGAAA |
| 2101 | ATGGCCCATG  | CAAGCAACAT | CGCGGGCATG | GCCTTCGCCA | ACGCGTTCCCT | GGGCGTGTGC |
| 2161 | CACTCTATGG  | CTCACAAACT | GGGTGCTATG | CACCACGTGC | CGCACGGTAT  | CGCGTGTGCT |
| 2221 | GTCCTGATCG  | AAGAAGTAAT | TAAGTACAAC | GCTACTGATT | GCCCCACTAA  | ACAGACCGCC |
| 2281 | TTCCCACAGT  | ACAAATCTCC | TAACGCTAAA | CGTAAGTACG | CTGAGATCGC  | CGAATACCTG |
| 2341 | AACCTGAAGG  | GTACGAGCGA | CACTGAGAAA | GTTACTGCGC | TGATCGAAGC  | TATCTCTAAA |
| 2401 | CTGAAAATTG  | ACCTGTCCAT | CCCGCAGAAC | ATCAGCCCGG | CAGGCATCAA  | CAAAAGGAC  |
| 2461 | TTTTTACAACA | CGCTGGACAA | AATGAGCGAA | CTGGCTTTTG | ACGACCAGTG  | CACCACTGCA |
| 2521 | AACCCGCGTT  | ACCCGCTGAT | CTCTGAGCTG | AAAGACATTT | ATATCAAATC  | TTTTTTAA   |

**AdhE2.74 (77003)**

|      |             |             |            |            |             |             |
|------|-------------|-------------|------------|------------|-------------|-------------|
| 1    | ATGAAAGTGA  | CGAACCAAAA  | AGAAGTAAA  | CAAAAAGACA | ATGAACTGCG  | TGAGGCCCG   |
| 61   | AAAAAGTTCG  | CTACGTATAC  | CCAGGAGCAA | GTTGACAAGA | TCTTCAAACA  | GTGTGCCATT  |
| 121  | GCGGCTGCCA  | AAGAGCGTAT  | TAACCTGGCC | CGTCTGGCGG | TGGAAGAAAC  | CGGCATCGGT  |
| 181  | CTGGTCGAGG  | ACAAGATTAT  | CAAGAATCAC | TTTGCCGCGG | AGTATATCTA  | CAACAAATAC  |
| 241  | AAAAACGAAA  | AGACTTGCGG  | CATCATTGAT | CATGATGACA | GCTTGGGTAT  | CACGAAAGTC  |
| 301  | CGAGAACCAA  | TCGGTATTGT  | CGCGGCAATT | GTCCCGACCA | CTAATCCGAC  | CAGCACCCGG  |
| 361  | ATCTTCAAGA  | GCTTGATCAG  | CCTGAAAACC | CGCAACGCGA | TTTTCTTCAG  | CCCGCAACCG  |
| 421  | CGTGCGAAGA  | AGAGCACCAT  | CGCAGCGGCG | AAGCTGATTT | TGGATGCCGC  | GGTTAAGGCC  |
| 481  | GGTGCACCGA  | AAAACATTAT  | TGGCTGGATT | GACGAGCCGA | GCATTGAGCT  | GTCTCAGGAC  |
| 541  | CTGATGAGCG  | AAGCGGACAT  | TATTCTGGCC | ACCGGTGGTC | CGTCTATGGT  | TAAGGCAGCG  |
| 601  | TACTCCAGCG  | GTAAGCCTGC  | TATCGGCGTT | GGTGCGGGCA | ATACGCCGGC  | TATCATCGAT  |
| 661  | GAAAGCGCGG  | ATATTGATAT  | GGCAGTTAGC | TCCATCATTC | TGTCCAAAAC  | CTACGACAAT  |
| 721  | GGTGTATCT   | GTGCAAGCGA  | GCAAAGCATC | CTGGTGATGA | ATAGCATTTA  | CGAGAAGGTC  |
| 781  | AAAGCGGAGT  | TTGTTAAGCG  | TGGTTCCTAT | ATTCTGAACC | AGAACGAGAT  | TGCCAAAAATC |
| 841  | AAAGAAACGA  | TGTTTAAGAA  | TGGCGCGATT | AATGCAGATA | TTGTTGGTAA  | GTCCGCATAC  |
| 901  | ATTATCGCGA  | AGATGGCGGG  | TATCGAAGTG | CCGCAAACCA | CCAAAATCTT  | GATCGGCGAA  |
| 961  | GTGCAGAGCG  | TGGAGAAGAG  | CGAACTGTTC | AGCGAGGAGA | AACTGAGCCC  | GGTTCCTGGCT |
| 1021 | ATGTACAAAG  | TGAAGGACTT  | TGACGAAGCC | CTGAAGAAAG | CTCAGCGTCT  | GATTACACCTG |
| 1081 | GGCGGCAGCG  | GTACACAGAG  | CAGCCTGTAT | ATCGATAGCC | AAAACAATAA  | GGACAAGGTG  |
| 1141 | AAAGAGTTTC  | GTCTGGCGAT  | GAAAACCTCT | CGCAGTTTTA | TCAACATGCC  | GAGCAAGCAA  |
| 1201 | GGTGCAGGCG  | GCGATCTGTA  | TAACCTCGCA | ATCGCGCCTT | CTTTTACGCT  | GGGTTGCGGT  |
| 1261 | ACCTGGGGCG  | GTAATTTCGGT | GAGCCAGAAT | GTCGAGCCGA | AGCACCTGCT  | GAACATCAAA  |
| 1321 | TCGGTCCGGG  | AGCGCCGTGA  | GAAGAGACCG | TGTTCAAAG  | TCCCACAGAA  | AATTTACTTC  |
| 1381 | AAATACGGCT  | GCCTGCGTTT  | CGCGCTGAAA | GAAGTAAAAG | ACATGAACAA  | AAAGCGTGCG  |
| 1441 | TTCAATTGTTA | CCGACAAAAG  | CCTGTTCAAA | CTGGGTTACG | TGAACAAAAT  | CACCAAAGTT  |
| 1501 | CTGGATGAAA  | TTGACATCAA  | GTACTCCATC | TTCATGATA  | TCAAATCCGA  | CCCAACGATT  |
| 1561 | GATAGCGTGA  | AAAAGGGCGC  | TAAAGAAATG | CTGAACTTTG | AACCGGACAC  | CATCATCAGC  |
| 1621 | ATCGGTGGTG  | GCTCTCCTAT  | GGATGCTGCG | AAGGTCATGC | ACCTGCTGTA  | CGAATACCCG  |
| 1681 | GAAGCGGAAA  | TCGAAAACCT  | GGCTATCAAC | TTCATGGACA | TCCGAAAACG  | TATCTGCAAC  |
| 1741 | TTCCCGAAGC  | TGGGCACTAA  | AGCTATTTCC | GTTGCCATCC | CGACTACCGC  | GGGCACTGGT  |
| 1801 | TCCGAAGCCA  | CGCCGTTCGC  | CGTGATCACC | AACGATGAAA | CCGGTATGAA  | ATACCCGCTG  |
| 1861 | ACCTCTTACG  | AACTGACCCC  | GAACATGGCA | ATTATCGACA | CCGAGCTGAT  | GCTGAACATG  |
| 1921 | CCGCACAAGC  | TGACCGCTGC  | TACCGGCATC | GACGCTCTGG | TACATGCTAT  | TGAGGCGTAC  |
| 1981 | TTTTCCGTGA  | TGGCTACCGA  | TTACACCGAC | GAACCTGGCC | TGCGTGCGAT  | CAAAATGATT  |
| 2041 | TTCAAGTACC  | TGCCTCGCGC  | TTACAAAAAC | GGCACGAATG | ACATCGAGGC  | GCGTGAGAAA  |
| 2101 | ATGGCCCATG  | CAAGCAACAT  | CGCGGGCATG | GCCTTCGCCA | ACGCGTTCCCT | GGGCGTGTGC  |
| 2161 | CACTCTATGG  | CTCACAAACT  | GGGTGCTATG | CACCACGTGC | CGCACGGTAT  | CGCGTGTGCT  |
| 2221 | GTCCTGATCG  | AAGAAGTAAT  | TAAGTACAAC | GCTACTGATT | GCCCCACTAA  | ACAGACCGCC  |
| 2281 | TTCCCACAGT  | ACAAATCTCC  | TAACGCTAAA | CGTAAGTACG | CTGAGATCGC  | CGAATACCTG  |
| 2341 | AACCTGAAGG  | GTACGAGCGA  | CACTGAGAAA | GTTACTGCGC | TGATCGAAGC  | TATCTCTAAA  |
| 2401 | CTGAAAATTG  | ACCTGTCCAT  | CCCGCAGAAC | ATCAGCCCGG | CAGGCATCAA  | CAAAAGGAC   |
| 2461 | TTTTTACAACA | CGCTGGACAA  | AATGAGCGAA | CTGGCTTTTG | ACGACCAGTG  | CACCACTGCA  |
| 2521 | AACCCGCGTT  | ACCCGCTGAT  | CTCTGAGCTG | AAAGACATTT | ATATCAAATC  | TTTTTTAA    |

**AdhE2.75 (77004)**

|    |            |            |            |            |            |            |
|----|------------|------------|------------|------------|------------|------------|
| 1  | ATGAAAGTGA | CGAACCAAAA | AGAAGTAAA  | CAAAAAGTGA | ATGAACTGCG | TGAGGCCCG  |
| 61 | AAAAAGTTCG | CTACGTATAC | CCAGGAGCAA | GTTGACAAGA | TCTTCAAACA | GTGTGCCATT |



121 GCGGCTGCCA AAGAGCGTAT TAACTTGGCC AAAGTGGCGG TGAAGAAAC CGGCATCGGT  
181 CTGGTCGAGG ACAAGATTAT CAAGAATCAC TTTGCCGCGG AGTATATCTA CAACAAATAC  
241 AAAAACGAAA AGACTTGCGG CATCATTGAT CATGATGACA GCTTGGGTAT CACGAAAGTC  
301 GCAGAACCAA TCGGTATTGT CGCGGCAATT GTCCCGACCA CTAATCCGAC CAGCACCGCG  
361 ATCTTCAAGA GCTTGATCAG CCTGAAAACC CGCAACGCGA TTTTCTTCAG CCCGCACCCG  
421 CGTGCGAAGA AGAGCACCAT CGCAGCGGCG AAGCTGATTT TGGATGCCCG GGTAAAGGCC  
481 GGTGCACCGA AAAACATTAT TGGCTGGATT GACGAGCCGA GCATTGAGCT GTCTCAGGAC  
541 ATGATGAGCG AAGCGGACAT TATCTGGCC ACCGGTGGTC CGTCTATGGT TAAGGCAGCG  
601 TACTCCAGCG GTAAGCCTGC TATCGGCGTT GGTGCGGGCA ATACGCCGGC TATCATCGAT  
661 GAAAGCGCGG ATATTGATAT GGCAGTTAGC TCCATCATTG TGTCAAAAC CTACGACAAT  
721 GGTGTTATCT GTGCAAGCGA GCAAAGCATC CTGGTGATGA ATAGCATTTA CGAGAGGTC  
781 AAAGAAGAGT TTGTTAAGCG TGGTTCCTAT ATTCTGAACC AGAACGAGAT TGCAAAAATC  
841 AAAGAAACGA TGTTAAGAA TGGCGCGATT AATGCAGATA TTGTTGGTAA GTCCGCATAC  
901 ATTATCGCGA AGATGGCGGG TATCGAAGTG CCGCAAACCA CCAAATCTT GATCGGCGAA  
961 GTGCAGAGCG TGGAGAAGAG CGAACTGTTC AGCGAGGAGA AACTGAGCCC GGTCTGGCT  
1021 ATGTACAAAG TGAAGGACTT TGACGAAGCC CTGGACAAAG CTCAGCGTCT GATTAACCTG  
1081 GGCGGCAGCG GTCACACGAG CAGCCTGTAT ATCGATAGCC AAAACAATAA GGACAAGGTG  
1141 AAAGAGTTCG GTCTGGCGAT GAAAACCTCT CGCACGTTTA TCAACATGCC GAGCAGCCAA  
1201 GGTGCGAGCG GCGATCTGTA TAACTTCGCA ATCGCGCCTT CTTTTACGCT GCGTGCAGG  
1261 ACCTGGGGCG GTAATTCGGT GAGCCAGAAT GTCGAGCCGA AGCACCTGCT GAACATCAAA  
1321 TCGGTCGCGG AGCGCCGTGA GAAGAGACCG TGTTCAAAG TCCCACAGAA AATTTACTTC  
1381 AAATACGGCT GCCTGCGTTT CGCGCTGAAA GAACTGAAAG ACATGAACAA AAAGCGTGCG  
1441 TTCATTGTTA CCGACAAAAG CCTGTTCAA CTGGGTTACG TGAACAAAAT CACCAAAGTT  
1501 CTGGATGAAA TTGACATCAA GTACTCCATC TTCACTGATA TCAAATCCGA CCCAACGATT  
1561 GATAGCGTGA AAAAGGGCGC TAAAGAAATG CTGAACTTTG AACCGACAC CATCATCAGC  
1621 ATCGGTGGTG GCTCTCCTAT GGATGCTGCG AAGGTCATGC ACCTGCTGTA CGAATACCCG  
1681 GAAGCGGAAA TCGAAAACCT GGCTATCAAC TTCATGGACA TCCGAAAACG TATCTGCAAC  
1741 TTCCGGAAGC TGGGCACTAA AGCTATTTCC GTTGCCATCC GACTACCGC GGGCACTGGT  
1801 TCCGAAGCCA CGCCGTTCCG CGTGATCACC AACGATGAAA CCGGTATGAA ATACCCGCTG  
1861 ACCTCTTACG AACTGACCCC GAACATGGCA ATTATCGACA CCGAGCTGAT GCTGAACATG  
1921 CCGCGCAAGC TGACCGCTGC TACCGGCATC GACGCTCTGG TACATGCTAT TGAGAGCTAC  
1981 GTTTCGGTGA TGGCTACCGA TTACACCGAC GAACTGCGCC TCGGTGCGAT CAAAATGATT  
2041 TTCAAGTACC TGCCTCGCGC TTACAAAAC GGCACGAATG ACATCGAGGC GCGTGAGAAA  
2101 ATGGCCATG CAAGCAACAT CGCGGGCATG GCCTTCGCCA ACGCGTTCC TGGCGTGTGC  
2161 CACTCTATGG CTCACAAACT GGGTGTATG CACCACGTGC CGCACGGTAT CGCGTGTGCT  
2221 GTCCTGATCG AAGAAGTAAT TAAGTACAAC GCTACTGATT GCCCGACTAA ACAGACCGCC  
2281 TTCCCACAGT ACAAATCTCC TAACGCTAAA CGTAAGTACG CTGAGATCGC CGAATACCTG  
2341 AACCGAAGG GTACGAGCGA CACTGAGAAA GTTACTGCGC TGATCGAAGC TATCTCTAAA  
2401 CTGAAAATTG ACCTGTCCAT CCCGCGAAGC ATCAGCGCCG CAGGCATCAA CAAAAGGAC  
2461 TTTTACAACA CGCTGGACAA AATGAGCGAA CTGGCTTTTG ACGACCAGTG CACCACTGCA  
2521 AACCCGCGTT ACCCGCTGAT CTCTGAGCTG AAAGACATTT ATATCAAATC TTTTTAA

**AdhE2.76 (77005)**

1 ATGAAAGTGA CGAACCAAAA AGAACTGAAA CAAAACTGA ATGAACTGCG TGAGGCCCG  
61 AAAAAGTTCG CTACGTATAC CCAGGAGCAA GTTGACAAGA TCTTCAAACA GTGTGCCATT  
121 GCGGCTGCCA AAGAGCGTAT TAACTTGGCC AAAGTGGCGG TGAAGAAAC CGGCATCGGT  
181 CTGGTCGAGG ACAAGATTAT CAAGAATCAC TTTGCCGCGG AGTATATCTA CAACAAATAC  
241 AAAACGGTA AGACTTGCGG CATCATTGAT CATGATGACA GCTTGGGTAT CACGAAAGTC  
301 GCAGAACCAA TCGGTATTGT CGCGGCAATT GTCCCGACCA CTAATCCGAC CAGCACCGCG  
361 ATCTTCAAGA GCTTGATCAG CCTGAAAACC CGCAACGCGA TTTTCTTCAG CCCGCACCCG  
421 CGTGCGAAGA AGAGCACCAT CGCAGCGGCG ACCCTGATTT TGGATGCCCG GGTAAAGGCC  
481 GGTGCACCGA AAAACATTAT TGGCTGGATT GACGAGCCGA GCATTGAGCT GTCTCAGGAC  
541 CTGATGAGCG AAGCGGACAT TATCTGGCC ACCGGTGGTC CGTCTATGGT TAAGGCAGCG  
601 TACTCCAGCG GTAAGCCTGC TATCGGCGTT GGTGCGGGCA ATACGCCGGC TATCATCGAT  
661 GAAAGCGCGG ATATTGATAT GGCAGTTAGC TCCATCATTG TGTCAAAAC CTACGACAAT  
721 GGTGTTATCT GTGCAAGCGA GCAAAGCATC CTGGTGATGA ATAGCATTTA CGAGAAGGTC  
781 AAAGAAGAGT TTGTTAAGCG TGGTTCCTAT ATTCTGAACC AGAACGCGAT TGCAAAAATC  
841 AAAGAAACGA TGTTAAGAA TGGCGCGATT AATGCAGATA TTGTTGGTAA GTCCGCATAC  
901 ATTATCGCGA AGATGGCGGG TATCGAAGTG CCGCAAACCA CCAAATCTT GATCGGCGAA  
961 GTGCAGCAGC TGGAGAAGAG CGAACTGTTC AGCCATGAGA AACTGAGCCC GGTCTGGCT  
1021 ATGTACAAAG TGAAGGACTT TGACGAAGCC CTGAAGAAAG CTCAGCGTCT GATTCACCTG  
1081 GGCGGCAGCG GTCACACGAG CAGCCTGTAT ATCGATAGCC AAAACAATAA GGACAAGGTG

|      |            |            |            |            |            |            |
|------|------------|------------|------------|------------|------------|------------|
| 1141 | AAAGAGTTCG | GTCTGGCGAT | GAAAACCTCT | CGCACGTTTA | TCAACATGCC | GAGCAGCCAA |
| 1201 | GGTGCAGCG  | GCGATCTGTA | TAACCTCGCA | ATCGCGCCTT | CTTTTACGCT | GGGTTGCGGT |
| 1261 | ACCTGGGGCG | GTAATTCGGT | GAGCCAGAAT | GTCGAGCCGA | AGCACCTGCT | GAACATCAAA |
| 1321 | TCGGTCGCGG | AGCGCCGTGA | GAAGAGACCG | TGGTTCAAAG | TCCCACAGAA | AATTTACTTC |
| 1381 | AAATACGGCT | GCCTGCGTTT | CGCGCTGAAA | GAAGTAAAAG | ACATGAACAA | AAAGCGTGCG |
| 1441 | TTCATTGTTA | CCGACAAAGA | CCTGTTCAAA | CTGGGTTACG | TGAACAAAAT | CACCAAAGTT |
| 1501 | CTGGATGAAA | TTGACATCAA | GTACTCCATC | TTCAGTGATA | TCAAATCCGA | CCCAACGATT |
| 1561 | GATAGCGTGA | AAAAGGGCGC | TAAAGAAATG | CTGAACCTTG | AACCGGACAC | CATCATCAGC |
| 1621 | ATCGGTGGTG | GCTCTCCTAT | GGATGCTGCG | AAGGTCATGC | ACCTGCTGTA | CGAATACCCG |
| 1681 | GAAGCGGAAA | TCGAAAACCT | GGCTATCAAC | TTCATGGACA | TCCGCAAACG | TATCTGCAAC |
| 1741 | TTCCCGAAGC | TGGGCACTAA | AGCTATTTCC | GTTGCCATCC | CGACTACCCG | GGGCACTGGT |
| 1801 | TCCGAAGCCA | CGCCGTTGCG | CGTGATCACC | AACGATGAAA | CCGGTATGAA | ATACCCGCTG |
| 1861 | ACCTCTTACG | AACTGACCCC | GAACATGGCA | ATTATCGACA | CCGAGCTGAT | GCTGAACATG |
| 1921 | CCGCGCAAGC | TGACCGCTGC | TACCGGCATC | GACGCTCTGG | TACATGCTAT | TGAGGCGTAC |
| 1981 | GTTTCCGTGA | TGGTACCGA  | TTACACCGAC | GAAGTGGCCC | TGCGTGCGAT | CAAAATGATT |
| 2041 | TTCAAGTACC | TGCCTCGCGC | TTACAAAAAC | GGCACGAATG | ACATCGAGGC | GCGTGAGAAA |
| 2101 | ATGGCCCATG | CAAGCAACAT | CGCGGGCATG | GCCTTCGCCA | ACGCGTTTCT | GGGCGTGTGC |
| 2161 | CACCTATGAG | CTCACAAACT | GGGTGCTATG | CACCACGTGC | CGCACGGTAT | CGCGTGTGCT |
| 2221 | GTCCTGATCG | AAGAAGTAAT | TAAGTACAAC | GCTACTGATT | GCCCCACTAA | ACAGACCGCC |
| 2281 | TTCCACAGT  | ACAAATCTCC | TAACGCTAAA | CGTAAGTACG | CTGAGATCGC | CGAATACCTG |
| 2341 | AACCTGAAGG | GTACGAGCGA | CACTGAGAAA | GTTACTGCGC | TGATCGAAGC | TATCTCTAAA |
| 2401 | CTGAAAATTG | ACCTGTCCAT | CCCGCAGAAC | ATCAGCGCCG | CAGGCATCAA | CAAAAAGGAC |
| 2461 | TTTTACAACA | CGCTGGACAA | AATGAGCGAA | CTGGCTTTTG | ACGACCAGTG | CACCACTGCA |
| 2521 | AACCCGCGTT | ACCCGCTGAT | CTCTGAGCTG | AAAGACATTT | ATATCAAATC | TTTTTAA    |

**AdhE2.77 (77006)**

|      |             |            |            |            |             |             |
|------|-------------|------------|------------|------------|-------------|-------------|
| 1    | ATGAAAAGTGA | CGAACCAAAA | AGAAGTAAAA | CAAAAAGTGA | ATGAACTGCG  | TGAGGCCCCAG |
| 61   | AAAAAGTTCG  | CTACGATGAC | CCAGGAGCAA | GTTGAGAAGA | TCTTCAAACA  | GTGTGCCATT  |
| 121  | GCGGTCGCCA  | AACTGCGTAT | TAACCTGGCC | AAACTGGCGG | TGGAAGAAAAC | CGGCATCGGT  |
| 181  | CTGGTCGAGG  | ACAAGATTAT | CAAGAATCAC | TTTGCCGCGG | AGTATATCTA  | CAACAAATAC  |
| 241  | AAAAACGAAA  | AGACTTGCGG | CATCATTGAT | CATGATGACA | GCTTGGGTAT  | CACGAAAGTC  |
| 301  | GCAGAACCAA  | TCGTATTGTT | CGCGGCAATT | GTCCCGACCA | CTAATCCGAC  | CAGCACCGCG  |
| 361  | ATCTTCAAGA  | GCTTGATCAG | CCTGAAAACC | CGCAACGCGA | TTTTCTTCAG  | CCCGCACCCG  |
| 421  | CGTGCGAAGA  | AGAGCACCAT | CGCAGCGGAT | AAGCTGATTT | TGGATGCCGC  | GGTTAAGGCC  |
| 481  | GGTGCACCGA  | AAAACATTAT | TGGCTGGGTT | GACGAGCCGA | GCATTGAGCT  | GTCTCAGGAC  |
| 541  | CTGATGAGCG  | AAGCGGACAT | TATTCTGGCC | ACCGGTGGTC | CGTCTATGGT  | TAAGGCAGCG  |
| 601  | TACTCCAGCG  | GTAAGCCTGC | TATCGGCGTT | GGTGCGGGCA | ATACGCCGGC  | TATCATCGAT  |
| 661  | GAAAGCGCGG  | ATATTGATAT | GGCAGTTAGC | TCCATCATTC | TGTCCAAAAC  | CTACGACAAT  |
| 721  | GGTGTATCT   | GTGCAAGCGA | GCAAAGCATC | CTGGTGATGA | ATAGCATTTA  | CGAGAAGGTC  |
| 781  | AAAAAAGAGT  | TTGTTAAGCG | TGGTTCCTAT | ATTCTGAACC | AGAACGAGAT  | TGCAAAAATC  |
| 841  | AAAGAAACGA  | TGTTAAGAAA | TGGCGCGATT | AATGCAGATA | TTGTTGGTAA  | GTCCGCATAC  |
| 901  | ATTATCGCGA  | AGATGGCGGG | TATCGAAGTG | CCGCAATACA | CCAAAATCTT  | GATCGGCGAA  |
| 961  | GTGCAGAGCG  | TGGAGAAGAG | CGAACTGTTC | AGCCATGAGA | AACTGAGCCC  | GGTTCTGGCT  |
| 1021 | ATGTACAAAG  | TGAAGGACTT | TGACGAAGCC | CTGAAGAAAG | CTCAGCGTCT  | GATTGAGCTG  |
| 1081 | GGCGGCAGCG  | GTCACACGAG | CAGCCTGTAT | ATCGATAGCC | AAAACAATAA  | GGACAAGGTG  |
| 1141 | AAAGAGTTCG  | GTCTGGCGAT | GAAAACCTCT | CGCACGTTTA | TCAACATGCC  | GAGCAGCCAA  |
| 1201 | GGTGCAGCG   | GCGATCTGTA | TAACCTCGCA | ATCGCGCCTT | CTTTTACGCT  | GGGTTGCGGT  |
| 1261 | ACCTGGGGCG  | GTAATTCGGT | GAGCCAGAAT | GTCGAGCCGA | AGCACCTGCT  | GAACATCAAA  |
| 1321 | TCGGTCGCGG  | AGCGCCGTGA | GAAGAGACCG | TGGTTCAAAG | TCCCACAGAA  | AATTTACTTC  |
| 1381 | AAATACGGCT  | GCCTGCGTTT | CGCGCTGAAA | GAAGTAAAAG | ACATGAACAA  | AAAGCGTGCG  |
| 1441 | TTCATTGTTA  | CCGACAAAGA | CCTGTTCAAA | CTGGGTTACG | TGAACAAAAT  | CACCAAAGTT  |
| 1501 | CTGGATGAAA  | TTGACATCAA | GTACTCCATC | TTCAGTGATA | TCAAATCCGA  | CCCAACGATT  |
| 1561 | GATAGCGTGA  | AAAAGGGCGC | TAAAGAAATG | CTGAACCTTG | AACCGGACAC  | CATCATCAGC  |
| 1621 | ATCGGTGGTG  | GCTCTCCTAT | GGATGCTGCG | AAGGTCATGC | ACCTGCTGTA  | CGAATACCCG  |
| 1681 | GAAGCGGAAA  | TCGAAAACCT | GGCTATCAAC | TTCATGGACA | TCCGCAAACG  | TATCTGCAAC  |
| 1741 | TTCCCGAAGC  | TGGGCACTAA | AGCTATTTCC | GTTGCCATCC | CGACTACCCG  | GGGCACTGGT  |
| 1801 | TCCGAAGCCA  | CGCCGTTGCG | CGTGATCACC | AACGATGAAA | CCGGTATGAA  | ATACCCGCTG  |
| 1861 | ACCTCTTACG  | AACTGACCCC | GAACATGGCA | ATTATCGACA | CCGAGCTGAT  | GCTGAACATG  |
| 1921 | CCGCGCAAGC  | TGACCGCTGC | TACCGGCATC | GACGCTCTGG | TACATGCTAT  | TGAGGCGTAC  |
| 1981 | GTTTCCGTGA  | TGGTACCGA  | TTACACCGAC | GAAGTGGCCC | TGCGTGCGAT  | CAAAATGATT  |
| 2041 | TTCAAGTACC  | TGCCTCGCGC | TTACAAAAAC | GGCACGAATG | ACATCGAGGC  | GCGTGAGAAA  |
| 2101 | ATGGCCCATG  | CAAGCAACAT | CGCGGGCATG | GCCTTCGCCA | ACGCGTTTCT  | GGGCGTGTGC  |

|      |            |            |            |            |            |            |
|------|------------|------------|------------|------------|------------|------------|
| 2161 | CACTCTATGG | CTCACAAACT | GGTGCTATG  | CACCACGTGC | CGCACGGTAT | CGCGTGTGCT |
| 2221 | GTCCTGATCG | AAGAAGTAAT | TAAGTACAAC | GCTACTGATT | GCCCCACTAA | ACAGACCGCC |
| 2281 | TTCCCACAGT | ACAAATCTCC | TAACGCTAAA | CGTAAGTACG | CTGAGATCGC | CGAATACCTG |
| 2341 | AACCTGAAGG | GTACGAGCGA | CACTGAGAAA | GTTACTGCGC | TGATCGAAGC | TATCTCTAAA |
| 2401 | CTGAAAATTG | ACCTGTCCAT | CCCGCAGAAC | ATCAGCGCCG | CAGGCATCAA | CAAAAAGGAC |
| 2461 | TTTTACAACA | CGCTGGACAA | AATGAGCGAA | CTGGCTTTTG | ACGACCAGTG | CACCACTGCA |
| 2521 | AACCCGCGTT | ACCCGCTGAT | CTCTGAGCTG | AAAGACATTT | ATATCAAATC | TTTTTAA    |

**AdhE2.78 (77007)**

|      |             |            |            |            |             |            |
|------|-------------|------------|------------|------------|-------------|------------|
| 1    | ATGAAAGTGA  | CGAACCAAAA | AGAAGTAAA  | CAAAAAGTGA | ATGAAAGTGC  | TGAGGCCCG  |
| 61   | AAAAAGTTCG  | CTTGCATGAC | CCAGGAGCAA | GTTGACAAGA | TCTTCAAACA  | GTGTGCCATT |
| 121  | GCGGCTGCCA  | AAGAGCGTAT | TAAGTGGGCC | AAACTGGCGG | TGGAAGAAAC  | CGGCATCGGT |
| 181  | CTGGTCGAGG  | ACAAGATTAT | CAAGAATCAC | TTTGCCGCGG | AGTATATCTA  | CAACAAATAC |
| 241  | AAAAACGAAA  | AGACTTGCGG | CATCATTGAT | CATGATGACA | GCTTGGGTAT  | CACGAAAGTC |
| 301  | GCAGAACCAA  | TCGGTATTGT | CGCGGCAATT | GTCCCGACCA | CTAATCCGAC  | CAGCACCGCG |
| 361  | ATCTCAAGA   | GCTTGATCAG | CCTGAAAACC | CGCAACGCGA | TTTTCTTCAG  | CCCGCACCCG |
| 421  | CGTGCGAAGA  | AGAGCACCAT | CGCAGCGGCG | AAGCTGATTT | TGGATGCCGC  | GGTTAAGGCC |
| 481  | GGTGCACCGA  | AAAACATTAT | TGGCTGGATT | GACGAGCCGA | GCATTGAGCT  | GTCTCAGGAC |
| 541  | CTGATGAGCG  | AAGCGGACAT | TATTCTGGCC | ACCGGTGGTC | CGTCTATGGT  | TAAGGCAGCG |
| 601  | TACTCCAGCG  | GTAAGAAAAG | TATCGGCGTT | GGTGCGGGCA | ATACGCCGGC  | TATCATCGAT |
| 661  | GAAAGCGCGG  | ATATTGATAT | GGCAGTTAGC | TCCATCATTG | TGTCCAAAAC  | CTACGACAAT |
| 721  | GGTGTATCTG  | GTGCAAGCGA | GCAAAGCATC | CTGGTGATGA | ATAGCATTTA  | CGAGAAGGTC |
| 781  | AAAGAAGAGT  | TTGTTAAGCG | TGGTTCCTAT | ATTCTGAACC | AGAACGAGAT  | TGCAAAAATC |
| 841  | AAAGAAACGA  | TGTTAAGAA  | TGGCGCGATT | AATGCAGATA | TTGTTGGTAA  | GTCCGCATAC |
| 901  | ATTATCGCGA  | AGATGGCGGG | TATCGAAGTG | CCGCAAACCA | CCAAAATCTT  | GATCGGCGAA |
| 961  | GTGCAGAGCG  | TGGAGAAGAG | CGAACTGTTC | AGCCATGAGA | AACTGAGCCC  | GGTTCTGGCT |
| 1021 | ATGTACAAAAG | TGAAGGACTT | TGACGAAGCC | CTGAAGCTGG | CTCAGCGTCT  | GATTGAGCTG |
| 1081 | GGCGGCAGCG  | GTACACGAG  | CAGCCTGTAT | ATCGATAGCC | AAAACAATAA  | GGACAAGGTG |
| 1141 | AAAGATTTCG  | GTCTGGCGAT | GAAGACCTCT | ATCAGGTTTA | TCAACATGCC  | GAGCAGCCAA |
| 1201 | GGTGCAGAGC  | GCGATCTGTA | TAAGTTCGCA | ATCGCGCCTT | CTTTTACGCT  | GGGTTGCGGT |
| 1261 | ACCTGGGGCG  | GTAATTCGGT | GAGCCAGAAT | GTCGAGCCGA | AGCACCTGCT  | GAACATCAAA |
| 1321 | TCGGTCCGGG  | AGCGCCGTGA | GAAGAGACCG | TGTTCAAAG  | TCCCACAGAA  | AATTTACTTC |
| 1381 | AAATACGGCT  | GCCTGCGTTT | CGCGCTGAAA | GAAGTGAAG  | ACATGAACAA  | AAAGCGTGCG |
| 1441 | TTCATTGTTA  | CCGACAAAAG | CCTGTTCAAA | CTGGGTTACG | TGAACAAAAT  | CACCAAAGTT |
| 1501 | CTGGATGAAA  | TTGACATCAA | GTACTCCATC | TTCATGATA  | TCAAATCCGA  | CCCAACGATT |
| 1561 | GATAGCGTGA  | AAAAGGGCGC | TAAAGAAATG | CTGAAGTTTG | AACCGGACAC  | CATCATCAGC |
| 1621 | ATCGGTGGTG  | GCTCTCCTAT | GGATGCTGCG | AAGGTCATGC | ACCTGCTGTA  | CGAATACCCG |
| 1681 | GAAGCGGAAA  | TCGAAAACCT | GGCTATCAAC | TTCATGGACA | TCCGCAAACG  | TATCTGCAAC |
| 1741 | TTCCCGAAGC  | TGGGCACTAA | AGCTATTTCC | GTTGCCATCC | CGACTACCGC  | GGGCACTGGT |
| 1801 | TCCGAAGCCA  | CGCCGTTCCG | CGTGATCACC | AACGATGAAA | CCGGTATGAA  | ATACCCGCTG |
| 1861 | ACCTCTTACG  | AACTGACCCC | GAACATGGCA | ATTATCGACA | CCGAGCTGAT  | GCTGAACATG |
| 1921 | CCCGCAAGC   | TGACCGCTGC | TACCGGCATC | GACGCTCTGG | TACATGCTAT  | TGAGGCGTAC |
| 1981 | GTTTCCGTGA  | TGGCTACCGA | TTACACCGAC | GAAGTGGCCC | TGCGTGCAT   | CAAAAAGTAT |
| 2041 | TTCAAGTACC  | TGCCCTCGCG | TTACAAAAC  | GGCACGAATG | ACATCGAGGC  | GCGTGAGAAA |
| 2101 | ATGGCCATG   | CAAGCAACAT | CGCGGGCATG | GCCTTCGCCA | ACGCGTTCCCT | GGGCGTGTGC |
| 2161 | CACTCTATGG  | CTCACAAACT | GGTGCTATG  | CACCACGTGC | CGCACGGTAT  | CGCGTGTGCT |
| 2221 | GTCCTGATCG  | AAGAAGTAAT | TAAGTACAAC | GCTACTGATT | GCCCCACTAA  | ACAGACCGCC |
| 2281 | TTCCCACAGT  | ACAAATCTCC | TAACGCTAAA | CGTAAGTACG | CTGAGATCGC  | CGAATACCTG |
| 2341 | AACCTGAAGG  | GTACGAGCGA | CACTGAGAAA | GTTACTGCGC | TGATCGAAGC  | TATCTCTAAA |
| 2401 | CTGAAAATTG  | ACCTGTCCAT | CCCGCAGAAC | ATCAGCGCCG | CAGGCATCAA  | CAAAAAGGAC |
| 2461 | TTTTACAACA  | CGCTGGACAA | AATGAGCGAA | CTGGCTTTTG | ACGACCAGTG  | CACCACTGCA |
| 2521 | AACCCGCGTT  | ACCCGCTGAT | CTCTGAGCTG | AAAGACATTT | ATATCAAATC  | TTTTTAA    |

**AdhE2.79 (77008)**

|     |            |            |            |            |            |            |
|-----|------------|------------|------------|------------|------------|------------|
| 1   | ATGAAAGTGA | CGAACCAAAA | AGAAGTAAA  | CAAAAAGTGA | ATGAAAGTGC | TGAGGCCCG  |
| 61  | AAAAAGTTCG | CTACGTATAC | CCAGGAGCAA | GTTGACAAGA | TCTTCAAACA | GTGTGCCATT |
| 121 | GCGGCTGCCA | AAGAGCGTAT | TAAGTGGGCC | AAACTGGCGG | TGGAAGAAAC | CGGCATCGGT |
| 181 | CTGGTCGAGG | ACAAGATTAT | CAAGAATCAC | TTTGCCGCGG | AGTATATCTA | CAACAAATAC |
| 241 | AAAAACGAAA | AGACTTGCGG | CATCATTGAT | CATGATGACA | GCTTGGGTAT | CACGAAAGTC |
| 301 | GCAGAACCAA | TCGGTATTGT | CGCGGCAATT | GTCCCGACCA | CTAATCCGAC | CAGCACCGCG |
| 361 | ATCTCAAGA  | GCTTGATCAG | CCTGAAAACC | CGCAACGCGA | TTTTCTTCAG | CCCGCACCCG |
| 421 | CGTGCGAAGA | AGAGCACCAT | CGCAGCGGCG | AAGCTGATTT | TGGATGCCGC | GGTTAAGGCC |

481 GGTGCACCGA AAAACATTAT TGGCTGGATT GACGAGCCGA GCATTGAGCT GTCTCAGGAC  
 541 CTGATGAGCG AAGCGGACAT TATTCTGGCC ACCGGTGGTC CGTCTATGGT TAAGGCAGCG  
 601 TACTCCAGCG GTAAGCCTGC TATCGGCGTT GGTGCGGGCA ATACGCCGGC TATCATCGAT  
 661 GAAAGCGCGG ATATTGATAT GGCAGTTAGC TCCATCATTG TGTCCAAAAC CTACGACAAT  
 721 GGTGTTATCT GTGCAAGCGA GCAAAGCATC CTGGTGATGA ATAGCATTTA CGAGAAGGTC  
 781 AAAGAAGAGT TTGTTAAGCG TGGTTCCTAT ATTCTGAACC AGCAGGCGAT TGCAAAAATC  
 841 AAAGAAACGA TGTTAAGAA TGCGCGGATT AATGCAGATA TTGTTGGTAA GTCCGCATAC  
 901 ATTATCGCGA AGATGGCGGG TATCGAAGTG CCGCAATACA CCAAAATCTT GATCGGCGAA  
 961 GTGCAGAGCG TGGAGAAGAG CGAACTGTTC AGCCATGAGA AACTGAGCCC GGTTCCTGGCT  
 1021 ATGTACAAAG TGAAGGACTT TGACGAAGCC CTGAAGAAAG CTGAGCGTCT GATTGAGCTG  
 1081 GCGGCGAGCG GTCACACGAG CAGCCTGTAT AGCGATAGCC AAAACAATAA GGACAAGGTG  
 1141 AAAGAGTTTC GTCTGGCGAT GAAAACCTCT CGCACGTTTA TCAACATGCC GAGCAGCCAA  
 1201 GGTGCGAGCG GCGATCTGTA TAACTTCGCA ATCGCGCCTT CTTTTACGCT GGGTTGCGGT  
 1261 ACCTGGGGCG GTAATTCGGT GAGCCAGAAT GTCGAGCCGA AGCACCTGCT GAACATCAAA  
 1321 TCGGTCGCGG AGCGCCGTGA GAAGAGACCG TGGTTCAAAG TCCCACAGAA AATTTACTTC  
 1381 AAATACGGCT GCCTGCGTTT CGCGCTGAAA GAACTGAAAG ACATGAACAA AAAGCGTGCG  
 1441 TTCATTGTTA CCGACAAAGA CCTGTTCAA CTGGGTTACG TGAACAAAAT CACCAAAGTT  
 1501 TTGGATGAAA TTGACATCAA GTACTCCATC TTCACTGATA TCAAATCCGA CCCAACGATT  
 1561 GATAGCGTGA AAAAGGGCGC TAAAGAAATG CTGAACTTTG AACCGGACAC CATCATCAGC  
 1621 ATCGGTGGTG GCTCTCCTAT GGATGCTGCG AAGGTCATGC ACCTGCTGTA CGAATACCCG  
 1681 GAAGCGGAAA TCGAAAACCT GGCTATCAAC TTCATGGACA TCCGAAAACG TATCTGCAAC  
 1741 TTCCCGAAGC TGGGCACTAA AGCTATTTCC GTTGCCATCC CGACTACCGC GGGCACTGGT  
 1801 TCCGAAGCCA CGCCGTTGCG CGTGATCACC AACGATGAAA CCGGTATGAA ATACCCGCTG  
 1861 ACCTCTTACC AACTGACCCC GAACATGGCA ATTATCGACA CCGAGCTGAT GCTGAACATG  
 1921 CCGCGCAAGC TGACCCTGTC TACCGGCATC GACGCTCTGG TACATGCTAT TGAGGCGTAC  
 1981 GTTTCCTGTA TGGTACCGA TTACACCGAC GAACTGGCCC TCGTGCATG CAAAATGATT  
 2041 TTCAAGTACC TGCTCGCGC TTACAAAAC GGCACGAATG ACATCGAGGC GCGTGAGAAA  
 2101 ATGGCCCATG CAAGCAACAT CGCGGGCATG GCCTTCGCCA ACGCGTTCC TGGCGTGTGC  
 2161 CACTCTATGG CTCACAAACT GGGTGTATG CACCACGTGC CGCACGGTAT CGCGTGTGCT  
 2221 GTCCTGATG AAGAAGTAA TAAGTACAAC GCTACTGATT GCCCGACTAA ACAGACCCGC  
 2281 TTCCACAGT ACAAACTCTC TAACGCTAAA CGTAAGTACG CTGAGATCGC CGAATACCTG  
 2341 AACCTGAAGG GTACGAGCGA CACTGAGAAA GTTACTGCGC TGATCGAAGC TATCTCTAAA  
 2401 CTGAAAATTG ACCTGTCCAT CCCGAGAAC ATCAGCGCCG CAGGCATCAA CAAAAGGAC  
 2461 TTTTACAACA CGCTGGACAA AATGAGCGAA CTGGCTTTTG ACGACCAGTG CACCACTGCA  
 2521 AACCCGCGTT ACCCGCTGAT CTCTGAGCTG AAAGACATTT ATATCAAATC TTTTTAA

**AdhE2.80 (77009 )**

1 ATGAAAGTGA CGAACCAAAA AGAACTGAAA CAAAACTGA ATGAACTGCG TGAGGCCAG  
 61 AAAAAAGTTCG CTACGTATAC CCAGGCGCAA GTTGACAAGA TCTTCAAACA GTGTGCCATT  
 121 GCGGCTGCCA AAGAGCGTAT TAACTTGGCC AAAGTGGCGG TGAAGAAAC CGGCATCGGT  
 181 CTGGTCGAGG ACAAGATTAT CAAGAATCAC TTTGCCGCGG AGTATATCTA CAACAAATAC  
 241 AAAAAAGAAA AGACTTGCAG CATCATTGAT CATGATGACA GCTTGGGTAT CACGAAAGTC  
 301 GCAGAACCAA TCGGTATTGT CGCGGCAATT GTCCCGACCA CTAATCCGAC CAGCACCGCG  
 361 ATCTTCAAGA GCTTGATCAG CCTGAAAACC CGCAACGCGA TTTTCTTCAG CCCGCACCCG  
 421 CGTGCGAAGA AGAGCACCAT CGCAGCGGCG AAGCTGATTT TGATGCGCG GGTAAAGGCC  
 481 GGTGCACCGA AAAACATTAT TGGCTGGATT GACGAGCCGA GCATTGAGCT GTCTCAGGAC  
 541 CTGATGAGCG AAGCGGACAT TATTCTGGCC ACCGGTGGTC CGTCTATGGT TAAGGCAGCG  
 601 TACTCCAGCG GTAAGCCTGC TATCGGCGCG GGTGCGGGCA ATACGCCGGC TATCATCGAT  
 661 GAAAGCGCGG ATATTGATAT GGCAGTTAGC TCCATCATTG TGTCCAAAAC CTACGACAAT  
 721 AACGTTATCT GTGCAAGCGA GCAAAGCATC CTGGTGATGA ATAGCATTTA CGAGAAGGTC  
 781 AAAAAAGAGT TTGTTAAGCG TGGTTCCTAT ATTCTGAACC AGAACGAGAT TGCAAAAATC  
 841 AAAGAAACGA TGTTAAGAA TGCGCGGATT AATGCAGATA TTGTTGGTAA GTCCGCATAC  
 901 ATTATCGCGA AGATGGCGGG TATCGAAGTG CCGCAAACCA CCAAAATCTT GATCGGCGAA  
 961 GTGCAGCACG TGGAGAAGAG CGAACTGTTC AGCCATGAGA AACTGAGCCC GGTTCCTGGCT  
 1021 ATGTACAAAG TGAAGGACTT TGACGAAGCC CTGAAGAAAG CTGAGCGTCT GATTGAGCTG  
 1081 GCGGCGAGCG GTCACACGAG CAGCCTGTAT ATCGATAGCC AAAACAATAA GGACAAGGTG  
 1141 AAAGAGTTTC GTCTGGCGAT GAAAACCTCT CGCACGTTTA TCAACATGCC GAGCAGCCAA  
 1201 GGTGCGAGCG GCGATCTGTA TAACTTCGCA ATCGCGCCTT CTTTTACGCT GGGTTGCGGT  
 1261 ACCTGGGGCG GTAATTCGGT GAGCCAGAAT GTCGAGCCGA AGCACCTGCT GAACATCAAA  
 1321 TCGGTCGCGG AGCGCCGTGA GAAGAGACCG TGGTTCAAAG TCCCACAGAA AATTTACTTC  
 1381 AAATACGGCT GCCTGCGTTT CGCGCTGAAA GAACTGAAAG ACATGAACAA AAAGCGTGCG  
 1441 TTCATTGTTA CCGACAAAGA CCTGTTCAA CTGGGTTACG TGAACAAAAT CACCAAAGTT

1501 CTGGATGAAA TTGACATCAA GTACTCCATC TTCACTGATA TCAAATCCGA CCCAACGATT  
1561 GATAGCGTGA AAAAGGGCGC TAAAGAAATG CTGAACTTTG AACCGGACAC CATCATCAGC  
1621 ATCGGTGGTG GCTCTCCTAT GGATGCTGCG AAGGTCATGC ACCTGCTGTA CGAATACCCG  
1681 GAAGCGGAAA TCGAAAACCT GGCTATCAAC TTCATGGACA TCCGAAAACG TATCTGCAAC  
1741 TTCCCGAAGC TGGGCACTAA AGCTATTTCC GTTGCCATCC CGACTACCGC GGGCACTGGT  
1801 TCCGAAGCCA CGCCGTTCGC CGTGATCACC AACGATGAAA CCGGTATGAA ATACCCGCTG  
1861 ACCTCTTACG AACTGACCCC GAACATGGCA ATTATCGACA CCGAGCTGAT GCTGAACATG  
1921 CCGCGCAAGC TGACCGCTGC TACCGGCATC GACGCTCTGG TACATGCTAT TGAGGCGTAC  
1981 GTTTCGGTGA TGGCTACCGA TTACACCGAC GAACTGGCCC TCGGTGCGAT CAAAATGATT  
2041 TTCAAGTACC TGCCCTCGGC TTACAAAAAC GGCACGAATG ACATCGAGGC GCGTGAGAAA  
2101 ATGGCCCATC AAGCAACAT CGCGGGCATG GCCTTCGCCA ACGCGTTCCT GGGCGTGTGC  
2161 CACTCTATGG CTCACAAACT GGGTGCTATG CACCACGTGC CGCACGGTAT CGCGTGTGCT  
2221 GTCCTGATCG AAGAAGTAAT TAAGTACAAC GCTACTGATT GCCCGACTAA ACAGACCGCC  
2281 TTCCACAGT ACAAATCTCC TAACGCTAAA CGTAAGTACG CTGAGATCGC CGAATACCTG  
2341 AACCTGAAGG GTACGAGCGA CACTGAGAAA GTTACTGCGC TGATCGAAGC TATCTCTAAA  
2401 CTGAAAATTG ACCTGTCCAT CCCGAGAAC ATCAGCGCCG CAGGCATCAA CAAAAGGAC  
2461 TTTTACAACA CGCTGGACAA AATGAGCGAA CTGGCTTTTG ACGACCAGTG CACCCTGCA  
2521 AACCCGCGTT ACCCGCTGAT CTCTGAGCTG AAAGACATTT ATATCAAATC TTTTTTAA

**AdhE2.81 (77010)**

1 ATGAAAAGTGA CGAACCAAAA AGAACTGAAA CAAAAACTGA ATGAACTGCG TGAGGCCCGAG  
61 AAAAAGTTTCG CTAGCTATAC CCAGGCGCAA GTTGACAAGA TCTTCAAACA GTGTGCCATT  
121 GCGGCTGCCA AAGAGCGTAT TAACTTGGCC AAACTGGCGG TGAAGAAAAC CGGCATCGGT  
181 CTGGTCGAGG ACAAGATTAT CAAGAATCAC TTTGCCGCGG AGTATATCTA CAACAAATAC  
241 AAAAACCACA AACTTGCAGG CATCATTGAT CATGATGACA GCTTGGGTAT CACGAAAGTC  
301 GCAGAACCAA TCGGTATTGT CGCGGCAATT GTCCCGACCA CTAATCCGAC CAGCACCGCG  
361 ATCTTCAAGA GCTTGATCAG CCTGAAAACC CGCAACGCGA TTTTCTTCAG CCCGCACCCG  
421 CGTGCGAAGA AGAGCACCAT CGCAGCGGCG AAGCTGATTT TGGATGCCGC GGTTAAGGCC  
481 GGTGCACCGA AAAACATTAT TGGCTGGATT GACGAGCCGA GCATTGAGCT GTCTCAGGAC  
541 CTGATGAGCG AAGCGGACAT TATTCTGGCC ACCGGTGGTC CGTCTATGGT TAAGGCAGCG  
601 TACTCCAGCG GTAAGCCTGC TATCGGCGTT GGTGCGGGCA ATACGCCGGC TATCATCGAT  
661 GAAAGCGCGG ATATTGATAT GGCAGTTAGC TCCATCATTC TGTCAAAAC CTACGACAAT  
721 GGTGTTATCT GTGCAAGCGA GCAAAGCATC CTGGTGATGA ATAGCATTTA CGAGAAGGTC  
781 AAAGAAGAGT TTGTTAAGCG TGTTTCCTAT ATTCTGAACC AGAACGAGAT TGCAAAAATC  
841 AAAGAAAAGT TGTTAAGAA TGGCGCGATT AATGCAGATA TTGTTGGTAA GTCCGATAC  
901 ATTTATCGCGA AGATGGCGGG TATCGAAGTG CCGCAAACCA CCAAATCTTT GATCGGCGAA  
961 GTGCAGAGCG TGGAGAAGAG CGAACTGTTC AGCGTTGAGA AACTGAGCCC GGTTCCTGGCT  
1021 ATGTACAAAG TGAAGGACTT TGACGAAGCC CTGAAGAAAG CTCAGCGTCT GATTGAGCTG  
1081 GGCGCAGCG GTACACAGAG CAGCCTGTAT ATCGATAGCC AAAACAATAA GGACAAGGTG  
1141 AAAGAGTTTCG GTCTGCGTAT GAAAACCTCT CGCACGTTTA TCAACATGCC GAGCAGCCAA  
1201 GGTGCGAGCG GCGATCTGTA TAACTTCGGA ATCGCGCCTT CTTTTACGCT GGGTTCGGT  
1261 ACCTGGGCGG GTAATTTCGGT GAGCCAGAAT GTCGAGCCGA AGCACCTGCT GAACATCAA  
1321 TCGGTGCGCG AGCGCCGTGA GAAGAGACCG TGGTTCAAAG TCCCACAGAA AATTTACTTC  
1381 AAATACGGCT GCCTGCGTTT CGCGCTGAAA GAACTGAAAG ACATGAACAA AAAGCGTGCG  
1441 TTCATTGTTA CCGACAAAGA CCTGTTCAAA CTGGGTTACG TGAACAAAAT CACCAAAGTT  
1501 CTGGATGAAA TTGACATCAA GTACTCCATC TTCACTGATA TCAAATCCGA CCCAACGATT  
1561 GATAGCGTGA AAAAGGGCGC TAAAGAAATG CTGAACTTTG AACCGGACAC CATCATCAGC  
1621 ATCGGTGGTG GCTCTCCTAT GGATGCTGCG AAGGTCATGC ACCTGCTGTA CGAATACCCG  
1681 GAAGCGGAAA TCGAAAACCT GGCTATCAAC TTCATGGACA TCCGAAAACG TATCTGCAAC  
1741 TTCCCGAAGC TGGGCACTAA AGCTATTTCC GTTGCCATCC CGACTACCGC GGGCACTGGT  
1801 TCCGAAGCCA CGCCGTTCGC CGTGATCACC AACGATGAAA CCGGTATGAA ATACCCGCTG  
1861 ACCTCTTACG AACTGACCCC GAACATGGCA ATTATCGACA CCGAGCTGAT GCTGAACATG  
1921 CCGCGCAAGC TGACCGCTGC TACCGGCATC GACGCTCTGG TACATGCTAT TGAGGCGTAC  
1981 GTTTCGGTGA TGGCTACCGA TTACACCGAC GAACTGGCCC TCGGTGCGAT CAAAATGATT  
2041 TTCAAGTACC TGCCCTCGGC TTACAAAAAC GGCACGAATG ACATCGAGGC GCGTGAGAAA  
2101 ATGGCCCATG CAAGCAACAT CGCGGGCATG GCCTTCGCCA ACGCGTTCCT GGGCGTGTGC  
2161 CACTCTATGG CTCACAAACT GGGTGCTATG CACCACGTGC CGCACGGTAT CGCGTGTGCT  
2221 GTCCTGATCG AAGAAGTAAT TAAGTACAAC GCTACTGATT GCCCGACTAA ACAGACCGCC  
2281 TTCCACAGT ACAAATCTCC TAACGCTAAA CGTAAGTACG CTGAGATCGC CGAATACCTG  
2341 AACCTGAAGG GTACGAGCGA CACTGAGAAA GTTACTGCGC TGATCGAAGC TATCTCTAAA  
2401 CTGAAAATTG ACCTGTCCAT CCCGAGAAC ATCAGCGCCG CAGGCATCAA CAAAAGGAC  
2461 TTTTACAACA CGCTGGACAA AATGAGCGAA CTGGCTTTTG ACGACCAGTG CACCCTGCA

2521 AACCCGCGTT ACCCGCTGAT CTCTGAGCTG AAAGACATTT ATATCAAATC TTTTAA

**AdhE2.82 (77011)**

1 ATGAAAAGTGA CGAACCAAAA AGAACTGAAA CAAAAACTGA ATGAACTGCG TGAGGCCAG  
61 AAAAAAGTTTCG CTACGTATAC CCAGGACCAA GTTGACAAGA TCTTCAAACA GTGTGCCATT  
121 GCGGCTGCCA AAGAGCGTAT TAACTTGGCC AAAGTGGCGG TGAAGAAAAC CGGCATCGGT  
181 CTGGTCGAGG ACAAGATTAT CAAGAATCAC TTTGCCGCGG AGTATATCTA CAACAAATAC  
241 AAAAAACGAAA AGACTTGCGG CATCATTGAT CATGATGACA GCTTGGGTAT CACGAAAGTC  
301 GCAGAACCAA TCGGTATTGT CGCGGCAATT GTCCCGACCA CTAATCCGAC CAGCACCGCG  
361 ATCTTCAAGA GCTTGATCAG CCTGAAAACC CGCAACGCGA TTTTCTTCAG CCCGCACCCG  
421 CGTGCGAAGA AGAGCACCAT CGCAGCGGCG AAGCTGATTT TGGATGCCCG GGTAAAGGCC  
481 GGTGCACCGA AAAACATTAT TGGCTGGATT GACGAGCCGA GCATTGAGCT GTCTCAGGAC  
541 CTGATGAGCG AAGCGGACAT TATTCTGGCC ACCGGTGGTC CGTCTATGGT TAAGGCAGCG  
601 TACTCCAGCG GTAAGCCTGC TATCGGCGTT GGTGCGGGCA ATACGCCGGC TATCATCGAT  
661 GAAAGCGCGG ATATTGATAT GGCAGTTAGT TCCATCATTG TGTTCAAAC CTACGACAAT  
721 AACGTTATCT GTGCAAGCGA GCAAAGCATC CTGGTGATGA ATAGCATTTA CGAGAAGGTC  
781 AAAGAAGAGT TTGTTAAGCG TGGTTCCTAT ATTCTGAACC AGAACGAGAT TGCAAAAATC  
841 AAAGAAACGA TGTTAAGAA TGCGCGGATT AATGCAGATA TTGTTGGTAA GTCCGCATAC  
901 ATTATCGCGA AGATGGCGGG TATCGAAGTG CCGCAAACCA CCAAATCTT GATCGGCGAA  
961 GTGCAGAGCG TGGAGGCGAG CGAACTGTTT AGCCATGAGA AACTGAGCCC GGTTCCTGGCT  
1021 ATGTACAAAG TGAAGGACTT TGACGAAGAT CTGAAGAAAG CTCAGCGTCT GATTGAGCTG  
1081 GCGGCGAGCG GTCACACGAG CAGCCTGTAT ATCGATAGCC AAAACAATAA GGACAAGGTG  
1141 AAAGAGTTTCG GTCTGGCGAT GAAAACCTCT ATCACGTTTA TCAACATGCC GAGCAGCCAA  
1201 GGTGCGAGCG GCGATCTGTA TAACTTCGCA ATCGCGCCTT CTTTTACGCT GGGTTGCGGT  
1261 ACCTGGGAGG GTAATTTCGGT GAGCCAGAAT GTCGAGCCGA AGCACCTGCT GAACATCAAA  
1321 TCGTTCGCGG AGCGCCGTGA GAAGAGACCG TGTTCAAAG TCCCACAGAA AATTTACTTC  
1381 AAATACGGTT GCCTGCGTTC CGCGCTGAAA GAACTGAAAG ACATGAACAA AAAGCGTGCG  
1441 TTCATTGTTA CCGACAAAGA CCTGTTCAA CTGGGTTACG TGAACAAAAT CACCAAAGTT  
1501 CTGGATGAAA TTGACATCAA GTACTCCATC TCACTGATA TCAAATCCGA CCCAACGATT  
1561 GATAGCGTGA AAAAGGGCGC TAAAGAAATG CTGAACTTTG AACCGGACAC CATCATCAGC  
1621 ATCGGTGGTG GCTCTCCTAT GGATGCTGCG AAGGTCATGC ACCTGCTGTA CGAATACCCG  
1681 GAAGCGGAAA TCGAAAACCT GGCTATCAAC TTCATGGACA TCCGCAAACG TATCTGCAAC  
1741 TTCCCGAAGC TGGGCACTAA AGCTATTTCC GTTGCCATCC CGACTACCGC GGGCACTGGT  
1801 TCCGAAGCCA CGCCGTTCCG CGTGATCACC AACGATGAAA CCGGTATGAA ATACCCGCTG  
1861 ACCTCTTACG AACTGACCCG GAACATCGCA ATTATCGACA CCGAGCTGAT GTGACCATG  
1921 CCGCGCAAGC TGACCGCTGC TACCGGCATC GACGCTCTGG TACATGCTAT TGAGGCGTAC  
1981 GTTTCGCTGA TGGTACCGA TTACACCGAC GAACTGGCCC TGCGTGCGAT CAAAATGATT  
2041 TTCAAGTACC TGCTCGCGC TTACAAAAC GGCACGAATG ACATCGAGGC GCGTGAGAAA  
2101 ATGGCCCATG CAAGCAACAT CGCGGGCATG GCCTTCGCCA ACGCGTTCC TGGCGTGTGC  
2161 CACTCTATGG CTCACAAACT GGGTGTATG CACCACGTGC CGCACGGTAT CGCGTGTGCT  
2221 GTCTGATCG AAGAAGTAAT TAAGTACAAC GCTACTGATT GCCCGACTAA ACAGACCGCC  
2281 TTCCACAGT ACAATCTCC TAACGCTAAA CGTAAGTACG CTGAGATCGC CGAATACCTG  
2341 AACCTGAAGG GTACGAGCGA CACTGAGAAA GTTACTGCGC TGATCGAAGC TATCTCTAAA  
2401 CTGAAAATTG ACCTGTCCAT CCCGAGAAC ATCAGCGCCG CAGGCATCAA CAAAAGGAC  
2461 TTTTACAACA CGCTGGACAA AATGAGCGAA CTGGCTTTTG ACGACCAGTG CACCACTGCA  
2521 AACCCGCGTT ACCCGCTGAT CTCTGAGCTG AAAGACATTT ATATCAAATC TTTTAA

**AdhE2.83 (77012)**

1 ATGAAAAGTGA CGAACCAAAA AGAACTGAAA CAAAAACTGA ATGAACTGCG TGAGGCCAG  
61 AAAAAAGTTTCG CTACGTATAC CCAGGAGCAA GTTGACAAGA TCTTCAAACA GTGTGCCATT  
121 GCGGCTGCCA AAGAGCGTAT TAACTTGGCC AAAGTGGCGG TGAAGAAAAC CGGCATCGGT  
181 CTGGTCGAGG ACAAGATTAT CAAGAATCAC TTTGCCGCGG AGTATATCTA CAACAAATAC  
241 AAAAAACGAAA AGACTTGCGG CATCATTGAT CATGATGACA GCTTGGGTAT CACGAAAGTC  
301 GCAGAACCAA TCGGTATTGT CGCGGCAATT GTCCCGACCA CTAATCCGAC CAGCACCGCG  
361 ATCTTCAAGA GCTTGATCAG CCTGAAAACC CGCAACGCGA TTTTCTTCAG CCCGCACCCG  
421 CGTGCGAAGA AGAGCACCAT CGCAGCGGCG ACCCTGATTT TGGATGCCCG GGTAAAGGCC  
481 GGTGCACCGA AAAACATTAT TGGCTGGATT GACGAGCCGA GCATTGAGCT GTCTCAGGAC  
541 CTGATGAGCG AAGCGGACAT TATTCTGGCC ACCGGTGGTC CGTCTATGGT TAAGGCAGCG  
601 TACTCCAGCG GTAAGCCTGC TATCGGCGTT GGTGCGGGCA ATACGCCGGC TATCATCGAT  
661 GAAAGCGCGG ATATTGATAT GGCAGTTAGT TCCATCATTG TGGGTAAAAC CTACGACAAT  
721 GGTGTTATCT GTGCAAGCGA GCAAAGCATC CTGGTGATGA ATAGCATTTA CGAGAAGGTC  
781 AAAGAAGAGT TTGTTAAGCG TGGTTCCTAT ATTCTGAACC AGAACGAGAT TGCAAAAATC

|      |             |            |            |            |             |            |
|------|-------------|------------|------------|------------|-------------|------------|
| 841  | AAAGAAACGA  | TGTTTAAGAA | TGGCGCGATT | AATGCAGATA | TTGTTGGTAA  | GTCCGCATAC |
| 901  | ATTATCGCGA  | AGATGGCGGG | TATCGAAGTG | CCGCAAACCA | CCAAAATCTT  | GATCGGCGAA |
| 961  | GTGCAGAGCG  | TGGAGAAGAG | CGAACTGTTC | AGCCATGAGC | TGCTGAGCCC  | GGTTCTGGCT |
| 1021 | ATGTACAAAG  | TGAAGGACTT | TGACGAAGCC | CTGAAGAAAG | CTCAGCGTCT  | GATTGAGCTG |
| 1081 | GGCGGCAGCC  | ACACACGAG  | CAGCCTGTAT | ATCGATAGCC | AAAACAATAA  | GGACAAGGTG |
| 1141 | AAAGAGTTCG  | GTCTGGAGAT | GAAAACCTCT | CGCACGTTTA | TCAACATGCC  | GAGCAGCCAA |
| 1201 | GGTGCAGCG   | GCGATCTGTA | TAACCTCGCA | ATCGCGCCTT | CTTTTACGCT  | GGGTTGCGGT |
| 1261 | ACCTGGGGCG  | GTAATTCGGT | GAGCCAGAAT | GTCGAGCCGA | AGCACCTGCT  | GAACATCAAA |
| 1321 | TCGGTCGCGG  | AGCGCCGTGA | GAAGAGACCG | TGGTTCAAAG | TCCCACAGAA  | AATTTACTTC |
| 1381 | AAATACGGCT  | GCCTGCGTTT | CGCGCTGAAA | GAAGTGAAG  | ACATGAACAA  | AAAGCGTGCG |
| 1441 | TTCATTTGTA  | CCGACAAAGA | CCTGTTCAA  | CTGGGTTACG | TGAACAAAAT  | CACCAAAGTT |
| 1501 | CTGGATGAAA  | TTGACATCAA | GTACTCCATC | TTCACTGATA | TCAAATCCGA  | CCCAACGATT |
| 1561 | GATAGCGTGA  | AAAAGGGCGC | TAAAGAAATG | CTGAACTTTG | AACCGGACAC  | CATCATCAGC |
| 1621 | ATCGGTGGTG  | GCTCTCCTAT | GGATGCTGCG | AAGGTCATGC | ACCTGCTGTA  | CGAATACCCG |
| 1681 | GAAGCGGAAA  | TCGAAAACCT | GGTATCAAC  | TTCATGGACA | TCCGCAAACG  | TATCTGCAAC |
| 1741 | TTCCCGAAGC  | TGGGCACTAA | AGCTATTTCC | GTTGCCATCC | CGACTACCGC  | GGGCACTGGT |
| 1801 | TCCGAAGCCA  | CGCCGTTTCG | CGTGATCACC | AACGATGAAA | CCGGTATGAA  | ATACCCGCTG |
| 1861 | ACCTCTTACG  | AACGACCCC  | GAACATGGCA | ATTATCGACA | CCGAGCTGAT  | GCTGAACATG |
| 1921 | CCGCGCAAGC  | TGACCGCTGC | TACCGGCATC | GACGCTCTGG | TACATGCTAT  | TGAGGCGTAC |
| 1981 | GTTTCCGTGA  | TGGCTACCGA | TTACACCGAC | GAAGTGGCCC | TGCGTGCGAT  | CAAAATGATT |
| 2041 | TTCAAGTACC  | TGCCTCGCGC | TTACAAAAAC | GGCACGAATG | ACATCGAGGC  | GCGTGAGAAA |
| 2101 | ATGGCCCATG  | CAAGCAACAT | CGCGGGCATG | GCCTTCGCCA | ACGCGTTCCCT | GGGCGTGTGC |
| 2161 | CACCTATGCG  | CTCACAAACT | GGGTGCTATG | CACCACGTGC | CGCACGGTAT  | CGCGTGTGCT |
| 2221 | TCCTGATCG   | AAGAAGTAAT | TAAGTACAAC | GCTACTGATT | GCCCCACTAA  | ACAGACCCGC |
| 2281 | TTCCACACAGT | ACAAATCTCC | TAACGCTAAA | CGTAAGTACG | CTGAGATCGC  | CGAATACCTG |
| 2341 | AACCTGAAGG  | GTACGAGCGA | CACTGAGAAA | GTTACTGCGC | TGATCGAAGC  | TATCTCTAAA |
| 2401 | CTGAAAATTG  | ACCTGTCCAT | CCCGCAGAAC | ATCAGCGCCG | CAGGCATCAA  | CAAAAAGGAC |
| 2461 | TTTTACAACA  | CGCTGGACAA | AATGAGCGAA | CTGGCTTTTG | ACGACCAGTG  | CACCACTGCA |
| 2521 | AACCCGCGTT  | ACCCGCTGAT | CTCTGAGCTG | AAAGACATTT | ATATCAAATC  | TTTTTTAA   |

**AdhE2.84 (77013)**

|      |             |            |             |            |            |            |
|------|-------------|------------|-------------|------------|------------|------------|
| 1    | ATGAAAGTGA  | CGAACCAAAA | AGAAGTGA    | CAAAAAGTGA | ATGAAAGTGA | TGAGGCCAG  |
| 61   | AAAAAGTTCG  | CTACGTATAC | CCAGGAGCAA  | GTTGAGAAGT | TCTTCAAACA | GTGTGCCATT |
| 121  | GCGGCTGCCA  | AAGAGCGTAT | TAACCTGGCC  | AAACTGGCGG | TGGAAGAAAC | CGGCATCGGT |
| 181  | CTGGTCGAGG  | ACAAGATTAT | CAAGAATCAC  | TTTCCGCGCG | AGTATATCTA | CAACAAATAC |
| 241  | AAAAACGAAA  | AGACTTGGCG | CATCATTGAT  | CATGATGACA | GCTTGGGTAT | CACGAAAGTC |
| 301  | GCAGAACCAA  | TCGGTATTGT | CGCGAGCATT  | GTCCCGACCA | CTAATCCGAC | CAGCACCAGC |
| 361  | ATCTTCAAGA  | GCTTGATCAG | CCTGAAAACC  | CGCAACGCGA | TTTTCTTCAG | CCCGCACCCG |
| 421  | CGTGCGAAGA  | AGAGCACCAT | CGCAGCGGCG  | AAGCTGATTT | TGGATGCCCG | GGTTAAGGCC |
| 481  | GGTGCACCGA  | AAAACATTAT | TGGCTGGATT  | GACGAGCCGA | GCATTGAGCT | GTCTCAGGAC |
| 541  | CTGATGAGCG  | AAGCGGACAT | TATCTGGCC   | ACCGGTGGTC | CGTCTATGGT | TAAGGCAGCG |
| 601  | TACTCCAGCG  | GTAAGCCTGC | TATCGCGGTT  | GGTGCGGGCA | ATACGCCGCG | TATCATCGAT |
| 661  | GAAAGCGCGG  | ATATTGATAT | GGCAGTTAGC  | TCCATCATTC | TGTCCAAAAC | CTACGACAAT |
| 721  | GGTGTATCT   | GTGCAAGCGA | GCAAAGCATC  | CTGGTGATGA | ATAGCATTTA | CGAGAAGGTC |
| 781  | AAAGAAAGAGT | TTGTTAAGCG | TGGTTCCCTAT | ATTCTGAACC | AGAACGAGAT | TGCAAAAATC |
| 841  | AAAGAAACGA  | TGTTTAAGAA | TGGCGCGATT  | AATGCAGATA | TTGTTGGTAA | GTCCGCATAC |
| 901  | ATTATCGCGA  | AGATGGCGGG | TATCGAAGTG  | CCGCAAACCA | CCAAAATCTT | GATCGGCGAA |
| 961  | GTGCAGAGCG  | TGGAGAAGAG | CGAACTGTTC  | AGCCATGAGC | AGCTGAGCCC | GGTTCTGGCT |
| 1021 | ATGTACAAAG  | TGAAGGACTT | TGACGAAGCC  | CTGAAGAAAG | CTCAGCGTCT | GATTGAGCTG |
| 1081 | GGCGGCAGCG  | GTACACGAG  | CAGCCTGTAT  | ATCGATAGCC | AAAACAATAA | GGACAAGGTG |
| 1141 | AAAGAGTTCG  | GTCTGGCGAT | GAAAACCTCT  | CGCACGTTTA | TCAACATGCC | GAGCAGCCAA |
| 1201 | GGTGCAGCG   | GCGATCTGTA | TAACCTCGCA  | ATCGCGCCTT | CTTTTACGCT | GGGTTGCCCC |
| 1261 | ACCTGGGGCG  | GTAATTCGGT | GAGCCAGAAT  | GTCGAGCCGA | AGCACCTGCT | GAACATCAAA |
| 1321 | TCGGTCGCGC  | GTCGCCGTGA | GAAGAGACCG  | TGGTTCAAAG | TCCCACAGAA | AATTTACTTC |
| 1381 | AAATACGGCT  | GCCTGCGTTT | CGCGCTGAAA  | GAAGTGAAG  | ACATGAACAA | AAAGCGTGCG |
| 1441 | TTCATTTGTTA | CCGACAAAGA | CCTGTTCAA   | CTGGGTTACG | TGAACAAAAT | CACCAAAGTT |
| 1501 | CTGGATGAAA  | TTGACATCAA | GTACTCCATC  | TTCACTGATA | TCAAATCCGA | CCCAACGATT |
| 1561 | GATAGCGTGA  | AAAAGGGCGC | TAAAGAAATG  | CTGAACTTTG | AACCGGACAC | CATCATCAGC |
| 1621 | ATCGGTGGTG  | GCTCTCCTAT | GGATGCTGCG  | AAGGTCATGC | ACCTGCTGTA | CGAATACCCG |
| 1681 | GAAGCGGAAA  | TCGAAAACCT | GGTATCAAC   | TTCATGGACA | TCCGCAAACG | TATCTGCAAC |
| 1741 | TTCCCGAAGC  | TGGGCACTAA | AGCTATTTCC  | GTTGCCATCC | CGACTACCGC | GGGCACTGGT |
| 1801 | TCCGAAGCCA  | CGCCGTTTCG | CGTGATCACC  | AACGATGAAA | CCGGTATGAA | ATACCCGCTG |

|      |            |            |            |            |            |            |
|------|------------|------------|------------|------------|------------|------------|
| 1861 | ACCTCTTACG | AACTGACCCC | GAACATGGCA | ATTATCGACA | CCGAGCTGAT | GCTGAACATG |
| 1921 | CCGCCAAGC  | TGACCGCTGC | TACCGGCATC | GACGCTCTGG | TACATGCTAT | TGAGGCGTAC |
| 1981 | GTTTCCGTGA | TGGTACCGA  | TTACACCGAC | GAAGTGGCCC | TGCGTGCGAT | CAAAATGATT |
| 2041 | TTCAAGTACC | TGCTCGCGC  | TTACAAAAAC | GGCACGAATG | ACATCGAGGC | GCGTGAGAAA |
| 2101 | ATGGCCCATG | CAAGCAACAT | CGCGGGCATG | GCCTTCGCCA | ACGCGTTCCT | GGGCGTGTGC |
| 2161 | CACTCTATGG | CTCACAAACT | GGGTGCTATG | CACCACGTGC | CGCACGGTAT | CGCGTGTGCT |
| 2221 | GTCCTGATCG | AAGAAGTAAT | TAAGTACAAC | GCTACTGATT | GCCCAGCTAA | ACAGACCGCC |
| 2281 | TTCCACAGT  | ACAAATCTCC | TAACGCTAAA | CGTAAGTACG | CTGAGATCGC | CGAATACCTG |
| 2341 | AACCTGAAGG | GTACGAGCGA | CACTGAGAAA | GTTACTGCGC | TGATCGAAGC | TATCTCTAAA |
| 2401 | CTGAAAATTG | ACCTGTCCAT | CCCGCAGAAC | ATCAGCGCCG | CAGGCATCAA | CAAAAAGGAC |
| 2461 | TTTTACAACA | CGCTGGACAA | AATGAGCGAA | CTGGCTTTTG | ACGACCAGTG | CACCATGCA  |
| 2521 | AACCCGCGTT | ACCCGCTGAT | CTCTGAGCTG | AAAGACATTT | ATATCAAATC | TTTTTAA    |

**AdhE2.85 (77014)**

|      |            |            |             |            |            |             |
|------|------------|------------|-------------|------------|------------|-------------|
| 1    | ATGAAAGTGA | CGAACCAAAA | AGAAGTAAAA  | CAAAAAGTGA | ATGAAAGTGG | TGAGGCCCGAG |
| 61   | AAAAAGTTTC | CTAGTATAC  | CCAGGAGCAA  | GTTGACAAGA | TCTTCAAACA | GTGTGCCATT  |
| 121  | GCGGCTGCCA | AAGAGCGTAT | TAAGTGGCC   | AAAGTGGCGG | TGGAAGAAAC | CGGCATCGGT  |
| 181  | CTGGTCGAGG | ACAAGATTAT | CAAGAATCAC  | TTTGCCGCGG | AGTATATCTA | CAACAAATAC  |
| 241  | AAAAACGAAA | AGACTTGGCG | CATCATTGAT  | CATGATGACA | GCTTGGGTAT | CACGAAAGTC  |
| 301  | GCAGAACCAA | TCGGTATTGT | CGCGGCAATT  | GTCCCGACCA | CTAATCCGAC | CAGCACCGCG  |
| 361  | ATCTTCAAGA | GCTTGATCAG | CCTGAAAACC  | CGCAACGCGA | TTTTCTTCAG | CCCGCACCCG  |
| 421  | CGTGCGAAGA | AGAGCACCAT | CGCAGCGGCG  | AAGCTGATTT | TGGATGCCGC | GGTAAAGGCC  |
| 481  | GGTGACCCGA | AAAACATTAT | TGGCTGGGAT  | GACGAGCCGA | GCATTGAGCT | GTCTCAGGAC  |
| 541  | CTGATGAGCG | AAGCGGACAT | TATTCTGGCC  | ACCGGTGGTC | CGTCTATGGT | TAAGGCAGCG  |
| 601  | TACTCCAGCG | GTAAGCCTGC | TATCGGCGTT  | GGTGGGGGCA | ATACGCCGGC | TATCATCGAT  |
| 661  | GAAAGCGCGG | ATATTGATAT | GGCAGTTAGC  | TCCATCATTC | TGTCCAAAAC | CTACGACAAT  |
| 721  | GGTGTATCT  | GTGCAAGCGA | GCAAAGCATC  | CTGGTGATGA | ATAGCATTTA | CGAGAAGGTC  |
| 781  | AAAGAAGAGT | TTGTTAAGCG | TGGTTCCTAT  | ATTCTGAACC | AGCAGGAGAT | TGCAAAAATC  |
| 841  | AAAGAAACGA | TGTTTAAGAA | TGGCGCGATT  | AATGCAGATA | TGTTGGGTAA | GTCCGATAC   |
| 901  | ATTATCGCGA | AGATGGCGGG | TATCGAAGTG  | CCGCAAACCA | CCAAAATCTT | GATCGGCGAA  |
| 961  | GTGCAGAGCG | TGGAGAAGAG | CGAACTGTTC  | AGCAAAGAGA | AACTGAGCCC | GGTCTGGCT   |
| 1021 | ATGTACAAAG | TGAAGGACTT | TGACGAAGCC  | CTGAAGAAAG | CTCAGCGTCT | GATTGAGCTG  |
| 1081 | GGCGCAGCC  | ACCACACGAG | CAGCCTGTAT  | ATCGATAGCC | AAAACAATAA | GGACAAGGTG  |
| 1141 | AAAGAGTTCG | GTCTGCGTAT | GAAAACCTCT  | CGCTTCTTTA | TCAACATGCC | GAGCAGCCAA  |
| 1201 | GGTGCAGGCG | GCGATCTGTA | TAAGTTCGTA  | ATCGCGCCTT | CTTTTACGCT | GGGTGCGGT   |
| 1261 | ACCTGGGGCG | GTAATTCGGT | GAGCCAGAAT  | GTCGAGCCGA | AGCACCTGCT | GAACATCAAA  |
| 1321 | TCGGTCCGCG | AGCGCCGTGA | GAAGAGACCG  | TGGTTCAAAG | TCCCACAGAA | AATTTACTTC  |
| 1381 | AAATACGGCT | GCCTGCGTTT | CGCGCTGAAA  | GAAGTGAAG  | ACATGAACAA | AAAGCGTGCG  |
| 1441 | TTCATTGTTA | CCGACAAAGA | CCTGTTCAAA  | CTGGGTTACG | TGAACAAAAT | CACCAAAGTT  |
| 1501 | CTGGATGAAA | TTGACATCAA | GTAAGTCCATC | TTCAGTATA  | TCAAATCCGA | CCCAACGATT  |
| 1561 | GATAGCGTGA | AAAAGGGGCG | TAAAGAAATG  | CTGAAGTTTG | AACCGGACAC | CATCATCAGC  |
| 1621 | ATCGGTGGTG | GCTCTCCTAT | GGATGCTGCG  | AAGGTCATGC | ACCTGCTGTA | CGAATACCCG  |
| 1681 | GAAGCGGAAA | TCGAAAACCT | GGCTATCAAC  | TTCATGGACA | TCCGCAAACG | TATCTGCAAC  |
| 1741 | TTCCCGAAGC | TGGGCACTAA | AGCTATTTCC  | GTTGCCATCC | CGACTACCGC | GGGCACTGGT  |
| 1801 | TCCGAAGCCA | CGCCGTTTCG | CGTGATCACC  | AACGATGAAA | CCGGTATGAA | ATACCCGCTG  |
| 1861 | ACCTCTTACG | AACTGACCCC | GAACATGGCA  | ATTATCGACA | CCGAGCTGAT | GCTGAACATG  |
| 1921 | CCGCCAAGC  | TGACCGCTGC | TACCGGCATC  | GACGCTCTGG | TACATGCTAT | TGAGGCGTAC  |
| 1981 | GTTTCCGTGA | TGGTACCGA  | TTACACCGAC  | GAAGTGGCCC | TGCGTGCGAT | CAAAATGATT  |
| 2041 | TTCAAGTACC | TGCTCGCGC  | TTACAAAAAC  | GGCACGAATG | ACATCGAGGC | GCGTGAGAAA  |
| 2101 | ATGGCCCATG | CAAGCAACAT | CGCGGGCATG  | GCCTTCGCCA | ACGCGTTCCT | GGGCGTGTGC  |
| 2161 | CACTCTATGG | CTCACAAACT | GGGTGCTATG  | CACCACGTGC | CGCACGGTAT | CGCGTGTGCT  |
| 2221 | GTCCTGATCG | AAGAAGTAAT | TAAGTACAAC  | GCTACTGATT | GCCCAGCTAA | ACAGACCGCC  |
| 2281 | TTCCACAGT  | ACAAATCTCC | TAACGCTAAA  | CGTAAGTACG | CTGAGATCGC | CGAATACCTG  |
| 2341 | AACCTGAAGG | GTACGAGCGA | CACTGAGAAA  | GTTACTGCGC | TGATCGAAGC | TATCTCTAAA  |
| 2401 | CTGAAAATTG | ACCTGTCCAT | CCCGCAGAAC  | ATCAGCGCCG | CAGGCATCAA | CAAAAAGGAC  |
| 2461 | TTTTACAACA | CGCTGGACAA | AATGAGCGAA  | CTGGCTTTTG | ACGACCAGTG | CACCATGCA   |
| 2521 | AACCCGCGTT | ACCCGCTGAT | CTCTGAGCTG  | AAAGACATTT | ATATCAAATC | TTTTTAA     |

**AdhE2.86 (77015)**

|     |            |            |            |            |            |             |
|-----|------------|------------|------------|------------|------------|-------------|
| 1   | ATGAAAGTGA | CGAACCAAAA | AGAAGTAAAA | CAAAAAGTGA | ATGAAAGTGG | TGAGGCCCGAG |
| 61  | AAAAAGTTCA | ACACGTATAC | CCAGGAGCAA | GTTGACAAGA | TCTTCAAACA | GTGTGCCATT  |
| 121 | GCGGCTGCCA | AAGAGCGTAT | TAAGTGGCC  | AAAGTGGCGG | TGGAAGAAAC | CGGCATCGGT  |



|      |             |            |            |             |             |             |
|------|-------------|------------|------------|-------------|-------------|-------------|
| 181  | CTGGTCGAGG  | ACAAGATTAT | CAAGAATCAC | TTTGCCGCGG  | AGTATATCTA  | CAACAAATAC  |
| 241  | AAAAACGAAA  | AGACTTGCGG | CATCATTGAT | CATGATGACA  | GCTTGGGTAT  | CACGAAAGTC  |
| 301  | GCAGAACCAA  | TCGGTATTGT | CGCGGCAATT | GTCCCGACCA  | CTAATCCGAC  | CAGCACC CGG |
| 361  | ATCTTCAAGA  | GCTTGATCAG | CCTGAAAACC | CGCAACGCGA  | TTTTCTTCAG  | CCCGCACCCG  |
| 421  | CGTGCGAAGA  | AGAGCACCAT | CGCAGCGGCG | AAGCTGATTT  | TGGATGCCGC  | GGTTAAGGCC  |
| 481  | GGTGCACCGA  | AAAACATTAT | TGGCTGGATT | GACGAGCCGA  | GCATTGAGCT  | GTCTCAGGAC  |
| 541  | CTGATGAAAG  | AAGCGGACAT | TATTCTGGCC | ACCGGTGGTC  | CGTCTATGGT  | TAAGGCAGCG  |
| 601  | TACTCCAGCG  | GTAAGCCTGC | TATCGGCGTT | GGTGCGGGCA  | ATACGCCGGC  | TATCATCGAT  |
| 661  | GAAAGCGCGG  | ATATTGATAT | GGCAGTTAGC | TCCATCATTC  | TGTCCAAAAC  | CTACGACAAT  |
| 721  | GGTGTATCT   | GTGCAAGCGA | GCAAAGCATC | CTGGTGATGA  | ATAGCATTTA  | CGAGAAGGTC  |
| 781  | AAAGAAGAGT  | TTGTTAAGCG | TGGTTCCTAT | ATTCTGAACC  | AGAACGAGAT  | TGCAAAAATC  |
| 841  | AAAGAAACGA  | TGTTTAAGAA | TGGCGCGATT | AATGCAGATA  | TTGTTGGTAA  | GTCCGCATAC  |
| 901  | ATTATCGCGA  | AGATGGCGGG | TATCGAAGTG | CCGCAATTCA  | CCAAAATCTT  | GATCGGCGAA  |
| 961  | GTGCAGAGCG  | TGGAGAAGAG | CGAACTGTTC | AGCCATGAGA  | AACTGAGCCC  | GGTTCTGGCT  |
| 1021 | ATGTACAAAG  | TGAAGGACTT | TGACGAAGCC | CTGAAGAAAAG | CTCAGCGTCT  | GATTAACCTG  |
| 1081 | GGCGGCAGCG  | GTACACAGAG | CAGCCTGTAT | AGCGATAGCC  | AAAACAATAA  | GGACAAGGTG  |
| 1141 | AAAGAGTTCG  | GTCTGGCGAT | GAAAACCTCT | CGCACGTTTA  | TCAACATGCC  | GAGCAGCCAA  |
| 1201 | GGTGGGAGCG  | GCGATCTGTA | TAACCTCGCA | ATCGCGCCTT  | CTTTTACGCT  | GGTTGCGGT   |
| 1261 | ACCTGGGGCG  | GTAATTCGGT | GAGCCAGAAT | GTCGAGCCGA  | AGCACCTGCT  | GAACATCAAA  |
| 1321 | TCGGTCCGCG  | AGCGCCGTGA | GAAGAGACCG | TGGTTCAAAG  | TCCCACAGAA  | AATTTACTTC  |
| 1381 | AAATACGGCT  | GCCTGCGTTT | CGCGTGAAA  | GAAGTGAAG   | ACATGAACAA  | AAAGCGTGCG  |
| 1441 | TTCATGTGTTA | CCGACAAAGA | CCTGTTCAAA | CTGGGTTACG  | TGAACAAAAT  | CACCAAAGTT  |
| 1501 | CTGGATGAAA  | TTGACATCAA | GTAATCCATC | TTCATGATA   | TCAAATCCGA  | CCCAACGATT  |
| 1561 | GATAGCGTGA  | AAAAGGGCGC | TAAAGAAATG | CTGAACCTTG  | AACCGGACAC  | CATCATCAGC  |
| 1621 | ATCGGTGGTG  | GCTCTCCTAT | GGATGCTGCG | AAGGTCATGC  | ACCTGCTGTA  | CGAATACCCG  |
| 1681 | GAAGCGGAAA  | TCGAAAACCT | GGCTATCAAC | TTCATGGACA  | TCCGCAAACG  | TATCTGCAAC  |
| 1741 | TTCCCGAAGC  | TGGGCACTAA | AGCTATTTCC | GTTGCCATCC  | CGACTACCGC  | GGGCACTGGT  |
| 1801 | TCCGAAAGCA  | CGCGTTCGCG | CGTATCACC  | AACGATGAAA  | CCGGTATGAA  | ATACCCGCTG  |
| 1861 | ACCTTTACG   | AACTGACCCC | GAACATGGCA | ATTATCGACA  | CCGAGCTGAT  | GCTGAACATG  |
| 1921 | CCGCGCAAGC  | TGACCGCTGC | TACCGGCATC | GACGCTCTGG  | TACATGCTAT  | TGAGGCGTAT  |
| 1981 | TTTTCCGTGA  | TGGCTACCGA | TTACACCGAC | GAAGTGGCCC  | TGCGTGCGAT  | CAAAATGATT  |
| 2041 | TTCAAGTACC  | TGCCTCGCGC | TTACAAAAAC | GGCACGAATG  | ACATCGAGGC  | CGGTGAGAAA  |
| 2101 | ATGGCCCATG  | CAAGCAACAT | CGCGGGCATG | GCCTTCGCCA  | ACGCGTTCCCT | GGGCGTGTGC  |
| 2161 | CACTCTATGG  | CTCACAAACT | GGGTGCTATG | CACCACGTGC  | CGCACGGTAT  | CGCGTGTGCT  |
| 2221 | GTCTTGATCG  | AAGAAGTAAT | TAAGTACAAC | GCTACTGATT  | GCCCAGACTAA | ACAGACCGCC  |
| 2281 | TTCCACAGT   | ACAAATCTCC | TAACGCTAAA | CGTAAGTACG  | CTGAGATCGC  | CGAATACCTG  |
| 2341 | AACCTGAAGG  | GTACGAGCGA | CACTGAGAAA | GTTACTGCGC  | TGATCGAAGC  | TATCTCTAAA  |
| 2401 | CTGAAAATTG  | ACCTGTCCAT | CCGCGAAGAA | ATCAGCGCCG  | CAGGCATCAA  | CAAAAAGTAC  |
| 2461 | TTTTACAACA  | CGCTGGACAA | AATGAGCGAA | CTGGCTTTTTG | ACGACCAGTG  | CACCACTGCA  |
| 2521 | AACCCGCGTT  | ACCCGCTGAT | CTCTGAGCTG | AAAGACATTT  | ATATCAAATC  | TTTTTAA     |

**AdhE2.87 (77016)**

|      |            |            |            |             |            |             |
|------|------------|------------|------------|-------------|------------|-------------|
| 1    | ATGAAAGTGA | CGAACCAAAA | AGAAGTAAA  | CAAAAAGACA  | ATGAACTGCG | TGAGGCCCG   |
| 61   | AAAAAGTTCG | CTACGTGCAC | CCAGGACCAA | GTTGACAAGA  | TCTTCAAACA | GTGTGCCATT  |
| 121  | GCGGCTGCCA | AAGAGCGTAT | TAACCTGGCC | AAACTGGCGG  | TGGAAGAAAC | CGGCATCGGT  |
| 181  | CTGGTCGAGG | ACAAGATTAT | CAAGAATCAC | TTTGCCGCGG  | AGTATATCTA | CAACAAATAC  |
| 241  | AAAAACGAAA | AGACTTGCGG | CATCATTGAT | CATGATGACA  | GCTTGGGTAT | CACGAAAGTC  |
| 301  | GCAGAACCAA | TCGGTATTGT | CGCGGCAATT | GTCCCGACCA  | CTAATCCGAC | CAGCACC CGG |
| 361  | ATCTTCAAGA | GCTTGATCAG | CCTGAAAACC | CGCAACGCGA  | TTTTCTTCAG | CCCGCACCCG  |
| 421  | CGTGCGAAGA | AGAGCACCAT | CGCAGCGGCG | AAGCTGATTT  | TGGATGCCGC | GGTTAAGGCC  |
| 481  | GGTGCACCGA | AAAACATTAT | TGGCTGGATT | GACGAGCCGA  | GCATTGAGCT | GTCTCAGGAC  |
| 541  | CTGATGAGCG | AAGCGGACAT | TATTCTGGCC | ACCGGTGGTC  | CGTCTATGGT | TAAGGCAGCG  |
| 601  | TACTCCAGCG | GTAAGCCTGC | TATCGGCGTT | GGTGCGGGCA  | ATACGCCGGC | TATCATCGAT  |
| 661  | GAAAGCGCGG | ATATTGATAT | GGCAGTTAGC | TCCATCATTC  | TGGGTAAAAC | CTACGACAAT  |
| 721  | GGTGTATCT  | GTGCAAGCGA | GCAAAGCATC | CTGGTGATGA  | ATAGCATTTA | CGAGAAGGTC  |
| 781  | AAAGAAGAGT | TTGTTAAGCG | TGGTTCCTAT | ATTCTGAACC  | AGAACGAGAT | TGCAAAAATC  |
| 841  | AAAGAAACGA | TGTTTAAGAA | TGGCGCGATT | AATGCAGATA  | TTGTTGGTAA | GTCCGCATAC  |
| 901  | ATTATCGCGA | AGATGGCGGG | TATCGAAGTG | CCGCAAACCA  | CCAAAATCTT | GATCGGCGAA  |
| 961  | GTGCAGAGCG | TGGAGAAGAG | CGAACTGTTC | AGCAAAGAGA  | AACTGAGCCC | GGTTCTGGCT  |
| 1021 | ATGTACAAAG | TGAAGGACTT | TGACGAAGCC | CTGAAGAAAAG | CTCAGCGTCT | GATTGAGCTG  |
| 1081 | GGCGGCAGCG | GTACACAGAG | CAGCCTGTAT | ATCGATAGCC  | AAAACAATAA | GGACAAGGTG  |
| 1141 | AAAGAGTTCG | GTCTGGCGAT | GAAAACCTCT | CGCACGTTTA  | TCAACATGCC | GAGCAGCCAA  |

1201 GGTGCGAGCG GCGATCTGTA TAACTTCGCA ATCGCGCCTT CTTTTACGCT GGGTTGCGGT  
1261 ACCTGGGGCG GTAATTCGGT GAGCCAGAAT GTCGAGCCGA AGCACCTGCT GAACATCAAA  
1321 TCGGTGCGCG AGCGCCGTGA GAAGAGACCG TGGTTCAAAG TCCCACAGAA AATTTACTTC  
1381 AAATACGGCT GCCTGCGTTT CGCGTGAAA GAACTGAAAG ACATGAACAA AAAGCGTGCG  
1441 TTCATTGTTA CCGACAAAGA CCTGTTCAAA CTGGGTTACG TGAACAAAAT CACCAAAGTT  
1501 CTGGATGAAA TTGACATCAA GTACTCCATC TTCACTGATA TCAAATCCGA CCCAACGATT  
1561 GATAGCGTGA AAAAGGGCGC TAAAGAAATG CTGAACTTTG AACCGGACAC CATCATCAGC  
1621 ATCGGTGGTG GCTCTCCTAT GGATGCTGCG AAGGTCATGC ACCTGCTGTA CGAATACCCG  
1681 GAAGCGGAAA TCGAAAACCT GGCTATCAAC TTCATGGACA TCCGCAAACG TATCTGCAAC  
1741 TTCCCGAAGC TGGGCACTAA AGCTATTTCC GTTGCCATCC CGACTACCGC GGGCACCCTGT  
1801 TCCGAAGCCA CCGGTTTCGC CGTGATCACC AACGATGAAA CCGGTATGAA ATACCCTGGT  
1861 ACCTCTTACG AACTGACCCC GAACATGGCA ATTATCGACA CCGAGCTGAT GCTGAACATG  
1921 CCGCGCAAGC TGACCGCTGC TACCGGCATC GACGCTCTGG TACATGCTAT TGAGGCGTAC  
1981 GTTTCGCTGA TGGTACCCTA TTACACCGAC GAACTGGCCC TCGGTGCGAT CAAAATGATT  
2041 TTCAAGTACC TGCTCGCGC TTACAAAAAC GGCACGAATG ACATCGAGGC GCGTGAGAAA  
2101 ATGGCCCATG CAAGCAACAT CGCGGGCATG GCCTTCGCCA ACGCGTTCCCT GGGCGTGTGC  
2161 CACTCTATGG CTCACAAACT GGGTGCTATG CACCACGTGC CGCACGGTAT CGCGTGTGCT  
2221 GTCCTGATCG AAGAGTAAT TAAGTACAAC GCTACTGATT GCCCGACTAA ACAGACCCGC  
2281 TTCCACAGT ACAATCTCC TAACGCTAAA CGTAAGTACG CTGAGATCGC CGAATACCTG  
2341 AACCTGAAGG GTACGAGCGA CACTGAGAAA GTTACTGCGC TGATCGAAGC TATCTCTAAA  
2401 CTGAAAATTG ACCTGTCCAT CCCGAGAAC ATCAGCGCCG CAGGCATCAA CAAAAGGAC  
2461 TTTTACAACA CGCTGGACAA AATGAGCGAA CTGGCTTTTG ACGACCAGTG CACCACTGCA  
2521 AACCCGCGTT ACCCGCTGAT CTCTGAGCTG AAAGACATTT ATATCAAATC TTTTAA

**AdhE2.88 (77017)**

1 ATGAAAGTGA CGAACCAAAA AGAACTGAAA CAAAACTGA ATGAACTGCG TGAGGCCAG  
61 AAAAAGTTCA ACACGTATAC CCAGGAGCAA GTTGACAAGA TCTTCAAACA GTGTGCCATT  
121 GCGGTGCCA AAGAGCGTAT TAACTTGGCC AAAGTGGCGG TGAAGAAAAC CGGCATCGGT  
181 CTGGTCGAGG ACAAGATTAT CAAGAATCAC TTTGCCGCGG AGTATATCTA CAACAAAGAG  
241 AAAAAACGAAA AGACTTGGCG CATCATTGAT CATGATGACA GCTTGGGTAT CACGAAAGTC  
301 GCAGAACCAA TCGGTATTGT CGCGAGCATT GTCCGACCA CTAATCCGAC CAGCACCGCG  
361 ATCTTCAAGA GCTTGATCAG CCTGGCGACC CGCAACGCGA TTTTCTTCAG CCCGCACCCG  
421 CGTGCGAAGA AGAGCACCAT CGCAGCGGCG AAGCTGATTT TGGATGCCCG GGTAAAGGCC  
481 GGTGCACCGA AAAACATTAT TGGCTGGATT GACGAGCCGA GCATTGAGCT GTCTCAGGAC  
541 CTGATGAGCG AAGCGGACAT TATTCTGGCC ACCGGTGGTC CGTCTATGGT TAAGGCAGCG  
601 TACTCCAGCG GTAAGCCTGC TATCGCGGTT GGTGCGGGCA ATACGCCGCG TATCATCGAT  
661 GAAAGCGCGG ATATTGATAT GGCAGTTAGC TCCATCATTC TGTCCAAAAC CTACGACAAT  
721 GGTGTTATCT GTGCAAGCGA GCAAAGCATC CTGGTGATGA ATAGCATTTA CGAGAAGGTC  
781 AAAGAAGAGT TTGTTAAGCG TGGTTCCTAT ATTCTGAACC AGGAGGAGAT TGCAAAAATC  
841 AAAGAAACGA TGTTTAAGAA TGGCGCGATT AATGCAGATA TTGTTGGTAA GTCCGCATAC  
901 ATTATCGCGA AGATGGCGGG TATCGAAGTG CCGCAAACCA CCAAATCTT GATCGGCGAA  
961 TTGCAGAGCG TGGAGAAGAG CGAACTGTTC AGCCATGAGA AACTGAGCCC GGTTCCTGGCT  
1021 ATGTACAAAG TGAAGGACTT TGACGAAGCC CTGAAGAAAAG CTCAGCGTCT GATTGAGCTG  
1081 GCGGCAGCG GTCACACGAG CAGCCTGTAT ATCGATAGCC AAAACAATAA GGACAAGGTG  
1141 AAAGAGTTCT GTCTGGCGAT GAAAACCTCT CGCACGTTTA TCAACATGCC GAGCAGCCAA  
1201 GGTGCGAGCG GCGATCTGTA TAACTTCGCA ATCGCGCCTT CTTTTACGCT GGGTTGCGGT  
1261 ACCTGGGGCG GTAATTCGGT GAGCCAGAAT GTCGAGCCGA AGCACCTGCT GAACATCAAA  
1321 TCGGTGCGCG AGCGCCGTGA GAAGAGACCG TGGTTCAAAG TCCCACAGAA AATTTACTTC  
1381 AAATACGGCT GCCTGCGTTT CGCGTGAAA GAACTGAAAG ACATGAACAA AAAGCGTGCG  
1441 TTCATTGTTA CCGACAAAGA CCTGTTCAAA CTGGGTTACG TGAACAAAAT CACCAAAGTT  
1501 CTGGATGAAA TTGACATCAA GTACTCCATC TTCACTGATA TCAAATCCGA CCCAACGATT  
1561 GATAGCGTGA AAAAGGGCGC TAAAGAAATG CTGAACTTTG AACCGGACAC CATCATCAGC  
1621 ATCGGTGGTG GCTCTCCTAT GGATGCTGCG AAGGTCATGC ACCTGCTGTA CGAATACCCG  
1681 GAAGCGGAAA TCGAAAACCT GGCTATCAAC TTCATGGACA TCCGCAAACG TATCTGCAAC  
1741 TTCCCGAAGC TGGGCACTAA AGCTATTTCC GTTGCCATCC CGACTACCGC GGGCACCCTGT  
1801 TCCGAAGCCA CCGGTTTCGC CGTGATCACC AACGATGAAA CCGGTATGAA ATACCCTGCTG  
1861 ACCTCTTACG AACTGACCCC GAACATGGCA ATTATCGACA CCGAGCTGAT GCTGAACATG  
1921 CCGCGCAAGC TGACCGCTGC TACCGGCATC GACGCTCTGG TACATGCTAT TGAGGCGTAC  
1981 GTTTCGCTGA TGGTACCCTA TTACACCGAC GAACTGGCCC TCGGTGCGAT CAAAATGATT  
2041 TTCAAGTACC TGCTCGCGC TTACAAAAAC GGCACGAATG ACATCGAGGC GCGTGAGAAA  
2101 ATGGCCCATG CAAGCAACAT CGCGGGCATG GCCTTCGCCA ACGCGTTCCCT GGGCGTGTGC  
2161 CACTCTATGG CTCACAAACT GGGTGCTATG CACCACGTGC CGCACGGTAT CGCGTGTGCT

|      |            |            |            |            |            |            |
|------|------------|------------|------------|------------|------------|------------|
| 2221 | GTCCTGATCG | AGAAGTAAT  | TAAGTACAAC | GCTACTGATT | GCCCCACTAA | ACAGACCGCC |
| 2281 | TTCCACAGT  | ACAAATCTCC | TAACGCTAAA | CGTAAGTACG | CTGAGATCGC | CGAATACCTG |
| 2341 | AACCTGAAGG | GTACGAGCGA | CACTGAGAAA | GTTACTGCGC | TGATCGAAGC | TATCTCTAAA |
| 2401 | CTGAAAATTG | ACCTGTCCAT | CCCCGAGAAC | ATCAGCGCCG | CAGGCATCAA | CAAAAAGGAC |
| 2461 | TTTTACAACA | CGCTGGACAA | AATGAGCGAA | CTGGCTTTTG | ACGACCAGTG | CACCACTGCA |
| 2521 | AACCCGCGTT | ACCCGCTGAT | CTCTGAGCTG | AAAGACATTT | ATATCAAATC | TTTTTAA    |

**AdhE2.89 (77018)**

|      |             |            |            |            |             |            |
|------|-------------|------------|------------|------------|-------------|------------|
| 1    | ATGAAAGTGA  | CGAACCAAAA | AGAAGTAAA  | CAAAAAGTGA | ATGAACTGCG  | TGAGGCCAG  |
| 61   | AAAAAGTTCG  | CTAGCTATAC | CCAGGAGCAA | GTTGACAAGA | TCTTCAAACA  | GTGTGCCATT |
| 121  | GCGGCTGCCA  | AAGAGCGTAT | TAAGTGGCC  | GAGCTGGCGG | TGGAAGAAAC  | CGGCATCGGT |
| 181  | CTGGTCGAGG  | ACAAGATTAT | CAAGAATCAC | TTTGCCGCGG | AGTATATCTA  | CAACAAAGAG |
| 241  | AAAAACGAAA  | AGACTTGCGG | CATCATTGAT | CATGATGACA | GCTTGGGTAT  | CACGAAAGTC |
| 301  | GCAGAACCAA  | TCGGTATTGT | CGCGGCAATT | GTCCCGACCA | CTAATCCGAC  | CAGCACCCCG |
| 361  | ATCTCAAGA   | GCTTGATCAG | CCTGAAAACC | CGCAACGCGA | TTTTCTTCAG  | CCCGCACCCG |
| 421  | CGTGCGAAGA  | AGAGCACCAT | CGCAGCGCGG | AAGCTGATTT | TGGATGCCGC  | GGTTAAGGCC |
| 481  | GGTGCACCGA  | AAAACATTAT | TGGCTGGATT | GACGAGCCGA | GCATTGAGCT  | GTCTCAGGAC |
| 541  | CTGATGAGCG  | AAGCGGACAT | TATCTGGCC  | ACCGGTGGTC | CGTCTATGGT  | TAAGGCAGCG |
| 601  | TACTCCAGCG  | GTAAGCCTGC | TATCGGCGTT | GGTGCGGGCA | ATACGCCGGC  | TATCATCGAT |
| 661  | GAAAGCGCGG  | ATATTGATAT | GGCAGTTAGC | TCCATCATTC | TGTCCAAAAC  | CTACGACAAT |
| 721  | GGTGTATCT   | GTGCAAGCGA | GCAAAGCATC | CTGGTGATGA | ATAGCATTTA  | CGAGAAGGTC |
| 781  | AAAGAAGAGT  | TTGTTAAGCG | TGGTTCCTAT | ATCTGAACC  | AGAACGAGAT  | TGCAAAAATC |
| 841  | AAAGAAACGA  | TGTTAAGAA  | TGGCGCGATT | AATGCAGATA | TTGTTGGTAA  | GTCCGCATAC |
| 901  | ATTATCGCGA  | AGATGGCGGG | TATCGAAGTG | CCGCAATTCA | CCAAAATCTT  | GATCGGCGAA |
| 961  | GTGCAGAGCG  | TGGAGAAGAG | CGAACTGTTC | AGCCATGAGA | AACTGAGCCC  | GGTTCTGGCT |
| 1021 | ATGTACAAAG  | TGAAGGACTT | TGACGAAGCC | CTGAAGAAAG | CTCAGCGTCT  | GATTGAGCTG |
| 1081 | GGCGGCAGCG  | GTACACGAG  | CAGCCTGTAT | ATCGATAGCC | AAAACAATAA  | GGACAAGGTG |
| 1141 | AAAGAGTTCG  | GTCTGGAGAT | AAAAACCTCT | CGCACGTTTA | TCAACATGCC  | GAGCAGCCAA |
| 1201 | GGTGGCAGCG  | CGCATCTGTA | TAAGTTCGCA | ATCGCGCCTT | CTTTTACGCT  | GGGTTGCGGT |
| 1261 | ACCTGGGGCG  | GTAATTCGGT | GAGCCAGAAT | GTCGAGCCGA | AGCACCTGCT  | GAACATCAAA |
| 1321 | TCGGTCGCGG  | AGCGCCGTGA | GAAGAGACCG | TGGTTCAAAG | TCCCACAGAA  | AATTTACTTC |
| 1381 | AAATACGGCT  | GCCTGCGTTT | CGCGCTGAAA | GAAGTAAAG  | ACATGAACAA  | AAAGCGTGCG |
| 1441 | TTCAATTGTTA | CCGACAAAAG | CCTGTTCAAA | CTGGGTTACG | TGAACAAAAT  | CACCAAAGTT |
| 1501 | CTGGATGAAA  | TTGACATCAA | GTACTCCATC | TTCATGATA  | TCAAATCCGA  | CCCAACGATT |
| 1561 | GATAGCGTGA  | AAAAGGGCGC | TAAAGAAATG | CTGAACTTTG | AACCGGACAC  | CATCATCAGC |
| 1621 | ATCGGTGGTG  | GCTCTCCTAT | GGATGCTGCG | AAGGTCATGC | ACCTGCTGTA  | CGAATACCCG |
| 1681 | GAAGCGGAAA  | TCGAAAACCT | GGCTATCAAC | TTCATGGACA | TCCGCAAACG  | TATCTGCAAC |
| 1741 | TTCCCGAAGC  | TGGGCACTAA | AGCTATTTCC | GTTGCCATCC | CGACTACCGC  | GGGCACTGGT |
| 1801 | TCCGAAGCCA  | CGCCGTTCGC | CGTGATCACC | AACGATGAAA | CCGGTATGAA  | ATACCCGCTG |
| 1861 | ACCTCTTACG  | AACTGACCCC | GAACATGGCA | ATTATCGACA | CCGAGCTGAT  | GCTGAACATG |
| 1921 | CCGCGCAAGC  | TGACCGCTGC | TACCGGCATC | GACGCTCTGG | TACATGCTAT  | TGAGGCGTAC |
| 1981 | GTTTCCGTGA  | TGGTACCGA  | TTACACCGAC | GAAGTGGCCC | TGCGTGCAT   | CAAAATGATT |
| 2041 | TTCAAGTACC  | TGCCTCGCGC | TTACAAAAC  | GGCACGAATG | ACATCGAGGC  | GCGTGAGAAA |
| 2101 | ATGGCCATG   | CAAGCAACAT | CGCGGGCATG | GCCTTCGCCA | ACGCGTTCCCT | GGGCGTGTGC |
| 2161 | CACTCTATGG  | CTCACAAACT | GGTGCTATG  | CACCACGTGC | CGCACGGTAT  | CGCGTGTGCT |
| 2221 | GTCCTGATCG  | AGAAGTAAT  | TAAGTACAAC | GCTACTGATT | GCCCCACTAA  | ACAGACCGCC |
| 2281 | TTCCACAGT   | ACAAATCTCC | TAACGCTAAA | CGTAAGTACG | CTGAGATCGC  | CGAATACCTG |
| 2341 | AACCTGAAGG  | GTACGAGCGA | CACTGAGAAA | GTTACTGCGC | TGATCGAAGC  | TATCTCTAAA |
| 2401 | CTGAAAATTG  | ACCTGTCCAT | CCCCGAGAAC | ATCAGCGCCG | CAGGCATCAA  | CAAAAAGGAC |
| 2461 | TTTTACAACA  | CGCTGGACAA | AATGAGCGAA | CTGGCTTTTG | ACGACCAGTG  | CACCACTGCA |
| 2521 | AACCCGCGTT  | ACCCGCTGAT | CTCTGAGCTG | AAAGACATTT | ATATCAAATC  | TTTTTAA    |

**AdhE2.90 (77019)**

|     |            |            |            |            |            |            |
|-----|------------|------------|------------|------------|------------|------------|
| 1   | ATGAAAGTGA | CGAACCAAAA | AGAAGTAAA  | CAAAAAGTGA | ATGAACTGCG | TGAGGCCAG  |
| 61  | AAAAAGTTCG | CTACGTATAC | CCAGGAGCAA | GTTGACAAGA | TCTTCAAACA | GTGTGCCATT |
| 121 | GCGGCTGCCA | AACTGCGTAT | TAAGTGGCC  | CGTCTGGCGG | TGGAAGAAAC | CGGCATCGGT |
| 181 | CTGGTCGAGG | ACAAGATTAT | CAAGAATCAC | TTTGCCGCGG | AGTATATCTA | CAACAAATAC |
| 241 | AAAAACGAAA | AGACTTGCGG | CATCATTGAT | CATGATGACA | GCTTGGGTAT | CACGAAAGTC |
| 301 | GCAGAACCAA | TCGGTATTGT | CGCGGCAATT | GTCCCGACCA | CTAATCCGAC | CAGCACCCCG |
| 361 | ATCTCAAGA  | GCTTGATCAG | CCTGAAAACC | CGCAACGCGA | TTTTCTTCAG | CCCGCACCCG |
| 421 | CGTGCGAAGA | AGAGCACCAT | CGCAGCGCGG | AAGCTGATTT | TGGATGCCGC | GGTTAAGGCC |
| 481 | GGTGCACCGA | AAAACATTAT | TGGCTGGATT | GACGAGCCGA | GCATTGAGCT | GTCTCAGGAC |

541 ATGATGAGCG AAGCGGACAT TATTCTGGCC ACCGGTGGTC CGTCTATGGT TAAGGCAGCG  
601 TACTCCAGCG GTAAGCCTGC TATCGGCGTT GGTGCGGGCA ATACGCCGGC TATCATCGAT  
661 GAAAGCGCGG ATATTGATAT GGCAGTTAGC TCCATCATTG TGTCCGCGAC CTACGACAAT  
721 GGTGTTATCT TTGCAAGCGA GCAAAGCATC CTGGTGTATGA ATAGCATTTA CGAGAAGGTC  
781 AAAGAAGAGT TTGTTAAGCG TGGTTCCTAT ATTCTGAACC AGAACGAGAT TGCAAAAATC  
841 AAAGAAACGA TGTTAAGAA TGGCGCGATT AATGCAGATA TTGTTGGTAA GTCCGCATAC  
901 ATTATCGCGA AGATGGCGGG TATCGAAGTG CCGCAAACCA CCAAATCTTT GATCGGCGAA  
961 GTGCAGAGCG TGGAGAAGAG CGAACTGTTC AGCCATGAGA AACTGAGCCC GGTTCCTGGCT  
1021 ATGTACAAAG TGAAGGACTT TGACGAAGCC CTGAAGAAAG CTCAGCGTCT GATTGAGCTG  
1081 GGCGGCAGCG GTCACACGAG CAGCCTGTAT ATCGATAGCC AAAACAATAA GGACAAGGTG  
1141 AAAGAGTTTC GTCTGGCGAT GAAAACCTCT CGCAGCTTTA TCAACATGCC GAGCAGCCAA  
1201 GGTGCGAGCG GCGATCTGTA TAACTTCGCA ATCGCGCCTT CTTTTACGCT GGGTTGCGGT  
1261 ACCTGGGGCG GTAATTTCGGT GAGCCAGAAT GTCGAGCCGA AGCACCTGCT GAACATCGTT  
1321 TCGGTGCGCG AGCGCCGTGA GAAGAGACCG TGTTCAAAG TCCCACAGAA AATTTACTTC  
1381 AAATACGGCT GCCTGCGTTT CGCGCTGAAA GAACTGAAAG ACATGAACAA AAAGCGTGCG  
1441 TTCATTGTTA CCGACAAAGA CCTGTTCAAA CTGGGTTACG TGAACAAAAT CACCAAAGTT  
1501 CTGGATGAAA TTGACATCAA GTACTCCATC TTCACTGATA TCAAATCCGA CCCAACGATT  
1561 GATAGCGTGA AAAAGGGCGC TAAAGAAATG CTGAACTTTG AACCGGACAC CATCAATCAGC  
1621 ATCGGTGGTG GCTCTCCTAT GGATGCTGCG AAGGTCATGC ACCTGCTGTA CGAATACCCG  
1681 GAAGCGGAAA TCGAAAACCT GGCTATCAAC TTCATGGACA TCCGAAAACG TATCTGCAAC  
1741 TTCCCGAAGC TGGGCACTAA AGCTATTTCC GTTGCCATCC CGACTACCGC GGGCACTGGT  
1801 TCCGAAGCCA CGCCGTTTCG CGTGATCACC AACGATGAAA CCGGTATGAA ATACCCGCTG  
1861 ACCTCTTACG AACTGACCCC GAACATGGCA ATTATCGACA CCGAGCTGAT GCTGAACATG  
1921 CCGCGCAAGC TGACCGCTGC TACCGGCATC GACGCTCTGG TACATGCTAT TGAGGCGTAC  
1981 GTTTCCGTGA TGGCTACCGA TTACACCGAC GAACTGGCCC TCGGTGCGAT CAAAATGATT  
2041 TTCAAGTACC TGCTCGCGC TTACAAAAAC GGCACGAATG ACATCGAGGC GCGTGAGAAA  
2101 ATGGCCATG CAAGCAACAT CGCGGGCATG GCCTTCGCCA ACGCGTTTCT GGGCGTGTGC  
2161 CACTCTATGG CTCACAAACT GGTGCTATG CACCACGTGC CGCACGGTAT CGCGTGTGCT  
2221 GTCCTGATCG AAGAAGTAAT TAAGTACAAC GCTACTGATT GCCCGACTAA ACAGACCGCC  
2281 TTCCACAGT ACAAATCTCC TAACGTAAA CGTAAGTACG CTGAGATCGC CGAATACCTG  
2341 AACCTGAAGG GTACGAGCGA CACTGAGAAA GTTACTGCGC TGATCGAAGC TATCTCTAAA  
2401 CTGAAAATTG ACCTGTCCAT CCCGCAAGAC ATCAGCGCCG CAGGCATCAA CAAAAAGGAC  
2461 TTTTACAACA CGCTGGACAA AATGAGCGAA CTGGCTTTTG ACGACCAGTG CACCACTGCA  
2521 AACCCGCGTT ACCCGCTGAT CTCTGAGCTG AAAGACATTT ATATCAAATC TTTTTAA

**AdhE2.91 (77020)**

1 ATGAAAGTGA CGAACCAAAA AGAACTGAAA CAAAAACTGA ATGAACTGCG TGAGGCCAG  
61 AAAAAGTTTC CTACGTGCAC CCAGGAGCAA GTTGACAAGT TCTTCAAACA GTGTGCCATT  
121 GCGGTGCGCA AAGAGCGTAT TAACTTGGCC AAAGTGGCGG TGAAGAAAC CGGCATCGGT  
181 CTGGTGCAGG ACAAGATTAT CAAGAATCAC TTTGCCGCGG AGTATATCTA CAACAAATC  
241 AAAAACGAAA AGACTTGCAG CATCATTGAT CATGATGACA GCTTGGGTAT CACGAAAGTC  
301 GCAGAACCAA TCGTATTGT CGCGGCAATT GTCCCGACCA CTAATCCGAC CAGCACCGCG  
361 ATCTTCAAGA GCTTGATCAG CCTGGCGACC CGCAACGCGA TTTTCTTCAG CCCGCACCCG  
421 CGTGCGAAGA AGAGCACCAT CGCAGCGGCG AAGCTGATTT TGGATGCCGC GGTTAAGGCC  
481 GGTGCACCGA AAAACATTAT TGGCTGGATT GACGAGCCGA GCATTGAGCT GTCTCAGGAC  
541 CTGATGAGCG AAGCGGACAT TATTCTGGCC ACCGGTGGTC CGTCTATGGT TAAGGCAGCG  
601 TACTCCAGCG GTAAGCCTGC TATCGGCGTT GGTGCGGGCA ATACGCCGGC TATCATCGAT  
661 GAAAGCGCGG ATATTGATAT GGCAGTTAGC TCCATCATTG TGTCCAAAAC CTACGACAAT  
721 GGTGTTATCT GTGCAAGCGA GCAAAGCATC CTGGTGTATGA ATAGCATTTA CGAGAAGGTC  
781 AAAGAAGAGT TTGTTAAGCG TGGTTCCTAT ATTCTGAACC AGAACGAGAT TGCAAAAATC  
841 AAAGAAACGA TGTTAAGAA TGGCGCGATT AATGCAGATA TTGTTGGTAA GTCCGCATAC  
901 ATTATCGCGA AGATGGCGGG TATCGAAGTG CCGCAAACCA CCAAATCTTT GATCGGCGAA  
961 GTGCAGGACG TGGAGAAGAG CGAACTGTTC AGCCATGAGA AACTGAGCCC GGTTCCTGGCT  
1021 ATGTACAAAG TGAAGGACTT TGACGAAGCC CTGAAGCTGG CTCAGCGTCT GATTGAGCTG  
1081 GGCGGCAGCG GTCACACGAG CAGCCTGTAT ATCGATAGCC AAAACAATAA GGACAAGGTG  
1141 AAAGAGTTTC GTCTGGCGAT GAAAACCTCT CGCAGCTTTA TCAACATGCC GAGCAGCCAA  
1201 GGTGCGAGCG GCGATCTGTA TAACTTCGCA ATCGCGCCTT CTTTTACGCT GGGTTGCGGT  
1261 ACCTGGGGCG GTAATTTCGGT GAGCCAGAAT GTCGAGCCGA AGCACCTGCT GAACATCAAA  
1321 TCGGTGCGCG AGCGCCGTGA GAAGAGACCG TGTTCAAAG TCCCACAGAA AATTTACTTC  
1381 AAATACGGCT GCCTGCGTTT CGCGCTGAAA GAACTGAAAG ACATGAACAA AAAGCGTGCG  
1441 TTCATTGTTA CCGACAAAGA CCTGTTCAAA CTGGGTTACG TGAACAAAAT CACCAAAGTT  
1501 CTGGATGAAA TTGACATCAA GTACTCCATC TTCACTGATA TCAAATCCGA CCCAACGATT

|      |            |            |            |            |             |             |
|------|------------|------------|------------|------------|-------------|-------------|
| 1561 | GATAGCGTGA | AAAAGGGCGC | TAAAGAAATG | CTGAACTTTG | AACCGGACAC  | CATCATCAGC  |
| 1621 | ATCGGTGGTG | GCTCTCCTAT | GGATGCTGCG | AAGGTCATGC | ACCTGCTGTA  | CGAATACCCG  |
| 1681 | GAAGCGGAAA | TCGAAAACCT | GGCTATCAAC | TTCATGGACA | TCCGCAAACG  | TATCTGCAAC  |
| 1741 | TTCCCGAAGC | TGGGCACTAA | AGCTATTTCC | GTTGCCATCC | CGACTACCGC  | GGGCACTGGT  |
| 1801 | TCCGAAGCCA | CGCCGTTCGC | CGTGATCACC | AACGATGAAA | CCGGTATGAA  | ATACCCGCTG  |
| 1861 | ACCTCTTACG | AACTGACCCC | GAACATGGCA | ATTATCGACA | CCGAGCTGAT  | GCTGAACATG  |
| 1921 | CCGCGCAAGC | TGACCGCTGC | TACCGGCATC | GACGCTCTGG | TACATGCTAT  | TGAGGCGTAC  |
| 1981 | GTTTCCGTGA | TGGCTACCGA | TTACACCGAC | GAAGTGGCCC | TGCGTGCGAT  | CAAAAATGATT |
| 2041 | TTCAAGTACC | TGCCTCGCGC | TTACAAAAAC | GGCACGAATG | ACATCGAGGC  | GCGTGAGAAA  |
| 2101 | ATGGCCCATG | CAAGCAACAT | CGCGGGCATG | GCCTTCGCCA | ACGCGTTTCT  | GGGCGTGTGC  |
| 2161 | CACTCTATGG | CTCACAAACT | GGGTGCTATG | CACCACGTGC | CGCACGGTAT  | CGCGTGTGCT  |
| 2221 | GTCCTGATCG | AAGAAGTAAT | TAAGTACAAC | GCTACTGATT | GCCCAGACTAA | ACAGACCGCC  |
| 2281 | TTCCACAGT  | ACAAATCTCC | TAACGCTAAA | CGTAAGTACG | CTGAGATCGC  | CGAATACCTG  |
| 2341 | AACCTGAAGG | GTACGAGCGA | CACTGAGAAA | GTTACTGCGC | TGATCGAAGC  | TATCTCTAAA  |
| 2401 | CTGAAAATTG | ACCTGTCCAT | CCCGCAGAAC | ATCAGCGCCG | CAGGCATCAA  | CAAAAAGGAC  |
| 2461 | TTTTACAACA | CGCTGGACAA | AATGAGCGAA | CTGGCTTTTG | ACGACCAGTG  | CACCACTGCA  |
| 2521 | AACCCGCGTT | ACCCGCTGAT | CTCTGAGCTG | AAAGACATTT | ATATCAAATC  | TTTTTAA     |

**AdhE2.92 (77021)**

|      |             |            |             |            |             |             |
|------|-------------|------------|-------------|------------|-------------|-------------|
| 1    | ATGAAAGTGA  | CGAACCAAAA | AGAAGTAAAA  | CAAAAAGTGA | ATGAACTGCG  | TGAGGCCCCAG |
| 61   | AAAAAGTTCC  | TGACGTATAC | CCAGGAGCAA  | GTTGACAAGA | TCTTCAAACA  | GTGTGCCATT  |
| 121  | GCGGCTGCCA  | AAGAGCGTAT | TAAGTGGGCC  | AAACTGGCCG | TGGAAGAAAC  | CGGCATCGGT  |
| 181  | CTGGTCGAGG  | ACAAGATTAT | CAAGAATCAC  | TTTGCCGCGG | AGTATATCTA  | CAACAAATAC  |
| 241  | AAAAACGAAA  | AGACTTGCGG | CATCATTGAT  | CATGATGACA | GCTTGGGTAT  | CACGAAAGTC  |
| 301  | GCAGAACCAA  | TCGGTATTGT | CGCGGCAATT  | GTCCCGACCA | CTAATCCGAC  | CAGCACCAGC  |
| 361  | ATCTTCAAGA  | GCTTGATCAG | CCTGAAAACC  | CGCAACGCGA | TTTTCTTCAG  | CCCGCACCCG  |
| 421  | CGTGCGAAGA  | AGAGCACCAT | CGCAGCGGCG  | AAGCTGATTT | TGGATGCCGC  | GGTTAAGGCC  |
| 481  | GGTGACCCGA  | AAAACATTAT | TGGCTGGATT  | GACGAGCCGA | GCATTGAGCT  | GTCTCAGGAC  |
| 541  | CTGATGAAAG  | AACCGGACAT | TATCTGGGCC  | ACCGGTGGTC | CGTCTATGGT  | TAAGGCAGCG  |
| 601  | TACTCCAGCG  | GTAAGCCTGC | TATCGGCGTT  | GGTGCGGGCA | ATACGCCGGC  | TATCATCGAT  |
| 661  | GAAAGCGCGG  | ATATTGATAT | GGCAGTTAGC  | TCCATCATTC | TGTCCAAAAC  | CTACGACAAT  |
| 721  | GGTGTATATCT | GTGCAAGCGA | GCAAAGCATC  | CTGGTGATGA | ATAGCATTTA  | CGAGAAGGTC  |
| 781  | AAAGAAAGAGT | TTGTAAAGCG | TGGTTCCCTAT | ATTCTGAACC | AGAACGAGAT  | TGCAAAAATC  |
| 841  | AAAGAAACGA  | TGTTAAAGAA | TGGCGCGATT  | AATGCAGATA | TTGTTGGTAA  | GTCCGCATAC  |
| 901  | AAATATCGCGA | AGATGGCGGG | TATCGAAGTT  | CCGCAAACCA | CCAAAATCTT  | GATCGGGCAA  |
| 961  | GTGCAGGACG  | TGGAGGCGAG | CGAACTGTTC  | AGCCATGAGA | AACTGAGCCC  | GGTTCTGGCT  |
| 1021 | ATGTACAAAG  | TGAAGGACTT | TGACGAAGCC  | CTGAAGAAAG | CTCAGCGTCT  | GATTGAGCTG  |
| 1081 | GGCGGCAGCG  | GTCACACGAG | CAGCCTGTAT  | ATCGATAGCC | AAAACAATAA  | GGACAAGGTG  |
| 1141 | AAAGAGTTCG  | GTCTGGCGAT | GAAAACCTCT  | CGCACGTTTA | TCAACATGCC  | GAGCAGCCAA  |
| 1201 | GGTGCAGAGC  | GCGATCTGTA | TAAGTTCGCA  | ATCGCGCCTT | CTTTTACGCT  | GGGTTGCGGT  |
| 1261 | ACCTGGGGCG  | GTAATTCGGT | GAGCCAGAAT  | GTCGAGCCGA | AGCACCTGCT  | GAACATCAAA  |
| 1321 | TCGGTCCGCG  | AGCGCCGTGA | GAAGAGACCG  | TGGTTCAAAG | TCCCACAGAA  | AATTTACTTC  |
| 1381 | AAATACGGCT  | GCCTGCGTTT | CGCGCTGAAA  | GAAGTGAAG  | ACATGAACAA  | AAAGCGTGCG  |
| 1441 | TTCATTGTTA  | CCGACAAAGA | CCTGTTCAAA  | CTGGGTTACG | TGAACAAAAT  | CACCAAAGTT  |
| 1501 | CTGGATGAAA  | TTGACATCAA | GTACTCCATC  | TTCATGATA  | TCAAATCCGA  | CCCAACGATT  |
| 1561 | GATAGCGTGA  | AAAAGGGCGC | TAAAGAAATG  | CTGAACTTTG | AACCGGACAC  | CATCATCAGC  |
| 1621 | ATCGGTGGTG  | GCTCTCCTAT | GGATGCTGCG  | AAGGTCATGC | ACCTGCTGTA  | CGAATACCCG  |
| 1681 | GAAGCGGAAA  | TCGAAAACCT | GGCTATCAAC  | TTCATGGACA | TCCGCAAACG  | TATCTGCAAC  |
| 1741 | TTCCCGAAGC  | TGGGCACTAA | AGCTATTTCC  | GTTGCCATCC | CGACTACCGC  | GGGCACTGGT  |
| 1801 | TCCGAAGCCA  | CGCCGTTCGC | CGTGATCACC  | AACGATGAAA | CCGGTATGAA  | ATACCCGCTG  |
| 1861 | ACCTCTTACG  | AACTGACCCC | GAACATGGCA  | ATTATCGACA | CCGAGCTGAT  | GCTGAACATG  |
| 1921 | CCGCGCAAGC  | TGACCGCTGC | TACCGGCATC  | GACGCTCTGG | TACATGCTAT  | TGAGGCGTAC  |
| 1981 | GTTTCCGTGA  | TGGCTACCGA | TTACACCGAC  | GAAGTGGCCC | TGCGTGCGAT  | CAAAAATGATT |
| 2041 | TTCAAGTACC  | TGCCTCGCGC | TTACAAAAAC  | GGCACGAATG | ACATCGAGGC  | GCGTGAGAAA  |
| 2101 | ATGGCCCATG  | CAAGCAACAT | CGCGGGCATG  | GCCTTCGCCA | ACGCGTTTCT  | GGGCGTGTGC  |
| 2161 | CACTCTATGG  | CTCACAAACT | GGGTGCTATG  | CACCACGTGC | CGCACGGTAT  | CGCGTGTGCT  |
| 2221 | GTCCTGATCG  | AAGAAGTAAT | TAAGTACAAC  | GCTACTGATT | GCCCAGACTAA | ACAGACCGCC  |
| 2281 | TTCCACAGT   | ACAAATCTCC | TAACGCTAAA  | CGTAAGTACG | CTGAGATCGC  | CGAATACCTG  |
| 2341 | AACCTGAAGG  | GTACGAGCGA | CACTGAGAAA  | GTTACTGCGC | TGATCGAAGC  | TATCTCTAAA  |
| 2401 | CTGAAAATTG  | ACCTGTCCAT | CCCGCAGAAC  | ATCAGCGCCG | CAGGCATCAA  | CAAAAAGGAC  |
| 2461 | TTTTACAACA  | CGCTGGACAA | AATGAGCGAA  | CTGGCTTTTG | ACGACCAGTG  | CACCACTGCA  |
| 2521 | AACCCGCGTT  | ACCCGCTGAT | CTCTGAGCTG  | AAAGACATTT | ATATCAAATC  | TTTTTAA     |

**AdhE2.93 (77022)**

```

1 ATGAAAGTGA CGAACCAAAA AGAACTGAAA CAAAAACTGA ATGAACTGCG TGAGGCCAG
61 AAAAAAGTTCC TGTGCTATAC CCAGGAGCAA GTTGACAAGA TCTTCAAACA GTGTGCCATT
121 GCGGCTGCCA AAGAGCGTAT TAACTTGGCC AAACTGGCGG TGAAGAAAAC CGGCATCGGT
181 CTGGTCGAGG ACAAGATTAT CAAGAATCAC TTTGCCGCGG AGTATATCTA CAACAAATAC
241 AAAAAACCACA AGACTTGCGG CATCATTGAT CATGATGACA GCTTGGGTAT CACGAAAGTC
301 GCAGAACCAA TCGGTATTGT CGCGGCAATT GTCCCGACCA CTAATCCGAC CAGCACCAGC
361 ATCTTCAAGA GCTTGATCAG CCTGAAAACC CGCAACGCGA TTTTCTTCAG CCCGCACCCG
421 CGTGCGAAGA AGAGCACCAT CGCAGCGGCG AAGCTGATTT TGGATGCCGC GGTTAAGGCC
481 GGTGCACCGA AAAACATTAT TGGCTGGATT GACGAGCCGA GCATTGAGCT GTCTCAGGAC
541 CTGATGAGCG AAGCGGACAT TATCTGGCC ACCGGTGGTC CGTCTATGGT TAAGGCAGCG
601 TACTCCAGCG GTAAGCCTGC TATCGGCGTT GGTGCGGGCA ATACGCCGGC TATCATCGAT
661 GAAAGCGCGG ATATTGATAT GGCAGTTAGC TCCATCATTG TGTCAAAAAC CTACGACAAT
721 GGTGTTATCT GTGCAAGCGA GCAAAGCATC CTGGTGATGA ATAGCATTTA CGAGAAGGTC
781 AAAGCGAGT TGTGTAAGCG TGGTTCCTAT ATTCTGAACC AGAACGAGAT TGCAAAAATC
841 AAAGAAACGA TGTGTAAGAA TGGCGCGATT AATCGTGATA TTGTTGGTAA GTCCGCATAC
901 ATTATCGCGA AGATGGCGGG TATCGAAGTG CCGCAAACCA CCAAATCTT GATCGGCGAA
961 GTGCAGAGCG TGGAGAAGAG CGAACTGTTC AGCCATGAGA AACTGAGCCC GGTTCCTGGCT
1021 ATGTACAAAG TGAAGGACTT TGACGAAGCC CTGAAGAAAG CTCAGCGTCT GATTGAGCTG
1081 GGCGGCAGCG GTCACACGAG CAGCCTGTAT ATCGATAGCC AAAACAATAA GGACAAGTG
1141 AAGAGTTCG GTCTGGCGAT GAAAACCTCT CGCACGTTTA TCAACATGCC GAGCAGCCAA
1201 GGTGCGAGCG GCGATCTGTA TAACTTCGCA ATCGCGCCTT CTTTTACGCT GGGTTGCGGT
1261 ACCTGGGGCG GTAATTCGGT GAGCCAGAAT GTCGAGCCGA AGCACCTGCT GAACATCAAA
1321 TCGGTCGCGG AGCGCCGTGA GAAGAGACCG TGTTCAAAG TCCCACAGAA AATTTACTTC
1381 AAATACGGCT GCCTGCGTTT CCGCTGAAA GAACTGAAAG ACATGAACAA AAAGCGTGCG
1441 TTCATTGTTA CCGACAAAAG CCTGTTCAA CTGGGTTACG TGAACAAAAT CACCAAAGTT
1501 CTGGATGAAA TTGACATCAA TACTCCATC TTCACTGATA TCAAATCCGA CCCAACGATT
1561 GATAGCGTGA AAAAGGGCGC TAAAGAAATG CTGAACTTTG AACCGGACAC CATCATCAGC
1621 ATCGGTGGTG GCTCTCCTAT GGATGCTGCG AAGGTCATGC ACCTGCTGTA CGAATACCCG
1681 GAAGCGAAA TCGAAAACCT GGCTATCAAC TTCATGGACA TCCGAAAACG TATCTGCAAC
1741 TTCCGAAGC TGGGCACTAA AGCTATTTCC GTTGCCATCC CGACTACCGC GGGCACTGGT
1801 TCCGAAGCCA CGCCGTTCCG CGTGATCACC AACGATGAAA CCGGTATGAA ATACCCGCTG
1861 ACCTCTTACG AACTGACCCC GAACATGGCA ATTATCGACA CCGAGCTGAT GCTGAACATG
1921 CCGCGAAGC TGACCGCTGC TACCGGCATC GACGCTCTGG TACATGCTAT TGAGGCGTAC
1981 GTTTCGCGTA TGGCTACCGA TTACACCGAC GAACTGGCCC TCGGTGCGAT CAAAATGATT
2041 TTCAAGTACC TGCTCGCGC TTACAAAAAC GGCACGAATG ACATCGAGGC GCGTGAGAAA
2101 ATGGCCATG CAAGCAACAT CGCGGGCATG GCCTTCGCCA ACGCGTTCC TGGCGTGTGC
2161 CACTCTATGG CTCACAAACT GGGTGTATG CACCACGTGC CGCACGGTAT CGCGTGTGCT
2221 GTCCTGATCG AAGAAGTAAT TAAGTACAAC GCTACTGATT GCCCGACTAA ACAGACCCTG
2281 TTCCCACAGT ACAAATCTCC TAACGCTAAA CGTAAGTACG CTGAGATCGC CGAATACCTG
2341 AACCTGAAGG GTACGAGCGA CACTGAGAAA GTTACTGCGC TGATCGAAGC TATCTCTAAA
2401 CTGAAAATTG ACCTGTCCAT CCCGCGAAGC ATCAGCGCCG CAGGCATCAA CAAAAAGGAC
2461 TTTTACAACA CGCTGGACAA AATGAGCGAA CTGGCTTTTG ACGACCAGTG CACCACTGCA
2521 AACCCGCGTT ACCCGCTGAT CTCTGAGCTG AAAGACATTT ATATCAAATC TTTTTAA

```

**AdhE2.94 (77023)**

```

1 ATGAAAGTGA CGAACCAAAA AGAACTGAAA CAAAAACTGA ATGAACTGCG TGAGGCCAG
61 AAAAAAGTTCC CTACGTATAC CCAGGAGCAA GTTGACAAGA TCTTCAAACA GTGTGCCATT
121 GCGGCTGCCA AATACCGTAT TAACTTGGCC AAACTGGCGG TGAAGAAAAC CGGCATCGGT
181 CTGGTCGAGG ACAAGATTAT CAAGAATCAC TTTGCCGCGG AGTATATCTA CAACAAATAC
241 AAAAAACGAAA AGACTTGCGG CATCATTGAT CATGATGACA GCTTGGGTAT CACGAAAGTC
301 GCAGAACCAA TCGGTATTGT CGCGGCAATT GTCCCGACCA CTAATCCGAC CAGCACCAGC
361 ATCTTCAAGA GCTTGATCAG CCTGAAAACC CGCAACGCGA TTTTCTTCAG CCCGCACCCG
421 CGTGCGAAGA AGAGCACCAT CGCAGCGGCG AAGCTGATTT TGGATGCCGC GGTTAAGGCC
481 GGTGCACCGA AAAACATTAT TGGCTGGATT GACGAGCCGA GCATTGAGCT GTCTCAGGAC
541 CTGATGAGCG AACCGGACAT TATCTGGCC ACCGGTGGTC CGTCTATGGT TAAGGCAGCG
601 TACTCCAGCG GTAAGCCTGC TATCGGCGTT GGTGCGGGCA ATACGCCGGC TATCATCGAT
661 GAAAGCGCGG ATATTGATAT GGCAGTTAGC TCCATCATTG TGTCAAAAAC CTACGACAAT
721 GGTGTTATCT GTGCAAGCGA GCAAAGCATC CTGGTGATGA ATAGCATTTA CGAGAAGGTC
781 AAAGAAAGT TGTGTAAGCG TGGTTCCTAT ATTCTGAACC AGAACGAGAT TGCAAAAATC
841 AAAGAAACGA TGTGTAAGAA TGGCGCGATT AATCGAGATA TTGTTGGTAA GTCCGCATAC

```

|      |            |            |            |            |             |             |
|------|------------|------------|------------|------------|-------------|-------------|
| 901  | ATTATCGCGA | AGATGGCGGG | TATCGAAGTG | CCGCAAACCA | CCAAAATCTT  | GATCGGCGAA  |
| 961  | GTGCAGAGCG | TGGAGAAGAG | CGAACTGTTC | AGCGTTGAGC | TGCTGAGCCC  | GGTTCTGGCT  |
| 1021 | ATGTACAAAG | TGAAGGACTT | TGACGAAGCC | CTGAAGAAAG | CTGAGCGTCT  | GATTGAGCTG  |
| 1081 | GGCGGCAGCG | GTACACGAG  | CAGCCTGTAT | ATCGATAGCC | AAAACAATAA  | GGACAAGGTG  |
| 1141 | AAAGAGTTCG | GTCTGGCGAT | GAAAACCTCT | CGCACGTTTA | TCAACATGCC  | GAGCAGCCAA  |
| 1201 | GGTGCAGCG  | GCGATCTGTA | TAACCTCGCA | ATCGCGCCTT | CTTTTACGCT  | GGGTTGCGGT  |
| 1261 | ACCTGGGGCG | GTAATTCGGT | GAGCCAGAAT | GTCGAGCCGA | AGCACCTGCT  | GAACATCAAA  |
| 1321 | TCGGTTCGCG | AGCGCCGTGA | GAAGAGACCG | TGGTTCAAAG | TCCCACAGAA  | AATTTACTTC  |
| 1381 | AAATACGGCT | GCCTGCGTTT | CGCGCTGAAA | GAAGTAAAAG | ACATGAACAA  | AAAGCGTGCG  |
| 1441 | TTCATTGTTA | CCGACAAAAG | CCTGTTCAAA | CTGGGTTACG | TGAACAAAAT  | CACCAAAGTT  |
| 1501 | CTGGATGAAA | TTGACATCAA | GTACTCCATC | TTCACTGATA | TCAAATCCGA  | CCCAACGATT  |
| 1561 | GATAGCGTGA | AAAAGGGCGC | TAAAGAAATG | CTGAACCTTG | AACCGGACAC  | CATCATCAGC  |
| 1621 | ATCGGTGGTG | GCTCTCCTAT | GGATGCTGCG | AAGGTCATGC | ACCTGCTGTA  | CGAATACCCG  |
| 1681 | GAAGCGGAAA | TCGAAAACCT | GGCTATCAAC | TTCATGGACA | TCCGAAAACG  | TATCTGCAAC  |
| 1741 | TTCCCGAAGC | TGGGCACTAA | AGCTATTTCC | GTTGCCATCC | CGACTACCGC  | GGGCACTGGT  |
| 1801 | TCCGAAGCCA | CGCCGTTTCG | CGTGATCACC | AACGATGAAA | CCGGTATGAA  | ATACCCGCTG  |
| 1861 | ACCTCTTACG | AACTGACCCC | GAACATGGCA | ATTATCGACA | CCGAGCTGAT  | GCTGAACATG  |
| 1921 | CCCGCAAGC  | TGACCGCTGC | TACCGGCATC | GACGCTCTGG | TACATGCTAT  | TGAGGCGTAC  |
| 1981 | GTTTCCGTGA | TGGTACCGA  | TTACACCGAC | GAAGTGGCCC | TGCGTGCAT   | CAAAAATGATT |
| 2041 | TTCAAGTACC | TGCCCTCGCG | TTACAAAAAC | GGCACGAATG | ACATCGAGGC  | GCGTGAGAAA  |
| 2101 | ATGGCCATG  | CAAGCAACAT | CGCGGGCATG | GCCTTCGCCA | ACGCGTTCCCT | GGGCGTGTGC  |
| 2161 | CACTCTATGG | CTCACAAACT | GGGTGCTATG | CACCACGTGC | CGCACGGTAT  | CGCGTGTGCT  |
| 2221 | GTCTGATCG  | AAGAAGTAAT | TAAGTACAAC | GCTACTGATT | GCCCCACTAA  | ACAGACCCGC  |
| 2281 | TTCCACAGT  | ACAAATCTCC | TAACGCTAAA | CGTAAGTACG | CTGAGATCGC  | CGAATACCTG  |
| 2341 | AACCTGAAGG | GTACGAGCGA | CACTGAGAAA | GTTACTGCGC | TGATCGAAGC  | TATCTCTAAA  |
| 2401 | CTGAAAATG  | ACCTGTCCAT | CCCGCAGAAC | ATCAGCGCCG | CAGGCATCAA  | CAAAAAGGAC  |
| 2461 | TTTTACAACA | CGCTGGACAA | AATGAGCGAA | CTGGCTTTTG | ACGACCAGTG  | CACCACTGCA  |
| 2521 | AACCGCGT   | ACCCGCTGAT | CTCTGAGCTG | AAAGACATTT | ATATCAAATC  | TTTTTAA     |

**AdhE2.95 (77024)**

|      |             |            |            |             |            |            |
|------|-------------|------------|------------|-------------|------------|------------|
| 1    | ATGAAAAGTGA | CGAACCAAAA | AGAAGTAAA  | CAAAAAGTGA  | ATGAACTGCG | TGAGGCCAG  |
| 61   | AAAAAGTTCG  | CTACGTATAC | CCAGGAGCAA | GTTGACAAGA  | TCTTCAAACA | GTGTGCCATT |
| 121  | GCGGTGCGCA  | AATACCGTAT | TAACCTGGCC | AAACTGGCGG  | TGGAAGAAAC | CGGCATCGGT |
| 181  | CTGGTCGAGG  | ACAAGATTAT | CAAGAATCAC | TTTGCCGCGG  | AGTATATCTA | CAACAAATAC |
| 241  | AAAAACGAAA  | AGACTTGCAG | CATCATTGAT | CATGATGACA  | GCTTGGGTAT | CACGAAAGTC |
| 301  | GCAGAACCAA  | TCGGTATTGT | CGCGGCAATT | GTCCCGACCA  | CTAATCCGAC | CAGCACCGCG |
| 361  | ATCTTCAAGA  | GCTTGATCAG | CCTGAAAACC | CGCAACGCGA  | TTTTCTTCAG | CCCGCACCCG |
| 421  | CGTGCGAAGA  | AGAGCACCAT | CGCAGCGGCG | AAGCTGATTT  | TGGATGCCCG | GGTTAAGGCC |
| 481  | GGTGACCCGA  | AAAACATTAT | TGGCTGGATT | GACGAGCCGA  | GCATTGAGCT | GTCTCAGGAC |
| 541  | CTGATGAGCG  | AAGCGGACAT | TATTCTGGCC | ACCGGTGGTC  | CGTCTATGGT | TAAGGCAGCG |
| 601  | TACTCCAGCG  | GTAAGCCTGC | TATCGGCGTT | GGTGGCGGCA  | ATACGCCCGC | TATCATCGAT |
| 661  | GAAAGCGCGG  | ATATTGATAT | GGCAGTTAGC | TCCATCATT   | TGTCCAAAAC | CTACGCAAT  |
| 721  | GGTGTATCT   | GTGCAAGCGA | GCAAAGCATC | CTGGTGATGA  | ATAGCATTTA | CGAGAAGGTC |
| 781  | AAAGAAGAGT  | TTGTTAAGCG | TGGTTCCTAT | ATTCTGAACC  | AGGAGGAGAT | TGCAAAAATC |
| 841  | AAAGAAACGA  | TGTTAAGAA  | TGGCGCGATT | AATCGTGATA  | TGTTGGTAA  | GTCCGCATAC |
| 901  | ATTATCGCGA  | AGATGGCGGG | TATCGAAGTG | CCGCAAACCA  | CCAAAATCTT | GATCGGCGAA |
| 961  | GTGCAGAGCG  | TGGAGAAGAG | CGAACTGTTC | AGCCATGAGA  | AACTGAGCCC | GGTTCTGGCT |
| 1021 | ATGTACAAAG  | TGAAGGACTT | TGACGAAGCC | CTGGACAAAAG | CTCAGCGTCT | GATTGAGCTG |
| 1081 | GGCGGCAGCG  | GTACACGAG  | CAGCCTGTAT | ATCGATAGCC  | AAAACAATAA | GGACAAGGTG |
| 1141 | AAAGAGTTCG  | GTCTGGCGAT | GAAAACCTCT | CGCTTCTTTA  | TCAACATGCC | GAGCAGCCAA |
| 1201 | GGTGCAGCG   | GCGATCTGTA | TAACCTCGCA | ATCGCGCCTT  | CTTTTACGCT | GGGTTGCGGT |
| 1261 | ACCTGGGGCG  | GTAATTCGGT | GAGCCAGAAT | GTCGAGCCGA  | AGCACCTGCT | GAACATCAAA |
| 1321 | TCGGTTCGCG  | AGCGCCGTGA | GAAGAGACCG | TGGTTCAAAG  | TCCCACAGAA | AATTTACTTC |
| 1381 | AAATACGGCT  | GCCTGCGTTT | CGCGCTGAAA | GAAGTAAAAG  | ACATGAACAA | AAAGCGTGCG |
| 1441 | TTCATTGTTA  | CCGACAAAAG | CCTGTTCAAA | CTGGGTTACG  | TGAACAAAAT | CACCAAAGTT |
| 1501 | CTGGATGAAA  | TTGACATCAA | GTACTCCATC | TTCACTGATA  | TCAAATCCGA | CCCAACGATT |
| 1561 | GATAGCGTGA  | AAAAGGGCGC | TAAAGAAATG | CTGAACCTTG  | AACCGGACAC | CATCATCAGC |
| 1621 | ATCGGTGGTG  | GCTCTCCTAT | GGATGCTGCG | AAGGTCATGC  | ACCTGCTGTA | CGAATACCCG |
| 1681 | GAAGCGGAAA  | TCGAAAACCT | GGCTATCAAC | TTCATGGACA  | TCCGAAAACG | TATCTGCAAC |
| 1741 | TTCCCGAAGC  | TGGGCACTAA | AGCTATTTCC | GTTGCCATCC  | CGACTACCGC | GGGCACTGGT |
| 1801 | TCCGAAGCCA  | CGCCGTTTCG | CGTGATCACC | AACGATGAAA  | CCGGTATGAA | ATACCCGCTG |
| 1861 | ACCTCTTACG  | AACTGACCCC | GAACATGGCA | ATTATCGACA  | CCGAGCTGAT | GCTGAACATG |

|      |            |            |            |            |             |            |
|------|------------|------------|------------|------------|-------------|------------|
| 1921 | CCGCGCAAGC | TGACCGCTGC | TACCGGCATC | GACGCTCTGG | TACATGCTAT  | TGAGGCGTAC |
| 1981 | GTTTCCGTGA | TGGCTACCGA | TTACACCGAC | GAAGTGGCCC | TGCGTGCGAT  | CAAAATGATT |
| 2041 | TTCAAGTACC | TGCCTCGCGC | TTACAAAAAC | GGCACGAATG | ACATCGAGGC  | GCGTGAGAAA |
| 2101 | ATGGCCCATG | CAAGCAACAT | CGCGGGCATG | GCCTTCGCCA | ACGCGTTCCCT | GGGCGTGTGC |
| 2161 | CACTCTATGG | CTCACAAACT | GGGTGCTATG | CACCACGTGC | CGCACGGTAT  | CGCGTGTGCT |
| 2221 | GTCCTGATCG | AAGAAGTAAT | TAAGTACAAC | GCTACTGATT | GCCCCACTAA  | ACAGACCGCC |
| 2281 | TTCCACAGT  | ACAAATCTCC | TAACGCTAAA | CGTAAGTACG | CTGAGATCGC  | CGAATACCTG |
| 2341 | AACCTGAAGG | GTACGAGCGA | CACTGAGAAA | GTTACTGCGC | TGATCGAAGC  | TATCTCTAAA |
| 2401 | CTGAAAATTG | ACCTGTCCAT | CCCGCAGAAC | ATCAGCGCCG | CAGGCATCAA  | CAAAAAGGAC |
| 2461 | TTTTACAACA | CGCTGGACAA | AATGAGCGAA | CTGGCTTTTG | ACGACCAGTG  | CACCACTGCA |
| 2521 | AACCCGCGTT | ACCCGCTGAT | CTCTGAGCTG | AAAGACATTT | ATATCAAATC  | TTTTTTAA   |

**AdhE2.96 (77025)**

|      |            |            |             |            |             |             |
|------|------------|------------|-------------|------------|-------------|-------------|
| 1    | ATGAAAGTGA | CGAACCAAAA | AGAAGTAAAA  | CAAAAAGTGA | ATGAAAGTGC  | TGAGGCCCGAG |
| 61   | AAAAAGTTTC | CTACGTATAC | CCAGGAGCAA  | GTTGACAAGA | TCTTCAAACA  | GTGTGCCATT  |
| 121  | GCGGCTGCCA | AAGAGCGTAT | TAAGTGGGCC  | GAGCTGGCGG | TGGAAGAAAC  | CGGCATCGGT  |
| 181  | CTGGTCGAGG | ACAAGATTAT | CAAGAATCAC  | TTTGCCGCGG | AGTATATCTA  | CAACAAATAC  |
| 241  | AAAAACGGTA | AGACTTGCCG | CATCATTGAT  | CATGATGACA | GCTTGGGTAT  | CACGAAAGTC  |
| 301  | GCAGAACCAA | TCGGTATTGT | CGCGGCAATT  | GTCCCGACCA | CTAATCCGAC  | CAGCACCGCG  |
| 361  | ATCTTCAAGA | GCTTGATCAG | CCTGAAAACC  | CGCAACGCGA | TTTTCTTCAG  | CCCGCACCCG  |
| 421  | CGTGCGAAGA | AGAGCACCAT | CGCAGCGGCG  | AAGCTGATTT | TGGATGCCGC  | GGTTAAGGCC  |
| 481  | GGTGACCCGA | AAAACATTAT | TGGCTGGATT  | GACGAGCCGA | GCATTGAGCT  | GTCTCAGGAC  |
| 541  | CTGATGAGCG | AAGCGGACAT | TATTCTGGCC  | ACCGGTGGTC | CGTCTATGGT  | TAAGGCAGCG  |
| 601  | TACTCCAGCG | GTAAGAAAGC | TATCGGCGCG  | GGTGCGGGCA | ATACGCCGGC  | TATCATCGAT  |
| 661  | GAAAGCGCGG | ATATTGATAT | GGCAGTTAGC  | TCCATCATTC | TGTCCGCGAC  | CTACGACAAT  |
| 721  | GGTGTATCT  | GTGCAAGCGA | GCAAAGCATC  | CTGGTGATGA | ATAGCATTTA  | CGAGAAGGTC  |
| 781  | AAAGAAGAGT | TTGTTAAGCG | TGGTTCCTAT  | ATTCTGAACC | AGAACGAGAT  | TGCAAAAATC  |
| 841  | AAAGAAACGA | GTTTAAGAA  | TGGCGCGATT  | AATGCAGATA | TTGTTGGTAA  | GTCCGCATAC  |
| 901  | ATTATCGCGA | AGATGGCGGG | TATCGAAGTG  | CCGCAAACCA | CCAAAATCTT  | GATCGGCGAA  |
| 961  | GTGCAGAGCG | TGGAGAAGAG | CGAACTGTTC  | AGCCATGAGA | AACTGAGCCC  | GGTCTGGCT   |
| 1021 | ATGTACAAAG | TGAAGGACTT | TGACGAAGCC  | CTGAAGAAAG | CTCAGCGTCT  | GATTGAGCTG  |
| 1081 | GGCGGCAGCG | GTCACACGAG | CAGCCTGTAT  | ATCGATAGCC | AAAACAATAA  | GGACAAGGTG  |
| 1141 | AAAGAGTTTC | GTCTGGCGAT | GAAAACCTCT  | CGCACGTTTA | TCAACATGCC  | GAGCAGCCAA  |
| 1201 | GGTGCAGGCG | GCGATCTGTA | TAAGTTCGCA  | ATCGCGCCTT | CTTTTACGCT  | GGGTGCGGT   |
| 1261 | ACCTGGGGCG | GTAATTCGGT | GAGCCAGAAT  | GTCGAGCCGA | AGCACCTGCT  | GAACATCAA   |
| 1321 | TCGGTCGCGG | AGCGCCGTGA | GAAGAGACCG  | TGGTTCAAAG | TCCCACAGAA  | AATTTACTTC  |
| 1381 | AAATACGGCT | GCCTGCGTTT | CGCGCTGAAA  | GAAGTGAAG  | ACATGAACAA  | AAAGCGTGGC  |
| 1441 | TTCATTGTTA | CCGACAAAGA | CCTGTTCAAA  | CTGGGTTACG | TGAACAAAAT  | CACCAAAGTT  |
| 1501 | CTGGATGAAA | TTGACATCAA | GTAAGTCCATC | TTCATGATA  | TCAAATCCGA  | CCCAACGATT  |
| 1561 | GATAGCGTGA | AAAAGGGCGC | TAAAGAAATG  | CTGAAGTTTG | AACCGGACAC  | CATCATCAGC  |
| 1621 | ATCGGTGGTG | GCTCTCCTAT | GGATGCTGCG  | AAGGTGATGC | ACCTGCTGTA  | CGAATACCCG  |
| 1681 | GAAGCGGAAA | TCGAAAACCT | GGTATCAAC   | TTCATGGACA | TCCGAAAACG  | TATCTGCAAC  |
| 1741 | TTCCCGAAGC | TGGGCACTAA | AGCTATTTCC  | GTTGCCATCC | CGACTACCGC  | GGGCACTGGT  |
| 1801 | TCCGAAGCCA | CGCCGTTTCG | CGTGATCACC  | AACGATGAAA | CCGGTATGAA  | ATACCCGCTG  |
| 1861 | ACCTCTTACG | AACTGACCCC | GAACATGGCA  | ATTATCGACA | CCGAGCTGAT  | GCTGAACATG  |
| 1921 | CCGCGCAAGC | TGACCGCTGC | TACCGGCATC  | GACGCTCTGG | TACATGCTAT  | TGAGGCGTAC  |
| 1981 | GTTTCCGTGA | TGGCTACCGA | TTACACCGAC  | GAAGTGGCCC | TGCGTGCGAT  | CAAAATGATT  |
| 2041 | TTCAAGTACC | TGCCTCGCGC | TTACAAAAAC  | GGCACGAATG | ACATCGAGGC  | GCGTGAGAAA  |
| 2101 | ATGGCCCATG | CAAGCAACAT | CGCGGGCATG  | GCCTTCGCCA | ACGCGTTCCCT | GGGCGTGTGC  |
| 2161 | CACTCTATGG | CTCACAAACT | GGGTGCTATG  | CACCACGTGC | CGCACGGTAT  | CGCGTGTGCT  |
| 2221 | GTCCTGATCG | AAGAAGTAAT | TAAGTACAAC  | GCTACTGATT | GCCCCACTAA  | ACAGACCGCC  |
| 2281 | TTCCACAGT  | ACAAATCTCC | TAACGCTAAA  | CGTAAGTACG | CTGAGATCGC  | CGAATACCTG  |
| 2341 | AACCTGAAGG | GTACGAGCGA | CACTGAGAAA  | GTTACTGCGC | TGATCGAAGC  | TATCTCTAAA  |
| 2401 | CTGAAAATTG | ACCTGTCCAT | CCCGCAGAAC  | ATCAGCGCCG | CAGGCATCAA  | CAAAAAGGAC  |
| 2461 | TTTTACAACA | CGCTGGACAA | AATGAGCGAA  | CTGGCTTTTG | ACGACCAGTG  | CACCACTGCA  |
| 2521 | AACCCGCGTT | ACCCGCTGAT | CTCTGAGCTG  | AAAGACATTT | ATATCAAATC  | TTTTTTAA    |

**D2. AdhE2 homologs in the pCDF3-TdTer.AdhE29-45 plasmids**



| Name   | Accession No. |
|--------|---------------|
| AdhE30 | 317057809     |
| AdhE31 | 221194444     |
| AdhE32 | 302875249     |
| AdhE33 | 149276422     |
| AdhE34 | 15004865      |
| AdhE35 | 260891427     |
| AdhE36 | 126697906     |
| AdhE37 | 188590416     |
| AdhE38 | 300854834     |
| AdhE39 | 110802422     |
| AdhE40 | 210633271     |
| AdhE41 | 220930559     |
| AdhE42 | 168184834     |
| AdhE43 | 317133832     |
| AdhE44 | 307687897     |
| AdhE45 | 225571592     |

### D3. Monofunctional ALDH variants in the pCDF3-TdTer.ALDH1-15 and ALDH46 plasmids

#### ALDH1

ATGAATAAAG ACACCCTGAT TCCAACCTACC AAAGATCTGA AGCTGAAAAC TAATGTCGAA  
 AACATCAATT TGAAGAACTA CAAAGATAAC AGCTCGTGTT TTGGCGTGTT CGAAAACGTT  
 GAGAACGCGA TCAATTCCGC CGTTCACGCA CAGAAGATTC TGAGCCTGCA CTACACCAAA  
 GAGCAGCGTG AGAAGATCAT TACGGAAATC CGCAAAGCGG CGCTGGAGAA TAAAGAGGTG  
 CTGGCTACCA TGATTCTGGA AGAAACCCAC ATGGGTCGTT ATGAGGACAA AATCCTGAAG  
 CACGAGCTGG TCGCTAAGTA CACCCCTGGC ACCGAGGACC TGACGACCAC GGCATGGAGC  
 GGTGATAACG GTTTGACGGT CGTCGAAATG AGCCCGTATG GCGTCATTGG TGCAATTACC  
 CCTAGCACCA ATCCGACCGA AACTGTGATC TGCAACTCTA TCGGTATGAT TGCTGCGGGC  
 AATGCCGTCG TTTTCAATGG CCATCCGGGT GCGAAGAAGT GCGTTGCGTT CGCTATTGAA  
 ATGATCAACA AGGCGATCAT CTCCTGTGGT GGTCCGGAGA ACTTGGTGAC CACGATCAAA  
 AATCCGACGA TGGAGAGCCT GGATGCGATC ATTAACATC CGCTGATTAA ACTGTTGTGC  
 GGTACGGGCG GTCCGGGTAT GGTTAAAACG CTGCTGAATA GCGGCAAAAA GGCAATCGGT  
 GCCGGTGCGG GCAACCCGCC AGTTATCGTA GACGACACGG CGGACATTGA AAAGGCCGGT  
 AAGAGCATT AAGAGGGTTG TTCTTTTGAC AACAACTGTC CGTGTATTGC GGAGAAAGAA  
 GTGTTTGTT TCGAGAATGT GGCGGATGAC CTGATTAGCA ACATGCTGAA AAACAATGCA  
 GTTATCATCA ACGAGGATCA AGTCTCCAAG CTGATCGATC TGGTGTGCA GAAAAACAAC  
 GAAACCCAAG AGTACTTCAT TAACAAGAAG TGGGTTGGTA AGGATGCAAA GCTGTTTAGC  
 GACGAGATTG ACGTGGAAG CCCGAGCAAT ATCAAATGCA TCGTGTGCGA GGTCAATGCA  
 AATCACCCGT TCGTTATGAC CGAACTGATG ATGCCGATCC TGCCGATTGT TCGCGTGAAA  
 GATATCGATG AGGCGGTCAA ATACACTAAG ATCGCGGAGC AGAATCGTAA ACATAGCGCG  
 TACATCTATA GCAAGAACAT CGACAACCTG AATCGTTTTG AACGTGAGAT CGACACCACG  
 ATTTTTGTGA AAAACGCAAA GAGCTTCGCC GGTGTGGGCT ATGAAGCCGA AGGCTTTACC  
 ACCTTTACCA TTGCGGGCAG CACGGGCGAG GGTATTACCT CTGCACGTAA TTTACCCGT  
 CAACGCCGCT GCGTTCTGGC CGGTTAA

#### ALDH2

ATGAATGACA TCGAAATCGC CCAAGCCGTA AGCACTATTC TGAGCAAGTT CACTAAAGCA

ACGCCTGACG AGGCTCCGGC GACCTCGGAA GCCGCACGTG TCGATGGTCT GGATGAGATT  
 GTGGCAAAAAG CCTTGGCCCA GCACAGCAGC GTGCGCGATG CTTCTGCGAT TAGCCAAGTT  
 GCGAAAGTTG CCAACGCTTC TACCGGTGCG TTCGATACGA TGGACGAGGC GATCTCCGCA  
 GCGGTTTTTG CACAGGTCCA ATATCGTCAT TGTTCTATGC AGGATCGCGC AAGCTTTATC  
 AATGGTATTC GCGACGTGTT CCTGCAAGAG GACGTGCTGT GTGCCCTGAG CCGCATGGCG  
 GTGGAAGAAA CCGGTATGGG TAACTACGAA GATAAGCTGA TCAAAAATCG CGTGGCCGCA  
 CTGAAAACGC CGGGTATTGA GGATCTGACG ACCAGCGCGG TTAGCGGCGA CCGTGGCCTG  
 ACGCTGATTG AATACAGCGC GTTCGGCGTC ATTGGCAGCA TCACCCCAAC CACGAACCCG  
 ACGGAAACGA TCATCAACAA TTCTATCGGC ATGCTGGCAG CGGGCAATAC CGTCGTCTTT  
 AGCCCGCACC CGCCTTCCCG CAAGGTTTCC CTGTACGCGG TGAATTGAT CAACAATAAA  
 CTGCGCGCAGC TGGGTGCACC GGCCAACATG GTAGTGACCG TGACCAAGCC GAGCATCGAC  
 AACACCAATG TTCTGATTAA TGATCCGCGT ATTAACATGC TGGTAGCAAC CGGCGGTCCG  
 GCGATTGTTA AGACCGTTAT GAGCAGCGGT AAAAAGGCGA TCGGTGCGGG TGCTGGTAAC  
 CCGCCTGCGG TTGTGGATGA AACGGCGGAC ATTGAGAAGG CTGCGCGTGA TATCATTAAA  
 GGTTCAGCT TCGACAACAA TCTGCCATGT GTCGCAGAAA AAGAGGTCAT CGTTGTCAAT  
 CAGGTTGCTG ATTACCTGAT CCATTGCATG AAGAAAAGCG GTGCCTATCT GCTGTGCGAC  
 AAGAACTGA GCCAGCAACT GCAGAGCCTG GTCTTGAACG AGAAGGGTAC TGGCCCGAAT  
 ACCGCGTTCG TGGGCAAAGA CGCACGTTAC ATCCTGCAGC AACTGGGCAT CCAGGTTGGC  
 GACGACATTA AGGTCATTTT GATCGAAGCG GAGAAAACCC ACCCGTTTGT TGTTACAGAG  
 CTGATGATGC CGGTCTTGCC GGTGTGCGT GTGGACAATG TGGATGAGGC GATTGAGCTG  
 GCAGTGAAGG TGGAGCATGG TAACCGCCAC ACGGCGGTCA TGCCTCCAC CAACGTTGAG  
 AAGTTGACCA AGATGGCGCG TCTGATTCAA ACGACCATCT TTGTCAAAAA TGGTCCGTCG  
 TATGCGGGCC TGGGCGTTGG TGGTGAGGGT CATGCGACCT TTACCATTGC TGGCCCGACG  
 GGTGAAGGTC TGACCAGCGC CCGTAGCTTC GCACGTGCTC GTCGTTGCGT GATGGTCGAG  
 GCGCTGAACA TTCGCTAA

### ALDH3

ATGATTAAGG ACACTCTCGT AAGCATCACC AAGGATCTGA AATTGAAAAC GAATGTAGAG  
 AACGCCAATC TGAAGAACTA CAAGGACGAT TCGAGCTGCT TCGGTGTTTT TGAAAATGTG  
 GAGAATGCTA TTAGCAATGC GGTGCATGCG CAGAAAATCC TGTCCCTGCA TTACACCAAA  
 GAGCAACGCG AAAAGATCAT CACTGAGATT CGTAAGGCCG CACTGGAGAA TAAAGAGATC  
 CTGGCGACCA TGATTCTGGA AGAAACCCAC ATGGGTGCGTT ACGAGGATAA GATTCTGAAG  
 CACGAATTGG TTGCCAAGTA CACTCCGGGT ACCGAAGATC TGACCACCAC GGCGTGGAGC  
 GGTGATAACG GTCTGACCGT TGTCGAGATG AGCCCGTATG GTGTTATCGG TGCCATTACC  
 CCTTCTACGA ATCCGACGGA AACCGTGATC TGCAACAGCA TCGGCATGAT TGCGGCAGGC  
 AATACCGTGG TGTTCAATGG CCATCCGGGT GCCAAGAAGT GTGTCGCGTT TGCAGTTGAG  
 ATGATTAACA AAGCAATCAT TTCTTGTGGT GGCCCGGAAA ACCTGGTTAC CACCATCAAG  
 AACCCGACGA TGGACAGCTT GGACGCAATT ATCAAACACC CGTCCATTAA ACTGTGTGC  
 GGTACGGGTG GCCCAGGCAT GGTCAAGACG TTGCTGAACA GCGGTAAAAA GGCGATTGGT  
 GCGGGTGCCG GCAATCCGCC GGTCAATTGT GACGACACGG CTGACATCGA GAAAGCGGGC  
 AAAAGCATCA TTGAAGGCTG CAGCTTCGAC AACAATCTGC CGTGCATCGC GGAGAAAGAG  
 GTTTTTGTTT TTGAGAACGT CGCAGACGAT CTGATTTGCA ACATGCTGAA GAATAATGCG  
 GTCATTATCA ATGAGGACCA GGTTAGCAAA TTGATCGATC TGGTCCCTGCA GAAGAACAAC  
 GAGACTCAAG AATATAGCAT TAACAAAAAG TGGGTGGGTA AAGATGCGAA GCTGTTTCTG  
 GACGAGATTG ATGTGGAGTC TCCGAGCAGC GTTAAGTGTA TCATCTGCGA AGTGTCCGCT  
 CGCCACCCGT TCGTCATGAC CGAGCTGATG ATGCCGATCC TGCCAATTGT GCGTGTGAAA  
 GATATTGACG AAGCAATCGA GTACGCTAAA ATCGCAGAAC AAAATCGCAA ACACAGCGCA  
 TATATCTATA GCAAAAACAT CGACAACCTG AACCGTTTCC AACCGGAAAT TGATACCACC  
 ATTTTCGTCA AGAACGCTAA AAGCTTTGCG GGTGTTGGTT ACGAGGCCGA AGGCTTTACC  
 ACGTTCACCA TTGCGGGCAG CACGGGCGAG GGTATCACGT CCGCGCGTAA TTTACCCCGT  
 CAGCGTCGTT GTGTTCTGGC GGGTTAA

### ALDH4

ATGTCATTTG ATATCAACAA TGCACAAGGC GTATTTGAAA CGGTAGAAGC AGCAATTGAA  
 GCCACCCACA AAGCCAGGT GGAGTTCTAT GCGAACTCCA CTAAAGAGGG CCGTGAGGCG  
 ATCCTGACCG CTATCCGTGG CGCCGTGTTG GCGAAAGCGG AAGATTTCCG CAAAATGGTT

|            |            |             |            |             |             |
|------------|------------|-------------|------------|-------------|-------------|
| CGCGAAGAAA | CCAAGCTGGG | CCGTGTGCGAG | GATAAGATCG | CGAAACATCA  | ACTGACCGCA  |
| GCCAAGACCC | CGGGTACCGA | GGTCCTGGAA  | ACGAAGGTTT | GGAGCGGTGA  | CAACGGTATC  |
| AGCCTGGAAG | AGCGTGCGCC | GTACGGTGTC  | ATCGGCGCTG | TCACCCCGGT  | TACGAATCCG  |
| ACGGAAACGA | TCGTCAACAA | CGCAATTAGC  | ATGCTGGCGA | GCGGCAACGC  | GGTGACGTTT  |
| AATGTGCATC | CATCCTCGAA | AGTTGTGAGC  | GCAGTTATGA | TCGACATGAT  | TAACAAAACG  |
| ATTGTTGCTG | CGGGTGGTCC | GGCGAACCTG  | GTGACTATGG | TTAAAGAACC  | AACGCTGGAA  |
| ACGCTGAACG | AAATCGCGAA | AAGCCCCTG   | GTGAATATGT | TGGTTCGGTAC | GGGCGGTCCG  |
| GGCCTGGTGA | AGGCGATTCT | GCAATCTGGC  | AAGAAAGGTG | TCGGTGCGGG  | TGCGGGTAAT  |
| CCGCCGGTGA | TTGTTCGATG | ATCTGCTAAT  | CTGGACCTGG | CTGCAGCGGG  | TGTATACGGC  |
| GGTGCCAGT  | TCGACAATAA | CCTGTTGTGT  | ATTGGCGAGA | AAGAGGTGTT  | CGTTGAGGAT  |
| AGCGTCGCGG | ACGAGTTTCT | GGCTAAGTGT  | GAAGCGACCG | GTGCCTATGT  | TCTGAGCGCA  |
| GAAGAGGCGG | AGAAGTTGAC | CGCTCAGATC  | CTGACGATGG | ACGAGATCGA  | CCGTGCGAAA  |
| CCGTGTACCG | CACAGGAAAT | TGCGCGTGTG  | TGGCACCCGG | TCAAGCAGCA  | CGTTGGTCAA  |
| GATGCGGGTG | AGATCCTGAA | GTCCATCGGT  | GTCGAGAGCG | AAACCCGTCT  | GGCGGTGATG  |
| GTTGTGGAGA | ATGATCATCC | TCTGGTTCAC  | GTCGAGCAGA | TGATGCCGGT  | GCTGCCGGTT  |
| GTGCGTTGCG | CGAATATTGA | CGAGGCGATC  | GAGCGCGCAG | TTGCGGCCGA  | GCGTGGCAAC  |
| AAGCACAGCG | CGTGCATCTA | CAGCGGCAAC  | ATTGAGAATG | TTACCAAGTT  | CGGTTCGTGCA |
| ATTAACACCA | CCATCTTTGC | CCACAACGGT  | CCGACCTTGA | GCGGTGTCCG  | CTACAATGCA  |
| GAAGGTACCA | GCACCTTTAC | CATTGCAGGC  | CCGACTGGTG | AGGGTATTAC  | CAATGCGTAT  |
| AGCTTCACCC | GCGCACGTCG | CTTTGCCATT  | GCCCAGGGCG | GTCTGCGCAT  | TGTTTTAA    |

**ALDH5**

|            |            |            |            |            |             |
|------------|------------|------------|------------|------------|-------------|
| ATGTCCGTAA | ACGAGAAGAT | GGTCCAAGAT | ATTGTACAAG | AAGTCGTAGC | TAAAATGCAA  |
| ATTAGCTCCG | ACGTCAGCGG | CAAGAAGGGC | GTTTTTAGCG | ATATGAATGA | AGCAATCGAG  |
| GCGAGCAAAA | AGGCACAGAA | AATCGTGGCT | AAAATGAGCA | TGGACCAACG | CGAAGCCATT  |
| ATCAGCAAGA | TCCGTGAGAA | GATTAAGAG  | AATGCGGAAA | TTCTGGCGCG | TATGGGTGTT  |
| GAAGAAACCG | GCATGGGTAA | TGTTGGCCAC | AAAATTCTGA | AGCATCAGCT | GGTTGCGGAA  |
| AAGACCCCGG | GTACCGAGGA | CATCACGACG | ACGGCTTGGT | CTGGTGATCG | TGGTTTGACT  |
| TTGATCGAAA | TGGGCCCGTT | CGGCGTTATC | GGCGCGATCA | CCCCGTGCAC | TAACCCGTCT  |
| GAAACCGTGC | TGTGTAATAC | GATCGGTATG | CTGGCGGGTG | GTAACACCGT | TGTCTTTAAC  |
| CCACATCCAG | CCGCCATCAA | GACCAGCATC | TATGCGGTGA | ATCTGCTGAA | CGAGGCATCC  |
| GTCGAGGTTG | GTGGTCCGGA | GAATATTGCG | GTGACCGTCG | AGCACCCGAC | GATGGAAACC  |
| TCGGATATCA | TGATGAAGCA | CAAGGACATC | CATCTGATTG | CGGCTACGGG | CGGTCCGGGC  |
| GTTGTGACCG | CCGTCCTGAG | CAGCGGTAAA | CGCGGTATTG | GTGCGGGTGC | TGGCAACCCG  |
| CCTGCGTTGG | TCGACGAAAC | GGCCGACATT | CGCAAGGCCG | CAGAGGATAT | TGTGAACGGT  |
| TGTACCTTCG | ACAATAATCT | GCCGTGCATT | GCGGAGAAA  | AAATTGTGGC | AGTGGATTTCG |
| ATCGCAGATG | AGTGTGTGCA | CTACATGGTG | AGCGAGCAGG | GCTGTTACAT | GCTCAGCAAA  |
| GAAGAGCAGG | ACGCGCTGAC | CGAAGTTGTT | CTGAAAGGCG | GTCGTCTGAA | TCGCAAAATGC |
| GTGGGCCGTG | ACGCGAAAAC | GTTGCTGGGT | ATGATTGGTA | TCACGGTTCC | GGACAATATT  |
| CGTTGCATCA | CGTTTGAGGG | TCCGAAAGAG | CATCCGCTGA | TCGCGGAAGA | ACTGATGATG  |
| CCGATTCTGG | GCGTGGTTCG | TGCGAAAGAT | TTTGATGATG | CAGTGGAGCA | GGCAGTGTGG  |
| CTGGAGCACG | GTAACCGCCA | CAGCGCGCAC | ATTCATAGCA | AGAACGTTGA | CAACATCACC  |
| AAATACGCAA | AAGCCATTGA | CACCGCGATT | CTGGTCAAGA | ACGGTCCGAG | CTATGCAGCA  |
| CTGGGCTTCG | GTGGTGAGGG | CTATTGCACC | TTCACCATCG | CCAGCCGTAC | CGGCGAGGGT  |
| CTGACTAGCG | CGAGCACGTT | CACCAAGCGT | CGCCGTTGTG | TCATGACCGA | TTCTCTGTGC  |
| ATTCGTAA   |            |            |            |            |             |

**ALDH6**

|             |             |             |            |            |            |
|-------------|-------------|-------------|------------|------------|------------|
| ATGAAAGAGG  | GTGTAATTTCG | CTTGACATG   | GACATTAAGG | TAATTGAACA | GTTGGTAGAA |
| CAAGCGCTGA  | AAGAGATTAA  | GGCTGAGCAA  | CCTCTGAAAT | TCACCGCTCC | GAAACTGGAA |
| CGTTACGGCG  | TGTTCAAGAC  | GATGGACGAG  | GCGATCGCTG | CGTCTGAAGA | GGCACAGAAA |
| AAGCTGCTGT  | TCTCCAAAAT  | CAGCGATCGT  | CAGAAGTACG | TTGATGTGAT | TCGTAGCACC |
| ATCATTAAAGC | GCGAGAACCT  | GGAACCTGATC | AGCCGCCTGT | CTGTTGAAGA | GACTGAAATT |
| GGTGACTACG  | AACACAAATT  | GATCAAAAAT  | CGTCTGGCAG | CGGAAAAGAC | GCCAGGCACG |
| GAAGATCTGC  | TGACCGAGGC  | CATTACGGGT  | GATAACGGCT | TGACCCTGGT | TGAGTATTGC |
| CCGTTCCGGTG | TGATTGGTGC  | GATTACCCCG  | ACCACCAATC | CAACCGAAAC | GATCATCAAT |

|            |            |            |            |            |            |
|------------|------------|------------|------------|------------|------------|
| AACAGCATCA | GCATGATTGC | GGGTGGCAAC | ACGGTCGTCT | TTAGCCCGCA | TCCGCGTGCA |
| AAGAAGGTGA | GCCAGATGAC | CGTCAAGATG | CTGAACAAAG | CACTGATTGA | CAACGGCGCA |
| CCGCCGAATC | TGATCACTAT | GGTGGAAGAG | CCGTCTATTG | AGAACACGAA | CAAAATGATC |
| GACAATCCGT | CCGTTTCGCT | GCTGGTTGCT | ACCGGTGGCC | CGAGCATCGT | CAAGAAAGTC |
| CTGTCCAGCG | GCAAGAAAGC | CATCGGTGCC | GGTGCGGGTA | ATCCGCCAGT | CGTTGTGCAC |
| GAGACTGCCG | ACATTGATAA | GGCGGCCAAA | GATATTGTGG | ATGGTTGTAG | CTTTGACAAC |
| AATGTGCCGT | GCATTGCAGA | GAAAGAAGTC | TTTGCGGTTG | ACTCGATTTG | CGACTACCTG |
| ATCCACCACA | TGAAAGAGAA | TGGCGCGTAT | CAGATCACGG | ACCCTATGTT | GCTGGAGCAA |
| CTGGTTGCGC | TGGTTACGAC | CGAAAAGGGC | GGTCCGAAAA | CCAGCTTCGT | GGGCAAGAGC |
| GCTCGTTATA | TCCTGGATAA | GCTGGGTATC | ACGGTCGATG | CGTCCGTCCG | TGTGATTATC |
| ATGGAAGTGC | CGAAGGATCA | CCTGTTGGTG | CAAGAAGAGA | TGATGATGCC | GATCCTGCCG |
| GTGGTCCGTG | TTAGCGATGT | GGATACCGCA | ATCGAGTACG | CACACCAGGC | GGAGCATGGT |
| AATCGCCATA | CCGCGATGAT | GCACAGCAAA | AACGTTGAGA | AACTGAGCAA | AATGGCCAAG |
| ATTATGAAA  | CCACGATCTT | TGTTAAGAAC | GCGCCGAGCT | ATGCGGGCAT | TGGTGTGGT  |
| GGTGAGGGCT | ACACCACCTT | CACTATCGCA | GGCCCGACCG | GTGAGGGTCT | GACCAGCCCG |
| CGTACCTTCT | GTCGTAAGCG | CAAATGTGTT | ATGACGGACG | CCTTTAGCAT | TCGTTAA    |

### ALDH7

|             |             |             |            |            |            |
|-------------|-------------|-------------|------------|------------|------------|
| ATGGAACGCA  | ACTTGTCCGT  | ACTCTCGCAA  | ACTAATGACT | TGAAAATCAC | TAAACGCACG |
| GAAGGTGATA  | AAAGCAATAA  | CAAAGAAAGC  | TATCTGGGTG | TGTTTAAGAA | GGTCGAAAAT |
| GCGATACCA   | AAGCCATTTA  | CGCGCAGAAG  | AAACTGTCTC | TGTATTACAC | CAAAGAGGAC |
| CGCGAGCGTA  | TCATTAAGAG  | CATTCGTAAG  | GCCACCTTGG | AAAACAAAGA | GATCCTGGCC |
| AAGATGATCG  | TGGATGAAAC  | GCACATGGGC  | CGTTATGAGG | ACAAGATCCT | GAAGCACGAG |
| TTGGTGGCGA  | AATACACGCC  | TGGTACCGAG  | GACCTGATCA | CGACCGCGTG | GAGCGGCGAT |
| CAAGGTCTGA  | CGCTGGTCGA  | AATGAGCCCG  | TACGGCGTTA | TTGGCGCGAT | TACGCCGAGC |
| ACCAATCCTA  | CTGAAACCGT  | GATCTGCAAC  | AGCATTGGTA | TGATTGCAGC | TGGCGATTCC |
| GTCGTGTTTA  | ATGGTCATCC  | GGGTGCCAAG  | AAATGTGTTG | CGTTTGCAGT | CGACATGATT |
| AACAAAGCTG  | TTATCCGTGA  | GGGCGGTCCG  | GAGAACCTGG | TGACCACGGT | GGAGAACCCG |
| ACGATGGAGA  | GCCTGAATGT  | CATTATGAAG  | CACCCGTACA | TCAAGCTGCT | GTGTGGCACC |
| GGTGGTCCGG  | GTTTGATTAA  | GACCCTGCTG  | AACTCCGGTA | AGAAAGCGAT | TGGCGCAGGC |
| GCTGGTAATC  | CGCCGGTTAT  | TGTTGATGAT  | TCCGCCGACA | TCGACAAAGC | GGCAAAGAAC |
| ATCATTGAGG  | GTTGCAGCTT  | CGACAACAAT  | CTGCCGTGTA | TCGCGGAAAA | AGAGGTTTTT |
| GTGTTGCGAGA | ATGTGCGGAA  | TGATCTGATT  | CAGAACATGA | TCAAGAATAA | CGCAGTGCTG |
| ATTAATGAAA  | ACCAAGTCAG  | CAAACCTGCTG | GATCTGGTTC | TGCTGGAGCG | CAAGGATGAA |
| ACCCTGGAGT  | ATGCGATTAA  | CAAGAAATGG  | GTGGGTAAGG | ATGCGAAACT | GTTTCTGGAC |
| AAAATCGGCA  | TTAAGGCTAG  | CGATAACGTT  | CGTTGCATCA | TCTGCGAAGT | TGACGCGAAC |
| CACCCGTTTC  | TTATGACCGA  | ATTGATGATG  | CCGATTCTGC | CAATTGTCCG | TGTTAAGGAC |
| GTCGACGAGG  | CGATTGAATG  | TGCGAAAACC  | GCAGAGCAGC | GTAAACGCCA | TTCTGCATAT |
| ATGTACAGCA  | AGAATATTGA  | CAATCTGAAT  | CGTTTTGAAA | AAGAGATCGA | TACGACGATC |
| TTCGTGAAGA  | ATGCCAAAAG  | CTTCGCGGGT  | GTGGGTTTTG | GTGCAGAAGG | CTTTACGACC |
| TTCACCATCG  | CTGGCCCCGAC | CGGTGAGGGC  | ATCACCAGCG | CACGTAACCT | CACCCGTCAG |
| CGCCGTTGCG  | TTCTGGCCGG  | TTAA        |            |            |            |

### ALDH8

|            |             |            |            |            |             |
|------------|-------------|------------|------------|------------|-------------|
| ATGAATAACA | ATCTGTTTGT  | AAGCCCTGAA | ACGAAAGACT | TGAAACTGCG | CACTAATGTT  |
| GAGAACTTGA | AATTCAAAGG  | TTGTGAGGGT | GGCTCCACCT | ACATCGGCGT | GTTTGAGAAT  |
| GCAGAAACCG | CGATCGACGA  | GGCGGTTAAC | GCGCAAAAGC | GTCTGAGCCT | GTACTIONACC |
| AAAGAACAGC | GTGAGAAGAT  | TATCACGGAA | ATTCGTAAAG | TTACCCTGAA | GAATAAAGAG  |
| ATTCTGGCAC | AAATGATTCT  | GGAAGAAACG | CACATGGGTC | GTTATGAAGA | TAAGATCCTG  |
| AAGCACGAGC | TGGTCGCGAA  | GTATACGCCG | GGTACCGAGG | ACCTGGCAAC | CACCGCGTGG  |
| TCCGGTGACA | ACGGCCTGAC  | TGTGCTGGAG | ATGTCTCCGT | ACGGTGTTAT | TGGTGCATC   |
| ACCCCGTCGA | CCAATCCGAC  | CGAAACGATC | ATCTGCAACA | GCATCGGTAT | GATCGCGAGC  |
| GGTAACGCGG | TTGTTTTTCAA | CGGCCATCCA | GGCGCAAAGA | AATGTGTGGC | GTTTCGCGGTT |
| GATATGATTA | ACCGCGCGAT  | TATCAGCTGC | GGTGGTCCGC | GCAATCTGGT | GACCGCGATC  |
| AAGAACCCGA | CGATGGAGAG  | CTTGGATGCC | ATCATCAAGC | ACCCGGCGAT | TAAGCTGTTG  |
| TGCGGTACGG | GCGGTCCGGG  | TATGGTTAAA | ACCCTGCTGA | GCAGCGGTAA | GAAGAGCATT  |

GGTGCAGGCG CTGGTAATCC ACCGGTCATT GTGGATGACA CCGCCGACAT CGAGAAGGCT  
GGTAAGAGCA TTATCGAGGG TTGTAGCTTC GACAATAATC TGCCGTGCAT CGCGGAAAAA  
GAGGTGTTTCG TTTTTGAAAA CGTCGCAGAC GACCTGATTA AGAATATGCT GAAAAACAAT  
GCAGTCATTA TCAATAAAGA CCAAGTTAGC CGCCTGGTGA ATCTGGTCCT GCAGAAGAAC  
AATGAAACCA GCGAATATAC CATCAACAAG AAATGGGTCG GCAAAGACGC AAAGCTGTTC  
TTGGATGAGA TTGATGTCTGA GTCTAGCTCC GATGTTCGCT GCATTATCTG CGAAGTGGAT  
GCCGACCACC CGTTCGTCAT GACCGAACTG ATGATGCCGA TCCTGCCGAT TGTGCGTGTG  
AAAGATATTG ATGAGGCCAT CAAATATGCC AAAATTGCCG AGCAGAACCG TAAACATAGC  
GCGTACATCT ATAGCAAAAA CATTGAGAAC CTGAATCGTT TTGAAAAAGA GATTGATACG  
ACCATTTTTG TGAAGAACGC GAAGTCGTTT GCAGGCGTCG GCTACGGCGC TGAGGGTTTC  
ACGACTTTTA CCATTGCTGG CTGTACGGG GAGGGCATCA CGAGCGCCCG TAACTTCACC  
CGTCAGCGTC GCTGTGTGTT TGTTGGTTAA

**ALDH9**

ATGAATGACT TTAACATGAT CGATATCGAG AGCATTGTCA AAAACATTGT AAAAGAATTG  
ACCGGTAACG AGAAGGGCCA GGGTGCATC ACGACCGCGA CCGCTCCGAA AGAAGCCAAT  
CCGCTGGTTG ACATTGAGAA AAAGATTATG GGTTTTATGA ATACCCCGAC CATGCCTGTG  
GGTGAGTACG GCGTGTTCGA GGACATCAAC GACGCGATCG AACAAGCATG GCTGGCCGAG  
CAGGAGTATC GTAAAGTTGG CCTGGATAAG CGTACGGAGA TTATCGAGGC TTTCAAGGCA  
GAAGTGCGCA AAAATGTCTGA AGAGATCTCC CGTCGTACCT TTGAAGAAAC GGGTGTGGGC  
CGTTATGAGG ATAAGATCCT GAAAAACAAC CTGGCCTTGG ATAAGACGCC GGGTGTGGAA  
GATCTGGAAG CGGGTGTGAA AACGGGCGAT GGTGGTCTGA CCCTGTATGA GATGTCGCCG  
TTCGGTGTCA TTGGTGCAT CGCTCCGAGC ACCAATCCGA CGGAAACTAT TATCAATAAT  
GGCATTAGCA TGCTGGCGGG TGGAACACC GTCGTGTTCA GCCCGCATCC AGGTGCGAAA  
GACGTCAGCG TGTTTATCGT TCAACTGATT AACAAAGCGA TCGAGCGTAT CAACGGTCCG  
AAGAACCTGA TCGTTACGGT GAAGAACCCG AACATCGAAA GCACCAACAT TATGTTGGCG  
CATCCGAAGG TGAATATGAT TTGCGCGACC GCGGGTCCGG GCATCGTTAA GGTTGCTCTG  
AGCTCTGGCA AGAAGGCGAT TGGTGCCGGT GCGGGCAATC CGCCGGTGGT GGTGGACGAA  
ACCGCAGACA TCGAGAAAGC GGCAGTTGAC ATTATCGACG GCTGTAGCTT CGACAATAAT  
CTGCCGTGTA TCTGCGAGAA AGAGGTCATT GTTGTGACA AGGTTGCGGA CTACCTGAAA  
ACGTGTATGA GCAAGTATTG CGCACTGGAG ATTACGGACA AGAACATGTT GGCACAGCTG  
GAGAAGCTGG TGCTGACCGA AAATGGCACG ATCAACAAAC AATTTGTCCG CAAGAACGCA  
GATTACATTA TGAGCAAATT GGGTGTCAAT ATCGATCCGA GCATTGCGCT CATCTTTGCA  
GAGGTGGAAG CGAATCACCC GTTCGCCGTC GAAGAGCTGA TGATGCCTAT TCTGCCGGTC  
ATCCGTGTTT GCAACGTTGA TGAGGCCATC GATCTGGGTG TAGAGCTGGA ACATGGTAAT  
CGTCACACCG CGATCATGCA CAGCAAACAC ATTGATAATC TGTCCAAGTT TGCCAAAGCG  
GTTTACAGCA CGATTTTCGT CAAAAACGCG CCATCCTACG CAGGCATTG TTAGCGCGCA  
GAAGGCCACG GTACCTTCAC CATTGCCGGT CCGACTGGTG AGGGCCTGAC CAGCGCTCGC  
ACCTTCACTC GCAAACGTCG TTGCGTTATG GTTGACAAC TTTCTATTAA GTAA

**ALDH10**

ATGGAATTGG AAAGCAACGA ATTGAGCGTG ATTATTGAGA AGGTACTGAA AGAAATGAAC  
AAGAAAGAGT TTGGTAAGAA AGAGAGCGAC GGTATTTTCG ATACGATGGA CGAGGCCGTT  
GAGGCGTCTT ACGAGGCACA GAAGAAATAC AGCTCGTACT CCCTGGAGCA GCGCGAGAAG  
CTGATTCAAG CAATGCGTAA AGCGATCATG GATAATGCGA TGGAAGTCG TAATCTGTGT  
GTGAAAGAAA GCGGTATGGG TCGTGTGAC CACAAATACT TGAAACTGAA ATTGATTGTT  
GAAAAGACGC AAGGTACGGA AATCCTGCGT CCGGAAGTTT ACACCGGTGA CAACGGCCTG  
ACCCTGATTG AACATGGTGC TTTCCGGTGTT ATCGGTGCCA TTACGCCGAG CACCAATCCG  
GCAGCGACCG TCGCGTGCAA CTCCATCTGC ATGCTGGCGG GTGGTAATAC TGTGGTTTTT  
AGCCCGCACC CAGGTGCGCT GAATAGCTGC TTGACCATGA TCCGCATTCT GAATAAAGCA  
ATCAAAGAGG CCGGTGGTCC GGAGAACCTG ATTACCAGCG TGAAAGCACC TAGCATTGAG  
AATACCAATA TCATGATTAA CCACAAGCGT ATTCGCCTGG TCGTGGCTAC CGGCGGTCCG  
GGCATTGTGA AACTGGTGTG GTCCAGCGGC AAGAAGGCGA TCGGTGCGGG TGCCGGCAAT  
CCGCCGGTTG TTGTGGATGA AACCGCCGAC ATTCCGAAGG CGGCACGTGA CATCATTGCC  
GGCTGCAGCT TTGACAATAA TCTGCCGTGC ATCGCAGAGA AAGAAGCAAT TGTCTGCGAG  
AGCGTTTACG AAGAATTGAT TAAAGAGTTC AAGAAAAACC GCGTCTGTTA CGAGCTGACG

GACGAAGAGG CCGAAAAACT GGTGGCAAG GTCCTGAACT ATGATGAGAA GAACAAGAAG  
TATAGCATCA ACAAAAAGTT CGTCGGTAAA GATGCGAAAT ATCTGCTGGA GAGCATCGGC  
AAGGATGCGG GCACGGGTGT TGAGTGTCTG ATTTATCGTG CGGAGAATAG CCACCCGTTT  
GTCCAAGAAG AGCTGATGAT GCCGATCCTG CCGATCGTCA AGGTTAAGAA CGTGGACGAA  
GCGATCGAAA CCGCAGTGGA AGATGAGCAT GGCAATCGTC ATACGGCGAT GATGCACAGC  
AAAAACGTTG TGAACCTGAC GAAGATGGCG CGTGCGATCG ATACCACTAT CTTCGTGAAA  
AACGCACCGT CTTATGCGGG TATCGGCTTT GGTGGCGAGG GTCACACCAC CTTTACCATT  
GCTGGCCCAA CCGGTGAGGG CATCACCAAC GCCGTTACCT TCACGCGCCA GCGTCGTTGT  
ACGATGGTGG ACTCTTTTCG CATCGTGTA

**ALDH11**

ATGGAGATCG GCGCAAAAGA AATTGAGTTA ATCGTAAGAG AAGTTTTGGC AGGCATTGAA  
TCTCGTGGCC CGAAGCTGAG CTACATTCCG GCCCAAAGCG ACAACGGTGT TTTTGAGCGC  
GTGGAAGATG CCATTGGTGC GGCGCATACC GCGCAACGCG AATGGGTGCG GCATTACCGT  
GTTGAGGATC GCCGTCGCAT CATCGAGGCA ATCCGTATGA CGGCAAAGAG CCACGCGAAA  
ACCTTGCGGA AGCTGGTGTG GGAAGAAACG GGCATGGGTC GCTTTGAGGA TAAGATTCAG  
AAGCACATGG CAGTCATCGA GAAAACGCCA GGCGTTGAGT GCCTGACCAC GGACGCAATT  
TCCGGCGACG AGGGTCTGAT GATCGAAGAG TACGCTCCGT TTGGTGTAT TGGTGCATC  
ACCCCGTCCA CGAACCCAAC CGAAACCATC ATTAACAATA CTATCAGCAT GATTGCGGGT  
GGCAATGCGG TGGTGTTCOA CGTTCACCCT GGTGCGAAGA AATGTTGCGC GCACTGTCTG  
AAGCTGCTGC ATCAAGCTAT CGTCGAGAAC GGTGGCCCTG CCAACCTGAT TACCATGCAG  
AAAGAGCCGA CTATGGAAGC TGTGACCAAG ATGACCTCTG ACCCGCGTAT CCGTCTGATG  
GTCGGTACGG GTGGTATGCC GATGGTCAAT GCGTTGCTGC GTTCGGGCAA GAAAACGATC  
GGTGCAGGCG CTGGTAATCC GCCGGTTATT GTGGATGATT CCGCGGACGT GAGCCTGGCA  
GCGCGTGAGA TTTATCGCGG TGCCAGCTTC GATAACAATA TTCTGTGCCT GGCGGAAAAA  
GAGGTTTTTTG TGATGGAGAA AGCTGCGGAT GAAGTGGTTA ACAACCTGGT GAAAGAAGGC  
GCATATCTGC TGAATCCGAT GGAGCTGAAT GAGATTTTGA AATTCGCAAT GATCGAAAAG  
AACGGCAGCT GCGAGGTCAA CAAGAAGTGG GTCGGCAAGG ACGCCGGTCT GTTTCTGGAA  
GCCATTGGCG TCAGCGGCCA CAAAGACGTT CGTCTGCTGA TTTGTGAAAC CGACCGCAAT  
CACCCGTTTC TCATGGTTGA GCAGCTGATG CCGATTCTGC CGATCGTCCG TCTGCGCACC  
TTCGAAGAGT GCGTGGAGAG CGCGGTGGCA GCGGAAAGCG GCAATCGTCA CACGGCGAGC  
ATGTTTACGCC GCAATGTGGA GAATATGACC CGTTTTCGGTA AAGTTATCGA GACTACCATT  
TTCACCAAAA ACGGTAGCAC GTTGAAAGGT GTTGGTATCG GTGGTGAGGG TCATACCACC  
ATGACCATCG CGGGTCCGAC GGGTGAAGGT CTGACCTGTG CCCGTAGCTT TACGCGTCGT  
CGTCGCTGCA TGCTGGCCGA GGGCGGTTTT CGTATCATT AA

**ALDH12**

ATGGACGCAC AAAAGATTGA AAAACTGGTA CGCAAGATTT TGGAAGAGAT GGAAGAGAAA  
AAGAAACCGG CCGAGACTGA GTGTGAATGG GGTATCTTTG ACCACATGAA CCAGGCGATT  
GAAGCGGCGG AAATTGCGCA AAAAGAGCTG GTTCAACTGA GCCTGGGTCA GCGTGGCAAA  
CTGATTGAAG CAATTCGTAA GGCTGCGAAA GAGAACGCGG AGAAGTTTCG GCGCATGGCA  
GTCGATGAGA CTGGTATGGG CAAATACGAG GACAAAATCG TCAAAAATCT GCTGGCTGCC  
GAAAAGACCC CGGGTATCGA AGATCTGCGC ACCGAGGTGT TTAGCGGTGA CGACGGCTTG  
ACGTTGGTGG AGCTGAGCCC GTACGGCGTG ATCGGCGCTA TCACCCCGAC CACCAACCCG  
ACCGAAACCA TCATTTGTAA TTCCATTGGT ATGATCGCGG CAGGCAACGC AGTCGTCTTT  
TCCCCGCACC CGCGTGCAGG GAACACCTCT CTGTACGCAA TTAAGATTTT CAATCAGGCG  
ATCGTTGAGG CCGGTGGTCC GAAGAACCTG ATTACCACGG TAGCAAACCC GAGCATTGAA  
CAAGCCGAGA TCATGATGAA GCACAAAACG ATCAAAAATGC TGGTTGCTAC CCGTGGTCCG  
GGTGTGGTGA AGGCGGTTCT GAGCAGCGGT AAGAAGGCCA TCGGCGCTGG TGCGGGTAAT  
CCGCCTGTGG TTGTTGACGA AACTGCGGAT ATTGAGAAGG CAGCCAAAGA CATCATCGCA  
GGCTGCTCGT TCGATAACAA TTTGCCGTGC GTTGCCGAGA AAGAGGTGAT TGCAGTGAA  
AGCATCGCAG ATCGTCTGAT CGACTATATG AAAAAGCACG GTGCGTATGA GATTACCAAT  
AAAGAGCAGA TCCAGCAACT GACCGATCTG GTTGTGCGA ACGGCCATGC CAACAAAGAG  
TTCGTGCGTA AAGACCCGC GTACATCCTG AAGCATATCG GTATCAATGT TCCGCCGGAT  
ACCCGTGTGG CCATTATGGA AGTGGATGGC AAACACCCAC TGGTTACGGT TGAGCTGATG  
ATGCCGATCC TGCCAATTGT GCGTGTCAA AATGTTGACC AGGCAATCGA ACTGGCGGTC

GAAGTTGAGC ACGGCTTCCG TCATACGGCG ATTATGCATA GCAAGAACGT TGATCACCTG  
 ACGAAATTCG CAAAGGCGAT CCAGACGACC ATTTTTGTGA AGAATGCTCC TAGCTATGCG  
 GGCATTGGTG TGGGCGGTGA AGGTTACGCT ACCTTTACCA TCGCGGGTCC GACGGGTGAG  
 GGCCTGACGA GCGCGAAGGA TTTGCGCGCT AAGCGCAAAT GCGTCCTGGT CGACGCCTTG  
 TCTATTCGCT AA

**ALDH13**

ATGAACAAGG ATACGACGAT TAGCGAAACC GAGAACTTGA AATTTAAAAC GAACATTAAG  
 AATGCTGACC TGAAGAATTA CGAGAATAGC ACGAGCTATT CCGGCGTTTT TGAAGATGTC  
 GAGGTGGCGA TCAACAAGGC CATCACCGCG CAGAAAGAGT TCAGCCTGTA CTATACGAAA  
 GAGCAGCGCG AGAAAATCCT GACTGAGATT CGTAAAGCGA CCCTGAAAAA CAAAAAGATT  
 CTGGCGAAGA TGATTCTGGA CGAAACCCAC ATGGGCCGCT ATGAGGATAA GATCTTGAAG  
 CATGAACTGG TTGCAAAATA CACCCCGGGT ATTGAGGATC TGACTACCAC CGCTTGGTCC  
 GGCAGACAATG GCCTGACCGT TGTTGAAATG GCGCCGTACG GTGTGATTGG TGCAATTACG  
 CCTAGCACCA ACCCGACGGA AACCGTTATC TGCAATAGCA TCGGTATGAT CGCAGCGGGC  
 AATGCAGTGG TTTTCAATGG TCACCCGAGC GCAAAGAAGT GTGTGGCCTT TGCTGTTCGAT  
 ATGATCAATA AAGCAATCGT CAGCTGTGGT GGCCCCGAAA ACCTGATTAC CGCGGTGAAA  
 AACCCGACGA TGGAGAGCTT GGATGCGATT ATCAAGCATC CGGAAATCAA ACTGCTGTGT  
 GGTACCGGTG GCCCAGGTAT GGTGAAAACC CTGTTGAACA GCGCAAGAA AGCCATCGGT  
 GCGGGTCCCG GTAATCCGCC GGTGATTGTC GACGATACCG CGGATATCGA AAAGGCGGGT  
 AAAAAATCA TTAGGGGTTG CTCGTTGAC AATAATCTGC CATGCATCGC CGAAAAAGAG  
 GTTTTTGTCT TTGACAACGT TGCCGACAAT CTGATTGATA ACATGTTGAA GAATAACGCT  
 GTGATCATCA ATAAGGACAA AATCACCAAG CTGCTGAATC TGATCCTGCA GAAAAACAAT  
 GAAACGCAGG AGTATAACAT TAACAAGAAG TGGGTCGGCA AAGACGCGAA GCTGTTCCCTG  
 AATGAGATTG ACGTTGAGGC GCCGAGCAGC GTTCGTTGCA TTATCTGTGA GGTGGAACCG  
 GATCACCCGT TCGTGATGAC CGAGCTGATG ATGCCGATCC TGCCGATTGT CCGTGTAAAG  
 AACATTGACG ACGCGATCCA ATACGCAAAG ATCGCGGAAC AATCTCGCAA ACACAGCGCG  
 TACATTTACT CCAAAAACAT CGATAATCTG AATCGTTTTG AAAAAAGAGAT TGACACCACG  
 ATTTTCGTCA AGAACGCAA GTCTTTGCGG GGTGTGGGCT ATAACGCAGA AGGTTTCACG  
 ACCTTCACTA TTGCGGGTTG CACGGGCGAG GGTATTACCA GCGCTCGTAA CTTTACCCGT  
 CAACGCCGTT GCGTCCTGGC CGGCTAA

**ALDH14**

ATGGAATTTG AGGTAAACAA CATTGAAGAA ATTGTGGAAC TGATTATGAA GAAGATGGCA  
 GAGTCTAACA TCAGCACGGC GGGTAATTCC AAAAATGGTG TGTTGACAAA TGTGGACGAG  
 GCGATTGAAG AAGCGAAGAA AGCGCAGGCA ATTCTGTTCA GCAGCAAGTT GGAGCTGCGT  
 GAGAAGATCA TCGCTAGCAT TCGCGACACC CTGAAGAATC ACGTTACCGA GCTGGCAGAG  
 TTGGCAGTTA AAGAAACCGG TATGGGTCTG GTGCGGGACA AAGAGTTGAA AAACAAAATC  
 GCTATTGAAA AGACCCCGGG TTTGGAAGAT CTGAAGGCAT TCGCATTAG CCGTGATGAT  
 GGCCTGACGG TTATGGAAC GTCCCCGTAT GGTGTGATTG GCGCAATTAC GCCGAGCACC  
 AACCCGAGCG AAACGGTGAT CTGTAACAGC ATCGGCATGA TCGCCGCTGG TAATGCGGTG  
 ATTTTCGCAC CGCATCCGGG TGCCAAGCGC ACCAGCATCC GCACCGTCGA GCTGATCAAT  
 GAGGCGATCC GTAAGGTTGG TGGCCCTGAT AATCTGGTTG TTACCATCCG TGAGCCTAGC  
 ATTGAGAATA CCGAGAAAAT CATTGCCAAT CCAAATATCA AAATGCTGGT TGCTACCGGC  
 GGTCCGGGCG TTGTCAAAAC CGTTATGAGC AGCGGTAAGA AGGCGATTGG TGCCGGTGCG  
 GGCAATCCAC CGGTCCTGGT CGATGAAACC GCGGACATCG AGAAAGCCCG GAAAGACATT  
 ATTGCGGGCT GTAGCTTTGA CAACAATCTG CCGTGCACTG CCGAGAAAGA GGTGCTTGCA  
 GTTGATTCTA TCGTGAACCTA CCTGATCTTT GAGATGCAAA AGAACGGCGC GTATCTGCTG  
 AAGGACAAAAG AACTGATTGA AAAGCTGCTG AGCCTGGTGC TGAAGAACAA CAGCCCGGAT  
 CGTAAGTACG TCGGTCGTGA CGCCAAGTAT TTGCTGAAAC AGATCGGTAT CGAGGTGGGT  
 GATGAAATCA AGGTCATTAT CGTCGAAACG GACAAGAACC ACCCGTTCGC TGTGGAAGAG  
 TTGCTGATGC CGATTCTGCC GATCGTCAAA GTTAAAGACG CCCTGGAAGG TATCAAAGTC  
 GCGAAAGAGC TGGAGCGTGG CCTGCGTCAT ACTGCGGTGA TCCACTCTAA GAATATTGAT  
 ATTCTGACCA AATACGCGCG TGAGATGGAA ACGACGATCC TGGTGAAAAA CCGTCCGAGC  
 TACGCGGGTA TTGGTATCGG CGGTGAGGGC CACGTTACGT TTACCATTGC AGGCCCGACG  
 GGCGAGGGTC TGACCTCGGC GAAATCCTTC GCGCGCAACC GCCGTTGCGT ATTGGTGGGC

GGTTTTAGCA TTAAATAA

### ALDH15

ATGAATTTGG AAGCAAACAA CATGGACGAA ATTGTGGCAC TGATTATGAA AGAACTGAAG  
AAAACCGACA TTAAGGCGGG TTGTCAATCT TGTGAGAGCT TGAAAAACGG CGTTTTTCAGC  
AGCATGGATG AGGCCATTGC TGCAGCGAAG AAGGCGCAGG AGATCCTGTT CAGCTCCCGT  
CTGGAGATGC GTGAGAAGAT TGTGCGGAGC ATTCGCGAAG TGATGAAGGA CTATGTTGTG  
GAGCTGGCCG AGCTGGGTGT GAAAGAAACC GGTATGGGTC GTGCCGCAGA CAAAGCGCTG  
AAACACCAGG TGACGATCGA GAAAACCCCG GGTGTTGAGG ACTTGCGCGC CTTTGCCTTT  
AGCGGCGATG ATGGTCTGAC CGTCATGGAG CTGAGCCCGT ATGGCGTGAT TGGCGCGATC  
ACCCCAAGCA CCAATCCGTC CGAAACGATC ATCTGCAATA GCATTGGCAT GATCTCCGCT  
GGCAATTCTG TTGTTTTTCGC GCCACATCCG GGTGCGAAAC GCACGTCGAT TAAGACTGTC  
GAAATCATTG ACGAGGCCGT TCGCCGTGCA GGCGGTCCGG AGAACCTGGT GGTCACGATC  
GCGGAGCCGA GCATCGAAAA CACCAATCGT ATGATGGAGA ATCCGGATAT CAAGATGCTG  
GTCGCCACGG GTGGTCCGGG TGTGGTTAAA AGCGTCATGA GCAGCGGTAA GAAAGCGATT  
GGCGCAGGCG CAGGCAATCC GCCGGTGCTG GTTGATGAAA CCGCTGATAT CGAGAAGGCG  
GCACGTGACA TCGTCGCCGG CTGTAGCTTT GACAATAATC TGCCGTGCAT TGCTGAGAAA  
GAAGTCGTTG CGGTTGATTC TATCACCGAC TACCTGATTT TTGAGATGCA AAAGAACGGC  
GCGTATCTGA TTAAAGACAA ATCCGTGATT GACCGCCTGG TGGCGATGGT TCTGAAGAAC  
GGTAGCCCGA ACCGCGCGTA CGTTGGCAAA GATGCGAGCT ACATCCTGAA AGCACTGGGT  
ATTAACGTTG GCGACGAGAT TCGTGTGATC ATCACCGAAA CCGACAAGGA TCACCCGTTT  
GCAGTTGAAG AGCTGCTGAT GCCTATCCTG CCGATCATCC GTGTCAAGAA CGCGCTGGAA  
GGTATTGAGG TAAGCAAGAA ATTGGAACAC GGTCTGCGCC ATACCGCGAT GATTCATAGC  
AAAAACATTG ATATCTTGAC GAAGTACGCG CGTGATATGG AAACGACCAT CCTGGTCAAG  
AATGGCCCGA GCTTCGCAGG CATCGGTGTG GGTGGTGAGG GTCACACGAC TTTACCATT  
GCCGGTCTTA CGGGTGAAGG TCTGACCAGC GCAAAGTCTT TCGCTCGTAA TCGTCTGTTG  
GTGTTGGTTC GTGGTCTGAG CATTAAATAA

### ALDH46

ATGAATAAAG ACACCCTGAT TCCGACCACG AAAGATCTGA AAGTTAAGAC TAACGGCGAG  
AACATTAACC TGAAGAATTA CAAAGACAAT AGCAGCTGTT TTGGCGTCTT TGAAAATGTG  
GAGAATGCGA TTTCTTCTGC GGTGCACGCG CAAAAGATTC TGTCCTGCA CTATACGAAG  
GAGCAGCGCG AGAAAATCAT TACTGAAATC CGTAAAGCGG CCCTGCAGAA TAAAGAGGTG  
CTGGCAACCA TGATTTTGGA AGAAACGCAC ATGGGTGCGT ACGAAGATAA GATTCTGAAA  
CATGAGCTGG TCGCGAAATA CACCCCGGGT ACCGAGGACT TGACCACTAC CGCGTGGAGC  
GGCGACAACG GTCTGACCGT CGTCGAGATG AGCCCGTACG GTGTCATTGG TGCAATCACG  
CCGAGCACCA ACCCGACGGA AACGGTGATC TGCAACAGCA TTGGTATGAT CGCTGCAGGC  
AACGCGGTTC TTTTCAATGG CCACCCGTGT GCGAAGAAGT GTGTTGCCTT TGCTGTTGAG  
ATGATCAACA AAGCGATTAT CAGCTGTGGC GGTCCGGAGA ATCTGGTCAC GACCATTAAG  
AATCCGACCA TGGAATCCCT GGACGCAATC ATTAAGCACC CGTCGATTAA ACTGCTGTGC  
GGCACCGGTG GTCCAGGTAT GGTAAAGACG CTGCTGAACA GCGGTAAGAA AGCAATCGGT  
GCTGGCGCTG GTAACCCGCC TGTTCATCGT GACGATACGG CAGACATTGA AAAGGCGGGT  
CGTTCCATCA TTGAGGGCTG CAGCTTCGAT AACAACCTGC CGTGCATTGC GGAGAAAGAG  
GTTTTCTGTG TTGAGAATGT GGCAGACGAT CTGATCAGCA ACATGCTGAA GAATAACGCG  
GTAATCATTG ACGAGGACCA AGTTAGCAAG CTGATCGACC TGGTTTTGCA GAAAAACAAC  
GAAACCCAAG AGTACTTCAT CAATAAGAAA TGGGTGGGTA AGGATGCGAA GTTGTTCCTG  
GATGAGATCG ATGTGAAAAG CCAAGCAAT GTGAAATGCA TCATCTGCGA AGTTAATGCC  
AATCATCCGT TCGTTATGAC CGAACTGATG ATGCCGATCT TGCCGATCGT GCGTGTCAAA  
GATATCGATG AGGCCATTAA GTATGCGAAG ATCGCCGAAC AGAATCGTAA ACATAGCGCT  
TATATCTACA GAAAAACAT TGACAATCTG AATCGCTTCG AACGTGAGAT TGACACCACG  
ATTTTTGTGA AAAACGCAAA AAGCTTTGCG GGTGTGGGCT ATGAGGCGGA AGGCTTCACC  
ACCTTTACCA TTGCAGGTTT TACCGGTGAA GGTATCACGA GCGCCCGTAA CTTACGCGC  
CAACGTCGTT GTGTTCTGGC CGGCTAA

### E. gBlock sequences for ADH screening



## E1. Primary ADHs

### aldh46.x G1

ATCGCTTCGA ACGTGAGATT GACACCACGA TTTTTGTGAA AAACGCAAAA AGCTTTGCGG  
GTGTGGGCTA TGAGGCGGAA GGCTTCACCA CCTTTACCAT TGCAGGTTCT ACCGGTGAAG  
GTATCACGAG CGCCCGTAAC TTCACGCGCC AACGTCGTTG TGTTCTGGCC GGCTAATCTA  
GATGAACAAC TTCCGTTTCT GCACCCTACC GAATTACTAG TATCGATGAT AAGCTGTCAA  
ACATGAGCAG ATCTGAGCCC GCCTAATGAG C

### ADH1 G1 (Accession No. B6YQP9\_AZOPC)

CGAGCGCCCG TAACTTCACG CGCCAACGTC GTTGTGTTCT GGCCGGCTAA TCTAGACTCG  
CCATATCCGA CCCACCCAAG GACAACCTAT ATGAACAAC TCCGTTTCTG CAGCCCTACC  
GAATTCATTT TTGGTAAAAA CACCATCTGT AAAGTGGCTC AGCTGGTTAA ACAGTATGGT  
GGCTCTAAAG TTCTGATCCA TTACGGCAAT AAATCTGCGA AAAAACTGG TCTGCTGACC  
CAGATCGAGA ACTGCTTCCA GAACGAATTT ATCGAATATG TCAAACCTGGG TGGTGTTCAG  
CCGAACCCGA TCGACGAACT GGTCTACAAG GGTATCGAAC TGGGCCGTAA AGAAAAAGTT  
AACTTCATCC TGGCTATCGG TGGCGGTAGC GTTATCGACT CTGCTAAAGC AATCGCTGCG  
GGCATTCTGT ACAACGGTGA TTTCTGGAAC TTTTTCGAAG GCATCGTTAC CATTAAACCAC  
GCCCTGCCAA TTGCAACTGT TCTGACCCTG CCTGCTGCGG GCTCTGAGGG TTCTCCGAAC  
ACTGTCATCA CGAAAACCGA CGGTATGCTG AAACGTGGCA TCGGTTCTTC CTTTCATCCGC  
CCAGTCTTCT CTATCATGGA TCCAGTGCTG ACGTTCACCC TGCCGACCTG TCAGACCGTT  
TATGGCATCG CAGATATGAT GGCCACGTT ATGGA

### ADH1 G2 (Accession No. B6YQP9\_AZOPC)

ACCTGTCAGA CCGTTTATGG CATCGCAGAT ATGATGGCCC ACGTTATGGA ACGCTACTTC  
ACCCAGACCC AGGGTGTGGA TATTACTGAC CGCATGTGCG AGTCTATCCT GCTGTCTATT  
ATCCACAGCG CGAAAACCTCT GATTTCGCGAA CCGGAAAAC ACGACGCTCG TGCCAACATC  
ATGTGGGCCT CCACGATCGC GCACAACGGT ATCTGCGGCG TGGGTCGTGA AGAAGACTGG  
GCGACCCATG CTCTGGAACA TGAAGTGTCC GCGCTGTATA ACATCGCACA CGGCGCCGGC  
CTGGCTGTGA TGTTTCCGGC GTGGATGCAA TACGTATACA CCGCGGGTAT CGACCGTTTC  
GTGCAATTTG CTACCCGCGT TTGGAACATC GAAAACATCG GCTCTAAAAA AGAGATTGCC  
CTGAAAGGTA TCCACGCTCT GAAAGACTTT TTCTCCTCCA TCAAACCTGCC AATCAACTTT  
GAACAGCTGG GCGCACAGAA AAGCGATATT GACAAACTGA TTGACACCCT GAAAATTAAC  
ACCAAAGGTA AACTGGGTAA CTTCTGCTG CTGGACATGA ACGATGCTCG TGCAATCTAC  
GAAATTGCTG CTAAGCGTTA AACTAGTATC GATGATAAGC TGTCAAACAT GAGCAGATCT  
GAGCCCGCCT AATGAGC

### ADH2 G1 (Accession No. A0RQF7\_CAMFF)

CGAGCGCCCG TAACTTCACG CGCCAACGTC GTTGTGTTCT GGCCGGCTAA TCTAGAAGAT  
TAAACTCTAA GCGAGGAATA CATGGTCAAC TTTTCTACT GCAATCCAAC CCGTATCGAA  
TTCGGCAAAG GTAAAGAAAA CTCCATCGGT GAATACCTGA ACGAATATGG CGAAAAAAC  
GTGCTGATTC TGTTTCGGCTC CGACCGCGTT AAAAAAGACG GTCTGTTTGA CAAAGCGACT  
GCGTCCCTGA CCAAATTCGG CATCAAATTC TCCGAACTGG GTGACATTGT GAGCAATCCA  
GTACTGTCCA AAGTTTATGA AGCTATCAAC CTGGCCCGCA AAAACGGCGT GGATAGCGTT  
CTGGCGATCG GCGGTGGTTC TGTCCTGGAT ACTGCCAAT CCGTAGCAGC CCGTGCAAAA  
TACGACGGTG ACGTTTGGGA TCTGTTCTG GCCAAAGCTC CGATTAAAGA TGCTCTGATG  
GTTTTCGATA TTATGACCCT GGCTGCAACT GGTAGCGAAA TGAACAGCTT CGCCGTTGTC  
ACCAACGAAG ACATAAAGA GAAAATCTCT ATCACCTCT CCCTGGTGAA CCAAAGTA  
AGCGTAATCA ATCCGAACT GATGAAATCC ATTTCTAAAA ACTACCTGGT GTACTCCGCG  
GCCGACATCA TCGCGCATTC TATCGAAGGC TACCTGACCG CAACTCATCA CCCGAAATT  
ATCTCCAAAC TGGTTGAAGC GAATATCTCC

### ADH2 G2 (Accession No. A0RQF7\_CAMFF)

CAACTCATCA CCCGAAATT ATCTCCAAAC TGGTTGAAGC GAATATCTCC ACTATTATTA  
 AAACGACCGA AATCCTGCTG GCTGACCCAG ACAACTACGA CGCACGTGCG GAATTTGCGT  
 GGGCAGCAAC TTGTGCTCTG AACGGCACCA CTTACGTTGG CGTTGGTGGT TACTCCTACC  
 CGAACCACAT GATCGAACAT TCCATCTCTG CACTGTACGG TGTACCGCAT GGTGCGGGTC  
 TGTCCGTAGT AATGCCGGCA TGGATGAAAT GGTATAAGGA CAAAAATGAA GCCCAGTTCT  
 CTCGCTTCGC TAAAGTAATC TTCGGTAAAA ACAGCGCTGA TGAAGGTATT GAAGCCCTGA  
 AGACGTGGTT CAAAAAATC GGCACCCCGA CCAAACCTGCG CGACTTCGGC CTGGACATGT  
 CCGTATCTGA CATCACCCT GCTGCGCTGC ATCACGCTAA AGCATTGGT ATCGCTGATA  
 TCTATACCAA AGACGTTCTG GAAGAAATC TGAACCTGGC TTACTAACT AGTATCGATG  
 ATAAGCTGTC AAACATGAGC AGATCTGAGC CCGCCTAATG AGC

**ADH3 G1 (Accession No. G5F136\_9ACTN)**

CGAGCGCCCG TAACTTCACG CGCCAACGTC GTTGTGTTCT GGCCGGCTAA TCTAGAGATA  
 CCTTCCCTT AAGAGCGAGG TCATTATGAT TAACTTCGAC TATTGCGTGC CGACTAAAGT  
 TGTTTTCCGT CATGGTGTG AATCTAACGT TGGCAAATAC GTAAAAGAGT TCGGTGGTAC  
 CAAAGCGATG ATTCACTGGG GCGGTGACTA TGTTCCGCGAT ACGGGTCTGC TGGACCGTGT  
 CGAAAAATCT CTGTCCGCGG AAGGTATCGG CTACGTTGAG TTTGAAGGCG TCGTACCGAA  
 CCCCAGCCTG TCCACCGCTA AAGAGGCCCT GGCTCTGGCG AAACGTGAAG GTGTAGATTT  
 CCTGCTGGCT ATCGGCGGCG GTTCTGCAAT CGATAGCAGC AAAACCATCG CACACGGTCT  
 GCGAACGAT TTCGAGCTGG AAGACCTGTT CCTGGGTAAG GTAAGCACTG ACCGTATCGC  
 GGGCCTGGGT GCGATCTCTA CCCTGGCCGG CACCGGTTCT GAAACCTCTA ACTCTACTGT  
 TATCAACATC GATACGATGG GTGACGTCGA GCTGAAACGT AGCTACAACC ACGAATGTGC  
 CCGTCCGAAA TTCGCGATCA TGGATCCGGA ACTGACCTAT ACCGTTCCGG CATGGCAGAC  
 GGCCGCCGCT GGCTGCGACA TTATGATGCA CACTA

**ADH3 G2 (Accession No. G5F136\_9ACTN)**

TTCCGGCATG GCAGACGGCC GCCGCTGGCT GCGACATTAT GATGCACACT ATGGAACGTT  
 TCTTCACTAC CGTTTCTCAT ACGGAAGTGA TCGATCAAAT GTCCCTGGGT CTGCTGCGTG  
 CTGTCAAAC CGCGATTCCA CTGGCTCTGG CTGAGCCGGA TGAATATGAT GCACGCGCCA  
 CCCTGCTGTG GCGGGGCTCT CTGTCTCACA ACGGTCTGAC CGGCACCGGT CAGCAGGGTG  
 ACTTGCATC CCATGCAATT GAACACGAAA TGGGTGCTCT GTACAACCTGC ACCCACGGCG  
 CAGGTCTGTG CGCGATGTGG TCTTCCCTGGG CTCGTTATGT CATTGATGTG CGTCCGGAAC  
 GTTTCGCACA GTTCCGTGTG GAAGTCTTCG GTGTGGTAAA CGACTACTCT GATCCGAAAG  
 GTACCGGTCT GCGCGGTATC GAGGCTTGGG AAAAATTCTG CAAATCTGTG GGTATGCCGG  
 TACGTATGAG CGAACTGGCA ATCAACCCGA CTGATGAGGA GATCCGTCAT ATGGCTCAGG  
 GCGCCATTGA CGCCCGTGGT GGTGATCATT GCGGTTCTTT CATGGAAGT GGTGTTGATG  
 ACGTCGTAAA AATTCTGGAA ATGGCCCCTG AACTAGTAT CGATGATAAG CTGTCAAACA  
 TGAGCAGATC TGAGCCCGCC TAATGAGC

**ADH4 G1 (Accession No. B1C7G7\_9FIRM)**

CGAGCGCCCG TAACTTCACG CGCCAACGTC GTTGTGTTCT GGCCGGCTAA TCTAGACCCA  
 CCTTCCAAA CTCCAGAGG TATTCATGCA GAAATTTGAC TACTATACTC CGACCAAAGT  
 TATCTTTGGC AAAGGCACCG AAAACAAAGT GGGTAAAGAG ATGAAAAAAG ACGGTGCTAA  
 GAAGGCTTAT ATCGTTTACG GCGGCAAATC CGCGAAAAAA AGCGGTCTGC TGGACAAAGT  
 GGAGAAATCT CTGAAAGACG AAAACATTGA ATACAAAATG ATCGGTGGCG TGAAACCGAA  
 CCCTCGCCTG TCTCTGGCTC GCGAAGGTGT GAAGGAAGCG AAGGAATTCT GTGCCGATTT  
 TATTCTGGCG GTTGGTGGTG GCTCTGTTAT CGATACCGCA AAAGGCATCG CACATGGCGT  
 AGCAAACCTT GACACTGACA TCTGGGATTT CTGGGAAGGT AAAGCCAAGG TTGAAAAATC  
 CCTGCCTGTT GCGGTTATCC TGACCATTTT TGCTGCGGGT TCTGAAATGA GCAACTCCGC  
 GGTGCTGACG AATGAAGAAA CTGGCATGAA GCGTGGCCTG TCCACCGATT TCAACCGTCC  
 GAAATTGCGC ATCATGGACC CGGAACTGAC CTACACGCTG CCGGATTACC AGGTTGGTTG  
 CCGTGTGGTA GACATCATGA TGCACACCAT GGATC

**ADH4 G2 (Accession No. B1C7G7\_9FIRM)**

ATTACCAGGT TGGTTGCGGT GTGGTAGACA TCATGATGCA CACCATGGAT CGTTATTTCA  
 CTGACCTGAC TGATTGCCAG AACGATCTGA CCGATGAAAT CGCAGAGTCT CTGCTGCGTA  
 TCGTTATCAA AAACGGTTCGT GTAGCTTGCA AGAATAAAGA AGACTACCAC GCTATGAGCG  
 AAATCATGTG GGCAGGTTCC CTGTCCCATA ACGGCCTGAC CGGTCTGGGC GCCCCGATGG  
 ACTTTGCAAC GCACCGCCTG GGTCACCTCT TGTCCGCGAA ATTTGATGTT GCACACGGTG  
 CGTCCCTGTC CGCCATGTGG CCGCACTGGG CTAACTACGT AAAACATAAA GACATCGAGC  
 GTTTTGACAG CTATGCGCGT AACGTTTGGG GCATTACGGA AGGCACCGAT GAAGAAGTGG  
 CTGATAAAGG TATTGAAGCG ACCGTGGAAT TCTTCAAATC TATCAACATG CCGACCTGCT  
 TTAGCGAACT GGGTATCGGC ATCCAGGATG AGGATGGCCT GCGTGAGCTG ACCAACCCTT  
 GCTTCTACGT GAAAGGTACC AAAGTAGGTA AACTGATTCC GCTGACCGAA GAAGATATTT  
 ACCCGATCTA TGTATCTGCG AACAAATAAA CTAGTATCGA TGATAAGCTG TCAAACATGA  
 GCAGATCTGA GCCCGCCTAA TGAGC

**ADH5 G1 (Accession No. YUGK\_BACSU)**

CGAGCGCCCG TAACTTCACG CGCCAACGTC GTTGTGTTCT GGCCGGCTAA TCTAGATAAC  
 ACACCTATCA AGAAATAATT CAGAGGTCCC AATGGAAAAC TTCACCTACT ACAACCCGAC  
 CAAACTGATC TTCGGCAAAG GCCAGCTGGA ACAGCTGCGC AAAGAATTTA AACGTTATGG  
 TAAAAACGTT CTGCTGGTTT ATGGTGGCGG CTCCATCAAA CGCAACGGTC TGTACGACCA  
 GGTCACCGGC ATCCTGAAAAG AGGAGGGCGC GGTGGTTCAC GAACTGAGCG GTGTTGAACC  
 GAACCCGCGC CTGGCTACCG TGGAAAAGGG CATTGGTCTG TGCCGTGAAC ACGATATCGA  
 TTTTCTGCTG GCCGTCGGTG GTGGCTCTGT CATTGACTGC ACCAAAGCAA TCGCGGCGGG  
 TGTAATAATC GATGGTGACG CTTGGGATAT CTTTTCCAAA AAGGTTACCG CCGAAGACGC  
 TCTGCCGTTT GGCACCGTAC TGACCCTGGC CGCTACCGGT TCCGAGATGA ACCCGGATTC  
 CGTTATCACC AACTGGGAAA CTAACGAAAA ATTCGTCTGG GGTTCACACG TTACCCACCC  
 GCGCTTCTCT ATCCTGGACC CGGAAAACAC CTTTACCGTA CCGGAAAACC AGACAGTGTA  
 TGGCATGGTT GACAT

**ADH5 G2 (Accession No. YUGK\_BACSU)**

AAACACCTTT ACCGTACCGG AAAACCAGAC AGTGTATGGC ATGGTTGACA TGATGTCTCA  
 CGTTTTCGAA CAGTATTTCC ATAACGTAGA AAACACTCCG CTGCAGGATC GTATGTGCTT  
 TGCTGTGCTG CAGACCGTCA TCGAAACGGC TCCGAAGCTG CTGGAAGACC TGGAAAATTA  
 CGAACTGCGT GAAACCATTG TGTACGCGGG TACCATTGCG CTGAACGGTA CTCTGCAGAT  
 GGGTTACTTC GGTGATTGGG CGTCTCACAC TATGGAACAC GCAGTGAGCG CAGTGTACGA  
 CATTCCGCAC GCGGGCGGTC TGGCGATTCT GTTTCCGAAT TGGATGCGTT ACACGCTGGA  
 TACTAACGTG GGTGTTTTCA AAAACCTGAT GCTGAACATG TTCGATATCG ATACGGAAGG  
 CAAAACCTGAC AAGGAGATCG CCCTGGAAGG TATTGACAAA CTGTCCGCAT TTTGGACGAG  
 CCTGGGCGCG CCGTCCCGTC TGGCCGATTA CAACATCGGC GAAGAAAAAC TGGAGCTGAT  
 CGCAGACATT GCTGCGAAAAG AGATGGAGCA CGGCGGCTTC GGCAACTTTC AGAAGCTGAA  
 TAAAGACGAC GTACTGGCGA TCCTGCGTGC ATCTCTGTAA ACTAGTATCG ATGATAAGCT  
 GTCAAACATG AGCAGATCTG AGCCCCCCTA ATGAGC

**ADH6 G1 (Accession No. A8SGI9\_9FIRM)**

CGAGCGCCCG TAACTTCACG CGCCAACGTC GTTGTGTTCT GGCCGGCTAA TCTAGACCTC  
 TCCCGGTACG ATAATAAGGA GGCATCAATG AACAACCTCC TGTTTCGAAA CAAAACCAA  
 GTATACTTCG GTAAGGGTGG TGTTAAAGAA TATCTGGGTT GTCTGCTGGA ACATTATGGT  
 GACACCGTTA TGCTGGCCTA TGGCGGCGGC TCCATCAAAC ATAACGGTGT ATATGATGAA  
 ATTTGTGGCA TCCTGAACGC CGAAGGCAAA CGCATCGTTG AATTCCCAGG TATCATGCCG  
 AACCCGACGT ATGCTAAGGT GCAAGAAGGT GCTAAACTGG CGCGTGAAAA CCACGTAGAC  
 CTGATCCTGG CCGTTGGCGG TGGTAGCGTT TCCGACTGCT GCAAAGTTGT GAGCGCGCAG  
 GCAAAAAGTAG ATGAAGATCT GTGGGAGCTG GAAAACACTA AACACACTCG CCCGACTGCA  
 TTCATTCCGC TGGGTACCAT TGTGACCGTT TTTGGTACTG GCAGCGAAAT GAACAACGGC  
 GCTGTAATCA CCCACGAGGA GAAAAAATT AAAGGTGCTC TGTGGGGCGC ACAGGCGGAC  
 TTTGCATTCC TGGACCCGAC TTATACTCTG TCCGTGCCGA TGAAACAGGT TATTAGCGGT  
 GCGTTCGACA CTCTG

**ADH6 G2 (Accession No. A8SGI9\_9FIRM)**

ACTCTGTCCG TGCCGATGAA ACAGGTTATT AGCGGTGCGT TCGACACTCT GAGCCACGCT  
ATGGAACCTT ATTTTCGGCAA ACCGGATGAG AACAACTCTGT CCGACGACAT CAACGAAGCG  
GTGATGCGTT CCGTTATCCG TAACATTCGT GTGCTGCTGA CCGACAAGGA TAACTACGAA  
GCACGCTCCG AACTGACCTG GGCTTCTGCG ATGGCAGAAA ACGGTATTCT GAAAATCGGT  
AAAGTAACTG ACTTTCAATG CCACATGATC GAACATCAGC TGGGCGCATA CACTAACTGT  
AACCACGGCG CTGGTCTGGC GGTTATCCAC CCGGTTCTGT ATCGTCATCT GCTGCCGGCG  
AACACCGCAC GTTTTCGCGCG TTTTCGCTCAA AACGTTTGGG GCATCGATCC AGCAGGTAAA  
TCCGAACTGA AACTGGCGCA GGCGGGTGTG GAAGCTCTGG CGGCGTTTAT CAAGGAAATT  
GGCATGCCGA CTACCTTCGC TGAGCTGGGC GTTCCGGCGG ACACCGATCT GAAAGCCGTA  
GCTGACTCTA CCGTCCTGAC CGGTGGTTGT TGCAAAAAAC TGTCTCGTGA AGAGCTGCTG  
GACATCCTGA ACGAATGTAA ATAACTAGT ATCGATGATA AGCTGTCAA CATGAGCAGA  
TCTGAGCCCG CCTAATGAGC

**ADH7 G1 (Accession No. E2SQ66\_9FIRM)**

CGAGCGCCCG TAACTTCACG CGCCAACGTC GTTGTGTTCT GGCCGGCTAA TCTAGATATC  
CAGCCATTCC CCAGGAGAAA CCACTATGCG TAACTTTACC TACCACAACC CGGTCCGTAT  
CCTGTTCCGGC GATCATGCTC TGGACCAGCT GCCGGATCTG TTCCGTGAAT TCCACGTGTC  
TAACCTGCTG CTGGTGTATT CTGGCGATTT TATTAAGAA CTGGGCATCT GGGATGCCGT  
TTACAACGCT TGCGCGGAAA ATGGTATCGC ATTTTACGAA GAAGGTGGTG TAGTCCCGAA  
CCCAGAAAATT GAACTGGTTC GTGAACTGGT CGCACTGGGC AAAAAAAAAA AGATCGACTT  
CATTCTGGCT GTAGGCGGTG GTTCTTCCAT CGACACTGCT AAGGCTGTTG CCGCAGGCAT  
CCCGTACGCC CACGACGTGT GGGACTTCTT CGAATACACT GCGGTTCCGG AAACGGCGGT  
GCCGATCGGT GTAATCACCA CGATCCCAGC GTCTGGTTCC GAATGTTCTA ATTGCAGCAT  
TATCTCCAAC GGTCTGCACA AATGCGGTAT TGAGTACGAT TGCATCATCC CACAGTTTGC  
CATCATGAAC CCGGAGTACA CCCGTACCCT GCCTGCGTAC CAGACCTCCG CAGGCATCGC  
GGACATTCTG TCCCA

**ADH7 G2 (Accession No. E2SQ66\_9FIRM)**

GTACCCTGCC TGCGTACCAG ACCTCCGCAG GCATCGCGGA CATTCTGTCC CACATGCTGG  
AACGCTACTT CACGAACACT ACTCACGTTG ACACCACCGA CTACATGCTG GAAGGTACCA  
TGCAGGCTCT GATGGTCAAC GCGCGCCGCC TGATGAAACA GCCGGATGAC ATCCACGCGC  
GCGCAGAAGT TCAGTGTCTG GCTTTCCTGG CACATAACAA CTGCTGGAC ATCGGTGCGG  
AATCTGACTG GGGCCCGCAT CGTATTGAAC ACGAACTGTC CGCACAGTAC GGCATTACCC  
ACGGTGAAGG TATGGCAGTT GTAACCATCG CGTGGGCACG CTACATGGCT GCACACCACC  
CGGACAAACT GGCACAGCTG GCCTCCCCTA TCTTCGGTGC TGATCCGTTT GTACATTCCA  
AAGAGGATAT GGCACAGCTG CTGGCTGACC ACCTGGAAGA GTTTTTCAA TCCCTGCACC  
TGAAAACCAC CCTGCACGAA ATGGGTATCG ACGATAACCA CTTTGAAGAG ATGGCAACC  
GTGCCACCAA TAACGGTAAG GATTGTGTTG GCCACTACGT GGCTCTGAAC AAACAGATCT  
TTATCGACAT TCTGCACATG GCCCTGTAAA CTAGTATCGA TGATAAGCTG TCAAACATGA  
GCAGATCTGA GCCCGCCTAA TGAGC

**ADH8 G1 (Accession No. E1QYZ8\_OLSUV)**

CGAGCGCCCG TAACTTCACG CGCCAACGTC GTTGTGTTCT GGCCGGCTAA TCTAGAGACT  
TAGTAGTCAC ACGCAAGAGG AGGATTCCAG TATGTACGAC TTCATGTTCC ACGTACCGAC  
CAAGATCTAC TTCGGCCGCG GCCAGATCTC TCACCTGGCA GAACTGTCTG ATTTTGGCCA  
GAAAGCGCTG CTGGTTTACG GTGGCGGCGAG CATCAAACGT AACGGCATT TACGCAAGC  
GATTTCGTATT CTGACCCATG CCGGTATCGA AGTTGTAGAA CTGAGCGGCG TTGAACCGAA  
CCCGCGTATT GAAACCGTGC GTGCGGGTGT CGGTCTGTGC GCTCGCGAAG GTGTTGACAT  
GGTTCTGGCT ATCGGCGGCG GTAGCACCAT CGATTGCGCT AAAGTAGTTG CCGCCGGCGC  
GCGTTACGAT GCGGACCCGT GGGACCTGGT ACTGGACGGT TCTAAGGCGG CTTCCGCGCT  
GCCAATCTTT TCTGTGCTGA CCCTGTCCGC GACCGGTTCT GAGATGGATG CATTGCTGT  
CATCAGCGAT ATGAGCAAAA ATGAAAAGTG GGGTACCGGC GCAGAGTGTA TGAAACCGAC  
CATGTCTGTG CTGGACCCGT CTTACACCTT CAGCGTGAGC CCTAAACAGA CCGCGGCTGG  
CACCGCCGAT ATGAT

**ADH8 G2 (Accession No. E1QYZ8\_OLSUV)**

ACACCTTCAG CGTGAGCCCT AAACAGACCG CGGCTGGCAC CGCCGATATG ATGAGCCATA  
CCTTCGAATC TTATTTTTCC ATGGACGAAG GTGCGTACGT CCAGAAGCGT CTGGCAGAAG  
GTCTGCTGGG CACTATGATC CACTTCGGCC CGATTGCCCT GGCACATCCG GACGACTACG  
ATGCGCGTGC GAACCTGATG TGGGCGGCTT CTCACGCAAT TAACGGCCTG GTTTCTGATG  
GTTGTAGCCC TGCCTGGTGC GTTCACCCGA TGGAACACGA GCTGTCTGCA TTCTACGATA  
TCACTCACGG CGAGGGTCTG GCGATCCTGA CGCCGGCATG GATGGAGCAC GTTCTGGATG  
CTCAGACTGC TCCTCTGTTT GCTGCATACG GTTGCAACGT ATGGGGTCTG TCCGGCGTAG  
ATGACATGAA AGTTGCTCGT GAAGCAATCA GCCGCACTCG TCGTTTTTTT GTTGAAGCTA  
TGCATCTGCC GGCAACCCTG CGCGAGGTCG GCATTACCGA TGAAAAAAC TTCGAAGTTA  
TGGCTCGCAA AGCCGCCGAT GGTTGCAAAG GCAGCTTCGT TGCCTGTCT CAGGACGACA  
TCGTAGAAAT CTACCGTGCT GCTCTGTAAA CTAGTATCGA TGATAAGCTG TCAAACATGA  
CGAGATCTGA GCCCGCCTAA TGAGC

**ADH9 G1 (Accession No. F5X0G1\_STRG1)**

CGAGCGCCCC TAACTTCACG CGCCAACGTC GTTGTGTTCT GGCCGGCTAA TCTAGACTCC  
TTCAATAAGC CCAGGGAGGA TTAAAGCATG AATGATTTCC AGTTTTAGAA CACTACCAAA  
GTTTTATTTG GTAAACATCA GCTGCAACAC CTGCACCAGG AAGTGCTGAA ATACGGTCAG  
AAAGTGCTGA TCGCTGATGG CGGTGAATTC ATCCGTCAGT CTCCGCTGTA TGCTCAAGTT  
CTGAAAGAAC TGACGGACAA CGGCATCCAG ATCTTCGAAC TGGGTTCTGT GGAGCCGAAT  
CCGCGCCACA CCACCGTTAA CCGCGAAGTA AAAGTGTGTA AAGGCAACAA CATCCAGACC  
GTACTGGCCG TTGGCGGGCG CTCCACGATT GACTGCTGTA AAGCGATCGC GCGGACCTCT  
TGCACCGACG AAGACGACGT TTGGACCCTG ATCGAAAAAC GTGAACCGAT CAACCAAGCG  
CTGGCGGTTA TCGCTATGCC GACCATCGCG TCCACGGGCT CTGAAATGGA CAAGAGCTGC  
GTGATTGCCA ACGAAGAGCT GCACCTGAAA AAGGGTCTGA ACGGCGAAGC TATCCGTCCG  
AAAGCGGCTT TTCTGAACCC GGAAAAACCC TTCACCGTTC CGGCACGTCA GACCGCGTGT  
GGTGGCTTCG ACATCATGAT GCATCTGCTG GATAT

**ADH9 G2 (Accession No. F5X0G1\_STRG1)**

CGTCAGACCG CGTGTGGTGG CTTTCGACATC ATGATGCATC TGCTGGATAT GAACTATTTT  
GTAGACTCTG ATAAATATCC GCTGCAGTTC AATGTGGTAG AAACCCTGCT GCGCACTATT  
CGTGAGCAGC TGCCGATCGC GCTGCGTGAG CCGGAAAAC ACGAGGCTCG TGCGACCCTG  
CTGTGGGGTG CTTTCTGGGC GCTGAACTCT TTCTGTACCT CCGGTTTCAA AACCGCACCG  
AGCAACCACG GTCTGGAACA ATTCTCTGCG TTCTACGATC AGACGCATGG TCTGGGTCTG  
GCTCTGGTGG TTACCAAATG GATGACCTAC CTGCTGGAAA AGGACCCGAC CGTGGCACCA  
GATTTTCGCTC GTCTGGGCAC CAATGTGCTG GGCTGTCAGC CAGTTGACGA TGTGATCGAG  
GGCGCAAAA ACGCTATCAA AGCCTTTGAC GCATTATTG TGAATGACCT GGGTCTGCCG  
CGTACCATGA TGAAAATCGG TCTGAACGAC TCTAAGCTGA GCGAGATGGC TCATGCTGCG  
GTAACCGGTT ATGGCGACGG CACGCTGAAG GGCTACCGTG AACTGACTGA AGCGAACTGC  
CTGGCCATTT ATAAATGTG CCTGTAAACT AGTATCGATG ATAAGCTGTC AAACATGAGC  
AGATCTGAGC CCGCCTAATG AGC

**ADH10 G1 (Accession No. E6W4G5\_DESIS)**

CGAGCGCCCC TAACTTCACG CGCCAACGTC GTTGTGTTCT GGCCGGCTAA TCTAGAGCCT  
TAATCCCCGT AAGCACAGGA GATCCACAAT GCAGAATTTT GTTTTTTACA ACCCGACCCG  
TATCGTTTTT GCGCGTGACA AGACGGCGAG CATCGGCAAG GCGACCCTGC CGTATGGTCG  
CCGCGTTCTG CTGCTGACGG GTCAGGGTTC CGTCGTGAAA CACGGTATCC TGGCGAAAGT  
GACCTCTTCC CTGTCTACTG CGGGTATCTC CTGGGTTGAG TGTAGCGGTG TGCAGCCGAA  
CCCGGTTCTG GGCTTCGTGC GTCAGGCCAT CGACACTTTC CGTCGTGAAA ACCTGGACGC  
CATTGTAGCG GTTGGCGGTG GCTCCGTGAT CGACACCGCG AAGGCGGTGG CTGCGGGCGT  
TCGTTACGAA GGCGATGTTT GGGACTTCTT TACCGGTAAA GCTAACGTCC TGGACGCGGC  
CCCGATCACT GTAGTGCTGA CTCTGCCGGC GGCTGCATCC GAGATGAACA GCGGCGGTGT  
TATCACTAAT GAACAACTC GTCAAAAATT CAACCTGGGC GGCGAACCGC TGTCTCCGAA  
AGTTTTCTAT CTGGACCCGG TCAACAGCTT TAGCGCCCCG GTGAATCACT CCCTGTACGG

TGTTGTTGAC GCGAT

**ADH10 G2 (Accession No. E6W4G5\_DESIS)**

ACAGCTTTAG CGCCCCGGTG AATCACTCCC TGTACGGTGT TGTTGACGCG ATGGTTCATC  
TGCTGGAGGG CTA CTTCAAC GGCTCTGACC CGTGGACTCC ACTGCAGGAC CGTTACGCGG  
AAGGTATCAT TCGCACTCTG ATGGAATGCG CTGCCATTAT TCGTGAACAG CCAGACCACT  
ACGACGCACG TGCTAACATC ATGTGGGGCG C GACTCTGGC TTTCAACGGC CTGGCACCGT  
GCGGTATCGG CCCGGCAGGT TTTCCGATGC ACATGATCGA ACACAGCCTG TCTGCACTGT  
ATGATGTATC TCATGGTGCG GGTCTGGCGA TGATCCTGCC GGGTTGGCTG AAGTACCACT  
CCGATTCCAG CCCGCGCAA GTTAACCACT T TGGCCGTCG TATTTTTGAA CTGGATCACC  
AGGATGATCG TCAGGGCGCT CAAGCAGCCA TTGCCGAGCT GGAACGTTGG CTGCGTTCCA  
TGGATATCCC GGCATCCCTG CACGAAGGTG GCATCCCGAT CGATGAGATC CCAGCAATTG  
CGGAGAACGC TGTGATGCTG GCGCAGAAAT GGGGTCTGAA AGCTTACACT CAGGCCGTTA  
TCGAAGACGT TCTGCGTCGC GCTTCTCGCT AAAC TAGTAT CGATGATAAG CTGTCAAACA  
TGAGCAGATC TGAGCCCGCC TAATGAGC

**ADH11 G1 (Accession No. E6K7W2\_9BACT)**

CGAGCGCCCC TAACTTCACG CGCCAACGTC GTTGTGTTCT GGCCGGCTAA TCTAGATGAT  
CCCTCCACAA CTAAAGGCGG TATTCAAATG AAAGACTTCA ACTTCTACGC ACCGACCCGT  
GTAGTGTTTCG GCAAACAGAG CGAAGAGCAG CTGCCGCGCC TGCTGAAAGA AGCGGGTGGT  
AAAAAGGTTT TGGTACACTA TGGTGGCGGC TCTGCAAAAC GTTCTGGCCT GCTGGATAAA  
GTGTATGGTA TGCTGGACGA CGCGGGCATC GAACATGTAG GTCTGGGCGG TGTAGTACCG  
AACCCGCTGC TGTCCAAAGT AAACGAAGGC ATTGACCTGT GCCGTCGTAA AGGTGTA AAC  
TTCATTCTGG CTGTAGGCGG CGGCTCCGTA ATCGATAGCG CGAAAGCAAT TGCGTATGGT  
GTGCCGTACG AGGGTGACGT TTGGGATTTT TGGAAATGGTA AGCCGGCAAC CGCTGCCCTG  
CCGGTCGGTG CAATGCTGAC TATCCCGGCT GCTGGCTCTG AAATGAGCAA TTCTTGCGTG  
ATTACTAAAG ACGAAGGTGC TGTTAAACGT GGCTTCAACA ACGATCTGTG CCGCTGTAAA  
TTCGCGATCA TGAACCCAGA ACGCACTTAC ACGCTGCCGC CGTACCAGAC TGCCGCGGGT  
GCGACCGACA TCATG

**ADH11 G2 (Accession No. E6K7W2\_9BACT)**

CACTTACACG CTGCCGCCGT ACCAGACTGC CGCGGGTGCG ACCGACATCA TGATGCACAC  
CATGGAACGC TACTTTTCCA AACATGAAGA CATGACCCTG ACCGACGCAA TTGCGGAAGC  
CCTGCTGCGC ACGGTTAAAG AAAGCACCTT CGAAGTGCTG AAACACCCGG AGGACTACCG  
TAACCGCGCT CAGATTATGT GGGCCGGCTC CCTGTCTCAT AACGATCTGA CCGAATGTGG  
TCTGGAAAAG GATTTTCGCGA CTCACCGCCT GGAACACGAG CTGTCTGCGC TGTTCCGGCT  
TACCCATGGC GCCGGCCTGG CAGCCGTGTG GCCTGCATGG GCGCGTTATG TGATGAAGAA  
ACACATTTCC CGTTCGTTT AGTTCCGCGT CAACGTGATG GCGGTTCCGA ACGATTTTC  
TAACCCGGAA GCTACCGCTG AGAAAGGTAT CTGTCTGATG GAACACTTCT TCCACCGCAT  
CGGTATGCCG ACCTCCATCA AAGA ACTGCT GGGTCATGAT ATCACC GAAG CGCAGATTGA  
CGAAATGGTT GACAAATGCT CTCGTGGTGG TACTATCACT GTTGGTGCCA TGGAGGTGAT  
TGCCCCAGAC GACATGCGTG CGATCTACCG TATGGCACGC TAAACTAGTA TCGATGATAA  
GCTGTCAAAC ATGAGCAGAT CTGAGCCCGC CTAATGAGC

**ADH12 G1 (Accession No. B1C4Z8\_9FIRM)**

CGAGCGCCCC TAACTTCACG CGCCAACGTC GTTGTGTTCT GGCCGGCTAA TCTAGATGGT  
TCTACAATAA TAGGAGGACT CTACACATGC TGGGCGACTT TACCTACTCC AACCCGACGA  
AAATTTATTT CGGCGAGAAC TCTCTGGACA ACCTGTCTAC CGAACTGAAA AACTATGGCA  
AGAACGTGCT GCTGGTATAC GGTGGTGGTT CTATCAAAAA AAACGGTATC TACGATAAGG  
TTATCGACAT TCTGAAAAAG TGTGATAAGA CTATTATTGA GGATGCGGGC GTAATGCCTA  
ATCCGACTGT TGAAAAGCTG TATGAAGGTT GCAA ACTGGC TCGTGAAGGT AACGTTGACC  
TGATTCTGGC GGTGGCGGT GGCAGCGTGT GTGACTACGC GAAAGCAGTT AGCGTCAGCA  
CGTATTGCAA CGAGGATCCG TGGGAAAAGT ACTACCTGCG TATGGAGGAC GTTGATAACA  
AAATTATCCC AGTTGGTTGT ATCCTGACCA TGTTGGTAC TGGTTCCGAA ATGAATGGCG  
GCTCTGTTAT CACCAATCAT GAACAGAAAC TGAAAATTGG TCACGTTTTT GCGACAATG

TGTTCCCGAA GTTCTCCATT CTGAACCCGA CCTTCACCTA CACGCTGCCG AAATATCAGA  
TGATCGCTGG TTTCT

**ADH12 G2 (Accession No. B1C4Z8\_9FIRM)**

AACCCGACCT TCACCTACAC GCTGCCGAAA TATCAGATGA TCGCTGGTTT CTACGACATC  
ATGTCCATA TCCTGGAACA GTACTTTAGC GGTGAAGACG ACAACACCTC TGATTATATC  
ATGGAAGGTC TGCTGAAATC TCTGATCCAT TCTAGCAAAA TTGCCGTGAA CGATCCTACC  
AACTACGAGG CTCGTTCTAA CATCATGTGG ATTGCAACCT GGGCTCTGAA CACCCTGGTG  
GCTAAAGGCA AAACCACGGA TTGGATGGTT CACATGATCG GCCAGAGCAT CGGTGCTTAC  
ACCGACGCCA CGCATGGTAT GACCCTGGCT GCCGTGTCCA TTCCGTAATA CAAGTACATT  
TGTCCATACG GCCTGAACAA ATTCAAACGC TATGCGATTA ACGTTTGGGA TGTTCTGTCT  
GAAGGCAAAA CTGACGAGCA GATCGCTAAC GAAGGTCTGG AATGTATGGA AAAATACATG  
CGTGACCTGG GTCTGGTAAT GAACATTTCC GATCTGGGCG TCAAAGAAGA GATGCTGGAG  
GGTATCGCTG AAGGTACGTT CATCATGAAC GGCGGTTATA AAGTACTGAC CAAAGACGAA  
ATTATCACCA TCCTGAAACA ATCCATGAAA TAAACTAGTA TCGATGATAA GCTGTCAAAC  
ATGAGCAGAT CTGAGCCCGC CTAATGAGC

**ADH13 G1 (Accession No. G4L3E3\_TETHN)**

CGAGCGCCCG TAACTTCACG CGCCAACGTC GTTGTGTTCT GGCCGGCTAA TCTAGAACGT  
AAGGCCACTA CATTAACTAA GGAGCAAAAT ATGGAAAATT TCGATTTCCA CGTTACTACT  
GATATCCGCT TTGGCAAAGA CCGTCTGGGT GAACTGCCGC AGGTTCTGAA CAACTTCGGC  
AAAAACGTGC TGCTGGTTTA CGGTGGTGGC TCCATCAAGC GTAATGGTCT GTACGACAAA  
CTGTACGAAC TGTTCAACCA GAACGACAAT AACGTTGTTG AACTGGCGGG TG TAGACCCG  
AACCCGCGCA TTGAAACCGT GCAAAAAGGT GTCCAGCTGT GTAAGGAACA CGCGATCGAC  
GTCGTGCTGC CGGTAGGTGG CGGCTCTGTG ATTGACTGCT CCAAAGCTGT GGC GGCTTGC  
GTCTTTGTTA GCGGTGACCT GTGGGAAAAC TTCGTGCTGC AGAAAACTA TAAAGGCCCG  
GCACTGCCGA TTGTACCAT TCTGACGCTG GCCGCTACGG GCTCTGAGAT GAACGGTACG  
TGCGTAATCT CTAACATGGA TGCGCAGATT AAAC TGGGCG TCCACGGTAC CACCAACCTG  
CTGCCAAAGG TATCCTTCTT GGATCCGACT AACACCTTCT CTGTTGGTGC ATACCAGACT  
GCAGCTGGCT CCGCTGACAT CCTGAGCCAC CTGAT

**ADH13 G2 (Accession No. G4L3E3\_TETHN)**

TGGTGCATAC CAGACTGCAG CTGGCTCCGC TGACATCCTG AGCCACCTGA TGGAGAACTA  
TTTCAACGCG ACCGAAGGCA CCGAAGTTCA GGATGAAATC GCTGAAGGCC TGATGAAAAC  
GGTATCAAAA TATCTGCCGG TGGCGCTGGA CGAACCGGAC AACTATATTG CCCGTGCTAA  
CCTGATGTGG GCCTCTACTC TGGCGCTGAA CGGCCTGGTT GGCAAAGGTA AAAAAGGCAG  
CTGGTCTTGT CATGCTATGG AACACGAAT GTCCGCTTTC TATGACATCA CTCACGGCGT  
CGGCCTGGTT ATGCTGACCC CGCGTTGGAT GGCACACATC CTGGACGAAG ACACCCTGCC  
GAAATTTCAA GCTTTTGCTG AAGAGGTCTG GAATGTTAAA GAAAAGGAAC CGAAACGTAC  
GGCGGAGATC GGCATTCAGA AACTGTACGA TTTTTTCGTC TCCTGCAACA TCCCTATGAC  
CCTGTCCGGT GTGGGCATCC AGACCGAAGA AAATTTTGAA GAAATGGGTC AGCGTGCCGT  
TGCTCACTCC TCCATCTCTA ATCAGGGCTT CGTACCGCTG CACGAGGACG ACGTGGTCTC  
CATCTATCGC GACTGCATGT CCGAGTCTTC TTTCTGCTAA ACTAGTATCG ATGATAAGCT  
GTCAAACATG AGCAGATCTG AGCCCGCCTA ATGAGC

**ADH14 G1 (Accession No. E8LLW8\_9GAMM)**

CGAGCGCCCG TAACTTCACG CGCCAACGTC GTTGTGTTCT GGCCGGCTAA TCTAGAAGTA  
TATTTCCCGC TCAATATAAG GAGGAGTACA TATGGAATCT TTGATTTTTT TCCGTGCGAC  
TCGTATCATC TTTGGCCAGT CTGCGGACAA CGAAGTAGGT CAGATTATCA AATATCAAGG  
TGGCACTCGT GTGCTGCTGC TGCACGGTGA AAAAGCAGCG ATCAAGTACG GTATTGTGGA  
GCGTATTGGT CGTACTCTGG ACCGTTCCGG TCTGAAATAC TTCTCCAAAG GCGGCATCAA  
GAGCAACCCG CATATTGATA AAGTTTACGA ATGCATTGAA TTCTGCCTGT CCAACTCCAT  
TAATTATATC CTGGCTGTGG GTGGTGGTTC CGTGATCGAC ACCGCCAAAA TCGTCGCGGC  
GGGCGTATTC TTCGACGGCG ACATCTGGGA CATGTTTGAA AAACATCGCG AACCGTACCG  
TTCCCTGCCG CTGGGCTGCG TAGTTACCGT TCCTGCAAGC GGTACTGAAT GCAGCAACTC

TTCTTCCCTG ATGCGTGAAA AAGACGGCCG CCGTGAAAAA CTGATCGCGT ATTCTAACAG  
CTTCGTACCG GAGTTCGCCA TTCTGAACCC GGACCTGACG CTGTCTCTGT CTCCGCGTGT  
GACCGCTAGC GGTTGCGTTG ATATGATTAA CCATG

**ADH14 G2 (Accession No. E8LLW8\_9GAMM)**

CTCTGTCTCC GCGTGTGACC GCTAGCGGTT GCGTTGATAT GATTAACCAT GTCCTGGAAG  
GTTATTTTCTC CAACTCTACC GGTGTACTGC TGAGCGATAA GCTGTGTGAA GCGGTTCTGA  
GCTCTATTAT CGAACTGCTG CCGCAGATCT ATGAAGATCC GAATAACATT GATGCGCGCG  
CAAACCTGAT GCTGGCAGCA ACCCTGTCTC ACAATGATAT CTGCTGCATG GGCCGCAAGT  
CCGACAACGT TATCACGAAA CTGGCCAACC AGCTGGTGGT TGAAAACGAT TGTCCGTTTCG  
GTGATGCACT GGCTGTTCTG ATCCCGGCTT GGATGGAATA TGTTGTTTCAG TTTAACCCGC  
TGCGCATCGC ACAATTCTCC AACC GCGTTT TTGGTATCGC AATCAACTTC GAAGATCCGA  
AAATTACCGC GTATGACGGT ATCAAAGCCC TGCGCGCTTT TTTCAAAAAT GTAAAACCTGC  
CGTGCAACTT CGTTGAACTG GGTATCAAGA CCGAAGCAAT CGCGGACATC GTAAAACGCTC  
TGGACCTGAA AGAAGGTA AAA ACTCTGGGTT CTTTTGTGCC GCTGGACGCT GTGGCCTGCG  
AAGCAATCCT GTCCCTGGCC GCCAATTACT GCGAAGGTCG CGATATTTTC TAAACTAGTA  
TCGATGATAA GCTGTCAAAC ATGAGCAGAT CTGAGCCCCG CTAATGAGC

**DhaT2 G1 (Accession No. E4RKV2\_HALSL)**

CGAGCGCCCC TAACTTCACG CGCCAACGTC GTTGTGTTCT GGCCGGCTAA TCTAGATCCT  
TACCGCTTAC CACGAAATAA AGAGGGAAAA ATGTCCGACT ACTATGATTA TATGCTGCCG  
ACCGTTAACT TCATGGGCC GGGCTGTGTG GAGGTTGTGG GCGAACGTTG CAAGATCCTG  
GGTGCTAAAA AAGTTCTGAT TGTTACCGAT TCTTTCCTGC GTAACATGGA AGGCGGCCCG  
GTGACACCAGG TGGTCAAATA CCTGAAAAAG GCGAATCTGA ATTACGCTTT TTACGACGAG  
GTTGAACCGA ACCCGAAAGA CGTTAACGTT TACGCCGGTC TGAAAATTTA CGAACGTGAA  
AACTGCGATA TGATCGTTAC CATTGGTGGT GGTTCCGCTC ACGATTGTGG TAAAGCTATT  
GGTGTGCTG CTACTCATGA CCGTGTATCTG TACAAAGACT ACGCTGGCAT CGAAAAGCTG  
GAAAACGAAA CTCCGCCGAT GGTATGTGTG AACACCACTG CTGGCACCGC TTCTGAAGTT  
ACTCGTACA CCGTGATTAC TGACACCAGC CAGACGCTA ACGTCAAGTT CGTGAATGTA  
TCCTGGCGTA AACTCCAGA TGTGTCTATC AACGATCCGG AACTGATGGT TGGTAAGCCG  
CCGGGTCTGA CCGCAGCTAC TGGCATGGAC GCTCTGACTC ACGCGGTTGA AACCTATGTG  
AGCACCAATG CGAAC

**DhaT2 G2 (Accession No. E4RKV2\_HALSL)**

CATGGACGCT CTGACTCACG CCGTTGAAAC CTATGTGAGC ACCAATGCGA ACGCGCTGAC  
TGATGCCGCG GCTATTAAGT CTATTGAACT GGTTGCTAAT AACCTGCGTA AAGTTGTAA  
AGATGGCCAG GACATCAAAG CCGCGAAAAA TATGGCGAAC GCTTCCGTTT TGTCTGGTTT  
CGCGTTTAA TAAACGGTGGT TGGTTACGT TCACGCTATG GCACACCAGC TGGCGGCTT  
CTACGACATG CCTCACGGTA TCGCAAATGC AATTCTGCTG CCGTACGTCG AGAAATCAA  
CCTGGGTACC GACGTTGAAC GTTTCAGCAA CATCACTGAA ATCTTCGGCA AAGAACAGTC  
TAAAATCAGC AATAATCCGG AAGCACAGGA AAGCATCAAA GCCATCAAAG ACGAAATCGA  
TAAACTGAAA CGCTTTAAAA AAATTGCAGA AGTGTGTTGGC GTGGATACCT CTAACATGTC  
TACCCGCGAA GCTGCAGAGG CTAGCCTGGA TGCCATCAAA GAACTGGCCC GTGATATCGG  
TATTCCGAGC TCTCTGTCTG AGTCTAAATT CGACGTTAAA CGTGACGATT TCGAGGAAAT  
GGCTAAACTG GCGCTGGAAG ATGGTAACGC GGGCACCAAC CCGCGTAAAG GTTCTGTAGA  
AGATATTGTT CGTATCTTCG AGGATGCGTT CTAAACTAGT ATCGATGATA AGCTGTCAAA  
CATGAGCAGA TCTGAGCCCC CTAATGAGC

**DhaT3 G1 (Accession No. Q15G22\_CITFR)**

CGAGCGCCCC TAACTTCACG CGCCAACGTC GTTGTGTTCT GGCCGGCTAA TCTAGATAAT  
AGCAATACTA ATAAAGAGGT CTCCTAATGA GCTATCGCAT GTTCGACTAC CTGGTCCCGA  
ACGTGAACTT CTTCGGTCCA AACGCAATCA GCGTGGTGGG TGAACGCTGC CAGCTGCTGG  
GTGGTAACAA AGCTCTGCTG GTGACCGACA AGGGTCTGCG CGCTATCAAA GACGGTGC GG  
TAGACAAGAC CCTGCATTAC CTGCGTGAGG CGGGTATCGA GGTTGCTATC TTCGATGGCG  
TTGAACCTAA CCCGAAGGAT ACTAACGTGC GCGACGGTCT GGCAGTTTTT CCGCGTGAAC  
AATGCGATAT TATTGTGACG GTTGGTGGCG GTTCCCCGCA TGATTGCGGC AAAGGTATCG



GCATCGCTGC TACGCACGAA GGTGCGATCT GCACTTCTAT GCCGGAATCC CGTCCGTGGA  
CCAACCCGCT GCCTCCGATC GTGGCCGTAA ACACCACTGC AGGTACCGCC AGCGAAGTGA  
CCCCTCACTG TGTTCTGACC AACACCGAGA GCAAAGTAAA GTTCGTTATT GTCTCCTGGC  
GTAACCTGCC GTCTGTGTCC ATCAATGACC CGCTGCTGAT GATCGGTAAA CCGGCTGCC  
TGACGGCAGC CACCG

**DhaT3 G2 (Accession No. Q15G22\_CITFR)**

TGACCCGCTG CTGATGATCG GTAAACCGGC TGCCCTGACG GCAGCCACCG GCATGGACGC  
TCTGACCCAC GCAGTGGAGG CATACTCTC CAAGGATGCC TCCCCGGTTA CTGATGCAGC  
GGCTATGCAG GCAATCCGTC TGATCGCCCC TAACCTGCGC CAGGCCGTTG CTCTGGGCAG  
CAACCTGCAG GCTCGTGAAA ACATGGCGTA CGCTAGCCTG CTGGCTGGTA TGGCATTAA  
TAATGCGAAC CTGGGTTACG TGCACGCAAT GGCCACCAG CTGGGTGGTC TGTACGACAT  
GCCACATGGC GTGGCGAACG CAGTTCTGCT GCCGCACGTT GCCCGCTACA ACCTGATCGC  
GAATCCGGAA AAATTGCGCG ACATCGCGGA ACTGATGGGC GAAAATATCA CCGGTCTGTC  
TACTCTGGAC GCGGCAGAGA AAGCTATCGC AGCGATCACC CGTCTGAGCA TGGATATTGG  
TATCCCGCAA CATCTGCGTG ACCTGGGTGT CAAAGAAGCG GACTTCCCGT ACATGGCGGA  
AATGGCACTG AAAGACGGTA ATGCGTTCAG CAACCCGCGT AAAGGTAACG AGCAAGAGAT  
TGCGGCTATC TTTTCGTAAG CTTTTTAAAC TAGTATCGAT GATAAGCTGT CAAACATGAG  
CAGATCTGAG CCCGCCTAAT GAGC

**DhaT4 G1 (Accession No. A0PY50\_CLONN)**

CGAGCGCCCC TAACTTCACG CGCCAACGTC GTTGTGTTCT GGCCGGCTAA TCTAGAATAC  
GGAAACCTCA CGTATAACCA AGGAGGTTAC AATGCGCATG TATGACTACC TGCTGCCTAA  
CGTTAACTTC ATGGGCCCGG GCTGCATCAA AGTTATCGGC GAACGTTGCA AACTGCTGGG  
CGCTAAAAAA GCGTTCATCG TAACCGGTAA ACACATTGGT AGCATGGAAA ACGGTCCGCT  
GCAGATCGTT GTAAAATACC TGACCGATGA AGGTATCGAC TACGTTCACT TTAGCGGCTC  
TGAACCGAAT CCGAAAGACA TTAACGTGCG TAAAGGTGTT GAACTGTTCA AAAAAGAAAA  
CTGCGATATG ATCATTACCA TCGGCGGTGG TTCTGCACAT GACTGCGGTA AAGGTATTGG  
CATCGGCGCG ACGCAAGAG GTGACCTGTA CGACTACGCA GGCATCGAGA CTCTGACCAA  
CCCACATGCC CCTATTGTAG CCGTGAACAC CACCGCGGGC ACGGGCTCCG AAGTTACCCG  
TCACTGTGTG CTGACGAACA CCGAGAAAAA AATCAAATTC GTAATCGTGT CTTGGCGTAA  
TCTGCCGCGAG GTGAGCATCA ACGATCCGCT GCTGATGGTG GATATGAGCC CGCGTCTGAC  
TGCGGCGACC GGTAT

**DhaT4 G2 (Accession No. A0PY50\_CLONN)**

TCCGCTGCTG ATGGTGGATA TGAGCCCGCG TCTGACTGCG GCGACCGGTA TGGATGCACT  
GACTCACGCG ATTTAGGCCT ACGTGAGCAA AGACGCAAAC GTGGTTACGG ACGCGGCGGC  
AATTCAAGCG ATCAAATGA TCAGCAAAAA CCTGCGTAAA GCCGTCGCAC TGGGCGAAAA  
CCTGGAGGCC CGTGACAACA TGGCAAACGC TTCTCTGCTG GCAGGCATGG CCTTTAACAA  
TGCGAACCTG GGTATGTTT ATGCGATGGC TCATCAGCTG GCGGGTCAGT ACGACCTGGC  
CCACGGTGTT GCAAACGCCA TGCTGCTGCC GCATGTCGAA CGCTACAACA TTATCTCTAA  
CCCAGAAAAA TTCCGTGACA TCGCTGAGTT CATGGGTGAG AATATCGAGG GTCTGTCTGT  
CATGGAGGCT GCAGAAAAAG CAATCGATGC GATGTTCAAA CTGGCCGAAG ACATTGGCAT  
TCCGCGTCGC CTGCGTGACG TAGGTGTCAA GGAAGAAGAT TTCGAATATA TGGCGGGCAA  
CGCGCTGAAA GATGGTAACG CTTTTCTAA CCCTCGTAAG GGCCTGAAG AAGATATTGT  
CAACATTTTT AAAGCTGCAT ACTAACTAG TATCGATGAT AAGCTGTCAA ACATGAGCAG  
ATCTGAGCCC GCCTAATGAG C

**DhaT5 G1 (Accession No. Q3A1K9\_PELCD)**

CGAGCGCCCC TAACTTCACG CGCCAACGTC GTTGTGTTCT GGCCGGCTAA TCTAGAAATA  
TTATCTCTAA TCATAAAAGG AGGTTCAAAC TATGGCGGAT TTCCTGTGCC CTGCTGTTAA  
CTTTATTGGC GCGGGTACCG TAGCAGAAAC TGGCCCGCGT GCTGCGATGT TCGGTACGAA  
AGCTCTGATC GTGTGCGACG GCTTCCTGGC CAAACTGGAG GGCGGCCCTG TAAGCAAAGT  
GAAAGATACG CTGACTTCCT CTGGCGTTGA GTTCGCAGTT TATGACGGCG TGGAAACCGAA  
TCCAAAAGAT ACGAACGTAG CAGCCGGCCT GAAAATTTAT AAATCTGAAA ACTGTGACCT

GATCGTAACC GTTGGTGGCG GCTCCTCTCA TGATTGCGGT AAAGGCATCG GCATCGCAGC  
TACTCACGAG GGCACCTGT ACGAAGACTA CGCCGGTATC GAAACCCTGA CTAACGAACT  
GCCACCGATC ATCGCGGTAA ACACCACTGC TGGCACTGCG AGCGAGGTTA CGCGTCACTG  
CGTGATCACC AACACGGCGA AAAAGGTTAA GTTCGTTATC GTTTCTTGGC GTAACCTGCC  
AAAAGTGTCT ATCAATGACC CGGAGCTGAT GGTGCAAAA CCGGCTGGTC TGACCGCCGC  
GACCGGTATG GACGC

**DhaT5 G2 (Accession No. Q3A1K9\_PELCD)**

GCTGATGGTT GCAAAACCGG CTGGTCTGAC CGCCGCGACC GGTATGGACG CACTGACCCA  
CGCAGTTGAG TGTTACGTAA CTAAGGACGC GAACCCGGCG ACTGATGCTG TGGCTATCCA  
CGCTATCAAA CTGATCGGCA AGTACCTGCG TCGCGCAGTG GCAAACGGTG AAGACCTGGA  
AGCGCGCGAA GGTATGGCTT ACGGCTCTCT GCTGGCTGGT ATGGCTTTCA ACAACGCGGG  
CCTGGGCTAT GTTCACGCTA TGGCGCACCA GCTGGGCGGT CTGCTGGATA TGCCGCACGG  
CATCGCAAAC GCGGTGCTGC TGCCGCATAT CGAACGTTAC AACCTGATGG TGAACCCGGA  
AAAATTGCGC GATATTGCGG AGGCGATGGG TGAAAACATC GATGGTCTGG GTAAAATGGA  
AGCTGCTGAA AAGGCTATCG ATGCTATCGT TCGCCTGTCC ATTGATGTTG GTATTCCGCA  
GCATCTGGCT GACCTGGGCG TTAAAGAATC CGATCTGGAG CCGATGGCGA AACTGGCCAT  
GCAAGATGGC AACGCAGGTA CTAACCCGCG TGTTGGCAA GTTGAAGATA TCATCCAAT  
GTTCAAAAAC GCAATGTAAA CTAGTATCGA TGATAAGCTG TCAAACATGA GCAGATCTGA  
GCCCCCCTAA TGAGC

**DhaT6 G1 (Accession No. A5D4X5\_PELTS)**

CGAGCGCCCG TAACTTCACG CGCCAACGTC GTTGTGTTCT GGCCGGCTAA TCTAGATTCC  
ATTTTTCTTC CACCAAAAGG AGTTACTTCC ATGTATTACG ATTTCTGAA CCCGTCCGTT  
AACTTTTTTG GCCCGGGTTG TGTCTCCGTT GTAGGCGAGC GTTGCAAGAT CCTGGGCGGC  
AAAAAAGCTC TGATTGTTTG CGATCCGTTT CTGGCAAAGA TGGAAGGCGG TCCGGTGGAA  
CAGGTACTGG GTTACGTTCA GGAAGCGGGC CTGAAAACCG TGGTCTTTGA CGGTGTGGAA  
CCAAACCCAA AAGACAAAAA TGTACACGCA GGCCTGAAAG TGTTCAAAGA AGAAAAATGC  
GATATGATCA TTACTGTTGG TGGCGGTAGC GCGCACGATT GTGGCAAAGG TATTGGTATC  
GCGGCTACCC ACCCGGGTGA TCTGTACAAA GACTACGCGG GTATTGAAAA ATTGACCAAT  
CCGCTGCCAC CGATTGTTGC AGTGAACACC ACTGCTGGTA CCGGCTCCGA AGTTACTCGT  
CACTGCGTTC TGACTAACAC CTCCACTTCC ATCAAATTCG TCATTGTCTC TTGGCGCAAC  
CTGCCACTGG TTTCCATCAA CGATCCGATG CTGATGCTGA AAAAGCCGGC GGGTCTGACT  
GCGGCCACTG GCATG

**DhaT6 G2 (Accession No. A5D4X5\_PELTS)**

TCCGATGCTG ATGCTGAAAA AGCCGGCGGG TCTGACTGCG GCCACTGGCA TGGATGCTCT  
GACGCACGCA GTCGAATGCT ATGTTACCAA AGCTGCAAAC CCGGTGACGG ACGCACTGTG  
TGCGCAATCC ATCAAATGTA TCGCGAATAA CCTGCGTCAG GCGGTGGCGA ACGGTGAAAA  
CCTGACCGCT CGTGAAAACA TGGCATATGC TAGCATCCTG GCGGGCATGG CCTTCAACAA  
CGCCGGTCTG GGCTATGTTT ATGCAATGGC TCACCAACTG GGTGGTACT ATGACATGGC  
GCACGGTGTG GCGAACGCTA TCCTGCTGCC GCACGTGGCT CGCTTTAACC TGATCAGCAA  
CCCACAAAAA TTCGCGGATA TCGCAGTGTT TATGGGTGAA AACATCGAAG GTCTGTCCGT  
ACGTGCGGCG GCAGAAAAAG CGATTGACGC CATTGTTTCCG CTGTCCAAGG ATGTGGGCAT  
CCCATCTGGC CTGGCTGAGA TGGGTGTAAA AGAGGAAGAT TTTGACAAAA TGGCGAAAAC  
GGCACTGGAG GATGGTAACG CTGGCTGCAA CCCGATTGTG GGTACCCACC AGGATATTGT  
GAAGCTGTTT GCGGCTGCTA TGTAACCTAG TATCGATGAT AAGCTGTCAA ACATGAGCAG  
ATCTGAGCCC GCCTAATGAG C

**DhaT7 G1 (Accession No. B1V2D9\_CLOPF)**

CGAGCGCCCG TAACTTCACG CGCCAACGTC GTTGTGTTCT GGCCGGCTAA TCTAGAAGCC  
TAGGCTAAGA AGCATAAGGA CCCCCTATG GAAGAGAACG AAATGCGTAT GTATGACTAC  
CTGGTTCCGA GCGTGAACCT CATGGGTGCT AACAGCATT CCGTTGTAGG CGAGCGTTGC  
AAAATCCTGG GTGGCAAGAA AGCTCTGATC GTTACCGACA AATTCCTGCG TGGCCTGAAA  
GGTGGTGCAG TTGAACTGAC GGAAAAATAC CTGAAGGAGG CGGGCATTGA AGTAGCATA

TACGACGGCG TAGAACCGAA CCCGAAAGAC ACTAACGTGA AAGATGGTCT GAAGATCTTT  
 CAGGACGAGA ACTGTGATAT GATTGTAACC GTTGGTGGTG GTTCCTCCCA CGACTGCGGC  
 AAGGGCATTG GTATCGCGGC GACTCACGAA GGCGATCTGT ACGACTATGC AGGCATTGAA  
 ACCCTGACCA ACCCGCTGCC TCCGATCGTG GCTGTAAATA CTACCGCCGG TACGGCAAGC  
 GAAGTTACCC GCCACTGCGT CATCACTAAC ACCAAAATA AAGTTAAATT CGTGATTGTT  
 AGCTGGCGTA ACCTGCCGCT GGTCAGCATT AATGATCCGA TGCTGATGGT TGGTAAGCCG  
 GCGGGCCTGA CCGCA

**DhaT7 G2 (Accession No. B1V2D9\_CLOPF)**

CAGCATTAAAT GATCCGATGC TGATGGTTGG TAAGCCGGCG GGCCTGACCG CAGCAACTGG  
 CATGGATGCT CTGACCCACG CAGTTGAAGC TTACGTTTCT AAAGATGCCA ATCCTGTTAC  
 CGACGCGGCA GCAATTCAGG CAATTAAACT GATTTCTCTC AATCTGCGTC AGGCGGTAGC  
 CCTGGGCGAA AACCTGGTGG CTCGTGAAAA CATGGCGTAT GGCAGCCTGC TGGCTGGTAT  
 GGCCTTCAAC AACGCAAACC TGGGCTATGT GCACGCTATG GCGCACCAGC TGGGCGGCCT  
 GTACGACATG CCACACGGTG TTGCTAACGC GATGCTGCTG CCTCACGTGT GTAAATATAA  
 TCTGATCAGC AACCCGCGA AGTTCGCTGA TATCGCCGAA TTTATGGGCG AAAACATCGA  
 GGGCCTGTCC GTGATGGACG CGGCACAGAA AGCGATCGAC GCGATGTTCC GTCTGTCTAC  
 GGATATCGGC ATCCCTGCTA AACTGCGCGA TATGGGCGTT AAGGAGGAAG ACTTCGGTTA  
 CATGGCCGAA ATGGCGCTGA AAGATGGCAA CGCGTTTTCC AATCCGCGCA AAGGCAACGA  
 ACGCGATATT GTTGAATTT TCAAAGCAGC TTTCTAAACT AGTATCGATG ATAAGCTGTC  
 AAACATGAGC AGATCTGAGC CCGCCTAATG AGC

**DhaT8 G1 (Accession No. E3H9G9\_ILYPC)**

CGAGCGCCCG TAACTTCACG CGCCAACGTC GTTGTGTTCT GGCCGGCTAA TCTAGAAGCC  
 TAACTTAAAT TTTAAAGGAG GCCCTTATGC GTTACTACGA CTATCTGATG CCGTCTGTGA  
 ACTTTTTTCGG TCCGGGTTGC CTGGAAGTGA TCGGCGAACG TGCAAAAATC CTGAATGGCA  
 CTAAAGCTCT GATCGTTACG GACAAATTCC TGTCTTCCCT GAAAGGCGGT GCTGTTGAAA  
 AAACCCTGGA GTATCTGAAA TCCGCTGGCG TTGAAGCCGT TGTATTTGAT AACGTGGAAC  
 CGAACCCAAA GGATACCAAC GTTTACGAGG GTGCAAAAAGT ATATAAGGAA AACAATTGCG  
 ATATGATCAT CACCGTGGGC GGTGGTAGCC CACACGACTG CGGTAAGGGC ATCGGTATTG  
 CAGCGACCCA TGACGGCGAC ATCTGTGATT ATGCCGGTAT TGAAACCCTG ACCAACGCGC  
 TGCCGCCGAT CATCGCTGTT AACACCACCG CTGGCACTGC TTCTGAAGTT ACTCGTCACG  
 CCGTCATTAC TAACACTAAG ACCAAAGTTA AATTTGTGAT CGTGAGCTGG CGTAACCTGC  
 CACAAGTTAG CATCAACGAC CCGCTGCTGA TGATCGGTAA ACCGGCTGGT CTGACCGCAG  
 CTACCGGTAT GGACG

**DhaT8 G2 (Accession No. E3H9G9\_ILYPC)**

GCTGCTGATG ATCGGTAAAC CGGCTGGTCT GACCGCAGCT ACCGGTATGG ACGCTCTGAC  
 CCATGCTGTG GAAGCTTACA TTTCCAAGGA CGCGAACCCA ATTACTGATG CTGCGGCAAT  
 CCAAGCGATC AAAGTATCG CCCAGAACCT GCGTCTGGCC GTGGCCAACG GCGAGAACCT  
 GAAAGCGCGT GAAAACATGG CGTACGCTTC TGTACTGGCC GGTATGGCAT TTAACAACGG  
 CAACCTGGGT TACGTTACG CGATGGCGCA CCAGCTGGGC GGCCTGTATG ATATGCCGCA  
 CGGCATCGCA AACGCAATGC TGCTGCCGCA CGTGTGTAATA TATAACATGA TCTCTAATCT  
 GGATAAGTTT GCAGATATCG CAGAATTTAT GGGTGAAAAC GTTGATGGCC TGTCTAAATC  
 TGAAGCGGCC GAAAAAGCGA TCTCTGCGAT GTTCCGTCTG TCTTCCGATC TGGGCATTCC  
 GACCTCTCTG GAAGAAGCAG GCATCAAAGA ATCCGACATT GAACTGATGG CTGAGAATGC  
 CCTGAAGGAT GGTAACGCGT TCTCTAACCC ACGTAAAGGC AACGAGAAAAG ATGTTGAAAA  
 CATTTTTTAAA GCGGCGATGT AAAGTAGTAT CGATGATAAG CTGTCAAACA TGAGCAGATC  
 TGAGCCC GCC

**ADH15 (Accession No. Q1JYE4\_DESAC)**

GATACAGGTC TCGTCTAGAA GAGATCATAA TAGAGAGGAT ACCATGACAGC CGTTCGTGTT  
 TCATAACCTT ACCGAAATCG TTTTCGGCGT TGACACTGCT GATAAAGTAG GCAAATACGC  
 CGCACGTCAG GGTGGTAAAG CCCTGCTGGT TTATGGCCGC AACTCTATCA AAACCACTGG  
 CCTGTATGAT CGCGTAACTG CTAGCCTGCA GGCCGCCGGC CTGAGCTGGG TTGACCACGG

CGGTGTCAAA TCCAACCCGG TTCTGAGCCA CGTGCGTGAA GCGGTTGCAG TTGCAAAACG  
 TGAACAAGTA GACGTTGTTG TCGCAGTAGG CGGCGGTAGC GTTCTGGATG AGTCTAAAGC  
 GATCGCTGCA GGC GCGCTGT GCGATCACGA TGTTTGGGAG TTCTTCCTGC AGGCTAAAGT  
 CGAGAAAGCG CTGCCGCTGG TTACTGTTCT GACTCTGGCT GCAACGGGTT CCGAAATGAA  
 CAGCGGCGGC GTTGTAACCA ACGAGAACAC CGCTCAGAAA TTCAACATCG GCTCCCCGCT  
 GCTGTTCCCG AAAACGTCTA TTCTGGACCC GGC ACTGACC TATACTGTTT CCGCTGATTA  
 CACCGCATAT AGCGCCGTGG ATGCGATCTC TCACATCATC GAAGGTTATT TCACCTCCAA  
 CGATCAGGCA ACTCCTCTGC AGGACCGTTT CGTAGAAGGC CTGGTGAAAA CCATCATGGA  
 GTCCACCGAG CAGATTCTGC AGCAACCGGA TCACGCGGAC GCGCGTGCTA CCATGATGTG  
 GTCTGCCACT TGGCTCTGA ACGGCCTGTC CACTGCTGGT ATTGGTCTGT ATCAATTTCC  
 GAACCAATG ATCGAACACT CTCTGTCCGC TATGTACGAC ATCGCCCATG GTGCCGGTCT  
 GTCCATTGTA ATCCCAGGTT GGATGGATTA TGCGGCGACC CAAAACCCGG TAAATTCGC  
 TCAGTTTGCA CGTCGTGTTT TCGACTGTGA ACTGAGCGAT GACCTGGAAT GCGCTCGCTA  
 CGGCATCGAA GCGCTGAAAA CGTGGTTTCA TTCTATCGGC TCTCCGGTGT CCCTGGCTCA  
 GGGTAACATT CCTGATGAAG AGATCGGCGC TATCGCAGAT AACGCTGTAA TGCTGGCCCG  
 CAAATGGGGT CTGAAAGCGT ACACCGCCGA AGTTATTGCC GACATCTGA GCCGCTGTCC  
 TAGCTAAACT AGTAGAGACC GATACA

**ADH16 (Accession No. B5YIE2\_THEYD)**

ATGAAAAACT TTGAGTTCTA CAACCCGACG CGCATTATCT TTGGCAAAGA AGCCGAAAAAG  
 AAGATCGGCA AAATCCTGGA GAAAGACGAC GTTGAACGTG TGCTGTTCTG GTATGGTAAA  
 AGCTCTATCA AAGAGACAGG CCTGTATGAT CGCATTGTTA AGGCTCTGAA AAAAGAAGGC  
 ATCGAATTTA TTGAGCACGG TGGTGTGAAG CCGAATCCGG TGCTGTCCCA CACCCGTGAA  
 GGTATTGAAA AAGCGAAGAA GCACAAGGTA GACGCGATTC TGGCTGTAGG CGGCGGTAGC  
 GTTATCGACG AAGGCAAAAC TATTGCAGTC GGTACCAAAA CCGACAAAGA CGTTTGGGAT  
 TTCTTCAAAC GTAACAAAGA AATTAATAAA GC ACTGCCGA TTTATGTGAT CCTGACTCTG  
 GCGGCAACCG GTTCTGAAAT GAACGGTTTC GCTGTAATCA CCAACGAAGA AACCCAGGAA  
 AAGCTGAGCA TCTCTTCTGA ACACATCTTC CCGCGTGTTT CTATCCTGAA CCCGGAAGT  
 ACCTTCACCG TATCCGCTAA ATATCAAGCG TACGCGGCAG TAGACGCAAT CGCGCACGTT  
 ATCGAACACT ATTTCTCCGG TTCTTACTGC CCGAACCTGC AGAACCGTTT CGTTGAGGGT  
 CTGATCAAAA CCGTAATGGA AACCACCGAA ATCATTCTGA AAGAACAGAA GAACTACAAC  
 GCTCGTGCGA AATTTATGTG GGCGGCTACC CTGGCCCTGA ACGGCCTGGC AAAGCTGGGC  
 ATCAAAGGCG GCTCCTTCCC GAACCACATG ATTGCACATT CCCTGGGTGC TATCTACGAT  
 CTGCCACATG GTGCTTGTCT GAGCATCGTA ATTCCGGCGT GGATGAAATG GTACCAAGAA  
 AAGAACCTGA TTCAGTTTGA ACGCTTCGCC AAAGAAATCT TCGGCGTCAA CACTGCTACC  
 GAGGGTGTGT TTCAACTGAA AGAATGGTTT CGCAAAATCG GTGCGCCGGT TTCTCTGAAA  
 GAGGCAGGCA TCTCCATTGG CGAGATCGAT CGTATTGTAG ACAATGCGTA TAACATCGCG  
 AAAGTCTGGC AGATGAAAA AGACTACACT AAGGAGGTAC TGACCGAAAT TATCAAAAAAC  
 GCTAACGATT AA

**ADH17 (Accession No. D2BSS7\_DICD5)**

GATACAGGTC TCGTCTAGAT AGCCAGATTA AGGAGCAGCA AAAATGGACA ATTTTAGCTT  
 TTATAACCCG ACCCGTATCG AATTCGGTGC TGGCAAAGAA CAGCTGATCG GTGAAATCAT  
 GGCTTCTCAC GGCATTAAGA AAGTCCTGCT GTCCTATGGT AGCGAACGCA TTAAAGATAA  
 CGGCCTGTTT GTGACCGTTT CCGACTCTCT GAACCGTCAC GGCATCACTC TGATCGAATG  
 CCGTGGTATC ATCTCTAATC CGCTGATTTT CAAAGTACGT GATGCGATCA CCGTAGCTAA  
 AGAGCAGAAT GTTGACGCCA TCCTGTCTGT TGGTGGTGGT TCTGTGCTGG ATTCCGCAAA  
 AGCAATCGCA GCCGGTTCCC TGTATCAGGG TGACGTGTGG GACCTGTTCA TCGGTAAGGG  
 CCAGATTGAC GCAGCACTGC CAGTTTTTCGC CATCCTGACT CTGGCGGCGA CTGGTTCTGA  
 AATGAACTCT GGTGCGGTGG TGACTAACGA CGACACCAAA GAAAAATTCG CAATCAACAG  
 CGTACACATC TTCCCGAAAG TGTCCATTGT AAACCCAGCT CTGATGCAAA CCGTTTCCCG  
 TGACTACCTG GTGTATTCTG CTGCAGACAT CATTGCACAT TCTATTGAAG GTTACTTCAC  
 TGCGACCATT CAGCCGAAAA TTCAGTCCCG TCTGGTTGAA TCTGTCATTG CTACCGTTCT  
 GGAAACTACC GAACAACCTGC TGGCTGACAG CGCAGACTAT AACGCTCGCG CAGAATTCGC  
 TTGGGCTGCG ACCCTGGCGC TGAACGGTCT GACCTATGCT GGCACCTCCG GTTTCGGTTA

CCCTAACCAC ATGATTGAAC ACGCGCTGTC TGCCTGTTC AACGTACCGC ATGGTGCTGG  
CCTGAGCGTT ATCATGCCTG CATGGATGAA GTGGTTCCAC TCCCAGAACA CTGCTCAGTT  
CGAACGCTTC GCCCAGCACC TGTTTCGGCCT GAACACCGCG GAAGAGGGCA TCGCTGCTCT  
GGAGAAATGG TTCGATAAAA TTGGTACCCC GACTCGTCTG AGCCAGCTGG GCATCAAAGC  
CACTGACCTG CCGGCTATCC TGGACAACCT GGAAGGTAAC GCGCGTTGGT TCGGTCTGGC  
AGAAACTTAT ACCGAGGAAG TACTGGCGAC CATCCTGCGT CTGGCACTGT AAAGTAGTAG  
AGACCGATAC A

**ADH18 (Accession No. F0ERB1\_HAEP)**

GATACAGGTC TCGTCTAGAC ACGACAAGAC AGGGGGCCAA TCCATGTATC CATTCTCCTT  
TCAGAATCCA ACCCGTATCG AGTTCGGTCT GGATAAAGAA AAGGAAATGG GTAAATACAT  
GCACGAATAC GCGCGAAGA AAGCGCTGAT CATCTATGGC AGCGAGCGTG TGAACAATC  
CGGCCTGTTT GAAGACGTTA CCAAGTCTCT GCGTGAACAC GGCATCGAGT ACATCGAATG  
TGGCGGCGTT AAAAGCAACC CGACCATCAG CAAAGTCCGT GAAGCTGTTG CAATGGCCAA  
AGCATTCCGC GCAGATAGCG TGCTGTCTAT TGGTGGTGGT AGCTGCCTGG ACAGCGCGAA  
AGCGATCGCA GCCGGTGCCT GCTACGATGG CGATACTTGG GACTTCTTCA AGGGCACCT  
GGTTCAAAAAG GCGCTGATGA TCTTCGATGT AATCACCTG GCGGCTACGG GTTCCGAAAT  
GAACTGGGGT AGCGTGATCA CCAACGAGGA AACCCAACAG AAATACTCCA TTCACAACAA  
CCATCTGTTT CCTAAAGTTA GCGTAATCAA CCCGAAGCTG CAGGCGACTG TGTCTCGTGA  
TTACTTGTTT TATTCTGCTG CCGATATCAT CGCACACTCT ATCGAAGCGT ATTTCCCGC  
AGAATACCGC CTTGGAGATCA TCGACTTCTT GGTAGAGAGC AACATCAAAA CTGTCTCCG  
TACCACGGAA ATCCTGCTGA ACGACCCGCA GGATCTGAAC GCGCGCGGCG AATTTGCATG  
GGCCGCTACG CTGGCACTGA ATGGCCTGAC CCACCTGGGT ATCAGCCCGT ACGGCTTTCC  
GAACCACATG ATCGAACACA GCATGTCTGC GATTAGCGAC GTTCCGCACG GTGCAGGTCT  
GAGCGTGATC ATGCCGGCGT GGATGCAGTG GTATCAGAGC CAGCGTCCGG CGCAGTTCAA  
ACGTTTTGTC AAAGAAATCT TCGGTCTGGA GAACGCGGAA GAGGGTATCC AGGCGCTGAA  
AACTTGGTTC GACAAAATTG GTACTCCAAC GCGTCTGGAA CAGCTGGGTA TTGACGACAA  
AACCCTGTTT GAAATTGTTG ATAATGCAGT TCAGACTGCC ATCCGTGCCA AAGTTGAAAA  
AACCTACACC AAAGAGGCGA TTAAAGCGAT CTTCCGCCCTG GCAAATAAAA CTAGTAGAGA  
CCGATACA

**ADH19 (Accession No. G5IQ05\_9ENTE)**

GATACAGGTC TCGTCTAGAA TAAGAGCATA CAGGGGGCCT ATTATGCAGA ACTTCCGTTT  
TTACGTTCCG ACCGACATTC GTTTTGGCAC GGACCGTCTG AGCGAACTGC CAGAAGCGCT  
GTCCAGCATC GGCAAACGCG TTCTGCTGGT ATACGGCGGC GGCTCTATCA AAAAGAGCGG  
TCTGTATGAT AAAGTCCAGC AGCAGCTGGT TAAGGGCGGT TTCGAAGTCG TAGAACTGAG  
CGGTATCGAA CCGAATCCGA AAATTCACAG CGTTCGTTCC GGTGTTAAAC TGATCCGCAA  
ACACCAGCTG GAAGTAATCC TGGCGATCGG TGGTGGCAGC GTGATCGATA CTGCTAAAGT  
AATCGCGGCT GCGGTATTCT ATGAAGGCGA CCCGTGGGAC CTGGTTGTCTG ACAGCAGCAA  
AATCAAACAA GCTCTGCCGA TCGTTGACAT CCTGACCCTG GCGGCAACCG GCACCGAAAT  
GAACCGCAAT GCGGTGATTT CTAACGCTGA TACCAAAGAA AAAGTGGGTA CCGGCGGCGC  
TGAAGTGTG CCGCACGTTT CTTTTCTGGA CCCTACCACC ACTTTCTCCG TTTCCAAATG  
GCAGACCGCG GCTGGTGCAG CAGATATCCT GTCCACCTG TTCGAACAGT ACTTCAACCG  
TACCAAAGCT GTCCAAGTTC AAGACAACAT TGCGGAAGCC CTGATGAAGG TAGTAATCGA  
TTTTGCTCCG GTGGCCTTTG AAAATCCTGA CGACTATGGC GCACGTGCGA ACCTGCTGTG  
GGTAGCACC CTGGCTCTGA ACGGCCTGGT TGGCAACGGT CGCTCCGGTG GCTGGACTTG  
CCACCGGATC GAACATGAGC TGTCTGCTTT CTATGATATC ACTCATGGCA TTGGTCTGGC  
TATCCTGACC CCGCGCTGGA TGGCTTACTG TATCACCCAC GACCCAAGCA CCCATGAGAA  
ATTCGCTAAG TATGGTGAAG CTGTGTGGGG CCTGACGGGT GACTCCCAGG CAGAAATCGC  
TCGTAAGGCG GTACGTACTA CTTACGAATT TTTCAAGAC CAGCTGGAAA TTCCGATGAC  
CCTGCAGAAA GTGGGTATCG AAACGACGGA ACTGGTGGAC GAAATGTCTC AGCAGGCGGT  
GGTGCATGGC GAGCTGAACA CTGACGGCCC GTTCGTTCCG CTGGACGAAG AAGCGGTTAA  
AAGCATCATT ACCAGCTGTT TCGAAGAAAT GACTCTGAAC TAAACTAGTA GAGACCGATA  
CA

**ADH20 (Accession No. B2V5D0\_CLOBA)**

|            |            |             |            |            |            |
|------------|------------|-------------|------------|------------|------------|
| GATACAGGTC | TCGTCTAGAC | ATAAAGCTCA  | GAGGACATCA | CACATGGAAA | ATTTCAACTA |
| CTCTATTCCG | ACCGAAATCT | ATTTTCGGTAA | GGGTCAGATC | AAAAACCTGG | GTAATGCCAT |
| CAAAAAGTAC | GGTAGCAAAG | TGCTGGTTGT  | GTATGGCGGC | GGTAGCATCA | AACGTATCGG |
| CCTGTACGAC | GACATGATGA | AAATCCTGAA  | AGACAACAAC | ATCTCTTACG | TTGAACTGTC |
| CAACATCGCA | CCAAACCCGC | GCATCGAATC  | TGTGCGTGAC | GGCGTGAAAC | TGTGCCGTGA |
| TAACGACGTT | GAAGTCGTTT | TGGCAGTCGG  | TGGCGGCAGC | ACGATCGACT | GCGCTAAAGT |
| AATCGCAGCA | GGTGTAAGT  | ATGACAAAGA  | CCCGTGGGAC | CTGGTTCTGG | ACAGCTCTAA |
| AATGACCACG | GTTCTGCCAG | TTATCACTAT  | TCTGACCCTG | AGCGCAACCG | GTTCTGAAAT |
| GGACCCATT  | GCAGTGATCT | CTGACATGAG  | CAAAAACGAA | AAGGTAGGCG | TGGGTAACGA |
| TAAAATGAAA | CCGAAAGTGT | CTATCCTGGA  | CCCGGAATAC | ACCTACAGCG | TTCCGAAAAA |
| CCAAACCGCG | GCGGGCACGG | CTGATATCAT  | GTCCCACATC | TTCGAAAAC  | ACTTCAACAA |
| CACGAAAGGC | GCCCTTATCC | AGGCACGCAC  | TGCTGAAGGT | CTGCTGAAAG | CTTGTATGAA |
| ATATGGCAAG | ATCGCCATCG | AGGAACCAAA  | CAACTACGAA | GCTCGTGCAA | ACCTGATGTG |
| GGCATCCAGC | CTGGCCATTA | ACGGCCTGAT  | CTCTTACGGC | ACCGCGGGTG | CGTGGAGCGT |
| CCACCCGATG | GAACACGAAC | TGTCTGCATT  | CTACGACATT | ACGCATGGTG | TCGGTCTGGC |
| GATCCTGACC | CCGCATTGGA | TGCGCTACGT  | CCTGAACGAA | GATACTCTGG | ACAAATTCGT |
| TGAATATGGC | ATTAACGTGT | GGGAGCTGGA  | CAAAAACCTG | GACAAATATA | CCATCGCGAA |
| CACTGCGATC | GATAAAACGG | CAGAATTTTT  | CAAGGAAATG | GGTATTCCGA | GCACTCTGCG |
| CGAAGTGGGT | ATTGGCGAGG | AGAACTTCAA  | AATCATGGCG | CAAAAAGCGG | TTAAAAGCGG |
| CCTGGAATAC | GGTTTCAAAC | CGCTGGCTCC  | GGAAGATGTG | GTTAACATCT | ACAAAGCTGC |
| TCTGTAAACT | AGTAGAGACC | GATACA      |            |            |            |

**ADH21 (Accession No. E2SME8\_9FIRM)**

|            |             |            |             |            |            |
|------------|-------------|------------|-------------|------------|------------|
| GATACAGGTC | TCGTCTAGAA  | ACACACGACG | GGGAGGGGAC  | GCAATGACCG | AAGCGATGGA |
| AAACTTCATT | TACGATATCC  | CGACCAAAGT | TTACTTTGGC  | AAAGGTCAGC | TGAACCAGCT |
| GGCAGATATC | GTGCAGGTCT  | ATGGCCAGCG | TGTTCTGCTG  | GTTTATGGTG | GCGGTTCCAT |
| TCAACGTAAC | GGCATTATATG | ACGCAGCAGT | TGCACAACCTG | AAAAAGGCGG | GTAAGAAGTA |
| CACCGAACTG | TCTGGTGTG   | AACCGAATCC | GTCCATCCAC  | ACGGTCGAAA | AAGGTGTTAT |
| GCTGTGCCAG | CGTGAACAGA  | TCGACATGCT | GGTAGCTATT  | GGTGGCGGCA | GCGCTATCGA |
| TTGTGCCAAG | GTGATCAGCG  | CCGCCGCCTG | CTCCACCCGT  | CGTCCGTGGG | AAGTGGTTAC |
| GCACCCAGAG | GAAATTCAGC  | GCGCGCTGCC | GGTTATCGCC  | GTTCTGACCA | TCGCTGCAAC |
| CGGTAGCGAA | ATGGATCACA  | TTGCTGTGAT | CACGAATCCG  | CAAACCAAAG | AGAAAATTGG |
| CACCCGTCAC | CCGCTGCTGC  | GTCCGAAAGC | CGCTATCCTG  | GATCCGAGCT | TCACTTTCTC |
| TGTTAACGCT | TACCAAAGCG  | CCTGTGGCGT | GGCTGACATC  | ATGTCTCATA | CGATGGAGTC |
| CTATTTTGCC | CGTAAAGAAG  | CAGCCCTGCA | AGATCGTTTC  | GCAGAGGGTA | TTCTGAAGAT |
| CTGCCTGACC | TACGGCCCCGA | TCGTGCTGCA | GCAGCCGGAT  | AATTACGAGG | CGCGTAGCAA |
| CCTGATGTGG | GCAGCTTCTT  | GGGCTATCAA | CGATCTGCTG  | AAACTGGGTC | ACATGACTCA |
| GTGGTCCGTG | CACCCGATGG  | AACACCCGCT | GAGCGCGTTC  | TACAGCGTTA | CTCAGGCTGA |
| AGGTCTGGCG | ATTCTGACCC  | CGCATTGGAT | GGATTACGTC  | CTGTCTGAAG | TACCCGTTGG |
| TAAATTCGCG | TGTTTCGCTC  | GCGAAGTATG | GCAGGTTTCGT | GAAATGGATC | CATGGGACAT |
| GGCTCGTGAG | GGCATCGAAC  | GCCTGCGTGG | TTTCTACAAA  | CAGCTGCAGC | TGCGCAGCAG |
| CCTGGGCGAA | CTGGGCATCG  | ACGAAACCCA | CTTTGACGCT  | ATGGCAGCAG | ACGCAGCCAA |
| ACAAACCGTT | AACGGTTACG  | TTGCACTGCT | GGCAGAAGAT  | GTCAAGAACA | TCTACCGTAA |
| CTCCCTGTAA | ACTAGTAGAG  | ACCGATACA  |             |            |            |

**ADH22 (Accession No. B0NYL0\_9CLOT)**

|            |            |             |            |            |            |
|------------|------------|-------------|------------|------------|------------|
| GATACAGGTC | TCGTCTAGAT | TAAAATCCTC  | CAGAGGTCAA | TCCATGAATA | ACTTCACTTA |
| CAGCATCCCG | ACTAAGATT  | ACTTTCGGCAA | AGGTCAGATC | TCCCACCTGT | CTGAGCTGTC |
| CGAGTCTGGC | AACAAAGTTC | TGCTGTGCTA  | TGGCGGCGGC | AGCATCAAGA | AAGCGGGCAT |
| CTATGACGAA | GCCGTGAAAA | TCCTGAAAGA  | AGAAGATATG | GAAATCTTCG | AACTGTCTGG |
| TATTGCACCG | AACCCGAAAA | TCGAAAGCGT  | ACGTGAGGGT | GTGAAACTGT | GCAAGGAGAA |
| CTCCATTGAT | ATGGTTCTGG | CTATCGGCGG  | CGGCTCCGTA | ATCGATTGTG | CTAAAGTCGT |
| AGCCGCTGGT | GCCTGTTATG | ACGGCGACCC  | GTGGGACCTG | GTTATTACCC | CGCGTTGGAT |
| CAAAAAGGCA | CTGCCGATTT | ACTCCGTACT  | GACTCTGAGC | GCGACCGGCT | CCGAGATGGA |
| TAAATTCGCA | GTAATCTCTG | ACATGTCTAA  | AAACGAAAAA | TGGGGTACTG | CGTCTGATCA |
| CATGAAGCCG | AAAATGTCTA | TTCTGGACCC  | GGAATACACG | TATTCTGTTA | GCAAAAAACA |

AACTGCCGCG GGTACCGCGG ATATCATCTC TCATATCTGC GAAAACACTACT TCACGAACGT  
TAAAAACGCA GATGTGCAGG CTCGCTTCGC GGAAGGTCTG CTGAAAAATT GCTTTAAGTA  
TGGCCCGGTT GCCCTGGAAG AACCGGATAA TTATGACGCT CGTGCGAACC TGATGTGGAC  
CGCATCTATG GCGATTAACG GTATGATTCA GTACGGCGCT GAAGTGGCGT GGTGTGTACA  
TCCGATGGAA CATGAACTGT CCGCGTTCTA TGATATCACC CACGGTGAAG GTCTGGCAAT  
TCTGACCCCG CATTGGATGG AGTTTTCGCT GAACGATGAT ACCGCTTATA AATTCGCTGA  
TTACGCACGC AACGTTTGGG ACGTTGTAA CGACGACGAC ATGGCCGCAG CAAAAGAGGG  
TATCGCGTAC ACTCGCGAAT ACTTTAAAAA GATGGGTCTG CCGCAGACCC TGACCGACGT  
GGGTATCGAT AAAGAATATT TCGACATCAT GGCTCAGAAA GCTGCGGATG GCTGCAAGGG  
CAGCTTCGTG CCACTGAGCA AAGAAGACAT CGTTTCCATC TATGAAGCTG CCCTGTAAC  
TAGTAGAGAC CGATACA

## E2. Secondary ADH sequences

### sADH1 (Accession No. KGK36767.1)

ATGTTTCATGA AAGGTCTGAC GTATCTGAAG CCGGGCATTG TATCCTGGCA AAGCATCCCCG  
AAACCGGTTT TGAAAAAACC GACTGACGTG ATTGGTAAAG TTGTCACCAC TACCATCTGC  
GGCTCCGACC TGCACATTCT GAAAGGTGAT GTTCTTGAGA CCACCGCGCT GGCGGCCACT  
ACGGGTCATG GTGTGGTCCT GGGCCACGAA GCCATCATCG AAATTGAATC TGTAGGCGAC  
GCTGTGAAAA ACTTTAGCAA AGGCGACGTT TGTATCGTAT CCTGCATCAC CTCTTGTGGT  
AAATGCTACT ACTGCAAACG CAACCTGCAG TCTCACTGTA CCGGCCACAT GGAAGGCACT  
TCCGGTTGGG TGTTCCGGTCA TGAATTCGAT GGCACCCAGG CCGAATACGT GCGTGTTCGG  
TGCGCTGATT ATGGCCTGTA CAAGTTTCTT GAAGGCGTTG CGTACGAAAA ACTGTGATG  
CTGTCCGACG CCATTTCAAC CTCCTACGAA ATCGGCATCC TGAATGGCGA GGTGAAGGAA  
GGCGACTCCG TTGCTGTTGT CCGCCTGGGT CCGGTAGGTC TGAGCGCACT GCTGACCGCA  
ATTAACAAAA AACCGAAACA ACTGATCGCA ATCGACATGG ACGAGAACCG TCTGGACCTG  
GCTAAGCAGC TGGGTGCGAC GCATATCATC AACTCCACCA ACATGCCGAA CGAAGAGGTC  
GCGAAGAAAG TGCAGGAGAT CAGCAAAGAC CTGGAACCGG GCCGTGAATC CGGCGTGGAC  
GTCGCTATTG AATGTGTGGG CGTCCCTCCG ACCTTCGAGC TGTGTGAAGA CCTGATCGCA  
TCTGGTGGCA CTATTGCTAA CGTGGGCGTC CACGGTGCAG AAGTAGACCT GAAACTGCAA  
GAACTGTGGA TCAAGAACTG TAAGATTACC ACGGGTCTGG TGAGCACCTA CTCCATCCCCG  
GACCTGCTGA ACCAGTTGC AGACGGTTCC CTGGACCCTA GCCCAATCAT TACCCATCAC  
TTCAAATTTG ACGAATTCGA GAAAGCTTAC CAGGTTTTCA AAGACGCTAA AAATACCAAA  
GCGATGAAAA TTATTCTGAC GCCG

### sADH2 (Accession No. WP\_011011186.1)

ATGTCTAAGA ACTACAAAA GCACCAGGCA TATATCGCAG GTCGCGACAA AATGAAAGTT  
GCTGTTATTA CTGGTGCTTC TCGTGGCATC GGCGAAGCTA TTGCTAAAGC CCTGGCGGAA  
GATGGCTACT CTCTGGCGCT GGGTGC CGC TCCGTTGACC GTCTGGAAAA AATCGCAAAA  
GAGCTGAGCG AGAAACACGG TGTGGAAGTC TTTTACGATT ATCTGGACGT GTCCAAACCG  
GAATCTGTAG AAGAATTTGC ACGCAAAACG CTGGCACACT TCGGTGACGT TGATGTTGTT  
GTGGCGAACG CCGGTCTGGG TTATTTTCGGT CGCCTGGAAG AGCTGACCGA AGAACAGTTC  
CACGAAATGA TCGAAGTTAA CCTGCTGGGC GTTTGGCGTA CCATCAAAGC ATTCCTGAAC  
TCCCTGAAAC GTACTGGTGG CGTTGCGATC GTCGTTACCT CCGATGTCTC CGCTCGTCTG  
CTGCCGTACG GCGGCGGTTA TGTCGCAACG AAATGGGCAG CTCGCGCGCT GGTACGCACG  
TTCCAGATCG AAAACCCTGA CGTGCCTTTC TTCGAACTGC GTCCGGGTGC TGTTGACACC  
TACTTCGGCG GTAGCAAAGC CGGCAAACCG AAGGAGCAGG GCTACCTGAA ACCGGAAGAA  
GTTGCGGAAG CAGTTAAATA CCTGCTGCGT CTGCCGAAGG ACGTTTCGTGT TGAGGAGCTG  
ATGCTGCGCT CTATTTACCA GAAACCGGAA TAC

### sADH3 (Accession No. WP\_011614641.1)

ATGAAAATCT CTCTGACTTC CGCACGTCAG CTGGCCCGTG ATATCCTGGC CGCGCAGCAG  
GTGCCGGCCG ATATCGCGGA CGACGTGGCT GAACATCTGG TTGAATCTGA CCGTTGTGGC  
TATATCTCCC ACGGCCTGTC TATCCTGCCG AACTATCGTA CTGCGCTGGA CGGCCACTCT

GTTAACCCGC AAGGTCGTGC AAAATGTGTG CTGGATCAGG GTACCCTGAT GGTCTTCGAC  
 GGCGATGGTG GTTTTGGTCA ACACGTAGGC AAATCTGTTA TGCAGGCTGC GATTGAACGC  
 GTTCGTCAGC ACGGTCACTG TATCGTTACC CTGCGTCGTT CCCACCACCT GGGTCGCATG  
 GGCCACTACG GCGAAATGGC AGCTGCTGCG GGCTTTGTTC TGCTGTCCTT CACCAATGTG  
 ATCAACCGTG CGCCAGTTGT GGCGCCGTTT GGCGGTCGTG TTGCCCGTCT GACTACTAAC  
 CCGCTGTGCT TTGCTGGCCC GATGCCAAAC GGCCGCCCGC CTCTGGTAGT TGACATCGCA  
 ACCAGCGCCA TCGCCATCAA CAAAGCTCGC GTTCTGGCCG AAAAAGGCGA ACCAGCACCA  
 GAAGGCTCTA TCATCGGTGC GGATGGTAAC CCGACCACCG ATGCCTCTAC CATGTTTGGT  
 GAACACCCGG GTGCTCTGCT GCCATTCGGT GGTCACAAAG GTTATGCACT GGGTGTGTGA  
 GCTGAAGTGC TGGCAGGTGT GCTGAGCGGT GGCGGTACGA TCCAGCCGGA CAACCCGGCT  
 GGCAGTGTGG CGACTAACAA CCTGTTGCTT GTTCTGCTGA ACCCGGCGCT GGATCTGGGC  
 CTGGACTGGC AGAGCGCTGA AGTTGAGGCT TTCGTTGCTT ACCTGCATGA TACCCCGCCG  
 GCCCCGGGTG TTGACCGTGT TCAGTACCCG GGCGAATATG AAGCAGCGAA CCGTGCGCAG  
 GCTTCCGACA CGCTGAACAT CAACCCGGCG ATCTGGCGCA ACCTGGAGCG CCTGGCGCAG  
 TCTCTGAACG TCGCAGTACC GACCGCT

**sADH4 (Accession No. P14941.1)**

ATGAAGGGTT TCGCTATGCT GTCCATCGGC AAGGTGGGCT GGATTGAAAA AGAGAAACCG  
 GCGCCTGGTC CGTTCGACGC CATTGTTCCG CCGCTGGCCG TAGCGCCGTG TACCTCTGAT  
 ATCCACACTG TGTTTCGAGGG TCGGATTGGC GAACGCCACA ACATGATCCT GGGCCACGAG  
 GCGGTTCGGCG AAGTAGTGA AGTTGGTAGC GAGGTAAAGG ATTTCAAACC GGGCGATCGC  
 GTCGTTGTGC CGGCAATCAC TCCGGATTGG CGTACTAGCG AAGTACAGCG CGGTTACCAT  
 CAGCACAGCG GCGGCATGCT GGCGGGCTGG AAATTCAGCA ATGTTAAAGA CGGTGTTTTC  
 GGTGAATTTT TCCACGTGAA CGACGCCGAT ATGAACCTGG CGCACCTGCC GAAAGAAATT  
 CCGCTGGAAG CAGCGGTTAT GATCCCGGAC ATGATGACTA CTGGCTTCCA CGGTGTGAA  
 CTGGCTGATA TTGAACTGGG TGCGACCGTA GCAGTACTGG GCATCGGTCC GGTGGGCTG  
 ATGGCAGTGG CCGGCGCTAA ACTGCGTGGT GCGGGTCGCA TCATCGCCGT TGGCTCCCGC  
 CCGGTGTGCG TCGACGCTGC GAAATACTAT GGC GCGACGG ATATTGTTAA CTACAAAGAC  
 GGCCCCGATTG AATCTCAGAT CATGAACCTG ACTGAAGGTA AAGGTGTTGA CGCTGCTATC  
 ATCGCCGGCG GCAATGCAGA CATCATGGCG ACTGCCGTGA AAATTGTGAA ACCGGGTGGT  
 ACCATCGCGA ACGTTAACTA TTTTCGGTGAG GGTGAAGTTC TGCCAGTACC GCGTCTGGAG  
 TGGGGTTGTG GCATGGCCCA TAAAACCATC AAAGGTGGCC TGTGTCCGGG CGGTCGTCTG  
 CGCATGGAAC GTCTGATTGA CCTGGTCTTC TATAACGTG TGGACCCGTC TAAACTGGTC  
 ACCCACGTAT TCCGTGGCTT CGATAACATT GAAAAAGCTT TCATGCTGAT GAAAGACAAA  
 CCGAAAGACC TGATTAAGCC GGTAGTCATC CTGGCG

**sADH5 (Accession No. AAA23199.2)**

ATGAAAGGCT TCGCTATGCT GGGTATCAAC AAAGTGGGTT GGATCGAAAA GGAACGTCCG  
 GTGGCAGGCT CTTACGATGC TATTGTTCTG CCACTGGCTG TCTCTCCGTG CACCTCCGAT  
 ATCCACACTG TCTTTGAGGG CGCGCTGGGT GATCGTAAAA ACATGATCCT GGGCCACGAA  
 GCAGTCGGCG AGGTCGTTGA AGTTGGTTCT GAGGTGAAAG ACTTCAAACC AGGCGATCGT  
 GTTATCGTTC CGTGTACCAC CCCGGACTGG CGCTCTCTGG AAGTACAAGC AGGCTTCCAG  
 CAGCATAGCA ATGGTATGCT GGCAGGCTGG AAGTTCAGCA ACTTTAAGGA CGGTGTGTTC  
 GGCGAATACT TCCACGTTAA CGACGCAGAT ATGAACCTGG CGATCCTGCC GAAAGATATG  
 CCGCTGGAAG ACGCGGTTAT GATCACCGAC ATGATGACTA CCGGCTTCCA CGGTGCAGAG  
 CTGGCTGACA TCCAAATGGG TTCTTCTGTC GTGGTGATCG GCATCGGCGC TGTGGCCTG  
 ATGGGCATCG CTGGCGCTAA GCTGCGCGGC GCGCGCCGTA TTATCGGCGT TGGCAGCCGT  
 CCGATCTGCG TGGAAGCTGC TAAATTCTAT GGCGCCACCG ACATTCTGAA CTACAAAAAT  
 GGTCACATCG TGGATCAGGT GATGAAACTG ACCAACGGTA AAGGTGTAGA CCGTGTAAATC  
 ATGGCAGGTG GTGGTTCTGA AACCCTGAGC CAGGCGGTAT CTATGGTGAA ACCGGGTGGC  
 ATCATCTCCA ACATCAACTA TCACGGCTCT GGCGATGCGC TGCTGATCCC GCGTGTGGAG  
 TGGGGTTGCG GTATGGCTCA TAAAACCATC AAGGGCGGCC TGTGTCCGGG CGGTCGTCTG  
 CGCGCAGAAA TGCTGCGCGA TATGGTGGTA TATAACCGTG TAGACCTGAG CAAGCTGGTT  
 ACCCATGTTT ATCACGGTTT CGACCACATC GAGGAAGCCC TGCTGCTGAT GAAAGACAAA  
 CCTAAAGATC TGATCAAAGC TGTTGTAATT CTG



**sADH6 (Accession No. XP\_455102.1)**

ATGCGCGCAC TGGCTTATTT CGGCAAGCAG GATATCCGTT ACACCAAGGA TCTGGAAGAA  
CCGGTTATCG AGACCGACGA CGGCATCGAA ATTGAAGTCA GCTGGTGCGG TATCTGTGGC  
TCCGACCTGC ACGAATATCT GGATGGTCCG ATTTTTTTTCC CTGAAGATGG TAAAGTGCAT  
GACGTTAGCG GTCTGGGCCT GCCACAGGCG ATGGGTCACG AGATGTCTGG CATCGTATCT  
AAAGTGGGCC CGAAAGTTAC CAACATCAAA GCTGGTGACC ACGTGGTCGT CGAGGCAACT  
GGCACTTGTC TGGATCATTACACCTGGCCG AACGCGGCTC ATGCGAAAGA TGCTGAATGC  
GCGGCGTGCC AGCGTGGCTT TTACAACCTGC TCGCGCCACC TGGGTTTCAT GGGTCTGGGT  
GTTTACAGCG GCGGTTTTGCG GGAAAAAGTG GTGGTGAGCG AGAAACATGT TGTTAAGATC  
CCGAACACCC TGCCGCTGGA CGTTGCAGCT CTGGTCGAAC CAATTTCTGT CTCCTGGCAC  
GCGGTTTCGTA TCAGCAAGCT GCAAAAAGGC CAATCTGCTC TGGTGCTGGG CGCTGGCCCA  
ATTGGCCTGG CCACCATCCT GGCGCTGCAG GGTACCGGTG CAAGCAAAAT CGTTGTATCC  
GAACCAGCGG AAATCCGTCG CAATCAAGCA GCAAAACTGG GCGTTGAAAC GTTCGATCCG  
TCCGAACACA AAGAAGACGC GGTTAACATC CTGAAGAAAC TGGCACCGGG TGGTGAGGGT  
TTGATTTTCG CCTACGACTG TAGCGGTGTC AAACCTACCT TTGATACTGG TGTACACGCT  
ACCACCTTCC GCGGTATGTA CGTGAACATC GCAATTTGGG GTCATAAACC GATCGATTTT  
AAACCGATGG ACGTGACTCT GCAGGAGAAG TTCGTACCGG GTTCCATGTG CTACACCATT  
AAGGATTTTC AAGATGTGGT TCAGGCTCTG GGTAACGGCT CCATCGCCAT CGACAAGGCG  
CGCCACCTGA TTACTGGCCG CCAGAAAATT GAAGATGGCT TCACCAAAGG CTTTCGACGAA  
CTGATGAACC ATAAAGAAAA AAACATCAAG ATCCTGCTGA CTCCTAATAA CCACGGCGAA  
CTGGACGCGA CCAAC

**sADH7 (Accession No. AAP39869.1)**

ATGAAAGCAG CCGTGTTCAA AGGTAAGAAC CGTATCGTAC TGGATGAAAA GCCGGTGCCG  
GTGCCAAAAC ATAGCGAAGC GCTGATTAAT ATCACTACCA CTACCATCTG CCGTACCGAC  
ATTCACATCC TGAAGGGCGA ATACCCGGTA GCGGAAGGCC TGACCATTGG CCACGAACCG  
ATCGGTGTGA TTGAGAGCTT CGGCGACGGT GTTACCGGCT TCAAGAAAGG CCAGCGTGT  
GTTATTGGCG CTATCACGCC GTGCAGCTCT TGTAGCAGCT GTATGGAAGG CATCCGTTCT  
CAGTGTGGCA GCAAACGTAT GGGCGGCTGG AAATTTCGGTA ATACCATCGA TGGCTCTCAG  
GCGGAATATC TGATCGTGCC GGACGCTGCA CGGAACATGT ACCCTATTCC GGATGGTATT  
ACCGATGAAC AGGTGCTGAT GTGTCCGGAC ATTATGTCCA CTGGTTTCTC CGGTCCAGAA  
TCTGCCGGTG TGAAAGTGGG TGACACCGTC GTTATTTATG CTCAGGGTCC GATCGGTCTG  
GGCGTACCG CGGGTGCCAA AATGATGGGC GCAACGAAAG TAATTGTTGT AGATCGTTTC  
CCGGAGCGTC TGGCGCTGGC AAAAAAGCTG GGCGCGGATT ATACGCTGGA TTTACCAAAA  
TGTAACCCTA TTGAAGAAGT GATGCGTCTG ACTGGTGGTC GTGGCGTTGA CGTTGCAATT  
GAAGCGCTGG GTCTGCAGTC CACCTTTGAG TCTTGCCTGC GTTGCCTGAA ACCGGGCGGT  
GTGCTGAGCA GCCTGGGTGT CTATTCTGAT GACCTGCGTC TGCCGAACGA CGTTTTCGCT  
GCGGGCCTGG GCGACTTCAA GATCGTTACT ACCCTGTGTC CTGGCGGCAA AGAGCGTATG  
CGTCGTCTGC TGTCTGTAAT CGAGTCTGGC CGTGTTGACA TGCGCCCGAT GGTGACTCAC  
ACCTTTAAGC TGGATGAAAT CGAAAAAGCC TACGACCTGT TCGGTAACCA GCGCGATGGC  
GTTCTGAAAG TAGCCATCAA GCCG

**sADH8 (Accession No. Q0KDL6.1)**

ATGACCGCGA TGATGAAGGC AGCGGTATTT GTTGAACCTG GTCGTATTGA ACTGGCGGAT  
AAACCGATTG CCGATATCGG TCCGAACGAC GCACTGGTTC GCATTACCAC CACCACTATT  
TGCGGCACCG ACGTTACAT CCTGAAGGGC GAATATCCGG TTGCTAAGGG CCTGACCGTG  
GGCCACGAGC CGGTTGGCAT CATCGAGAAA CTGGGCAGCG CAGTAACGGG CTATCGCGAA  
GGTCAGCGTG TAATCGCAGG TGCGATCTGT CCTAACTTCA ACTCTTACGC GGCGCAGGAT  
GGTGTTCGCT CTCAGGATGG CAGCTACCTG ATGGCTTCTG GCCAGTGCAG CTGTCATGGT  
TACAAAGCAA CCGCCGGCTG GCGTTTTGCGT AATATGATTG ACGGTACCCA GGCTGAATAT  
GTTCTGGTAC CCGATGCGCA GGCCAACCTG ACCCCGATTC CGGACGGCCT GACGGACGAA  
CAGGTCCTGA TGTGTCCGGA TATTATGTCC ACCGGTTTCA AAGGTGCGGA GAACGCAAC  
ATTGCGATTG GTGACACCGT TGCGGTGTTT GCGCAGGGTC CGATCGGTCT GTGCGCGACT  
GCTGGTGCGC GTCTGTGCGG CGCAACTACT ATCATCGCTA TCGACGGCAA CGATCATCGT  
CTGAAATCG CCGCAAAAT GGGTGCAGG GTTGTGCTGA ACTTCCGTAA CTGCGACGTG

GTCGACGAGG TGATGAAACT GACCGGCGGT CGTGGTGTGG ATGCGTCTAT TGAAGCACTG  
GGTACCCAGG CGACCTTCGA ACAATCTCTG CGTGTTCTGA AGCCGGGTGG TACGCTGTCT  
TCTCTGGGTG TCTACTCCTC TGATCTGACT ATCCCGCTGA GCGCCTTCGC AGCCGGTCTG  
GGCGACCACA AAATTAACAC CGCCCTGTGC CCGGGTGGCA AAGAACGTAT GCGTCGTCTG  
ATTAACGTTA TCGAATCCGG TCGCGTGGAC CTGGGTGCGC TGGTAACCCA CCAGTATCGC  
CTGGATGATA TCGTTGCGGC GTACGACCTG TTCGCTAACC AGCGTGATGG TGTCTGAAA  
ATCGCCATCA AACCGCAC

**sADH9 (Accession No. XP\_001580601.1)**

ATGACCTTCG AACTGCCGAA AACTATGAAA GCGTTTGC GA TGCGCAAGAT CCGTGAAGTC  
GGCTGGATTG AAAAGCCGGT GCCAGAATGC GGTCCGAACG ATGCAATCTG CCGTCCGCTG  
GCTCTGGCTC CGTGCACCTC TGACATTCAC ACTGTGTGGG CGGGTGCGAT CCGTGAACGC  
CATGACATGA TCCTGGGCCA TGAAGCCGTT GGCCAAGTTG TTAAAATCGG TTCCGAAGTT  
AAAAACCTGA AAGTTGGCGA TAAGGTTCTG GTTCCGGCAG TAACTCCGGA TTGGGGTAGC  
GAAGCAGCAC AGGAAGGCTT CCCGGCACAC TCCGGCGGTA TGCTGGGTGG TTGGAAATTT  
TCCAACCTCA AAGATGGCGT TTTTGCTGAA TACTTCCACG TCAACGAAGC CGACGCTAAC  
CTGGCCAAAC TGCCGGAAGG TCTGACGCCG CGTGATGTAA TCATGTGCAG CGACATGATG  
ACTACCGGTT TCCATGGTGC AGAACTGGCG GAGGTTAAGC TGGGTGATAT CGTAGTAGTT  
ATCGGTATCG GTCCGGTTG TCTGATGCTT GTACGTGGCG CTGCTCTGAT GGGCGCAAGC  
CGTATCTTCG CAGTCCGTTT CCGTCCGCAC TGCTGCGACA CCGCAGTCCA GTACGGTAGCC  
ACTGACATCA TCAACTATAA AAATGGTGAT ATCGTGGAAC AGATCCTGAA AGCTACTGGC  
GGTAAAGGCG TTGATCGTGT GATTATCGCG GGTGGCGACG TCCATACTTT CGCGCAAGCT  
ATTAATAATGA TCCGTGCTGG CGGCGTTATC GGCAACGTGA ACTACCTGGG CGAAGGTGAA  
ATGATCGACG TACCGCGTGT AGAATGGGGT GTTGGCATGG GTCACAAATT CATCCACGGT  
GGTCTGACCC CGGGTGGTGC ACTGCGTATG GAAAAAATGG CTAACCTGAT CAAGTATAAA  
AAAGTCGATC CGACGAAACT GATTACCCAT GAATTCAAGG GTCTGGAAAA AGTTGAAGAT  
GCTCTGATGC TGATGAAAGA CAAACCGGTT GACCTGATCA AACC GGTTGT TCTGATTGAA  
TACAACGACA AACTG

**sADH10 (Accession No. AJP52792.1)**

ATGATGGCGA CCATGAAAGC AGCGATCTTT GTTGAAAAAA ACCGTATTGT TCTGGAAGAC  
AAACCAATCC CGGAAGTTGG CCCGCTGGAT GCACTGATCC GTATCACCAC CACTACGATT  
TGCGGCACCG ATGTTACAT CCTGCGCGGT GAGTATCCGG TAGCGAAGGG TCTGACGATC  
GGTCATGAAC CAGTAGGTAT TATCGAACGT CTGGGTTCCC AGGTTTCGTGG TTTCTGAGAA  
GGTCAGCGTG TTATTGCAGG CGCGATCACC CCGTCTGGCC AAAGCTACGC ATGCCTGTGT  
GGCTGTGCCA GCCAGGACGG TCCGGATACC CGTCACGGTT TTCGTGCGAC CGGCGGCTGG  
AAATTCGGCA ACATTATCGA CGGCTGCCAG GCGGAGTATG TACTGGTGCC AGACGCGCTG  
GCGAACCTGT GCCCAATTCC GGATGGCCTG AGCGACGAAC AAGTTCTGAT GTGCCCGGAC  
ATCATGTCCA CTGGTTTCTC TGCGCGAGAA CGTGGCGAAA TTAACATTGG TGATACTGTT  
GCGGTATTTC CACTGGGTCC GATCGGCCTG TGTGCTGTGG CGGGCGCCCG TCTGAAGGGT  
GCGACCACCA TCATCGGTGT GGACGCAGTG GCTCAGCGTA TGTCTGTTGC ACGTCAGCTG  
GGCGCCACCC ACGTGGTAAA CTTCAAAGAG GCGAACGTTG TGGAACAGAT TATGGCGCTG  
ACGGACGGCC GTGGTGTGTA TGTATCTATC GAAGCACTGG GCACCCAGGG CACCTTCGAA  
TCTGCTCTGC GTGTCCTGCG CCCGGGCGGT CGCCTGTCCT CCCTGGGTGT TTATTCCAGC  
GACCTGCGTA TCCCGCTGGA CGCCTTCGCG GCAGGCCTGG GCGATTACTC CATCGTCACT  
ACCTGTGTC CGGGTGGCAA AGAGCGTATG CGTCGCCTGA TGGCCGTAGT TCAGAGCGGC  
GCGGTCGACC TGTCTCCGCT GGTCACTCAC CACTTCAAGC TGGATGACAT CGAAGCGGCA  
TATGAACTGT TTGCGAACCA GCGTGATGGT GTAATGAAAG TTGCAATCAC CCCC

**sADH11 (Accession No. WP\_011835462.1)**

ATGTCTAAAG TGGCTGCCGT GACCGGTGCA GGTCAGGGCA TTGGTTTTGC AATCGCGAAA  
CGCCTGTATA ACGACGGTTT CAAAGTAGCC ATCATCGATT ACAACGAAGA AACCGCTCAG  
CAGGCTGCGA AAGAACTGGG TGGTGAATCT TTCGCGCTGA AGGCGGATGT TTCTGACCGT  
GACCAGGTAG TCGCCGCGCT GGAAGCTGTT GTTGAAGAAAT TCGGTGATCT GAACGTGGTA  
GTAAACAACG CGGGTATCGC CCCGACTACC CCGATCGAAA CGATCACCC GGAACAGTTT

CACCAGGTGT ACAACATCAA TGTTGGTGGT GTGCTGTGGG GTACCCAGGC TGCTACTGCT  
 CTGTTCCGTA AACTGGGCCA CGGCGGTAAG ATTATCAACG CCACCTCCCA GGCTGGTGTG  
 GTCGGTAACC CGAACCTGAT GCTGTACAGC AGCTCCAAAT TCGCTGTCCG CGGCATGACC  
 CAGATCGCAG CACGTGACCT GGCAGAAGAG GGTATCACCG TCAACGCCTA CGCTCCAGGC  
 ATTGTGAAAA CCCCAGATGAT GTTCGATATC GCTCATCAGG TGGGTAAGAA CGCCGGCAAA  
 GACGACGAGT GGGGTATGCA GACCTTCGCT AAAGACATCG CGATGAAACG TCTGAGCGAG  
 CCGGAAGATG TAGCAAACGT TGTTTCCTTT CTGGCCGGCC CGGATTCCAA CTACATCACC  
 GGCCAGACTA TCATTGTAGA CGGTGGCATG CAATTTTCAT

**sADH12 (Accession No. AAC04974.1)**

ATGCGTGC GC TGGCCTATTT CAAGAAAGGT GACATTCACT TCACTAATGA CATCCCACGT  
 CCGGAAATCC AGACGGACGA CGAAGTTATC ATCGATGTGT CTTGGTGC GG CATCTGTGGT  
 TCTGACCTGC ACGAATACCT GGATGGCCCG ATCTTTATGC CGAAAGACGG TGAGTGCCAC  
 AAAGTGGTGC CGAAAGTTAC TAAAGTAAAA GTGGGTGATC ACGTAGTTGT TGATGCGGCC  
 AGCTCCTGCG CCGACCTGCA CTGCTGGCCG CACTCCAAAT TTTATAACTC TAAGCCGTGT  
 GACGCATGTC AGCGTGGTTC CGAAAACCTG TGCACCCACG CGGGCTTTGT AGGTCTGGGC  
 GTCATTAGCG GTGGCTTCGC GGAGCAGGTA GTTGTATCTC AACACCACAT CATCCCGGTT  
 CCGAAGGAGA TCCCCTGGA CTTGCAGT CTGGTTGAAC CGTGAGCGT TACTTGGCAT  
 GCAGTGAAAA TTTCTGGTTT CAAAAAAGGT TCTTCCGCAC TGGTTCTGGG CAGCAGTCCG  
 ATCGGTCTGT GCACCATCCT GGTTCTGAAA GGCATGGGTG CATCCAAGAT TGTCGTATCC  
 GAAATTGCGG AGCGCCGTAT TGAAATGGCG AAAAAGCTGG GTGTTGAAGT ATTCAACCCG  
 TCTAAACACG GCCACAAATC CATTGAGATC CTGCGTGGCC TGACCAAAAAG CCATGATGGC  
 TTTGACTACA GCTATGATTG CTCTGGCATC CAGGTGACTT TCGAAACTTC TCTGAAAGCG  
 CTGACTTTCA AAGGTACCGC TACCAACATT GCAGTGTGGG GCCCGAAACC GGTTCCATTC  
 CAGCCGATGG ATGTCACCCT GCAGGAAAAA GTAATGACCG GCTCCATTGG TTACGTTGTG  
 GAAGATTTTC AAGAAGTTGT GCGTGCTATT CATAACGGCG ATATTGCTAT GGAAGATTGT  
 AAGCAGCTGA TCACCGGTAA ACAGCGTATC GAAGATGGTT GGGAGAAAGG CTTTCAGGAA  
 CTGATGGATC ACAAAGAATC TAACGTAAAA ATTCTGCTGA CTCCAACAA CCACGGTGAA  
 ATGAAA

**sADH13 (Accession No. WP\_000374004.1)**

ATGGATCGTA TCATTCAGTC TCCTGGCAAA TACATCCAGG GCGCAGATGT GATCAACCGT  
 CTGGGTGAAT ATCTGAAACC GCTGGCAGAG CGTTGGCTGG TGGTTGGCGA TAAATTCGTG  
 CTGGGCTTTG CTCAGTCTAC CGTGGAAAAA TCCTTCAAGG ATGCGGGCCT GGTGGTTGAA  
 ATTGCACCGT TCGGCGGTGA ATGTAGCCAC AACGAAATTG ACCGTCTGCG TGGCATCGCT  
 GAAACTGCCC AATGTGGCGC GATTCTGGGC ATCGGTGGCG GCAAGACCCT GGACACTGCC  
 AAAGCGCTGG CGCATTTCAT GGGTGTCCCA GTTGCATCG CTCCGACCAT CGCGTCTACC  
 GCTGCGCCGT GCTCTGCCCT GTCCGTGATC TACACGGACG AAGGCGAGTT CGACCGCTAC  
 CTGCTGCTGC CAAACAACCC GAATATGGTG ATTGTGGACA CCAAATCGT TGCAGGTGCG  
 CCGGCGCGTC TGCTGGCGGC TGGCATTGGT GACGCACTGG CGACCTGGTT CGAAGCACGC  
 GCGTGCTCCC GTTCTGGTGC GACGACCATG GCTGGCTGCA AATGCACCCA GGCAGCGCTG  
 GCGCTGGCGG AACTGTGCTA TAACACCCTG CTGGAGGAAG GCGAAAAAGC AATGCTGGCG  
 GCGGAACAGC ACGTCGTAAC CCCTGCTCTG GAACGTGTAA TTGAAGCAAA TACTTACCTG  
 AGCGGCGTGG GTTTCGAATC CGGTGGCCTG GCGGCTGCGC ACGCTGTTCA TAACGGCCTG  
 ACCGCGATCC CTGACGCGCA CCACTACTAT CACGGCGAGA AAGTGGCTTT CGGCACCCTG  
 ACTCAACTGG TACTGAAAAA CGCGCCGGTC CAGGAAATCG AAACCGTGGC GGCCTGTCC  
 CATGCAGTAG GCCTGCCGAT CACCCTGACC CAGCTGGACA TCAAAGAAGA CGTGCCAGCA  
 AAAATGCGTA TCGTGGCCGA AGCGGCATGC GCAGAAGGTG AGACCATCCA TAACATGCCG  
 GCGGCGCTA CCCCAGATCA GGTCTACGCC GCCCTGCTGG TAGCAGACCA ATATGGCCAG  
 CGTTTTCTGC AGGAATGGGA ATAA

**sADH14 (Accession No. BAD32689.1)**

ATGATGAAAG CGCTGTGTTA CCTGGGTTCT AAAACTATCA AATGGCAGAC CGTAGCCAAA  
 CCGACCCTGA AATCCCCAAC CGACGTTATC GGTAACCTGT CTGCACTGAC CCTGTGTGGC

TCTGATCTGC ACATTATTGC GGGTCACGTA AAAGAAAGCA CCGATATCGC CGAGTCCCAG  
 CCGGGCCGTG GCCTGATCCT GGGTCACGAA GGTATCATCA AAGTGGAAGA GGTAGGCGAT  
 GCTGTCAAAA ACTTCAAACG TGGTGACGTT TGCATCGTCT CTTGCATCAC CAGCTGCGGT  
 GAATGCTACT ACTGCAAACG TGATCTGCAG TCCCATTGCA ACCGTACCGA AGGTACCTCC  
 GGCTGGATCC TGGGCCACGA AATTGATGGT ACCCAGGCCG AATACGTCCG TATCCCGTAC  
 GCCGACCAGT CTCTGTACAA AGCTCCGGAG AACGTGCCGA TCGAGAGCCT GCTGATGCTG  
 AGCGACATCC TGCCGACCGC GTACGAAGTG GGCGTTGTCT CTGGCAATGT GAAAAAAGGT  
 GATACCGTCG CCATCGTAGG TCTGGGCCCT GTTGGCCTGT CCGCGCTGCT GTCCGCTAAA  
 GCCCTGGACC CGGCTAAAAT CATTGCAATT GATATGGACG ACTCTCGTCT GGAGGTTGCA  
 CGTGCCTCTGG GTGCGCACGA AACTATCAAT CCGGGCAAAC AGGATGCTGC AAAGTGTGTT  
 CATGAACGTA CCGCGACGGA AGGTAAGTCT TCTGGTGTAG ACGTTGCAAT CGAATGTGTT  
 GGCGTGCCGG CCACCTTTGA AATGTGCGAA GACCTGCTGT GTCCGGGTGG CCACCTGTCT  
 AACGTTGGCG TTCACGGTTC TAGCGTCGAA CTGAAACTGC AGGAGCTGTG GATCAAAAAC  
 ATTTCTATCA GCACCGGTCT GGTATCTGCT TATTCCACCG AAACCCTGCT GCAGAAAGTT  
 ATCGACAAAA AACTGGACCC GACCCCTCTG GCAACCCACC ATTTCAAGCT GAGCGAAATC  
 GAAAAGGCGT ACGATGTCTT CTCTCACGCC GCAGATAACC AGGCCATCAA AATGGTGATC  
 ACCTGTGACG AA

**sADH15 (Accession No. BAA24528.1)**

ATGAGCATTG CGTCCAGCCA GTACGGCTTC GTGTTCAACA AACAGTCCGG CCTGAACCTG  
 CGCAACGATC TGCCTGTTCA TAAACCGAAG GCGGGTCAGC TGCTGCTGAA AGTTGATGCT  
 GTTGGTCTGT GCCATTCCGA TCTGCACGTA ATTTATGAGG GCCTGGATTG CGGCGATAAC  
 TACGTGATGG GCCACGAAAT TGCAGGTACC GTGGCTGCGG TAGGCGACGA CGTTATCAAC  
 TACAAAGTAG GCGACCGTGT TGCTTGTGTG GGCCCGAACG GTTGCGGTGG TTGCAAGTAT  
 TGCCGTGGTG CAATCGACAA CGTTTGCAAG AACGCATTTG GTGACTGGTT TGGTCTGGGC  
 TACGATGGTG GTTATCAGCA GTATCTGCTG GTAACCCGTC CGCGTAACCT GAGCCGTATC  
 CCAGATAACG TTTCCGCCGA CGTAGCGGCG GCATCTACCG ACGCGGTACT GACTCCGTAT  
 CATGCTATTA AGATGGCACA GGTGTCTCCT ACCAGCAACA TCCTGCTGAT CCGTGCGGGC  
 GGCCTGGGTG GTAACGCGAT CCAGGTAGCG AAAGCCTTCG GTGCAAAAGT TACTGTACTG  
 GATAAAAAAA AAGAGGCACG CGATCAAGCT AAAAAACTGG GTGCAGATGC GGTCTACGAA  
 ACTCTGCCGG AATCTATCTC TCCTGGTTCC TTCAGCGCTT GCTTCGATTT CGTCTCTGTA  
 CAGGCGACGT TCGATGTTTG CCAGAAATAT GTTGAGCCAA AAGGTGTAAT TATGCCGGTT  
 GGTCTGGGCG CGCCTAACCT GTCTTTTAAAC CTGGGTGATC TGGCGCTGCG CGAAATTCGT  
 ATTCTGGGTT CTTTCTGGGG TACCACTAAC GATCTGGACG ACGTCCTGAA ACTGGTTTCC  
 GAGGGCAAAG TGAAACCGGT TGTTTCGCAGC GCAAAACTGA AAGAGCTGCC GGAGTATATC  
 GAAAAACTGC GTAACAACGC GTATGAGGGT CGTGTTGTCT TTAACCCG

**sADH16 (Accession No. BAN45671.1)**

ATGCTGCGCA CTAATCTGCG CACGTTGCTGCT CGTCCGCAGT TTATTGCGCG CCTGGCGACT  
 GCGCCGGTAA TCCCGAAAAAC CCAAAAAGGC GTTATTTTCT ACGAAAACGG TGGTGAAGT  
 CAGTACAAGG ACATCCCAGT ACCGGAGCCA AAACCGAACG AAATCCTGGT TAATGTTAAG  
 TACAGCGGTG TTTGTACAC CGATCTGCAC GCCTGGAAGG GTGACTGGCC ACTGCCAGTG  
 AAAGTCCCGC TGGTGGGTGG TCACGAGGGC GCCGGCATCG TGGTAGCTAA GGGCAGCGAA  
 GTAAAAAACT TTGAGATCGG TGATTATGCG GGCATCAAAAT GGCTGAACGG CAGCTGTATG  
 AGCTGTGAGC TGTGCGAAAA AGGTTACGAA TCCAACCTGCC TGCAGGCCGA TCTGAGCGGC  
 TATACCCATG ACGGTAGCTT TCAGCAATAC GCTACCGCGG ATGCGGTTCA GCGGCTCAG  
 ATCCCGAAGA ACGTAGACCT GGCTGAGATC AGCCCTATCC TGTGCGCTGG GTGACTGTT  
 TATAAGGCGC TGAAAACCGC GGATCTGGCT CCGGGCCAGT GGGTCGCTAT CTCTGGCGCG  
 GCTGGTGGTC TGGGTTCTCT GCGGGTGCAA TACGCTAAAG CTATGGGTCT GCGTGTCTG  
 GGCATCGACG GTGGTGCAGA AAAAGAAAAAG CTGTTTTAAAA GCCTGGGTGG CGAGATCTTC  
 ATCGATTTCA CCAAAGAAAA AAACATCGTA GAAGCCATTC AGGAGGCAAC TAATGGCGGC  
 CCGCATGGCG TCATCAACGT ATCCGTTGCG GAAGCAGCGA TCTCTCAGTC CACCGAGTAT  
 GTTCGTCCGA CCGGTACCGT AGTACTGGTG GGTCTGCCAG CAGGTGCTGT CTGCAAAAAGC  
 GAAGTGTCT CTCACGTGGT AAAATCTATC TCTATCAAAG GCAGCTACGT GGGTAATCGT  
 GCGGACACCC GTGAGGCGAT CGACTTCTTC GAACGTGGTC TGGTGCCTAG CCCGATCAAG  
 ATCGTGGGTC TGAGCGAACT GCCGGAAGTG TACAAACTGA TGGAGCAGGG CAAAATCCTG

GGCCGTTACG TCGTGGATAC TACCAA

**sADH17 (Accession No. CAD36475.1)**

ATGAAAGCGC TGCAATACAC CGAAATCGGT AGCGAACCGG TGGTCGTTGA TGTCCCGACC  
CCTGCGCCGG GTCCGGGTGA AATTCTGCTG AAAGTAACCG CTGCGGGTCT GTGTACACAGC  
GACATCTTCG TTATGGACAT GCCGGCTGAA CAGTATATCT ACGGCCTGCC GCTGACCCTG  
GGCCATGAAG GCGTGGGCAC CGTTGCGGAA CTGGGTGCGG GCGTGACCGG TTTTCGAAACT  
GGCGACGCTG TTGCAGTTTA CGGCCCTTGG GGCTGTGGCG CTTGCCACGC ATGCGCACGT  
GGCCGTGAGA ACTACTGCAC CCGTGC GGCA GAGCTGGGCA TCACTCCTCC GGGCCTGGGC  
TCTCCGGGTA GCATGGCTGA GTACATGATC GTTACTCCG CTCGTACCT GGTCCCGATC  
GGTGACCTGG ACCCGGTGGC AGCAGTGCCG CTGACCGATG CTGGCCTGAC CCCGTACCAC  
GCCATCAGCC GTGTACTGCC GCTGCTGGGC CCAGGTTCTA CGGCTGTTGT AATTGGCGTC  
GGTGGTCTGG GTCACGTTGG CATTAGATT CTGCGCGCCG TTAGCGCCGC GCGTGTATC  
GCGGTTGATC TGGACGACGA CCGCCTGGCG CTGGCGCGTG AAGTTGGTGC AGATGCGGCT  
GTTAAATCTG GTGCGGGTGC GCGGATGCT ATTCGTGAAC TGAAGTGGTGC CGAAGGTGCT  
ACTGCTGTTT TCGATTTTGT GGGTGCAG TCTACCATCG ACACCGCACA GCAAGTCGTG  
GCAATCGATG GCCACATCAG CGTTGTCGGC ATCCACGCCG GTGCACACGC CAAAGTTGGT  
TTCTTCATGA TCCCATTCCG TGCTAGCGTT GTTACCCCGT ATTGGGGTAC TCGCTCCGAG  
CTGATGGACG TTGTTGATCT GGCTCGTGCA GGCCGCGCTG ATATTACATC CGAAACCTTC  
ACCCTGGACG AAGGCCCTAC TGCATACCGC CGTCTGCGCG AGGGCTCTAT CCGTGGCCGT  
GGCGTGGTTG TACCGGGTTA A

**F. DNA probes for rRNA depletion.**

| Name   | Sequence                                                                             |
|--------|--------------------------------------------------------------------------------------|
| 23S-3  | CACTTATCTCTCCGCATTTAGCTACCGGGCAGTGCCATTGGCATGACAACCCGAACACCAGTGATGCGTCCACT<br>CCGGT  |
| 23S-4  | CCTCTCGTACTAGGAGCAGCCCCCTCAGTTCTCCAGCGCCACGGCAGATAGGGACCGAACTGTCTCACGACG<br>TTCTAA   |
| 23S-5  | ACCCAGCTCGCGTACCACCTTAAATGGCGAACAGCCATACCCCTGGACCTACTTCAGCCCCAGGATGTGATGAG<br>CCGAC  |
| 23S-6  | ATCGAGGTGCCAAACACCGCCGTGCATATGAACTTTGGGCGGTATCAGCCTGTTATCCCCGGAGTACCTTTTAT<br>CCGTT  |
| 23S-7  | GAGCGATGGCCCTTCATTGCAACCACCGGATCACTATGACCTGCTTTCGCACCTGCTCGCGCCGTACGCTC<br>GCAGTC    |
| 23S-8  | AAGCTGGCTTATGCCATTGCACTAACCTCCTGATGTCCGACCAGGATTAGCCAACCTTCGTGCTCCTCCGTTACTC<br>TTTA |
| 23S-9  | GGAGGAGACCGCCCCAGTCAAACCTACCCACAGACACTGTCCGCAACCCGGATTACGGGTCAACGTTAGAACAT<br>CAAACA |
| 23S-10 | TTAAAGGGTGGTATTTCAAGGTCGGCTCCATGCAGACTGGCGTCCACACTTCAAAGCCTCCCACCTATCCTACAC<br>ATCAA |
| 23S-11 | GGCTCAATGTTCAAGTGTCAAGCTATAGTAAAGGTTACGGGGTCTTTCCGTCTTGCCGCGGGTACACTGCATCTT<br>CACAG |
| 23S-12 | CGAGTTCAATTTCACTGAGTCTCGGGTGGAGACAGCCTGGCCATCATTACGCCATTCTGCAGGTGCGAACTTAC<br>CCGAC  |
| 23S-13 | AAGGAATTTGCTACCTTAGGACCGTTATAGTTACGGCCGCCGTTACCGGGGCTTCGATCAAGAGCTTCGCTTG<br>CGCTA   |
| 23S-14 | ACCCATCAATTAACCTTCCGGCACCGGGCAGGCGTCACACCGTATACGTCCACTTTCGTGTTGCACAGTGCTG<br>TGTTT   |
| 23S-15 | TTAATAAACAGTTGCAGCCAGCTGGTATCTTCGACTGATTTAGCTCCACGAGCAAGTCGCTTCACCTACATATCA<br>GCGT  |
| 23S-16 | GCCTTCTCCGAAGTTACGGCACCATTTTGCCTAGTTCTTACCCGAGTTCTCTCAAGCGCCTTGGTATTCTCTA<br>CCTG    |
| 23S-17 | ACCACCTGTGTCGGTTTGGGGTACGATTTGATGTTACCTGATGCTTAGAGGCTTTTCTGGAAGCAGGGCATTGT<br>TGCT   |
| 23S-18 | TCAGCACCGTAGTGCCTCGTCATCACGCCTCAGCCTTGATTTTCCGGATTGCTGAAAATCAGCCTACACGCTT<br>AAAC    |
| 23S-19 | CGGGACAACCGTCGCCCCGGCCAACATAGCCTTCTCCGTCCCCCTTCGCAGTAACCAAGTACAGGAATATTA<br>CCTGT    |
| 23S-20 | TTCCATCGACTACGCCTTTCGGCCTCGCCTTAGGGGTCGACTCACCTGCCCGATTAACTGGACAGGAACC               |

|        |                                                                                         |
|--------|-----------------------------------------------------------------------------------------|
|        | CTTGG                                                                                   |
| 23S-21 | TCTTCCGGCGAGCGGGCTTTTCACCCGCTTTATCGTTACTTATGTCAGCATTTCGCACTTCTGATACCTCCAGCATA<br>CCTC   |
| 23S-22 | ACAGTACACCTTACAGGCTTACAGAACGCTCCCCTACCCAACAACGCATAAGCGTCGCTGCCGAGCTTCGGTG<br>CATGG      |
| 23S-23 | TTTAGCCCCGTTACATCTTCCGCGCAGGCCGACTCGACCAGTGAGCTATTACGCTTTCTTTAAATGATGGCTGCTT<br>CTAA    |
| 23S-24 | GCCAACATCCTGGCTGTCTGGGCCTTCCCACATCGTTTCCACTTAACCATGACTTTGGGACCTTAGCTGGCGGT<br>CTGGG     |
| 23S-25 | TTGTTTCCCTTTCACGACGGACGTTAGCACCCGCGGTGTGTCTCCCGTGATAACATTCTCCGGTATTTCGAGTTT<br>GCAT     |
| 23S-26 | CGGGTTGGTAAGTCGGGATGACCCCTTGCCGAAACAGTGCTCTACCCCGGAGATGAGTTCACGAGGCGCTAC<br>CTAAAT      |
| 23S-27 | AGCTTTCGGGGAGAACCAGCTATCTCCCGTTTTGATTGGCCTTTCACCCCGAGCCACAAGTCATCCGCTAATTTTT<br>CAAC    |
| 23S-28 | ATTAGTCGGTTCGGTCCCTCCAGTTAGTGTACCCAACCTTCAACCTGCCATGGCTAGATCACCGGGTTTCGGGT<br>CTATA     |
| 23S-29 | CCCTGCAACTTAACGCCAGTTAAGACTCGTTTTCCCTTCGGCTCCCCTATTTCGGTTAACCTTGCTACAGAATATA<br>AGTC    |
| 23S-30 | GCTGACCCATTATACAAAAGGTACGCAGTCACACGCCTAAGCATGCTCCCCTGCTTGTACGTACACGGTTTCAG<br>GTTCT     |
| 23S-31 | TTTTCACTCCCCTCGCCGGGGTTCTTTTCGCCTTTCCTCACGGTACTGGTTCACTATCGGTCAGTCAGGAGTATT<br>TAGC     |
| 23S-32 | CTTGGAGGATGGTCCCCCATATTCAGACAGGATACCACGTGTCCCGCCCTACTCATCGAGCTCACAGCATGTGC<br>ATTTT     |
| 23S-33 | TGTGTACGGGGCTGTACCCTGTATCGCGCGCCTTTCAGACGCTTCCACTAACACACACACTGATTCAGGCTCT<br>GGGCT      |
| 23S-34 | CCTCCCCGTTTCGCTCGCCGCTACTGGGGGAATCTCGGTTGATTTCTTTTCTCGGGGTACTIONTAGATGTTTCAGTTC<br>CCCC |
| 23S-35 | GGTTCGCCTCATTAACTATGGATTAGTTAATGATAGTGTGTGCGAAACACACTGGGTTTCCCCATTTCGAAATCG<br>CCGG     |
| 23S-36 | TTATAACGGTTCATATCACCTTACCGACGCTTATCGCAGATTAGCACGTCTTCATCGCCTCTGACTGCCAGGGCA<br>TCCA     |
| 23S-37 | CCGTGTACGCTTAGTCGCTTAA                                                                  |
| 16S-1  | TAAGGAGGTGATCCAACCGCAGTTCCCCTACGGTTACCTTGTACGACTTCACCCAGTCATGAATCACAAAGT<br>GGTAA       |
| 16S-2  | GCGCCCTCCCGAAGGTTAAGCTACCTACTTCTTTGCAACCCACTCCCATGGTGTGACGGGCGGTGTGTACAAGG<br>CCCCG     |
| 16S-3  | GAACGTATTCACCGTGGCATTCTGATCCACGATTACTAGCGATTCCGACTTCATGGAGTCGAGTTGCAGACTCCAA<br>TCCG    |
| 16S-4  | GACTACGACGCACTTTATGAGGTCCGCTTGCTCTCGCGAGGTGCTTCTCTTTGTATGCGCCATTGTAGCACGTG<br>TGTA      |
| 16S-5  | CCCTGGTCGTAAGGGCCATGATGACTTGACGTCATCCCACCTTCTCCAGTTTATCACTGGCAGTCTCCTTTGA<br>GTTCC      |
| 16S-6  | CGGCCGGACCGCTGGCAACAAAAGATAAGGGTTGCGCTCGTTGCGGGACTTAACCCAACATTTACAAACACGAG<br>CTGACG    |
| 16S-7  | ACAGCCATGCAGCACCTGTCTCACAGTTCCCGAAGGCACCAATCCATCTCTGGAAAGTTCTGTGGATGTCAAGAC<br>CAGGT    |
| 16S-8  | AAGGTTCTTCGCGTTGCATCGAATTAACCACATGCTCCACCGCTTGTGCGGGCCCCCGTCAATTCATTTGAGTTT<br>TAAC     |
| 16S-9  | CTTGCGGCCGTACTIONCCCCAGGCGGTGACTTAACGCGTTAGCTCCGGTAGCCACGCCTCAAGGGCACAACCTCC<br>AAGTCG  |
| 16S-10 | ACATCGTTTACGGCGTGGACTACCAGGGTATCTAATCCTGTTTGTCTCCCACGCTTTCGCACCTGAGCGTCAGTC<br>TTCGT    |
| 16S-11 | CCAGGGGGCCGCTTCGCCACCGGTATTCTCCAGATCTCTACGCATTTACCGCTACACCTGGAATTCTACCCC<br>CCTCT       |
| 16S-12 | ACGAGACTCAAGCTTGCCAGTATCAGATGCAGTTCCCAGGTTGAGCCCGGGGATTTACATCTGACTTAAACAAAC<br>CGCCT    |
| 16S-13 | GCGTGCCTTTACGCCAGTAATTCCGATTAACGCTTGCACCCTCCGTATTACCGCGGCTGCTGGCACGGAGTTA<br>GCCGG      |
| 16S-14 | TGCTTCTTCTGCGGGTAACGTCAATGAGCAAAGGTTAACTTTACTCCCTTCTCCCCGCTGAAAGTACTTTTACA<br>ACCC      |
| 16S-15 | GAAGGCTTCTTATACACGCGGCATGGCTGCATCAGGCTTGCGCCATTGTGCAATATTTCCCACTGCTGCCTC<br>CCGTA       |
| 16S-16 | GGAGTCTGGACCGTGTCTCAGTTCCAGTGTGGCTGGTCTCCTCTCAGACCAGCTAGGGATCGTCGCCTAGGTG<br>AGCCGT     |
| 16S-17 | TACCCACCTACTAGCTAATCCCATCTGGGCACATCCGATGGCAAGAGGCCCGAAGGTCCCCCTTTTGGTCTTG<br>CGACG      |

|        |                                                                                       |
|--------|---------------------------------------------------------------------------------------|
| 16S-18 | TTATGCGGTATTAGCTACCGTTTCCAGTAGTTATCCCCCTCCATCAGGCAGTTTCCCAGACATTACTCACCCGTCC<br>GCCA  |
| 16S-19 | CTCGTCAGCAAAGAAGCAAGCTTCTTCCTGTTACCGTTCGACTTGCATGTGTTAGGCCTGCCGCCAGCGTTCAAT<br>CTGAG  |
| 16S-20 | CCATGATCAAACCTTTCAATTTAAA                                                             |
| 5S-1   | ATGCCTGGCAGTTCCTACTCTCGCATGGGGAGACCCACACTACCATCGGGCGCTACGGCGTTTCACTTCTGAGT<br>TCGGC   |
| 5S-2   | ATGGGGTCAGGTGGGACCACCGCGCTACGGCCGCCAGGCA                                              |
| 23S-1  | AAGGTAAAGCCTCACGGTTCATTAGTACCGGTTAGCTCAACGCATCGCTGCGCTTACACACCCGGCCTATCAACG<br>TCGTC  |
| 23S-2  | GTCTTCAACGTTCCCTTCAGGACTCTCAAGGAGTCAGGGAGAACTCATCTCGGGGCAAGTTTCGTGCTTAGATGCT<br>TTCAG |

## G. Open reading frame for *pncB* and *rpoC*

### *pncB*

```
1 GTGCTAAGCC GCGAGGAAAG CGAGGCTGAA CAGGCAGTCG CCCGTCCACA GGTGACGGTG
61 ATCCCGCGTG AGCAGCATGC TATTTCCC GC AAAGATATCA GTGAAAATGC CCTGAAGGTA
121 ATGTACAGGC TCAATAAAGC GGGATACGAA GCCTGGCTGG TTGGCGGCGG CGTGCGCGAC
181 CTGTTACTTG GCAAAAAGCC GAAAGATTTT GACGTAACCA CTAACGCCAC GCCTGAGCAG
241 GTGCGCAAAC TGTTCGGTAA CTGCCGCTG GTGGGTCGCC GTTTCCGTCT GGCTCATGTA
301 ATGTTTGCC CGGAGATTAT CGAAGTTGCG ACCTTCCGTG GACACCACGA AGGTAACGTC
361 AGCGACCGCA CGACCTCCCA ACGCGGGCAA AACGGCATGT TGCTGCGCGA CAACATTTTC
421 GGCTCCATCG AAGAAGACGC CCAGCGCCGC GATTTCACTA TCAACAGCCT GTATTACAGC
481 GTAGCGGATT TTACCGTCCG TGATTACGTT GCGGCATGA AGGATCTGAA GGACGGCGTT
541 ATCCGTCTGA TTGGTAACCC GGAAACGCGC TACCGTGAAG ATCCGGTACG TATGCTGCGC
601 GCGGTACGTT TTGCCGCCAA ATTGGGTATG CGCATCAGCC CGGAAACCGC AGAACCGATC
661 CCTCGCCTCG CTACCTGCT GAACGATATC CCACCGCAC GCCTGTTTGA AGAATCGCTT
721 AAATGCTAC AAGCGGGCTA CGGTTACGAA ACCTATAAGC TGTTGTGTGA ATATCATCTG
781 TTCCAGCCGC TGTTCGGAC CATTACCCGC TACTTCACGG AAAATGGCGA CAGCCCAGATG
841 GAGCGGATCA TTGAACAGGT GCTGAAGAAT ACCGATACGC GTATCCATAA CGATATGCGC
901 GTGAACCCGG CGTTCCTGTT TGCCGCCATG TTCTGGTACC CACTGCTGGA GACGGCACAG
961 AAGATCGCC AGGAAAGCGG CCTGACCTAT CACGACGCTT TCGCGCTGGC GATGAACGAC
1021 GTGCTGGAC AAGCCTGCC TTTACTGGCA ATCCCGAAAC GTCTGACGAC ATTAACCCGC
1081 GATATCTGGC AGTTGCAGTT GCGTATGTCC CGTCGTCAGG GTAAACGCGC ATGGAAACTG
1141 CTGGAGCATC CTAAGTTCCG TGCGGCTTAT GACCTGTTGG CCTTGCGAGC TGAAGTTGAG
1201 CGTAACGCTG AACTGCAGCG TCTGGTGAAG TGGTGGGGTG AGTTCAGGT TTCGCGGCCA
1261 CCAGACCAA AAGGGATGCT CAACGAGCTG GATGAAGAAC CGTCACCGC TCGTCGTACT
1321 CGTCGTCCAC GCAAACGCGC ACCACGTCGT GAGGGTACCG CATGA
```

### *rpoC*

```
1 gtgAAAGATT TATTAAGTT TCTGAAAGCG CAGACTAAAA CCGAAGAGTT TGATGCGATC
61 AAAATTGCTC TGGCTTCGCC AGACATGATC CGTTCATGGT CTTTCGGTGA AGTTAAAAAG
121 CCGGAAACCA TCAACTACCG TACGTTCAAA CCAGAACGTG ACGGCCTTTT CTGCGCCCGT
181 ATCTTTGGGC CGGTAAAAGA TTACGAGTGC CTGTGCGGTA AGTACAAGCG CCTGAAACAC
241 CGTGGCGTCA TCTGTGAGAA GTGCGGCGTT GAAGTGACCC AACTAAAGT ACGCCGTGAG
301 CGTATGGGCC ACATCGAACT GGCTTCCCCG ACTGCGCACA TCTGGTTCCT GAAATCGCTG
361 CCGTCCCGTA TCGGTCTGCT GCTCGATATG CCGCTGCGCG ATATCGAACG CGTACTGTAC
421 TTTGAATTCT ATGTGGTTAT CGAAGGCGGT ATGACCAACC TGAACGTC A GCAGATCCTG
481 ACTGAAGAG AGTATCTGGA CGCGCTGGAA GAGTTCGGTG ACGAATTCGA CGCGAAGATG
541 GGGGCGGAAG CAATCCAGGC TCTGCTGAAG AGCATGGATC TGGAGCAAGA GTGCGAACAG
601 CTGCGTGAAG AGCTGAACGA AACCAACTCC GAAACCAAGC GTAAAAAGCT GACCAAGCGT
661 ATCAAACGTC TGAAGCGT CGTTCAGTCT GGTAAACAAAC CAGAGTGGAT GATCCTGACC
721 GTTCTGCCCG TACTGCCGCC AGATCTGCGT CCGCTGGTTC CGCTGGATGG TGGTCGTTTC
781 CCGACTTCTG ACCTGAACGA TCTGTATCGT CCGCTCATTA ACCGTAACAA CCGTCTGAAA
841 CGTCTGCTGG ATCTGGCTGC GCCGGACATC ATCGTACGTA ACGAAAAACG TATGCTGCAG
901 GAAGCGGTAG ACGCCCTGCT GGATAACGGT CGTCGCGGTC GTGCGATCAC CGGTTCTAAC
961 AAGCGTCTC TGAAATCTTT GGCCGACATG ATCAAAGGTA AACAGGGTCC TTTCCGTGAG
1021 AACCTGCTCG GTAAGCGTGT TACTACTCC GGTGCTTCTG TAATCACCGT AGGTCCATAC
1081 CTGCGTCTGC ATCAGTGCAG TCTGCCGAAG AAAATGGCAC TGGAGCTGTT CAAACCGTTC
1141 ATCTACGGCA AGCTGGAAT GCGTGGTCTT GCTACCACCA TTAAGCTGC GAAGAAAATG
1201 GTTGAGCGC AAGAAGCTGT CGTTTGGGAT ATCTGGACG AAGTTATCCG CGAACACCCG
1261 TACTGCTGA ACCGTGCACC GACTCTGCAC CGTCTGGGTA TCCAGGCATT TGAACCGGTA
1321 CTGATCGAAG GTAAAGCTAT CCAGCTGCAC CCGCTGGTTT GTGCGGCATA TAACCCGAC
1381 TTCGATGGTG ACCAGATGGC TGTTACGTA CCGCTGACGC TGAAGCCCA GCTGGAAGCG
1441 CGTGCCTGTA TGATGTCTAC CAACAACATC CTGTCCCGG CGAACGGCGA ACCAATCATC
1501 GTTCCGTCTC AGGACGTTGT ACTGGGTCTG TACTACATGA CCCGTGACTG TGTTAACCGC
```



1561 AAAGGCGAAG GCATGGTGCT GACTGGCCCG AAAGAAGCAG AACGTCTGTA TCGCTCTGGT  
1621 CTGGCTTCTC TGCATGCGCG CGTTAAAGTG CGTATCACCG AGTATGAAAA AGATGCTAAC  
1681 GGTGAATTAG TAGCGAAAA CAGCCTGAAA GACACGACTG TTGGCCGTGC CATTCTGTGG  
1741 ATGATTGTAC CGAAAGGTCT GCCTTACTCC ATCGTCAACC AGGCGCTGGG TAAAAAAGCA  
1801 ATCTCCAAAA TGCTGAACAC CTGCTACCGC ATTCTCGGTC TGAAACCGAC CGTTATTTTT  
1861 GCGGACCAGA TCATGTACAC CGGCTTCGCC TATGCAGCGC GTTCTGGTGC ATCTGTGGT  
1921 ATCGATGACA TGGTCATCCC GGAGAAGAAA CACGAAATCA TCTCCGAGGC AGAAGCAGAA  
1981 GTTGCTGAAA TTCAGGAGCA GTTCCAGTCT GGTCTGGTAA CTGCGGGCGA ACGCTACAAC  
2041 AAAGTTATCG ATATCTGGGC TCGGCGAAG GATCGTGTAT CCAAAGCGAT GATGGATAAC  
2101 CTGCAAACTG AAACCGTGAT TAACCGTGAC GGTCAAGGAA AGAAGCAGGT TTCCTTCAAC  
2161 AGCATGTACA TGATGGCCGA CTCGGGTGCG CGTGGTTCTG CGGCACAGAT TCCCAAGCTT  
2221 GCTGGTATGC GTGGTCTGAT GCGGAAGCCG GATGGCTCCA TCATCGAAAC GCCAATCACC  
2281 GCGAACTTCC GTGAAGGTCT GAACGTACTC CAGTACTTCA TCTCCACCCA CGGTGCTCGT  
2341 AAAGTCTGG CGGATACCGC ACTGAAAAC GCGAACTCCG GTTACCTGAC TCGTCTGCTG  
2401 GTTGACGTGG CGCAGGACCT GGTGGTTACC GAAGACGATT GTGGTACCCA TGAAGGTATC  
2461 ATGATGACTC CGGTTATCGA GGGTGGTGAC GTTAAAGAGC CGCTGCGCGA TCGCGTACTG  
2521 GGTCGTGTAA CTGCTGAAGA CGTCTGAAG CCGGGTACTG CTGATATCCT CGTTCGCGCG  
2581 AACACGTGC TGCACGAACA GTGGTGTGAC CTGCTGGAAG AGAACTCTGT CGACGCGGTT  
2641 AAAGTACGTT CTGTTGTATC TTGTGACACC GACTTTGGTG TATGTGCGCA CTGCTACGGT  
2701 CGTGACCTGG CGCGTGCCA CATCATCAAC AAGGGTGAAG CAATCGGTGT TATCGCGGCA  
2761 CAGTCCATCG GTGAACCGGG TACACAGCTG ACCATGCGTA CGTTCACAT CGGTGGTGGC  
2821 GCATCTCGTG CCGCTGCTGA ATCCAGCATC CAAGTGAAAA ACAAGGTAG CATCAAGCTC  
2881 AGCAACGTGA AGTCGGTTGT GAACTCCAGC GGTAAACTGG TTATCACTT CCGTAATACT  
2941 GAACTGAAAC TGATCGACGA ATTCGGTCTG ACTAAAGAAA GCTACAAAGT ACCTTACGGT  
3001 GCGTACTGG CGAAAGGCGA TGGCGAACAG GTTGTGGCG GCGAAACCGT TGCAAACTGG  
3061 GACCCGCACA CCATGCCGGT TATCACCGAA GTAAGCGGTT TTGTACGCTT TACTGACATG  
3121 ATCGACGGCC AGACCATTAC GCGTCAGACC GACGAACTGA CCGGTCTGTC TTCGCTGGTG  
3181 GTTCTGGATT CCGCAGAACG TACCGCAGGT GGTAAAGATC TCGCTCCGGC ACTGAAAATC  
3241 GTTGATGCTC AGGGTAACGA CGTCTGATC CCAGGTACCG ATATGCCAGC GCAGTACTTC  
3301 CTGCCGGGTA AAGCGATTGT TCAGCTGGAA GATGGCGTAC AGATCAGCTC TGGTGACACC  
3361 CTGGCGCGTA TTCCGAGGA ATCCGGCGGT ACCAAGGACA TCACCGGTGG TCTGCCGCGC  
3421 GTTGCGGACC TGTTCGAAGC ACGTCTCCG AAAGAGCCGG CAATCCTGGC TGAAATCAGC  
3481 GGTATCGTTT CCTTCGGTAA AGAAACCAA GGTAAACGTC GTCTGGTTAT CACCCCGGTA  
3541 GACGGTAGCG ATCCGTACGA AGAGATGATT CCGAAATGGC GTCAGCTCAA CGTGTTCGAA  
3601 GGTGAACGTG TAGAACGTGG TGACGTAATT TCCGACGGTC CGGAAGCGCC GCACGACATT  
3661 CTGCGTCTGC GTGGTGTTCA TGCTGTTACT CGTTACATCG TTAACGAAGT ACAGGACGTA  
3721 TACCGTCTGC AGGGCGTTAA GATTAACGAT AAACACATCG AAGTTATCGT TCGTCAAGT  
3781 CTGCGTAAAG CTACCATCGT TAACGCGGGT AGCTCCGACT TCTGGAAGG CGAACAGGTT  
3841 GAATACTCTC GCGTCAAGAT CGCAAACCGC GAACTGGAAG CGAACGGCAA AGTGGGTGCA  
3901 ACTTACTCCC GCGATCTGCT GGGTATCACC AAAGCGTCTC TGGCAACCGA GTCCTTCATC  
3961 TCCGCGGCAT CGTTCAGGA GACCACTCGC GTGCTGACCG AAGCAGCCGT TCGGGGCAAA  
4021 CGCGACGAAC TGCGCGGCCT GAAAGAGAAC GTTATCGTGG GTCGTCTGAT CCCGGCAGGT  
4081 ACCGGTTACG CGTACCACCA GGATCGTATG CGTCGCCGTG CTGCGGGTGA AGCTCCGGCT  
4141 GCACCGCAGG TGAATGCAGA AGACGATCT GCCAGCCTGG CAGAAGTGTG GAACGCAGGT  
4201 CTGGGCGGTT CTGATAACGA Gtaa

**Figure S1. Fermentation pathways of *E. coli* and gene knockouts.** Major fermentation pathways of *E. coli* and the five gene loci deleted in the DH1Δ5 strain ( $\Delta ackA\text{-}pta$   $\Delta adhE$   $\Delta ldhA$   $\Delta poxB$   $\Delta frdBC$ ).

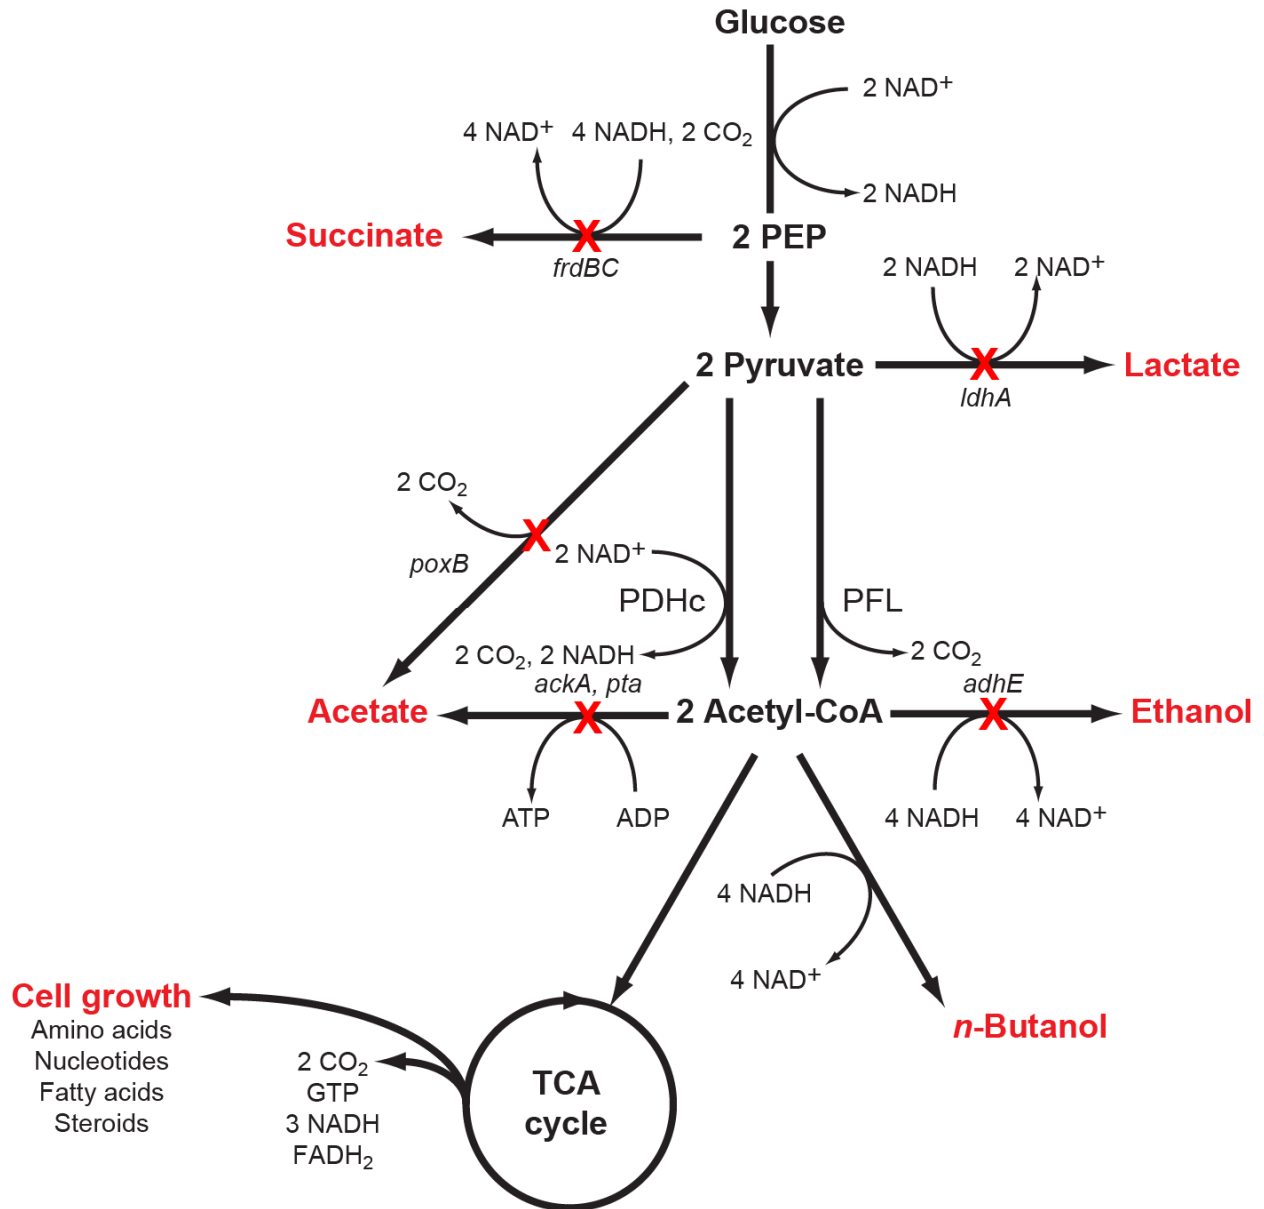

**Figure S2. Dependence of the *n*-butanol:ethanol ratio on oxygen.** When DH1 transformed with the first generation *n*-butanol pathway (pBT33-Bu2 pCWori-ter.adhE2 pBBR1-aceEF.lpd) is cultured under anaerobic conditions, the level of *n*-butanol drops but the level of ethanol remains similar. This result suggests that ethanol produced via AdhE2 can support cell growth under anaerobic conditions. Cultures were grown in TB with 2.5% (w/v) glucose media. Titrers from aerobic cultures were analyzed via GC-FID after 3 d of growth and after 5 d for anaerobic cultures. Data are mean  $\pm$  s.d. of biological replicates (n = 3).

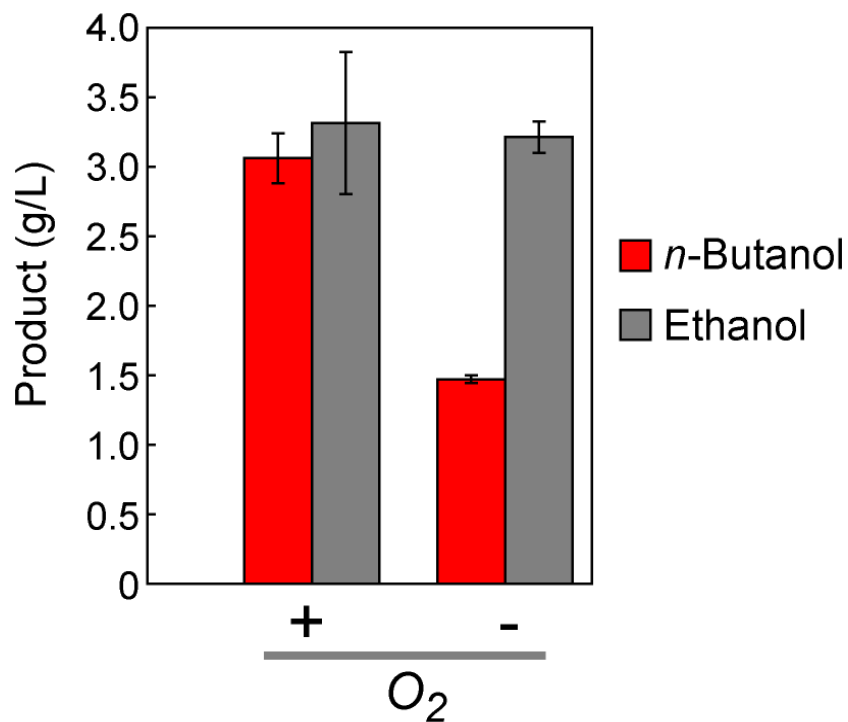

**Figure S3. Biochemical characterization of AdhE2 constructs.** The different domains of the bifunctional AdhE2 from *Clostridium acetobutylicum* were characterized biochemically using 5 different constructs and 3 different assays. (A) AdhE2 constructs consisted of domain-inactivated mutants of either the ALDH or ADH domain. Single domain constructs were also generated by truncation. (\*, inactivated). (B) Representative SDS-PAGE of Strep tag affinity purification of full-length AdhE2s: Pre-induction (lane 1), post-induction (lane 2), soluble lysate (lane 3), insoluble lysate (lane 4), flow-through (lane 5), eluted AdhE2 (lane 6). (C) Wt AdhE2 was characterized by monitoring NADH oxidation in the presence of either an acyl-CoA (ALDH and ADH activity measured) or aldehyde (ADH activity measured). Activity was also measured by CoA release (ALDH activity measured). Domain inactivated and single domain constructs could be characterized directly by the NADH oxidation assay with addition of the appropriate substrate.  $k_{cat}$  and  $K_M$  were obtained by curve-fitting to the Michaelis–Menten parameters. Data are mean  $\pm$  s.e. ( $n = 3$ ) as derived from nonlinear curve fitting to the Michaelis–Menten equation. Error in the relative  $k_{cat}/K_M$  was obtained from propagation.

A

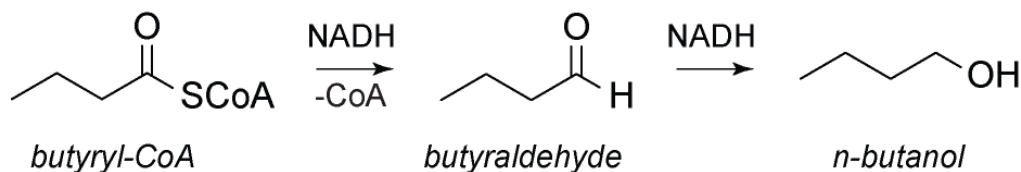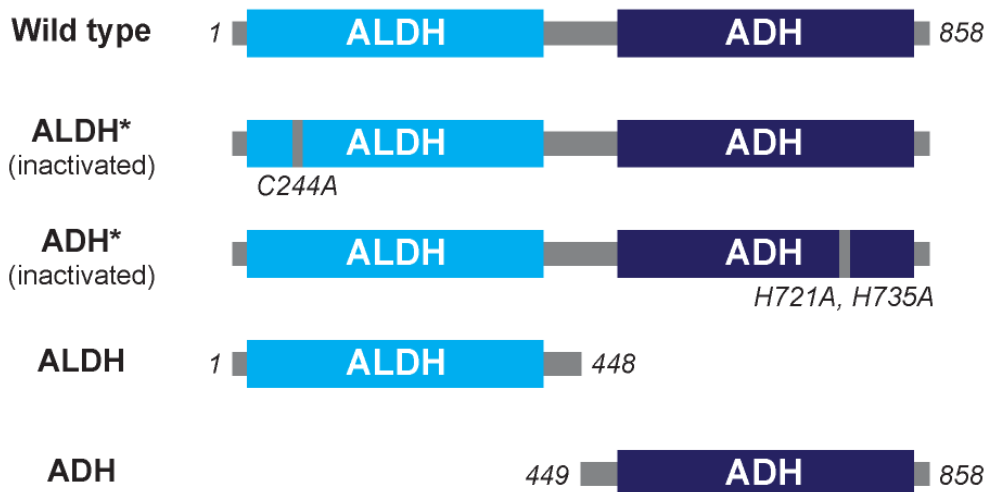

B

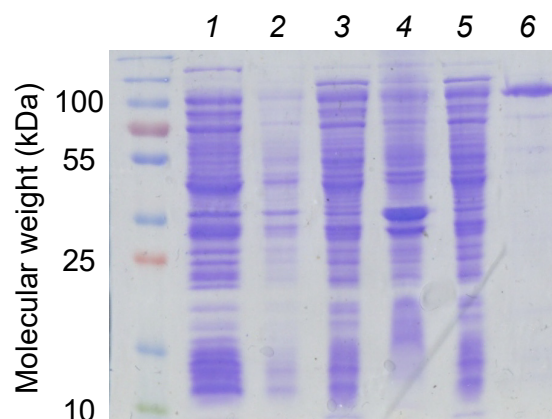

C

| Enzyme                             | Substrate     | $k_{cat}$ (s <sup>-1</sup> ) | $K_M$ (μM) | $k_{cat}/K_M$ (M <sup>-1</sup> s <sup>-1</sup> ) |
|------------------------------------|---------------|------------------------------|------------|--------------------------------------------------|
| <b>WT AdhE2</b>                    |               |                              |            |                                                  |
| NADH oxidation<br>(both domains)   | butyryl-CoA   | 2.2 ± 0.1                    | 23 ± 2     | (9.6 ± 0.3) × 10 <sup>4</sup>                    |
|                                    | acetyl-CoA    | 3.3 ± 0.1                    | 250 ± 15   | (1.3 ± 0.1) × 10 <sup>4</sup>                    |
| CoA release<br>(ALDH domain)       | butyryl-CoA   | 1.2 ± 0.1                    | 10 ± 1     | (1.1 ± 0.1) × 10 <sup>5</sup>                    |
|                                    | acetyl-CoA    | 1.3 ± 0.1                    | 100 ± 10   | (1.3 ± 0.2) × 10 <sup>4</sup>                    |
| Aldehyde substrate<br>(ADH domain) | butyraldehyde | 2.9 ± 0.1                    | 4000 ± 400 | (7.0 ± 0.2) × 10 <sup>2</sup>                    |
|                                    | acetaldehyde  | 5.6 ± 0.1                    | 4500 ± 300 | (1.2 ± 0.1) × 10 <sup>3</sup>                    |
| <b>Domain mutants</b>              |               |                              |            |                                                  |
| ALDH inactive                      | butyraldehyde | 18.7 ± 1.3                   | 2500 ± 500 | (7.5 ± 0.7) × 10 <sup>3</sup>                    |
|                                    | acetaldehyde  | 19.8 ± 1.0                   | 2800 ± 400 | (7.1 ± 0.3) × 10 <sup>3</sup>                    |
| ADH inactive                       | butyryl-CoA   | 0.3 ± 0.1                    | 4 ± 1      | (9.0 ± 1.0) × 10 <sup>4</sup>                    |
|                                    | acetyl-CoA    | 1.3 ± 0.1                    | 70 ± 10    | (1.9 ± 0.4) × 10 <sup>4</sup>                    |
| <b>Domain truncations</b>          |               |                              |            |                                                  |
| ALDH                               | butyryl-CoA   | < 0.1                        | n.d.       | n.d.                                             |
| ADH                                | butyraldehyde | 0.2 ± 0.1                    | 300 ± 50   | (5.8 ± 0.4) × 10 <sup>2</sup>                    |
|                                    | acetaldehyde  | 0.2 ± 0.1                    | 2000 ± 700 | (1.1 ± 0.2) × 10 <sup>2</sup>                    |

**Figure S4. Phylogenetic analysis of ALDH domains.** (A) The biochemical literature was surveyed for ALDH domains characterized to have preference for acyl-CoA substrates larger than acetyl-CoA. Both monofunctional and bifunctional ALDH domains were considered, including the atypical ALDH DmpF that is a fusion with an aldolase domain. In the case of bifunctional ALDHs, only the specificity of the ALDH domain was considered. (B) A phylogenetic tree incorporating biochemically characterized ALDH domains was assembled to identify homologs that may have greater than C<sub>4</sub> substrate specificity. Sequences in purple have higher  $k_{cat}/K_M$  for acyl-CoAs larger than acetyl-CoA, and sequences in green have higher  $k_{cat}/K_M$  for acetyl-CoA. (C) The branching pattern of the biochemically informed tree was applied to all sequences in the ALDH family. Green sequences denote ALDH domains of bifunctional enzymes and red sequences denote monofunctional ALDH domains.

A

| Preference                      | Gene  | Accession No. | Organism                                | Reference                     |
|---------------------------------|-------|---------------|-----------------------------------------|-------------------------------|
| <b>C<sub>4</sub> substrates</b> | AdhE2 | NP_149199     | <i>Clostridium acetobutylicum</i>       | This study                    |
|                                 | ALD   | AAD31841      | <i>Clostridium beijerinckii</i>         | J Toth <i>et al</i> [17]      |
|                                 | ALDH  | YP_001310903  | <i>Clostridium beijerinckii</i>         | RT Yan <i>et al</i> [18]      |
|                                 | PduP  | BAG26139      | <i>Lactobacillus reuteri</i>            | LH Luo <i>et al</i> [19]      |
|                                 | ALDH  | YP_003687877  | <i>Propionibacterium freudenreichii</i> | N Hosio <i>et al</i> [20]     |
| <b>C<sub>2</sub> substrates</b> | AdhE  | NP_415757     | <i>Escherichia coli</i>                 | S Atsumi <i>et al</i> [21]    |
|                                 | AdhE  | AAC47539      | <i>Giardia intestinalis</i>             | LB Sánchez <i>et al</i> [22]  |
|                                 | AdhE  | AAV66076      | <i>Leuconostoc mesenteroides</i>        | OK Koo <i>et al</i> [23]      |
|                                 | DmpF  | CAA43226      | <i>Pseudomonas sp.</i> CF600            | J Powlowski <i>et al</i> [24] |

B

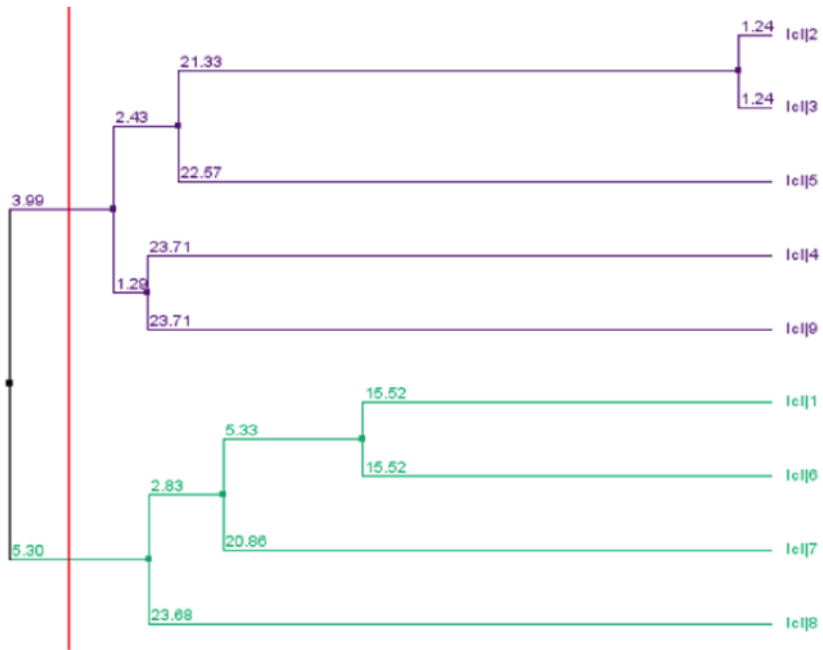

C

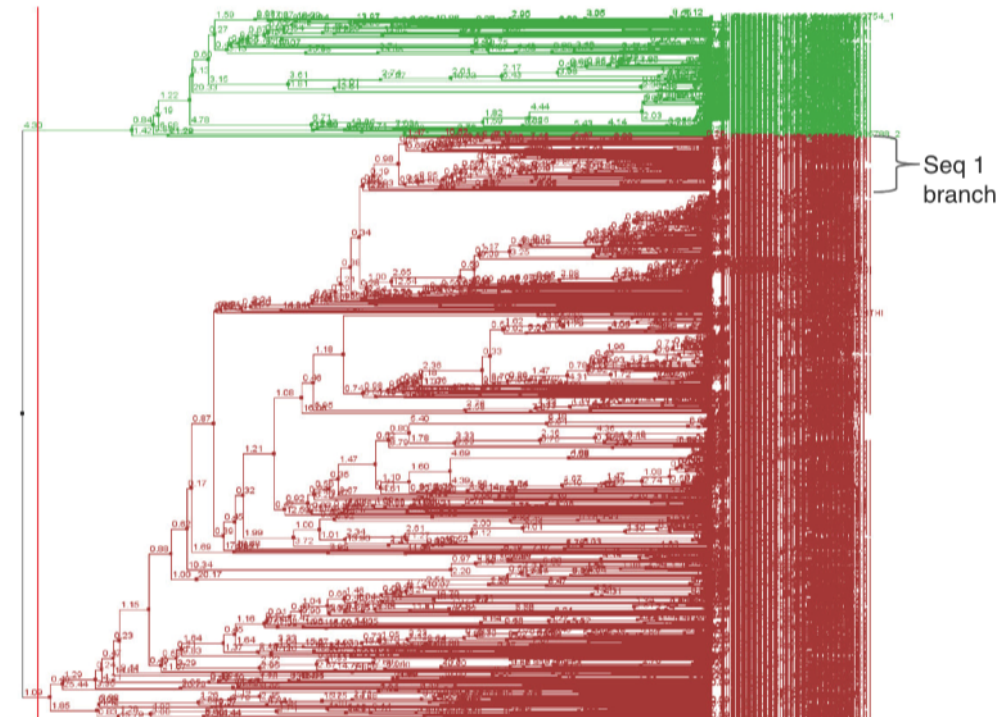

**Figure S5. Screening of AdhE2s.** AdhEs were screened *in vivo* by co-transforming DH1 pBT33-Bu2 [6] and the pCDF3-ter.AdhE2 variants 1–96 or homologs 29–43. All strains were grown anaerobically in TB with 2.5% (w/v) glucose media for 3 d post induction before production titers were analyzed by GC-FID. (A) An initial panel of 96 variants of AdhE2 (AdhE2.1-96) was designed by Calysta to incorporate approximately 40 mutations selected from the natural sequence diversity of AdhE2 homologs. Each variant contained 3–5 mutations and every mutation was present in multiple variants. Around half of the variants produced minimal *n*-butanol, indicating that particular combinations of mutations resulted in non-functional enzymes. The remaining variants produced a wide range of titers in comparison to the wild type sequence. Some variants produced higher *n*-butanol titers, but upon further inspection, exhibited only mild improvements in *n*-butanol:ethanol ratio, suggesting the primary effect was an overall activity increase without shifting substrate specificity. Data are mean  $\pm$  s.d. of biological replicates ( $n = 3$ ). (B) AdhE2 homologs (AdhE29-43) sampled from the putative C<sub>4</sub> branch of the phylogenetic tree. Comparison of *n*-butanol and ethanol titers do not show any increased selectivity compared to WT (AdhE2 from *C. acetobutylicum*). Data are mean  $\pm$  s.d. of biological replicates ( $n = 3$ ).

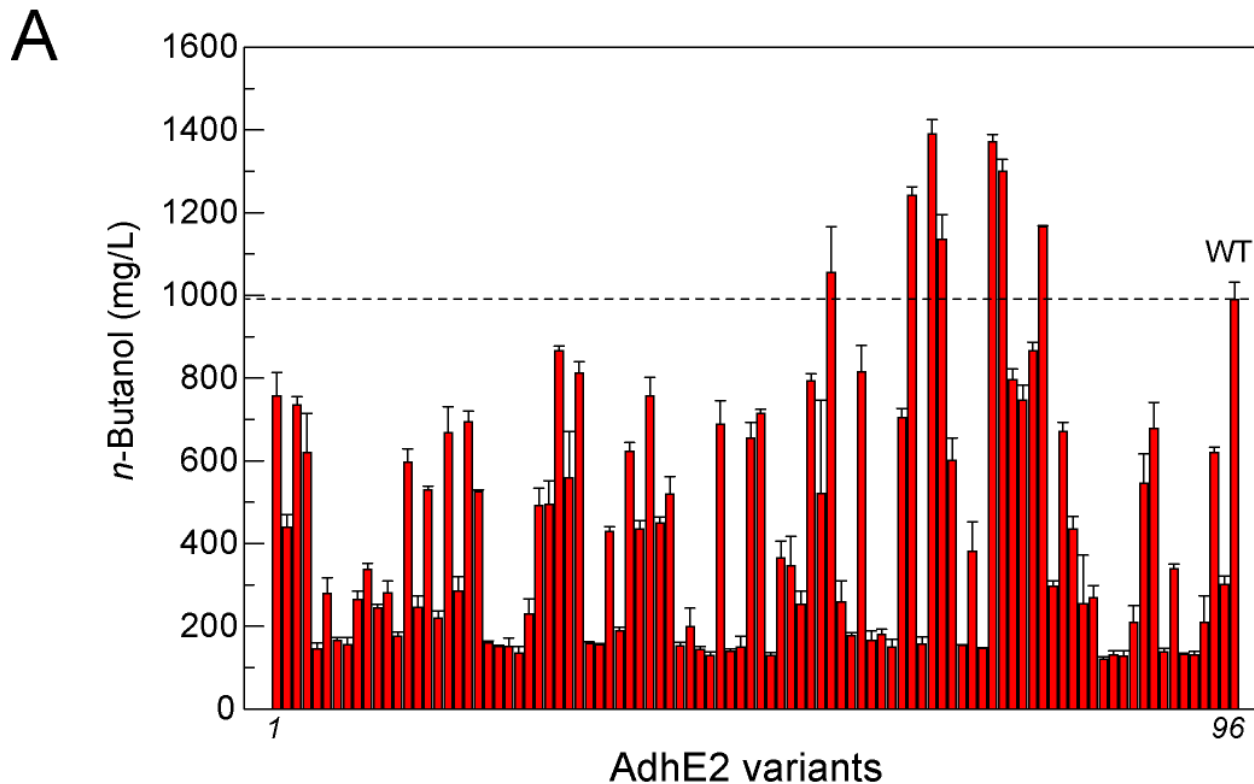



**B**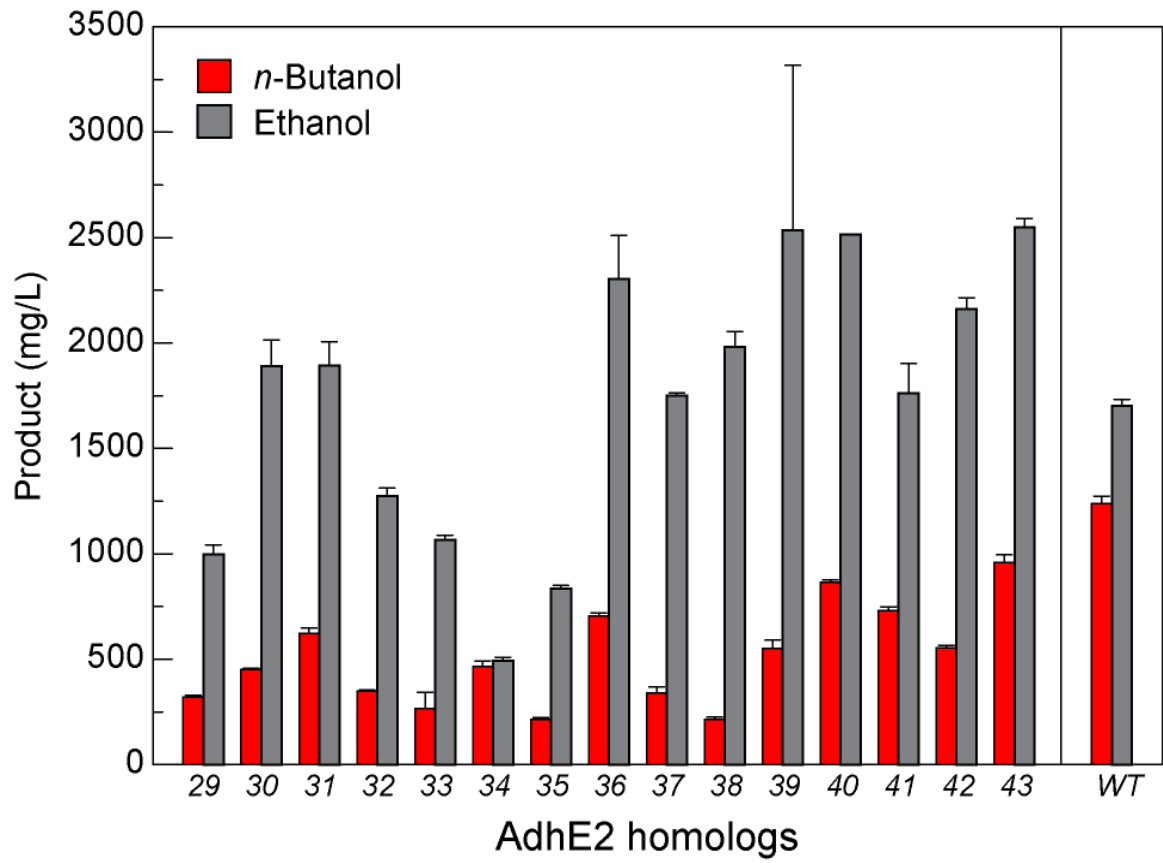

**Figure S6. Screening of monofunctional ALDHs for C<sub>4</sub> selectivity.** Using the existing ALDH phylogenetic tree, the hypothetical C<sub>4</sub>-selective branch was widely sampled for monofunctional ALDHs to incorporate the full diversity of the branch in a small number of sequences. These sequences (ALDH1-15 and 46) were screened *in vivo* by co-transforming DH1Δ5 pBT33-Bu2 and the pCDF3-ter.ALDH plasmid. All strains were grown anaerobically in TB with 2.5% (w/v) glucose media for 3 d post induction before analyzing production titers by GC-FID. 15 of 16 monofunctional ALDHs produced more *n*-butanol than ethanol. Data are mean ± s.d. of biological replicates (n = 3).

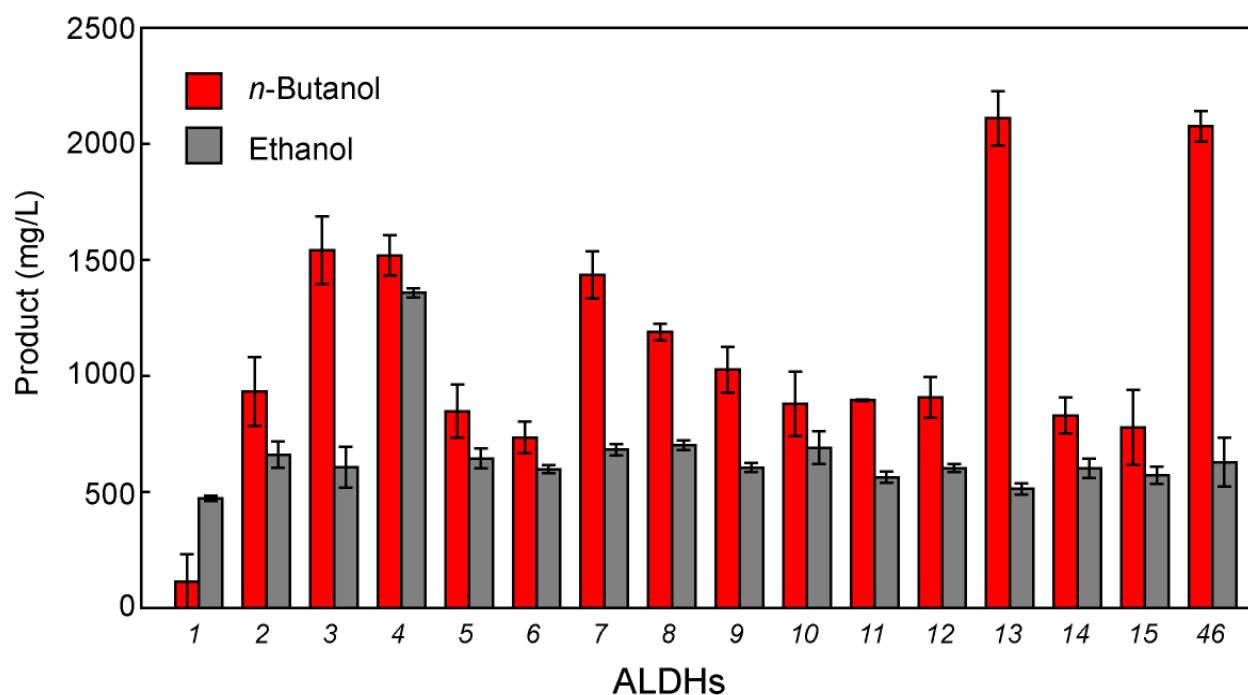

**Figure S7. Screening monofunctional ALDHs for production of 1,3-butanediol (BDO).** (A) The monofunctional ALDHs (ALDH1-16 and 46) were also screened *in vivo* for their ability to produce BDO. DH1 $\Delta$ 5 was co-transformed with pBT33-Bu2 and the pCDF3-ter.ALDH plasmid for *n*-butanol production or pT5T33-phaA.hbd and pCDF3-ALDH for BDO production. (B) The stereochemical preference of the ALDHs were then tested by screening for the production of (3*R*)- compared to (3*S*)-BDO by using either pT5T33-phaA.phaB or pT5T33-phaA.hbd upstream of the ALDH enzyme on pCDF3-ALDH to produce either (*R*)-3-hydroxybutyryl-CoA or (*S*)-3-hydroxybutyryl-CoA, respectively. These data suggest that little stereochemical preference at the ALDH is observed. All strains were grown anaerobically in TB with 2.5% (*w/v*) glucose media for 3 d post induction before analyzing production titers. Screening was performed using GC-MS for product peak identification. The same method as described for *n*-butanol analysis was used and the amount of product was quantified by comparison to a standard. Data are mean  $\pm$  s.d. of biological replicates (*n* = 3).

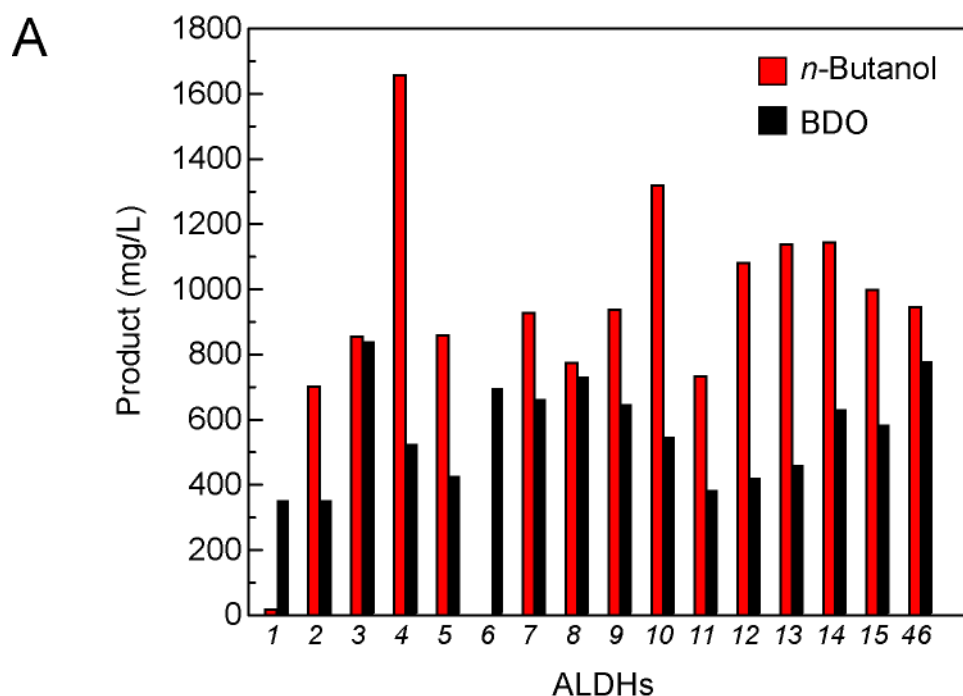

B

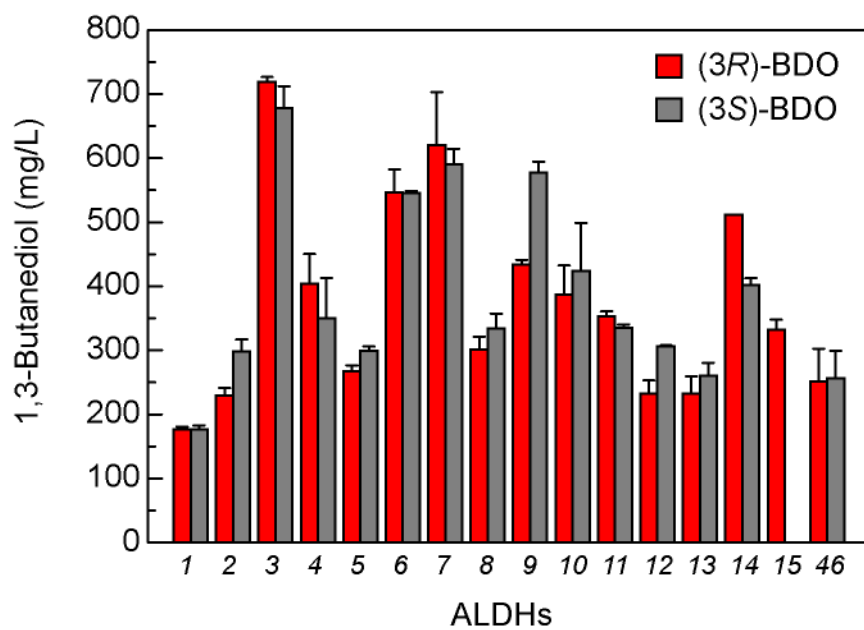

**Figure S8. Identification and screening of ADHs for BDO production.** (A) A sequence similarity network of the ADH family was generated to identify alcohol dehydrogenases that would efficiently reduce 3-hydroxybutyraldehyde to 1,3-butanediol. ADH sequences were blasted against each other and then clustered at increasingly stringent e-values, such that subfamilies become apparent. This network was then overlaid with ADHs of known substrate specificity as a frame of reference (BdhAB, butanol dehydrogenase; DhaT, 1,3-propanediol oxidoreductase; YqhD,  $C_3$  aldehyde reductase) [25–27]. (B) Sequences from the network were broadly sampled to maximize diversity and increase the likelihood of identifying a highly active ADH. (C) ADHs were also screened *in vivo* under anaerobic conditions for their ability to produce BDO by co-transforming DH1 $\Delta$ 5 pBBR1-aceEF.lpd pT533-phaA.phaB/hbd with a pCWori.trc-ter-aldh46.ADH plasmid (ADH1-22 and DhaT2-8). In this case, the ADHs appear to be selective for production of (3*R*)-BDO. All strains were grown anaerobically in TB with 2.5% (*w/v*) glucose media for 5 d post induction before analyzing production titers by GC-MS. Data are mean  $\pm$  s.d. of biological replicates ( $n = 3$ ).

A

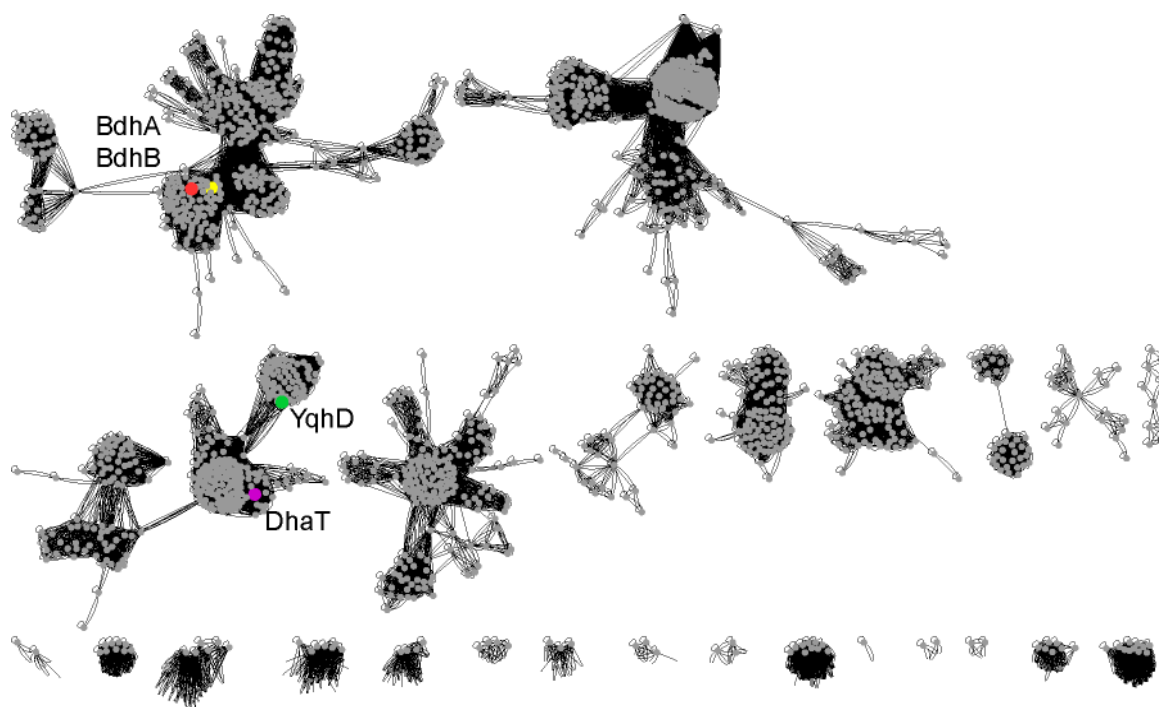

## B

| Gene  | Accession No. | Organism                                                 |
|-------|---------------|----------------------------------------------------------|
| ADH1  | B6YQP9_AZOPC  | <i>Azobacteroides pseudotrichonymphae</i> genomovar CFP2 |
| ADH2  | A0RQF7_CAMFF  | <i>Campylobacter fetus</i> subsp. <i>fetus</i> 82-40     |
| ADH3  | G5F136_9ACTN  | <i>Olsenella</i> sp. oral taxon 809 F0356                |
| ADH4  | B1C7G7_9FIRM  | <i>Anaerofustis stercorihominis</i> DSM 17244            |
| ADH5  | YUGK_BACSU    | <i>Bacillus subtilis</i> 168                             |
| ADH6  | A8SGI9_9FIRM  | <i>Faecalibacterium prausnitzii</i> M21/2                |
| ADH7  | E2SQ66_9FIRM  | <i>Erysipelotrichaceae bacterium</i> 3_1_53              |
| ADH8  | E1QYZ8_OLSUV  | <i>Olsenella uli</i> ATCC 49627                          |
| ADH9  | F5X0G1_STRG1  | <i>Streptococcus gallolyticus</i> ATCC 43143 / F-1867    |
| ADH10 | E6W4G5_DESIS  | <i>Desulfurispirillum indicum</i> ATCC BAA-1389 / S5     |
| ADH11 | E6K7W2_9BACT  | <i>Prevotella buccae</i> ATCC 33574                      |
| ADH12 | B1C4Z8_9FIRM  | <i>Clostridium spiroforme</i> DSM 1552                   |
| ADH13 | G4L3E3_TETHN  | <i>Tetragenococcus halophilus</i> strain DSM 20338       |
| ADH14 | E8LLW8_9GAMM  | <i>Succinatimonas hippei</i> YIT 12066                   |
| DhaT2 | E4RKV2_HALSL  | <i>Halanaerobium hydrogeniformans</i>                    |
| DhaT3 | Q15G22_CITFR  | <i>Citrobacter freundii</i>                              |
| DhaT4 | A0PY50_CLONN  | <i>Clostridium novyi</i> NT                              |
| DhaT5 | Q3A1K9_PELCD  | <i>Pelobacter carbinolicus</i> DSM 2380 / Gra Bd 1       |
| DhaT6 | A5D4X5_PELTS  | <i>Pelotomaculum thermopropionicum</i> DSM 13744         |
| DhaT7 | B1V2D9_CLOPF  | <i>Clostridium perfringens</i> D JGS1721                 |
| DhaT8 | E3H9G9_ILYPC  | <i>Ilyobacter polytropus</i> DSM 2926 / CuHBu1           |
| ADH15 | Q1JYE4_DESAC  | <i>Desulfuromonas acetoxidans</i> DSM 684                |
| ADH16 | B5YIE2_THEYD  | <i>Thermodesulfovibrio yellowstonii</i> ATCC 51303       |
| ADH17 | D2BSS7_DICD5  | <i>Dickeya dadantii</i> Ech586                           |
| ADH18 | F0ERB1_HAEP A | <i>Haemophilus parainfluenzae</i> ATCC 33392             |
| ADH19 | G5IQ05_9ENTE  | <i>Enterococcus saccharolyticus</i> 30_1                 |
| ADH20 | B2V5D0_CLOBA  | <i>Clostridium botulinum</i> Alaska E43 / Type E3        |
| ADH21 | E2SME8_9FIRM  | <i>Erysipelotrichaceae</i> sp. 3_1_53                    |
| ADH22 | B0NYL0_9CLOT  | <i>Clostridium</i> sp. SS2/1                             |

C

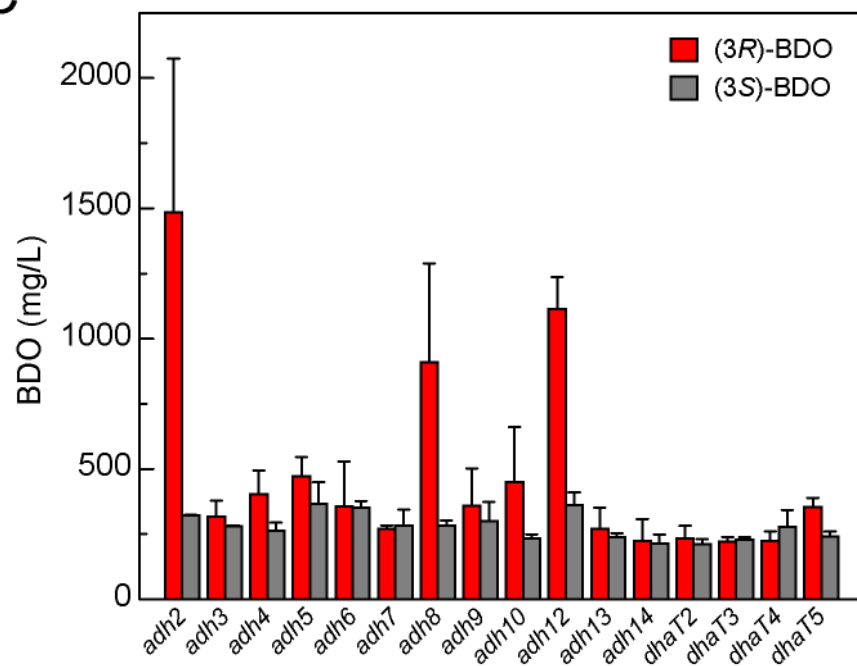

**Figure S9. Optimizing ALDH-ADH pairs for BDO vs. 4-hydroxybutanone (HB) production.**

Having identified a number of ALDHs and ADHs competent for high titer butanediol production, we screened the combinatorial set of candidate enzymes to find optimal combinations. (A) A preliminary *in vivo* screen of DH1Δ5 pT533-phaA.phaB pCWori.trc-ter-ALDH.ADH identified *aldh7.adh2* as the best overall performer for both BDO and HB production. Strains were grown anaerobically in TB with 2.5% (w/v) glucose media for 2 d post induction before analyzing production titers by LC-MS. Data are mean ± s.d. of biological replicates (n = 3). (B) To further optimize pathway selectivity, additional ADHs from the sequence similarity network were sampled to identify enzymes with greater specificity that would not enable hydroxybutanone production. The subfamilies containing ADH2, 8, and 12 were sampled at greater depth as these ADHs were shown to be most active in the initial screen. These screen identified a new optimal pair, *aldh3.adh22*, capable of capturing a large fraction of the C<sub>4</sub> product pool as butanediol and producing 3 g/L of total products. Strains were grown anaerobically in TB with 2.5% (w/v) glucose media for 3 d post induction before production titers were analyzed by LC-MS. Data are mean ± s.d. of biological replicates (n = 3).

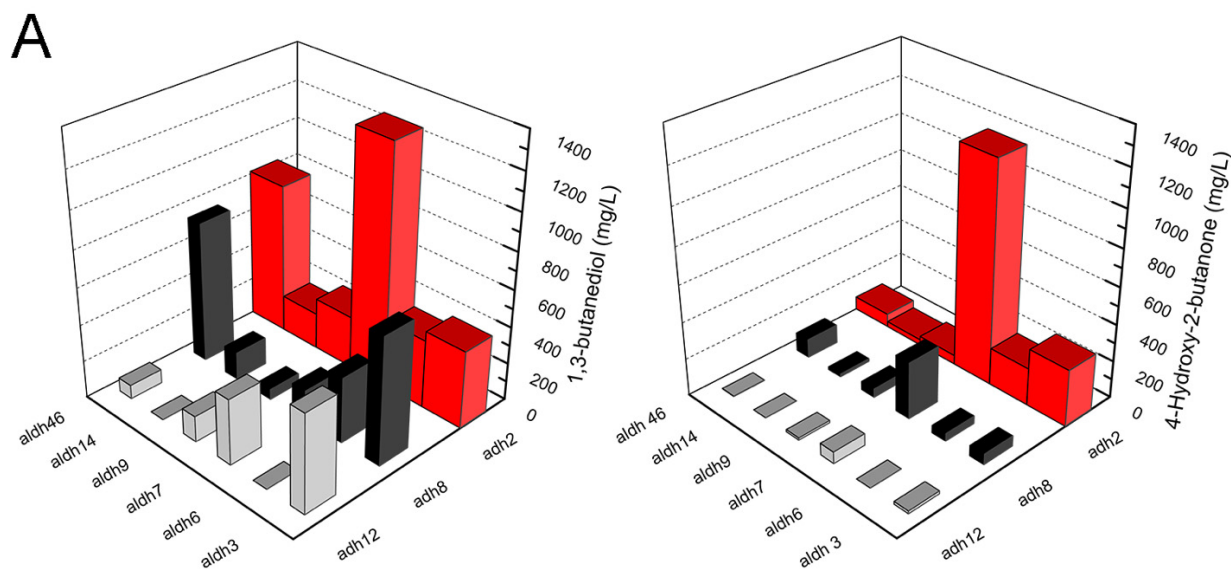



**B**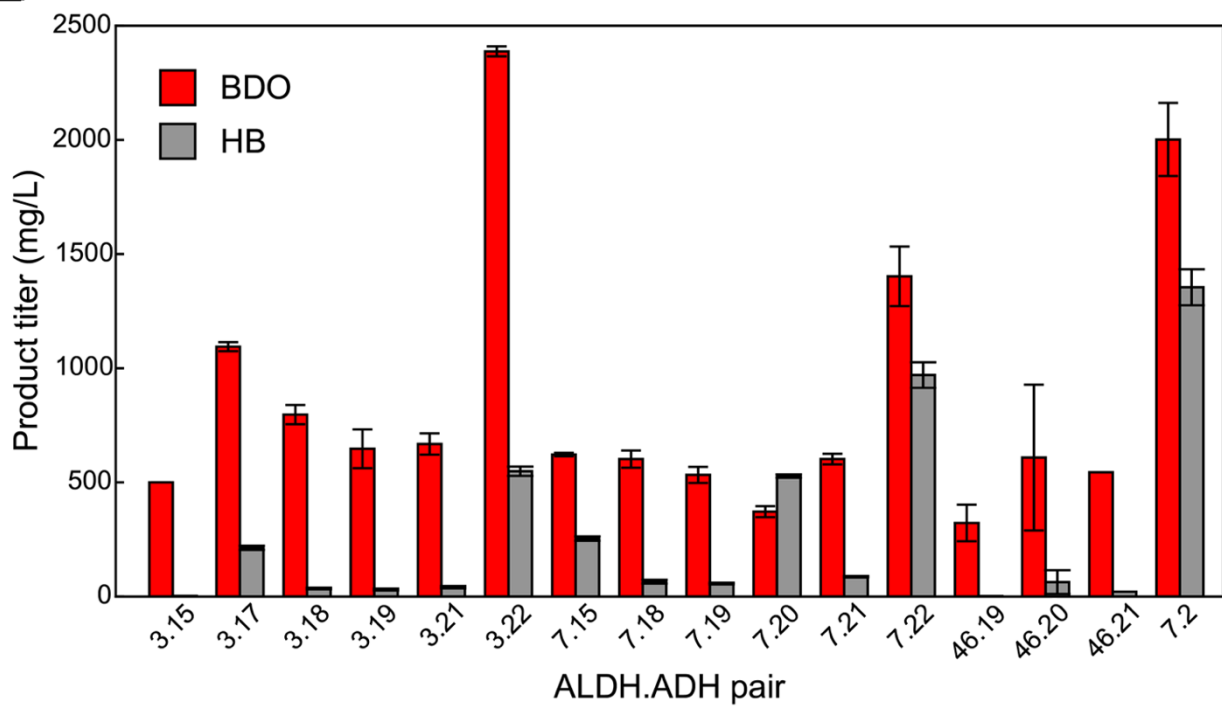

**Figure S10. Screening of secondary ADHs (sADHs) to increase BDO selectivity.** (A) A strategy for increasing the selectivity of BDO production is to use a secondary alcohol dehydrogenase (sADH) to reduce HB to BDO. (B) A list of sADHs that were either reported to reduce 4-hydroxy-2-butanone to 1,3-butanediol or have broad specificity for similar substrates was identified. A substantial number of these enzymes has been reported in bacteria, yeast, and parasitic protozoa. These enzymes are generally classified as zinc or iron-alcohol dehydrogenases and maximum percent identity within the sequences represented here range from 27–76%. (C) The identified sADHs were screened *in vivo* to characterize their BDO:HB selectivity by co-transforming DH1Δ5 pBBR1-aceEF.lpd pT533-phaA.phaB with a pCWori.trc-sadhX-aldh7.adh2 plasmid (sADH1-15). The parent plasmid pCWori.trc-ter-aldh7.adh2 produced an even mixture of BDO and HB and served as the negative control. At least four sADHs enabled butanediol production of 2 g/L with hydroxybutanone production limited to <250 mg/L or less. This pathway design appears to maximize BDO production as the dead-end pathway from acetoacetyl-CoA reduction is eliminated. Strains were grown anaerobically in TB with 2.5% (w/v) glucose media for 4 d post induction before analyzing production titers by LC-MS. Data are mean ± s.d. of biological replicates (n = 3).

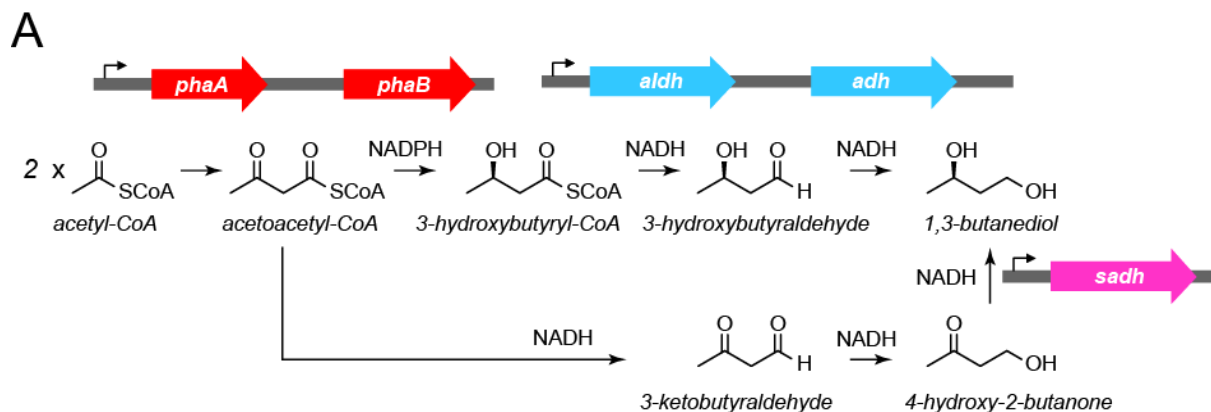

## B

| Gene   | Accession No.  | Organism                                | Reference                                       |
|--------|----------------|-----------------------------------------|-------------------------------------------------|
| sADH1  | KGK36767.1     | <i>Pichia kudriavzevii</i>              | R. C. Zheng <i>et al</i> [28]                   |
| sADH2  | WP_011011186.1 | <i>Pyrococcus furiosus</i> DSM 3638     | R. Machielsen and J. Oost <i>et al</i> [29, 30] |
| sADH3  | WP_011614641.1 | <i>Cupriavidus necator</i>              | A. Steinbüchel <i>et al</i> [31]                |
| sADH4  | P14941.1       | <i>Thermoanaerobacter brockii</i>       | R. J. Lamed <i>et al</i> [32]                   |
| sADH5  | AAA23199.2     | <i>Clostridium beijerinckii</i>         | A. A. Ismaiel <i>et al</i> [33]                 |
| sADH6  | XP_455102.1    | <i>Kluyveromyces lactis</i> NRRL Y-1140 | T. Oda <i>et al</i> [34]                        |
| sADH7  | AAP39869.1     | <i>Phytomonas</i> sp. ADU-2003          | S. M. Molinas <i>et al</i> [35]                 |
| sADH8  | Q0KDL6.1       | <i>Ralstonia eutropha</i> H16           | A. Steinbüchel <i>et al</i> [36]                |
| sADH9  | XP_001580601.1 | <i>Trichomonas vaginalis</i> G3         | R. Sutak and D. Leitsch <i>et al</i> [37,38]    |
| sADH10 | AJP52792.1     | <i>Pseudomonas fluorescens</i>          | C. T. Hou <i>et al</i> [39]                     |
| sADH11 | WP_011835462.1 | <i>Lactococcus lactis</i>               | N. García-Quintáns <i>et al</i> [40]            |
| sADH12 | AAC04974.1     | <i>Saccharomyces cerevisiae</i>         | E. González <i>et al</i> [41]                   |
| sADH13 | WP_000374004.1 | <i>Escherichia coli</i>                 | H. Zhang <i>et al</i> [42]                      |
| sADH14 | BAD32689.1     | <i>Zygoascus ofunaensis</i>             | K. Yamada Onodera <i>et al</i> [43]             |
| sADH15 | BAA24528.1     | <i>Candida parapsilosis</i>             | H. Yamamoto and H. Man <i>et al</i> [44,45]     |
| sADH16 | BAN45671.1     | <i>Cyberlindnera jadinii</i>            | T. Yang <i>et al</i> [46]                       |
| sADH17 | CAD36475.1     | <i>Rhodococcus ruber</i>                | B. Kosjek <i>et al</i> [47]                     |

## C

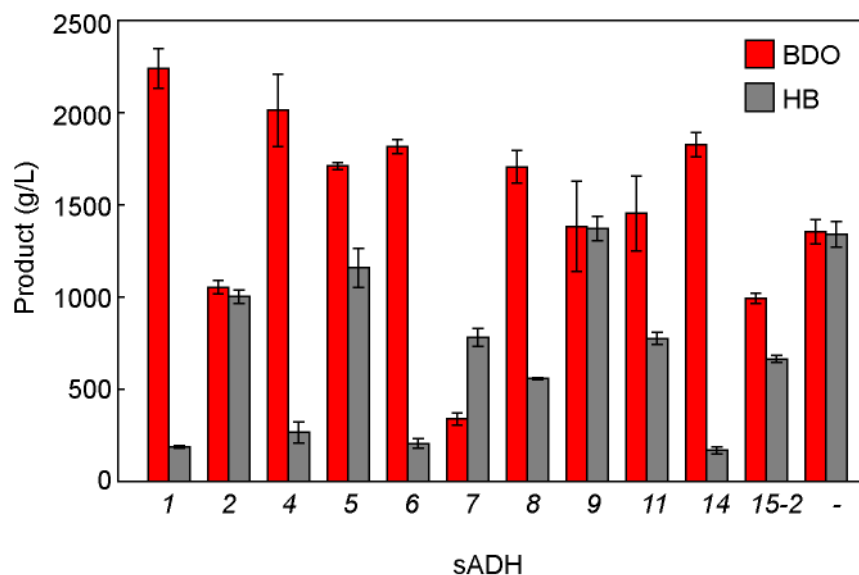

**Figure S11. Development of a genetic selection for *n*-butanol production.** Enrichment of higher productivity strains under anaerobic conditions. A small fraction of medium production strains (*E. coli* DH1Δ5 pBT-0.3crt pCDF3-ter.aldh46) were mixed in a large excess of a low production strain (*E. coli* DH1Δ5 pBT-0.03hbd pCDF3-ter.aldh46) to simulate a mutagenized library in which most mutations are neutral or deleterious. Over time the small fraction of medium production cells were found to proliferate and dominate the culture as monitored by qPCR (Figure 3). The length of the lag phase appears to correlate with the initial abundance of medium production cells. Strains were grown anaerobically in TB with 2.5% (w/v) glucose media over the course of 5 d, cultures containing the medium production strain were competent to attain high OD<sub>600</sub> and butanol titer.

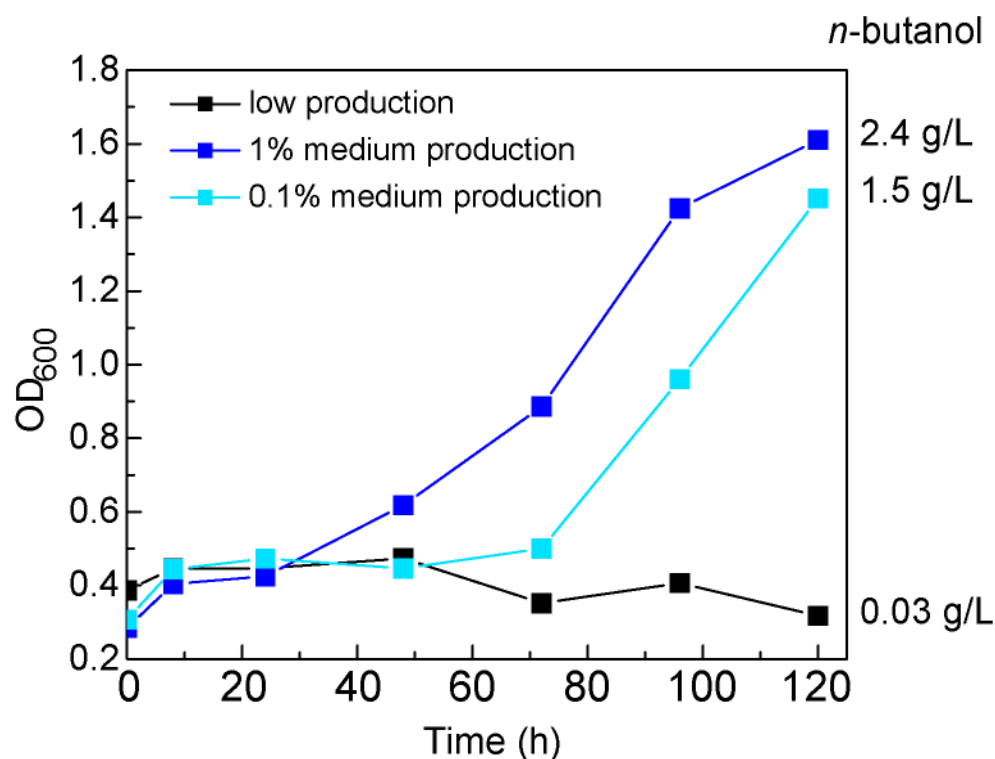

**Figure S12. Selection of *n*-butanol strains using EMS mutagenesis under anaerobic conditions.** *E. coli* DH1Δ5 pBBR1-aceEF.lpd and pBT33-Bu2 pCWori.trc-ter-aldh46.adh was treated with EMS for 60 min and then subjected to enrichment in M9 media under anaerobic conditions. A representative evolutionary trajectory is found below. Although improvements were observed, the gain in product titer plateaued within two rounds of mutagenesis. Genome sequencing of genomic DNA isolated from the pool identified ~150 SNPs with 95% overlap, suggesting both that a large number of neutral mutations occurred and that cultures progressed rapidly to genetic homogeneity under the selection conditions. *n*-Butanol titers were measured using GC-MS. Data are mean ± s.d. of biological replicates (n = 3).

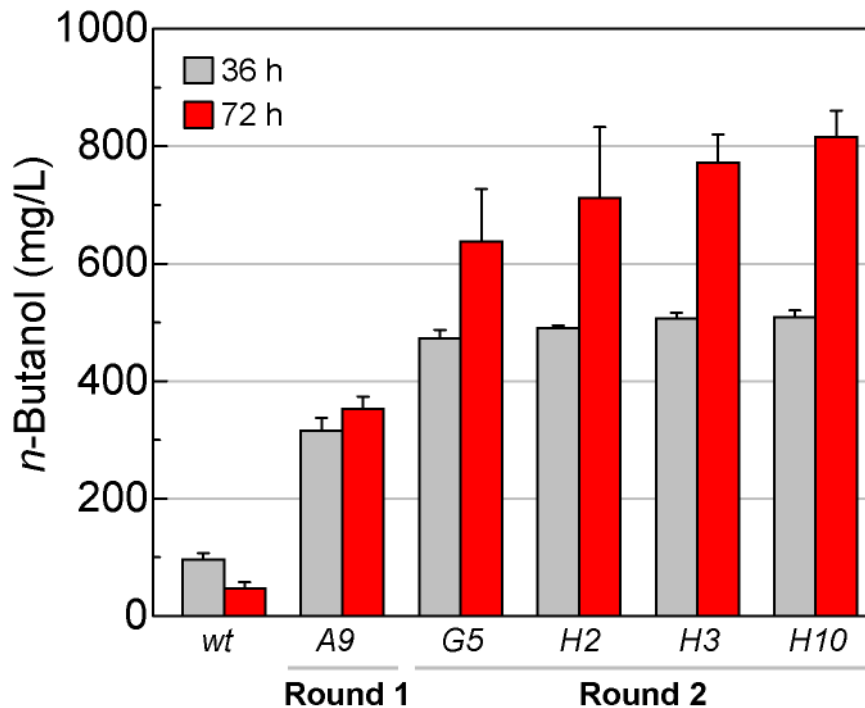

**Figure S13. Characterization of adaptive evolution of *n*-butanol strains under anaerobic conditions.** All selections were performed in triplicate with cultures supplemented with 2.5% (*w/v*) glucose. OD<sub>600</sub> for each flask was measured before every dilution. Production titers were validated in the selection media and controls represent *E. coli* parent strains freshly transformed with the appropriate plasmids. Strain labels indicate plasmids/flask-dilution number-clone number. Numbers above bars correspond to a unique identifier number for the sequenced strain with a shape indicating specific genetic loci mutated (*Table S1.A2*). (A) Adaptive evolution with *E. coli* DH1Δ5 as the host in LB media with three different *n*-butanol pathways. All strains contained the pBBR1-aceEF.lpd and pT5T33-Bu2 plasmids with different downstream plasmids (A, pCWori.trc-ter-aldh46.adh2; B, pCWori.trc-ter-aldh46.adh8; C, pCWori.trc-ter-aldh21.adh2). (B) Adaptive evolution with *E. coli* DH1Δ5 as the host in M9 media supplemented with 10% LB (*v/v*). The parent strains for this evolution were derived from the selection in LB media: A35-D35-2 (2622), C1-D41-1 (2625), C3-D35-1 (2628), and C3-D41-1 (2629). (C) Adaptive evolution with *E. coli* BW21153Δ5 as the host in M9 media supplemented with 10% LB (*v/v*). All strains contained the pBBR1-AceEF.Lpd and pT5T33-Bu2 plasmids with different downstream plasmids (A, pCWori.trc-ter-aldh46.adh2; B, pCWori.trc-ter-aldh46.adh8; C, pCWori.trc-ter-aldh21.adh2). (D) Adaptive evolution with various evolved strains in M9 media.

**A**

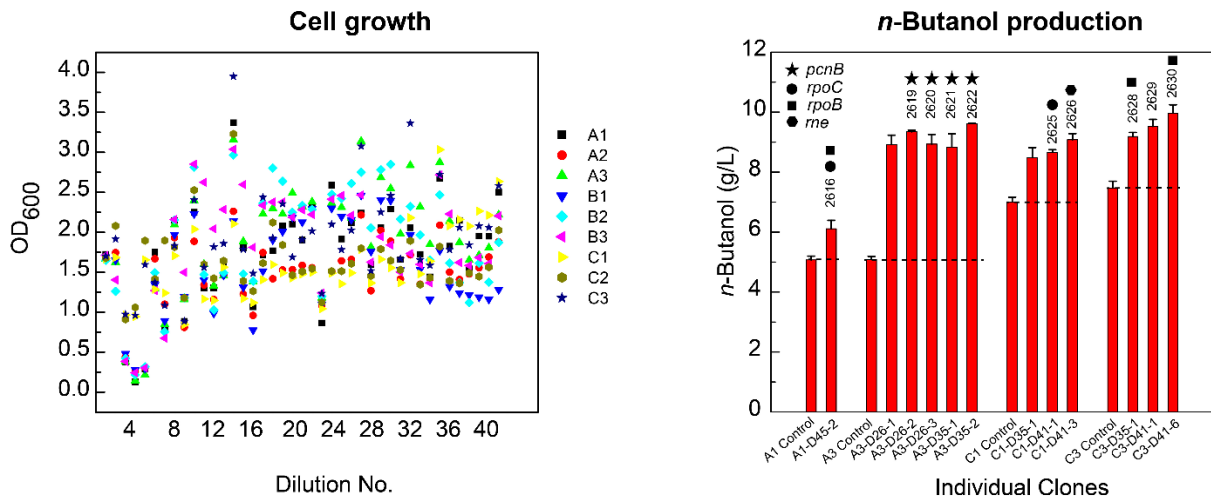

B

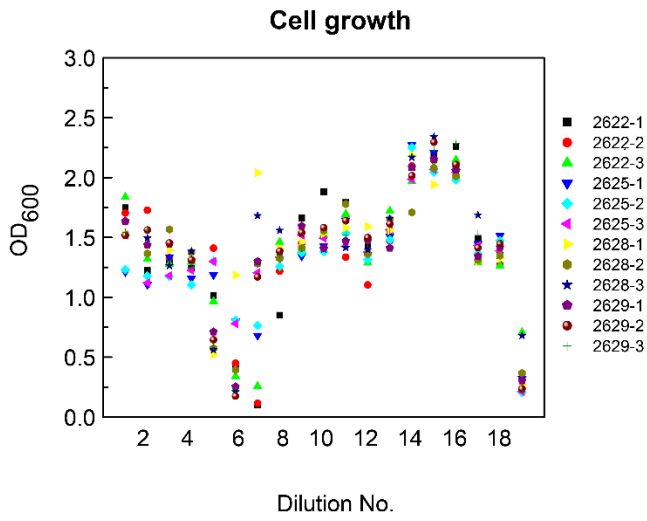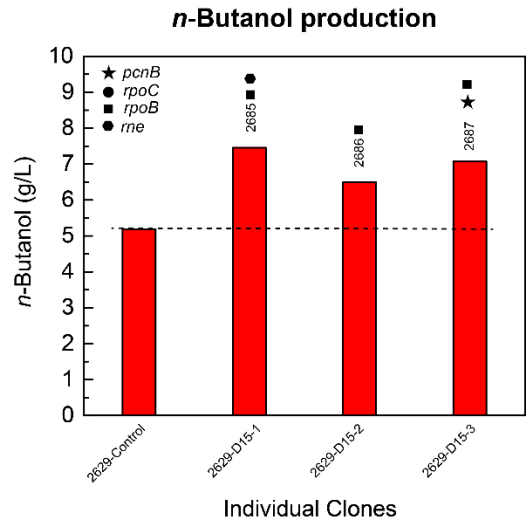

C

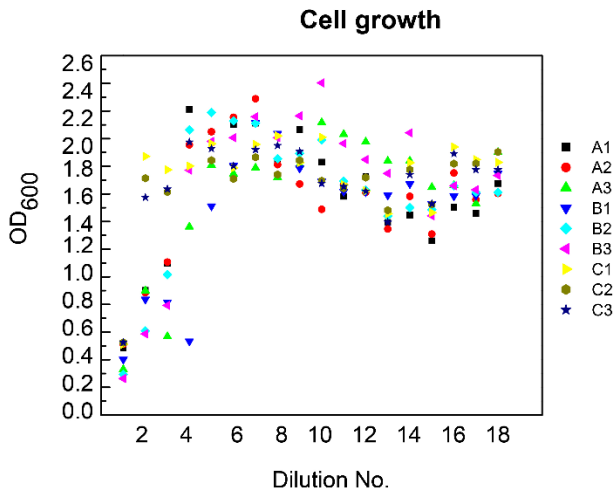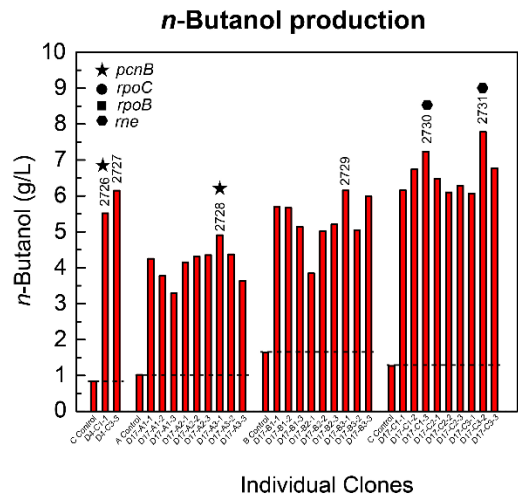

D

### Cell growth

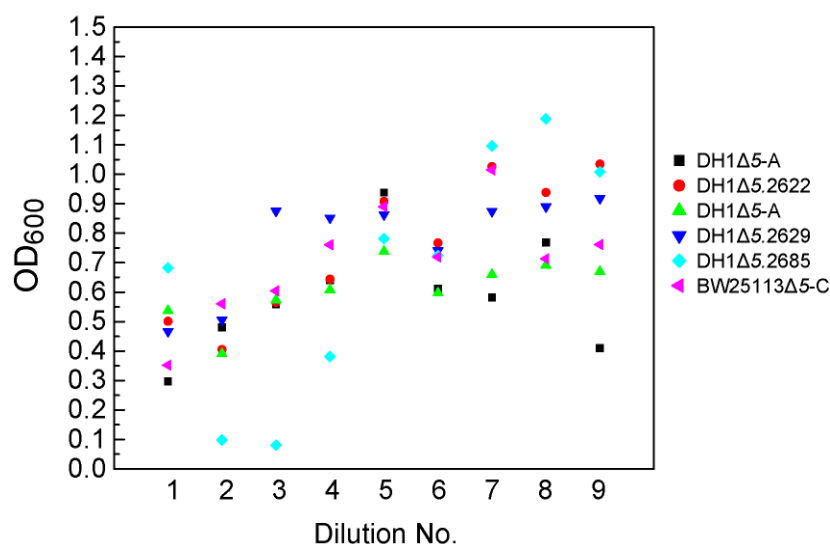

### n-Butanol production

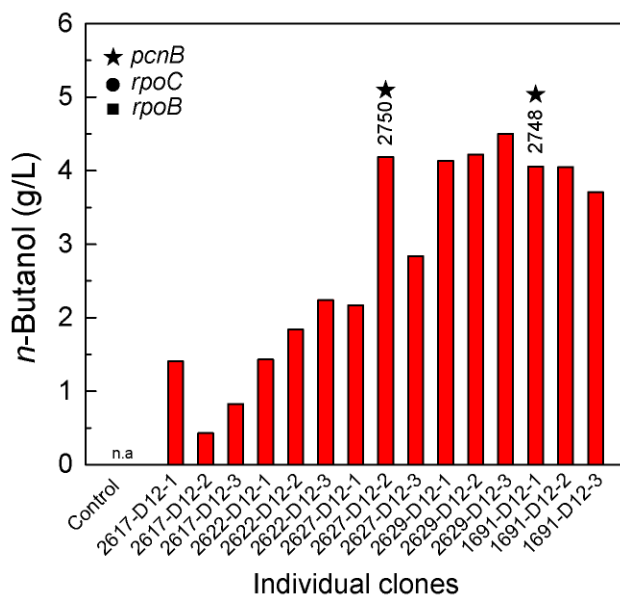

| Parent strain | Description                                                                      | Label  |
|---------------|----------------------------------------------------------------------------------|--------|
| DH1Δ5         | Pathway A                                                                        | 2617   |
| DH1Δ5.2622    | Isolated Pathway A clone from LB selection ( <i>Figure S14A: A3-D35-2</i> )      | 2622   |
| DH1Δ5         | Pathway C                                                                        | 2627   |
| DH1Δ5.2629    | Isolated Pathway C clone from LB selection ( <i>Figure S14A: C3-D41-1</i> )      | 2629   |
| DH1Δ5.2685    | Isolated Pathway C clone from M9/LB selection ( <i>Figure S14B: 2629-D15-1</i> ) | 2685   |
| BW25113Δ5     | Pathway C                                                                        | 1691-C |



**Figure S14. Characterization of adaptive evolution of BDO and HB strains under anaerobic conditions.** All selections were performed in triplicate with TB cultures supplemented with 2.5% (w/v) glucose. OD<sub>600</sub> for each flask was measured before every dilution. Production was validated in the selection media and controls represent *E. coli* parent strains freshly transformed with the appropriate plasmids. Strain labels indicate plasmids/flask-dilution number-clone number. Numbers above bars correspond to a unique identifier number for the sequenced strain with a shape indicating specific genetic loci mutated (*Table S1.A2*). (A) Growth curves of adaptive of HB and BDO evolution with (HB, strain A) DH1Δ5 pBBR1-aceEF.lpd pT533-phaA pCWori.trc-ter-aldh7.adh2, (BDO, strain B) DH1Δ5 pBBR1-aceEF.lpd pT533-phaA.phaB pCWori.trc-ter-aldh7.adh2, (BDO, strain C) DH1Δ5 pBBR1-aceEF.lpd pT533-phaA.phaB pCWori.trc-sadh1-aldh7.adh2. Cultures were grown (B) Control BDO and HB production with plasmids extracted from evolved strains and transformed into a clean parental *E. coli* DH1Δ5 host. (Strains A, B, and C, see Panel A description; Strain D, DH1Δ5 pBBR1-aceEF.lpd pT533-phaA.phaB pCWori.trc-aldh3.adh22). The similar production compared to fresh plasmids indicates that mutations responsible for increasing product titer are likely found on the chromosome. Strain numbers for evolved strains are indicated above each bar in the figure. Data are mean ± s.d. of biological replicates (n = 3).

A

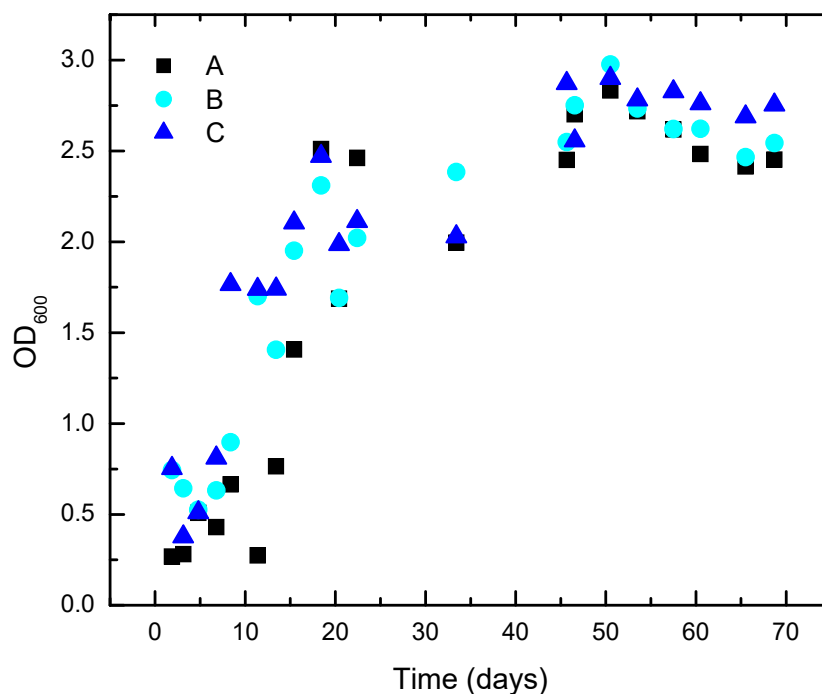

B

### Evolved parent strains

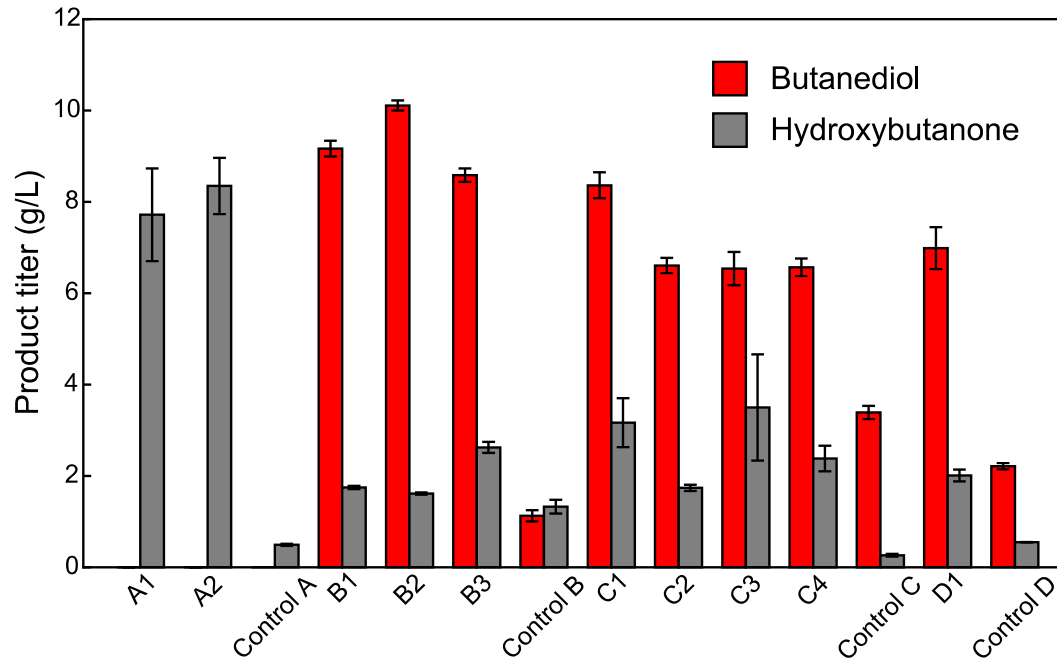

### Extracted plasmids transformed into clean host

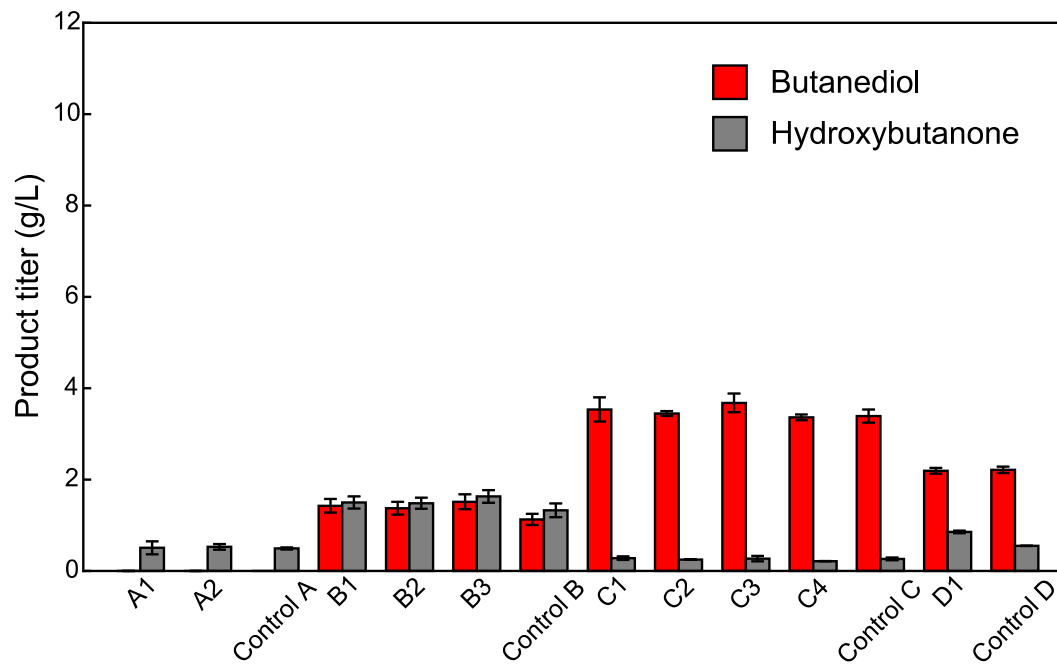

**Figure S15. Production titers of C4 monomers compared to parent strains.** Production titers in the parent DH1Δ5 strain compared to the evolved DH1Δ5.2622 strains both bearing the production plasmids pBBR1-aceEF.lpd pT5T33-Bu2 pCWori.trc-ter-aldh46.adh2 plasmids. Cells were cultured in TB media supplemented with 8% (w/v) glucose with a 20% (v/v) oleyl alcohol overlay. Data are mean ± s.d. of biological replicates (n = 3). (A) *n*-Butanol production by DH1Δ5.2622 pBBR1-aceEF.lpd pT5T33-Bu2 pCWori.trc-ter-aldh46.adh2 compared to the parental strain. The theoretical yield for this experiment is 37.6 g L<sup>-1</sup>, indicating that the evolved strain can utilize carbon sources other than glucose to produce *n*-butanol if it is consumed. (B) HB production in DH1Δ5.2403 pBBR1-aceEF.lpd pT5T33-phaA pCWori.trc-aldh7.adh2 and BDO production in DH1Δ5.2406 pBBR1-aceEF.lpd pT5T33-phaAB pCWori.trc-sadh1-aldh7.adh2 compared to the parental strains.

A

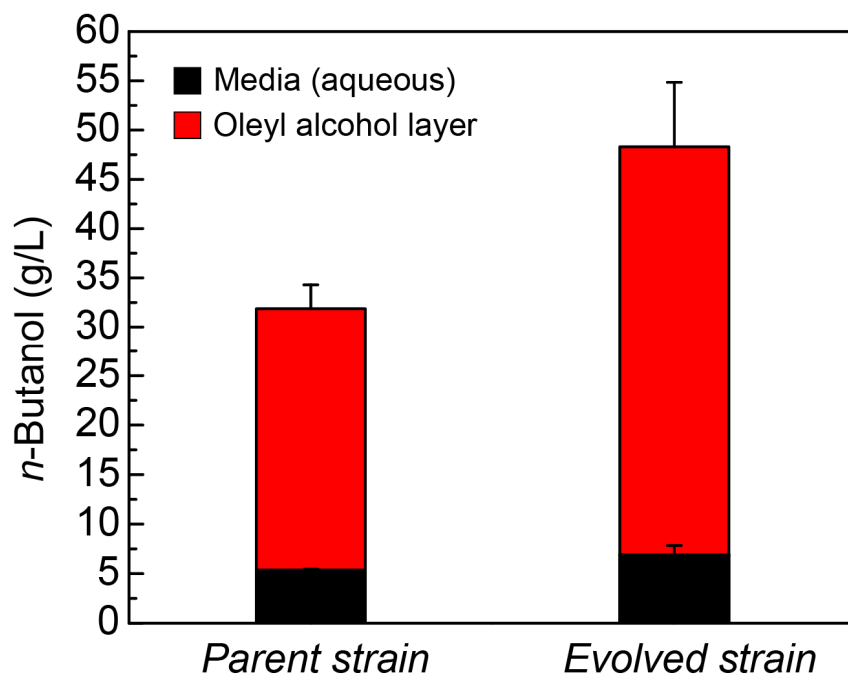

B

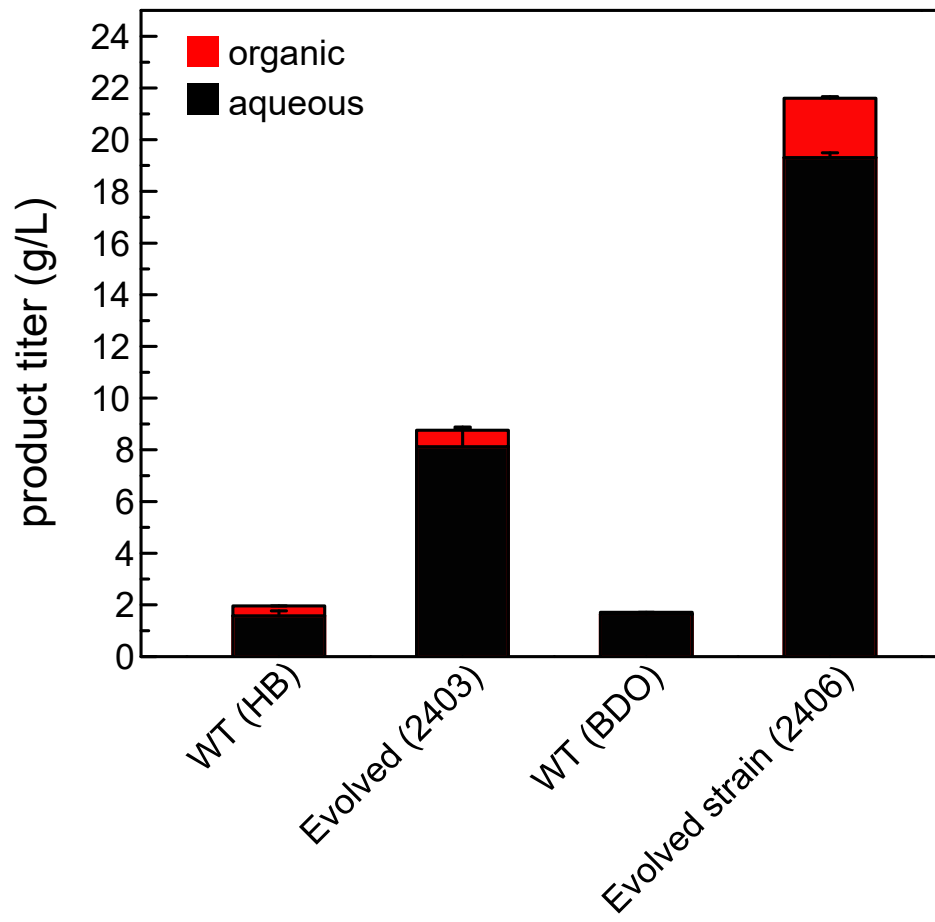

**Table S2. Genome sequencing of evolved strains.** 31 different evolved strains were sequenced along with the DH1 $\Delta$ 5 or BW25115 $\Delta$ 5 parent strain. Reads were mapped to the reference genome of DH1 or BW25113 and analyzed for changes including SNPs as well as rearrangements using Breseq. (A) Predicted point mutations in the coding region. (B) Predicted point mutations in intergenic regions. (C) Unassigned new junctions evidence. Each new junction consists of two rows, one describing one side of the junction in the reference sequence. (D) Missing coverage evidence. Full tables of differences between parent and evolved strains.

## A

| Product              | Gene        | Codon change                                      | Amino acid change             | Strain #                     |
|----------------------|-------------|---------------------------------------------------|-------------------------------|------------------------------|
| 4-hydroxy-2-butanone | <i>pcnB</i> | GGC → GCC                                         | G141A                         | 2403, 2404                   |
| 1,3-butanediol       | <i>pcnB</i> | CGC → CTC                                         | R149L                         | 2406                         |
|                      |             | CGC → CAC                                         | R149H                         | 2409                         |
|                      |             | CCT → ACT                                         | P78T                          | 2410                         |
|                      |             | TTG → TGG                                         | L208W                         | 2411                         |
|                      | <i>rpoC</i> | ATG → CTG                                         | M466L                         | 2405, 2406, 2408             |
|                      |             | $\Delta$ ACCAAGCGTAAAAAGCTG (634 - 651 nt)        | $\Delta$ TKRKKL (212 - 217)   | 2412                         |
|                      | <i>rsmB</i> | CAA → AAA                                         | Q314K                         | 2409                         |
|                      | <i>pyrG</i> | GAT → GAA                                         | D42E                          | 2411                         |
|                      | <i>pspE</i> | TCA → CCA                                         | S14P                          |                              |
|                      | <i>dcuA</i> | CAG → CCG                                         | Q64P                          |                              |
|                      | <i>pnp</i>  | $\Delta$ GGCATATCTCTGAGTTCGCACGCGT (1636-1662 nt) | $\Delta$ GDISEFAPR (546- 554) | 2407                         |
| <i>n</i> -butanol    | <i>pcnB</i> | GAT → GAG                                         | D194E                         | 2619, 2620, 2621, 2622       |
|                      |             | GCT → ACT                                         | A98T                          | 2687                         |
|                      |             | CGC → CCC                                         | R149P                         | 2750                         |
|                      |             | GAA → GCA                                         | E108A                         | 2748                         |
|                      |             | AAC → CAC                                         | N138H                         | 2726                         |
|                      |             | $\Delta$ G (1176 nt)                              | Frame shift after D391        | 2728                         |
|                      | <i>rpoC</i> | GGT → CGT                                         | G 1161 R                      | 2616                         |
|                      |             | AAA → GAA                                         | K1192E                        | 2625                         |
|                      | <i>rpoB</i> | GAC → GCC                                         | D199A                         | 2616                         |
|                      |             | GGC → GTC                                         | G467V                         | 2628, 2630, 2685, 2686, 2687 |
|                      | <i>rne</i>  | CGT → AGT                                         | R373S                         | 2626                         |
|                      |             | AAA → AAC                                         | K255N                         | 2685                         |
|                      |             | CGC → CTC                                         | R109L                         | 2730                         |
|                      |             | CGC → CAC                                         | R488H                         | 2731                         |
|                      | <i>lysP</i> | GTT → GCT                                         | V276A                         | 2685, 2686, 2687             |
|                      | <i>pnp</i>  | ATC → AAC                                         | I541N                         | 2686                         |
|                      | <i>gluQ</i> | add ACG (887 nt)                                  | add S298                      | 2727                         |
|                      | <i>cadB</i> | TGA → AGA                                         | stop 41 R (pseudogene)        | 2616, 2630, 2685, 2686, 2687 |

# B

| Product              | Gene                                 | Description                                                                     | Mutation  | Annotation               | Position  | Strain #   |
|----------------------|--------------------------------------|---------------------------------------------------------------------------------|-----------|--------------------------|-----------|------------|
| 4-hydroxy-2-butanone | ECDH1_10830 /<br>ECDH1_RS10835       | hypothetical protein /nad(p)<br>transhydrogenase subunit alpha                  | + GGT     | intergenic (-38 / -486)  | 2,200,089 | 2403, 2404 |
| 1,3-butanediol       | ECDH1_RS07795 /<br>ECDH1_RS07800     | hypothetical protein / nucleoid-associated<br>protein                           | (T)8 to 9 | intergenic (-59 / -123)  | 1,592,789 | 2410       |
| <i>n</i> -butanol    | ECDH1_RS10460 /<br>ECDH1_RS10465     | hypthetical proteion / 4Fe-4S ferredoxin                                        | C to T    | intergenic (+146 / -309) | 2,123,692 | 2625       |
|                      | ECDH1_RS21465 / rrf                  | UDP-N-acetylenolpyruvoyglucosamine<br>reductase / 5S ribomsal RNA               | C to T    | intergenic (-276 / +27)  | 4,342,689 | 2625       |
|                      | rrf / ECDH1_RS21275                  | 5S ribosomal RNA / 23S ribosomal RNA                                            | Δ 1 bp    | intergenic (-70 / +8)    | 4,301,498 | 2630       |
|                      | BW25113_RS00715 /<br>BW25113_RS00720 | polynucleotide adenytransferase pcnB /<br>tRNA glutamyl-Q(34) synthetase GluQRS | C to T    | intergenic (-43 / +50)   | 155,623   | 2729       |

C

| Product   | Number  | Position                 | Annotation                                    | Gene                                                                                       | Product                                                                                    | Strain                                               |
|-----------|---------|--------------------------|-----------------------------------------------|--------------------------------------------------------------------------------------------|--------------------------------------------------------------------------------------------|------------------------------------------------------|
| HB        | 1       | 2787052                  | intergenic (-8)-579)                          | <i>ECDH1_RS13893</i> ppgA                                                                  | GDDEF domain-containing protein/poly-beta-1,6 N-acetyl-D-glucosamine export porin PpgA     | 2404                                                 |
|           |         | 3970989                  | intergenic (-38)+14)                          | <i>ECDH1_RS19625</i> <i>ECDH1_RS19630</i>                                                  | tyrosine recombinase/transposase                                                           |                                                      |
|           | 2       | 2787061                  | intergenic (-17)-570)                         | <i>ECDH1_RS13893</i> ppgA                                                                  | GDDEF domain-containing protein/poly-beta-1,6 N-acetyl-D-glucosamine export porin PpgA     | 2404                                                 |
|           |         | 3850914                  | intergenic (+252)+249)                        | <i>ECDH1_RS19025</i> <i>ECDH1_RS19030</i>                                                  | 30S ribosomal protein S20/transposase                                                      |                                                      |
| 3         | 2991284 | intergenic (-234)-36)    | <i>ECDH1_RS14845</i> <i>ECDH1_RS14845</i>     | hypothetical protein/transporter                                                           | 2404                                                                                       |                                                      |
|           | 3851581 | intergenic (+15)+178)    | <i>ECDH1_RS19030</i> <i>ECDH1_RS19035</i>     | transposase/transcriptional activator NhaR                                                 |                                                                                            |                                                      |
| 4         | 2991272 | intergenic (-242)-28)    | <i>ECDH1_RS14845</i> <i>ECDH1_RS14845</i>     | hypothetical protein/transporter                                                           | 2404                                                                                       |                                                      |
|           | 3850814 | intergenic (+252)+249)   | <i>ECDH1_RS19025</i> <i>ECDH1_RS19030</i>     | 30S ribosomal protein S20/transposase                                                      |                                                                                            |                                                      |
| BDO       | 1       | 1967355                  | coding (1762)13 nt)                           | <i>ECDH1_RS09640</i>                                                                       | HTH domain-containing protein                                                              | 2405, 2407                                           |
|           |         | 2200475                  | intergenic (-424)+100)                        | <i>ECDH1_RS10830</i> <i>ECDH1_RS10835</i>                                                  | hypothetical protein/NAD(P) transhydrogenase subunit alpha                                 |                                                      |
|           | 2       | 1968549                  | pseudogene (3)824 nt)                         | <i>ECDH1_RS09650</i>                                                                       | DNA-binding transcriptional regulator KdgR                                                 | 2405, 2407                                           |
|           |         | 2200472                  | intergenic (-424)+103)                        | <i>ECDH1_RS10830</i> <i>ECDH1_RS10835</i>                                                  | hypothetical protein/NAD(P) transhydrogenase subunit alpha                                 |                                                      |
|           | 3       | 1588747                  | intergenic (-58)+87)                          | <i>ECDH1_RS07770</i> <i>ECDH1_RS07775</i>                                                  | hypothetical protein/ISS family transposase                                                | 2405                                                 |
|           |         | 2566298                  | coding (29)1720 nt)                           | <i>ECDH1_RS12695</i>                                                                       | protein TonB                                                                               |                                                      |
|           | 4       | 1588746                  | intergenic (+98)+88)                          | <i>ECDH1_RS07770</i> <i>ECDH1_RS07775</i>                                                  | hypothetical protein/ISS family transposase                                                | 2406                                                 |
|           |         | 2200475                  | intergenic (-424)+100)                        | <i>ECDH1_RS10830</i> <i>ECDH1_RS10835</i>                                                  | hypothetical protein/NAD(P) transhydrogenase subunit alpha                                 |                                                      |
|           | 5       | 1772306                  | intergenic (+146)+481)                        | <i>ECDH1_RS08610</i> <i>ECDH1_RS08615</i>                                                  | ISS family transposase/phosphogluconate dehydrogenase (NADP(+)-dependent, decarboxylating) | 2406                                                 |
|           |         | 2200472                  | intergenic (-424)+103)                        | <i>ECDH1_RS10830</i> <i>ECDH1_RS10835</i>                                                  | hypothetical protein/NAD(P) transhydrogenase subunit alpha                                 |                                                      |
|           | 6       | 3970034                  | intergenic (-120)+94)                         | <i>fmaA</i> <i>ECDH1_RS19620</i>                                                           | type-1 fibrinol protein, A chain/hypothetical protein                                      | 2406, 2412                                           |
|           |         | 3970348                  | intergenic (+32)+48)                          | <i>ECDH1_RS19620</i> <i>ECDH1_RS19625</i>                                                  | hypothetical protein/tyrosine recombinase                                                  |                                                      |
|           | 7       | 3970042                  | intergenic (-128)+96)                         | <i>fmaA</i> <i>ECDH1_RS19620</i>                                                           | type-1 fibrinol protein, A chain/hypothetical protein                                      | 2406, 2412                                           |
|           |         | 3970338                  | intergenic (+22)+58)                          | <i>ECDH1_RS19620</i> <i>ECDH1_RS19625</i>                                                  | hypothetical protein/tyrosine recombinase                                                  |                                                      |
|           | 8       | 2200472                  | intergenic (-424)+103)                        | <i>ECDH1_RS10830</i> <i>ECDH1_RS10835</i>                                                  | hypothetical protein/NAD(P) transhydrogenase subunit alpha                                 | 2408                                                 |
| 2449684   |         | intergenic (-2)+68)      | <i>ECDH1_RS12045</i> <i>ECDH1_RS12045</i>     | enterobacterial <i>fliC</i> Lon family protein/ISS family transposase                      |                                                                                            |                                                      |
| 9         | 2200475 | intergenic (-424)+100)   | <i>ECDH1_RS10830</i> <i>ECDH1_RS10835</i>     | hypothetical protein/NAD(P) transhydrogenase subunit alpha                                 | 2408                                                                                       |                                                      |
|           | 2450879 | pseudogene (2)11216 nt)  | <i>ECDH1_RS12050</i>                          | enterobacterial <i>fliC</i> Lon family protein                                             |                                                                                            |                                                      |
| 10        | 3872608 | coding (20)141 nt)       | <i>ECDH1_RS19135</i>                          | hypothetical protein                                                                       | 2409                                                                                       |                                                      |
|           | 4006344 | coding (28)5267 nt)      | <i>ECDH1_RS19830</i>                          | transposase                                                                                |                                                                                            |                                                      |
| 11        | 3872612 | coding (18)141 nt)       | <i>ECDH1_RS19135</i>                          | hypothetical protein                                                                       | 2409                                                                                       |                                                      |
|           | 4005127 | coding (28)5369 nt)      | <i>ECDH1_RS19830</i>                          | transposase                                                                                |                                                                                            |                                                      |
| 12        | 2668860 | pseudogene (5)345 nt)    | <i>ECDH1_RS13215</i>                          | hypothetical protein                                                                       | 2410, 2411                                                                                 |                                                      |
|           | 2670689 | coding (28)9789 nt)      | <i>ECDH1_RS13230</i>                          | integrase                                                                                  |                                                                                            |                                                      |
| 13        | 2668875 | pseudogene (20)345 nt)   | <i>ECDH1_RS13215</i>                          | hypothetical protein                                                                       | 2410, 2411                                                                                 |                                                      |
|           | 2670672 | coding (30)6789 nt)      | <i>ECDH1_RS13230</i>                          | integrase                                                                                  |                                                                                            |                                                      |
| 14        | 1772305 | intergenic (+145)+482)   | <i>ECDH1_RS08610</i> <i>ECDH1_RS08615</i>     | ISS family transposase/phosphogluconate dehydrogenase (NADP(+)-dependent, decarboxylating) | 2410                                                                                       |                                                      |
|           | 2568303 | coding (28)6720 nt)      | <i>ECDH1_RS12695</i>                          | protein TonB                                                                               |                                                                                            |                                                      |
| 15        | 1771774 | coding (04)61167 nt)     | <i>ECDH1_RS05585</i>                          | O <sup>-</sup> antigen polymerase                                                          | 2411                                                                                       |                                                      |
|           | 1775112 | pseudogene (4)74450 nt)  | <i>ECDH1_RS05605</i>                          | ribose transferase                                                                         |                                                                                            |                                                      |
| n-butanol | 1       | 1361359                  | intergenic (+30)+170)                         | <i>ECDH1_RS06715</i> <i>ECDH1_RS06720</i>                                                  | sensor domain-containing phosphodiesterase/IS4 family transposase                          | 2616                                                 |
|           |         | 1998641                  | coding (112)960 nt)                           | <i>ECDH1_RS09820</i>                                                                       | hypothetical protein                                                                       |                                                      |
|           | 2       | 1362696                  | intergenic (+55)+32)                          | <i>ECDH1_RS06720</i> <i>ECDH1_RS06725</i>                                                  | IS4 family transposase/nucleoside permease NupC                                            | 2616                                                 |
|           |         | 1998651                  | coding (122)960 nt)                           | <i>ECDH1_RS09820</i>                                                                       | hypothetical protein                                                                       |                                                      |
|           | 3       | 3970034                  | intergenic (-120)+94)                         | <i>fmaA</i> <i>ECDH1_RS19620</i>                                                           | type-1 fibrinol protein, A chain/hypothetical protein                                      | 2616, 2619, 2620, 2621, 2622, 2628, 2630, 2686, 2687 |
|           |         | 3970348                  | intergenic (+32)+48)                          | <i>ECDH1_RS19620</i> <i>ECDH1_RS19625</i>                                                  | hypothetical protein/tyrosine recombinase                                                  |                                                      |
|           | 4       | 3970042                  | intergenic (-128)+96)                         | <i>fmaA</i> <i>ECDH1_RS19620</i>                                                           | type-1 fibrinol protein, A chain/hypothetical protein                                      | 2616, 2619, 2620, 2621, 2622, 2628, 2630, 2686, 2687 |
|           |         | 3970338                  | intergenic (+22)+58)                          | <i>ECDH1_RS19620</i> <i>ECDH1_RS19625</i>                                                  | hypothetical protein/tyrosine recombinase                                                  |                                                      |
|           | 5       | 2668860                  | pseudogene (5)345 nt)                         | <i>ECDH1_RS13215</i>                                                                       | hypothetical protein                                                                       | 2620, 2626, 2687, 2750                               |
|           |         | 2670689                  | coding (28)9789 nt)                           | <i>ECDH1_RS13230</i>                                                                       | integrase                                                                                  |                                                      |
|           | 6       | 2668875                  | pseudogene (20)345 nt)                        | <i>ECDH1_RS13215</i>                                                                       | hypothetical protein                                                                       | 2620, 2626, 2687, 2650                               |
|           |         | 2670672                  | coding (30)6789 nt)                           | <i>ECDH1_RS13230</i>                                                                       | integrase                                                                                  |                                                      |
|           | 7       | 3971755                  | intergenic (-249)+491)                        | <i>ECDH1_RS19630</i> <i>ECDH1_RS19635</i>                                                  | transposase/tyrosine recombinase                                                           | 2620                                                 |
|           |         | 3978093                  | coding (69)81017 nt)                          | <i>ECDH1_RS19665</i>                                                                       | hypothetical protein                                                                       |                                                      |
|           | 8       | 300335                   | coding (29)1417 nt)                           | <i>ECDH1_RS01430</i>                                                                       | hypothetical protein                                                                       | 2626                                                 |
|           |         | 1606068                  | coding (66)1567 nt)                           | <i>ECDH1_RS07850</i>                                                                       | protein Rtn                                                                                |                                                      |
|           | 9       | 1606076                  | coding (58)1567 nt)                           | <i>ECDH1_RS07850</i>                                                                       | protein Rtn                                                                                | 2626                                                 |
|           |         | 3851581                  | intergenic (+15)+178)                         | <i>ECDH1_RS19030</i> <i>ECDH1_RS19035</i>                                                  | transposase/transcriptional activator NhaR                                                 |                                                      |
|           | 10      | 3203305                  | coding (40)1428 nt)                           | <i>ECDH1_RS15885</i>                                                                       | HscC co-chaperone, uncharacterized J domain-containing protein                             | 2626                                                 |
|           |         | 3577058                  | intergenic (+146)+287)                        | <i>ECDH1_RS17705</i> <i>ECDH1_RS17710</i>                                                  | ISS family transposase/hypothetical protein                                                |                                                      |
|           | 11      | 4075991                  | coding (60)8309 nt)                           | <i>ECDH1_RS20165</i>                                                                       | hypothetical protein                                                                       | 2628, 2630, 2685, 2686, 2687                         |
|           |         | 4079177                  | pseudogene (1)381959 nt)                      | <i>ECDH1_RS20175</i>                                                                       | 2',3'-cyclic-nucleotide 2'-phosphodiesterase                                               |                                                      |
|           | 12      | 4079177                  | pseudogene (1)381959 nt)                      | <i>ECDH1_RS20175</i>                                                                       | 2',3'-cyclic-nucleotide 2'-phosphodiesterase                                               | 2628                                                 |
|           |         | 4154154                  | coding (115)81539 nt)                         | <i>ECDH1_RS20595</i>                                                                       | transcriptional regulator                                                                  |                                                      |
|           | 13      | 4079944                  | intergenic (+15)+144)                         | <i>ECDH1_RS20180</i> <i>ECDH1_RS20185</i>                                                  | transposase/HaIR family transcriptional regulator                                          | 2628                                                 |
|           |         | 4154148                  | coding (150)1539 nt)                          | <i>ECDH1_RS20595</i>                                                                       | transcriptional regulator                                                                  |                                                      |
| 14        | 3505052 | coding (40)33075 nt)     | <i>lacZ</i>                                   | beta-galactosidase                                                                         | 2630                                                                                       |                                                      |
|           | 3505051 | coding (412)3075 nt)     | <i>lacZ</i>                                   | beta-galactosidase                                                                         |                                                                                            |                                                      |
| 15        | 3503981 | coding (94)960 nt)       | <i>lacI</i>                                   | lac repressor                                                                              | 2686                                                                                       |                                                      |
|           | 3503728 | coding (161)960 nt)      | <i>lacI</i>                                   | lac repressor                                                                              |                                                                                            |                                                      |
| 16        | 2678611 | intergenic (+1)+29)      | <i>ECDH1_RS13290</i> <i>ECDH1_RS13295</i>     | integrase/transposase                                                                      | 2750                                                                                       |                                                      |
|           | 3044783 | intergenic (-15)+126)    | <i>ECDH1_RS15080</i> <i>ECDH1_RS15085</i>     | dehydrogenase/DNA-binding protein YvbB                                                     |                                                                                            |                                                      |
| 17        | 360753  | coding (86)8360 nt)      | <i>lacI</i>                                   | lac repressor                                                                              | 2726, 2729, 2730                                                                           |                                                      |
|           | 360815  | coding (86)8360 nt)      | <i>lacI</i>                                   | lac repressor                                                                              |                                                                                            |                                                      |
| 18        | 1203246 | coding (29)630 nt)       | <i>BW25113_RS05990</i>                        | hypothetical protein                                                                       | 2728, 2729                                                                                 |                                                      |
|           | 1203075 | intergenic (-6)+68)      | <i>BW25113_RS06005</i> <i>BW25113_RS06010</i> | phage tail protein/DNA-invertase from lambdoid prophage e14                                |                                                                                            |                                                      |
| 19        | 361480  | coding (181)960 nt)      | <i>lacI</i>                                   | lac repressor                                                                              | 2729                                                                                       |                                                      |
|           | 361540  | coding (81)960 nt)       | <i>lacI</i>                                   | lac repressor                                                                              |                                                                                            |                                                      |
| 20        | 1203261 | coding (30)5830 nt)      | <i>BW25113_RS05990</i>                        | hypothetical protein                                                                       | 2729                                                                                       |                                                      |
|           | 1205058 | coding (12)495 nt)       | <i>BW25113_RS06005</i>                        | phage tail protein                                                                         |                                                                                            |                                                      |
| 21        | 376718  | coding (28)444 nt)       | <i>BW25113_RS01855</i>                        | transferase                                                                                | 2730                                                                                       |                                                      |
|           | 563704  | intergenic (+1)+67)      | <i>BW25113_RS02785</i> <i>BW25113_RS02790</i> | protein ren/multidrug SMR transporter                                                      |                                                                                            |                                                      |
| 22        | 503898  | pseudogene (20)213 nt)   | <i>BW25113_RS03785</i>                        | protein ren                                                                                | 2730                                                                                       |                                                      |
|           | 1462169 | pseudogene (2)212928 nt) | <i>BW25113_RS03790</i>                        | hypothetical protein                                                                       |                                                                                            |                                                      |
| 23        | 3313550 | coding (131)51518 nt)    | <i>BW25113_RS16450</i>                        | phosphate starvation-inducible protein PstE                                                | 2730                                                                                       |                                                      |
|           | 3578788 | coding (26)1417 nt)      | <i>BW25113_RS17825</i>                        | hypothetical protein                                                                       |                                                                                            |                                                      |
| 24        | 3313557 | coding (130)51518 nt)    | <i>BW25113_RS16450</i>                        | phosphate starvation-inducible protein PstE                                                | 2730                                                                                       |                                                      |
|           | 3577555 | intergenic (+15)+564)    | <i>BW25113_RS17830</i> <i>BW25113_RS17835</i> | transposase/hair-shock protein                                                             |                                                                                            |                                                      |
| 25        | 3179456 | intergenic (+132)+90)    | <i>BW25113_RS15795</i> <i>BW25113_RS15800</i> | fimbria-like adhesin protein/transposase                                                   | 2748                                                                                       |                                                      |
|           | 3995194 | coding (40)9361 nt)      | <i>BW25113_RS18815</i>                        | magnesium transporter CorA                                                                 |                                                                                            |                                                      |
| 26        | 3995189 | coding (40)8461 nt)      | <i>BW25113_RS18815</i>                        | magnesium transporter CorA                                                                 | 2748                                                                                       |                                                      |
|           | 4469328 | intergenic (+11)+166)    | <i>BW25113_RS22180</i> <i>BW25113_RS23025</i> | inotriase/phosphoethanolamine transferase YigX                                             |                                                                                            |                                                      |

# D

| Product           | Start               | End                 | Size        | Gene                                | Strain                                                                                                                                                                                                                                                                                                                                                                                                                                                                                                                                                                                                                                                                                                                                                                                                                                                                                                                                                                                       |                                 |
|-------------------|---------------------|---------------------|-------------|-------------------------------------|----------------------------------------------------------------------------------------------------------------------------------------------------------------------------------------------------------------------------------------------------------------------------------------------------------------------------------------------------------------------------------------------------------------------------------------------------------------------------------------------------------------------------------------------------------------------------------------------------------------------------------------------------------------------------------------------------------------------------------------------------------------------------------------------------------------------------------------------------------------------------------------------------------------------------------------------------------------------------------------------|---------------------------------|
| BDO               | 1702686–<br>1703700 | 1771773             | 68074–69088 | [ECDH1_RS08295]–<br>[ECDH1_RS08585] | [ECDH1_RS08295], ECDH1_RS08300,<br>ECDH1_RS08305, ECDH1_RS08310,<br>ECDH1_RS08315, ECDH1_RS08320,<br>ECDH1_RS08325, ECDH1_RS08330,<br>ECDH1_RS08335, ECDH1_RS08340,<br>ECDH1_RS08350, ECDH1_RS08355,<br>ECDH1_RS08360, ECDH1_RS08365,<br>ECDH1_RS08370, ECDH1_RS08375,<br>ECDH1_RS08380, ECDH1_RS08385,<br>ECDH1_RS08390, ECDH1_RS08395,<br>ECDH1_RS08400, ECDH1_RS08405,<br>ECDH1_RS08410, ECDH1_RS08415,<br>ECDH1_RS08420, ECDH1_RS08425,<br>ECDH1_RS08430, ECDH1_RS08435,<br>ECDH1_RS08440, ECDH1_RS08445,<br>ECDH1_RS08450, ECDH1_RS08455,<br>ECDH1_RS08460, ECDH1_RS08465,<br>ECDH1_RS08470, ECDH1_RS08475,<br>ECDH1_RS08480, ECDH1_RS08485,<br>ECDH1_RS08490, ECDH1_RS08495,<br>ECDH1_RS08500, ECDH1_RS08505,<br>ECDH1_RS08510, ECDH1_RS08515,<br>ECDH1_RS08520, ECDH1_RS08525,<br>ECDH1_RS08530, ECDH1_RS08535,<br>ECDH1_RS08540, ECDH1_RS08545,<br>ECDH1_RS08550, ECDH1_RS08555,<br>ECDH1_RS08560, ECDH1_RS08565,<br>ECDH1_RS08570, ECDH1_RS08575,<br>ECDH1_RS08580, [ECDH1_RS08585] | 2411                            |
| <i>n</i> -butanol | 3971196–<br>3971755 | 3978092             | 6338–6897   | [ECDH1_RS19630]–<br>[ECDH1_RS19665] | [ECDH1_RS19630], ECDH1_RS19635,<br>ECDH1_RS19640, ECDH1_RS19645,<br>ECDH1_RS19650, ECDH1_RS19655,<br>ECDH1_RS19660, [ECDH1_RS19665]                                                                                                                                                                                                                                                                                                                                                                                                                                                                                                                                                                                                                                                                                                                                                                                                                                                          | 2620                            |
|                   | 3192268–<br>3193273 | 3203304             | 10032–11037 | [ECDH1_RS15835]–<br>[ECDH1_RS15885] | [ECDH1_RS15835], ECDH1_RS15840,<br>ECDH1_RS15845, ECDH1_RS15850, artP,<br>ECDH1_RS15860, ECDH1_RS15865,<br>ECDH1_RS15870, ECDH1_RS15875,<br>ECDH1_RS15880, [ECDH1_RS15885]                                                                                                                                                                                                                                                                                                                                                                                                                                                                                                                                                                                                                                                                                                                                                                                                                   | 2626                            |
|                   | 4075592             | 4079775–<br>4079178 | 3587–4184   | [ECDH1_RS20165]–<br>[ECDH1_RS20180] | [ECDH1_RS20165], ECDH1_RS20170,<br>ECDH1_RS20175, [ECDH1_RS20180]                                                                                                                                                                                                                                                                                                                                                                                                                                                                                                                                                                                                                                                                                                                                                                                                                                                                                                                            | 2228, 2630, 2685,<br>2686, 2687 |
|                   | 2435616             | 2436637             | 1022        | ECDH1_RS11980                       | ECDH1_RS11980                                                                                                                                                                                                                                                                                                                                                                                                                                                                                                                                                                                                                                                                                                                                                                                                                                                                                                                                                                                | 2630                            |



**Figure S16. Cell lysate enzyme activities of *n*-butanol pathway enzymes for parent and evolved strains.** Enzyme activities were measured in cell lysate of parent and evolved strains to examine whether increased heterologous expression of pathway enzymes could be the source for increases in *n*-butanol titer. DH1Δ5.2616 was compared to its parent, DH1Δ5 pBBR1-aceEF.lpd pT5T33-Bu2 pCWori.trc-ter-aldh46.adh2. BW25113Δ5.2730 was compared to its parent, BW25113Δ5 pBBR1-aceEF.lpd pT5T33-Bu2 pCWori.trc-ter-aldh21.adh2. There is no significant activity differences for the four enzymes tested between the parent and evolved strains, leading us to conclude that differential pathway enzyme expression is not a major factor. Data are mean ± s.d. of biological replicates (n = 3).

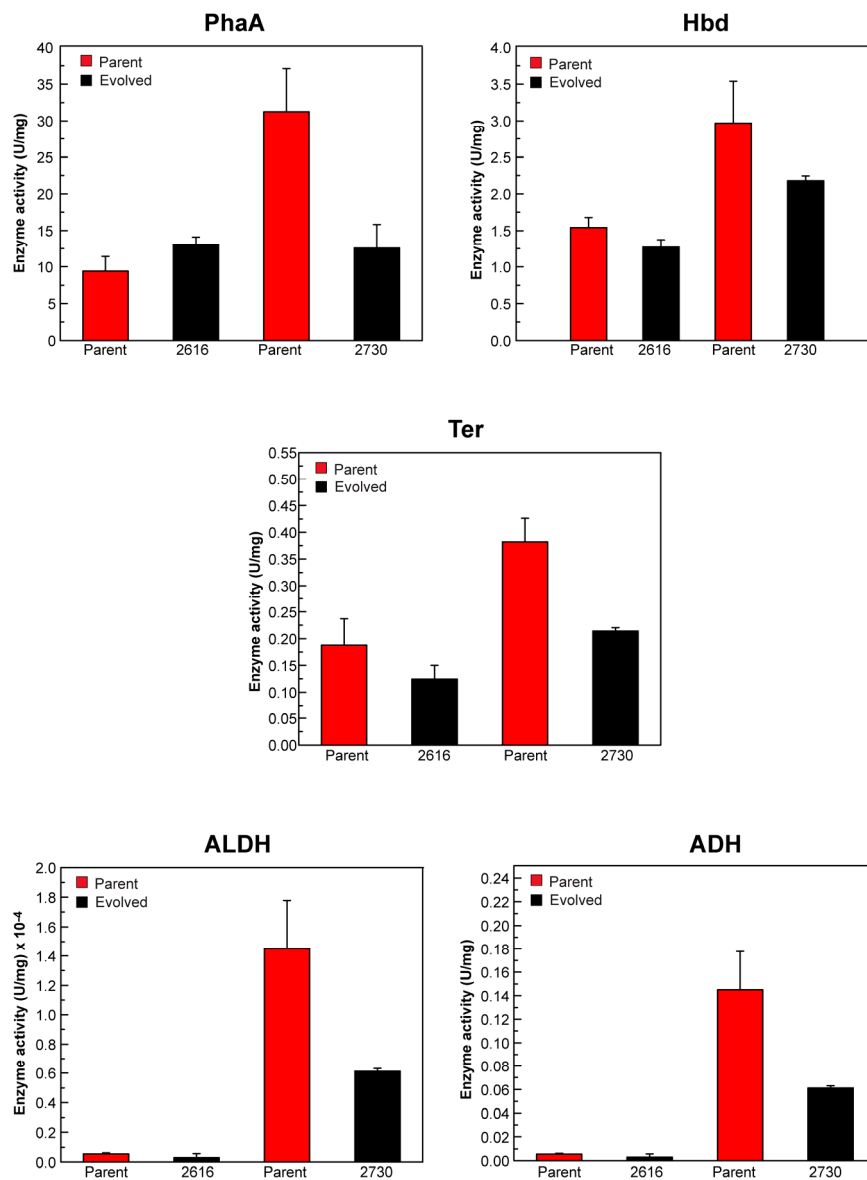

**Figure S17. RNA-Sequencing analysis of parent and evolved BDO strains.** Volcano plot of RNA sequencing data of the parent DH1Δ5 pBBR1.aceEF.lpd pT533-phaA.phaB pCWori.trc-ter-aldh7.adh2 compared to the evolved strain (DH1Δ5.2406), generated by Sleuth.

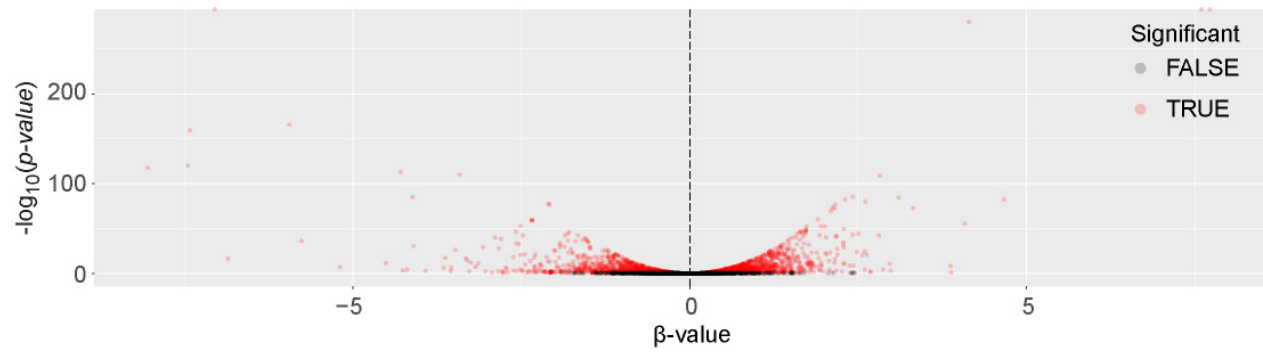

**Figure S18. COG analysis of differentially expressed genes.** COG categories were identified by the IMG-ER annotation pipeline. COG categories represented by genes that are upregulated and downregulated 24 h after induction with IPTG. Comparison of COG category representation in the differentially expressed genes compared to the entire genome. The number of open reading frames represented by each COG is given, and the percentage of total genes with COG categories is in parentheses. Since some genes fall into multiple COG categories, the percentage was calculated by dividing the total number of unique genes.

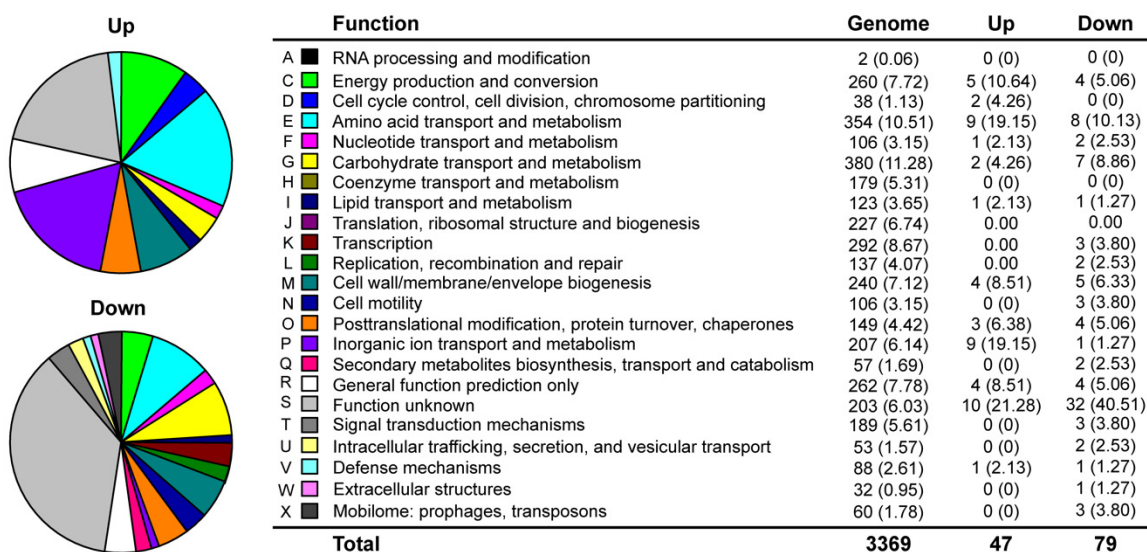

**Figure S19. Acetyl-CoA pool analysis between parent, mutant, and the evolved strain.** Biomass was harvested after 24 h growth under anaerobic conditions after IPTG induction. Metabolites were extracted using freeze and thaw cycles and supernatants were run on LC-MS/MS for acetyl-CoA quantification. Data showed introducing the *pcnB* and *rpoC* mutations found in DH1Δ5.2406 in a clean genetic background (DH1Δ5 parent) resulted in a ~2 fold increased in acetyl-CoA pool compared to the parent strain, which captures the same phenotype observed in the evolved strain. All three hosts carried pT533-phaA.phaB, pCWori.trc-aldh7.adh2, and pBBR1-aceE.F.lpd. Parent: DH1Δ5; PcnB\_R149L RpoC\_M466L: DH1Δ5\_2406\_pcnB(R149L)\_rpoC(M466L); Evolved strain : DH1Δ5.2406. Data are mean ± s.d. of biological replicates (n = 5).

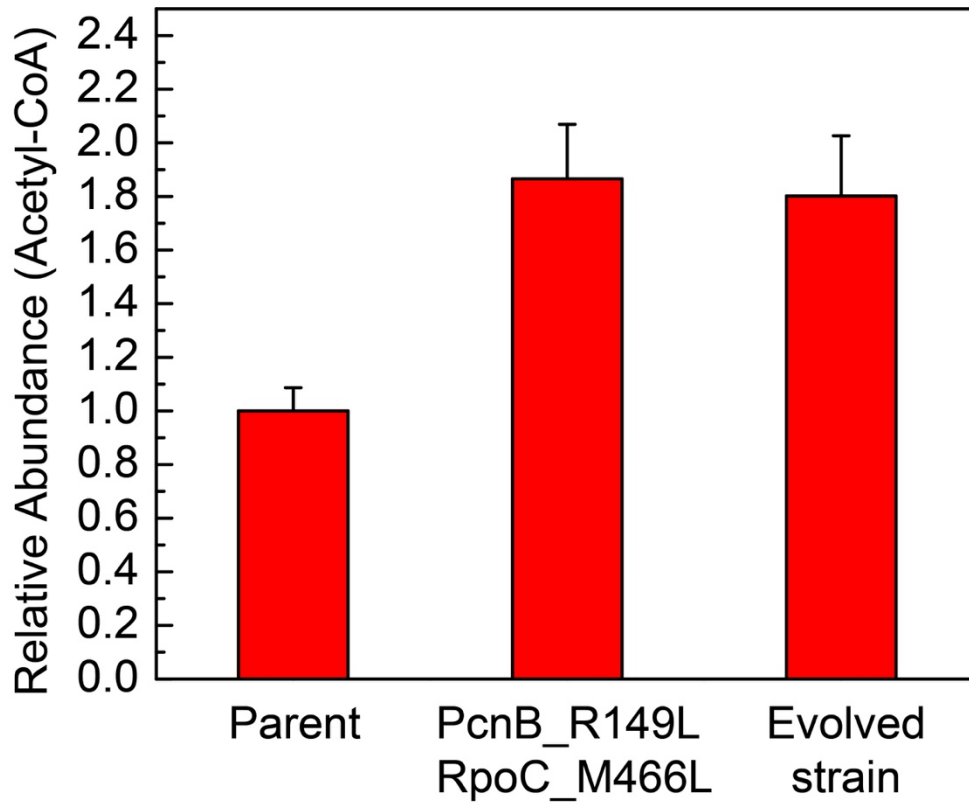

**Figure S20. GO enrichment of differentially expressed genes.** Enrichment of GO terms among genes differentially expressed between the parent (DH1Δ5 pT533-phaA.phaB pCWori.trc-ALDH7.ADH2) and evolved BDO strain (DH1Δ5.2406). The number of genes belonging to each enriched GO term is listed in addition to fold enrichment (FE) and false discovery rate (FDR). Downregulated and upregulated genes were analyzed separately.

| <b>Downregulated</b> |                                       |          |           |                    |
|----------------------|---------------------------------------|----------|-----------|--------------------|
| <b>GO</b>            | <b>Biological Process</b>             | <b>#</b> | <b>FE</b> | <b>FDR</b>         |
| GO:0006412           | Translation                           | 28       | 2.65      | 1×10 <sup>-3</sup> |
| GO:0006520           | Cellular amino acid metabolic process | 59       | 2.3       | 9×10 <sup>-6</sup> |
| GO:0009117           | Nucleotide metabolic process          | 27       | 2.14      | 2×10 <sup>-2</sup> |
| GO:0006950           | Response to stress                    | 31       | 1.97      | 3×10 <sup>-2</sup> |
| <b>Upregulated</b>   |                                       |          |           |                    |
| <b>GO</b>            | <b>Biological Process</b>             | <b>#</b> | <b>FE</b> | <b>FDR</b>         |
| GO:0006810           | Transport                             | 82       | 1.95      | 1×10 <sup>-4</sup> |

## References

1. Datsenko, K. A. and Wanner, B. L. One-step inactivation of chromosomal genes in *Escherichia coli* K-12 using PCR products. *Proc. Natl. Acad. Sci. U. S. A.* **97**, 6640-6645 (2009).
2. Zhou, S., Shanmugam, K.T., Yomano, L.P. Grabar, T. P., and Ingram, L. O. Fermentation of 12% (w/v) Glucose to 1.2 M Lactate by *Escherichia coli* Strain SZ194 using mineral salts medium. *Biotechnol. Lett.* **28**, 663–670 (2006).
3. Jantama, K., Haupt, M. J., Svoronos, S. A., Zhang, X., Moore, J. C., Shanmugam, K. T., and Ingram, L. O., Combining metabolic engineering and metabolic evolution to develop nonrecombinant strains of *Escherichia coli* C that produce succinate and malate. *Biotechnol. Bioeng.* **99**, 1140-1153 (2008).
4. Gibson, D. G. *et al.* Enzymatic assembly of DNA molecules up to several hundred kilobases. *Nat. Methods* **6**, 343–345 (2009).
5. Engler, C. and Marillonnet, S. Golden Gate cloning. *Methods Mol Biol* **1116**, 119–131 (2014).
6. Bond-Watts, B. B., Bellerose, R. J., and Chang, M. C. Y. Enzyme mechanism as a kinetic control element for designing synthetic biofuel pathways. *Nat. Chem. Biol.* **7**, 222–227 (2011).
7. Chung, C. C. *et al.* A fluorescence-based thiol quantification assay for ultra-high-throughput screening for inhibitors of coenzyme A production. *Assay Drug Dev. Technol.* **6**, 361–374 (2008).
8. Deatherage, D. E., and Barrick, J. E. Identification of mutations in laboratory-evolved microbes from next-generation sequencing data using breseq. *Methods Mol Biol* **1151**, 165–188 (2014).
9. Davis, J. T. *et al.* Biosynthetic thiolase from *Zoogloea ramigera*. I. Preliminary characterization and analysis of proton transfer reaction. *J. Biol. Chem.* **262**, 82–9 (1987).
10. Bray, N. L., Pimentel, H., Melsted, P., and Pachter, L. Near-optimal probabilistic RNA-seq quantification. *Nat. Biotechnol.* **34**, 525–527 (2016).
11. Pimentel, H., Bray, N. L., Puente, S., Melsted, P., and Pachter, L. Differential analysis of RNA-seq incorporating quantification uncertainty. *Nat. Methods* **14**, 687–690 (2017).
12. Markowitz, V. M. *et al.* IMG: The Integrated Microbial Genomes database and comparative analysis system. *Nucleic Acids Res.* **40**, D115-22 (2012).
13. Thomas, P. D., Ebert, D., Muruganujan, A., Mushayahama, T., Albou, L.-P. & Mi, H. PANTHER: Making genome-scale phylogenetics accessible to all. *Protein Science* **31**, 8–22 (2022).
14. Mi, H., Muruganujan, A., Huang, X., Ebert, D., Mills, C., Guo, X. & Thomas, P. D. Protocol Update for Large-scale genome and gene function analysis with PANTHER Classification System (v.14.0). *Nat Protoc* **14**, 703–721 (2019).
15. Jiang, W., Bikard, D., Cox, D., Zhang, F., and Marraffini, L. A. RNA-guided editing of bacterial genomes using CRISPR-Cas systems. *Nat. Biotechnol.* **31**, 233–239 (2013).

16. Chen, W., Zhang, Y., Yeo, W.-S., Bae, T., and Ji, Q. Rapid and Efficient genome editing in *Staphylococcus aureus* by using an engineered CRISPR/Cas9 system. *J. Am. Chem. Soc.* **139**, 3790–3795 (2017).
17. Long, J. Z. *et al.* Ablation of PM20D1 reveals N-acyl amino acid control of metabolism and nociception. *Proc. Natl. Acad. Sci. U. S. A.* **115**, E6937-E6945 (2018).
18. Toth, J., Ismaiel, A. A., and Chen, J.-S. The *ald* gene, encoding a coenzyme A-acylating aldehyde dehydrogenase, distinguishes *Clostridium beijerinckii* and two other solvent-producing Clostridia from *Clostridium acetobutylicum*. *Appl. Environ. Microbiol.* **65**, 4973–4980 (1999).
19. Yan, R. T., and Chen, J. S. Coenzyme A-acylating aldehyde dehydrogenase from *Clostridium beijerinckii* NRRL B592. *Appl. Environ. Microbiol.* **56**, 2591–2599 (1990).
20. Luo, L. H. *et al.* Identification and characterization of the propanediol utilization protein PduP of *Lactobacillus reuteri* for 3-hydroxypropionic acid production from glycerol. *Appl. Microbiol. Biotechnol.* **89**, 697–703 (2010).
21. Hosoi, N., Ozaki, C., Kitamoto, Y., and Ichikawa, Y. Purification and properties of aldehyde dehydrogenase (acylating) from *Propionibacterium freudenreichii*. *J. Ferment. Technol.* **57**, 418–427 (1979).
22. Atsumi, S. *et al.* Metabolic engineering of *Escherichia coli* for 1-butanol production. *Metab. Eng.* **10**, 305–311 (2008).
23. Sánchez, L. B. Aldehyde dehydrogenase (CoA-acetylating) and the mechanism of ethanol formation in the amitochondriate protist *Giardia lamblia*. *Arch. Biochem. Biophys.* **354**, 57–64 (1998).
24. Koo, O. K. *et al.* Cloning and characterization of the bifunctional alcohol/acetaldehyde dehydrogenase gene (*adhE*) in *Leuconostoc mesenteroides* isolated from kimchi. *Biotechnol. Lett.* **27**, 505–510 (2005).
25. Powlowski, J., Sahlman, L., and Shingler, V. Purification and properties of the physically associated meta-cleavage pathway enzymes 4-hydroxy-2-ketovalerate aldolase and aldehyde dehydrogenase (acylating) from *Pseudomonas* sp. strain CF600. *J. Bacteriol.* **175**, 377–385 (1993).
26. Dellomonaco, C., Clomburg, J. M., Miller, E. N., and Gonzalez, R. Engineered reversal of the  $\beta$ -oxidation cycle for the synthesis of fuels and chemicals. *Nature* **476**, 355–359 (2011).
27. Tang, X., Tan, Y., Zhu, H., Zhao, K., and Shen, W. Microbial conversion of glycerol to 1,3-propanediol by an engineered strain of *Escherichia coli*. *Appl. Environ. Microbiol.* **75**, 1628–1634 (2009).
28. Walter, K. A., Bennett, G. N., and Papoutsakis, E. T. Molecular characterization of two *Clostridium acetobutylicum* ATCC 824 butanol dehydrogenase isozyme genes. *J. Bacteriol.* **174**, 7149–7158 (1992).
29. Zheng, R.-C., Ge, Z., Qiu, Z.-K., Wang, Y.-S., and Zheng, Y.-G. Asymmetric synthesis of (R)-1,3-butanediol from 4-hydroxy-2-butanone by a newly isolated strain *Candida krusei* ZJB-09162. *Appl. Microbiol. Biotechnol.* **94**, 969–976 (2012).
30. Machielsen, R. *et al.* Laboratory evolution of *Pyrococcus furiosus* alcohol dehydrogenase to improve the production of (2S,5S)-hexanediol at moderate temperatures. *Extrem. Life Extreme Cond.* **12**, 587–594 (2008).

31. van der Oost, J. *et al.* Genetic and biochemical characterization of a short-chain alcohol dehydrogenase from the hyperthermophilic archaeon *Pyrococcus furiosus*. *Eur. J. Biochem.* **268**, 3062–3068 (2001).
32. Steinbüchel, A. and Schlegel, H. G. NAD-linked L(+)-lactate dehydrogenase from the strict aerobic *Alcaligenes eutrophus*. 2. Kinetic properties and inhibition by oxaloacetate. *Eur. J. Biochem.* **130**, 329–334 (1983).
33. Lamed, R. J., and Zeikus, J. G. Novel NADP-linked alcohol-aldehyde/ketone oxidoreductase in thermophilic ethanologenic bacteria. *Biochem. J.* **195**, 183–190 (1981).
34. Ismaiel, A. A., Zhu, C. X., Colby, G. D., and Chen, J. S. Purification and characterization of a primary-secondary alcohol dehydrogenase from two strains of *Clostridium beijerinckii*. *J. Bacteriol.* **175**, 5097–5105 (1993).
35. Oda, T. *et al.* Hydrogen-driven asymmetric reduction of hydroxyacetone to (R)-1,2-propanediol by *Ralstonia eutropha* transformant expressing alcohol dehydrogenase from *Kluyveromyces lactis*. *Microb. Cell Factories* **12**, 2 (2013).
36. Molinas, S. M. *et al.* The multifunctional isopropyl alcohol dehydrogenase of *Phytomonas* sp. could be the result of a horizontal gene transfer from a bacterium to the trypanosomatid lineage. *J. Biol. Chem.* **278**, 36169–36175 (2003).
37. Steinbüchel, A., and Schlegel, H. G. A multifunctional fermentative alcohol dehydrogenase from the strict aerobic *Alcaligenes eutrophus*: Purification and properties. *Eur. J. Biochem.* **141**, 555–564 (1984).
38. Sutak, R. *et al.* Secondary alcohol dehydrogenase catalyzes the reduction of exogenous acetone to 2-propanol in *Trichomonas vaginalis*. *FEBS J.* **279**, 2768–2780 (2012).
39. Leitsch, D., Williams, C. F., Lloyd, D., and Duchêne, M. Unexpected properties of NADP-dependent secondary alcohol dehydrogenase (ADH-1) in *Trichomonas vaginalis* and other microaerophilic parasites. *Exp. Parasitol.* **134**, 374–380 (2013).
40. Hou, C. T., Patel, R. N., Laskin, A. I., Barist, I., and Barnabe, N. Thermostable NAD-linked secondary alcohol dehydrogenase from propane-grown *Pseudomonas fluorescens* NRRL B-1244. *Appl. Environ. Microbiol.* **46**, 98–105 (1983).
41. García-Quintáns, N., Repizo, G., Martín, M., Magni, C., and López, P. Activation of the diacetyl/acetoin pathway in *Lactococcus lactis* subsp. *lactis* bv. *diacetylactis* CRL264 by acidic growth. *Appl. Environ. Microbiol.* **74**, 1988–1996 (2008).
42. González, E. *et al.* Characterization of a (2R,3R)-2,3-butanediol dehydrogenase as the *Saccharomyces cerevisiae* YAL060W gene product. Disruption and induction of the gene. *J. Biol. Chem.* **275**, 35876–35885 (2000).
43. Zhang, H., Lountos, G. T., Ching, C. B., and Jiang, R. Engineering of glycerol dehydrogenase for improved activity towards 1, 3-butanediol. *Appl. Microbiol. Biotechnol.* **88**, 117–124 (2010).
44. Yamada Onodera, K., Nariai, H., Tani, Y., and Yamamoto, H. Gene cloning of dihydroxyacetone reductase from a methylotrophic yeast, *Hansenula ofunaensis*, and its expression in *Escherichia coli* HB101 for production of optically active 2-pentanol. *Eng. Life Sci.* **4**, 418–425 (2004).



45. Yamamoto, H., Kawada, N., and Matsuyama, A. Cloning and expression in *Escherichia coli* of a gene coding for a secondary alcohol dehydrogenase from *Candida parapsilosis*. *Biosci. Biotechnol. Biochem.* **6**, 1051–1055 (1999).
46. Man, H., Loderer, C., Ansorge Schumacher, M. B., and Grogan, G. Structure of NADH-dependent carbonyl reductase (CPCR2) from *Candida parapsilosis* provides insight into mutations that improve catalytic properties. *ChemCatChem* **6**, 1103–1111 (2014).
47. Yang, T. *et al.* Asymmetric reduction of 4-hydroxy-2-butanone to (*R*)-1,3-butanediol with absolute stereochemical selectivity by a newly isolated strain of *Pichia jadinii*. *J Ind Microbiol Biotechnol* **41**, 1743–1752 (2014).
48. Kosjek, B. *et al.* Purification and characterization of a chemotolerant alcohol dehydrogenase applicable to coupled redox reactions. *Biotechnol. Bioeng.* **86**, 55–62 (2004).
